# Supplementary material for: Role of BRCA2 DNA-binding and C-terminal domain in its mobility and conformation in DNA repair
Source: eLife journal article supplement (doi:10.7554/elife.67926), 2021-07-13
Supplement: fig1-data1 [file Figure 1 - source data file 1.xlsx]

## Sheet: Figure 1C-F
Figure 1C-F	Clonogenetic cell survivals			p-values from two-sided t-test (Excel) comparing to BRCA2-Halo (full-length)
IR
	wildtype mES cells (n=3)			Mean (%)	p-values		BRCA2-Halo (n=5)					Mean (%)		ΔCTD-Halo (n=4)				Mean (%)	p-values		ΔDBD-Halo (n=3)			Mean (%)	p-values		ΔDBDΔCTD-Halo (n=4)				Mean (%)	p-values		RAD54 -/- (n=3)			Mean (%)	p-values
0	100	100	100	100			100	100	100	100	100	100		100	100	100	100	100			100	100	100	100			100	100	100	100	100			100	100	100	100
2	39.0411	56.25	45.946	47.079	0.0367581		54.2945	55.7851	58.2781	62.7451	64.7059	59.1617		36.218	38.0319	33.1018	24.7059	33.0144	0.000125854		9.21053	19.0298	13.0068	13.749	1.05214e-05		8.19672	8.51064	17.757	20.2532	13.6794	4.09485e-06		31.4356	38.403	34.1797	34.6728	0.000196418
5	6.36986	12.2222	14.1982	10.9301	0.89531		11.1043	11.7906	11.8322	7.93028	10.6443	10.6603		3.26923	1.80851	1.40741	1.74118	2.05658	2.69661e-05		0.789474	0.559701	0.344595	0.56459	4.38245e-05				0.654206	0.050633	0.352419	0.000368829		1.70792	7.50317	2.86458	4.02522	0.00618508
8	1.5411	2.5	3.43243	2.49118	0.028441		1.65644	1.07438	1.35762	0.653595	1.17647	1.1837		0.112179	0.079787	0.074074	0.070588	0.084157	0.000624814															0.014851	0.038023	0.054688	0.035854	0.00200908
Olaparib	BRCA2-Halo (n=3)			Mean (%)			ΔCTD-Halo (n=3)			Mean (%)	p-values			ΔDBD-Halo (n=3)			Mean (%)	p-values		ΔDBDΔCTD-Halo (n=3)			Mean (%)	p-values
0	100	100	100	100			100	100	100	100				100	100	100	100			100	100	100	100
1	73.0159	59.1837	75	69.0665			66.3043	28.4351	29.4326	41.3907	0.108105			2.4581	8.22917	3.68421	4.79049	0.000260398		2.8022	5.71429	3.28571	3.93407	0.000209292
2	67.4603	19.898	35.9375	41.0986			22.7174	9.84733	7.94326	13.5027	0.134114			0.837989	3.85417	0.842105	1.84475	0.0486857		0.21978	3.78151	1.28571	1.76234	0.0484316
3	13.4921	12.8571	20.9375	15.7622			3.1413	3.74046	2.48227	3.12134	0.00848714			0.055866	1.35417	0.105264	0.505099	0.00438324		0.076923	0.957983	0.342857	0.459254	0.0042078
MMC	BRCA2-Halo (n=3)			Mean (%)			ΔCTD-Halo (n=3)			Mean (%)	p-values			ΔDBD-Halo (n=3)			Mean (%)	p-values		ΔDBDΔCTD-Halo (n=3)			Mean (%)	p-values
0	100	100	100	100			100	100	100	100				100	100	100	100			100	100	100	100
0.2	24.296	34.259	50.1397	36.2316			50.1397	71.3043	75.4717	65.6386	0.00869628			1.26438	3.63043	3.60305	2.83262	0.0032554		0.648649	2.72381	4.34091	2.57112	0.000769303
0.3	10.5635	27.778	40.2235	26.1883			40.2235	27.1739	29.9528	32.4501	0.38585			0.241399	3.06522	3.19084	2.16582	0.0210468		0.205406	2.17143	3.79546	2.05743	0.00762401
0.4	8.803	18.8275	25.1397	17.5901			25.1397	24.5652	22.1698	23.9582	0.112263			0.195399	2.06522	2.24428	1.50163	0.0102721		0.151351	1.06667	2.31818	1.17873	0.00288793
Cisplatin	BRCA2-Halo (n=3)			Mean (%)			ΔCTD-Halo (n=3)			Mean (%)	p-values			ΔDBD-Halo (n=3)			Mean (%)	p-values		ΔDBDΔCTD-Halo (n=4)				Mean (%)	p-values
0	100	100	100	100			100	100	100	100				100	100	100	100			100	100	100	100	100
0.5	29.5775	84.9398	95.2381	69.9185			51.3967	54.7826	39.6739	48.6177	0.365664			2.52873	4.78261	2.23464	3.18199	0.0307685		1.5873	4.27027	5.52381	0.879121	3.55773	0.0113197
1	18.592	26.8072	25.7937	23.731			14.1061	10.2174	27.3098	17.2111	0.322621			0.540239	0.130435	0.268157	0.312944	0.000827603		0.15873	0.627027	0.190476	0.197802	0.338435	0.000117419
2	10	2.77108	8.4127	7.06126			3.91061	2.26087	19.837	8.66948	0.802501			0.034489	0.065217	0.167598	0.0891013	0.033598		0.06349	0.12973	0.038095	0.065934	0.0779197	0.0125399

## Sheet: Figure 1G
Figure 1G	HR assay, normalized relative to Full-length BRCA2
	BRCA2 Halo		ΔDBD Halo		ΔCTD Halo #A2		ΔDBDΔCTD Halo #F4
Exp 1	1		0.344086		0.795699		0.462366
Exp 2	1		0.564516				0.645161
Exp 3	1		0.802817		0.830986		0.633803
Exp 4	1		0.445455		0.7		0.527273
Mean	1		0.539219		0.775562		0.567151
	Paired t-test relative to full-length (Graphpad Prism)
		dDBD	dCTD	dDBDdCTD
	Full-length	0.0186	0.0291	0.0021
Source data, not normalized
Experiment 1		% of cells
		HR circular #1	HR circular #2	HR circular -gRNA	-BFP		HR average
WT	BFP+	21.7	17.9	31.5	0.3		19.8
	BFP+mCh+	4.9	4.4	0	0		4.65	1
dDBD	BFP+	18.1	18.6	28.3	0.1		18.35
	BFP+mCh+	1.6	1.6	0	0		1.6	0.344086
dCTD	BFP+	23.6	22.9	32	0.2		23.25
	BFP+mCh+	3.8	3.6	0	0		3.7	0.795699
dDdC	BFP+	16.1	19.3	29.9	0.2		17.7
	BFP+mCh+	2.3	2	0	0		2.15	0.462366
Experiment 2
		HR circular #1	HR circular #2	HR circular -gRNA	-BFP		HR average
WT	BFP+	14.2	15.7	23.7	18.7		14.95
	BFP+mCh+	3.2	3	0	0		3.1	1
dDBD	BFP+	10.5	13.6	23	21.8		12.05
	BFP+mCh+	1.3	2.2	0	0		1.75	0.564516
dDdC	BFP+	13.9	17.2	25	22.4		15.55
	BFP+mCh+	2.1	1.9	0	0		2	0.645161
Experiment 3
		HR circular #1	HR circular #2	HR circular -gRNA	-BFP		HR average
WT	BFP+	17.7	21.3	37	32.8		19.5
	BFP+mCh+	4.4	2.7	0	0		3.55	1
dDBD	BFP+	20.1	23.5	45.7	53.5		21.8
	BFP+mCh+	4.4	1.3	0	0		2.85	0.802817
dCTD	BFP+	28.7	33	50.8	39.6		30.85
	BFP+mCh+	3.3	2.6	0	0		2.95	0.830986
dDdC	BFP+	23.4	30.9	47.3	51.7		27.15
	BFP+mCh+	2.7	1.8	0	0		2.25	0.633803
Experiment 4
		HR circular #1	HR circular #2	HR circular -gRNA			HR average
WT	BFP+	12	14.5	21.8			13.25
	BFP+mCh+	5.6	5.4	0			5.5	1
dDBD	BFP+	9.4	13.9	25.9			11.65
	BFP+mCh+	2.6	2.3	0			2.45	0.445455
dCTD	BFP+	15.2	21.2	34.3			18.2
	BFP+mCh+	4	3.7	0			3.85	0.7
dDdC	BFP+	9.7	12.4	22.5			11.05
	BFP+mCh+	2.9	2.9	0			2.9	0.527273
