# Supplementary material for: Role of BRCA2 DNA-binding and C-terminal domain in its mobility and conformation in DNA repair
Source: eLife journal article supplement (doi:10.7554/elife.67926), 2021-07-13
Supplement: fig1-data2 [file elife-67926-fig1-data2-v2.pdf]

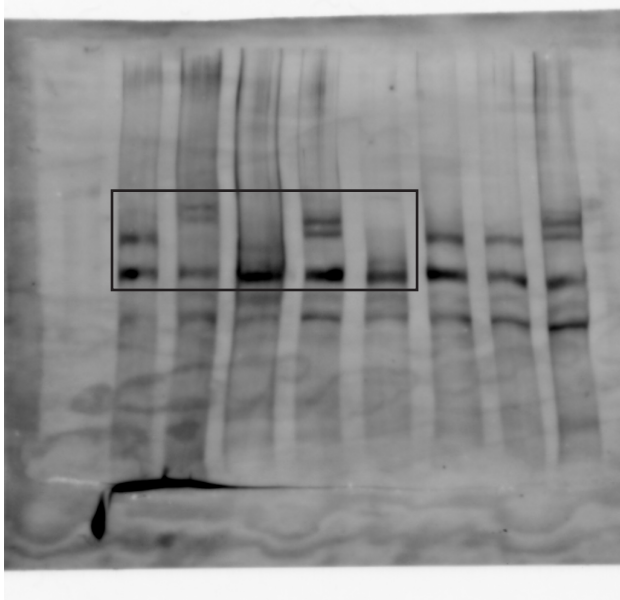

$\alpha$ -mBRCA2

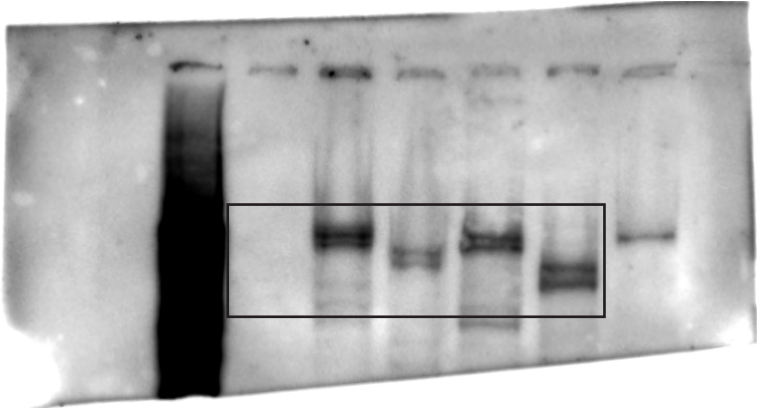

$\alpha$ -HaloTag

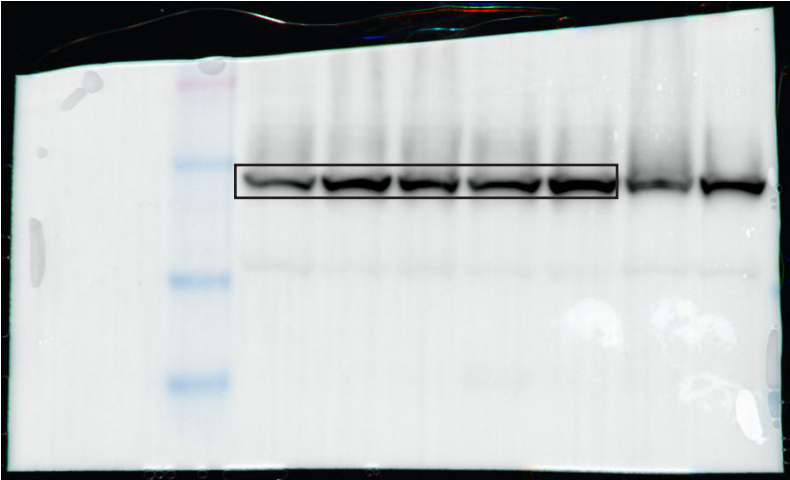

$\alpha$ -PARP-1
