# Supplementary material for: Role of BRCA2 DNA-binding and C-terminal domain in its mobility and conformation in DNA repair
Source: eLife journal article supplement (doi:10.7554/elife.67926), 2021-07-13
Supplement: fig5-data1 [file Replicate data Fig 5.xlsx]

## Sheet: 2. wt BRCA2
wt + 90 mer				wt alone 37
Solidity	Volume_nm^3			Solidity	Volume_nm^3	RNAP equivalents	Skeleton length
0.806818	275.228	0.40594		0.948529	3927.51	5.79279	74
0.650558	1013.85	1.49535		0.887417	663.55	0.978687	63
0.639676	1043.86	1.53962		0.811765	6169	9.09883	176
0.758065	1234.74	1.82115		0.856	4328.46	6.38417	109
0.738776	981.235	1.44725		0.955224	354.22	0.522448	51
0.659794	774.313	1.14205		1	2350.03	3.46613	39
0.639118	1759.26	2.59478		0.894198	7924.53	11.6881	148
0.744681	1629.29	2.40308		0.871849	5860.87	8.64436	223
0.772477	3072.87	4.53226		0.886486	792.467	1.16883	78
0.72	468.67	0.691254		0.825843	1085.98	1.60174	94
0.831858	600.301	0.885399		0.815249	6031.4	8.89587	195
0.689243	997.425	1.47113		0.942857	6081.61	8.96992	117
0.805755	590.502	0.870947		0.93985	1756.86	2.59123	86
0.712121	524.961	0.774278		0.903226	22532.1	33.2331	141
0.759398	601.611	0.887332		0.811927	2111.03	3.11361	156
0.621538	1035.89	1.52787		0.942308	1827.55	2.6955	55
0.712766	2663.46	3.9284		0.941176	1484.44	2.18944	59
0.888889	595.899	0.878906		0.961326	7799.08	11.5031	90
0.825397	493.492	0.727864		0.970588	471.991	0.696151	47
0.690846	2605.82	3.84339		0.932692	1195.77	1.76367	63
0.935484	1030.88	1.52047		0.901639	509.756	0.751853	31
0.77512	1148.76	1.69434		0.781421	655.098	0.966221	117
0.811966	656.21	0.967861		0.950192	14218.3	20.971	98
0.790698	370.761	0.546844		0.917526	716.923	1.05741	109
0.858824	473.388	0.698212		0.94382	908.731	1.34031	51
0.949153	2586.72	3.81522		0.855721	3055.26	4.50629	113
0.787565	962.198	1.41917		0.881579	5423.35	7.99905	113
0.787611	1000.43	1.47556		0.940299	424.586	0.626233	39
0.82906	461.886	0.681247		0.875	3530.88	5.20779	94
1	300.454	0.443148		0.904459	1778.28	2.62283	82
0.715026	781.187	1.15219		0.825843	2509.78	3.70174	98
0.756972	1144.49	1.68804		0.931818	689.774	1.01737	47
0.941176	271.112	0.39987		0.713004	4418.41	6.51683	207
0.648298	2366.2	3.48997		0.959596	803.6	1.18525	35
0.754237	398.453	0.587689		0.667832	8534.73	12.5881	254
0.597468	3118.52	4.59959		0.84472	1554.01	2.29205	86
0.630705	960.393	1.41651		0.900452	3020.41	4.45488	109
0.784141	963.014	1.42037		0.887821	6758.22	9.96788	223
0.707361	3009.23	4.43839		0.876344	831.214	1.22598	86
0.700952	3328.71	4.90961		0.949495	726.118	1.07097	55
0.759091	1134.04	1.67262		0.905512	3021.04	4.45581	63
0.744094	3494.85	5.15464		0.95082	6918.89	10.2048	109
0.76699	1097.37	1.61853		0.928962	3241.92	4.78159	90
0.74	352.795	0.520347		0.969697	415.753	0.613206	55
0.734884	940.819	1.38764		0.951456	1656.19	2.44275	66
0.83871	1215.76	1.79316		0.934211	457.298	0.674482	31
0.709091	913.621	1.34752		0.904459	1264.09	1.86443	82
0.56535	892.237	1.31598		0.935223	3535.38	5.21442	94
0.751479	1200.3	1.77036		0.740196	2580.7	3.80635	188
0.759563	732.89	1.08096		0.926136	1958.12	2.88808	78
0.626459	921.234	1.35875		0.932773	1827.63	2.69562	82
0.53169	801.636	1.18235		0.954128	1959.49	2.89011	51
0.656863	1426.79	2.10442		0.946108	2869.88	4.23287	78
0.703704	840.265	1.23933		0.961957	3152.11	4.64913	98
0.612546	2219.91	3.27421		0.708934	6411.14	9.45596	289
0.774468	1095.63	1.61598		0.874296	9419.14	13.8925	277
0.795775	601.843	0.887675		0.903226	1274.56	1.87988	59
0.810811	1059.82	1.56315		0.864553	12132.3	17.8943	164
0.829493	1082.15	1.59609		0.92029	1354.19	1.99733	63
0.743494	1058.77	1.56161		0.91875	2458.57	3.62622	78
0.71205	3344.6	4.93304		0.907363	8599.39	12.6835	180
0.706897	947.431	1.39739		0.938144	793.243	1.16998	47
0.75	1268.92	1.87157		0.933579	10967.1	16.1757	113
0.584726	1350.01	1.99116		0.948718	1726.16	2.54595	74
0.756477	1595.27	2.35291		0.966102	646.896	0.954124	31
0.728291	1483.83	2.18854		0.826667	1817.34	2.68044	152
0.754864	2229.64	3.28856		0.963855	744.539	1.09814	59
0.729592	1125.02	1.65933		0.971429	803.873	1.18565	39
0.619677	2687.06	3.96322		0.895161	964.296	1.42227	66
0.86413	3085.3	4.55059		0.882716	674.952	0.995505	78
0.707317	1144.38	1.68787		0.888889	1778.71	2.62347	78
0.676	1088.9	1.60605		0.988764	1324.94	1.95419	55
0.622483	2101.54	3.09962		0.868778	1772.61	2.61447	102
0.734375	732.008	1.07966		0.815534	25943.3	38.2644	230
0.881057	10614.3	15.6553		0.918129	935.082	1.37918	90
0.719595	3155.22	4.65372		0.663818	8289.69	12.2267	305
0.655102	2578.7	3.80339		0.960396	1574.37	2.32208	66
0.705128	1536.75	2.26659		0.962963	3754.93	5.53825	98
0.67433	1171.28	1.72755		0.859551	1985.78	2.92888	102
0.655172	1158.98	1.70941		0.956204	1002.11	1.47803	90
0.659864	1218.61	1.79737		0.936508	3385.91	4.99397	102
0.698925	699.4	1.03156		0.953488	1579.72	2.32997	86
0.725557	2934.53	4.32822		0.846667	8019.2	11.8277	160
0.681063	3117.23	4.59768		0.829897	19354.9	28.5471	176
0.806122	915.325	1.35004		0.769231	2465.97	3.63712	211
0.850746	412.864	0.608944		0.775432	4889.82	7.21213	289
0.602649	865.733	1.27689		0.954955	639.399	0.943066	55
0.764912	1545.22	2.27908		0.986667	569.553	0.840049	31
0.920833	12800.8	18.8802		0.883721	1772.38	2.61413	70
0.847162	1113.58	1.64245		0.948454	669.076	0.986838	51
0.683417	750.95	1.1076		0.969072	1032.49	1.52285	55
0.70354	903.065	1.33195		0.907514	9557.28	14.0963	148
0.689034	2395.1	3.5326		0.922078	910.897	1.34351	47
0.624398	2862.2	4.22154		0.91453	3080.34	4.54327	63
0.74477	1257.9	1.85532		0.910112	3532.93	5.21081	90
0.531073	1234.6	1.82095		0.906542	441.729	0.651518	35
0.67803	1245.61	1.83718		0.919831	3278.3	4.83524	125
0.848276	815.751	1.20317		0.863271	8065.53	11.8961	184
0.69883	3087.41	4.5537		0.924623	1265.61	1.86669	102
0.726027	1326.13	1.95595		0.963235	1108.99	1.63569	63
0.68541	2926.79	4.3168		0.922414	1611.89	2.37742	66
0.66787	1128.43	1.66435		0.957746	385.736	0.568933	43
0.60443	1240.41	1.82951		0.973333	396.315	0.584535	39
0.751073	1065.27	1.57119		0.989474	1183.01	1.74485	55
0.656151	1236.43	1.82365		0.944444	364.794	0.538044	51
0.772727	568.003	0.837762		0.927083	422.661	0.623394	47
0.674603	481.166	0.709685		0.893939	1679.47	2.47709	102
0.815603	670.89	0.989513		0.794872	1079.21	1.59176	98
0.69899	2518.57	3.7147		0.889764	890.007	1.3127	98
0.783607	1451.89	2.14144		0.910448	418.7	0.617552	51
0.717754	3112.74	4.59105		0.944134	1538.6	2.26933	109
0.669291	985.66	1.45378		0.844765	6359.63	9.37999	230
0.638889	1172.91	1.72996		0.919643	952.912	1.40547	59
0.705521	1552.87	2.29037		0.881356	2180.41	3.21595	105
0.633229	1404.84	2.07203		0.769953	1506.54	2.22204	145
0.674009	8997.72	13.271		0.985507	380.272	0.560873	47
0.786517	952.946	1.40553		0.950495	3268.84	4.8213	102
0.686275	646.922	0.954162		0.986486	427.115	0.629963	59
0.817308	550.171	0.811462		0.789474	4469.1	6.59159	203
0.720165	1074.29	1.5845		0.741445	1484.97	2.19023	113
0.717557	1224.16	1.80555		0.958678	1521.26	2.24374	66
0.631961	1634.41	2.41064		0.970297	801.875	1.18271	59
0.715596	3177.88	4.68713		0.916667	1002.02	1.4779	82
0.720648	1209.83	1.78441		0.677966	1036.65	1.52898	113
0.687023	922.817	1.36109		0.915493	438.429	0.646651	35
0.704225	1137.71	1.67804		0.90303	972.915	1.43498	102
0.607046	1503.96	2.21823		0.905983	1191.97	1.75807	78
0.732057	966.411	1.42538		0.965909	388.156	0.572502	47
0.666041	2096.21	3.09175		0.700201	2517.17	3.71264	234
0.785294	1737.79	2.56311		0.692683	2733.85	4.03223	262
0.725738	1360.8	2.00708		0.949045	1960.67	2.89185	74
0.75814	1037.2	1.52979		0.925	1041.89	1.53671	35
0.806798	3505.16	5.16985		0.956522	2188.15	3.22735	47
0.807829	3026.63	4.46405		0.985714	431.373	0.636243	27
0.648352	588.972	0.86869		0.965116	780.571	1.15128	43
0.645907	4598.25	6.78207		0.86747	1050.34	1.54917	74
0.860215	3458.6	5.10117		0.98	485.973	0.716774	31
0.730769	1118.68	1.64997		0.885965	1339.39	1.9755	66
0.694215	884.484	1.30455		0.864516	1458.74	2.15154	86
0.602025	4849.18	7.15218		0.621974	3954.93	5.83324	254
0.645833	804.361	1.18637		0.878906	3352.11	4.94412	109
0.699571	923.875	1.36265		0.962733	1843.12	2.71846	98
0.572395	2435.46	3.59213		0.805654	3171.21	4.6773	199
0.833333	703.639	1.03782		0.81962	7229.54	10.663	152
0.779343	1062.45	1.56704		0.966667	436.77	0.644203	47
0.730769	1165.15	1.71851		0.888889	1089.35	1.60671	105
0.675439	974.126	1.43676		0.910891	2520.64	3.71776	63
0.6	2765.82	4.07938		0.824561	2320.52	3.42259	78
0.857143	432.175	0.637426		0.977273	1676.21	2.47229	74
0.701245	1026.35	1.5138		0.962264	371.895	0.548518	35
0.71987	1175.42	1.73366		0.569024	1620.61	2.39028	152
0.699275	1129.98	1.66664		0.888889	2182.25	3.21866	43
0.688776	3999.03	5.89828		0.630265	3855.73	5.68692	320
0.56	880.482	1.29865		0.760213	5232.34	7.71732	332
0.719008	3383.87	4.99095		0.878613	701.257	1.0343	74
0.9	3856.5	5.68806		0.923729	4829.82	7.12363	105
0.75	894.588	1.31945		0.972973	1759.84	2.59563	39
0.707317	1753.35	2.58606		0.981818	738.593	1.08937	31
0.743429	10225.4	15.0817		0.838631	13262.2	19.5607	152
0.810651	1029.06	1.51779		0.88764	16592.8	24.4731	219
0.707317	3074.28	4.53434		0.898148	559.933	0.825861	39
0.788462	1184.92	1.74767		0.969231	358.259	0.528405	47
0.820106	1027.11	1.51491		0.939394	1919.52	2.83115	63
0.711382	1067.53	1.57452		0.629969	1194.09	1.7612	133
0.678733	970.783	1.43183		0.986842	1278.4	1.88554	70
0.5917	3015.34	4.4474		0.932099	2281.94	3.36569	94
0.753363	1060.89	1.56473		0.882353	701.42	1.03454	35
0.78341	4082.48	6.02135		0.857143	2528.81	3.72981	82
0.748593	2865.73	4.22675		0.953125	1680.74	2.47896	66
0.762887	816.32	1.20401		0.957627	1028.98	1.51768	66
0.654762	823.739	1.21495		0.772487	4192.35	6.1834	383
0.761421	886.559	1.30761		0.826667	703.684	1.03788	35
0.566489	1349.46	1.99035		0.665247	3023.86	4.45997	438
0.814332	2849.65	4.20302		0.88	373.022	0.55018	47
0.76555	902.276	1.33079		0.816832	9373.8	13.8257	328
0.618605	901.983	1.33036		0.916667	4076.08	6.01191	117
0.767442	1113.04	1.64166		0.929825	1236.55	1.82383	117
0.735	1044.24	1.54018		1	3317.47	4.89302	43
0.81068	1181.65	1.74284		0.931298	2950.23	4.35137	66
0.590288	2981.81	4.39795		0.920455	396.248	0.584437	43
0.677215	1645.31	2.4267		0.915254	484.206	0.714169	27
0.646288	3023.05	4.45878		0.917431	1185.51	1.74854	66
0.70639	3232.77	4.7681		0.912088	395.559	0.58342	43
0.767296	869.377	1.28227		0.893939	2939.29	4.33524	74
0.768638	2083.34	3.07277		0.9	380.246	0.560835	66
0.699074	1052.37	1.55217		0.930348	2411.16	3.55628	105
0.79646	1139.08	1.68006		0.898089	4506.71	6.64707	82
0.788079	723.407	1.06697		0.780303	1654.97	2.44095	145
0.612033	1535.43	2.26464		0.866667	479.997	0.707961	59
0.618605	744.152	1.09757		0.855172	843.894	1.24468	86
0.789474	496.293	0.731995		0.963855	937.664	1.38299	47
0.67128	2976.42	4.39		0.890909	1200.52	1.77068	59
0.646127	2651.92	3.91139		0.942308	2670.58	3.93891	141
0.66725	3156.03	4.65491		0.902174	2067.77	3.0498	137
0.742424	521.693	0.769458		0.881844	6967.07	10.2759	180
0.87027	1070.37	1.57871		0.920792	640.892	0.945268	63
0.747664	419.442	0.618646		0.924242	1399.4	2.06401	90
0.567055	2394.07	3.53108		0.93007	1921.19	2.83361	70
0.734783	970.119	1.43085		0.919614	5474.38	8.0743	176
0.829016	943.034	1.39091		0.978947	610.268	0.9001	63
0.699571	968.015	1.42775		0.864139	8918.02	13.1534	332
0.704918	631.31	0.931136		0.981481	1902.08	2.80543	51
0.591954	509.117	0.75091		0.753247	13842.2	20.4163	270
0.751323	878.485	1.2957		0.538674	1019.81	1.50414	199
0.71875	978.204	1.44278		0.970149	23763.5	35.0494	422
0.645244	1403.45	2.06999		0.969101	2643.3	3.89868	105
0.740385	8894.18	13.1183		0.956284	1903.42	2.8074	82
0.626667	996.341	1.46953		0.695157	23195.4	34.2115	426
0.65	996.153	1.46925		0.912088	868.133	1.28043	59
0.641509	2595.35	3.82795		0.967742	2715.84	4.00567	63
0.883721	1105.44	1.63044		0.932886	1094.23	1.6139	90
0.650075	2960.77	4.36691		0.796834	4944.76	7.29316	371
0.767677	974.098	1.43672		0.955056	3186.05	4.69919	82
0.936842	3867.26	5.70392		0.928571	3120.3	4.60222	129
0.780612	1011.1	1.4913		0.966667	2872.62	4.2369	47
0.539286	877.852	1.29477		0.924051	50995	75.2139	301
0.60177	860.537	1.26923		0.927083	460.862	0.679738	39
0.661261	2090.62	3.08351		0.882227	14462.9	21.3317	148
0.665227	1829.95	2.69905		0.901042	5063.1	7.4677	86
0.587912	3762.33	5.54916		1	465.295	0.686275	31
0.634409	1085.93	1.60167		0.966667	406.963	0.600241	39
0.667969	920.671	1.35792		0.914683	15475.6	22.8254	168
0.66881	1079.03	1.59148		0.931298	1270.84	1.8744	74
0.636704	1114.97	1.64449		0.893401	3593.44	5.30005	74
0.706587	677.525	0.999299		0.944882	1256.01	1.85252	51
0.725352	758.901	1.11932		0.919614	5803.96	8.56041	121
0.824176	985.356	1.45333		0.933029	25505	37.618	258
0.792453	879.854	1.29772		0.895455	5220.03	7.69915	105
0.604651	2741.86	4.04405
0.669456	1010.48	1.49039
0.711893	3339.2	4.92508
0.59593	1152.16	1.69934
0.678862	1078.67	1.59095
0.611594	1163.16	1.71557
0.637097	1928.07	2.84377
0.771429	1063.65	1.56881
0.764486	3263.63	4.81361
0.756637	910.755	1.3433
0.699825	2478.8	3.65605
0.740672	2608.37	3.84715
0.603399	1256.79	1.85367
0.914286	529.872	0.781521
0.839572	1151.33	1.69813
0.64	681.135	1.00462
0.716981	908.788	1.34039
0.754717	682.863	1.00717
0.768	960.623	1.41685
0.869198	1145.29	1.68923
0.714286	2461.92	3.63115
0.718147	1004.61	1.48173
0.857868	992.927	1.46449
0.694064	961.579	1.41826
0.779487	1058	1.56046
0.713568	979.983	1.4454
0.634146	888.326	1.31022
0.662222	923.644	1.36231
0.846154	361.125	0.532633
0.677083	2959.96	4.36572
0.69145	1090.54	1.60847
0.618644	815.455	1.20274
0.644737	2756.56	4.06572
0.78	1066.9	1.5736
0.644809	735.131	1.08426
0.615804	1319.34	1.94593
0.561905	1410.69	2.08067
0.757576	971.077	1.43227
0.660959	1148.89	1.69452
0.80117	744.992	1.09881
0.648746	2196.74	3.24002
0.708333	2526.63	3.7266
0.646091	910.954	1.34359
0.641256	894.04	1.31864
0.762431	825.775	1.21796
0.778261	970.81	1.43187
0.747899	2783.66	4.10569
0.732673	988.908	1.45857
0.659574	1049.09	1.54733
0.565693	986.061	1.45437
0.734177	796.478	1.17475
0.675579	2728.85	4.02485
0.583851	1484.48	2.1895
0.786996	2574.98	3.79791
0.642147	4976.55	7.34005
0.703863	954.03	1.40712
0.822335	1120.35	1.65244
0.62766	882.344	1.30139
0.723982	1141.76	1.68401
0.704225	12310	18.1563
0.948276	535.457	0.78976
0.869369	6549.46	9.65997
0.907895	2266.09	3.34231
0.673043	2449.79	3.61325
0.716346	747.037	1.10182
0.798913	798.3	1.17743
0.706667	1045.51	1.54205
0.589474	1675.31	2.47096
0.710526	1056.05	1.5576
0.754902	1069.31	1.57715
0.792961	3379.73	4.98485
0.726368	984.531	1.45211
0.64466	2104.59	3.10412
0.719457	1013.15	1.49432
0.759615	621.833	0.917158
0.62766	1309.94	1.93206
0.716346	6243.79	9.20913
0.660754	2143.01	3.16077
0.670588	1084.51	1.59958
0.747126	975.787	1.43921
0.742248	3217.64	4.74578
0.785714	982.664	1.44936
0.676471	1390.45	2.05081
0.529412	1073.09	1.58273
0.664463	2389.99	3.52506
0.63913	753.769	1.11175
0.62116	1080.57	1.59377
0.655678	1146.5	1.691
0.675676	1045.98	1.54274
0.68254	1154.09	1.70219
0.612346	1612.52	2.37834
0.663934	1061.17	1.56515
0.70639	3367.73	4.96716
0.620384	3193.91	4.71078
0.672783	3025.27	4.46205
0.773694	2783.4	4.10531
0.67623	966.075	1.42489
0.692708	2680.49	3.95353
0.7	2099.56	3.0967
0.709459	2803.34	4.13472
0.574576	2177.19	3.21119
0.843902	1265.32	1.86625
0.78534	1214.69	1.79157
0.625397	2030.78	2.99525
0.722365	9459.77	13.9525
0.658385	1448.47	2.13639
0.755814	909.264	1.3411
0.532819	629.72	0.92879
0.673913	892.796	1.31681
0.693227	826.185	1.21856
0.611913	2155.28	3.17887
0.587302	941.308	1.38836
0.613139	1081.43	1.59503
0.677686	3089.92	4.55741
0.689266	1495.72	2.20608
0.573314	3307.37	4.87812
0.677606	2823.49	4.16445
0.677686	500.132	0.737658
0.604096	1098.52	1.62023
0.630068	2612.89	3.85382
0.721393	901.801	1.33009
0.6	1551.16	2.28785
0.622837	1102.73	1.62645
0.704918	1281.84	1.89062
0.557522	1243.52	1.8341
0.803191	1126.35	1.66128
0.62987	2755.96	4.06484
0.717672	2363.98	3.4867
0.61	2169.3	3.19955
0.73516	979.316	1.44442
0.528902	991.763	1.46278
0.768519	493.367	0.72768
0.682456	2747.3	4.05206
0.706977	1024.7	1.51135
0.597701	2028.3	2.99159
0.77686	3310.42	4.88263
0.681159	1302.45	1.92101
0.598726	595.094	0.877719
0.594937	1265.77	1.86692
0.798122	1134.93	1.67393
0.817391	587.231	0.866122
0.692615	3118.78	4.59997
0.836364	593.625	0.875553
0.792453	503.767	0.743019
0.741784	1317.8	1.94366
0.763736	889.352	1.31173
0.52901	935.288	1.37948
0.602113	1012.75	1.49373
0.574627	1712.83	2.5263
0.593583	790.525	1.16597
0.670498	2785.09	4.1078
0.704348	939.966	1.38638
0.664825	3442.23	5.07703
0.649842	15939.4	23.5095
0.722467	1822.24	2.68767
0.760181	475.377	0.701146
0.90625	21385.9	31.5426
0.594752	2786.98	4.11059
0.656522	949.49	1.40043
0.730483	2780.79	4.10146
0.714765	959.773	1.41559
0.470588	721.031	1.06347
0.542308	842.53	1.24267
0.640909	809.068	1.19332
0.797619	1115.91	1.64589
0.716346	989.863	1.45998
0.623656	1100.91	1.62376
0.537549	966.853	1.42604
0.553846	1278.67	1.88595
0.698492	1783.84	2.63104
0.703947	683.27	1.00777
0.706349	579.851	0.855237
0.679487	800.134	1.18014
0.746479	2218.17	3.27164
0.619651	3013.17	4.4442
0.669173	1982.93	2.92468
0.730435	1149.76	1.6958
0.634573	1718.94	2.53532
0.586572	2217.84	3.27115
0.736957	2616.56	3.85923
0.665354	1172.18	1.72887
0.626446	2487.09	3.66828
0.588589	1178.71	1.73851
0.625	1046.93	1.54414
0.662338	1084.43	1.59945
0.806818	721.364	1.06396
0.748538	866.152	1.27751
0.659193	902.474	1.33108
0.778302	1051.86	1.55142
0.653061	992.903	1.46446
0.692308	993.974	1.46604
0.524138	909.488	1.34143
0.554098	851.805	1.25635
0.497283	942.212	1.38969
0.715789	639.133	0.942674
0.632184	799.975	1.1799
0.6	863.624	1.27378
0.658635	1095.08	1.61517
0.627451	639.133	0.942674
0.656716	3025.71	4.4627
0.888298	975.778	1.4392
0.751131	1018.27	1.50188
0.554622	1330.41	1.96226
0.811429	993.222	1.46493
0.635246	1036.06	1.52811
0.623214	2438.5	3.59661
0.672489	983.088	1.44998
0.694175	831.401	1.22626
0.555556	944.444	1.39298
0.844595	701.416	1.03454
0.710145	524.496	0.773593
0.779817	529.734	0.781318
0.588235	1188.09	1.75234
0.847953	1282.57	1.8917
0.657371	997.048	1.47057
0.565104	1680.27	2.47827
0.589394	2680.71	3.95385
0.662289	2807.3	4.14056
0.604478	1140.04	1.68147
0.688755	2647.87	3.90542
0.865497	4645.5	6.85177
0.79558	1021	1.50591
0.679012	1050.63	1.5496
0.770161	1072.31	1.58158
0.626437	664.683	0.980359
0.587234	857.749	1.26512
0.686275	1047.03	1.5443
0.688889	998.118	1.47215
0.549254	1018	1.50147
0.884892	6677.44	9.84873
0.644013	2572.72	3.79458
0.735099	5326.44	7.85611
0.624	3257.29	4.80426
0.685106	660.456	0.974124
0.723214	436.457	0.643742
0.7	412.324	0.608148
0.710227	3056.21	4.50769
0.888889	405.649	0.598302
0.714286	441.169	0.650692
0.637209	818.826	1.20771
0.674312	1124.38	1.65837
0.674312	1124.38	1.65837
0.813559	519.697	0.766515
0.691964	1017.53	1.50078
0.692623	1214.73	1.79163
0.710938	539.929	0.796355
0.795918	1365.72	2.01434
0.663653	2854.36	4.20997
0.561404	950.187	1.40146
0.613559	2290.97	3.37902
0.518248	828.362	1.22177
0.547718	863.302	1.27331
0.558594	825.724	1.21788
0.647059	1249.53	1.84296
0.583072	2691.62	3.96994
0.629325	2585.24	3.81304
0.636471	4329.13	6.38515
0.648649	1045.45	1.54196
0.665354	959.936	1.41583
0.625455	942.615	1.39029
0.655827	1700.17	2.50763
0.740741	842.413	1.2425
0.731183	984.017	1.45135
0.699134	2191.72	3.23262
0.902174	2287.48	3.37387
0.756757	591.182	0.87195
0.748503	794.804	1.17228
0.650862	842.746	1.24299
0.666667	2513.57	3.70733
0.61435	829.497	1.22345
0.630068	2616.79	3.85957
0.649194	899.215	1.32628
0.79	957.306	1.41196
0.574176	2508.96	3.70053
0.728625	1358.72	2.00401
0.598456	918.713	1.35503
0.546032	1009.27	1.4886
0.670782	927.13	1.36745
0.798611	683.377	1.00793
0.646481	2926.97	4.31707
0.667774	1423.58	2.09968
0.629139	531.324	0.783663
0.593023	1115.28	1.64496
0.543103	2358.69	3.4789
0.662745	4035.93	5.9527
0.573034	849.123	1.25239
0.651685	1341.83	1.9791
0.63741	2805.63	4.1381
0.741877	2687.09	3.96327
0.587838	1068.84	1.57647

## Sheet: 2. del DBD + 90mer
Del DBD + 90 mer						Del DBD 37
Solidity	Volume_nm^3	RNAP equivalents	Skeleton length			Solidity	Volume_nm^3	RNAP equivalents	Skeleton length
0.879781	772.02	1.13867	133			0.944828	2524.88	3.72401	102
0.778471	8183.35	12.0698	379			0.967213	981.863	1.44817	43
0.925373	1164.42	1.71744	180			1	365.546	0.539154	47
0.751073	2924.71	4.31373	387			0.986486	599.407	0.884082	43
0.628378	321.857	0.474715	35			0.979167	550.742	0.812303	27
0.888889	341.576	0.5038	86			0.976378	2865.5	4.2264	78
0.835616	6296.77	9.28728	203			0.621711	1815.58	2.67784	297
0.917647	559.354	0.825006	94			0.977273	1049.7	1.54824	35
0.912	615.07	0.907183	66			0.697947	1238.25	1.82633	168
0.886792	1231.29	1.81606	148			0.962733	1855.38	2.73655	59
0.907895	3244.07	4.78477	98			0.867435	5314.17	7.83801	219
0.917763	29326.7	43.2547	230			1	302.254	0.445802	27
0.906832	1239.09	1.82757	141			0.9	312.413	0.460786	47
0.856771	9017.79	13.3006	168			0.938776	397.619	0.586459	31
0.856164	18432.5	27.1866	363			1	794.301	1.17153	27
0.842424	2290.8	3.37876	164			0.977273	324.568	0.478714	27
0.740651	12290.9	18.1282	387			0.945055	3826.45	5.64373	121
0.895706	655.297	0.966515	129			0.936508	360.497	0.531706	43
0.945946	323.031	0.476447	27			0.859375	9453.78	13.9436	133
0.779018	12881.2	18.9988	133			0.965517	328.875	0.485067	35
0.738739	518.73	0.765089	27			0.888889	1340.14	1.97661	86
0.747967	6547.14	9.65655	86			0.947368	439.706	0.648534	39
0.957447	469.802	0.692923	20			0.96875	425.665	0.627825	63
0.900433	10756.4	15.8649	94			0.909574	3009.72	4.43912	105
0.976923	2998.96	4.42325	63			0.923077	342.41	0.505029	51
0.760234	2425.16	3.57694	137			0.935484	318.857	0.47029	31
0.945255	15442	22.7759	105			0.954023	1237.46	1.82516	55
0.972222	564.285	0.832279	31			0.970803	1553.43	2.29119	59
0.888889	454.564	0.670448	35			0.918919	711.271	1.04907	66
0.860465	6084.08	8.97356	148			0.971014	1017.36	1.50053	59
0.886364	594.449	0.876768	94			1	313.446	0.46231	31
0.838095	458.061	0.675607	78			0.870968	3007.3	4.43554	125
0.934783	5456.15	8.04742	156			0.936937	2329.01	3.43511	70
0.823009	487.05	0.718363	59			0.90604	2181.6	3.21771	70
0.917526	4667.9	6.88481	105			0.915033	1811.1	2.67125	129
0.95	605.311	0.89279	23			0.974359	467.902	0.690121	35
0.873832	6392.92	9.42909	78			0.860465	384.697	0.567399	55
0.962264	516.742	0.762157	16			0.832168	896.727	1.32261	109
0.957447	360.741	0.532067	20			0.898876	1260.9	1.85973	55
0.929577	437.55	0.645353	43			0.759036	705.529	1.0406	168
0.940299	322.591	0.475798	43			1	589.002	0.868735	39
0.866242	678.062	1.00009	66			0.845833	2458.08	3.62549	129
0.93617	356.508	0.525823	31			0.846154	3033.64	4.47439	145
0.861635	741.48	1.09363	109			0.940594	1392.73	2.05417	63
0.926829	582.303	0.858855	55			0.94	409.559	0.604069	39
0.967213	1443.67	2.12931	43			0.909091	484.234	0.71421	59
0.9	306.287	0.451751	31			0.980392	485.117	0.715512	31
0.868421	389.832	0.574974	43			1	432.234	0.637514	39
0.976744	401.495	0.592175	27			1	388.272	0.572673	31
0.979592	323.33	0.476888	23			0.914634	330.179	0.48699	59
0.981481	1082.08	1.59599	43			0.953125	1002.37	1.47842	31
0.942029	1020.58	1.50529	51			0.86039	6611.67	9.75172	188
0.89172	3080.58	4.54363	70			0.965517	861.926	1.27128	43
0.814607	3577.51	5.27656	148			1	314.429	0.463759	20
0.816456	1033.05	1.52367	78			0.963855	1859.91	2.74322	70
0.985075	794.838	1.17233	55			0.933333	488.035	0.719816	70
0.952381	555.291	0.819013	31			0.92126	2043.34	3.01377	55
0.88172	704.765	1.03948	70			0.917241	916.674	1.35203	82
0.93	1968.23	2.90299	47			0.835938	8767.69	12.9317	137
0.830275	1146.9	1.6916	117			0.910891	948.907	1.39957	59
0.960396	1631.88	2.4069	43			0.957447	2348.08	3.46325	47
0.894942	4461.03	6.57969	141			0.8625	501.809	0.740131	47
0.926471	441.237	0.650792	59			0.935484	1794.92	2.64738	47
0.81875	572.82	0.844868	98			0.957447	368.963	0.544193	31
0.860759	439.71	0.64854	59			0.93125	5509.43	8.12601	78
0.935897	1233.49	1.8193	55			0.883333	1891.66	2.79007	70
0.95082	8030.98	11.8451	82			0.666667	1222.94	1.80375	141
0.93578	757.75	1.11763	70			0.982456	787.084	1.16089	31
0.883576	17388.4	25.6466	246			0.94	328.13	0.483968	39
0.813299	8399.27	12.3883	234			0.924528	350.382	0.516788	35
0.927536	437.044	0.644608	43			0.778351	691.966	1.0206	98
0.94186	1148.06	1.69331	59			0.963636	347.794	0.51297	35
0.91875	2309.66	3.40658	94			0.942029	359.585	0.530362	43
0.933628	4495.6	6.63068	117			0.958333	1778.42	2.62304	47
0.938547	3320.87	4.89804	82			0.972973	367.693	0.542321	35
0.93865	8753	12.91	164			0.929577	299.544	0.441805	39
0.895028	5465.9	8.0618	63			0.907216	1994.87	2.94228	74
0.974684	3700.65	5.45818	94			0.942308	340.463	0.502158	43
0.94702	3305.53	4.87541	82			0.95122	486.819	0.718022	39
0.923706	9003.19	13.279	141			0.865854	507.727	0.74886	31
0.929134	15452.5	22.7913	148			0.876923	307.851	0.454057	43
0.948718	557.869	0.822816	20			0.975	515.953	0.760993	31
0.90566	505.803	0.746023	47			0.980769	387.208	0.571103	23
0.890909	745.825	1.10004	55			0.900277	7328.62	10.8092	195
0.96748	1382.32	2.03882	59			0.920635	685.675	1.01132	39
0.929348	4211.86	6.21218	102			0.975309	1291.85	1.90538	43
0.901869	4027.44	5.94017	86			0.887931	1228.55	1.81202	74
0.935673	5333.49	7.8665	78			0.978022	888.251	1.31011	43
0.905405	6585.35	9.71291	86			0.96	1436.57	2.11883	66
0.940887	9635.85	14.2122	90			0.970149	557.433	0.822173	35
0.962547	6896.31	10.1716	117			0.935185	1194.48	1.76177	66
0.962963	529.27	0.780634	31			0.965517	2205.58	3.25306	51
0.865306	11301.5	16.6689	145			0.910891	726.339	1.0713	55
0.932203	411.529	0.606975	31			0.898148	1275.15	1.88076	55
0.908824	13046.8	19.243	160			0.787234	362.18	0.534189	47
0.962963	956.12	1.41021	47			0.954955	1537.06	2.26705	70
0.956938	3910.4	5.76755	117			0.909836	4813.74	7.0999	141
0.963636	2582.51	3.80901	63			0.946429	499.071	0.736093	23
0.861386	20898.4	30.8235	195			0.828829	681.817	1.00563	82
0.873303	4697.99	6.92918	70			0.927536	338.441	0.499176	39
0.947368	341.269	0.503347	23			0.945205	556.836	0.821291	43
0.929412	11610.2	17.1243	66			0.91	1435.85	2.11777	66
0.979592	633.978	0.93507	31			0.975904	890.056	1.31277	43
0.932468	20634.2	30.4339	90			0.970874	1248.47	1.84139	63
0.969697	347.233	0.512144	23			0.908397	1126.72	1.66183	70
0.89604	4658.34	6.8707	55			1	323.208	0.476708	39
0.925926	2590.6	3.82094	63			0.954545	517.515	0.763296	31
0.884804	20896.3	30.8205	152			0.92623	1309.37	1.93122	63
0.833333	1637.16	2.41468	59			0.962963	1316.54	1.9418	66
0.944444	455.106	0.671248	31			0.9375	350.152	0.516448	35
0.942623	12924.1	19.0621	102			0.784672	1676.64	2.47291	98
0.945946	467.157	0.689022	20			0.968254	841.109	1.24057	43
0.859922	1748.48	2.57888	43			0.974138	3353.18	4.94569	63
0.884615	2177.69	3.21193	51			0.944444	408.041	0.60183	51
1	1094.12	1.61374	43			0.919481	24166.5	35.6439	180
0.946524	12496.2	18.431	70			0.955357	4544.07	6.70216	55
0.902439	446.651	0.658777	23			0.7075	4385.45	6.46822	195
0.871369	3360.66	4.95673	66			0.859532	14978.4	22.092	254
0.969697	9455.15	13.9457	78			1	1133.52	1.67186	39
0.961538	691.534	1.01996	23			0.97619	368.782	0.543927	27
0.97619	352.17	0.519425	20			0.972973	312.567	0.461014	20
0.872727	1016.01	1.49853	27			0.961538	3500.98	5.16369	51
0.922179	19309.9	28.4807	176			0.911111	2193.67	3.2355	55
0.969697	9451.08	13.9396	82			0.812081	1931.6	2.84897	74
0.965909	1440.25	2.12427	35			0.963415	558.2	0.823303	59
0.961039	868.097	1.28038	27			0.890625	493.753	0.728249	23
0.80198	314.904	0.464461	23			1	987.977	1.45719	55
0.971429	1781.75	2.62795	43			1	707.614	1.04368	39
0.96875	15453.9	22.7933	86			0.974359	506.757	0.747429	27
0.979592	364.412	0.53748	23			0.895349	1029.85	1.51896	66
0.942029	3033.74	4.47454	59			0.973684	345.563	0.50968	27
0.940299	759.76	1.12059	27			0.971429	3366.77	4.96574	59
0.98	801.22	1.18174	39			0.905213	6102.56	9.00083	125
0.949153	935.857	1.38032	31			0.942308	452.759	0.667786	51
0.911392	1043.97	1.53978	39			0.79602	1035.98	1.52799	109
0.959302	4549.11	6.7096	55			0.97619	891.58	1.31502	43
0.948718	1203.42	1.77495	35			0.960396	1699.03	2.50595	59
0.837121	2272.49	3.35175	145			0.985714	1437.2	2.11976	47
0.883721	486.817	0.71802	27			0.982456	1042.44	1.53752	47
0.798387	587.714	0.866834	43			0.888889	394.27	0.58152	63
0.91453	2123.08	3.13138	63			0.943925	3272.02	4.82598	78
0.848684	1814.22	2.67584	59			0.806962	5518.08	8.13876	191
0.899425	21547.9	31.7816	125			0.890909	5634.7	8.31076	199
0.972222	4301.6	6.34454	63			0.911111	445.011	0.656359	66
0.973684	1314.01	1.93807	31			0.850202	1388.92	2.04855	121
1	299.538	0.441797	27			0.91875	1815.17	2.67725	98
0.867647	431.236	0.636041	35			0.967742	1284.03	1.89385	70
0.972222	2017.21	2.97524	47			0.676976	906.459	1.33696	145
0.930556	1066.5	1.57301	47			0.945946	651.767	0.961308	51
0.980392	770.979	1.13714	39			1	428.741	0.632361	23
0.927083	805.097	1.18746	55			0.943182	1147.06	1.69182	59
0.886228	4459.15	6.57691	86			1	564.355	0.832382	35
0.934066	1036.43	1.52866	59			0.731563	1096.91	1.61787	121
0.982759	487.341	0.718793	31			0.840909	2123.76	3.13239	74
0.981818	344.263	0.507763	35			0.929577	718.658	1.05997	51
0.957447	305.774	0.450993	31			0.913669	1140.84	1.68266	86
0.895082	12980.4	19.1451	109			0.918216	7327.65	10.8077	133
0.961538	351.66	0.518672	35			0.983333	426.648	0.629274	39
0.96875	495.84	0.731327	31			0.976744	1434.47	2.11574	47
0.929293	1034.05	1.52514	59			0.904255	3586.1	5.28923	121
0.89759	4461.14	6.57985	66			0.854839	5704.05	8.41305	121
0.973684	377.524	0.55682	23			0.864865	438.659	0.646989	55
0.961538	774.629	1.14252	27			0.95082	511.102	0.753837	47
0.952381	413.304	0.609593	31			0.97561	441.124	0.650626	16
0.881356	10649.5	15.7073	117			0.896907	1111.93	1.64001	63
1	1287.79	1.8994	47			0.877551	310.617	0.458137	35
0.956522	363.524	0.536171	27			0.974359	308.639	0.45522	35
0.928571	887.482	1.30897	43			0.853333	1006.39	1.48435	113
0.934156	6271	9.24927	121			0.895161	1385.13	2.04297	94
0.981818	686.142	1.01201	23			0.945736	4280.33	6.31316	94
0.953846	364.139	0.537078	23			0.831579	410.326	0.605201	86
0.956522	4690.53	6.91818	74			0.946429	424.585	0.626231	31
0.948718	1226.14	1.80846	43			0.928571	851.292	1.25559	59
0.947368	1078.28	1.59038	39			0.980769	499.292	0.736419	51
0.88785	624.171	0.920606	66			0.827957	468.584	0.691126	47
0.941176	896.644	1.32248	43			0.752322	3549.6	5.23539	160
0.980769	504.712	0.744413	23			1	362.428	0.534554	35
0.945652	889.461	1.31189	31			0.972222	365.24	0.538702	31
0.893004	7531.66	11.1086	74			1	306.615	0.452234	31
0.8	710.438	1.04784	47			0.631579	1318.05	1.94402	160
0.894231	723.649	1.06733	51			0.943662	486.583	0.717674	39
0.924528	1127.94	1.66363	47			1	331.442	0.488852	39
0.968504	1374.07	2.02666	63			0.933333	1332.95	1.96601	47
0.863192	5730.24	8.45169	109			0.918367	372.861	0.549943	35
0.89899	2126.73	3.13677	82			0.944444	304.768	0.449511	31
0.81761	1049.56	1.54802	63			0.906667	402.055	0.593001	43
0.924242	360.012	0.530991	51
0.983607	916.196	1.35132	39
0.917051	7938.39	11.7085	86
0.967742	1651.04	2.43516	43
0.887097	369.309	0.544704	43
0.956897	1999.78	2.94953	47
0.816901	6192.3	9.13319	156
0.840336	4054.61	5.98025	98
0.909774	1585.94	2.33915	55
0.812766	2859.1	4.21697	117
0.98	358.209	0.528332	35
0.808383	7695.12	11.3497	141
0.809353	12217.4	18.0198	273
0.923767	5326.71	7.85651	86
0.938983	7999.49	11.7987	125
0.967742	431.77	0.636829	39
0.9625	836.345	1.23355	47
0.874126	1759.09	2.59453	35
0.912281	315.494	0.465331	27
0.974026	450.772	0.664855	51
0.962963	291.751	0.430312	35
0.840336	2752.73	4.06008	59
0.797101	3293.85	4.85819	94
0.921569	375.864	0.554371	39
0.94	369.573	0.545093	31
0.896552	395.971	0.584028	39
0.911765	375.194	0.553383	31
0.814815	2403.79	3.54542	47
0.823799	7451.43	10.9903	188
0.91	388.086	0.572398	35
0.946429	395.654	0.58356	39
0.854922	2560.69	3.77683	90
0.716667	916.213	1.35135	78
0.91358	7397.41	10.9106	117
0.920792	878.062	1.29508	70
1	1630.6	2.40502	39
0.748031	3652.75	5.38753	148
0.935714	1164.39	1.71739	59
0.921569	3308.46	4.87973	82
0.911392	1541.35	2.27338	66
0.875	1173.6	1.73098	59
0.968254	498.305	0.734964	23
0.947368	2741.37	4.04332	70
0.847087	4677.81	6.89942	191
0.964912	642.421	0.947523	51
0.984043	11747.1	17.3262	82
0.947368	958.381	1.41354	31
0.874286	9697.16	14.3026	109
0.787086	9830.86	14.4998	203
0.927928	4918.99	7.25515	121
0.952991	3631.07	5.35557	102
0.883721	520.341	0.767465	39
0.804545	14195	20.9366	195
0.929412	6324.99	9.3289	156
0.973684	2009.54	2.96392	59
0.889262	14576.5	21.4993	133
0.927835	4696.36	6.92678	90
0.958333	1232.77	1.81824	63
0.957447	3877.49	5.719	35
0.909677	2326.74	3.43177	59
0.96	421.143	0.621156	31
0.961538	564.908	0.833197	31
0.931034	1072.25	1.58149	39
0.873874	674.346	0.994611	27
0.872727	5737.09	8.46178	137
0.954545	427.757	0.63091	23
0.910394	9093.78	13.4127	109
0.855204	3151.53	4.64828	66
0.888889	375.928	0.554466	23
0.885714	363.689	0.536415	20
0.941176	655.643	0.967025	31
0.922764	6246.75	9.2135	74
0.905537	15995.1	23.5916	78
0.956522	483.775	0.713533	39
0.865801	6781.48	10.0022	105
0.953488	3850.65	5.67943	59
0.971831	1500.79	2.21356	43
0.891304	2286.61	3.37257	82
0.957746	860.419	1.26906	47
0.95122	361.966	0.533873	31
0.977273	543.331	0.801373	47
0.847826	729.897	1.07654	35
0.947368	590.743	0.871302	47
0.764151	2164.4	3.19234	78
0.888889	583.218	0.860204	47
0.85	10115.8	14.9201	148
0.901099	849.407	1.25281	70
0.880952	5146.51	7.59072	105
0.892655	4357.26	6.42664	215
0.854167	3112.78	4.59112	145
0.87619	933.017	1.37613	39
0.965909	1404.6	2.07168	35
0.981481	332.026	0.489714	35
0.848958	11819.4	17.4328	129
0.954545	380.587	0.561337	20
0.972727	1197.74	1.76658	51
0.945392	13231.5	19.5155	121
0.959184	965.307	1.42376	55
0.9	445.623	0.657261	51
0.938406	13607.1	20.0694	90
0.901235	1234.45	1.82072	98
0.810997	7378.21	10.8823	86
0.976	3273.27	4.82782	63
0.943662	779.909	1.15031	35
0.937984	3306.61	4.87701	59
0.960265	4840.83	7.13987	63
0.915789	1654.49	2.44025	59
0.83125	1237.11	1.82465	74
0.887681	3677.02	5.42334	86
0.963115	12119.8	17.8758	102
0.917647	1476.96	2.1784	31
0.837912	7093.93	10.463	70
0.948454	11345.9	16.7344	113
0.962264	526.523	0.776582	31
0.975	335.131	0.494294	39
0.911111	2314.64	3.41393	51
0.875289	12535.7	18.4892	156
0.8125	771.673	1.13816	31
0.864721	2358.42	3.4785	141
0.734114	3659.32	5.39723	125
0.863248	10546.9	15.5559	180
0.769504	3525.46	5.1998	133
0.926316	705.176	1.04008	63
0.686364	6133.55	9.04654	340
0.921053	490.166	0.722958	43
0.980263	9213.98	13.5899	82
0.744	334.055	0.492706	39
0.899281	634.999	0.936576	74
0.913043	1160.78	1.71206	82
0.87234	1100.13	1.62261	117
0.87234	341.194	0.503236	35
0.918478	1009.88	1.4895	113
0.86631	1678.07	2.47503	164
0.789272	846.636	1.24873	94
0.75576	987.654	1.45672	102
0.883721	584.578	0.862209	70
0.810707	2313.66	3.41248	250
0.904762	694.554	1.02442	39
0.866667	1708.78	2.52032	66
0.814241	5925.12	8.73912	227
0.825974	10350.9	15.2669	156
0.876847	1905.12	2.80992	105
0.918033	1134.11	1.67273	63
0.976744	352.656	0.520141	23
0.931973	600.876	0.886247	82
0.933673	855.481	1.26177	113
0.963415	937.001	1.38201	63
0.8	439.8	0.648673	43
0.762048	10318.3	15.2188	98
0.857143	968.489	1.42845	59
0.977273	572.654	0.844623	27
0.958042	542.173	0.799666	39
0.855556	4940.1	7.28629	156
0.985294	539.791	0.796152	43
0.966102	370.659	0.546695	31
0.821429	373.189	0.550427	43
0.87931	1141.87	1.68417	43
0.904762	1301.2	1.91918	90
0.896694	12563.2	18.5299	78
0.910714	1143.07	1.68595	55
0.785714	2473.34	3.64799	82
0.88	5227.49	7.71016	109
0.786047	2052.83	3.02777	74
0.935252	11708.5	17.2692	121
0.919075	3424.09	5.05029	70
0.938389	7773.24	11.465	86
0.895833	1840.38	2.71442	109
0.926108	2144.03	3.16229	145
0.945455	965.399	1.42389	43
0.921875	416.706	0.614611	55
0.953333	3689.39	5.44157	90
0.979167	945.142	1.39401	31
0.955975	4915.24	7.24962	51
0.891089	3211.93	4.73736	94
0.978723	520.49	0.767684	35
0.965517	2116.43	3.12158	78
0.950311	4220.74	6.22528	102
0.895349	2760.36	4.07133	172
0.909091	514.463	0.758795	35
0.94958	4269.44	6.29711	63
0.929412	1323.95	1.95273	47
0.953947	8711.26	12.8485	63
0.915584	1509.81	2.22685	113

## Sheet: 2. del CTD + 90 mer
del CTD 37						del CTD + 90mer
Solidity	Volume_nm^3	RNAP equivalents	Skeleton length			Solidity	Volume_nm^3	RNAP equivalents	Skeleton length
0.970297	1696.07	2.50158	66			0.95	654.942	0.965991	59
1	333.067	0.49125	39			0.989899	837.328	1.235	90
0.96	351.363	0.518235	35			0.969697	506.219	0.746635	35
0.847826	1709.64	2.52159	94			0.825243	1621.24	2.39121	180
0.917293	2317.49	3.41813	74			0.87013	488.88	0.721062	66
0.921569	2119.04	3.12543	90			0.827119	3929.94	5.79637	195
0.983871	884.028	1.30388	90			0.952381	838.482	1.2367	51
0.96875	647.179	0.954541	43			1	413.638	0.610086	35
0.985294	407.657	0.601264	39			0.858407	406.291	0.59925	78
0.915966	1377.39	2.03155	74			0.941176	1475.05	2.17559	39
0.833333	731.947	1.07957	102			0.98	376.475	0.555273	59
0.874251	2327.2	3.43244	94			1	455.465	0.671777	31
0.964072	1722.35	2.54034	82			0.876623	2415.74	3.56303	105
0.926316	3749.05	5.52957	102			0.969231	673.414	0.993236	63
0.921053	480.442	0.708617	51			0.95	442.749	0.653022	47
0.973684	1945.45	2.86939	63			0.958333	614.776	0.906749	35
0.929204	1627.56	2.40052	55			0.86747	384.299	0.566813	47
0.933333	548.97	0.80969	43			0.930693	964.855	1.42309	66
0.959459	4443.26	6.55348	82			0.772358	656.552	0.968366	105
0.905405	362.928	0.535292	51			0.92623	1838.4	2.71151	82
0.954338	9480.72	13.9834	133			1	690.385	1.01827	47
0.95	398.231	0.587361	39			0.955882	442.291	0.652347	47
0.985915	1255.9	1.85235	51			0.957143	689.291	1.01665	51
1	440.607	0.649863	39			0.9625	1116.16	1.64626	39
0.964286	576.12	0.849735	47			1	395.713	0.583647	31
0.941176	491.423	0.724813	63			0.920548	41884.2	61.776	164
0.984848	353.589	0.521518	39			0.918519	1992.38	2.93862	74
0.979167	1612.44	2.37823	66			0.848837	590	0.870207	78
0.903226	689.129	1.01641	63			0.914894	457.562	0.674871	43
0.963415	740.799	1.09262	63			0.922078	885.13	1.3055	70
0.9	1409.15	2.07839	121			0.783133	344.492	0.5081	74
1	486.125	0.716999	31			0.948718	397.87	0.586829	39
0.969231	492.909	0.727005	55			0.955224	720.33	1.06243	47
0.862816	10236	15.0974	262			1	402.305	0.59337	31
0.959732	2467.79	3.63981	59			0.575047	8318.06	12.2685	434
0.9875	638.909	0.942344	39			0.919355	3200.86	4.72103	117
0.952381	436.605	0.64396	39			0.880399	5217.82	7.69589	105
0.980769	398.839	0.588259	39			0.932203	350.36	0.516755	43
0.985915	508.359	0.749791	39			0.939394	1440.19	2.12417	156
0.746914	454.138	0.66982	98			0.958904	454.645	0.670568	51
0.944828	5765.71	8.504	39			0.969697	396.02	0.584101	47
0.836735	336.845	0.496821	63			0.808989	1076.25	1.58738	160
0.965517	363.608	0.536295	51			0.927536	798.903	1.17832	47
0.875	1365.42	2.0139	121			0.97619	365.94	0.539735	35
0.79878	1786.74	2.6353	211			0.975	365.133	0.538544	31
0.99115	2313.6	3.41238	70			0.947368	1034.91	1.52642	27
0.929825	471.349	0.695206	31			0.942029	428.984	0.63272	43
1	467.504	0.689534	35			0.95082	1026.2	1.51357	39
0.826484	1386.91	2.04559	117			0.967532	13621.6	20.0908	82
0.920792	565.16	0.83357	70			0.932773	713.222	1.05195	63
0.957983	1244.33	1.83529	78			0.9375	606.026	0.893844	43
0.971154	459.694	0.678015	63			0.926531	8180.44	12.0655	129
0.966942	2092.03	3.08558	82			0.958716	4714.03	6.95284	102
0.982759	390.756	0.576336	35			0.920455	581.16	0.857168	51
0.904762	3131.57	4.61883	98			0.873874	504.832	0.74459	78
0.913462	589.571	0.869574	55			0.907895	445.439	0.65699	59
0.907692	1242.99	1.83332	82			0.896104	3099.47	4.57149	121
0.853333	760.096	1.12109	70			0.897959	4346.78	6.41119	63
0.823151	1769.2	2.60944	141			0.964912	546.547	0.806117	39
0.826972	1888.4	2.78525	172			0.833333	407.369	0.600839	78
0.956522	924.779	1.36398	59			0.837736	3887.7	5.73407	141
0.921053	589.003	0.868735	70			0.955752	2284.15	3.36896	66
0.919192	520.893	0.768279	66			0.978723	349.165	0.514992	39
0.957895	1299.07	1.91603	63			0.819277	347.883	0.513102	74
0.948276	387.83	0.57202	47			0.95122	403.57	0.595237	35
0.944444	486.382	0.717378	47			0.896825	2631.53	3.88131	55
0.899038	1902.75	2.80642	102			0.900524	1599.6	2.35929	164
0.925234	446.36	0.658349	59			0.965517	3865.75	5.7017	47
0.856557	3611.36	5.32649	113			1	334.763	0.49375	31
0.955882	4520.53	6.66745	168			0.971014	510.609	0.753111	63
0.983607	343.809	0.507093	55			0.856436	4025.82	5.93779	121
0.749064	1185.84	1.74902	160			0.917808	405.454	0.598014	59
0.830882	4350.03	6.41597	195			0.962963	445.994	0.657809	47
0.908163	532.74	0.785753	47			0.671687	1376.44	2.03014	160
0.949367	596.592	0.879929	35			0.977778	344.596	0.508254	31
0.968421	991.202	1.46195	63			0.971014	1121.78	1.65455	59
0.485307	3341.05	4.9278	352			0.870748	1781.29	2.62727	82
0.85567	351.633	0.518633	63			0.839181	3992.57	5.88874	176
0.888889	1197.92	1.76685	113			0.894273	4120.36	6.07722	121
0.933702	777.282	1.14643	98			0.909836	2264.02	3.33926	78
0.897959	692.847	1.0219	51			0.858228	4188.64	6.17793	246
0.908163	792.967	1.16957	59			0.81383	22387.6	33.02	277
0.916667	398.78	0.588172	43			0.923077	458.611	0.676418	55
0.969697	693.983	1.02357	51			0.920792	858.823	1.2667	66
0.937107	1871.69	2.76061	90			0.854369	361.109	0.53261	59
0.927083	574.66	0.847581	55			0.95	368.392	0.543351	35
0.981818	342.558	0.505247	51			0.916667	3413.08	5.03403	78
0.943925	635.028	0.936619	70			0.957746	480.598	0.708846	39
0.96875	427.166	0.630038	27			0.922078	412.087	0.607798	51
0.893204	620.726	0.915525	74			0.906977	650.507	0.95945	55
0.74092	3336.34	4.92085	215			0.733945	1287.89	1.89954	121
0.90604	1570.18	2.3159	98			0.980392	333.325	0.491629	39
0.983051	426.196	0.628608	47			0.813953	559.824	0.825699	74
0.938931	547.397	0.807371	51			0.95	590.531	0.87099	31
0.886667	1788.54	2.63797	78			0.951351	5457.51	8.04942	109
0.963303	2182.73	3.21936	51			0.868217	2355.09	3.47358	70
0.96875	834.958	1.2315	55			0.953125	1045.83	1.54252	47
0.925532	342.613	0.505329	55			0.763889	1079	1.59144	152
0.968254	394.976	0.58256	47			1	972.099	1.43377	51
0.941176	414.939	0.612004	51			0.936508	790.203	1.16549	23
0.961538	379.883	0.5603	78			1	641.07	0.945531	27
0.91623	2930.87	4.32282	105			0.982759	411.97	0.607625	31
0.941799	3967.19	5.85131	109			0.803653	2238.39	3.30146	86
0.862245	12276.4	18.1067	234			0.953125	2281.06	3.36439	168
0.977011	1120.5	1.65265	59			0.92	502.309	0.740869	31
0.897436	4057.62	5.98469	90			0.953488	621.818	0.917135	39
0.972973	538.201	0.793806	51			0.859649	4387.11	6.47066	230
0.912371	2346.4	3.46076	94			0.942857	1245.38	1.83684	39
1	726.617	1.07171	47			0.886667	2901.67	4.27975	102
0.979592	1346.22	1.98558	74			1	883.645	1.30331	51
0.95082	494.719	0.729674	43			0.946429	356.967	0.526499	43
0.953488	516.042	0.761124	51			0.723849	1076.52	1.58778	137
0.841379	1720.76	2.53799	137			0.933333	761.588	1.12329	51
0.924812	583.942	0.861271	113			0.9375	478.194	0.705301	39
0.970588	768.383	1.13331	55			0.984375	447.389	0.659866	35
0.746398	1967.51	2.90193	195			0.988166	3302.07	4.87031	109
0.731707	1563.57	2.30616	180			0.761062	470.971	0.694647	82
0.884298	922.656	1.36085	66			0.918367	439.099	0.647638	31
0.922652	2879.25	4.24668	113			0.880597	1636.85	2.41424	90
0.965909	2886.43	4.25728	51			0.984127	3947.25	5.8219	43
0.980769	427.634	0.630729	31			0.911111	637.684	0.940536	55
0.759003	1841.25	2.71571	141			0.902655	1179.01	1.73895	70
0.909091	815.136	1.20227	90			0.843137	593.094	0.87477	74
0.980392	1967.43	2.90182	121			0.929688	1967.18	2.90145	74
0.970588	699.725	1.03204	70			1	448.207	0.661072	43
0.954286	3819.95	5.63415	117			0.989362	1653.11	2.43822	70
0.966981	1370.89	2.02196	105			0.681818	1990	2.93511	164
0.973451	555.466	0.819271	70			0.785425	13644	20.124	289
0.934066	410.273	0.605123	55			0.824742	480.807	0.709155	70
0.936709	368.674	0.543767	55			0.946746	3087.52	4.55387	94
0.95283	1121.3	1.65383	66			0.938272	430.028	0.63426	59
0.930233	358.346	0.528534	43			0.967391	4045.72	5.96713	102
0.769821	5543.53	8.17629	113			0.873684	438.918	0.647371	55
0.82659	793.859	1.17088	78			0.667857	1260.14	1.85861	152
0.942857	419.495	0.618725	35			0.578512	1147.64	1.69268	250
0.771513	1699.31	2.50636	133			1	505.303	0.745284	39
0.980769	338.201	0.498822	31			0.923954	2584.22	3.81153	137
0.920455	487.136	0.71849	39			1	356.84	0.526313	39
0.773006	2274.67	3.35498	156			0.934783	468.726	0.691336	43
0.93617	1369.49	2.0199	74			0.981818	634.969	0.936532	66
0.834395	746.256	1.10067	66			1	378.091	0.557657	20
0.878049	352.491	0.519898	59			0.929577	4028.5	5.94174	137
0.942857	419.685	0.619004	39			0.882979	3712.64	5.47586	145
0.95082	1945.67	2.86973	55			0.916667	3461.72	5.10578	105
0.967742	773.665	1.1411	39			0.946429	517.857	0.763801	47
1	422.356	0.622944	51			0.852601	8347.87	12.3125	215
0.974359	377.185	0.556321	31			0.980392	369.079	0.544364	31
0.960526	448.152	0.66099	31			1	470.48	0.693923	31
0.953125	408.373	0.60232	51			0.953488	335.886	0.495408	39
0.957895	386.189	0.569601	43			0.934959	1436.85	2.11924	82
0.723592	2655.32	3.9164	230			0.897059	469.954	0.693147	55
0.926267	3545.87	5.22989	121			0.727679	855.111	1.26123	137
0.892857	651.989	0.961636	82			0.957143	3309.14	4.88073	70
0.748837	885.739	1.3064	125			0.985507	596.761	0.880179	47
0.886297	4555.53	6.71907	164			0.985714	1525.18	2.24953	47
0.985294	1221.72	1.80194	51			0.934426	421.419	0.621561	39
0.970149	388.816	0.573476	35			0.932836	1361.33	2.00786	59
0.925532	1200	1.76991	90			0.904255	583.73	0.860958	55
0.949153	577.681	0.852037	66			0.974359	339.308	0.500454	27
0.950617	427.408	0.630396	31			0.944444	1790.71	2.64116	63
0.880734	436.728	0.644141	70			0.959184	379.714	0.56005	47
0.858108	581.454	0.857602	82			0.611987	1123.29	1.65677	168
0.988372	905.91	1.33615	39			0.676923	1684.82	2.48498	301
0.848168	856.262	1.26292	117			0.857143	1571.67	2.3181	63
0.874636	3211.73	4.73707	176			0.97561	407.642	0.601242	20
1	367.887	0.542607	27			0.870968	3658.37	5.39582	117
0.957447	777.016	1.14604	43			0.91954	516.743	0.762158	59
0.978723	1897.26	2.79832	82			0.984375	719.826	1.06169	35
0.962428	8086.93	11.9276	109			0.985075	350.182	0.516493	39
0.941176	4608.16	6.7967	109			0.927273	509.872	0.752024	47
0.944	1054.22	1.5549	74			0.885057	845.609	1.24721	82
0.956522	528.227	0.779096	39			0.952756	1669.71	2.4627	70
0.97	343.892	0.507215	39			0.918919	882.365	1.30142	78
0.923313	5194.79	7.66194	160			0.911392	781.41	1.15252	43
0.948454	520.674	0.767955	59			0.980769	499.511	0.736742	35
0.974359	346.569	0.511164	23			0.924603	3535.23	5.2142	156
0.973684	789.83	1.16494	55			0.940741	1749.16	2.57988	86
0.940639	2335.12	3.44413	121			0.978261	381.521	0.562715	35
0.966102	337.731	0.498128	39			0.977778	363.207	0.535703	35
0.862069	619.524	0.913752	70			0.910828	2019.88	2.97917	66
0.954545	901.314	1.32937	59			0.965517	386.577	0.570173	47
0.94697	556.976	0.821498	74			0.952381	551.943	0.814075	31
0.958678	1782.2	2.62862	66			0.938596	2894.52	4.2692	74
0.911111	1065.27	1.5712	74			0.883721	500.4	0.738053	55
0.784661	1547.22	2.28204	145			0.886076	722.577	1.06575	47
						0.864	1204.93	1.77718	82
						0.962567	3172.21	4.67877	90
						0.950495	1446.45	2.1334	55
						0.85443	1264.07	1.86441	74
						0.693878	457.237	0.67439	141
						0.96	1445.54	2.13206	47
						0.955357	4167.18	6.14628	82
						0.944444	475.997	0.70206	23
						0.922414	2845.32	4.19664	102
						0.821678	2106.35	3.10671	145
						0.930769	1005.97	1.48374	47
						0.963855	1214.03	1.79061	39
						0.829787	343.674	0.506894	74
						0.765854	2654.78	3.9156	113
						0.962025	806.46	1.18947	43
						1	436.627	0.643992	23
						0.960784	1349.92	1.99104	55
						0.926829	828.443	1.22189	70
						0.828947	435.751	0.642701	51
						0.951807	2901.51	4.27951	109
						0.966292	979.08	1.44407	43
						0.891473	2558.34	3.77337	82
						0.887324	715.84	1.05581	51
						0.876543	3955.99	5.83479	145
						0.94	393.174	0.579902	35
						0.938776	353.26	0.521032	43
						0.841026	1562.45	2.3045	141
						0.978261	353.037	0.520704	43
						0.947368	424.311	0.625827	35
						0.869231	1555.55	2.29433	90
						0.711055	1762.89	2.60013	195
						0.965517	2425.94	3.57809	35
						0.94958	1500.4	2.21299	63
						0.839465	4283.17	6.31736	172
						0.790698	448.486	0.661484	117
						0.95082	694.768	1.02473	55
						0.926471	341.751	0.504058	39
						0.973684	368.114	0.542941	39
						0.930233	1129.83	1.66642	59
						0.863436	2122.16	3.13003	156
						0.927273	399.268	0.588891	63
						0.962963	567.422	0.836905	23
						0.817308	562.767	0.83004	66
						0.956989	488.212	0.720077	47
						0.978261	438.035	0.646069	39
						0.84	354.924	0.523487	63
						0.90566	1244.97	1.83625	74
						0.961783	2730.35	4.02707	109
						0.955882	348.536	0.514066	47
						0.883117	513.442	0.757289	59
						0.934783	414.94	0.612007	35
						1	447.692	0.660312	39
						0.862903	913.794	1.34778	90
						0.888889	362.55	0.534734	23
						0.878261	521.708	0.769481	78
						0.809339	884.92	1.30519	176
						0.813559	1512.31	2.23054	98
						1	397.446	0.586204	39
						0.982759	487.996	0.719758	43
						0.976744	354.576	0.522973	31
						0.902655	702.329	1.03588	105
						0.673333	1062.18	1.56664	215
						0.972973	548.521	0.809028	39
						0.929412	1392.41	2.0537	90
						1	338.911	0.499868	35
						0.905405	1384.58	2.04216	90
						0.912281	487.52	0.719056	43
						1	653.338	0.963626	51
						0.84898	4832.63	7.12778	180
						0.936508	587.986	0.867236	55
						1	367.001	0.541299	47
						0.895105	2017.09	2.97505	113
						0.802778	4341.76	6.40378	262
						0.913793	489.882	0.722539	43
						1	517.581	0.763394	43
						0.512987	1837.23	2.70978	219
						0.928994	7561.1	11.1521	109
						0.721739	407.595	0.601172	98
						0.984848	733.873	1.08241	66
						0.953488	2340.28	3.45174	39
						0.872483	1116.53	1.6468	98
						0.843972	1521.06	2.24346	113
						0.941176	387.64	0.57174	51
						0.94	585.045	0.862898	43
						0.955882	1193.24	1.75994	51
						0.92562	1239.88	1.82874	117
						0.943662	407.619	0.601208	51
						0.919355	599.697	0.884509	51
						0.863248	849.004	1.25222	98
						0.915254	355.009	0.523612	55
						0.917722	4081.71	6.02023	117
						0.892473	995.034	1.4676	66
						0.978723	1632.62	2.408	47
						0.970588	416.068	0.613669	20
						0.95614	769.733	1.1353	82
						0.96	766.065	1.12989	51
						1	353.904	0.521982	31
						0.984848	376.671	0.555562	70
						0.945652	848.755	1.25185	63
						0.796992	1764.24	2.60212	199
						0.974359	420.731	0.620547	31
						0.773663	1021.73	1.50698	141
						0.87	919.224	1.35579	78
						0.934211	705.011	1.03984	51
						0.783333	2398.59	3.53774	195
						0.957746	735.078	1.08419	43
						0.97561	355.294	0.524032	39
						0.837398	1614.01	2.38054	98
						0.930693	1084.03	1.59887	59
						0.836449	1638.75	2.41704	133
						0.979592	1263.67	1.86382	66
						0.924051	470.769	0.694349	43
						0.944444	360.039	0.53103	43
						0.885366	2067.63	3.0496	191
						0.895349	693.077	1.02224	82
						0.934066	4409.92	6.5043	137
						0.961783	1308.33	1.92969	66
						0.952218	1035.05	1.52663	125

## Sheet: 2. del DBD del CTD + 90 mer
del DBD del CTD 37						del DBD del CTD + 90 mer
Solidity	Volume_nm^3	RNAP equivalents	Skeleton length			Solidity	Volume_nm^3	RNAP equivalents	Skeleton length
0.972973	371.51	0.54795	31			0.907692	337.055	0.497132	47
1	1668.71	2.46122	39			0.943662	801.526	1.18219	35
0.864662	1494.26	2.20393	82			0.978723	396.878	0.585366	43
1	558.818	0.824215	35			0.895238	847.227	1.2496	74
0.915966	1213.03	1.78913	70			0.70354	506.289	0.746738	113
0.880542	25855	38.1342	500			0.788889	2823.19	4.16399	121
1	620.379	0.915013	55			0.974359	468.405	0.690863	35
0.893186	52409	77.2994	371			0.848485	2761.92	4.07363	148
0.984848	672.043	0.991213	43			0.984375	1022.86	1.50865	43
0.805031	2582.07	3.80836	78			0.841584	339.483	0.500713	63
0.87	744.004	1.09735	55			0.960784	401.91	0.592787	39
0.788235	1235.38	1.82209	121			1	535.894	0.790405	35
0.953488	423.621	0.624809	35			1	333.42	0.491769	20
0.962963	772.605	1.13954	27			0.938776	550.939	0.812594	43
0.933333	446.586	0.658682	35			0.986486	1402.22	2.06818	47
0.990566	1024.36	1.51085	55			0.933333	397.775	0.586689	31
0.988235	1011.5	1.49189	55			0.944444	400.109	0.590132	47
0.981132	536.844	0.791805	39			0.977273	442.454	0.652586	31
0.95	3373.86	4.9762	66			0.976744	438.096	0.64616	35
0.917293	2916.05	4.30096	86			0.974359	1398.95	2.06334	47
1	707.491	1.0435	35			0.961538	339.286	0.500421	35
0.9	4406.21	6.49884	160			1	2457.42	3.62451	43
0.885246	328.734	0.484859	31			0.876894	14391	21.2256	195
0.963964	1899	2.80089	82			0.893939	289.384	0.426821	35
0.930556	542.821	0.800621	31			0.938462	280.193	0.413265	27
0.95858	21659.1	31.9455	156			0.849462	429.586	0.633608	63
0.821293	3883.9	5.72846	63			0.953125	524.316	0.773328	39
0.904762	789.825	1.16493	59			0.987952	1908.08	2.81427	59
1	406.101	0.598969	35			0.928571	445.575	0.65719	35
1	312.906	0.461513	31			0.793893	527.905	0.77862	63
0.925926	1130.93	1.66804	74			0.968085	433.699	0.639673	59
0.988095	1262.49	1.86208	63			0.884354	2010.93	2.96598	51
0.964286	280.856	0.414242	23			0.983051	342.008	0.504437	35
0.849462	585.412	0.863439	105			0.801887	592.502	0.873897	70
0.84375	463.732	0.683971	63			0.972222	353.483	0.521361	16
0.956332	1805.48	2.66294	113			0.911765	305.63	0.450782	55
0.946429	1117.92	1.64885	43			0.90411	305.439	0.4505	47
1	340.381	0.502037	23			0.919192	1351.9	1.99395	59
0.967742	321.747	0.474553	31			0.931818	333.275	0.491556	27
0.941176	442.975	0.653355	27			0.940299	717.716	1.05858	39
0.912409	4792.77	7.06898	94			1	413.064	0.609239	27
0.804665	7116.84	10.4968	133			0.95283	1828.25	2.69654	59
1	2926.84	4.31687	43			0.978261	824.573	1.21618	31
0.967742	330.444	0.48738	23			0.977273	1636.15	2.4132	43
0.977778	582.442	0.85906	35			0.860465	444.014	0.654888	55
0.958333	299.384	0.441569	27			0.542083	2263.96	3.33918	367
0.979592	715.988	1.05603	43			0.844444	3353.62	4.94634	133
0.936709	1711.94	2.52498	55			0.9375	291.326	0.429684	35
0.967213	923.591	1.36223	39			0.95082	290.573	0.428573	23
1	438.063	0.646111	31			0.955224	319.365	0.471041	27
0.818462	12186.5	17.9742	117			0.9375	364.462	0.537554	43
0.972222	424.053	0.625447	27			0.907895	697.288	1.02845	59
0.964706	1804.13	2.66095	39			0.908046	437.642	0.64549	55
0.974359	569.157	0.839464	39			0.930556	273.627	0.40358	39
0.964286	536.928	0.79193	31			0.914286	357.196	0.526837	43
0.95	466.205	0.687618	23			0.94186	317.561	0.468379	35
0.984615	1111.89	1.63996	47			0.973333	736.368	1.08609	47
0.895349	721.867	1.0647	63			1	317.937	0.468934	27
0.96875	404.2	0.596165	27			0.905405	471.624	0.695611	47
0.97561	588.938	0.868641	35			0.979167	350.78	0.517374	35
0.937888	21199.2	31.2673	133			0.962963	333.982	0.492599	35
0.953488	487.664	0.719269	35			0.956522	983.965	1.45128	51
0.961538	343.644	0.506849	27			1	428.383	0.631833	27
0.972222	493.88	0.728437	27			0.836207	1240.9	1.83024	94
0.930233	334.215	0.492943	31			0.978723	399.462	0.589177	27
0.948276	3056.9	4.5087	51			0.892857	611.434	0.90182	43
0.95	758.197	1.11828	31			0.959184	319.298	0.470941	27
0.956522	2320.95	3.42323	39			1	274.918	0.405483	23
1	503.674	0.742883	23			0.921053	294.804	0.434814	27
0.910615	5296.64	7.81216	86			0.984615	512.698	0.756192	43
0.944444	357.352	0.527068	31			0.931034	282.664	0.416908	27
0.891117	19225.1	28.3556	141			0.896797	4020.76	5.93032	121
0.98	616.255	0.908931	31			0.964286	363.402	0.535991	39
0.914286	5904.45	8.70862	78			0.894737	373.177	0.550409	39
0.952941	2582.13	3.80846	47			0.904762	1277.43	1.88411	51
0.967742	411.169	0.606444	31			0.96	754.868	1.11337	31
0.977778	461.609	0.680839	23			0.948276	607.686	0.896291	35
0.974359	566.349	0.835323	31			0.899083	964.109	1.42199	35
0.970588	418.554	0.617336	31			0.967742	292.274	0.431082	35
0.975904	1462.48	2.15705	55			0.922078	694.835	1.02483	35
1	506.738	0.747401	27			0.931507	282.61	0.416829	39
0.675758	3270.56	4.82384	164			0.985507	843.414	1.24397	47
0.921569	550.024	0.811244	43			0.947368	459.866	0.678269	47
0.96875	542.014	0.799431	27			0.985915	924.643	1.36378	39
0.947115	5958.38	8.78818	117			0.847328	9109.6	13.436	148
0.960526	2070.8	3.05428	39			0.824449	17366.7	25.6146	504
0.866667	1567.56	2.31204	125			1	548.032	0.808307	31
1	2091.61	3.08497	35			0.902913	430.448	0.634879	47
1	416.495	0.614299	23			0.961538	2001.23	2.95167	66
0.939394	602.012	0.887923	39			0.86722	2793.76	4.1206	105
0.956522	475.373	0.70114	51			0.945946	301.163	0.444193	31
0.981132	629.887	0.929036	31			0.959184	322.835	0.476158	31
0.930233	368.504	0.543516	27			0.977778	321.339	0.473951	27
1	1046.49	1.5435	35			0.963636	441.781	0.651595	39
1	474.961	0.700532	43			0.930233	1182.46	1.74404	55
0.897079	15060.1	22.2125	410			0.983871	788.552	1.16306	39
0.901235	523.675	0.772382	59			0.913793	555.728	0.819658	27
1	307.953	0.454208	20			0.669421	1653.72	2.43912	164
0.862069	609.273	0.898633	51			0.949275	1306.33	1.92674	55
0.971014	1688.88	2.49097	39			0.817927	4674.18	6.89407	180
1	490.945	0.724107	27			0.971429	338.473	0.499223	23
0.893023	3006.98	4.43507	98			0.980769	407.675	0.601291	43
0.953488	343.35	0.506417	43			0.972727	3573.75	5.27101	51
0.939189	2110.19	3.11238	78			0.958333	794.815	1.17229	43
0.973684	298.648	0.440484	23			0.969231	333.909	0.492492	27
0.989011	1826.6	2.6941	74			0.961832	2360.11	3.48098	51
1	709.283	1.04614	31			0.718954	1168.62	1.72363	156
0.927536	1698.5	2.50516	39			0.963636	290.707	0.428771	47
0.973684	913.666	1.34759	31			0.981818	283.101	0.417553	35
0.941176	1281.21	1.88969	43			0.843662	28685.8	42.3094	207
1	308.907	0.455616	31			0.953271	1448.79	2.13686	59
0.972603	1774.52	2.61729	43			0.923077	479.858	0.707756	35
0.962025	1554.16	2.29227	55			0.985714	877.148	1.29373	35
0.978723	578.34	0.853009	31			0.895349	337.477	0.497754	39
0.983871	832.929	1.22851	39			0.914729	2137.67	3.1529	70
0.952381	364.24	0.537227	39			0.921053	331.342	0.488706	47
0.958763	1766.53	2.6055	70			0.980392	313.636	0.462591	20
0.979592	879.911	1.2978	59			0.970588	1140.8	1.68259	40
0.992366	5146.9	7.5913	55			0.971014	875.834	1.29179	43
0.980769	1115.38	1.64511	39			0.967213	502.52	0.741179	43
0.792	8157.44	12.0316	273			0.971831	407.826	0.601514	31
0.972222	2547	3.75664	43			0.962264	464.272	0.684767	43
1	365.094	0.538487	31			0.933333	384.489	0.567092	39
0.905983	8856.04	13.062	223			0.950549	3455.38	5.09643	82
0.972973	370.74	0.546814	16			0.954545	1513.88	2.23286	66
0.903226	2238.25	3.30126	86			0.965517	2836.85	4.18414	43
0.793241	7336.97	10.8215	293			0.969697	274.511	0.404883	27
0.938462	2255.64	3.3269	86			0.979167	307.652	0.453765	27
0.916667	477.868	0.70482	31			0.935897	479.528	0.707269	35
0.982143	571.293	0.842615	31			0.92607	6000.58	8.85041	94
0.96	1385.64	2.04372	47			0.851562	1169.18	1.72446	74
0.955556	580.652	0.856418	39			0.933333	454.155	0.669845	51
0.737778	735.905	1.08541	35			0.94	416.489	0.614291	31
0.824295	9845.5	14.5214	270			0.888889	308.335	0.454771	39
0.7875	668.35	0.985766	105			0.956522	1195.3	1.76298	39
0.97619	2163.57	3.19111	47			0.651663	1935.04	2.85405	234
1	574.607	0.847503	16			0.967213	323.929	0.477772	35
0.876812	11346.9	16.7359	254			0.923913	441.395	0.651025	47
0.976744	376.49	0.555295	31			1	465.07	0.685944	27
0.95098	1743.07	2.5709	43			0.787234	1052.35	1.55214	199
0.979592	6763.75	9.97604	82			0.932432	633.561	0.934456	39
0.988764	3227.1	4.75974	55			0.960784	384.14	0.566578	27
0.976744	6759.37	9.96957	82			0.946602	3302.63	4.87114	90
0.934579	4052.41	5.977	133			0.802198	278.326	0.41051	47
0.980392	699.271	1.03137	39			0.944444	1055.17	1.5563	63
0.937343	14121.9	20.8288	203			1	375.562	0.553926	35
0.940299	1015.9	1.49838	70			0.890909	353.131	0.520842	35
0.978261	3002.64	4.42867	55			0.967213	386.777	0.570467	39
0.964286	709.703	1.04676	39			0.984615	471.186	0.694965	23
0.967742	631.73	0.931755	39			0.967742	716.251	1.05642	35
0.964286	422.431	0.623054	27			0.956522	456.666	0.673549	31
0.956989	1964.87	2.89804	66			0.96875	320.297	0.472415	31
0.92	562.992	0.830372	43			0.755725	847.966	1.25069	70
0.958333	289.159	0.426488	27			0.940397	4509.22	6.65076	63
0.977273	381.977	0.563387	23			0.985075	371.432	0.547834	47
1	834.396	1.23067	39			0.95	459.513	0.677747	35
1	464.766	0.685496	27			0.966102	320.533	0.472762	47
1	1047.16	1.54449	39			0.932331	820.493	1.21017	74
0.952381	5650.31	8.33379	125			0.984615	659.318	0.972446	39
0.984615	1283.22	1.89266	47			0.934211	362.12	0.5341	47
0.954545	2176.07	3.20955	70			0.944444	287.62	0.424219	31
0.954545	386.779	0.57047	27			0.947368	429.791	0.633911	43
0.965116	1760.55	2.59669	55			0.871166	16166.6	23.8445	223
0.959459	1089.91	1.60754	51			0.94152	2117.75	3.12353	78
1	560.184	0.82623	31			0.982143	743.894	1.09719	20
1	555.499	0.81932	27			0.957895	1414.85	2.0868	35
0.967742	702.18	1.03566	35			0.954545	294.062	0.433719	23
0.967742	477.997	0.70501	23			0.960784	449.959	0.663657	47
0.955556	689.363	1.01676	23			0.922581	1069.58	1.57755	70
0.977778	378.667	0.558505	31			0.904762	336.796	0.49675	63
0.949367	761.415	1.12303	55			0.885827	1304.58	1.92416	133
1	371.326	0.547679	31			0.980583	684.858	1.01011	51
0.969697	317.959	0.468966	31			0.983051	421.936	0.622325	31
0.90625	1660.82	2.44959	39			0.958333	322.49	0.475649	47
0.980769	848.766	1.25187	39			0.967213	284.558	0.419702	31
0.951613	347.814	0.513	55			0.945736	1459.28	2.15234	70
0.860759	866.971	1.27872	66			0.986667	1912.63	2.82099	55
0.977273	673.435	0.993268	31			0.941038	25590.7	37.7444	219
0.931818	557.666	0.822516	35			1	508.907	0.750601	27
0.947368	441.433	0.651082	39			0.957143	474.739	0.700204	35
0.96	621.325	0.916409	27			0.865	1272.78	1.87725	98
1	313.15	0.461873	27			0.986667	757.871	1.1178	35
1	586.771	0.865445	31			0.934783	391.74	0.577788	55
0.967742	409.207	0.603549	31			0.953846	518.842	0.765253	35
0.934426	3873.62	5.7133	70			0.952381	467.636	0.689729	35
0.93617	697.404	1.02862	16			0.968254	1220.81	1.8006	47
1	364.979	0.538317	39			0.932432	546.624	0.80623	43
0.928571	523.306	0.771838	47			0.834783	1872.03	2.76111	102
0.914894	315.49	0.465324	35			0.979167	568.755	0.838871	31
0.979592	297.349	0.438567	23			0.968085	1797.23	2.65079	47
0.933333	311.505	0.459448	27			0.987179	2062.16	3.04154	39
0.909091	779.685	1.14998	43			0.825301	3222.53	4.75299	203
0.942857	327.253	0.482674	27			0.971429	353.535	0.521439	55
0.973684	614.249	0.905972	20			0.804878	2885.38	4.25572	148
0.981132	469.186	0.692015	27			0.954128	2511.06	3.70363	66
0.972973	483.163	0.712629	27			0.953488	444.688	0.655882	39
0.966667	504.262	0.74375	27			0.954545	467.509	0.689542	43
0.948529	7050.21	10.3985	63			1	313.943	0.463043	43
0.975806	15649.5	23.0819	137			0.981132	723.823	1.06758	39
0.956522	491.155	0.724418	47			0.98	660.497	0.974184	47
0.963964	4049.94	5.97337	59			0.97037	2246.55	3.3135	70
0.973684	406.946	0.600215	31			0.883721	1420.67	2.09538	90
1	284.46	0.419557	27			0.971014	713.898	1.05295	59
0.96875	428.587	0.632134	27			0.939024	453.378	0.668699	47
0.96875	444.748	0.65597	23			0.935065	426.756	0.629434	55
0.972222	975.875	1.43934	51			0.974684	366.446	0.540481	47
0.925926	466.674	0.68831	31			0.819905	967.071	1.42636	121
0.982143	281.63	0.415383	20			0.986111	426.346	0.62883	43
0.96	461.355	0.680465	35			0.849558	529.785	0.781393	78
0.974684	1051.41	1.55076	55			1	442.272	0.652318	43
0.977011	3151.48	4.64821	55			0.982759	717.871	1.05881	43
0.893805	1116.14	1.64623	78			0.979167	341.283	0.503367	39
0.972222	466.479	0.688023	35			0.981818	459.58	0.677846	47
0.940299	8453.29	12.468	86			0.706093	736.492	1.08627	156
1	403.84	0.595634	39			0.887446	4800.33	7.08014	109
0.946429	1123.26	1.65672	78			0.96875	324.032	0.477923	47
0.973684	546.148	0.805529	23			0.978495	720.904	1.06328	66
0.952381	1605.11	2.36742	39			0.978261	383.709	0.565943	31
0.953488	534.599	0.788494	23			0.683844	11540.2	17.021	238
0.971429	401.504	0.592188	27			0.975309	1261.65	1.86084	51
0.973684	424.019	0.625396	35			0.909677	4764.18	7.02681	172
0.869048	726.686	1.07181	43			0.963636	694.882	1.0249	47
0.947368	478.095	0.705155	35			0.86631	648.1	0.9559	86
1	415.425	0.612721	27			0.934066	757.448	1.11718	70
0.948718	416.099	0.613716	31			1	354.461	0.522804	35
0.976744	2293.73	3.38308	39			0.967742	580.263	0.855845	35
0.926829	319.543	0.471303	23			0.933333	303.727	0.447975	43
1	616.558	0.909378	23			0.942529	647.058	0.954362	39
						0.909091	364.226	0.537207	35
						0.95	507.076	0.747899	39
						0.679856	879.287	1.29688	109
						0.669492	1126.55	1.66158	145
						0.978022	846.238	1.24814	51
						0.881148	1657.48	2.44466	129
