# Supplementary material for: Role of BRCA2 DNA-binding and C-terminal domain in its mobility and conformation in DNA repair
Source: eLife. 2021 Jul 13;10:e67926. doi: 10.7554/eLife.67926 (PMC8324294; doi:10.7554/eLife.67926)
Supplement: Figure 2—source data 1. [file elife-67926-fig2-data1.xlsx]

## Sheet: Figure 2B-C
	Figure 2B-C (BRCA2 foci quantification)
	Number of EdU+ cells analyzed
				N
		noIR	WT	466
		noIR	dDBD	528
		noIR	dCTD	514
		noIR	dDBDdCTD	516
		2h	WT	477
		2h	dDBD	502
		2h	dCTD	504
		2h	dDBDdCTD	420
	Foci counts (Figure 2B)
	Comparing variants at different time points (Figure 2D)							Comparing time point for different variants
	Wilcoxon rank sum test with continuity correction (using R)							Wilcoxon rank sum test with continuity correction (using R)
mean foci number	no IR	dDBD	dCTD	dDBDdCTD				WT	2h
9.68	WT	3.0246e-05	0.000181964	9.4042e-09		p<0.005		no IR	9.67894e-29
11.6	dDBD		2.99745e-17	3.42128e-24		0.005<p<0.05
7.94	dCTD			0.00608425		p>0.05
7.22	dDBDdCTD							dDBD	no IR
								no IR	0.0103963
								dCTD	no IR
	2 hours	dDBD	dCTD	dDBDdCTD				no IR	1.16789e-27
16.8	WT	3.98899e-09	9.07015e-06	7.09945e-05
12.8	dDBD		0.223238	0.0818278
13.9	dCTD			0.601963				dDBDdCTD	no IR
13.9	dDBDdCTD							no IR	3.32187e-38
	Foci intensity (Figure 2C)
	Comparing variants at different time points (Figure 2D)							Comparing time point for different variants
	no IR	dDBD	dCTD	dDBDdCTD				WT	2h
	WT	3.72418e-150	1.46034e-85	1.46729e-102				no IR	1.20415e-26
	dDBD		5.21449e-05	0.222716
	dCTD			0.0149622
	dDBDdCTD							dDBD	no IR
								no IR	1.93394e-18
								dCTD	no IR
	2 hours	dDBD	dCTD	dDBDdCTD				no IR	0.0881334
	WT	7.1952e-216	8.79479e-75	7.09945e-05
	dDBD		1.68988e-32	0.198938
	dCTD			1.01972e-25				dDBDdCTD	no IR
	dDBDdCTD							no IR	2.63067e-14

## Sheet: Figure 2D-G
Figure 2D-G (RAD51 foci quantification)
Number of EdU+ cells analyzed			N
1	no IR	WT	358
2	no IR	dDBD	299
3	no IR	dCTD	370
4	no IR	dDBDdCTD	258
5	2h	WT	263
6	2h	dDBD	404
7	2h	dCTD	318
8	2h	dDBDdCTD	216
9	8h	WT	163
10	8h	dDBD	102
11	8h	dCTD	155
12	8h	dDBDdCTD	116
13	24h	WT	310
14	24h	dDBD	228
15	24h	dCTD	288
16	24h	dDBDdCTD	186
	Foci counts (Figure 2D-E)
	Comparing variants at different time points (Figure 2D)								Comparing time point for different variants
	Wilcoxon rank sum test with continuity correction (using R)								Wilcoxon rank sum test with continuity correction (using R)
mean foci number	no IR	dDBD	dCTD	dDBDdCTD					WT	2h	8h	24h
18.35	WT	1.99766e-08	0.665651	1.70659e-07		p<0.005			no IR	1.08927e-32	2.22407e-10	3.54334e-07
22.78	dDBD		7.51474e-10	0.665651		0.005<p<0.05			2h		1.41704e-08	6.87994e-17
17.59	dCTD			7.53749e-09		p>0.05			8h			0.0324369
22.5
	2 hours	dDBD	dCTD	dDBDdCTD					dDBD	2h	8h	24h
36.61	WT	5.22946e-08	5.00656e-08	0.0106156					no IR	2.9855e-11	1.6643e-07	4.64886e-07
29.05	dDBD		0.193701	0.00576965					2h		0.279649	0.815563
27.99	dCTD			0.000648198					8h			0.279649
32.59
	8 hours	dDBD	dCTD	dDBDdCTD					dCTD	2h	8h	24h
26.45	WT	0.0151933	0.478968	0.170458					no IR	6.76545e-18	5.7008e-09	0.000252872
31.81	dDBD		0.00450011	0.304138					2h		0.0682531	8.06104e-06
25.08	dCTD			0.523657					8h			0.0211662
28.9
	24 hours	dDBD	dCTD	dDBDdCTD					dDBDdCTD	2h	8h	24h
23.73	WT	9.83726e-06	0.109725	0.109725					no IR	8.63997e-16	7.56323e-05	0.0645225
30.18	dDBD		3.72414e-08	0.0412403					2h		0.0406284	8.8143e-05
21.92	dCTD			0.00869632					8h			0.128731
27.16
	p-value < 2.2e-16
	Foci Intensity (Figure 2F-G)
	no IR	dDBD	dCTD	dDBDdCTD					WT	2h	8h	24h
	WT	8.44734e-09	2.05058e-50	2.70528e-72					no IR	0	8.03089e-104	0.0133552
	dDBD		1.65499e-92	2.12086e-128					2h		2.54507e-83	0
	dCTD			0.00494956					8h			9.88495e-74
	2 hours	dDBD	dCTD	dDBDdCTD					dDBD	2h	8h	24h
	WT	0	0	0					no IR	2.16248e-31	2.60146e-125	0.000111257
	dDBD		2.70529e-57	1.70468e-85					2h		3.71152e-69	3.35807e-09
	dCTD			1.75863e-06					8h			2.4124e-78
	8 hours	dDBD	dCTD	dDBDdCTD
	WT	2.39697e-06	1.34754e-19	3.14115e-21					dCTD	2h	8h	24h
	dDBD		1.76709e-43	3.04816e-46					no IR	1.46256e-91	6.14871e-113	3.44549e-19
	dCTD			0.586901					2h		8.32528e-20	2.35184e-06
									8h			2.60753e-29
	24 hours	dDBD	dCTD	dDBDdCTD
	WT	4.47406e-06	4.54374e-06	5.79471e-90
	dDBD		7.6467e-17	7.7645e-136					dDBDdCTD	2h	8h	24h
	dCTD			3.08392e-45					no IR	2.83429e-75	3.77426e-135	1.58888e-07
									2h		9.49665e-33	1.50053e-87
									8h			3.06683e-136

## Sheet: Description of source data
The tabs "BRCA2_Source data" and "RAD51_Source data" contain the data from Figure 2B-C and Figure2D-G, respectively
This source data is the output from the CellProfiler projects as available at www.github.com/maartenpaul/DBD_foci
Every row represents one segmented, analyzed nucleus

## Sheet: BRCA2_Source data
ImageNumber	ObjectNumber	Metadata_condition	Metadata_date	Metadata_position	Metadata_protein	experiment	condition	Children_BRCA2_Count	Intensity_IntegratedIntensity_BRCA2	Intensity_IntegratedIntensity_DAPI	Intensity_IntegratedIntensity_EdU
1	1	2hIR	190725	1	WT	exp1	2h	36	962.428	2111.34	1974.43
1	2	2hIR	190725	1	WT	exp1	2h	10	456.661	1647.01	1748.62
1	3	2hIR	190725	1	WT	exp1	2h	26	1193.37	3311.01	190.377
1	4	2hIR	190725	1	WT	exp1	2h	5	426.72	1100.69	943.995
1	5	2hIR	190725	1	WT	exp1	2h	1	190.864	611.46	44.2059
1	6	2hIR	190725	1	WT	exp1	2h	1	756.134	1532.94	1564.9
1	7	2hIR	190725	1	WT	exp1	2h	29	1001.39	2617.41	2141.38
1	8	2hIR	190725	1	WT	exp1	2h	20	980.668	3453.91	204.565
1	9	2hIR	190725	1	WT	exp1	2h	27	738.399	2557.62	1919.1
1	10	2hIR	190725	1	WT	exp1	2h	15	906.791	2079.04	2264.2
1	11	2hIR	190725	1	WT	exp1	2h	20	1153.8	3686.42	230.204
1	12	2hIR	190725	1	WT	exp1	2h	11	428.729	1530.49	1240.93
1	13	2hIR	190725	1	WT	exp1	2h	16	915.338	2418.64	1063.79
1	14	2hIR	190725	1	WT	exp1	2h	32	963.977	2924.04	2103.65
1	15	2hIR	190725	1	WT	exp1	2h	11	991.132	3042.86	2033.6
1	16	2hIR	190725	1	WT	exp1	2h	20	972.89	3176.37	854.58
1	17	2hIR	190725	1	WT	exp1	2h	17	861.414	2269.66	1902.05
1	18	2hIR	190725	1	WT	exp1	2h	31	1266.54	3725.1	2470.58
1	19	2hIR	190725	1	WT	exp1	2h	15	686.963	3221.34	732.068
1	20	2hIR	190725	1	WT	exp1	2h	14	534.611	2563.99	396.304
1	21	2hIR	190725	1	WT	exp1	2h	18	988.593	3080.27	1893.94
1	22	2hIR	190725	1	WT	exp1	2h	35	1065.18	3624.55	1127.12
1	23	2hIR	190725	1	WT	exp1	2h	25	982.659	2124.1	1687.52
1	24	2hIR	190725	1	WT	exp1	2h	10	408.818	2103.41	334.618
1	25	2hIR	190725	1	WT	exp1	2h	18	1244.26	3160.52	2202.72
1	26	2hIR	190725	1	WT	exp1	2h	13	683.746	2279.07	1734.14
1	27	2hIR	190725	1	WT	exp1	2h	5	480.905	2022.95	1180.73
1	28	2hIR	190725	1	WT	exp1	2h	23	1059.32	3366.08	728.887
1	29	2hIR	190725	1	WT	exp1	2h	15	771.34	3164.52	1244.17
1	30	2hIR	190725	1	WT	exp1	2h	13	863.444	3904.11	1112.85
1	31	2hIR	190725	1	WT	exp1	2h	27	976.926	2271.16	2012.7
1	32	2hIR	190725	1	WT	exp1	2h	25	1108.99	4292.42	371.128
1	33	2hIR	190725	1	WT	exp1	2h	13	606.143	2113.35	565.459
1	34	2hIR	190725	1	WT	exp1	2h	40	1541.87	4806.88	2880.18
1	35	2hIR	190725	1	WT	exp1	2h	2	467.614	2008.65	1285.31
1	36	2hIR	190725	1	WT	exp1	2h	14	861.174	3332.64	1321.71
1	37	2hIR	190725	1	WT	exp1	2h	2	504.86	1642.26	1138.24
1	38	2hIR	190725	1	WT	exp1	2h	27	1088.54	3238.34	953.95
1	39	2hIR	190725	1	WT	exp1	2h	10	414.118	1251.91	940.16
1	40	2hIR	190725	1	WT	exp1	2h	19	737.385	2175.24	823.144
1	41	2hIR	190725	1	WT	exp1	2h	13	1044.59	3173.77	1637.46
1	42	2hIR	190725	1	WT	exp1	2h	4	306.722	1406.54	488.183
1	43	2hIR	190725	1	WT	exp1	2h	7	594.848	1294.43	1429.25
1	44	2hIR	190725	1	WT	exp1	2h	9	325.096	1543.89	864.742
2	1	noIR	190725	1	WT	exp1	noIR	4	1696.11	1344.73	1228.27
2	2	noIR	190725	1	WT	exp1	noIR	9	2560.7	2380.47	2599.65
2	3	noIR	190725	1	WT	exp1	noIR	0	2219.62	2225.29	1459.17
2	4	noIR	190725	1	WT	exp1	noIR	5	1794.44	1654.8	1873.1
2	5	noIR	190725	1	WT	exp1	noIR	10	2813.51	2178.02	3519.64
2	6	noIR	190725	1	WT	exp1	noIR	5	1043.32	1135.33	1218.32
2	7	noIR	190725	1	WT	exp1	noIR	7	1755.84	1926.6	2569.19
2	8	noIR	190725	1	WT	exp1	noIR	6	2129.76	2296.16	2392.1
2	9	noIR	190725	1	WT	exp1	noIR	10	2744.38	3048.25	221.304
2	10	noIR	190725	1	WT	exp1	noIR	3	3005.27	3142.06	213.526
2	11	noIR	190725	1	WT	exp1	noIR	5	2933.32	2696.58	1045.41
2	12	noIR	190725	1	WT	exp1	noIR	2	1760.31	1867.83	2139.57
2	13	noIR	190725	1	WT	exp1	noIR	5	1979.6	2197.69	2572.99
2	14	noIR	190725	1	WT	exp1	noIR	4	2298.61	1964.39	5408.71
2	15	noIR	190725	1	WT	exp1	noIR	8	2033.98	2062.75	2271.51
2	16	noIR	190725	1	WT	exp1	noIR	10	2479.1	2270.88	1877.47
2	17	noIR	190725	1	WT	exp1	noIR	3	2801.37	3032.04	215.69
2	18	noIR	190725	1	WT	exp1	noIR	9	2543.49	2818.71	1293.83
2	19	noIR	190725	1	WT	exp1	noIR	8	4075.2	4404.44	296.616
2	20	noIR	190725	1	WT	exp1	noIR	16	3487.43	3530.3	2343.52
2	21	noIR	190725	1	WT	exp1	noIR	4	2645.38	2731.18	272.479
2	22	noIR	190725	1	WT	exp1	noIR	7	2866.98	2915.62	2811.31
2	23	noIR	190725	1	WT	exp1	noIR	1	1707.51	1535.68	1960.84
2	24	noIR	190725	1	WT	exp1	noIR	15	2748.95	3269.92	3697.4
2	25	noIR	190725	1	WT	exp1	noIR	2	510.861	675.382	35.1522
2	26	noIR	190725	1	WT	exp1	noIR	9	1961.5	1816.22	2235.53
2	27	noIR	190725	1	WT	exp1	noIR	2	871.333	1476.31	64.9027
2	28	noIR	190725	1	WT	exp1	noIR	7	2668.07	2598.07	1740.17
2	29	noIR	190725	1	WT	exp1	noIR	2	3095.65	3027.75	269.88
2	30	noIR	190725	1	WT	exp1	noIR	3	1470.48	1539.71	2123.18
2	31	noIR	190725	1	WT	exp1	noIR	3	1042.6	1089.85	1389.8
2	32	noIR	190725	1	WT	exp1	noIR	9	3538.9	3250.61	2586.3
2	33	noIR	190725	1	WT	exp1	noIR	1	1478.85	1237.94	109.245
2	34	noIR	190725	1	WT	exp1	noIR	15	2755.58	2818.03	2264.05
3	1	2hIR	190725	1	dCTD	exp1	2h	1	394.383	1012.51	744.637
3	2	2hIR	190725	1	dCTD	exp1	2h	0	255.654	838.048	49.1185
3	3	2hIR	190725	1	dCTD	exp1	2h	3	811.474	1956.99	866.706
3	4	2hIR	190725	1	dCTD	exp1	2h	1	469.09	924.997	1072.77
3	5	2hIR	190725	1	dCTD	exp1	2h	0	315.1	669.747	85.5801
3	6	2hIR	190725	1	dCTD	exp1	2h	0	757.75	2326.84	167.021
3	7	2hIR	190725	1	dCTD	exp1	2h	16	817.119	1679.55	1340.04
3	8	2hIR	190725	1	dCTD	exp1	2h	21	819.33	1688.54	1255.21
3	9	2hIR	190725	1	dCTD	exp1	2h	11	807.765	1627.39	968.925
3	10	2hIR	190725	1	dCTD	exp1	2h	3	901.229	1776.66	1162.2
3	11	2hIR	190725	1	dCTD	exp1	2h	22	814.583	1927.46	247.108
3	12	2hIR	190725	1	dCTD	exp1	2h	6	561.526	1174.76	881.093
3	13	2hIR	190725	1	dCTD	exp1	2h	11	668.186	1506.53	1730.49
3	14	2hIR	190725	1	dCTD	exp1	2h	0	283.564	923.391	64.2254
3	15	2hIR	190725	1	dCTD	exp1	2h	0	206.37	496.989	415.749
3	16	2hIR	190725	1	dCTD	exp1	2h	2	433.879	1072.04	974.138
3	17	2hIR	190725	1	dCTD	exp1	2h	0	345.138	826.945	703.478
3	18	2hIR	190725	1	dCTD	exp1	2h	19	959.776	1616.77	1326.09
3	19	2hIR	190725	1	dCTD	exp1	2h	15	996.673	2645.17	1984.17
3	20	2hIR	190725	1	dCTD	exp1	2h	0	174.088	609.553	215.408
3	21	2hIR	190725	1	dCTD	exp1	2h	10	762.116	1930.9	893.976
3	22	2hIR	190725	1	dCTD	exp1	2h	9	712.001	1773.54	1895.28
3	23	2hIR	190725	1	dCTD	exp1	2h	9	431.457	1274.49	1256.19
3	24	2hIR	190725	1	dCTD	exp1	2h	7	873.854	1661.97	1352.47
3	25	2hIR	190725	1	dCTD	exp1	2h	5	372.609	881.018	793.327
3	26	2hIR	190725	1	dCTD	exp1	2h	6	442.748	1382.32	1187.52
3	27	2hIR	190725	1	dCTD	exp1	2h	18	945.645	2370.47	184.946
3	28	2hIR	190725	1	dCTD	exp1	2h	24	1363.22	3485.9	3108.52
3	29	2hIR	190725	1	dCTD	exp1	2h	5	649.736	1617.71	1955.5
3	30	2hIR	190725	1	dCTD	exp1	2h	10	807.785	2102.56	1914.49
3	31	2hIR	190725	1	dCTD	exp1	2h	8	757.064	2462.93	2052.51
3	32	2hIR	190725	1	dCTD	exp1	2h	6	235.788	604.889	586.134
3	33	2hIR	190725	1	dCTD	exp1	2h	24	1069.05	2073.04	1768.03
3	34	2hIR	190725	1	dCTD	exp1	2h	0	218.585	882.73	367.477
3	35	2hIR	190725	1	dCTD	exp1	2h	2	310.323	1056.62	755.834
4	1	noIR	190725	1	dCTD	exp1	noIR	3	424.147	764.776	1121.05
4	2	noIR	190725	1	dCTD	exp1	noIR	10	617.787	949.939	2113.96
4	3	noIR	190725	1	dCTD	exp1	noIR	2	474.059	1035.76	454.762
4	4	noIR	190725	1	dCTD	exp1	noIR	21	757.441	1549.55	1800.42
4	5	noIR	190725	1	dCTD	exp1	noIR	13	596.53	903.836	2123.92
4	6	noIR	190725	1	dCTD	exp1	noIR	4	433.819	706.512	276.841
4	7	noIR	190725	1	dCTD	exp1	noIR	8	668.45	1042.87	2341.21
4	8	noIR	190725	1	dCTD	exp1	noIR	33	1093.56	2484.26	2689.18
4	9	noIR	190725	1	dCTD	exp1	noIR	2	145.272	235.321	547.124
4	10	noIR	190725	1	dCTD	exp1	noIR	6	596.769	989.169	1914.35
4	11	noIR	190725	1	dCTD	exp1	noIR	2	521.161	1154.83	1393.39
4	12	noIR	190725	1	dCTD	exp1	noIR	9	406.459	725.476	269.306
4	13	noIR	190725	1	dCTD	exp1	noIR	0	420.921	752.103	715.895
4	14	noIR	190725	1	dCTD	exp1	noIR	6	508.808	1261.25	1254.38
4	15	noIR	190725	1	dCTD	exp1	noIR	9	539.333	1048.33	1822.01
4	16	noIR	190725	1	dCTD	exp1	noIR	3	408.63	996.024	844.702
4	17	noIR	190725	1	dCTD	exp1	noIR	7	584.73	1567.57	1143.36
4	18	noIR	190725	1	dCTD	exp1	noIR	5	809.318	1481.92	192.269
4	19	noIR	190725	1	dCTD	exp1	noIR	6	431.104	1557.73	1149.47
4	20	noIR	190725	1	dCTD	exp1	noIR	6	533.051	1136.99	1053.21
4	21	noIR	190725	1	dCTD	exp1	noIR	1	569.121	1725.89	1042.44
4	22	noIR	190725	1	dCTD	exp1	noIR	8	1145.12	2988.75	3514.64
4	23	noIR	190725	1	dCTD	exp1	noIR	15	1137.52	2884.52	2389.72
4	24	noIR	190725	1	dCTD	exp1	noIR	1	367.112	903.437	93.1909
4	25	noIR	190725	1	dCTD	exp1	noIR	5	757.29	2049.93	1582.96
4	26	noIR	190725	1	dCTD	exp1	noIR	9	810.426	2202.59	2108.9
4	27	noIR	190725	1	dCTD	exp1	noIR	0	393.247	1058.66	112.073
4	28	noIR	190725	1	dCTD	exp1	noIR	8	732.953	2364.57	612.766
4	29	noIR	190725	1	dCTD	exp1	noIR	15	872.058	2084.72	1659.89
5	1	2hIR	190725	1	dDBD	exp1	2h	29	899.552	2969.46	162.835
5	2	2hIR	190725	1	dDBD	exp1	2h	21	821.106	2694.23	1009.9
5	3	2hIR	190725	1	dDBD	exp1	2h	18	591.047	2238	522.629
5	4	2hIR	190725	1	dDBD	exp1	2h	10	599.524	2480.95	1520.12
5	5	2hIR	190725	1	dDBD	exp1	2h	21	1252.34	3512.43	221.091
5	6	2hIR	190725	1	dDBD	exp1	2h	29	967.275	3328.87	859.562
5	7	2hIR	190725	1	dDBD	exp1	2h	9	596.509	2073.46	2569.56
5	8	2hIR	190725	1	dDBD	exp1	2h	16	954.402	3357.47	1391.67
5	9	2hIR	190725	1	dDBD	exp1	2h	15	557.577	2506.26	1061.08
5	10	2hIR	190725	1	dDBD	exp1	2h	14	579.546	2216.96	2470.08
5	11	2hIR	190725	1	dDBD	exp1	2h	2	398.361	1660.44	1248.3
5	12	2hIR	190725	1	dDBD	exp1	2h	26	730.379	2778.98	1058.17
5	13	2hIR	190725	1	dDBD	exp1	2h	5	424.9	1793.78	1284.26
5	14	2hIR	190725	1	dDBD	exp1	2h	0	1008.78	3207.53	192.819
5	15	2hIR	190725	1	dDBD	exp1	2h	7	742.87	3562.24	191.244
5	16	2hIR	190725	1	dDBD	exp1	2h	19	683.24	2921.76	668.185
5	17	2hIR	190725	1	dDBD	exp1	2h	28	783.985	3299.95	1314.86
5	18	2hIR	190725	1	dDBD	exp1	2h	13	954.726	3121.93	169.993
5	19	2hIR	190725	1	dDBD	exp1	2h	6	741.029	3940.5	183.081
5	20	2hIR	190725	1	dDBD	exp1	2h	3	1062.68	4106.11	209.063
5	21	2hIR	190725	1	dDBD	exp1	2h	26	745.833	3627.8	1432.14
5	22	2hIR	190725	1	dDBD	exp1	2h	0	390.864	2070.34	505.424
5	23	2hIR	190725	1	dDBD	exp1	2h	22	1124.97	3867.79	221.695
5	24	2hIR	190725	1	dDBD	exp1	2h	22	1071.14	4320.85	955.525
5	25	2hIR	190725	1	dDBD	exp1	2h	32	960.573	3605.58	1090.03
5	26	2hIR	190725	1	dDBD	exp1	2h	10	841.825	3970.16	207.677
5	27	2hIR	190725	1	dDBD	exp1	2h	30	955.298	4117.88	604.402
5	28	2hIR	190725	1	dDBD	exp1	2h	12	893.638	3424.41	170.95
5	29	2hIR	190725	1	dDBD	exp1	2h	0	594.285	3599.6	161.687
5	30	2hIR	190725	1	dDBD	exp1	2h	12	1206.48	2521.03	200.134
5	31	2hIR	190725	1	dDBD	exp1	2h	18	875.676	3422.56	1422.6
5	32	2hIR	190725	1	dDBD	exp1	2h	14	853.223	3286.06	2210.71
5	33	2hIR	190725	1	dDBD	exp1	2h	14	1031.76	3909.29	823.566
5	34	2hIR	190725	1	dDBD	exp1	2h	12	796.576	3248.54	2580.79
6	1	noIR	190725	1	dDBD	exp1	noIR	1	1637.32	2589.43	338.547
6	2	noIR	190725	1	dDBD	exp1	noIR	8	751.825	1500.29	2639.18
6	3	noIR	190725	1	dDBD	exp1	noIR	6	582.78	1215.77	2967.61
6	4	noIR	190725	1	dDBD	exp1	noIR	0	689.791	1669.4	1483.09
6	5	noIR	190725	1	dDBD	exp1	noIR	7	544.174	1339.87	1895.07
6	6	noIR	190725	1	dDBD	exp1	noIR	8	922.256	2218.96	252.266
6	7	noIR	190725	1	dDBD	exp1	noIR	0	624.039	958.033	1968.37
6	8	noIR	190725	1	dDBD	exp1	noIR	4	626.681	1244.57	3014.28
6	9	noIR	190725	1	dDBD	exp1	noIR	12	828.685	1894.2	1176.65
6	10	noIR	190725	1	dDBD	exp1	noIR	2	906.541	2240.84	193.297
6	11	noIR	190725	1	dDBD	exp1	noIR	12	847.739	2608	4601.9
6	12	noIR	190725	1	dDBD	exp1	noIR	7	636.265	2291.29	2924.66
6	13	noIR	190725	1	dDBD	exp1	noIR	4	284.146	786.072	1094.51
6	14	noIR	190725	1	dDBD	exp1	noIR	12	762.599	1359.46	2880.64
6	15	noIR	190725	1	dDBD	exp1	noIR	10	558.965	1465.06	2767.43
6	16	noIR	190725	1	dDBD	exp1	noIR	4	336.818	1082.24	1357.9
6	17	noIR	190725	1	dDBD	exp1	noIR	6	649.487	2214.66	3784.21
6	18	noIR	190725	1	dDBD	exp1	noIR	15	853.063	2300.64	1855.88
6	19	noIR	190725	1	dDBD	exp1	noIR	6	553.44	2000.08	1744.85
6	20	noIR	190725	1	dDBD	exp1	noIR	14	817.216	2706.17	3893.24
6	21	noIR	190725	1	dDBD	exp1	noIR	14	702.095	1804.33	2949.98
6	22	noIR	190725	1	dDBD	exp1	noIR	1	564.423	1088.79	2045.95
6	23	noIR	190725	1	dDBD	exp1	noIR	13	756.679	2537.06	1802.64
6	24	noIR	190725	1	dDBD	exp1	noIR	11	668.27	1603.12	3024.33
6	25	noIR	190725	1	dDBD	exp1	noIR	11	1178.35	2336.4	329.862
6	26	noIR	190725	1	dDBD	exp1	noIR	0	618.294	2161.58	185.003
6	27	noIR	190725	1	dDBD	exp1	noIR	13	798.5	3214.69	1406.49
6	28	noIR	190725	1	dDBD	exp1	noIR	10	640.339	1590.82	2996.55
6	29	noIR	190725	1	dDBD	exp1	noIR	5	464.275	1626.59	802.547
6	30	noIR	190725	1	dDBD	exp1	noIR	10	512.681	1129.04	2564.01
6	31	noIR	190725	1	dDBD	exp1	noIR	5	586.347	1655.64	1071.63
7	1	2hIR	190725	1	dDBDdCTD	exp1	2h	2	702.22	2633.51	223.4
7	2	2hIR	190725	1	dDBDdCTD	exp1	2h	0	371.39	1478.87	118.223
7	3	2hIR	190725	1	dDBDdCTD	exp1	2h	16	757.161	2245.82	1652.33
7	4	2hIR	190725	1	dDBDdCTD	exp1	2h	8	753.008	2328.01	1881.24
7	5	2hIR	190725	1	dDBDdCTD	exp1	2h	4	1178.32	4038.95	253.948
7	6	2hIR	190725	1	dDBDdCTD	exp1	2h	17	772.436	2130.66	1971.31
7	7	2hIR	190725	1	dDBDdCTD	exp1	2h	18	889.856	3103.08	233.585
7	8	2hIR	190725	1	dDBDdCTD	exp1	2h	13	733.806	2595.34	1534.3
7	9	2hIR	190725	1	dDBDdCTD	exp1	2h	15	713.154	1735.68	2884.88
7	10	2hIR	190725	1	dDBDdCTD	exp1	2h	20	692.333	1496.46	2056.83
7	11	2hIR	190725	1	dDBDdCTD	exp1	2h	34	1034.44	3664.07	272.151
7	12	2hIR	190725	1	dDBDdCTD	exp1	2h	20	831.059	1952.01	3019.17
7	13	2hIR	190725	1	dDBDdCTD	exp1	2h	16	781.948	2292.06	2794.29
7	14	2hIR	190725	1	dDBDdCTD	exp1	2h	15	1245.97	4412.13	285.428
7	15	2hIR	190725	1	dDBDdCTD	exp1	2h	13	819.799	3874.55	293.543
7	16	2hIR	190725	1	dDBDdCTD	exp1	2h	17	776.027	2577.43	2587.96
7	17	2hIR	190725	1	dDBDdCTD	exp1	2h	16	712.855	2971.25	1126.74
7	18	2hIR	190725	1	dDBDdCTD	exp1	2h	19	927.894	2355.51	2792.65
7	19	2hIR	190725	1	dDBDdCTD	exp1	2h	40	1351.38	4180.32	424.986
7	20	2hIR	190725	1	dDBDdCTD	exp1	2h	12	823.276	2972.43	461.251
7	21	2hIR	190725	1	dDBDdCTD	exp1	2h	30	1014.58	2594.61	311.996
8	1	noIR	190725	1	dDBDdCTD	exp1	noIR	17	552.072	1580.78	3073.29
8	2	noIR	190725	1	dDBDdCTD	exp1	noIR	6	542.382	837.035	2523.29
8	3	noIR	190725	1	dDBDdCTD	exp1	noIR	1	1017.95	1732.48	225.117
8	4	noIR	190725	1	dDBDdCTD	exp1	noIR	8	566.695	1208.18	2882.5
8	5	noIR	190725	1	dDBDdCTD	exp1	noIR	18	620.868	1226.78	3072.4
8	6	noIR	190725	1	dDBDdCTD	exp1	noIR	7	585.104	1201.03	3935.4
8	7	noIR	190725	1	dDBDdCTD	exp1	noIR	0	174.517	831.622	59.9846
8	8	noIR	190725	1	dDBDdCTD	exp1	noIR	4	561.334	2106.2	254.071
8	9	noIR	190725	1	dDBDdCTD	exp1	noIR	16	589.149	1365.61	2901.24
8	10	noIR	190725	1	dDBDdCTD	exp1	noIR	2	181.016	644.814	574.757
8	11	noIR	190725	1	dDBDdCTD	exp1	noIR	0	798.644	2118.85	207.809
8	12	noIR	190725	1	dDBDdCTD	exp1	noIR	15	665.364	1586.43	3354.42
8	13	noIR	190725	1	dDBDdCTD	exp1	noIR	9	623.425	1437.43	3498.68
8	14	noIR	190725	1	dDBDdCTD	exp1	noIR	0	589.901	2489.88	182.516
8	15	noIR	190725	1	dDBDdCTD	exp1	noIR	25	711.969	1757.31	3380.22
8	16	noIR	190725	1	dDBDdCTD	exp1	noIR	9	514.248	1454.06	2880.45
8	17	noIR	190725	1	dDBDdCTD	exp1	noIR	1	870.359	2348.71	206.943
8	18	noIR	190725	1	dDBDdCTD	exp1	noIR	12	601.732	1794.91	1847.73
8	19	noIR	190725	1	dDBDdCTD	exp1	noIR	0	403.604	1161.11	96.1223
8	20	noIR	190725	1	dDBDdCTD	exp1	noIR	2	380.985	787.285	1270.7
8	21	noIR	190725	1	dDBDdCTD	exp1	noIR	0	434.427	1240.85	118.204
8	22	noIR	190725	1	dDBDdCTD	exp1	noIR	13	545.781	1687.3	3003.25
8	23	noIR	190725	1	dDBDdCTD	exp1	noIR	1	563.86	1613.99	150.472
8	24	noIR	190725	1	dDBDdCTD	exp1	noIR	29	896.157	1789.27	4731.01
8	25	noIR	190725	1	dDBDdCTD	exp1	noIR	0	137.945	633.833	47.2052
8	26	noIR	190725	1	dDBDdCTD	exp1	noIR	24	771.735	1638.75	3735.18
8	27	noIR	190725	1	dDBDdCTD	exp1	noIR	2	612.798	2249.31	178.733
8	28	noIR	190725	1	dDBDdCTD	exp1	noIR	0	953.595	2815.91	230.561
8	29	noIR	190725	1	dDBDdCTD	exp1	noIR	0	238.539	585.456	61.3501
8	30	noIR	190725	1	dDBDdCTD	exp1	noIR	1	478.795	792.173	1515.41
8	31	noIR	190725	1	dDBDdCTD	exp1	noIR	16	648.874	1847.57	4356.94
8	32	noIR	190725	1	dDBDdCTD	exp1	noIR	3	626.45	1673.97	366.397
9	1	2hIR	190725	2	WT	exp1	2h	12	641.008	1748.28	2065.01
9	2	2hIR	190725	2	WT	exp1	2h	5	191.838	413.808	506.12
9	3	2hIR	190725	2	WT	exp1	2h	12	571.566	1326.28	1480.86
9	4	2hIR	190725	2	WT	exp1	2h	0	663.478	2394.51	145.802
9	5	2hIR	190725	2	WT	exp1	2h	29	1141.41	3716.8	1668.84
9	6	2hIR	190725	2	WT	exp1	2h	2	1547.93	3835.61	227.695
9	7	2hIR	190725	2	WT	exp1	2h	18	947.628	2875.59	1794.55
9	8	2hIR	190725	2	WT	exp1	2h	8	1335.19	4380.02	221.327
9	9	2hIR	190725	2	WT	exp1	2h	4	771.666	3441.59	172.979
9	10	2hIR	190725	2	WT	exp1	2h	0	1250.57	4072.25	244.421
9	11	2hIR	190725	2	WT	exp1	2h	11	1661.98	4562.12	323.687
9	12	2hIR	190725	2	WT	exp1	2h	7	723.79	2701.59	1893.26
9	13	2hIR	190725	2	WT	exp1	2h	0	1217.85	4282.09	218.02
9	14	2hIR	190725	2	WT	exp1	2h	15	1199.28	4335.58	215.698
9	15	2hIR	190725	2	WT	exp1	2h	1	1427.45	5033.65	246.958
9	16	2hIR	190725	2	WT	exp1	2h	24	1037.69	4307.69	186.689
9	17	2hIR	190725	2	WT	exp1	2h	15	742.032	3009.84	1213.46
9	18	2hIR	190725	2	WT	exp1	2h	12	1025.68	4266.01	206.304
9	19	2hIR	190725	2	WT	exp1	2h	19	868.685	3914.95	1397.9
9	20	2hIR	190725	2	WT	exp1	2h	15	978.266	3888.76	1744.62
9	21	2hIR	190725	2	WT	exp1	2h	0	546.02	2414.49	464.135
9	22	2hIR	190725	2	WT	exp1	2h	24	865.669	3713.23	1580.26
9	23	2hIR	190725	2	WT	exp1	2h	1	543.081	2450.62	548.368
9	24	2hIR	190725	2	WT	exp1	2h	24	871.373	2981.95	1830.44
9	25	2hIR	190725	2	WT	exp1	2h	30	1114.45	4322.11	1686.61
9	26	2hIR	190725	2	WT	exp1	2h	0	719.503	5770.85	249.339
9	27	2hIR	190725	2	WT	exp1	2h	21	1050.69	2644.1	2178.14
9	28	2hIR	190725	2	WT	exp1	2h	22	898.943	2392.05	1643.61
10	1	noIR	190725	2	WT	exp1	noIR	4	1434.6	1352.8	1407.15
10	2	noIR	190725	2	WT	exp1	noIR	12	2243.58	2806.4	2170.95
10	3	noIR	190725	2	WT	exp1	noIR	0	1416.99	1567.75	1644.19
10	4	noIR	190725	2	WT	exp1	noIR	9	3330.78	2682.23	2991.2
10	5	noIR	190725	2	WT	exp1	noIR	1	1523.41	1886.5	3042.69
10	6	noIR	190725	2	WT	exp1	noIR	28	4656.62	3004.79	340.2
10	7	noIR	190725	2	WT	exp1	noIR	1	1603.96	2152.56	3063.97
10	8	noIR	190725	2	WT	exp1	noIR	10	2962.6	2604.42	2268.73
10	9	noIR	190725	2	WT	exp1	noIR	0	1551.1	1672.98	2582.91
10	10	noIR	190725	2	WT	exp1	noIR	3	1709.34	2101.2	2823.63
10	11	noIR	190725	2	WT	exp1	noIR	0	1599.57	1861.1	2804.86
10	12	noIR	190725	2	WT	exp1	noIR	9	3457.1	3080.08	2227.76
10	13	noIR	190725	2	WT	exp1	noIR	1	1408.53	1713.56	2914.51
10	14	noIR	190725	2	WT	exp1	noIR	2	1657.61	2367.65	2319.53
10	15	noIR	190725	2	WT	exp1	noIR	3	3000.8	2957.83	1761.13
10	16	noIR	190725	2	WT	exp1	noIR	2	674.646	935.516	815.826
10	17	noIR	190725	2	WT	exp1	noIR	2	1343.84	1486.47	110.725
10	18	noIR	190725	2	WT	exp1	noIR	10	1945.23	2792.45	3493.53
10	19	noIR	190725	2	WT	exp1	noIR	11	3996.21	2715.81	399.605
10	20	noIR	190725	2	WT	exp1	noIR	3	580.397	416.803	57.7881
10	21	noIR	190725	2	WT	exp1	noIR	5	2849.7	3439.3	258.357
10	22	noIR	190725	2	WT	exp1	noIR	8	2103.36	2748.19	3207.91
10	23	noIR	190725	2	WT	exp1	noIR	11	2739.97	2771.38	223.653
10	24	noIR	190725	2	WT	exp1	noIR	9	2217.77	2525.84	1898.73
10	25	noIR	190725	2	WT	exp1	noIR	0	1381.4	1687.42	1977.9
10	26	noIR	190725	2	WT	exp1	noIR	9	2383.81	2268.67	3228.22
10	27	noIR	190725	2	WT	exp1	noIR	3	1242.98	1854.1	2605.88
10	28	noIR	190725	2	WT	exp1	noIR	3	1998.28	2252.81	3767.36
10	29	noIR	190725	2	WT	exp1	noIR	1	425.044	482.158	404.018
11	1	2hIR	190725	2	dCTD	exp1	2h	2	369.301	905.843	744.167
11	2	2hIR	190725	2	dCTD	exp1	2h	4	316.93	658.83	60.012
11	3	2hIR	190725	2	dCTD	exp1	2h	0	349.747	844.204	784.352
11	4	2hIR	190725	2	dCTD	exp1	2h	7	675.824	1340.69	1416.64
11	5	2hIR	190725	2	dCTD	exp1	2h	0	449.671	949.052	467.139
11	6	2hIR	190725	2	dCTD	exp1	2h	0	272.056	579.252	190.162
11	7	2hIR	190725	2	dCTD	exp1	2h	0	458.347	733.48	824.157
11	8	2hIR	190725	2	dCTD	exp1	2h	0	481.491	1127.08	1264.82
11	9	2hIR	190725	2	dCTD	exp1	2h	9	430.304	1190.68	709.137
11	10	2hIR	190725	2	dCTD	exp1	2h	0	422.349	890.243	351.445
11	11	2hIR	190725	2	dCTD	exp1	2h	4	271.893	773.897	431.288
11	12	2hIR	190725	2	dCTD	exp1	2h	19	756.425	2029.89	452.085
11	13	2hIR	190725	2	dCTD	exp1	2h	0	209.52	336.606	349.87
11	14	2hIR	190725	2	dCTD	exp1	2h	5	502.222	1193.95	726.92
11	15	2hIR	190725	2	dCTD	exp1	2h	0	394.967	1071.7	1071.8
11	16	2hIR	190725	2	dCTD	exp1	2h	3	548.583	1386.48	715.252
11	17	2hIR	190725	2	dCTD	exp1	2h	12	731.629	2406.7	1261.02
11	18	2hIR	190725	2	dCTD	exp1	2h	19	991.911	1757.94	978.398
11	19	2hIR	190725	2	dCTD	exp1	2h	8	898.912	2346.61	1691.02
11	20	2hIR	190725	2	dCTD	exp1	2h	0	110.814	288.482	76.3954
11	21	2hIR	190725	2	dCTD	exp1	2h	27	1350.69	3174.17	1074.08
11	22	2hIR	190725	2	dCTD	exp1	2h	0	545.401	1604	666.31
11	23	2hIR	190725	2	dCTD	exp1	2h	20	732.81	1867.07	2761.13
11	24	2hIR	190725	2	dCTD	exp1	2h	22	892.018	2557.8	669.369
11	25	2hIR	190725	2	dCTD	exp1	2h	12	750.166	1807.56	412.693
11	26	2hIR	190725	2	dCTD	exp1	2h	12	1492.34	3728.9	281.38
11	27	2hIR	190725	2	dCTD	exp1	2h	35	1118.33	3281.31	1698.66
11	28	2hIR	190725	2	dCTD	exp1	2h	16	887.088	2481.54	1318.47
11	29	2hIR	190725	2	dCTD	exp1	2h	18	750.542	2341.96	1423.97
11	30	2hIR	190725	2	dCTD	exp1	2h	7	570.337	1460.3	1653.92
11	31	2hIR	190725	2	dCTD	exp1	2h	12	677.283	1733.11	1962.11
11	32	2hIR	190725	2	dCTD	exp1	2h	9	478.431	1321.64	1670.4
11	33	2hIR	190725	2	dCTD	exp1	2h	12	1625.43	6826.8	449.921
11	34	2hIR	190725	2	dCTD	exp1	2h	15	617.534	1702.81	1345.8
11	35	2hIR	190725	2	dCTD	exp1	2h	31	1161.64	2981.05	1829.72
11	36	2hIR	190725	2	dCTD	exp1	2h	20	874.823	1889.63	391.727
11	37	2hIR	190725	2	dCTD	exp1	2h	23	735.659	2257.56	1351.17
11	38	2hIR	190725	2	dCTD	exp1	2h	13	729.95	1453.64	1509
11	39	2hIR	190725	2	dCTD	exp1	2h	13	500.184	1048.71	1497.82
11	40	2hIR	190725	2	dCTD	exp1	2h	4	991.165	2982.93	211.708
11	41	2hIR	190725	2	dCTD	exp1	2h	11	404.216	1075.94	624.875
11	42	2hIR	190725	2	dCTD	exp1	2h	16	600.937	1386.08	1014.27
11	43	2hIR	190725	2	dCTD	exp1	2h	14	542.12	1338.7	824.495
12	1	noIR	190725	2	dCTD	exp1	noIR	6	589.75	945.756	1595.67
12	2	noIR	190725	2	dCTD	exp1	noIR	1	812.616	1414.82	171.11
12	3	noIR	190725	2	dCTD	exp1	noIR	7	662.554	1202.69	1760.69
12	4	noIR	190725	2	dCTD	exp1	noIR	11	1008.07	2598.61	1488.16
12	5	noIR	190725	2	dCTD	exp1	noIR	11	506.532	1117.38	1539.88
12	6	noIR	190725	2	dCTD	exp1	noIR	7	511.079	827.429	1363.53
12	7	noIR	190725	2	dCTD	exp1	noIR	5	483.773	1148.9	999.469
12	8	noIR	190725	2	dCTD	exp1	noIR	8	481.932	1106.03	1065.39
12	9	noIR	190725	2	dCTD	exp1	noIR	16	830.838	1799.41	1551.58
12	10	noIR	190725	2	dCTD	exp1	noIR	3	590.1	936.471	1552.62
12	11	noIR	190725	2	dCTD	exp1	noIR	15	1079.12	2031.26	1677.18
12	12	noIR	190725	2	dCTD	exp1	noIR	4	392.418	900.884	952.754
12	13	noIR	190725	2	dCTD	exp1	noIR	11	618.832	1124.93	859.239
12	14	noIR	190725	2	dCTD	exp1	noIR	0	338.818	840.621	296.662
12	15	noIR	190725	2	dCTD	exp1	noIR	7	389.857	790.837	938.971
12	16	noIR	190725	2	dCTD	exp1	noIR	0	420.173	788.264	448.591
12	17	noIR	190725	2	dCTD	exp1	noIR	9	449.959	952.455	649.083
12	18	noIR	190725	2	dCTD	exp1	noIR	5	413.69	1206.25	796.425
12	19	noIR	190725	2	dCTD	exp1	noIR	14	706.682	1341.15	1237.91
12	20	noIR	190725	2	dCTD	exp1	noIR	8	640.226	1712.66	1496.74
12	21	noIR	190725	2	dCTD	exp1	noIR	0	636.314	2219.35	283.058
12	22	noIR	190725	2	dCTD	exp1	noIR	12	525.368	999.631	1114.7
12	23	noIR	190725	2	dCTD	exp1	noIR	16	941.136	2319.51	2201.98
12	24	noIR	190725	2	dCTD	exp1	noIR	10	670.892	1141.8	1730.38
12	25	noIR	190725	2	dCTD	exp1	noIR	12	824.323	1458.02	2009.21
12	26	noIR	190725	2	dCTD	exp1	noIR	16	745.8	1588.52	1531.66
12	27	noIR	190725	2	dCTD	exp1	noIR	3	865.371	1221.22	1912.28
12	28	noIR	190725	2	dCTD	exp1	noIR	11	614.393	1384.02	573.501
12	29	noIR	190725	2	dCTD	exp1	noIR	10	512.339	1187.69	1220.94
12	30	noIR	190725	2	dCTD	exp1	noIR	20	577.312	1115.8	1279.94
12	31	noIR	190725	2	dCTD	exp1	noIR	13	713.701	1367.49	1328.23
12	32	noIR	190725	2	dCTD	exp1	noIR	2	382.42	783.686	730.036
12	33	noIR	190725	2	dCTD	exp1	noIR	12	923.406	1833.51	694.788
12	34	noIR	190725	2	dCTD	exp1	noIR	27	692.662	1635.98	1447.35
12	35	noIR	190725	2	dCTD	exp1	noIR	11	582.244	1023.8	1283.21
12	36	noIR	190725	2	dCTD	exp1	noIR	7	626.441	1590.11	1528.48
12	37	noIR	190725	2	dCTD	exp1	noIR	10	551.544	1113.55	1619.57
12	38	noIR	190725	2	dCTD	exp1	noIR	10	697.757	1246.83	1540.31
12	39	noIR	190725	2	dCTD	exp1	noIR	2	624.99	2304.49	1059.18
12	40	noIR	190725	2	dCTD	exp1	noIR	0	278.295	701.213	66.8268
13	1	2hIR	190725	2	dDBD	exp1	2h	22	860.105	2073.83	2195.7
13	2	2hIR	190725	2	dDBD	exp1	2h	16	503.984	1307.64	1929.27
13	3	2hIR	190725	2	dDBD	exp1	2h	9	615.882	1533.55	1947.93
13	4	2hIR	190725	2	dDBD	exp1	2h	3	524.104	1314.6	440.354
13	5	2hIR	190725	2	dDBD	exp1	2h	5	605.164	1642.01	1971.16
13	6	2hIR	190725	2	dDBD	exp1	2h	0	438.719	1216.79	517.867
13	7	2hIR	190725	2	dDBD	exp1	2h	22	907.89	1898.25	1613.57
13	8	2hIR	190725	2	dDBD	exp1	2h	14	605.838	1711.65	2209.34
13	9	2hIR	190725	2	dDBD	exp1	2h	32	832.723	2645.67	676.554
13	10	2hIR	190725	2	dDBD	exp1	2h	16	699.905	2146.81	2421.39
13	11	2hIR	190725	2	dDBD	exp1	2h	6	448.096	1690.59	1849.43
13	12	2hIR	190725	2	dDBD	exp1	2h	29	964.89	2397.64	1369.95
13	13	2hIR	190725	2	dDBD	exp1	2h	1	433.305	1335.99	1376.65
13	14	2hIR	190725	2	dDBD	exp1	2h	26	906.024	2316.2	204.034
13	15	2hIR	190725	2	dDBD	exp1	2h	30	792.929	2954.1	925.196
13	16	2hIR	190725	2	dDBD	exp1	2h	28	1088.37	3183.48	187.612
13	17	2hIR	190725	2	dDBD	exp1	2h	28	1039.2	3200.47	208.365
13	18	2hIR	190725	2	dDBD	exp1	2h	34	877.318	2933.1	158.168
13	19	2hIR	190725	2	dDBD	exp1	2h	20	714.794	2071.65	2503.3
13	20	2hIR	190725	2	dDBD	exp1	2h	36	941.58	2938.86	183.353
13	21	2hIR	190725	2	dDBD	exp1	2h	0	410.302	1640.64	825.657
13	22	2hIR	190725	2	dDBD	exp1	2h	4	457.736	1888.36	1665.49
13	23	2hIR	190725	2	dDBD	exp1	2h	8	616.376	3705.94	557.895
13	24	2hIR	190725	2	dDBD	exp1	2h	10	963.339	3397.3	181.418
13	25	2hIR	190725	2	dDBD	exp1	2h	0	135.892	409.627	380.297
13	26	2hIR	190725	2	dDBD	exp1	2h	14	673.932	3689.56	1526.62
13	27	2hIR	190725	2	dDBD	exp1	2h	8	445.334	2667.26	2235.38
13	28	2hIR	190725	2	dDBD	exp1	2h	3	274.042	1048.11	797.333
13	29	2hIR	190725	2	dDBD	exp1	2h	9	632.17	2828.95	1522.47
13	30	2hIR	190725	2	dDBD	exp1	2h	13	556.653	2402.21	1794
13	31	2hIR	190725	2	dDBD	exp1	2h	9	410.41	1578.12	1570.75
13	32	2hIR	190725	2	dDBD	exp1	2h	11	468.696	2177.03	2020
13	33	2hIR	190725	2	dDBD	exp1	2h	11	620.672	2957.88	2786.94
13	34	2hIR	190725	2	dDBD	exp1	2h	12	604.454	2471.38	137.178
13	35	2hIR	190725	2	dDBD	exp1	2h	3	437.461	2585.3	1960.75
13	36	2hIR	190725	2	dDBD	exp1	2h	12	576.305	2227.49	2183.74
13	37	2hIR	190725	2	dDBD	exp1	2h	16	453.428	1539.63	1486.82
13	38	2hIR	190725	2	dDBD	exp1	2h	3	409.212	2610.1	2278.8
13	39	2hIR	190725	2	dDBD	exp1	2h	12	581.626	2664	845.441
13	40	2hIR	190725	2	dDBD	exp1	2h	15	444.403	1601.48	1529.08
13	41	2hIR	190725	2	dDBD	exp1	2h	7	444.333	2225.39	1698.63
13	42	2hIR	190725	2	dDBD	exp1	2h	14	628.104	2746.43	2021.96
13	43	2hIR	190725	2	dDBD	exp1	2h	19	686.229	2051.52	2193.97
13	44	2hIR	190725	2	dDBD	exp1	2h	20	573.515	1584.17	1549.15
13	45	2hIR	190725	2	dDBD	exp1	2h	7	703.487	2713.52	2344.24
13	46	2hIR	190725	2	dDBD	exp1	2h	10	427.862	1754.1	1671.51
13	47	2hIR	190725	2	dDBD	exp1	2h	8	547.705	2049.92	120.674
13	48	2hIR	190725	2	dDBD	exp1	2h	33	930.58	3573.21	345.661
13	49	2hIR	190725	2	dDBD	exp1	2h	3	234.739	1115.71	1094.85
13	50	2hIR	190725	2	dDBD	exp1	2h	23	788.257	2108.19	3004.85
13	51	2hIR	190725	2	dDBD	exp1	2h	7	632.008	2296.66	1671.03
13	52	2hIR	190725	2	dDBD	exp1	2h	17	896.304	3763.52	895.351
13	53	2hIR	190725	2	dDBD	exp1	2h	10	751.37	2636.17	174.507
14	1	noIR	190725	2	dDBD	exp1	noIR	7	756.871	1722.21	1954.64
14	2	noIR	190725	2	dDBD	exp1	noIR	2	514.26	1109.17	2773.24
14	3	noIR	190725	2	dDBD	exp1	noIR	8	666.337	1610.03	2196.01
14	4	noIR	190725	2	dDBD	exp1	noIR	6	421.283	1206.22	1371
14	5	noIR	190725	2	dDBD	exp1	noIR	5	668.04	1287.93	3315.79
14	6	noIR	190725	2	dDBD	exp1	noIR	3	743.764	1738.65	3432.91
14	7	noIR	190725	2	dDBD	exp1	noIR	10	967.211	1645.15	3931.75
14	8	noIR	190725	2	dDBD	exp1	noIR	8	650.468	1832.37	1947.12
14	9	noIR	190725	2	dDBD	exp1	noIR	13	408.781	1166.37	1437.33
14	10	noIR	190725	2	dDBD	exp1	noIR	12	762.343	2224.38	4241.98
14	11	noIR	190725	2	dDBD	exp1	noIR	5	643.335	1738.54	2882.7
14	12	noIR	190725	2	dDBD	exp1	noIR	6	652.666	1548.12	2964.98
14	13	noIR	190725	2	dDBD	exp1	noIR	19	1222.26	2427.19	5258.7
14	14	noIR	190725	2	dDBD	exp1	noIR	7	591.997	1777.64	3366.32
14	15	noIR	190725	2	dDBD	exp1	noIR	18	1173.28	2465.43	4291.77
14	16	noIR	190725	2	dDBD	exp1	noIR	21	1134.48	2584	1660.9
14	17	noIR	190725	2	dDBD	exp1	noIR	2	767.388	2157.8	1394.49
14	18	noIR	190725	2	dDBD	exp1	noIR	9	1321.04	4437.76	2487.07
14	19	noIR	190725	2	dDBD	exp1	noIR	2	440.219	1119.91	121.111
14	20	noIR	190725	2	dDBD	exp1	noIR	14	1026.84	2053.6	4351.94
14	21	noIR	190725	2	dDBD	exp1	noIR	13	1147.07	2404.93	1646.75
14	22	noIR	190725	2	dDBD	exp1	noIR	22	2295.24	6142.27	2274.96
14	23	noIR	190725	2	dDBD	exp1	noIR	8	353.14	940.683	259.023
14	24	noIR	190725	2	dDBD	exp1	noIR	18	902.443	2466.5	817.845
14	25	noIR	190725	2	dDBD	exp1	noIR	2	1103.93	2332.83	1726.97
14	26	noIR	190725	2	dDBD	exp1	noIR	4	391.347	1140.11	113.428
14	27	noIR	190725	2	dDBD	exp1	noIR	2	476.77	1907.08	99.8565
14	28	noIR	190725	2	dDBD	exp1	noIR	10	830.486	2513.65	1289.37
14	29	noIR	190725	2	dDBD	exp1	noIR	7	697.155	2175.73	3093.88
14	30	noIR	190725	2	dDBD	exp1	noIR	5	770.434	2160.74	133.174
14	31	noIR	190725	2	dDBD	exp1	noIR	18	1242.88	2115.05	5956.34
14	32	noIR	190725	2	dDBD	exp1	noIR	5	853.929	2320.71	4089.28
14	33	noIR	190725	2	dDBD	exp1	noIR	5	1290.07	2916.16	1232.2
15	1	2hIR	190725	2	dDBDdCTD	exp1	2h	3	568.202	1691.17	811.453
15	2	2hIR	190725	2	dDBDdCTD	exp1	2h	4	780.589	2701.12	562.245
15	3	2hIR	190725	2	dDBDdCTD	exp1	2h	7	974.69	2696.46	283.864
15	4	2hIR	190725	2	dDBDdCTD	exp1	2h	35	1007.89	2959.29	800.723
15	5	2hIR	190725	2	dDBDdCTD	exp1	2h	12	675.043	2606.88	1025.22
15	6	2hIR	190725	2	dDBDdCTD	exp1	2h	0	1079.82	3312.13	216.44
15	7	2hIR	190725	2	dDBDdCTD	exp1	2h	5	621.2	1555.27	1338.86
15	8	2hIR	190725	2	dDBDdCTD	exp1	2h	25	849.964	2626.36	896.248
15	9	2hIR	190725	2	dDBDdCTD	exp1	2h	6	539.745	2183.76	835.39
15	10	2hIR	190725	2	dDBDdCTD	exp1	2h	14	721.312	2806.88	1148.98
15	11	2hIR	190725	2	dDBDdCTD	exp1	2h	24	802.909	3682.21	983.606
15	12	2hIR	190725	2	dDBDdCTD	exp1	2h	7	620.546	1878.52	1451.64
15	13	2hIR	190725	2	dDBDdCTD	exp1	2h	21	1006.23	3291.78	1226.2
15	14	2hIR	190725	2	dDBDdCTD	exp1	2h	17	1058.96	3388.28	1887.3
15	15	2hIR	190725	2	dDBDdCTD	exp1	2h	0	940.284	3408.49	252.236
15	16	2hIR	190725	2	dDBDdCTD	exp1	2h	32	938.677	3173.64	611.546
15	17	2hIR	190725	2	dDBDdCTD	exp1	2h	27	1116.83	2886.39	825.244
15	18	2hIR	190725	2	dDBDdCTD	exp1	2h	27	1031.5	2609.71	2177.28
15	19	2hIR	190725	2	dDBDdCTD	exp1	2h	11	874.947	1621.35	1562.62
15	20	2hIR	190725	2	dDBDdCTD	exp1	2h	31	1026.49	2896.33	731.192
15	21	2hIR	190725	2	dDBDdCTD	exp1	2h	9	704.565	2400.88	533.992
15	22	2hIR	190725	2	dDBDdCTD	exp1	2h	11	896.034	1701.95	1599.01
16	1	noIR	190725	2	dDBDdCTD	exp1	noIR	9	699.846	1667.28	2579.88
16	2	noIR	190725	2	dDBDdCTD	exp1	noIR	6	548.445	785.278	3521.05
16	3	noIR	190725	2	dDBDdCTD	exp1	noIR	5	911.11	1118.9	2859.66
16	4	noIR	190725	2	dDBDdCTD	exp1	noIR	19	907.34	1809.84	2758.45
16	5	noIR	190725	2	dDBDdCTD	exp1	noIR	1	440.753	907.232	1812.72
16	6	noIR	190725	2	dDBDdCTD	exp1	noIR	9	695.228	1412.79	2791.05
16	7	noIR	190725	2	dDBDdCTD	exp1	noIR	9	542.352	811.354	3495.86
16	8	noIR	190725	2	dDBDdCTD	exp1	noIR	4	253.084	506.387	1390.94
16	9	noIR	190725	2	dDBDdCTD	exp1	noIR	6	560.831	832.607	2964.81
16	10	noIR	190725	2	dDBDdCTD	exp1	noIR	12	895.122	1433.8	3636.8
16	11	noIR	190725	2	dDBDdCTD	exp1	noIR	3	293.531	733.823	1935.03
16	12	noIR	190725	2	dDBDdCTD	exp1	noIR	0	364.288	1587.15	108.605
16	13	noIR	190725	2	dDBDdCTD	exp1	noIR	4	456.003	928.841	2081.07
16	14	noIR	190725	2	dDBDdCTD	exp1	noIR	5	515.766	1398.11	2696.99
16	15	noIR	190725	2	dDBDdCTD	exp1	noIR	3	356.616	1014.16	1682.1
16	16	noIR	190725	2	dDBDdCTD	exp1	noIR	2	321.189	1112.61	1070.15
16	17	noIR	190725	2	dDBDdCTD	exp1	noIR	2	483.598	991.574	3284.29
16	18	noIR	190725	2	dDBDdCTD	exp1	noIR	10	576.205	1405.85	2324.04
16	19	noIR	190725	2	dDBDdCTD	exp1	noIR	7	445.598	1625.89	2215.4
16	20	noIR	190725	2	dDBDdCTD	exp1	noIR	2	506.604	1191.14	2526.48
16	21	noIR	190725	2	dDBDdCTD	exp1	noIR	19	833.187	2025.22	3228.85
16	22	noIR	190725	2	dDBDdCTD	exp1	noIR	15	550.008	1178.74	2878.59
16	23	noIR	190725	2	dDBDdCTD	exp1	noIR	2	390.543	862.35	2280.94
16	24	noIR	190725	2	dDBDdCTD	exp1	noIR	3	300.526	564.083	1046.95
16	25	noIR	190725	2	dDBDdCTD	exp1	noIR	4	532.433	1194.78	2777.62
16	26	noIR	190725	2	dDBDdCTD	exp1	noIR	2	642.008	926.662	2057.66
16	27	noIR	190725	2	dDBDdCTD	exp1	noIR	25	1115.62	2646.85	4475.81
16	28	noIR	190725	2	dDBDdCTD	exp1	noIR	7	570.193	1869.7	2813.32
16	29	noIR	190725	2	dDBDdCTD	exp1	noIR	0	279.749	571.731	819.055
16	30	noIR	190725	2	dDBDdCTD	exp1	noIR	17	630.082	1738.67	1945.22
16	31	noIR	190725	2	dDBDdCTD	exp1	noIR	14	663.096	1585.47	3909.79
16	32	noIR	190725	2	dDBDdCTD	exp1	noIR	29	827.549	2065.58	3931.4
16	33	noIR	190725	2	dDBDdCTD	exp1	noIR	2	842.77	1904.74	751.737
16	34	noIR	190725	2	dDBDdCTD	exp1	noIR	11	730.219	1454.41	4038.64
16	35	noIR	190725	2	dDBDdCTD	exp1	noIR	12	661.695	2077.96	2653.11
16	36	noIR	190725	2	dDBDdCTD	exp1	noIR	16	1292.48	2745.86	798.029
16	37	noIR	190725	2	dDBDdCTD	exp1	noIR	1	917.125	2062.28	221.47
16	38	noIR	190725	2	dDBDdCTD	exp1	noIR	1	152.107	602.963	43.2966
16	39	noIR	190725	2	dDBDdCTD	exp1	noIR	12	770.818	1603.61	3906.17
16	40	noIR	190725	2	dDBDdCTD	exp1	noIR	0	172.337	422.059	44.2652
16	41	noIR	190725	2	dDBDdCTD	exp1	noIR	0	138.693	337.378	37.8681
16	42	noIR	190725	2	dDBDdCTD	exp1	noIR	2	1566.71	2131.39	243.941
16	43	noIR	190725	2	dDBDdCTD	exp1	noIR	0	190.644	731.438	61.1837
17	1	2hIR	190725	3	WT	exp1	2h	4	672.888	1088.95	95.7019
17	2	2hIR	190725	3	WT	exp1	2h	7	484.293	918.503	72.1407
17	3	2hIR	190725	3	WT	exp1	2h	21	1173.09	2459.42	711.744
17	4	2hIR	190725	3	WT	exp1	2h	36	958.855	3228.89	1393.75
17	5	2hIR	190725	3	WT	exp1	2h	7	777.241	1934.82	2385.05
17	6	2hIR	190725	3	WT	exp1	2h	0	99.5484	514.045	222.839
17	7	2hIR	190725	3	WT	exp1	2h	24	1049.14	2778.49	252.111
17	8	2hIR	190725	3	WT	exp1	2h	32	982.5	2279.11	1917.27
17	9	2hIR	190725	3	WT	exp1	2h	6	1266.66	2933.47	172.261
17	10	2hIR	190725	3	WT	exp1	2h	1	282.289	888.595	629.289
17	11	2hIR	190725	3	WT	exp1	2h	28	903.341	2399.1	871.566
17	12	2hIR	190725	3	WT	exp1	2h	1	364.718	1320.06	127.307
17	13	2hIR	190725	3	WT	exp1	2h	4	499.826	1591.4	157.962
17	14	2hIR	190725	3	WT	exp1	2h	0	266.341	1175.44	587.029
17	15	2hIR	190725	3	WT	exp1	2h	0	123.95	478.557	72.8283
17	16	2hIR	190725	3	WT	exp1	2h	7	419.238	1195.99	1128.59
17	17	2hIR	190725	3	WT	exp1	2h	15	673.724	1773.53	1743.61
17	18	2hIR	190725	3	WT	exp1	2h	0	1259.39	3222.77	191.819
17	19	2hIR	190725	3	WT	exp1	2h	18	811.063	3883.78	2218.14
17	20	2hIR	190725	3	WT	exp1	2h	23	1066.99	2768.4	1989.6
17	21	2hIR	190725	3	WT	exp1	2h	23	874.018	2821.69	1268.19
17	22	2hIR	190725	3	WT	exp1	2h	34	1241.21	3737.78	1260.15
17	23	2hIR	190725	3	WT	exp1	2h	5	599.587	2205.97	1600.14
17	24	2hIR	190725	3	WT	exp1	2h	2	512.81	2324.45	1165.07
17	25	2hIR	190725	3	WT	exp1	2h	16	791.528	3150.77	1373.79
17	26	2hIR	190725	3	WT	exp1	2h	28	1237.39	3763.54	189.657
17	27	2hIR	190725	3	WT	exp1	2h	9	587.181	2359.51	3000.93
17	28	2hIR	190725	3	WT	exp1	2h	10	802.494	2901.32	580.145
17	29	2hIR	190725	3	WT	exp1	2h	6	396.819	1582.53	121.918
17	30	2hIR	190725	3	WT	exp1	2h	14	631.018	2094.38	1778.55
17	31	2hIR	190725	3	WT	exp1	2h	13	794.164	2628.96	2572.78
17	32	2hIR	190725	3	WT	exp1	2h	23	1063.83	3490.14	1724.65
17	33	2hIR	190725	3	WT	exp1	2h	4	702.544	2527.99	1023.05
17	34	2hIR	190725	3	WT	exp1	2h	18	1159.67	2893.43	170.782
17	35	2hIR	190725	3	WT	exp1	2h	26	1190.23	3687.21	2011.76
17	36	2hIR	190725	3	WT	exp1	2h	21	858.184	2478.38	1621.96
17	37	2hIR	190725	3	WT	exp1	2h	27	1073.29	2920.85	1302.16
17	38	2hIR	190725	3	WT	exp1	2h	17	644.941	1588.7	1450.63
17	39	2hIR	190725	3	WT	exp1	2h	20	1006.68	3271.76	3167.23
17	40	2hIR	190725	3	WT	exp1	2h	0	249.339	758.204	729.821
17	41	2hIR	190725	3	WT	exp1	2h	18	709.626	2459.77	1440.9
17	42	2hIR	190725	3	WT	exp1	2h	7	953.332	3020.3	177.634
17	43	2hIR	190725	3	WT	exp1	2h	0	228.398	717.173	516.177
17	44	2hIR	190725	3	WT	exp1	2h	26	1183.28	2360.15	1475.07
17	45	2hIR	190725	3	WT	exp1	2h	17	890.505	2962.01	1665.24
17	46	2hIR	190725	3	WT	exp1	2h	8	444.442	1429.22	108.233
17	47	2hIR	190725	3	WT	exp1	2h	27	1248.84	2237.08	1164.21
17	48	2hIR	190725	3	WT	exp1	2h	11	535.187	1368.92	1066.86
17	49	2hIR	190725	3	WT	exp1	2h	6	450.071	1468.31	1547.44
17	50	2hIR	190725	3	WT	exp1	2h	3	155.12	643.885	497.459
18	1	noIR	190725	3	WT	exp1	noIR	15	2253.53	1706.6	2530.07
18	2	noIR	190725	3	WT	exp1	noIR	2	2642.03	2174.04	230.096
18	3	noIR	190725	3	WT	exp1	noIR	0	3290.31	549.144	77.0694
18	4	noIR	190725	3	WT	exp1	noIR	27	5913.21	3986.59	3903.33
18	5	noIR	190725	3	WT	exp1	noIR	4	1392.37	1564.29	100.31
18	6	noIR	190725	3	WT	exp1	noIR	1	2237.85	1590.32	1390.03
18	7	noIR	190725	3	WT	exp1	noIR	7	2133.45	1849.62	190.92
18	8	noIR	190725	3	WT	exp1	noIR	1	1510	1667.89	2331.29
18	9	noIR	190725	3	WT	exp1	noIR	0	1113.68	1477.11	1854.42
18	10	noIR	190725	3	WT	exp1	noIR	8	2092.09	2466.98	1833.23
18	11	noIR	190725	3	WT	exp1	noIR	1	2765.32	3081.06	231.93
18	12	noIR	190725	3	WT	exp1	noIR	14	3383.54	3319.23	1400.84
18	13	noIR	190725	3	WT	exp1	noIR	1	1718.4	1654.27	1529.42
18	14	noIR	190725	3	WT	exp1	noIR	2	430.786	374.871	30.654
18	15	noIR	190725	3	WT	exp1	noIR	2	2763	2449.8	220.257
18	16	noIR	190725	3	WT	exp1	noIR	3	1709.8	1861.66	1558.3
18	17	noIR	190725	3	WT	exp1	noIR	0	720.044	966.577	55.388
18	18	noIR	190725	3	WT	exp1	noIR	0	1723.86	1704.59	2142.33
18	19	noIR	190725	3	WT	exp1	noIR	5	2569.43	3095.82	204.228
18	20	noIR	190725	3	WT	exp1	noIR	10	3261.22	3756.91	367.595
18	21	noIR	190725	3	WT	exp1	noIR	6	3025.14	3687.69	670.707
18	22	noIR	190725	3	WT	exp1	noIR	0	1607.98	1765.42	1957.62
18	23	noIR	190725	3	WT	exp1	noIR	0	886.465	942.99	72.2106
18	24	noIR	190725	3	WT	exp1	noIR	8	1842.72	1741.53	2204.18
18	25	noIR	190725	3	WT	exp1	noIR	15	1799.19	954.772	862.554
18	26	noIR	190725	3	WT	exp1	noIR	5	1777.37	2118.73	1446.21
18	27	noIR	190725	3	WT	exp1	noIR	4	2851.32	3510.3	3703.74
18	28	noIR	190725	3	WT	exp1	noIR	13	2012.3	1108.27	1117.62
19	1	2hIR	190725	3	dCTD	exp1	2h	2	341.812	518.377	590.984
19	2	2hIR	190725	3	dCTD	exp1	2h	0	514.182	1020.23	502.278
19	3	2hIR	190725	3	dCTD	exp1	2h	0	367.598	1078.1	92.5872
19	4	2hIR	190725	3	dCTD	exp1	2h	21	772.267	1493.66	2110.89
19	5	2hIR	190725	3	dCTD	exp1	2h	2	1070.18	2813.21	674.777
19	6	2hIR	190725	3	dCTD	exp1	2h	0	655.043	1718.78	153.02
19	7	2hIR	190725	3	dCTD	exp1	2h	0	791.842	1455.36	185.684
19	8	2hIR	190725	3	dCTD	exp1	2h	4	815.467	2115.57	403.038
19	9	2hIR	190725	3	dCTD	exp1	2h	1	803.235	1308.06	146.113
19	10	2hIR	190725	3	dCTD	exp1	2h	19	715.179	1437.85	950.938
19	11	2hIR	190725	3	dCTD	exp1	2h	5	496.967	1261.58	1339.97
19	12	2hIR	190725	3	dCTD	exp1	2h	3	585.587	1812	548.288
19	13	2hIR	190725	3	dCTD	exp1	2h	9	654.361	1676.12	1332.41
19	14	2hIR	190725	3	dCTD	exp1	2h	3	630.228	1110.64	143.484
19	15	2hIR	190725	3	dCTD	exp1	2h	6	495.188	880.66	95.1695
19	16	2hIR	190725	3	dCTD	exp1	2h	13	777.954	2135.68	1627.17
19	17	2hIR	190725	3	dCTD	exp1	2h	30	911.535	2053.53	971.003
19	18	2hIR	190725	3	dCTD	exp1	2h	9	546.298	1924.34	1355.5
19	19	2hIR	190725	3	dCTD	exp1	2h	4	493.8	1176.69	1235.51
19	20	2hIR	190725	3	dCTD	exp1	2h	16	595.195	1217.13	1415.97
19	21	2hIR	190725	3	dCTD	exp1	2h	26	967.59	1618.45	1015.85
19	22	2hIR	190725	3	dCTD	exp1	2h	6	748.622	1857.73	212.587
19	23	2hIR	190725	3	dCTD	exp1	2h	23	775.753	1431.59	880.206
19	24	2hIR	190725	3	dCTD	exp1	2h	25	841.741	1886.52	1221.87
19	25	2hIR	190725	3	dCTD	exp1	2h	57	1342.48	3942.14	2405.88
19	26	2hIR	190725	3	dCTD	exp1	2h	15	714.95	1392.83	136.589
19	27	2hIR	190725	3	dCTD	exp1	2h	18	679.368	1554.35	821.697
19	28	2hIR	190725	3	dCTD	exp1	2h	8	810.851	1583.69	1106.23
19	29	2hIR	190725	3	dCTD	exp1	2h	50	1733.42	4055.3	1320.97
19	30	2hIR	190725	3	dCTD	exp1	2h	55	1642.41	4559.25	2569.7
19	31	2hIR	190725	3	dCTD	exp1	2h	12	839.374	1702.41	1325.46
20	1	noIR	190725	3	dCTD	exp1	noIR	12	760.985	1792.52	2959.89
20	2	noIR	190725	3	dCTD	exp1	noIR	9	646.809	1097.94	1661.05
20	3	noIR	190725	3	dCTD	exp1	noIR	18	781.386	1724.61	2113.75
20	4	noIR	190725	3	dCTD	exp1	noIR	17	733.292	1650.67	1741.14
20	5	noIR	190725	3	dCTD	exp1	noIR	32	1883.68	3533.82	4011.53
20	6	noIR	190725	3	dCTD	exp1	noIR	16	740.221	1857.28	1704.97
20	7	noIR	190725	3	dCTD	exp1	noIR	24	1065.89	2272.98	1312.73
20	8	noIR	190725	3	dCTD	exp1	noIR	2	490.427	1187.97	289.094
20	9	noIR	190725	3	dCTD	exp1	noIR	3	886.895	2252.09	209.365
20	10	noIR	190725	3	dCTD	exp1	noIR	12	586.187	1633.2	1760.79
20	11	noIR	190725	3	dCTD	exp1	noIR	1	262.775	298.038	59.672
20	12	noIR	190725	3	dCTD	exp1	noIR	9	700.589	1903.77	1125.45
20	13	noIR	190725	3	dCTD	exp1	noIR	4	390.219	1546.08	1319.83
20	14	noIR	190725	3	dCTD	exp1	noIR	25	742.551	1504.57	1826.63
20	15	noIR	190725	3	dCTD	exp1	noIR	7	664.168	1377.37	1839.82
20	16	noIR	190725	3	dCTD	exp1	noIR	0	1092.34	1982.23	218.08
20	17	noIR	190725	3	dCTD	exp1	noIR	3	643.801	2742.46	851.35
20	18	noIR	190725	3	dCTD	exp1	noIR	18	721.497	1450.18	2246.81
20	19	noIR	190725	3	dCTD	exp1	noIR	22	693.118	2281.09	1476
20	20	noIR	190725	3	dCTD	exp1	noIR	6	763.99	1704.36	1223.03
20	21	noIR	190725	3	dCTD	exp1	noIR	0	260.92	1024.72	78.86
20	22	noIR	190725	3	dCTD	exp1	noIR	14	715.306	2346.27	2407.47
20	23	noIR	190725	3	dCTD	exp1	noIR	5	459.536	977.97	527.262
20	24	noIR	190725	3	dCTD	exp1	noIR	1	984.904	1391.15	191.806
20	25	noIR	190725	3	dCTD	exp1	noIR	2	379.498	1133.94	720.872
20	26	noIR	190725	3	dCTD	exp1	noIR	13	790.918	1612.35	951.981
20	27	noIR	190725	3	dCTD	exp1	noIR	16	612.918	1793.68	1860.65
21	1	2hIR	190725	3	dDBD	exp1	2h	6	510.29	1312	1889.53
21	2	2hIR	190725	3	dDBD	exp1	2h	9	534.546	1554.15	2367.27
21	3	2hIR	190725	3	dDBD	exp1	2h	8	569.175	1316.54	1929.54
21	4	2hIR	190725	3	dDBD	exp1	2h	7	519.124	1448.99	1338.94
21	5	2hIR	190725	3	dDBD	exp1	2h	7	527.841	2058.56	2484.9
21	6	2hIR	190725	3	dDBD	exp1	2h	16	573.125	1757.44	1238.19
21	7	2hIR	190725	3	dDBD	exp1	2h	11	462.758	1778.13	1151.35
21	8	2hIR	190725	3	dDBD	exp1	2h	7	677.656	2312.9	1063.6
21	9	2hIR	190725	3	dDBD	exp1	2h	5	797.176	2697.93	227.386
21	10	2hIR	190725	3	dDBD	exp1	2h	16	628.596	1701.52	2312.52
21	11	2hIR	190725	3	dDBD	exp1	2h	3	470.179	1332.51	1436.24
21	12	2hIR	190725	3	dDBD	exp1	2h	22	764.189	2702.72	800.324
21	13	2hIR	190725	3	dDBD	exp1	2h	6	719.657	2648.74	169.805
21	14	2hIR	190725	3	dDBD	exp1	2h	19	609.46	2100.26	2699.23
21	15	2hIR	190725	3	dDBD	exp1	2h	6	836.539	2652.36	169.641
21	16	2hIR	190725	3	dDBD	exp1	2h	9	1007.63	2782.81	212.432
21	17	2hIR	190725	3	dDBD	exp1	2h	3	342.964	931.738	80.7301
21	18	2hIR	190725	3	dDBD	exp1	2h	14	410.988	1195.53	1283.85
21	19	2hIR	190725	3	dDBD	exp1	2h	22	726.74	2803.84	768.92
21	20	2hIR	190725	3	dDBD	exp1	2h	6	968.299	3444.73	211.727
21	21	2hIR	190725	3	dDBD	exp1	2h	14	409.343	1196.08	1185.48
21	22	2hIR	190725	3	dDBD	exp1	2h	1	365.903	2246.86	2050.85
21	23	2hIR	190725	3	dDBD	exp1	2h	5	259.398	1425.04	706.744
21	24	2hIR	190725	3	dDBD	exp1	2h	7	569.088	2011.47	1991.5
21	25	2hIR	190725	3	dDBD	exp1	2h	1	383.436	1352.33	1825.94
21	26	2hIR	190725	3	dDBD	exp1	2h	28	736.442	2373.22	2056.38
21	27	2hIR	190725	3	dDBD	exp1	2h	4	501.82	2877.09	2793.48
21	28	2hIR	190725	3	dDBD	exp1	2h	23	779.1	2284.49	516.45
21	29	2hIR	190725	3	dDBD	exp1	2h	6	475.837	1516.59	1664.26
21	30	2hIR	190725	3	dDBD	exp1	2h	11	589.411	2952.82	2548.06
21	31	2hIR	190725	3	dDBD	exp1	2h	8	519.936	2844.33	2324.42
21	32	2hIR	190725	3	dDBD	exp1	2h	27	662.946	2504.12	2263.24
21	33	2hIR	190725	3	dDBD	exp1	2h	8	401.546	1204.66	1650.45
21	34	2hIR	190725	3	dDBD	exp1	2h	12	463.856	2234.25	1398.5
21	35	2hIR	190725	3	dDBD	exp1	2h	19	1242.82	5752.64	2099.35
21	36	2hIR	190725	3	dDBD	exp1	2h	9	853.311	1980.5	172.439
21	37	2hIR	190725	3	dDBD	exp1	2h	10	522.374	2977.21	2640.31
21	38	2hIR	190725	3	dDBD	exp1	2h	7	289.301	878.559	1116.63
21	39	2hIR	190725	3	dDBD	exp1	2h	5	633.537	2838.19	146.292
21	40	2hIR	190725	3	dDBD	exp1	2h	16	616.313	2411.8	718.85
21	41	2hIR	190725	3	dDBD	exp1	2h	13	888.982	3419	187.384
21	42	2hIR	190725	3	dDBD	exp1	2h	15	528.057	2026.29	674.432
21	43	2hIR	190725	3	dDBD	exp1	2h	7	567.575	2635.57	416.201
21	44	2hIR	190725	3	dDBD	exp1	2h	21	866.147	3342.66	165.289
21	45	2hIR	190725	3	dDBD	exp1	2h	11	474.218	1564.28	110.029
21	46	2hIR	190725	3	dDBD	exp1	2h	3	435.576	2372.02	2432.85
21	47	2hIR	190725	3	dDBD	exp1	2h	11	618.59	2340.98	147.393
21	48	2hIR	190725	3	dDBD	exp1	2h	11	637.404	2631.85	161.245
21	49	2hIR	190725	3	dDBD	exp1	2h	30	945.869	2634.82	417.994
21	50	2hIR	190725	3	dDBD	exp1	2h	21	643.094	1469.26	1851.57
21	51	2hIR	190725	3	dDBD	exp1	2h	15	570.152	1750.59	1775.84
21	52	2hIR	190725	3	dDBD	exp1	2h	17	426.668	1697.29	1521.25
22	1	noIR	190725	3	dDBD	exp1	noIR	0	418.531	953.916	88.3995
22	2	noIR	190725	3	dDBD	exp1	noIR	0	809.521	1935.33	164.988
22	3	noIR	190725	3	dDBD	exp1	noIR	0	187.711	956.092	48.7981
22	4	noIR	190725	3	dDBD	exp1	noIR	0	222.552	991.515	51.9704
22	5	noIR	190725	3	dDBD	exp1	noIR	1	909.647	2918.25	210.987
22	6	noIR	190725	3	dDBD	exp1	noIR	12	932.586	2766.42	3578.9
22	7	noIR	190725	3	dDBD	exp1	noIR	16	1042.5	2966.13	3522.16
22	8	noIR	190725	3	dDBD	exp1	noIR	12	936.606	2521.87	3753.79
22	9	noIR	190725	3	dDBD	exp1	noIR	7	772.632	2485.62	3624.45
22	10	noIR	190725	3	dDBD	exp1	noIR	7	778.981	2614.89	2980.57
22	11	noIR	190725	3	dDBD	exp1	noIR	8	802.709	2429.44	3322.1
22	12	noIR	190725	3	dDBD	exp1	noIR	7	717.085	2611.08	3525.15
22	13	noIR	190725	3	dDBD	exp1	noIR	11	777.548	2360.92	3115.15
22	14	noIR	190725	3	dDBD	exp1	noIR	5	752.13	1730.15	3715.2
22	15	noIR	190725	3	dDBD	exp1	noIR	12	852.312	3239.87	2567.78
22	16	noIR	190725	3	dDBD	exp1	noIR	20	1116.38	2736.1	3121.33
22	17	noIR	190725	3	dDBD	exp1	noIR	12	847.321	2431.98	3192.22
22	18	noIR	190725	3	dDBD	exp1	noIR	6	820.072	3027.07	3287.59
22	19	noIR	190725	3	dDBD	exp1	noIR	6	782.897	1529.57	3768.5
22	20	noIR	190725	3	dDBD	exp1	noIR	20	863.221	2656.51	3533.66
22	21	noIR	190725	3	dDBD	exp1	noIR	13	1017.48	3368.93	208.285
22	22	noIR	190725	3	dDBD	exp1	noIR	12	851.404	2541.22	3104.85
22	23	noIR	190725	3	dDBD	exp1	noIR	19	1031.43	3728.17	1907.16
22	24	noIR	190725	3	dDBD	exp1	noIR	0	292.371	1422.28	74.5759
22	25	noIR	190725	3	dDBD	exp1	noIR	6	946.124	2409.31	3703.27
22	26	noIR	190725	3	dDBD	exp1	noIR	11	1023.99	2949.35	252.383
22	27	noIR	190725	3	dDBD	exp1	noIR	12	1072.43	2854.24	4108.41
23	1	2hIR	190725	3	dDBDdCTD	exp1	2h	0	316.338	1124.51	404.558
23	2	2hIR	190725	3	dDBDdCTD	exp1	2h	0	267.81	849.259	321.322
23	3	2hIR	190725	3	dDBDdCTD	exp1	2h	22	758.593	2376.85	940.125
23	4	2hIR	190725	3	dDBDdCTD	exp1	2h	13	826.101	1933.02	1381.76
23	5	2hIR	190725	3	dDBDdCTD	exp1	2h	9	630.781	1695.15	1243.31
23	6	2hIR	190725	3	dDBDdCTD	exp1	2h	19	883.631	2914.81	1014.6
23	7	2hIR	190725	3	dDBDdCTD	exp1	2h	3	532.282	1272.26	151.751
23	8	2hIR	190725	3	dDBDdCTD	exp1	2h	14	953.829	2869.54	1234.18
23	9	2hIR	190725	3	dDBDdCTD	exp1	2h	4	647.352	1307.47	138.331
23	10	2hIR	190725	3	dDBDdCTD	exp1	2h	36	1348.85	4341.33	1591.67
23	11	2hIR	190725	3	dDBDdCTD	exp1	2h	18	565.699	2062.52	367.773
23	12	2hIR	190725	3	dDBDdCTD	exp1	2h	6	1009.18	2676.21	220.141
23	13	2hIR	190725	3	dDBDdCTD	exp1	2h	8	643.074	1283.09	112.377
23	14	2hIR	190725	3	dDBDdCTD	exp1	2h	4	906.018	3023.34	249.243
23	15	2hIR	190725	3	dDBDdCTD	exp1	2h	0	404.114	985.346	102.674
23	16	2hIR	190725	3	dDBDdCTD	exp1	2h	19	658.386	2042.74	1481.14
23	17	2hIR	190725	3	dDBDdCTD	exp1	2h	3	892.466	3798.07	225.984
23	18	2hIR	190725	3	dDBDdCTD	exp1	2h	18	837.595	3478.15	634.957
23	19	2hIR	190725	3	dDBDdCTD	exp1	2h	13	598.284	1898.34	1232.34
23	20	2hIR	190725	3	dDBDdCTD	exp1	2h	9	585.865	1725.71	1201.74
23	21	2hIR	190725	3	dDBDdCTD	exp1	2h	17	747.189	3258.85	828.623
23	22	2hIR	190725	3	dDBDdCTD	exp1	2h	14	827.085	3564.27	594.241
23	23	2hIR	190725	3	dDBDdCTD	exp1	2h	24	1000.49	3300.98	714.629
23	24	2hIR	190725	3	dDBDdCTD	exp1	2h	12	859.5	3039.67	251.647
23	25	2hIR	190725	3	dDBDdCTD	exp1	2h	26	955.011	3734.81	562.471
23	26	2hIR	190725	3	dDBDdCTD	exp1	2h	1	1219.79	3329.19	253.992
23	27	2hIR	190725	3	dDBDdCTD	exp1	2h	26	1025.12	3255.29	1674.4
23	28	2hIR	190725	3	dDBDdCTD	exp1	2h	13	782.389	2286.51	1224.98
23	29	2hIR	190725	3	dDBDdCTD	exp1	2h	5	717.015	2916.73	209.145
24	1	noIR	190725	3	dDBDdCTD	exp1	noIR	0	602.645	739.438	182.875
24	2	noIR	190725	3	dDBDdCTD	exp1	noIR	3	520.88	936.048	2040.45
24	3	noIR	190725	3	dDBDdCTD	exp1	noIR	2	559.757	739.338	1489.22
24	4	noIR	190725	3	dDBDdCTD	exp1	noIR	15	761.257	1090.97	1883.89
24	5	noIR	190725	3	dDBDdCTD	exp1	noIR	5	709.964	1050.29	2022.27
24	6	noIR	190725	3	dDBDdCTD	exp1	noIR	0	635.472	1485.06	213.629
24	7	noIR	190725	3	dDBDdCTD	exp1	noIR	4	588.913	1168.64	2163.31
24	8	noIR	190725	3	dDBDdCTD	exp1	noIR	0	267.48	1462.08	80.5043
24	9	noIR	190725	3	dDBDdCTD	exp1	noIR	10	567.385	924.908	2809.81
24	10	noIR	190725	3	dDBDdCTD	exp1	noIR	8	688.872	1655.67	204.22
24	11	noIR	190725	3	dDBDdCTD	exp1	noIR	0	944.911	1993.83	217.814
24	12	noIR	190725	3	dDBDdCTD	exp1	noIR	0	691.741	1299.32	185.755
24	13	noIR	190725	3	dDBDdCTD	exp1	noIR	0	671.641	1049.63	154.564
24	14	noIR	190725	3	dDBDdCTD	exp1	noIR	25	846.878	2215.96	3294.89
24	15	noIR	190725	3	dDBDdCTD	exp1	noIR	3	538.302	1797.32	3542.47
24	16	noIR	190725	3	dDBDdCTD	exp1	noIR	1	296.542	581.665	756.343
24	17	noIR	190725	3	dDBDdCTD	exp1	noIR	2	1199.6	2128.27	230.821
24	18	noIR	190725	3	dDBDdCTD	exp1	noIR	1	523.188	1172.74	106.722
24	19	noIR	190725	3	dDBDdCTD	exp1	noIR	1	244.154	504.979	671.486
24	20	noIR	190725	3	dDBDdCTD	exp1	noIR	12	604.691	1388.42	3915.46
24	21	noIR	190725	3	dDBDdCTD	exp1	noIR	2	317.992	768.855	1639.34
24	22	noIR	190725	3	dDBDdCTD	exp1	noIR	8	957.577	2412.31	225.691
24	23	noIR	190725	3	dDBDdCTD	exp1	noIR	1	633.745	2004.66	170.911
24	24	noIR	190725	3	dDBDdCTD	exp1	noIR	12	646.377	2046.76	3452.54
24	25	noIR	190725	3	dDBDdCTD	exp1	noIR	0	844.449	1627.57	176.091
24	26	noIR	190725	3	dDBDdCTD	exp1	noIR	18	738.537	1894.7	3325.4
24	27	noIR	190725	3	dDBDdCTD	exp1	noIR	1	311.812	982.242	1409.67
24	28	noIR	190725	3	dDBDdCTD	exp1	noIR	4	466.568	1608.71	3161.78
24	29	noIR	190725	3	dDBDdCTD	exp1	noIR	5	583.996	1463.47	241.466
24	30	noIR	190725	3	dDBDdCTD	exp1	noIR	0	229.462	697.336	918.515
24	31	noIR	190725	3	dDBDdCTD	exp1	noIR	7	615.824	1826.12	2660.43
24	32	noIR	190725	3	dDBDdCTD	exp1	noIR	11	536.537	1971.92	2703.28
24	33	noIR	190725	3	dDBDdCTD	exp1	noIR	22	1165.15	2978.99	6326.18
24	34	noIR	190725	3	dDBDdCTD	exp1	noIR	9	363.201	1184.39	2728.66
24	35	noIR	190725	3	dDBDdCTD	exp1	noIR	0	149.236	797.79	75.5471
24	36	noIR	190725	3	dDBDdCTD	exp1	noIR	12	569.225	1721.84	1537
24	37	noIR	190725	3	dDBDdCTD	exp1	noIR	0	97.2189	584.189	48.5021
24	38	noIR	190725	3	dDBDdCTD	exp1	noIR	14	624.886	1801.89	2454.61
24	39	noIR	190725	3	dDBDdCTD	exp1	noIR	0	87.0676	474.224	43.2228
24	40	noIR	190725	3	dDBDdCTD	exp1	noIR	17	713.747	2181.03	2411.86
24	41	noIR	190725	3	dDBDdCTD	exp1	noIR	4	286.516	566.455	1594.02
24	42	noIR	190725	3	dDBDdCTD	exp1	noIR	2	347.621	700.649	1995.08
24	43	noIR	190725	3	dDBDdCTD	exp1	noIR	21	721.318	1859.14	3091.4
24	44	noIR	190725	3	dDBDdCTD	exp1	noIR	1	355.148	773.789	90.6627
24	45	noIR	190725	3	dDBDdCTD	exp1	noIR	9	679.379	1282.21	4275.38
24	46	noIR	190725	3	dDBDdCTD	exp1	noIR	6	529.43	1005.2	3485.39
25	1	2hIR	190725	4	WT	exp1	2h	26	850.937	1803.41	1862.98
25	2	2hIR	190725	4	WT	exp1	2h	20	756.368	1714	1397.84
25	3	2hIR	190725	4	WT	exp1	2h	9	479.476	1286.81	97.9152
25	4	2hIR	190725	4	WT	exp1	2h	6	1179.11	3597.63	232.235
25	5	2hIR	190725	4	WT	exp1	2h	16	993.768	3225.73	1663.29
25	6	2hIR	190725	4	WT	exp1	2h	4	572.961	2152.18	327.754
25	7	2hIR	190725	4	WT	exp1	2h	0	171.607	525.994	193.615
25	8	2hIR	190725	4	WT	exp1	2h	33	1406.53	3762.52	2702.64
25	9	2hIR	190725	4	WT	exp1	2h	15	1367.51	2748.85	1965.18
25	10	2hIR	190725	4	WT	exp1	2h	1	161.242	338.801	211.282
25	11	2hIR	190725	4	WT	exp1	2h	42	1519.51	4381.06	2165.57
25	12	2hIR	190725	4	WT	exp1	2h	16	686.024	2762.04	1133.43
25	13	2hIR	190725	4	WT	exp1	2h	8	1106.23	3805	201.641
25	14	2hIR	190725	4	WT	exp1	2h	56	1774.31	4728.07	2498.03
25	15	2hIR	190725	4	WT	exp1	2h	0	730.099	1928.28	137.277
25	16	2hIR	190725	4	WT	exp1	2h	5	943.01	2392.06	202.956
25	17	2hIR	190725	4	WT	exp1	2h	16	754.332	2465.33	1638.49
25	18	2hIR	190725	4	WT	exp1	2h	26	1392.51	4177.88	2401.46
25	19	2hIR	190725	4	WT	exp1	2h	22	1465.06	2909.74	2109.07
25	20	2hIR	190725	4	WT	exp1	2h	5	780.811	2502.54	1704.61
25	21	2hIR	190725	4	WT	exp1	2h	28	1472.48	3428.71	1922.53
25	22	2hIR	190725	4	WT	exp1	2h	29	1360.34	4316.69	1978.72
25	23	2hIR	190725	4	WT	exp1	2h	20	934.109	2741.26	1551.45
25	24	2hIR	190725	4	WT	exp1	2h	5	561.806	1954.44	573.818
25	25	2hIR	190725	4	WT	exp1	2h	3	1506.06	3014.29	185.661
25	26	2hIR	190725	4	WT	exp1	2h	0	1062.45	3632.92	214.286
25	27	2hIR	190725	4	WT	exp1	2h	23	838.191	2726.07	1547.36
25	28	2hIR	190725	4	WT	exp1	2h	13	1003.5	3394.02	177.022
25	29	2hIR	190725	4	WT	exp1	2h	21	1013.06	2441.94	1210.86
25	30	2hIR	190725	4	WT	exp1	2h	14	731.065	2570.1	1380.16
25	31	2hIR	190725	4	WT	exp1	2h	15	966.188	3596.81	1559.17
25	32	2hIR	190725	4	WT	exp1	2h	21	733.265	2409.6	1161.18
25	33	2hIR	190725	4	WT	exp1	2h	2	220.711	680.292	424.686
25	34	2hIR	190725	4	WT	exp1	2h	2	443.669	1436.72	1066.51
25	35	2hIR	190725	4	WT	exp1	2h	24	1073.56	2512.05	1556.39
25	36	2hIR	190725	4	WT	exp1	2h	47	1748.94	4441.88	4747.49
26	1	noIR	190725	4	WT	exp1	noIR	0	667.36	469.305	53.7148
26	2	noIR	190725	4	WT	exp1	noIR	5	1819.39	1390.84	458.651
26	3	noIR	190725	4	WT	exp1	noIR	0	932.776	678.43	64.102
26	4	noIR	190725	4	WT	exp1	noIR	2	2018.78	1700.34	645.936
26	5	noIR	190725	4	WT	exp1	noIR	2	2225.02	1785.82	1858.91
26	6	noIR	190725	4	WT	exp1	noIR	4	3080.04	2874.88	1510.93
26	7	noIR	190725	4	WT	exp1	noIR	2	1529.91	1378.34	2459.24
26	8	noIR	190725	4	WT	exp1	noIR	7	2731.14	2612.46	2711.54
26	9	noIR	190725	4	WT	exp1	noIR	10	2675.6	2221.47	2619.41
26	10	noIR	190725	4	WT	exp1	noIR	9	3154.52	2823.01	2677.68
26	11	noIR	190725	4	WT	exp1	noIR	4	2309.6	1932.96	2908.7
26	12	noIR	190725	4	WT	exp1	noIR	7	2776.14	2950.72	2300.07
26	13	noIR	190725	4	WT	exp1	noIR	6	2713.82	2360.55	2296.51
26	14	noIR	190725	4	WT	exp1	noIR	5	2471.14	2129.03	2921.27
26	15	noIR	190725	4	WT	exp1	noIR	18	2315.02	1629.27	176.54
26	16	noIR	190725	4	WT	exp1	noIR	9	2341.78	1640.03	144.421
26	17	noIR	190725	4	WT	exp1	noIR	0	1956.03	2108.84	2654.88
26	18	noIR	190725	4	WT	exp1	noIR	6	2476.61	2697.83	4775.8
26	19	noIR	190725	4	WT	exp1	noIR	1	2241.19	2055.85	2337.92
26	20	noIR	190725	4	WT	exp1	noIR	3	2728.02	2557.41	4076.59
26	21	noIR	190725	4	WT	exp1	noIR	11	2676.89	3632.8	3171.51
26	22	noIR	190725	4	WT	exp1	noIR	21	5367.01	3554.13	994.921
26	23	noIR	190725	4	WT	exp1	noIR	16	6206.89	5491.29	1009.66
26	24	noIR	190725	4	WT	exp1	noIR	5	1852.77	1439.07	2737.36
26	25	noIR	190725	4	WT	exp1	noIR	7	3149.33	2950.93	2400.72
26	26	noIR	190725	4	WT	exp1	noIR	3	2289.98	2351.85	3594.63
26	27	noIR	190725	4	WT	exp1	noIR	4	1835.95	1566.74	3207.43
27	1	2hIR	190725	4	dCTD	exp1	2h	2	468.446	774.011	86.1592
27	2	2hIR	190725	4	dCTD	exp1	2h	17	1273.19	2463.34	186.141
27	3	2hIR	190725	4	dCTD	exp1	2h	17	1431.36	2710.06	3745.94
27	4	2hIR	190725	4	dCTD	exp1	2h	1	211.053	380.896	666.03
27	5	2hIR	190725	4	dCTD	exp1	2h	3	468.162	945.624	73.7488
27	6	2hIR	190725	4	dCTD	exp1	2h	1	529.924	881.19	1147.67
27	7	2hIR	190725	4	dCTD	exp1	2h	2	285.09	686.213	817.965
27	8	2hIR	190725	4	dCTD	exp1	2h	1	505.618	912.324	221.424
27	9	2hIR	190725	4	dCTD	exp1	2h	0	292.315	864.567	753.741
27	10	2hIR	190725	4	dCTD	exp1	2h	0	339.741	924.283	589.304
27	11	2hIR	190725	4	dCTD	exp1	2h	6	894.837	2450.28	1669.34
27	12	2hIR	190725	4	dCTD	exp1	2h	11	799.612	1031.55	2051.66
27	13	2hIR	190725	4	dCTD	exp1	2h	17	1199.19	2260.64	617.367
27	14	2hIR	190725	4	dCTD	exp1	2h	2	362.424	930.283	1441.11
27	15	2hIR	190725	4	dCTD	exp1	2h	6	645.01	1581.27	718.072
27	16	2hIR	190725	4	dCTD	exp1	2h	2	898.732	2646.6	600.844
27	17	2hIR	190725	4	dCTD	exp1	2h	15	821.724	1523.96	778.225
27	18	2hIR	190725	4	dCTD	exp1	2h	14	858.153	1755.74	631.228
27	19	2hIR	190725	4	dCTD	exp1	2h	0	220.824	939.598	99.3965
27	20	2hIR	190725	4	dCTD	exp1	2h	0	220.609	1027.46	74.2177
27	21	2hIR	190725	4	dCTD	exp1	2h	11	769.727	1977.48	2474.4
27	22	2hIR	190725	4	dCTD	exp1	2h	3	582.222	1722.94	1475.4
27	23	2hIR	190725	4	dCTD	exp1	2h	14	699.437	2050.79	808.364
27	24	2hIR	190725	4	dCTD	exp1	2h	6	388.667	1218.65	335.868
27	25	2hIR	190725	4	dCTD	exp1	2h	6	644.022	1545.18	751.881
27	26	2hIR	190725	4	dCTD	exp1	2h	27	1027.41	2755.32	1010.27
27	27	2hIR	190725	4	dCTD	exp1	2h	29	1251.56	2703.57	918.831
27	28	2hIR	190725	4	dCTD	exp1	2h	6	676.941	2910.99	826.558
27	29	2hIR	190725	4	dCTD	exp1	2h	27	851.972	2192.84	854.022
27	30	2hIR	190725	4	dCTD	exp1	2h	32	1666.84	3986	816.12
27	31	2hIR	190725	4	dCTD	exp1	2h	21	1167.26	1519.74	273.349
27	32	2hIR	190725	4	dCTD	exp1	2h	20	897.993	1424.13	781.286
27	33	2hIR	190725	4	dCTD	exp1	2h	2	827.325	2825.4	756.937
27	34	2hIR	190725	4	dCTD	exp1	2h	22	1347.81	3918.35	2204.7
27	35	2hIR	190725	4	dCTD	exp1	2h	0	280.624	1477.21	899.5
27	36	2hIR	190725	4	dCTD	exp1	2h	15	901.363	1732.48	1215.11
27	37	2hIR	190725	4	dCTD	exp1	2h	13	775.661	2778.04	1720.72
27	38	2hIR	190725	4	dCTD	exp1	2h	24	774.701	2267.83	926.401
27	39	2hIR	190725	4	dCTD	exp1	2h	18	1032.54	1683.23	1323.65
27	40	2hIR	190725	4	dCTD	exp1	2h	6	769.415	2115.19	225.613
27	41	2hIR	190725	4	dCTD	exp1	2h	26	1296.94	2766.53	593.139
27	42	2hIR	190725	4	dCTD	exp1	2h	1	750.888	1995.19	1254.28
27	43	2hIR	190725	4	dCTD	exp1	2h	1	726.817	2037.11	1107.9
27	44	2hIR	190725	4	dCTD	exp1	2h	14	579.941	1157.83	496.582
27	45	2hIR	190725	4	dCTD	exp1	2h	12	644.322	1507.66	1208.44
27	46	2hIR	190725	4	dCTD	exp1	2h	1	496.649	1215.36	823.176
27	47	2hIR	190725	4	dCTD	exp1	2h	18	736.577	1889.09	1261.65
27	48	2hIR	190725	4	dCTD	exp1	2h	8	301.772	779.55	569.055
27	49	2hIR	190725	4	dCTD	exp1	2h	12	679.783	2020.09	957.689
27	50	2hIR	190725	4	dCTD	exp1	2h	17	494.578	1055.15	812.474
27	51	2hIR	190725	4	dCTD	exp1	2h	1	579.048	1224.47	1077.26
28	1	noIR	190725	4	dCTD	exp1	noIR	3	1134.48	3233.87	3481.39
28	2	noIR	190725	4	dCTD	exp1	noIR	10	784.068	1287.39	2366.21
28	3	noIR	190725	4	dCTD	exp1	noIR	5	693.545	1680.16	2630.23
28	4	noIR	190725	4	dCTD	exp1	noIR	11	786.17	1352.47	2269.81
28	5	noIR	190725	4	dCTD	exp1	noIR	0	687.379	1293.4	1498.33
28	6	noIR	190725	4	dCTD	exp1	noIR	8	864.606	1669.49	2336.63
28	7	noIR	190725	4	dCTD	exp1	noIR	9	858.92	1700.58	2445
28	8	noIR	190725	4	dCTD	exp1	noIR	1	699.249	1095.11	1311.6
28	9	noIR	190725	4	dCTD	exp1	noIR	24	1541.6	2908.45	5026.92
28	10	noIR	190725	4	dCTD	exp1	noIR	8	720.565	1428.57	2494.19
28	11	noIR	190725	4	dCTD	exp1	noIR	15	819.875	1885.59	2534.44
28	12	noIR	190725	4	dCTD	exp1	noIR	12	745.418	1795.98	2061.97
28	13	noIR	190725	4	dCTD	exp1	noIR	8	741.606	1231.51	2200.07
28	14	noIR	190725	4	dCTD	exp1	noIR	5	660.364	1215.81	2238.1
28	15	noIR	190725	4	dCTD	exp1	noIR	0	145.808	339.506	38.8279
29	1	2hIR	190725	4	dDBD	exp1	2h	9	1110.68	1917.98	172.029
29	2	2hIR	190725	4	dDBD	exp1	2h	4	686.935	2171.56	219.08
29	3	2hIR	190725	4	dDBD	exp1	2h	13	780.644	2167.02	173.814
29	4	2hIR	190725	4	dDBD	exp1	2h	18	665.843	2053.06	957.054
29	5	2hIR	190725	4	dDBD	exp1	2h	5	365.638	1533.19	1066.86
29	6	2hIR	190725	4	dDBD	exp1	2h	14	639.855	1904.79	933.216
29	7	2hIR	190725	4	dDBD	exp1	2h	16	1007.91	2896.42	233.461
29	8	2hIR	190725	4	dDBD	exp1	2h	9	494.047	1950.52	361.974
29	9	2hIR	190725	4	dDBD	exp1	2h	12	542.335	1431.45	1690.81
29	10	2hIR	190725	4	dDBD	exp1	2h	9	955.305	2672.31	195.19
29	11	2hIR	190725	4	dDBD	exp1	2h	8	560.654	1794.59	1639.59
29	12	2hIR	190725	4	dDBD	exp1	2h	12	736.671	3096.92	1131.38
29	13	2hIR	190725	4	dDBD	exp1	2h	10	586.512	2213.13	2162.87
29	14	2hIR	190725	4	dDBD	exp1	2h	12	399.976	1267.94	1407.02
29	15	2hIR	190725	4	dDBD	exp1	2h	26	1110.4	2934.34	216.315
29	16	2hIR	190725	4	dDBD	exp1	2h	4	214.599	705.646	625.029
29	17	2hIR	190725	4	dDBD	exp1	2h	7	314.961	1106.21	890.815
29	18	2hIR	190725	4	dDBD	exp1	2h	4	431.272	2048.09	2010.87
29	19	2hIR	190725	4	dDBD	exp1	2h	24	1065.87	3396.68	280.246
29	20	2hIR	190725	4	dDBD	exp1	2h	5	887.9	3255.49	188.261
29	21	2hIR	190725	4	dDBD	exp1	2h	23	1185.96	3144.31	179.626
29	22	2hIR	190725	4	dDBD	exp1	2h	9	544.664	1864.51	1491.89
29	23	2hIR	190725	4	dDBD	exp1	2h	24	1248.35	3821.45	217.344
29	24	2hIR	190725	4	dDBD	exp1	2h	28	1042.21	3011.19	392.031
29	25	2hIR	190725	4	dDBD	exp1	2h	9	448.218	2558.27	699.811
29	26	2hIR	190725	4	dDBD	exp1	2h	1	975.99	3671.17	205.369
29	27	2hIR	190725	4	dDBD	exp1	2h	7	787.929	3430.89	725.18
29	28	2hIR	190725	4	dDBD	exp1	2h	10	571.248	1947.63	1890.2
29	29	2hIR	190725	4	dDBD	exp1	2h	1	360.997	1603.09	1032.35
29	30	2hIR	190725	4	dDBD	exp1	2h	14	602.017	1478.1	2064.43
29	31	2hIR	190725	4	dDBD	exp1	2h	12	808.735	2714.14	1673.34
29	32	2hIR	190725	4	dDBD	exp1	2h	1	942.625	3045.03	231.143
29	33	2hIR	190725	4	dDBD	exp1	2h	2	516.901	2224.7	1341.61
29	34	2hIR	190725	4	dDBD	exp1	2h	13	558.563	1926.41	2252.91
29	35	2hIR	190725	4	dDBD	exp1	2h	14	596.03	2492.77	2581.64
29	36	2hIR	190725	4	dDBD	exp1	2h	6	498.864	2632.86	1722.75
29	37	2hIR	190725	4	dDBD	exp1	2h	12	809.29	3545.56	171.009
29	38	2hIR	190725	4	dDBD	exp1	2h	9	499.646	2425.6	2701.78
29	39	2hIR	190725	4	dDBD	exp1	2h	1	501.736	2236.06	1051.53
29	40	2hIR	190725	4	dDBD	exp1	2h	3	457.288	2402.25	2280.14
29	41	2hIR	190725	4	dDBD	exp1	2h	13	834.256	2517.31	852.096
29	42	2hIR	190725	4	dDBD	exp1	2h	19	893.299	3471.89	209.33
29	43	2hIR	190725	4	dDBD	exp1	2h	22	616.886	2285.54	702.475
29	44	2hIR	190725	4	dDBD	exp1	2h	17	663.247	2286.61	1409.9
29	45	2hIR	190725	4	dDBD	exp1	2h	1	396.585	2277	2746.56
29	46	2hIR	190725	4	dDBD	exp1	2h	7	317.994	961.003	1056.29
29	47	2hIR	190725	4	dDBD	exp1	2h	26	678.648	2671.35	806.419
29	48	2hIR	190725	4	dDBD	exp1	2h	16	678.961	2425.27	2214.63
29	49	2hIR	190725	4	dDBD	exp1	2h	17	608.101	2651.41	2830.38
29	50	2hIR	190725	4	dDBD	exp1	2h	26	819.668	2990.5	740.049
29	51	2hIR	190725	4	dDBD	exp1	2h	8	410.707	1039.44	1316.71
29	52	2hIR	190725	4	dDBD	exp1	2h	20	856.895	3281.06	1673.84
29	53	2hIR	190725	4	dDBD	exp1	2h	9	599.015	1940.03	2249.45
29	54	2hIR	190725	4	dDBD	exp1	2h	21	783.684	2463.03	138.852
30	1	noIR	190725	4	dDBD	exp1	noIR	9	870.745	2298.79	194.344
30	2	noIR	190725	4	dDBD	exp1	noIR	3	1015.94	1988.04	204.013
30	3	noIR	190725	4	dDBD	exp1	noIR	2	631.437	898.973	2189.9
30	4	noIR	190725	4	dDBD	exp1	noIR	0	117.863	505.638	31.74
30	5	noIR	190725	4	dDBD	exp1	noIR	10	665.893	1510.37	1251.69
30	6	noIR	190725	4	dDBD	exp1	noIR	11	737.42	1808.72	4156.04
30	7	noIR	190725	4	dDBD	exp1	noIR	8	822.747	1693.87	3221.48
30	8	noIR	190725	4	dDBD	exp1	noIR	5	583.157	1009.01	1973.94
30	9	noIR	190725	4	dDBD	exp1	noIR	1	568.105	1399.63	144.596
30	10	noIR	190725	4	dDBD	exp1	noIR	0	285.006	981.166	68.7372
30	11	noIR	190725	4	dDBD	exp1	noIR	0	387.523	1469.35	76.9631
30	12	noIR	190725	4	dDBD	exp1	noIR	1	1074.53	1885.77	235.129
30	13	noIR	190725	4	dDBD	exp1	noIR	11	720.989	2015.64	4274.26
30	14	noIR	190725	4	dDBD	exp1	noIR	14	1077.4	3140.37	617.894
30	15	noIR	190725	4	dDBD	exp1	noIR	6	636.182	1972.2	1792.66
30	16	noIR	190725	4	dDBD	exp1	noIR	0	502.325	806.702	1355.72
30	17	noIR	190725	4	dDBD	exp1	noIR	0	319.283	1119.8	66.4835
30	18	noIR	190725	4	dDBD	exp1	noIR	13	955.968	2210.89	3207.05
30	19	noIR	190725	4	dDBD	exp1	noIR	4	1034.78	3075.4	237.532
30	20	noIR	190725	4	dDBD	exp1	noIR	7	694.744	1746.68	2432.46
30	21	noIR	190725	4	dDBD	exp1	noIR	17	798.988	2371.02	2065.63
30	22	noIR	190725	4	dDBD	exp1	noIR	8	500.485	1163.98	2796.96
30	23	noIR	190725	4	dDBD	exp1	noIR	0	326.037	1320.46	80.9008
30	24	noIR	190725	4	dDBD	exp1	noIR	0	407.537	1360.46	96.336
30	25	noIR	190725	4	dDBD	exp1	noIR	9	767.141	2447.46	1893.86
30	26	noIR	190725	4	dDBD	exp1	noIR	7	487.679	1546.49	3148.42
30	27	noIR	190725	4	dDBD	exp1	noIR	6	542.293	1234.76	2070.42
30	28	noIR	190725	4	dDBD	exp1	noIR	13	665.894	2026.77	1571.71
30	29	noIR	190725	4	dDBD	exp1	noIR	14	947.616	2997.52	2192.38
30	30	noIR	190725	4	dDBD	exp1	noIR	0	356.829	1228.77	91.5048
30	31	noIR	190725	4	dDBD	exp1	noIR	1	871.155	2325.9	216.846
30	32	noIR	190725	4	dDBD	exp1	noIR	8	972.1	3100.32	302.63
30	33	noIR	190725	4	dDBD	exp1	noIR	14	1066.69	2741.48	513.939
30	34	noIR	190725	4	dDBD	exp1	noIR	9	594.816	1266.08	727.021
30	35	noIR	190725	4	dDBD	exp1	noIR	8	933.67	2283.46	749.948
30	36	noIR	190725	4	dDBD	exp1	noIR	11	762.684	2285.71	2619.91
30	37	noIR	190725	4	dDBD	exp1	noIR	7	527.622	1221.72	866.442
30	38	noIR	190725	4	dDBD	exp1	noIR	9	1001.59	2477.36	225.559
30	39	noIR	190725	4	dDBD	exp1	noIR	13	998.004	2586.74	1197.24
30	40	noIR	190725	4	dDBD	exp1	noIR	23	962.019	2465.84	2881.4
31	1	2hIR	190725	4	dDBDdCTD	exp1	2h	3	482.635	778.802	807.302
31	2	2hIR	190725	4	dDBDdCTD	exp1	2h	3	239.588	538.386	412.622
31	3	2hIR	190725	4	dDBDdCTD	exp1	2h	9	907.369	2110.55	185.438
31	4	2hIR	190725	4	dDBDdCTD	exp1	2h	5	1244.48	2074.03	252.066
31	5	2hIR	190725	4	dDBDdCTD	exp1	2h	30	979.131	1925.5	795.556
31	6	2hIR	190725	4	dDBDdCTD	exp1	2h	8	441.1	1174.84	128.44
31	7	2hIR	190725	4	dDBDdCTD	exp1	2h	11	485.882	1496.46	277.674
31	8	2hIR	190725	4	dDBDdCTD	exp1	2h	8	657.97	1767.48	362.663
31	9	2hIR	190725	4	dDBDdCTD	exp1	2h	8	472.794	1395.96	187.164
31	10	2hIR	190725	4	dDBDdCTD	exp1	2h	7	446.074	1173.12	148.658
31	11	2hIR	190725	4	dDBDdCTD	exp1	2h	2	903.83	2163.19	216.884
31	12	2hIR	190725	4	dDBDdCTD	exp1	2h	14	877.441	2520.66	1441.49
31	13	2hIR	190725	4	dDBDdCTD	exp1	2h	5	567.878	1430.85	1495.29
31	14	2hIR	190725	4	dDBDdCTD	exp1	2h	15	842.706	2906.1	1068.51
31	15	2hIR	190725	4	dDBDdCTD	exp1	2h	6	577.396	2288.09	1696.92
31	16	2hIR	190725	4	dDBDdCTD	exp1	2h	4	491.063	1524.69	1571.79
31	17	2hIR	190725	4	dDBDdCTD	exp1	2h	11	701.427	1476.29	1303.93
31	18	2hIR	190725	4	dDBDdCTD	exp1	2h	1	454.917	1522.09	912.259
31	19	2hIR	190725	4	dDBDdCTD	exp1	2h	11	826.176	1886.22	1959.05
31	20	2hIR	190725	4	dDBDdCTD	exp1	2h	11	695.203	1318.31	1126.43
31	21	2hIR	190725	4	dDBDdCTD	exp1	2h	12	710.58	1732.53	2396.41
31	22	2hIR	190725	4	dDBDdCTD	exp1	2h	0	109.898	252.397	103.125
31	23	2hIR	190725	4	dDBDdCTD	exp1	2h	6	900.203	3088.82	1656.02
31	24	2hIR	190725	4	dDBDdCTD	exp1	2h	17	547.776	2218.93	670.969
31	25	2hIR	190725	4	dDBDdCTD	exp1	2h	0	1031.85	2728.58	217.481
31	26	2hIR	190725	4	dDBDdCTD	exp1	2h	11	555.855	1337.68	2039.69
31	27	2hIR	190725	4	dDBDdCTD	exp1	2h	23	792.845	2419.18	622.671
31	28	2hIR	190725	4	dDBDdCTD	exp1	2h	7	1335.07	2905.61	248.51
31	29	2hIR	190725	4	dDBDdCTD	exp1	2h	21	670.032	2500.47	583.856
31	30	2hIR	190725	4	dDBDdCTD	exp1	2h	0	1044.67	2860.46	234.96
31	31	2hIR	190725	4	dDBDdCTD	exp1	2h	14	769.335	2857.09	670.449
31	32	2hIR	190725	4	dDBDdCTD	exp1	2h	4	1117.47	2643.05	237.911
31	33	2hIR	190725	4	dDBDdCTD	exp1	2h	4	363.241	938.716	855.426
31	34	2hIR	190725	4	dDBDdCTD	exp1	2h	0	887.128	3026.1	221.688
31	35	2hIR	190725	4	dDBDdCTD	exp1	2h	5	390.351	1219.52	1023.22
31	36	2hIR	190725	4	dDBDdCTD	exp1	2h	4	315.519	1480.51	341.149
31	37	2hIR	190725	4	dDBDdCTD	exp1	2h	30	1133.81	3790.23	733.252
31	38	2hIR	190725	4	dDBDdCTD	exp1	2h	14	1537.26	3537.99	282.851
31	39	2hIR	190725	4	dDBDdCTD	exp1	2h	19	1071.46	2751.83	517.165
31	40	2hIR	190725	4	dDBDdCTD	exp1	2h	9	1059.89	3145.55	221.435
31	41	2hIR	190725	4	dDBDdCTD	exp1	2h	11	584.703	2353.68	1305.54
31	42	2hIR	190725	4	dDBDdCTD	exp1	2h	7	481.196	2139.06	1349.23
32	1	noIR	190725	4	dDBDdCTD	exp1	noIR	15	831.631	1621.03	2302.95
32	2	noIR	190725	4	dDBDdCTD	exp1	noIR	3	558.143	1660.64	186.6
32	3	noIR	190725	4	dDBDdCTD	exp1	noIR	10	866.433	1689.83	2342.7
32	4	noIR	190725	4	dDBDdCTD	exp1	noIR	8	722.156	1201.05	2472.16
32	5	noIR	190725	4	dDBDdCTD	exp1	noIR	13	624.771	1627.86	3231.29
32	6	noIR	190725	4	dDBDdCTD	exp1	noIR	0	109.392	663.65	42.8681
32	7	noIR	190725	4	dDBDdCTD	exp1	noIR	18	767.204	1774.17	2327.55
32	8	noIR	190725	4	dDBDdCTD	exp1	noIR	19	635.443	1579.78	2245.11
32	9	noIR	190725	4	dDBDdCTD	exp1	noIR	10	1854.62	4529.24	359.673
32	10	noIR	190725	4	dDBDdCTD	exp1	noIR	2	616.952	1914.3	168.431
32	11	noIR	190725	4	dDBDdCTD	exp1	noIR	7	635.644	1693.24	159.697
32	12	noIR	190725	4	dDBDdCTD	exp1	noIR	11	516.441	1486.62	1518.73
32	13	noIR	190725	4	dDBDdCTD	exp1	noIR	7	511.458	1593.48	2916.74
32	14	noIR	190725	4	dDBDdCTD	exp1	noIR	1	707.518	1724.93	165.666
32	15	noIR	190725	4	dDBDdCTD	exp1	noIR	5	576.283	1214.54	1841.41
32	16	noIR	190725	4	dDBDdCTD	exp1	noIR	2	635.515	2037.58	168.321
32	17	noIR	190725	4	dDBDdCTD	exp1	noIR	0	949.373	1766.3	188.018
32	18	noIR	190725	4	dDBDdCTD	exp1	noIR	6	536.496	1068.78	2342.1
32	19	noIR	190725	4	dDBDdCTD	exp1	noIR	14	645.179	2509.21	1924.44
32	20	noIR	190725	4	dDBDdCTD	exp1	noIR	1	599.467	1270.96	132.574
32	21	noIR	190725	4	dDBDdCTD	exp1	noIR	1	531.377	1129.47	1682.02
32	22	noIR	190725	4	dDBDdCTD	exp1	noIR	7	652.128	1131.47	3264.78
32	23	noIR	190725	4	dDBDdCTD	exp1	noIR	30	1203.62	3204.17	3260.64
32	24	noIR	190725	4	dDBDdCTD	exp1	noIR	5	412.127	852.313	1605.98
32	25	noIR	190725	4	dDBDdCTD	exp1	noIR	5	296.365	817.603	1048.45
32	26	noIR	190725	4	dDBDdCTD	exp1	noIR	29	921.872	2164.05	2806.79
32	27	noIR	190725	4	dDBDdCTD	exp1	noIR	4	767.262	1875.93	1016.33
32	28	noIR	190725	4	dDBDdCTD	exp1	noIR	21	1225.64	3081.8	3792.89
32	29	noIR	190725	4	dDBDdCTD	exp1	noIR	14	319.769	574.846	954.299
32	30	noIR	190725	4	dDBDdCTD	exp1	noIR	8	534.389	1208.95	2899.83
32	31	noIR	190725	4	dDBDdCTD	exp1	noIR	4	368.229	1553.55	1407.42
32	32	noIR	190725	4	dDBDdCTD	exp1	noIR	17	691.426	2292.37	4095.22
32	33	noIR	190725	4	dDBDdCTD	exp1	noIR	1	421.449	778.327	105.382
32	34	noIR	190725	4	dDBDdCTD	exp1	noIR	11	365.673	735.332	1221.77
32	35	noIR	190725	4	dDBDdCTD	exp1	noIR	7	839.418	2375.79	187.45
32	36	noIR	190725	4	dDBDdCTD	exp1	noIR	6	717.758	1979.18	3933.94
32	37	noIR	190725	4	dDBDdCTD	exp1	noIR	1	859.362	2436.85	202.206
32	38	noIR	190725	4	dDBDdCTD	exp1	noIR	16	1365.01	3660.96	1211.3
32	39	noIR	190725	4	dDBDdCTD	exp1	noIR	0	574.152	913.076	585.549
32	40	noIR	190725	4	dDBDdCTD	exp1	noIR	1	425.63	737.505	100.888
32	41	noIR	190725	4	dDBDdCTD	exp1	noIR	8	593.13	1303.37	3110.84
33	1	2hIR	190725	5	WT	exp1	2h	13	731.98	2099.59	1523.83
33	2	2hIR	190725	5	WT	exp1	2h	13	879.388	1641.06	1112.93
33	3	2hIR	190725	5	WT	exp1	2h	11	1020.38	2703.49	857.733
33	4	2hIR	190725	5	WT	exp1	2h	0	146.673	394.825	95.4753
33	5	2hIR	190725	5	WT	exp1	2h	0	519.741	1527.7	548.135
33	6	2hIR	190725	5	WT	exp1	2h	30	981.448	2485.82	2061.63
33	7	2hIR	190725	5	WT	exp1	2h	0	689.326	2520.16	214.371
33	8	2hIR	190725	5	WT	exp1	2h	1	615.32	2323.12	127.958
33	9	2hIR	190725	5	WT	exp1	2h	24	1181.66	3123.93	827.802
33	10	2hIR	190725	5	WT	exp1	2h	27	1122.39	2913.73	1447.14
33	11	2hIR	190725	5	WT	exp1	2h	1	541.574	1681.18	1176.49
33	12	2hIR	190725	5	WT	exp1	2h	1	651.567	2042.99	1597.13
33	13	2hIR	190725	5	WT	exp1	2h	40	1326.55	3407.46	485.347
33	14	2hIR	190725	5	WT	exp1	2h	9	742.906	2341.06	2475.46
33	15	2hIR	190725	5	WT	exp1	2h	16	754.99	2823.81	1279.1
33	16	2hIR	190725	5	WT	exp1	2h	17	771.607	2626.45	2930.29
33	17	2hIR	190725	5	WT	exp1	2h	13	719.975	2065.82	2004.26
33	18	2hIR	190725	5	WT	exp1	2h	21	914.929	3101.18	869.105
33	19	2hIR	190725	5	WT	exp1	2h	12	525.311	1112.04	1062.09
33	20	2hIR	190725	5	WT	exp1	2h	30	828.793	2205.95	1852.45
33	21	2hIR	190725	5	WT	exp1	2h	10	566.901	1243.13	1151.75
33	22	2hIR	190725	5	WT	exp1	2h	7	778.648	2104.2	1515.18
33	23	2hIR	190725	5	WT	exp1	2h	30	1470.22	4117.48	3642.66
33	24	2hIR	190725	5	WT	exp1	2h	21	922.655	2395.66	2149.27
33	25	2hIR	190725	5	WT	exp1	2h	0	782.498	4351.44	237.505
33	26	2hIR	190725	5	WT	exp1	2h	18	566.152	1529.69	643.97
33	27	2hIR	190725	5	WT	exp1	2h	1	497.976	2644.08	149.41
33	28	2hIR	190725	5	WT	exp1	2h	39	1246.96	4060.23	404.112
33	29	2hIR	190725	5	WT	exp1	2h	7	633.571	1517.46	1100.03
33	30	2hIR	190725	5	WT	exp1	2h	24	957.854	4306.03	410.391
33	31	2hIR	190725	5	WT	exp1	2h	23	1089.8	2661.27	857.97
33	32	2hIR	190725	5	WT	exp1	2h	15	654.086	2195.43	1943.35
33	33	2hIR	190725	5	WT	exp1	2h	16	808.684	3406.15	1355.21
33	34	2hIR	190725	5	WT	exp1	2h	0	770.511	2145.04	139.176
33	35	2hIR	190725	5	WT	exp1	2h	1	395.117	1531.1	1377.75
33	36	2hIR	190725	5	WT	exp1	2h	3	239.353	452.752	257.062
33	37	2hIR	190725	5	WT	exp1	2h	29	900.893	2924.78	271.329
33	38	2hIR	190725	5	WT	exp1	2h	7	334.637	1661.28	87.7585
33	39	2hIR	190725	5	WT	exp1	2h	12	527.069	1360.27	1261.12
33	40	2hIR	190725	5	WT	exp1	2h	27	977.097	2478	1032.17
33	41	2hIR	190725	5	WT	exp1	2h	7	595.791	1837.25	1639.16
33	42	2hIR	190725	5	WT	exp1	2h	24	908.392	2070.89	134.356
33	43	2hIR	190725	5	WT	exp1	2h	1	429.666	1122.44	815.838
33	44	2hIR	190725	5	WT	exp1	2h	13	548.135	1819.39	448.869
33	45	2hIR	190725	5	WT	exp1	2h	3	228.443	539.638	286.03
34	1	noIR	190725	5	WT	exp1	noIR	7	2713.89	1819.26	2901.08
34	2	noIR	190725	5	WT	exp1	noIR	7	3151.65	1931.47	1688.97
34	3	noIR	190725	5	WT	exp1	noIR	2	2251.96	1372.22	1977.89
34	4	noIR	190725	5	WT	exp1	noIR	2	1277.79	780.955	1162.59
34	5	noIR	190725	5	WT	exp1	noIR	10	2499.84	2177.06	2832.38
34	6	noIR	190725	5	WT	exp1	noIR	1	768.387	411.324	602.417
34	7	noIR	190725	5	WT	exp1	noIR	1	938.018	1112.91	1232.05
34	8	noIR	190725	5	WT	exp1	noIR	0	1208.1	1204.74	1331.78
34	9	noIR	190725	5	WT	exp1	noIR	20	6816.29	2860.64	347.061
34	10	noIR	190725	5	WT	exp1	noIR	41	5675.71	3360.45	353.465
34	11	noIR	190725	5	WT	exp1	noIR	5	2102.55	1494.87	140.029
34	12	noIR	190725	5	WT	exp1	noIR	0	1322.51	1589.75	116.385
34	13	noIR	190725	5	WT	exp1	noIR	1	1388.67	1402.39	106.117
34	14	noIR	190725	5	WT	exp1	noIR	0	3296.06	3977.04	281.593
34	15	noIR	190725	5	WT	exp1	noIR	0	681.911	1070.46	53.1861
34	16	noIR	190725	5	WT	exp1	noIR	0	416.726	677.298	36.3548
34	17	noIR	190725	5	WT	exp1	noIR	5	3314.84	3746.91	582.002
34	18	noIR	190725	5	WT	exp1	noIR	12	4977.25	3525.75	377.466
34	19	noIR	190725	5	WT	exp1	noIR	0	1451.29	1566.72	1203.57
34	20	noIR	190725	5	WT	exp1	noIR	1	2271.4	1765.88	164.039
34	21	noIR	190725	5	WT	exp1	noIR	0	1281.73	1328.07	103.586
34	22	noIR	190725	5	WT	exp1	noIR	0	1237.68	1443.19	995.365
34	23	noIR	190725	5	WT	exp1	noIR	11	2633.83	1682.96	159.52
34	24	noIR	190725	5	WT	exp1	noIR	2	1578.33	1265.4	96.5561
34	25	noIR	190725	5	WT	exp1	noIR	2	3179.63	3087.45	263.981
35	1	2hIR	190725	5	dCTD	exp1	2h	0	245.805	683.07	345.509
35	2	2hIR	190725	5	dCTD	exp1	2h	13	1004.43	2320.79	1083.83
35	3	2hIR	190725	5	dCTD	exp1	2h	4	643.346	1772.95	434.624
35	4	2hIR	190725	5	dCTD	exp1	2h	20	723.414	1439.54	1553.65
35	5	2hIR	190725	5	dCTD	exp1	2h	22	1121.17	2295.88	2420.38
35	6	2hIR	190725	5	dCTD	exp1	2h	14	858.025	1466.27	1443.21
35	7	2hIR	190725	5	dCTD	exp1	2h	36	1014.19	1907.95	1687.69
35	8	2hIR	190725	5	dCTD	exp1	2h	8	332.598	761.359	678.606
35	9	2hIR	190725	5	dCTD	exp1	2h	26	1174.67	2865.31	2631.31
35	10	2hIR	190725	5	dCTD	exp1	2h	19	646.327	1550.62	2000.36
35	11	2hIR	190725	5	dCTD	exp1	2h	4	771.683	1759.23	1862.61
35	12	2hIR	190725	5	dCTD	exp1	2h	13	768.845	1518.71	2595.92
35	13	2hIR	190725	5	dCTD	exp1	2h	1	413.995	1648.94	1362.35
35	14	2hIR	190725	5	dCTD	exp1	2h	3	691.575	1582.58	1422.34
35	15	2hIR	190725	5	dCTD	exp1	2h	4	540.531	1840.03	1357.74
35	16	2hIR	190725	5	dCTD	exp1	2h	13	787.798	2350.5	1716.85
35	17	2hIR	190725	5	dCTD	exp1	2h	19	909.454	2955.45	1598.84
35	18	2hIR	190725	5	dCTD	exp1	2h	47	1624.89	4612.14	3705.81
35	19	2hIR	190725	5	dCTD	exp1	2h	8	866.855	3086.87	1282.66
35	20	2hIR	190725	5	dCTD	exp1	2h	0	295.753	992.15	83.2593
35	21	2hIR	190725	5	dCTD	exp1	2h	16	950.306	3485.17	2395.67
35	22	2hIR	190725	5	dCTD	exp1	2h	8	670.078	2197.75	2239.93
35	23	2hIR	190725	5	dCTD	exp1	2h	16	828.257	2558.28	1725.04
35	24	2hIR	190725	5	dCTD	exp1	2h	27	789.552	2232.16	2016.78
35	25	2hIR	190725	5	dCTD	exp1	2h	14	549.723	1624.45	1256.41
35	26	2hIR	190725	5	dCTD	exp1	2h	22	917.481	2837.45	1985.52
35	27	2hIR	190725	5	dCTD	exp1	2h	9	447.015	1354.2	1392.31
35	28	2hIR	190725	5	dCTD	exp1	2h	11	398.953	1070.03	810.018
35	29	2hIR	190725	5	dCTD	exp1	2h	21	803.703	2096.46	1678.18
35	30	2hIR	190725	5	dCTD	exp1	2h	20	744.086	1790.14	1841.73
35	31	2hIR	190725	5	dCTD	exp1	2h	25	869.97	2624.52	2094.19
35	32	2hIR	190725	5	dCTD	exp1	2h	19	993.762	3690.63	1633.66
35	33	2hIR	190725	5	dCTD	exp1	2h	28	1241.57	3791.71	1166.83
35	34	2hIR	190725	5	dCTD	exp1	2h	18	848.834	2815.3	2937.22
35	35	2hIR	190725	5	dCTD	exp1	2h	8	630.812	1831.86	1991.33
36	1	noIR	190725	5	dCTD	exp1	noIR	9	498.852	1157.5	1013.83
36	2	noIR	190725	5	dCTD	exp1	noIR	0	537.073	589.092	745.652
36	3	noIR	190725	5	dCTD	exp1	noIR	11	704.921	893.375	1668.07
36	4	noIR	190725	5	dCTD	exp1	noIR	0	492.759	1590.55	1650.96
36	5	noIR	190725	5	dCTD	exp1	noIR	1	651.391	1090.71	161.027
36	6	noIR	190725	5	dCTD	exp1	noIR	13	457.696	917.16	1343.24
36	7	noIR	190725	5	dCTD	exp1	noIR	1	443.204	796.132	1086.19
36	8	noIR	190725	5	dCTD	exp1	noIR	5	549.041	800.996	901.519
36	9	noIR	190725	5	dCTD	exp1	noIR	13	832.558	1808.55	2887.51
36	10	noIR	190725	5	dCTD	exp1	noIR	2	524.878	1034.71	1666
36	11	noIR	190725	5	dCTD	exp1	noIR	11	675.481	1013.88	1394.88
36	12	noIR	190725	5	dCTD	exp1	noIR	6	412.681	816.007	1037.58
36	13	noIR	190725	5	dCTD	exp1	noIR	6	304.429	485.31	544.803
36	14	noIR	190725	5	dCTD	exp1	noIR	9	652.158	1552.74	1042.66
36	15	noIR	190725	5	dCTD	exp1	noIR	2	679.727	1502.18	2397.59
36	16	noIR	190725	5	dCTD	exp1	noIR	5	290.991	699.677	535.584
36	17	noIR	190725	5	dCTD	exp1	noIR	7	849.725	1483.9	366.432
36	18	noIR	190725	5	dCTD	exp1	noIR	4	618.596	1340.94	2182.54
36	19	noIR	190725	5	dCTD	exp1	noIR	6	485.392	1054.06	1966.89
36	20	noIR	190725	5	dCTD	exp1	noIR	2	607.559	1044.43	2431.33
36	21	noIR	190725	5	dCTD	exp1	noIR	4	418.309	1112.92	1486.75
36	22	noIR	190725	5	dCTD	exp1	noIR	9	642.012	1590.83	2042.45
36	23	noIR	190725	5	dCTD	exp1	noIR	2	462.799	1070.51	2510.23
36	24	noIR	190725	5	dCTD	exp1	noIR	0	410.923	900.458	625.564
36	25	noIR	190725	5	dCTD	exp1	noIR	16	1094.9	1780.18	2408.98
36	26	noIR	190725	5	dCTD	exp1	noIR	11	519.818	1372.76	1775.25
36	27	noIR	190725	5	dCTD	exp1	noIR	6	908.042	1812.82	1966.22
36	28	noIR	190725	5	dCTD	exp1	noIR	0	536.877	1014.73	695.438
36	29	noIR	190725	5	dCTD	exp1	noIR	12	670.876	2009.74	2558.23
36	30	noIR	190725	5	dCTD	exp1	noIR	16	821.9	1889.73	2540.38
36	31	noIR	190725	5	dCTD	exp1	noIR	16	900.077	1491.02	2525.98
36	32	noIR	190725	5	dCTD	exp1	noIR	9	740.78	1246.63	2909.4
36	33	noIR	190725	5	dCTD	exp1	noIR	13	904.732	1130.02	2206.09
36	34	noIR	190725	5	dCTD	exp1	noIR	11	533.694	1585.02	1645.44
36	35	noIR	190725	5	dCTD	exp1	noIR	4	471.343	1252.27	2814.67
36	36	noIR	190725	5	dCTD	exp1	noIR	11	620.802	1190.76	1494.06
36	37	noIR	190725	5	dCTD	exp1	noIR	14	1235.46	1900.14	2688.27
36	38	noIR	190725	5	dCTD	exp1	noIR	4	323.173	780.251	98.9662
36	39	noIR	190725	5	dCTD	exp1	noIR	3	674.198	2309.12	213.495
36	40	noIR	190725	5	dCTD	exp1	noIR	15	848.515	1848.52	3018.43
36	41	noIR	190725	5	dCTD	exp1	noIR	8	758.96	1702.23	3726.82
36	42	noIR	190725	5	dCTD	exp1	noIR	5	772.627	2114.26	1504.05
37	1	2hIR	190725	5	dDBD	exp1	2h	0	507.198	1330.81	952.067
37	2	2hIR	190725	5	dDBD	exp1	2h	19	1290.41	2362.79	244.951
37	3	2hIR	190725	5	dDBD	exp1	2h	16	809.868	2198.78	2645.17
37	4	2hIR	190725	5	dDBD	exp1	2h	13	842.303	2537.65	3279.49
37	5	2hIR	190725	5	dDBD	exp1	2h	12	1126.08	2487.1	237.875
37	6	2hIR	190725	5	dDBD	exp1	2h	1	511.059	1381.93	98.3827
37	7	2hIR	190725	5	dDBD	exp1	2h	10	716.68	2477.75	3554.48
37	8	2hIR	190725	5	dDBD	exp1	2h	3	533.114	1539.51	1577.76
37	9	2hIR	190725	5	dDBD	exp1	2h	3	498.791	1426.42	92.9513
37	10	2hIR	190725	5	dDBD	exp1	2h	0	494.204	1385.18	1243.7
37	11	2hIR	190725	5	dDBD	exp1	2h	10	577.919	1470.15	1975.62
37	12	2hIR	190725	5	dDBD	exp1	2h	8	579.221	1851.74	1896.96
37	13	2hIR	190725	5	dDBD	exp1	2h	1	591.585	1488.91	1508.85
37	14	2hIR	190725	5	dDBD	exp1	2h	20	729.477	2560.37	2461.81
37	15	2hIR	190725	5	dDBD	exp1	2h	0	778.64	2792.55	195.308
37	16	2hIR	190725	5	dDBD	exp1	2h	1	886.89	3094.01	222.163
37	17	2hIR	190725	5	dDBD	exp1	2h	0	337.85	1438.46	889.289
37	18	2hIR	190725	5	dDBD	exp1	2h	8	472.364	1250.32	1600.26
37	19	2hIR	190725	5	dDBD	exp1	2h	6	671.643	1393.75	958.149
37	20	2hIR	190725	5	dDBD	exp1	2h	5	529.53	1770.14	1842.85
37	21	2hIR	190725	5	dDBD	exp1	2h	8	508.763	1789.1	2086.43
37	22	2hIR	190725	5	dDBD	exp1	2h	9	508.473	2095.63	2583.58
37	23	2hIR	190725	5	dDBD	exp1	2h	1	262.235	1079.33	563.338
37	24	2hIR	190725	5	dDBD	exp1	2h	7	1200.09	3071.24	197.052
37	25	2hIR	190725	5	dDBD	exp1	2h	2	306.608	1137.71	1271.25
37	26	2hIR	190725	5	dDBD	exp1	2h	24	1126.35	3054.73	191.983
37	27	2hIR	190725	5	dDBD	exp1	2h	1	330.976	1377.04	1206.24
37	28	2hIR	190725	5	dDBD	exp1	2h	2	315.622	1279.08	505.984
37	29	2hIR	190725	5	dDBD	exp1	2h	20	688.853	3302.69	144.49
37	30	2hIR	190725	5	dDBD	exp1	2h	6	438.744	1827.6	1816.99
37	31	2hIR	190725	5	dDBD	exp1	2h	10	679.048	1570.59	2310.65
37	32	2hIR	190725	5	dDBD	exp1	2h	2	199.094	813.923	384.23
37	33	2hIR	190725	5	dDBD	exp1	2h	12	575.329	1976.51	1235.99
37	34	2hIR	190725	5	dDBD	exp1	2h	5	442.014	1655.77	2122.9
37	35	2hIR	190725	5	dDBD	exp1	2h	3	467.544	1724.62	985.559
37	36	2hIR	190725	5	dDBD	exp1	2h	4	272.207	1319.65	636.985
37	37	2hIR	190725	5	dDBD	exp1	2h	1	293.539	1058.9	80.8029
37	38	2hIR	190725	5	dDBD	exp1	2h	21	653.113	1828.23	572.818
37	39	2hIR	190725	5	dDBD	exp1	2h	18	665.095	2400.74	136.52
37	40	2hIR	190725	5	dDBD	exp1	2h	17	657.41	1914.64	1457.68
38	1	noIR	190725	5	dDBD	exp1	noIR	0	294.797	1171.36	99.2442
38	2	noIR	190725	5	dDBD	exp1	noIR	4	617.225	1645.09	3467.04
38	3	noIR	190725	5	dDBD	exp1	noIR	8	785.236	1585.01	2884.41
38	4	noIR	190725	5	dDBD	exp1	noIR	1	793.58	1595.23	1406.12
38	5	noIR	190725	5	dDBD	exp1	noIR	7	661.944	2058.82	1745.64
38	6	noIR	190725	5	dDBD	exp1	noIR	11	720.267	1579.23	3189.83
38	7	noIR	190725	5	dDBD	exp1	noIR	3	534.301	1341.77	3380.77
38	8	noIR	190725	5	dDBD	exp1	noIR	0	572.231	1632.64	3085.85
38	9	noIR	190725	5	dDBD	exp1	noIR	2	644.881	2169.62	2071.78
38	10	noIR	190725	5	dDBD	exp1	noIR	4	804.514	2070.28	4565.9
38	11	noIR	190725	5	dDBD	exp1	noIR	4	671.975	1803.37	3590.04
38	12	noIR	190725	5	dDBD	exp1	noIR	3	546.947	1427.81	3011.42
38	13	noIR	190725	5	dDBD	exp1	noIR	2	921.19	2714.03	250.904
38	14	noIR	190725	5	dDBD	exp1	noIR	9	407.711	907.829	1484.84
38	15	noIR	190725	5	dDBD	exp1	noIR	1	451.353	1426.49	83.4296
38	16	noIR	190725	5	dDBD	exp1	noIR	5	608.068	1523.23	2271.03
38	17	noIR	190725	5	dDBD	exp1	noIR	0	97.7177	477.24	34.7341
38	18	noIR	190725	5	dDBD	exp1	noIR	7	336.776	795.187	1074.19
38	19	noIR	190725	5	dDBD	exp1	noIR	0	144.063	800.947	52.0213
38	20	noIR	190725	5	dDBD	exp1	noIR	5	575.094	1450.29	2219.65
38	21	noIR	190725	5	dDBD	exp1	noIR	11	475.907	1014.06	1413.06
38	22	noIR	190725	5	dDBD	exp1	noIR	12	1181.28	4056.89	3547.52
38	23	noIR	190725	5	dDBD	exp1	noIR	5	870.383	2578.32	3547.53
38	24	noIR	190725	5	dDBD	exp1	noIR	0	342.455	1277.08	111.31
38	25	noIR	190725	5	dDBD	exp1	noIR	2	874.209	2130.57	227.575
38	26	noIR	190725	5	dDBD	exp1	noIR	1	649.45	2036.78	2650.26
38	27	noIR	190725	5	dDBD	exp1	noIR	0	233.993	746.098	65.0299
38	28	noIR	190725	5	dDBD	exp1	noIR	7	851.701	2282.61	3065.61
38	29	noIR	190725	5	dDBD	exp1	noIR	0	208.28	653.999	54.041
38	30	noIR	190725	5	dDBD	exp1	noIR	7	673.261	1988.51	3847.62
38	31	noIR	190725	5	dDBD	exp1	noIR	7	598.453	1503.6	2819.81
38	32	noIR	190725	5	dDBD	exp1	noIR	0	1055.09	1935.71	211.217
38	33	noIR	190725	5	dDBD	exp1	noIR	10	696.441	1828.39	4155.12
38	34	noIR	190725	5	dDBD	exp1	noIR	7	639.71	1965.33	3439.28
38	35	noIR	190725	5	dDBD	exp1	noIR	1	516.971	1153.68	2249
38	36	noIR	190725	5	dDBD	exp1	noIR	1	976.426	2720.47	231.236
38	37	noIR	190725	5	dDBD	exp1	noIR	0	578.054	1936.48	2463.01
38	38	noIR	190725	5	dDBD	exp1	noIR	4	748.406	1894.1	3827.97
38	39	noIR	190725	5	dDBD	exp1	noIR	2	464.756	1493.44	1708.4
38	40	noIR	190725	5	dDBD	exp1	noIR	1	574.861	1771.13	3738.34
38	41	noIR	190725	5	dDBD	exp1	noIR	1	964.785	2104.35	238.635
38	42	noIR	190725	5	dDBD	exp1	noIR	14	970.473	1762.42	3614.78
38	43	noIR	190725	5	dDBD	exp1	noIR	6	695.035	1521.4	3823.09
38	44	noIR	190725	5	dDBD	exp1	noIR	8	708.737	1552.34	4148.21
39	1	2hIR	190725	5	dDBDdCTD	exp1	2h	26	958.97	1949.17	186.593
39	2	2hIR	190725	5	dDBDdCTD	exp1	2h	4	1165.82	1834.7	188.624
39	3	2hIR	190725	5	dDBDdCTD	exp1	2h	0	639.329	1228.59	141.252
39	4	2hIR	190725	5	dDBDdCTD	exp1	2h	8	1128.31	2515.73	236.34
39	5	2hIR	190725	5	dDBDdCTD	exp1	2h	0	779.22	2053.79	227.129
39	6	2hIR	190725	5	dDBDdCTD	exp1	2h	4	312.518	878.345	741.254
39	7	2hIR	190725	5	dDBDdCTD	exp1	2h	10	474.731	1365.22	630.121
39	8	2hIR	190725	5	dDBDdCTD	exp1	2h	8	798.941	2376.61	164.604
39	9	2hIR	190725	5	dDBDdCTD	exp1	2h	2	353.008	1466.54	1034.2
39	10	2hIR	190725	5	dDBDdCTD	exp1	2h	9	599.147	1309.71	171.049
39	11	2hIR	190725	5	dDBDdCTD	exp1	2h	3	378.143	1287.86	844.748
39	12	2hIR	190725	5	dDBDdCTD	exp1	2h	12	687.014	1808.18	1338.94
39	13	2hIR	190725	5	dDBDdCTD	exp1	2h	2	354.223	1197.99	787.379
39	14	2hIR	190725	5	dDBDdCTD	exp1	2h	15	728.616	1603.45	583.702
39	15	2hIR	190725	5	dDBDdCTD	exp1	2h	0	779.755	2100.89	160.322
39	16	2hIR	190725	5	dDBDdCTD	exp1	2h	1	123.47	284.437	36.3733
39	17	2hIR	190725	5	dDBDdCTD	exp1	2h	1	397.754	1674.11	1229.24
39	18	2hIR	190725	5	dDBDdCTD	exp1	2h	18	1127.97	1946.15	189.93
39	19	2hIR	190725	5	dDBDdCTD	exp1	2h	1	290.074	1186.74	72.7989
39	20	2hIR	190725	5	dDBDdCTD	exp1	2h	19	802.025	2316.43	1644.69
39	21	2hIR	190725	5	dDBDdCTD	exp1	2h	2	399.645	1583.29	104.679
39	22	2hIR	190725	5	dDBDdCTD	exp1	2h	3	634.771	2365.1	160.599
39	23	2hIR	190725	5	dDBDdCTD	exp1	2h	32	970.612	3165.07	436.534
39	24	2hIR	190725	5	dDBDdCTD	exp1	2h	5	554.448	1585.16	653.653
39	25	2hIR	190725	5	dDBDdCTD	exp1	2h	20	1277.24	5064.28	406.623
39	26	2hIR	190725	5	dDBDdCTD	exp1	2h	2	148.884	526.245	360.711
39	27	2hIR	190725	5	dDBDdCTD	exp1	2h	15	923.401	3467.92	243.022
39	28	2hIR	190725	5	dDBDdCTD	exp1	2h	3	1015.1	3988.15	2242.51
39	29	2hIR	190725	5	dDBDdCTD	exp1	2h	17	692.356	3014.68	802.117
39	30	2hIR	190725	5	dDBDdCTD	exp1	2h	12	565.602	2902.66	810.623
39	31	2hIR	190725	5	dDBDdCTD	exp1	2h	0	447.096	2506.8	139.515
39	32	2hIR	190725	5	dDBDdCTD	exp1	2h	2	744.258	3558.75	2011.49
39	33	2hIR	190725	5	dDBDdCTD	exp1	2h	30	1019.7	3238.3	841.763
39	34	2hIR	190725	5	dDBDdCTD	exp1	2h	30	963.203	2869.28	1377.97
39	35	2hIR	190725	5	dDBDdCTD	exp1	2h	0	460.778	2281.32	146.861
39	36	2hIR	190725	5	dDBDdCTD	exp1	2h	0	360.365	1965.37	122.193
39	37	2hIR	190725	5	dDBDdCTD	exp1	2h	16	920.983	2409.36	1293.16
39	38	2hIR	190725	5	dDBDdCTD	exp1	2h	2	369.528	1282.84	1460.86
39	39	2hIR	190725	5	dDBDdCTD	exp1	2h	9	876.459	2437.11	182.328
39	40	2hIR	190725	5	dDBDdCTD	exp1	2h	23	790.018	2679.27	196.704
40	1	noIR	190725	5	dDBDdCTD	exp1	noIR	2	571.493	1394.69	4896
40	2	noIR	190725	5	dDBDdCTD	exp1	noIR	11	575.37	1228.18	3814.29
40	3	noIR	190725	5	dDBDdCTD	exp1	noIR	1	949.756	1499.29	257.825
40	4	noIR	190725	5	dDBDdCTD	exp1	noIR	0	663.336	1020.1	1255.24
40	5	noIR	190725	5	dDBDdCTD	exp1	noIR	20	806.383	1544.33	4197.9
40	6	noIR	190725	5	dDBDdCTD	exp1	noIR	13	883.881	2028.35	1108.09
40	7	noIR	190725	5	dDBDdCTD	exp1	noIR	4	1040.9	1858.58	230.949
40	8	noIR	190725	5	dDBDdCTD	exp1	noIR	13	747.227	1562.16	5122.04
40	9	noIR	190725	5	dDBDdCTD	exp1	noIR	15	821.078	2044.27	1853.17
40	10	noIR	190725	5	dDBDdCTD	exp1	noIR	13	757.25	1951	2665.04
40	11	noIR	190725	5	dDBDdCTD	exp1	noIR	13	819.12	2079.94	3077.62
40	12	noIR	190725	5	dDBDdCTD	exp1	noIR	14	569.244	1418.2	3349.24
40	13	noIR	190725	5	dDBDdCTD	exp1	noIR	13	635.727	1383.14	3569.01
40	14	noIR	190725	5	dDBDdCTD	exp1	noIR	6	889.374	1004.99	3807.33
40	15	noIR	190725	5	dDBDdCTD	exp1	noIR	19	803.998	2491.04	4130.64
40	16	noIR	190725	5	dDBDdCTD	exp1	noIR	0	741.94	758.622	1653.1
40	17	noIR	190725	5	dDBDdCTD	exp1	noIR	10	597.706	1934.72	4122.6
40	18	noIR	190725	5	dDBDdCTD	exp1	noIR	4	384.968	603.256	1700
40	19	noIR	190725	5	dDBDdCTD	exp1	noIR	11	569.768	1317.14	3787.6
40	20	noIR	190725	5	dDBDdCTD	exp1	noIR	12	550.195	1224.28	3786.27
40	21	noIR	190725	5	dDBDdCTD	exp1	noIR	17	740.926	2291.02	3582.79
40	22	noIR	190725	5	dDBDdCTD	exp1	noIR	1	993.073	1335.11	195.622
40	23	noIR	190725	5	dDBDdCTD	exp1	noIR	10	601.906	1460.32	3864.81
40	24	noIR	190725	5	dDBDdCTD	exp1	noIR	0	753.444	1449.67	173.754
40	25	noIR	190725	5	dDBDdCTD	exp1	noIR	0	432.772	824.529	87.3327
40	26	noIR	190725	5	dDBDdCTD	exp1	noIR	4	862.928	1987.6	178.366
40	27	noIR	190725	5	dDBDdCTD	exp1	noIR	0	505.513	1043.02	139.246
40	28	noIR	190725	5	dDBDdCTD	exp1	noIR	8	457.575	1020.59	2839.33
40	29	noIR	190725	5	dDBDdCTD	exp1	noIR	17	899.443	2534.08	2282.92
40	30	noIR	190725	5	dDBDdCTD	exp1	noIR	1	334.835	799.048	1363.5
40	31	noIR	190725	5	dDBDdCTD	exp1	noIR	4	454.97	682.822	1702.69
40	32	noIR	190725	5	dDBDdCTD	exp1	noIR	10	768.211	1598.24	2395.59
40	33	noIR	190725	5	dDBDdCTD	exp1	noIR	15	564.587	1425.31	3090.6
40	34	noIR	190725	5	dDBDdCTD	exp1	noIR	14	625.892	1435.48	3753.4
40	35	noIR	190725	5	dDBDdCTD	exp1	noIR	1	392.228	740.644	1199.51
40	36	noIR	190725	5	dDBDdCTD	exp1	noIR	4	414.817	1233.99	2571.72
40	37	noIR	190725	5	dDBDdCTD	exp1	noIR	17	677.417	1257.24	2784.57
41	1	2hIR	190725	6	WT	exp1	2h	25	1037.76	2330.86	1273.24
41	2	2hIR	190725	6	WT	exp1	2h	8	684.06	2174.15	1263.77
41	3	2hIR	190725	6	WT	exp1	2h	16	850.149	2277.89	1693.89
41	4	2hIR	190725	6	WT	exp1	2h	5	589.829	1738.32	1037.26
41	5	2hIR	190725	6	WT	exp1	2h	7	813.897	2834.25	1794.91
41	6	2hIR	190725	6	WT	exp1	2h	33	1221.11	3350.08	1448.92
41	7	2hIR	190725	6	WT	exp1	2h	4	670.216	1596.39	1196.65
41	8	2hIR	190725	6	WT	exp1	2h	29	1011.81	2872.17	1812.95
41	9	2hIR	190725	6	WT	exp1	2h	3	578.181	2990.64	159.272
41	10	2hIR	190725	6	WT	exp1	2h	19	842.161	2658.5	776.018
41	11	2hIR	190725	6	WT	exp1	2h	9	688.407	2370.28	2540.6
41	12	2hIR	190725	6	WT	exp1	2h	1	398.307	1421.07	791.789
41	13	2hIR	190725	6	WT	exp1	2h	1	509.779	1584.92	1059.5
41	14	2hIR	190725	6	WT	exp1	2h	12	892.306	3292.24	324.089
41	15	2hIR	190725	6	WT	exp1	2h	26	930.683	2867.01	682.742
41	16	2hIR	190725	6	WT	exp1	2h	9	580.977	1532.54	1937.23
41	17	2hIR	190725	6	WT	exp1	2h	12	731.416	1541.35	1927.27
41	18	2hIR	190725	6	WT	exp1	2h	0	1703.25	3082.8	293.711
41	19	2hIR	190725	6	WT	exp1	2h	13	517.065	1313.24	1690.8
41	20	2hIR	190725	6	WT	exp1	2h	7	320.966	1241.83	72.6705
41	21	2hIR	190725	6	WT	exp1	2h	8	590.64	1583.09	2010.33
41	22	2hIR	190725	6	WT	exp1	2h	4	226.795	646.467	587.784
41	23	2hIR	190725	6	WT	exp1	2h	39	1104.71	2799.65	3279.39
41	24	2hIR	190725	6	WT	exp1	2h	12	807.412	2379.37	2518.46
41	25	2hIR	190725	6	WT	exp1	2h	12	505.719	2258.69	702.104
41	26	2hIR	190725	6	WT	exp1	2h	11	511.409	1370.14	510.225
41	27	2hIR	190725	6	WT	exp1	2h	5	582.914	1962.6	1759.4
41	28	2hIR	190725	6	WT	exp1	2h	15	636.515	1516.69	532.294
41	29	2hIR	190725	6	WT	exp1	2h	16	781.445	2179.88	2406.12
41	30	2hIR	190725	6	WT	exp1	2h	7	247.909	771.491	68.1731
41	31	2hIR	190725	6	WT	exp1	2h	7	345.83	831.067	796.244
41	32	2hIR	190725	6	WT	exp1	2h	21	727.484	2641.89	2644.11
41	33	2hIR	190725	6	WT	exp1	2h	28	904.679	3560.32	1308.85
41	34	2hIR	190725	6	WT	exp1	2h	12	471.102	1098.15	973.582
41	35	2hIR	190725	6	WT	exp1	2h	13	1575.65	4659.05	249.427
41	36	2hIR	190725	6	WT	exp1	2h	18	777.217	2381.33	2362.92
41	37	2hIR	190725	6	WT	exp1	2h	12	551.306	1616.35	1260.36
41	38	2hIR	190725	6	WT	exp1	2h	9	558.077	2658.27	2141.51
41	39	2hIR	190725	6	WT	exp1	2h	24	1374.89	4056.07	818.026
41	40	2hIR	190725	6	WT	exp1	2h	21	854.465	3198.7	1470.15
41	41	2hIR	190725	6	WT	exp1	2h	11	874.23	2915.35	1494.52
41	42	2hIR	190725	6	WT	exp1	2h	35	1269.39	3899.82	199.581
41	43	2hIR	190725	6	WT	exp1	2h	27	968.879	2074.86	2631.6
41	44	2hIR	190725	6	WT	exp1	2h	19	917.896	2501.55	2235.48
41	45	2hIR	190725	6	WT	exp1	2h	28	1003.37	2078.54	2626.92
41	46	2hIR	190725	6	WT	exp1	2h	23	820.786	2497.62	2976.4
42	1	noIR	190725	6	WT	exp1	noIR	3	2626.09	2038.68	2627.02
42	2	noIR	190725	6	WT	exp1	noIR	2	1181	891.55	1450.69
42	3	noIR	190725	6	WT	exp1	noIR	14	3905.01	3603.47	1517.61
42	4	noIR	190725	6	WT	exp1	noIR	5	1312.46	808.703	568.295
42	5	noIR	190725	6	WT	exp1	noIR	3	2001.2	2118.72	3208.61
42	6	noIR	190725	6	WT	exp1	noIR	4	1523.15	921.785	724.156
42	7	noIR	190725	6	WT	exp1	noIR	15	3951.9	3824.5	3753.19
42	8	noIR	190725	6	WT	exp1	noIR	10	2304.81	2623.48	2831.47
42	9	noIR	190725	6	WT	exp1	noIR	5	1748.96	1883.58	3240.33
42	10	noIR	190725	6	WT	exp1	noIR	9	2196.87	2715.39	3643.99
42	11	noIR	190725	6	WT	exp1	noIR	15	3298.77	2867.91	4415.48
42	12	noIR	190725	6	WT	exp1	noIR	5	2583.63	2644.96	216.29
42	13	noIR	190725	6	WT	exp1	noIR	6	2310.41	2767.39	2640.52
42	14	noIR	190725	6	WT	exp1	noIR	3	2582.31	2539.17	223.859
42	15	noIR	190725	6	WT	exp1	noIR	12	4908.58	3826.89	5631.75
42	16	noIR	190725	6	WT	exp1	noIR	5	1406.67	1542.5	2224.15
42	17	noIR	190725	6	WT	exp1	noIR	7	2468.5	3000.15	1126.56
42	18	noIR	190725	6	WT	exp1	noIR	14	2363.69	2846.26	1687.31
42	19	noIR	190725	6	WT	exp1	noIR	1	1644.86	1571.61	2330.42
42	20	noIR	190725	6	WT	exp1	noIR	1	727.366	442.253	312.19
42	21	noIR	190725	6	WT	exp1	noIR	1	1675.83	1215.26	2527.13
42	22	noIR	190725	6	WT	exp1	noIR	2	934.521	734.838	874.278
42	23	noIR	190725	6	WT	exp1	noIR	0	3123.62	3194.08	243.497
42	24	noIR	190725	6	WT	exp1	noIR	0	1387.62	1371.84	1700.3
42	25	noIR	190725	6	WT	exp1	noIR	9	2636.07	2654.18	1696.72
42	26	noIR	190725	6	WT	exp1	noIR	3	2489.56	2484.59	201.561
42	27	noIR	190725	6	WT	exp1	noIR	13	2505.07	2270.13	1797.81
42	28	noIR	190725	6	WT	exp1	noIR	3	1987.86	2352.41	204.538
42	29	noIR	190725	6	WT	exp1	noIR	8	2373.19	1452.05	3027.82
42	30	noIR	190725	6	WT	exp1	noIR	0	1296.89	1076.97	1247.98
43	1	2hIR	190725	6	dCTD	exp1	2h	2	185.274	319.424	103.505
43	2	2hIR	190725	6	dCTD	exp1	2h	12	641.207	1139.96	1337.96
43	3	2hIR	190725	6	dCTD	exp1	2h	15	755.252	1693.08	214.017
43	4	2hIR	190725	6	dCTD	exp1	2h	21	823.74	1600.31	1078.07
43	5	2hIR	190725	6	dCTD	exp1	2h	12	900.089	2441.49	177.709
43	6	2hIR	190725	6	dCTD	exp1	2h	8	719.629	1392.17	127.539
43	7	2hIR	190725	6	dCTD	exp1	2h	21	1478.36	3370.9	3301.36
43	8	2hIR	190725	6	dCTD	exp1	2h	1	485.652	1011.18	90.0457
43	9	2hIR	190725	6	dCTD	exp1	2h	1	599.343	1233.64	136.89
43	10	2hIR	190725	6	dCTD	exp1	2h	7	387.801	729.185	1215.02
43	11	2hIR	190725	6	dCTD	exp1	2h	3	327.833	738.63	976.354
43	12	2hIR	190725	6	dCTD	exp1	2h	30	957.119	2069.72	1082.21
43	13	2hIR	190725	6	dCTD	exp1	2h	6	282.113	806.384	868.017
43	14	2hIR	190725	6	dCTD	exp1	2h	24	757.493	1842.56	2527.07
43	15	2hIR	190725	6	dCTD	exp1	2h	3	744.821	1849.83	1405.34
43	16	2hIR	190725	6	dCTD	exp1	2h	1	157.479	576.512	496.62
43	17	2hIR	190725	6	dCTD	exp1	2h	5	467.585	1166.05	953.049
43	18	2hIR	190725	6	dCTD	exp1	2h	7	669.827	1734.3	1141.62
43	19	2hIR	190725	6	dCTD	exp1	2h	1	1255.44	2478.29	195.647
43	20	2hIR	190725	6	dCTD	exp1	2h	24	1003.57	2076.8	3062.29
43	21	2hIR	190725	6	dCTD	exp1	2h	18	965.809	2145.91	3002.12
43	22	2hIR	190725	6	dCTD	exp1	2h	15	606.475	1937.1	2311.54
43	23	2hIR	190725	6	dCTD	exp1	2h	8	592.598	2086.66	2372.54
43	24	2hIR	190725	6	dCTD	exp1	2h	5	756.785	1847.44	3068.19
43	25	2hIR	190725	6	dCTD	exp1	2h	14	745.803	2326.51	2702.17
43	26	2hIR	190725	6	dCTD	exp1	2h	0	523.223	1352.08	747.11
43	27	2hIR	190725	6	dCTD	exp1	2h	11	715.381	2271.26	2269.85
43	28	2hIR	190725	6	dCTD	exp1	2h	5	640.08	1856.41	1919.36
43	29	2hIR	190725	6	dCTD	exp1	2h	4	670.234	2345.02	2351.62
43	30	2hIR	190725	6	dCTD	exp1	2h	23	943.423	2395.13	2537.6
43	31	2hIR	190725	6	dCTD	exp1	2h	6	755.591	1798.56	1939.2
43	32	2hIR	190725	6	dCTD	exp1	2h	14	924.187	2692.22	2329.03
43	33	2hIR	190725	6	dCTD	exp1	2h	0	501.282	1562.4	399.482
43	34	2hIR	190725	6	dCTD	exp1	2h	20	1091.83	1741.93	1001
43	35	2hIR	190725	6	dCTD	exp1	2h	25	1060.24	2361.84	2015.14
44	1	noIR	190725	6	dCTD	exp1	noIR	3	640.275	1572.82	974.909
44	2	noIR	190725	6	dCTD	exp1	noIR	3	478.509	1773.69	1104.02
44	3	noIR	190725	6	dCTD	exp1	noIR	16	1779.06	1562.87	1478.57
44	4	noIR	190725	6	dCTD	exp1	noIR	0	453.098	996.327	119.189
44	5	noIR	190725	6	dCTD	exp1	noIR	0	631.61	1029.76	821.978
44	6	noIR	190725	6	dCTD	exp1	noIR	0	598.687	1002.3	437.806
45	1	2hIR	190725	6	dDBD	exp1	2h	17	824.916	2642.89	3822.26
45	2	2hIR	190725	6	dDBD	exp1	2h	6	681.771	1818.52	1242.18
45	3	2hIR	190725	6	dDBD	exp1	2h	6	535.437	1184.79	1163.75
45	4	2hIR	190725	6	dDBD	exp1	2h	11	668.5	2512.23	2814.47
45	5	2hIR	190725	6	dDBD	exp1	2h	3	284.284	991.549	1335.18
45	6	2hIR	190725	6	dDBD	exp1	2h	27	843.938	2994.92	641.901
45	7	2hIR	190725	6	dDBD	exp1	2h	3	510.956	2197.65	2694.43
45	8	2hIR	190725	6	dDBD	exp1	2h	22	799.991	2871.93	255.062
45	9	2hIR	190725	6	dDBD	exp1	2h	21	631.129	2458.01	2176.27
45	10	2hIR	190725	6	dDBD	exp1	2h	29	1055.92	2677.88	987.255
45	11	2hIR	190725	6	dDBD	exp1	2h	10	430.587	2089.18	1637.35
45	12	2hIR	190725	6	dDBD	exp1	2h	14	1142.02	5085.21	4698.75
45	13	2hIR	190725	6	dDBD	exp1	2h	22	590.85	2629.39	2467.64
45	14	2hIR	190725	6	dDBD	exp1	2h	21	651.301	2475.2	2587.55
45	15	2hIR	190725	6	dDBD	exp1	2h	11	572.207	2261.06	1948.46
45	16	2hIR	190725	6	dDBD	exp1	2h	25	661.34	3062.2	1831.68
45	17	2hIR	190725	6	dDBD	exp1	2h	35	874.723	2778.58	163.452
45	18	2hIR	190725	6	dDBD	exp1	2h	10	598.626	2011.8	663.98
45	19	2hIR	190725	6	dDBD	exp1	2h	20	709.252	2711.03	1362.32
45	20	2hIR	190725	6	dDBD	exp1	2h	12	434.237	2204.42	1472.93
45	21	2hIR	190725	6	dDBD	exp1	2h	35	920.177	2520.27	1679.83
45	22	2hIR	190725	6	dDBD	exp1	2h	3	307.457	1438.03	946.178
45	23	2hIR	190725	6	dDBD	exp1	2h	14	575.251	2427.06	2244.46
45	24	2hIR	190725	6	dDBD	exp1	2h	18	701.999	2379.13	2074.52
45	25	2hIR	190725	6	dDBD	exp1	2h	0	376.515	1814.16	1218.61
45	26	2hIR	190725	6	dDBD	exp1	2h	13	669.347	2112.73	2044.15
45	27	2hIR	190725	6	dDBD	exp1	2h	6	215.151	729.429	205.18
45	28	2hIR	190725	6	dDBD	exp1	2h	22	703.601	2221.04	2430.87
45	29	2hIR	190725	6	dDBD	exp1	2h	6	455.774	1851.09	1916.31
45	30	2hIR	190725	6	dDBD	exp1	2h	20	760.935	2592.17	2319.02
45	31	2hIR	190725	6	dDBD	exp1	2h	16	582.28	2416.58	2468.23
45	32	2hIR	190725	6	dDBD	exp1	2h	13	552.445	2707.1	3654.45
45	33	2hIR	190725	6	dDBD	exp1	2h	20	570.841	2432.53	2367.31
45	34	2hIR	190725	6	dDBD	exp1	2h	12	442.638	2230.15	2292.16
45	35	2hIR	190725	6	dDBD	exp1	2h	6	460.836	2040.86	2868.73
45	36	2hIR	190725	6	dDBD	exp1	2h	25	935.929	3912.74	505.325
45	37	2hIR	190725	6	dDBD	exp1	2h	15	772.334	2384.93	2663.14
45	38	2hIR	190725	6	dDBD	exp1	2h	11	671.218	2115.07	2779.81
45	39	2hIR	190725	6	dDBD	exp1	2h	20	755.879	3198.35	1608.77
45	40	2hIR	190725	6	dDBD	exp1	2h	6	596.919	3855.71	1720.1
45	41	2hIR	190725	6	dDBD	exp1	2h	13	543.101	2301.1	3654.52
45	42	2hIR	190725	6	dDBD	exp1	2h	9	504.539	2309.94	3038.35
45	43	2hIR	190725	6	dDBD	exp1	2h	28	812.647	2558.9	3399.58
46	1	noIR	190725	6	dDBD	exp1	noIR	0	786.609	2124.8	264.531
46	2	noIR	190725	6	dDBD	exp1	noIR	22	970.983	1863.43	2334.3
46	3	noIR	190725	6	dDBD	exp1	noIR	1	903.093	2302.76	206.435
46	4	noIR	190725	6	dDBD	exp1	noIR	2	487.277	1315.19	1861.04
46	5	noIR	190725	6	dDBD	exp1	noIR	2	894.672	1815.38	236.075
46	6	noIR	190725	6	dDBD	exp1	noIR	10	1010.32	2623.34	1038.28
46	7	noIR	190725	6	dDBD	exp1	noIR	6	711.816	1916.02	3437.23
46	8	noIR	190725	6	dDBD	exp1	noIR	0	1230.24	2424.98	245.769
46	9	noIR	190725	6	dDBD	exp1	noIR	13	839.187	2528.38	2019.56
46	10	noIR	190725	6	dDBD	exp1	noIR	7	793.412	2222.95	359.968
46	11	noIR	190725	6	dDBD	exp1	noIR	7	518.707	1730.26	781.392
46	12	noIR	190725	6	dDBD	exp1	noIR	13	536.914	1565.53	1004.72
46	13	noIR	190725	6	dDBD	exp1	noIR	0	234.098	891.395	59.8973
46	14	noIR	190725	6	dDBD	exp1	noIR	10	580.601	1510.73	1619.02
46	15	noIR	190725	6	dDBD	exp1	noIR	7	1722.6	3664.04	2618.64
46	16	noIR	190725	6	dDBD	exp1	noIR	17	980.566	1685.34	4304.89
46	17	noIR	190725	6	dDBD	exp1	noIR	12	554.313	2062.41	1133.7
46	18	noIR	190725	6	dDBD	exp1	noIR	15	879.069	2962.77	490.751
46	19	noIR	190725	6	dDBD	exp1	noIR	10	520.001	2015.87	2904.13
46	20	noIR	190725	6	dDBD	exp1	noIR	0	545.381	1122.04	148.406
46	21	noIR	190725	6	dDBD	exp1	noIR	8	705.242	2179.28	3208.44
46	22	noIR	190725	6	dDBD	exp1	noIR	0	279.808	978.19	65.212
46	23	noIR	190725	6	dDBD	exp1	noIR	2	211.768	747.152	959.214
46	24	noIR	190725	6	dDBD	exp1	noIR	0	518.797	1492.41	1169.27
46	25	noIR	190725	6	dDBD	exp1	noIR	7	709.966	2839.06	829.565
46	26	noIR	190725	6	dDBD	exp1	noIR	2	885.873	1942.44	199.035
46	27	noIR	190725	6	dDBD	exp1	noIR	1	581.915	1588.28	1324.38
46	28	noIR	190725	6	dDBD	exp1	noIR	8	528.642	2067.66	3455.01
46	29	noIR	190725	6	dDBD	exp1	noIR	2	674.526	1939.39	3592.15
46	30	noIR	190725	6	dDBD	exp1	noIR	9	600.687	1649.47	2774.31
46	31	noIR	190725	6	dDBD	exp1	noIR	15	1005.53	1621.72	3979.91
46	32	noIR	190725	6	dDBD	exp1	noIR	0	587.759	1689.37	2905.17
46	33	noIR	190725	6	dDBD	exp1	noIR	0	126.453	591.471	34.8479
46	34	noIR	190725	6	dDBD	exp1	noIR	3	359.109	1278.5	1111.49
46	35	noIR	190725	6	dDBD	exp1	noIR	0	82.7195	292.362	27.3121
46	36	noIR	190725	6	dDBD	exp1	noIR	16	822.903	2845.17	623.217
46	37	noIR	190725	6	dDBD	exp1	noIR	0	562.242	1328.82	136.38
46	38	noIR	190725	6	dDBD	exp1	noIR	0	145.973	459.149	38.3005
46	39	noIR	190725	6	dDBD	exp1	noIR	0	477.548	1211.59	119.453
46	40	noIR	190725	6	dDBD	exp1	noIR	4	859.452	2675.35	226.159
46	41	noIR	190725	6	dDBD	exp1	noIR	12	778.041	2013.71	3993.55
46	42	noIR	190725	6	dDBD	exp1	noIR	5	431.901	1664.08	2613.27
46	43	noIR	190725	6	dDBD	exp1	noIR	0	327.54	1018.02	80.4365
46	44	noIR	190725	6	dDBD	exp1	noIR	5	611.994	2350.58	317.812
46	45	noIR	190725	6	dDBD	exp1	noIR	1	625.691	1278.2	150.131
46	46	noIR	190725	6	dDBD	exp1	noIR	6	494.598	1689.8	3353.83
46	47	noIR	190725	6	dDBD	exp1	noIR	2	1109.44	2328.8	235.435
46	48	noIR	190725	6	dDBD	exp1	noIR	26	997.318	2477.77	4163.21
46	49	noIR	190725	6	dDBD	exp1	noIR	1	475.27	896.292	113.401
47	1	2hIR	190725	6	dDBDdCTD	exp1	2h	4	1119.97	3000.32	243.128
47	2	2hIR	190725	6	dDBDdCTD	exp1	2h	21	988.002	2595.61	995.623
47	3	2hIR	190725	6	dDBDdCTD	exp1	2h	10	533.63	1348.32	1140.54
47	4	2hIR	190725	6	dDBDdCTD	exp1	2h	14	609.627	1412.4	1981.49
47	5	2hIR	190725	6	dDBDdCTD	exp1	2h	13	488.855	1648.92	1167.64
47	6	2hIR	190725	6	dDBDdCTD	exp1	2h	8	359.072	1044.23	516.022
47	7	2hIR	190725	6	dDBDdCTD	exp1	2h	6	537.607	1645.31	1157.87
47	8	2hIR	190725	6	dDBDdCTD	exp1	2h	10	363.581	1011.1	388.155
47	9	2hIR	190725	6	dDBDdCTD	exp1	2h	32	1176.13	3800.97	1360.6
47	10	2hIR	190725	6	dDBDdCTD	exp1	2h	2	559.533	2100.23	2219.07
47	11	2hIR	190725	6	dDBDdCTD	exp1	2h	0	624.893	2262.24	151.57
47	12	2hIR	190725	6	dDBDdCTD	exp1	2h	11	668.855	2067.88	162.409
47	13	2hIR	190725	6	dDBDdCTD	exp1	2h	7	443.611	1389.95	822.811
47	14	2hIR	190725	6	dDBDdCTD	exp1	2h	14	478.201	1485.46	1091.22
47	15	2hIR	190725	6	dDBDdCTD	exp1	2h	1	598.302	2131.16	149.318
47	16	2hIR	190725	6	dDBDdCTD	exp1	2h	14	651.236	1405.14	2147.78
47	17	2hIR	190725	6	dDBDdCTD	exp1	2h	29	871.646	3496.99	1423.99
47	18	2hIR	190725	6	dDBDdCTD	exp1	2h	0	391.589	1477.62	112.704
47	19	2hIR	190725	6	dDBDdCTD	exp1	2h	11	668.875	2226.39	2332.58
47	20	2hIR	190725	6	dDBDdCTD	exp1	2h	1	1220.51	2537.18	209.833
47	21	2hIR	190725	6	dDBDdCTD	exp1	2h	0	1177.82	2808.33	245.383
47	22	2hIR	190725	6	dDBDdCTD	exp1	2h	27	951.192	3682.17	2748.05
47	23	2hIR	190725	6	dDBDdCTD	exp1	2h	26	1610.08	5733.5	3958.22
47	24	2hIR	190725	6	dDBDdCTD	exp1	2h	1	395.226	1727.42	1399.81
47	25	2hIR	190725	6	dDBDdCTD	exp1	2h	19	705.05	1847.76	1931.49
47	26	2hIR	190725	6	dDBDdCTD	exp1	2h	2	271.901	768.764	766.823
47	27	2hIR	190725	6	dDBDdCTD	exp1	2h	0	134.653	716.069	273.661
47	28	2hIR	190725	6	dDBDdCTD	exp1	2h	1	218.973	1409.93	648.592
47	29	2hIR	190725	6	dDBDdCTD	exp1	2h	9	943.12	2816.38	265.092
47	30	2hIR	190725	6	dDBDdCTD	exp1	2h	10	609.365	1723.26	1832.58
48	1	noIR	190725	6	dDBDdCTD	exp1	noIR	9	651.262	2015.78	1692.69
48	2	noIR	190725	6	dDBDdCTD	exp1	noIR	0	800.919	1527.33	187.859
48	3	noIR	190725	6	dDBDdCTD	exp1	noIR	9	397.095	778.993	820.117
48	4	noIR	190725	6	dDBDdCTD	exp1	noIR	12	469.926	961.957	841.627
48	5	noIR	190725	6	dDBDdCTD	exp1	noIR	7	532.704	1166.4	3509.25
48	6	noIR	190725	6	dDBDdCTD	exp1	noIR	23	822.931	1949.79	350.09
48	7	noIR	190725	6	dDBDdCTD	exp1	noIR	0	94.6868	378.997	36.8558
48	8	noIR	190725	6	dDBDdCTD	exp1	noIR	2	442.852	1234.52	3560.23
48	9	noIR	190725	6	dDBDdCTD	exp1	noIR	0	791.347	2307.32	204.251
48	10	noIR	190725	6	dDBDdCTD	exp1	noIR	7	486.562	1288.83	2425.64
48	11	noIR	190725	6	dDBDdCTD	exp1	noIR	0	157.888	587.835	47.501
48	12	noIR	190725	6	dDBDdCTD	exp1	noIR	0	317.176	931.085	2053.23
48	13	noIR	190725	6	dDBDdCTD	exp1	noIR	0	142.383	446.703	43.4185
48	14	noIR	190725	6	dDBDdCTD	exp1	noIR	22	897.257	2296.29	3025.3
48	15	noIR	190725	6	dDBDdCTD	exp1	noIR	14	515.95	1427.59	2634.38
48	16	noIR	190725	6	dDBDdCTD	exp1	noIR	31	1003.86	2345.84	3059.81
48	17	noIR	190725	6	dDBDdCTD	exp1	noIR	0	182.049	291.685	615.366
48	18	noIR	190725	6	dDBDdCTD	exp1	noIR	1	375.573	1116.18	2763.58
48	19	noIR	190725	6	dDBDdCTD	exp1	noIR	3	405.284	1046.76	2704.32
48	20	noIR	190725	6	dDBDdCTD	exp1	noIR	0	259.185	368.581	1041.78
48	21	noIR	190725	6	dDBDdCTD	exp1	noIR	22	843.655	2492.04	3599.67
48	22	noIR	190725	6	dDBDdCTD	exp1	noIR	0	117.193	326.54	31.2979
48	23	noIR	190725	6	dDBDdCTD	exp1	noIR	20	640.209	1518.53	3753.48
48	24	noIR	190725	6	dDBDdCTD	exp1	noIR	28	773.267	1334.25	3971.19
48	25	noIR	190725	6	dDBDdCTD	exp1	noIR	23	683.442	1399.32	2705.44
48	26	noIR	190725	6	dDBDdCTD	exp1	noIR	0	494.881	876.333	2287.33
49	1	2hIR	190802	1	WT	exp1	2h	6	720.526	2694.03	235.541
49	2	2hIR	190802	1	WT	exp1	2h	31	896.433	2747.55	574.51
49	3	2hIR	190802	1	WT	exp1	2h	34	1613.84	3344.68	270.137
49	4	2hIR	190802	1	WT	exp1	2h	18	998.91	3210.14	312.695
49	5	2hIR	190802	1	WT	exp1	2h	24	978.259	3280.72	762.484
49	6	2hIR	190802	1	WT	exp1	2h	8	572.657	1580.83	411.437
49	7	2hIR	190802	1	WT	exp1	2h	31	1116.7	3632.17	323.639
49	8	2hIR	190802	1	WT	exp1	2h	28	797.653	3186.74	564.418
49	9	2hIR	190802	1	WT	exp1	2h	20	999.727	3165.26	341.439
49	10	2hIR	190802	1	WT	exp1	2h	30	1184.65	2886.47	472.878
49	11	2hIR	190802	1	WT	exp1	2h	13	643.129	2037.4	553.386
49	12	2hIR	190802	1	WT	exp1	2h	28	1074.21	3552.76	803.999
49	13	2hIR	190802	1	WT	exp1	2h	9	459.285	1543.84	108.469
49	14	2hIR	190802	1	WT	exp1	2h	23	858.287	2867.41	259.674
49	15	2hIR	190802	1	WT	exp1	2h	15	583.864	1586.44	437.802
49	16	2hIR	190802	1	WT	exp1	2h	21	548.503	2549.85	498.972
49	17	2hIR	190802	1	WT	exp1	2h	26	1091.32	4063.77	742.162
49	18	2hIR	190802	1	WT	exp1	2h	17	1173.18	4572.37	786.216
49	19	2hIR	190802	1	WT	exp1	2h	16	1182.58	4839.18	703.074
49	20	2hIR	190802	1	WT	exp1	2h	18	735.829	3656.21	775.62
49	21	2hIR	190802	1	WT	exp1	2h	22	1200.95	3631.05	241.421
49	22	2hIR	190802	1	WT	exp1	2h	9	569.785	1549.89	631.447
49	23	2hIR	190802	1	WT	exp1	2h	17	771.058	3248.25	678.737
49	24	2hIR	190802	1	WT	exp1	2h	31	951.521	3105.14	721.935
50	1	noIR	190802	1	WT	exp1	noIR	0	276.5	1143.19	73.0863
50	2	noIR	190802	1	WT	exp1	noIR	7	1704	2073.28	224.567
50	3	noIR	190802	1	WT	exp1	noIR	8	671.253	1481.45	558.431
50	4	noIR	190802	1	WT	exp1	noIR	0	290.137	583.728	65.6551
50	5	noIR	190802	1	WT	exp1	noIR	3	641.252	1289.68	129.376
50	6	noIR	190802	1	WT	exp1	noIR	29	1116.01	2783.96	545.945
50	7	noIR	190802	1	WT	exp1	noIR	1	408.03	1276.87	184.667
50	8	noIR	190802	1	WT	exp1	noIR	11	1113.11	2382.13	880.069
50	9	noIR	190802	1	WT	exp1	noIR	28	1085.2	2560.66	901.429
50	10	noIR	190802	1	WT	exp1	noIR	1	553.398	1332.21	473.256
50	11	noIR	190802	1	WT	exp1	noIR	30	1168.25	2768.6	910.094
50	12	noIR	190802	1	WT	exp1	noIR	17	648.06	2251.08	398.585
50	13	noIR	190802	1	WT	exp1	noIR	5	968.052	2386.58	728.067
50	14	noIR	190802	1	WT	exp1	noIR	0	580.359	1767.23	478.203
50	15	noIR	190802	1	WT	exp1	noIR	4	1932.95	3365.13	308.49
50	16	noIR	190802	1	WT	exp1	noIR	2	374.746	1363.09	240.185
50	17	noIR	190802	1	WT	exp1	noIR	15	1262.9	3247.53	460.175
50	18	noIR	190802	1	WT	exp1	noIR	0	363.705	1194.65	202.618
50	19	noIR	190802	1	WT	exp1	noIR	0	238.688	924.033	60.7423
50	20	noIR	190802	1	WT	exp1	noIR	17	1024.13	2849.41	579.893
50	21	noIR	190802	1	WT	exp1	noIR	6	731.422	1936.1	624.401
50	22	noIR	190802	1	WT	exp1	noIR	8	953.189	2715.95	855.754
50	23	noIR	190802	1	WT	exp1	noIR	30	1191.62	2836.68	938.371
50	24	noIR	190802	1	WT	exp1	noIR	23	1070.41	3070.29	508.597
50	25	noIR	190802	1	WT	exp1	noIR	21	1052.4	2919.63	622.194
50	26	noIR	190802	1	WT	exp1	noIR	28	1079.95	3032.72	919.399
50	27	noIR	190802	1	WT	exp1	noIR	10	899.354	3396.53	343.793
50	28	noIR	190802	1	WT	exp1	noIR	10	790.646	2626.37	478.682
50	29	noIR	190802	1	WT	exp1	noIR	7	527.649	1501.26	317.718
50	30	noIR	190802	1	WT	exp1	noIR	5	714.577	2425.07	295.342
50	31	noIR	190802	1	WT	exp1	noIR	12	559.322	2308.72	310.376
50	32	noIR	190802	1	WT	exp1	noIR	26	1390.74	2565.69	623.165
50	33	noIR	190802	1	WT	exp1	noIR	24	1280.17	3418.34	820.989
50	34	noIR	190802	1	WT	exp1	noIR	4	767.603	2579.68	499.339
51	1	2hIR	190802	1	dCTD	exp1	2h	22	766.942	1220.74	1357.61
51	2	2hIR	190802	1	dCTD	exp1	2h	22	620.62	1606.53	865.011
51	3	2hIR	190802	1	dCTD	exp1	2h	12	617.243	1660.42	736.857
51	4	2hIR	190802	1	dCTD	exp1	2h	22	598.662	1872.28	1048.12
51	5	2hIR	190802	1	dCTD	exp1	2h	17	632.281	1990.43	763.5
51	6	2hIR	190802	1	dCTD	exp1	2h	28	787.011	1396.89	1068.41
51	7	2hIR	190802	1	dCTD	exp1	2h	3	390.586	1379.42	424.047
51	8	2hIR	190802	1	dCTD	exp1	2h	21	628.631	2105.69	790.879
51	9	2hIR	190802	1	dCTD	exp1	2h	2	324.565	1163.8	334.102
51	10	2hIR	190802	1	dCTD	exp1	2h	7	457.639	1392.69	828.619
51	11	2hIR	190802	1	dCTD	exp1	2h	0	220.056	877.46	64.0261
51	12	2hIR	190802	1	dCTD	exp1	2h	26	687.921	2431.04	797.446
51	13	2hIR	190802	1	dCTD	exp1	2h	0	733.592	3433.84	222.866
51	14	2hIR	190802	1	dCTD	exp1	2h	0	643.516	2476.3	211.465
51	15	2hIR	190802	1	dCTD	exp1	2h	10	576.108	2094.21	992.637
51	16	2hIR	190802	1	dCTD	exp1	2h	18	657.592	2308.5	1151.31
51	17	2hIR	190802	1	dCTD	exp1	2h	22	694.619	2258.37	845.683
51	18	2hIR	190802	1	dCTD	exp1	2h	0	191.69	832.396	65.436
51	19	2hIR	190802	1	dCTD	exp1	2h	24	833.234	3288.44	490.544
51	20	2hIR	190802	1	dCTD	exp1	2h	44	866.591	2901.11	492.431
51	21	2hIR	190802	1	dCTD	exp1	2h	0	109.466	752.017	141.877
51	22	2hIR	190802	1	dCTD	exp1	2h	18	644.326	2286.4	1459.13
51	23	2hIR	190802	1	dCTD	exp1	2h	0	123.486	624.03	146.194
51	24	2hIR	190802	1	dCTD	exp1	2h	6	551.33	2502.63	1121.99
51	25	2hIR	190802	1	dCTD	exp1	2h	32	1223.8	2451.79	677.194
51	26	2hIR	190802	1	dCTD	exp1	2h	5	550.179	3070.69	752.173
51	27	2hIR	190802	1	dCTD	exp1	2h	14	677.372	2032.7	1426.97
51	28	2hIR	190802	1	dCTD	exp1	2h	34	970.56	2830.64	1009.95
51	29	2hIR	190802	1	dCTD	exp1	2h	44	1222.44	3028.75	259.654
51	30	2hIR	190802	1	dCTD	exp1	2h	27	865.336	2271.39	1478.02
51	31	2hIR	190802	1	dCTD	exp1	2h	41	1096.28	1996.44	577.309
52	1	noIR	190802	1	dCTD	exp1	noIR	0	586.971	990.191	106.013
52	2	noIR	190802	1	dCTD	exp1	noIR	2	824.792	2445.79	684.106
52	3	noIR	190802	1	dCTD	exp1	noIR	0	1413.32	1729.11	215.434
52	4	noIR	190802	1	dCTD	exp1	noIR	25	1435.5	3198.5	1095.34
52	5	noIR	190802	1	dCTD	exp1	noIR	25	1719.52	3159.17	1488.39
52	6	noIR	190802	1	dCTD	exp1	noIR	0	828.398	2023.57	183.844
52	7	noIR	190802	1	dCTD	exp1	noIR	15	1427.5	3295.25	1282.63
52	8	noIR	190802	1	dCTD	exp1	noIR	4	764.138	1618.05	862.27
52	9	noIR	190802	1	dCTD	exp1	noIR	2	1134.73	2988.28	230.937
52	10	noIR	190802	1	dCTD	exp1	noIR	0	556.448	2121.4	381.849
52	11	noIR	190802	1	dCTD	exp1	noIR	18	1379.5	3250.5	1100.65
52	12	noIR	190802	1	dCTD	exp1	noIR	13	1237.91	2337.92	765.937
52	13	noIR	190802	1	dCTD	exp1	noIR	16	1491.14	4052.34	622.905
52	14	noIR	190802	1	dCTD	exp1	noIR	17	961.954	3185.12	1122.25
52	15	noIR	190802	1	dCTD	exp1	noIR	5	496.996	1494.06	490.935
52	16	noIR	190802	1	dCTD	exp1	noIR	10	1100.24	3024.19	180.205
52	17	noIR	190802	1	dCTD	exp1	noIR	0	988.29	3239.91	206.727
52	18	noIR	190802	1	dCTD	exp1	noIR	7	817.88	3124.98	787.047
52	19	noIR	190802	1	dCTD	exp1	noIR	2	1226	2350.73	232.939
52	20	noIR	190802	1	dCTD	exp1	noIR	4	501.251	1499.9	538.393
52	21	noIR	190802	1	dCTD	exp1	noIR	7	367.238	987.658	400.862
52	22	noIR	190802	1	dCTD	exp1	noIR	0	693.051	2270.01	245.913
52	23	noIR	190802	1	dCTD	exp1	noIR	0	881.758	2780.08	165.768
52	24	noIR	190802	1	dCTD	exp1	noIR	3	1266.08	3473.72	249.314
52	25	noIR	190802	1	dCTD	exp1	noIR	12	692.924	2275.29	897.27
52	26	noIR	190802	1	dCTD	exp1	noIR	0	566.048	1991.83	146.924
52	27	noIR	190802	1	dCTD	exp1	noIR	4	394.795	1067.7	342.615
52	28	noIR	190802	1	dCTD	exp1	noIR	2	1034.98	2755.04	208.816
52	29	noIR	190802	1	dCTD	exp1	noIR	1	1280.04	3225.26	222.474
52	30	noIR	190802	1	dCTD	exp1	noIR	4	1241.51	2377.47	218.301
52	31	noIR	190802	1	dCTD	exp1	noIR	0	751.836	1826.81	422.744
52	32	noIR	190802	1	dCTD	exp1	noIR	7	437.157	1052.71	409.59
52	33	noIR	190802	1	dCTD	exp1	noIR	0	652.355	1622.38	384.767
52	34	noIR	190802	1	dCTD	exp1	noIR	5	1556.77	3209.78	260.757
52	35	noIR	190802	1	dCTD	exp1	noIR	7	845.141	1897.85	162.559
53	1	2hIR	190802	1	dDBD	exp1	2h	12	436.725	1230.18	1655.03
53	2	2hIR	190802	1	dDBD	exp1	2h	21	553.578	1663.28	1368.37
53	3	2hIR	190802	1	dDBD	exp1	2h	14	664.504	2566.36	614.496
53	4	2hIR	190802	1	dDBD	exp1	2h	15	893.884	2038.58	1041.56
53	5	2hIR	190802	1	dDBD	exp1	2h	27	733.814	2651.43	545.056
53	6	2hIR	190802	1	dDBD	exp1	2h	10	347.009	1263.99	1333.56
53	7	2hIR	190802	1	dDBD	exp1	2h	15	662.339	2457.07	1547.05
53	8	2hIR	190802	1	dDBD	exp1	2h	26	741.06	2381.7	2148.82
53	9	2hIR	190802	1	dDBD	exp1	2h	17	886.152	2779.97	1754.44
53	10	2hIR	190802	1	dDBD	exp1	2h	11	477.232	2131.27	2068.38
53	11	2hIR	190802	1	dDBD	exp1	2h	23	722.367	2923.12	1742.8
53	12	2hIR	190802	1	dDBD	exp1	2h	8	439.18	1981.56	1963.16
53	13	2hIR	190802	1	dDBD	exp1	2h	16	475.734	1592.98	1025.95
53	14	2hIR	190802	1	dDBD	exp1	2h	12	329.276	1116.87	742.249
53	15	2hIR	190802	1	dDBD	exp1	2h	21	678.528	3155.1	2060.14
53	16	2hIR	190802	1	dDBD	exp1	2h	24	1286.14	5689.88	1875.71
53	17	2hIR	190802	1	dDBD	exp1	2h	11	518.596	2536.07	2245.35
53	18	2hIR	190802	1	dDBD	exp1	2h	3	416.365	2011.01	1553.08
53	19	2hIR	190802	1	dDBD	exp1	2h	20	718.025	2949.72	1898.97
53	20	2hIR	190802	1	dDBD	exp1	2h	15	859.541	3313.7	271.354
53	21	2hIR	190802	1	dDBD	exp1	2h	14	601.358	2619.42	1902.85
53	22	2hIR	190802	1	dDBD	exp1	2h	8	564.642	2611.56	2258.38
53	23	2hIR	190802	1	dDBD	exp1	2h	17	371.338	1926.58	1793.77
54	1	noIR	190802	1	dDBD	exp1	noIR	5	499.567	1404.77	556.766
54	2	noIR	190802	1	dDBD	exp1	noIR	8	528.75	1997.84	1412.25
54	3	noIR	190802	1	dDBD	exp1	noIR	3	419.061	1471.76	633.731
54	4	noIR	190802	1	dDBD	exp1	noIR	16	485.507	2125.56	995.132
54	5	noIR	190802	1	dDBD	exp1	noIR	21	598.228	2550.12	780.695
54	6	noIR	190802	1	dDBD	exp1	noIR	7	323.527	1491.55	812.72
54	7	noIR	190802	1	dDBD	exp1	noIR	2	447.713	1598.27	538.251
54	8	noIR	190802	1	dDBD	exp1	noIR	21	799.236	3546.19	1307.26
54	9	noIR	190802	1	dDBD	exp1	noIR	3	589.952	2673.16	153.625
54	10	noIR	190802	1	dDBD	exp1	noIR	17	677.699	2063.16	417.737
54	11	noIR	190802	1	dDBD	exp1	noIR	10	767.908	3197.53	155.029
54	12	noIR	190802	1	dDBD	exp1	noIR	4	369.962	2810.32	299.632
54	13	noIR	190802	1	dDBD	exp1	noIR	13	497.458	1948.37	1020.44
54	14	noIR	190802	1	dDBD	exp1	noIR	18	625.442	2539.68	726.024
54	15	noIR	190802	1	dDBD	exp1	noIR	0	788.832	2592.65	200.527
54	16	noIR	190802	1	dDBD	exp1	noIR	6	737.97	3208.64	219.301
54	17	noIR	190802	1	dDBD	exp1	noIR	4	318.901	1665.75	428.971
54	18	noIR	190802	1	dDBD	exp1	noIR	30	698.318	3819.54	952.884
54	19	noIR	190802	1	dDBD	exp1	noIR	22	569.481	2813.9	872.417
54	20	noIR	190802	1	dDBD	exp1	noIR	11	391.25	1753.21	849.496
54	21	noIR	190802	1	dDBD	exp1	noIR	26	646.021	2532.32	1200.61
54	22	noIR	190802	1	dDBD	exp1	noIR	9	1041.93	4581.27	775.083
54	23	noIR	190802	1	dDBD	exp1	noIR	9	615.61	2583.21	705.746
54	24	noIR	190802	1	dDBD	exp1	noIR	4	522.705	2477.19	620.837
54	25	noIR	190802	1	dDBD	exp1	noIR	11	750.748	2826.16	795.388
54	26	noIR	190802	1	dDBD	exp1	noIR	16	1129.34	5158.15	1384.36
54	27	noIR	190802	1	dDBD	exp1	noIR	4	747.855	3382.95	198.722
54	28	noIR	190802	1	dDBD	exp1	noIR	0	283.922	1375.84	188.069
55	1	2hIR	190802	1	dDBDdCTD	exp1	2h	6	421.844	1096.24	1108.79
55	2	2hIR	190802	1	dDBDdCTD	exp1	2h	4	494.639	1090.63	658.504
55	3	2hIR	190802	1	dDBDdCTD	exp1	2h	28	802.974	2073.15	983.664
55	4	2hIR	190802	1	dDBDdCTD	exp1	2h	17	776.117	1778.16	769.203
55	5	2hIR	190802	1	dDBDdCTD	exp1	2h	14	832.319	1660.84	217.27
55	6	2hIR	190802	1	dDBDdCTD	exp1	2h	11	518.606	1299.94	956.273
55	7	2hIR	190802	1	dDBDdCTD	exp1	2h	5	608.337	1895.23	1313.15
55	8	2hIR	190802	1	dDBDdCTD	exp1	2h	18	853.387	1631.16	729.986
55	9	2hIR	190802	1	dDBDdCTD	exp1	2h	19	695.84	2314.83	1329.44
55	10	2hIR	190802	1	dDBDdCTD	exp1	2h	21	1238.59	2075.34	254.605
55	11	2hIR	190802	1	dDBDdCTD	exp1	2h	18	644.798	2050.73	1029.04
55	12	2hIR	190802	1	dDBDdCTD	exp1	2h	28	790.763	1767.66	570.788
55	13	2hIR	190802	1	dDBDdCTD	exp1	2h	12	668.988	1927.94	1177.76
55	14	2hIR	190802	1	dDBDdCTD	exp1	2h	24	634.282	1671.22	1090.55
55	15	2hIR	190802	1	dDBDdCTD	exp1	2h	10	736.831	2380.47	1453.81
55	16	2hIR	190802	1	dDBDdCTD	exp1	2h	11	841.3	2328.46	563.256
55	17	2hIR	190802	1	dDBDdCTD	exp1	2h	14	971.06	2357.98	272.575
55	18	2hIR	190802	1	dDBDdCTD	exp1	2h	22	741.289	1981.05	1111.95
55	19	2hIR	190802	1	dDBDdCTD	exp1	2h	11	833.532	1789.2	205.804
55	20	2hIR	190802	1	dDBDdCTD	exp1	2h	12	786.857	2751.67	1587.67
55	21	2hIR	190802	1	dDBDdCTD	exp1	2h	11	914.961	2446.56	238.422
55	22	2hIR	190802	1	dDBDdCTD	exp1	2h	11	731.054	2423.83	1350.9
55	23	2hIR	190802	1	dDBDdCTD	exp1	2h	29	759.716	1592.92	1048.16
55	24	2hIR	190802	1	dDBDdCTD	exp1	2h	22	975.367	2265.91	1623.6
55	25	2hIR	190802	1	dDBDdCTD	exp1	2h	30	1104.09	2795.09	224.566
55	26	2hIR	190802	1	dDBDdCTD	exp1	2h	22	1040.9	2610.4	501.436
55	27	2hIR	190802	1	dDBDdCTD	exp1	2h	2	328.886	926.823	609.947
55	28	2hIR	190802	1	dDBDdCTD	exp1	2h	17	727.537	1948.43	1976.41
55	29	2hIR	190802	1	dDBDdCTD	exp1	2h	25	895.3	2577.19	1270.03
55	30	2hIR	190802	1	dDBDdCTD	exp1	2h	0	104.741	329.693	183.575
55	31	2hIR	190802	1	dDBDdCTD	exp1	2h	10	544.35	1511.94	1520.71
55	32	2hIR	190802	1	dDBDdCTD	exp1	2h	20	639.189	1629.27	1547.69
56	1	noIR	190802	1	dDBDdCTD	exp1	noIR	7	1487.92	1739.07	1013.67
56	2	noIR	190802	1	dDBDdCTD	exp1	noIR	2	1133.14	1549.09	1048.77
56	3	noIR	190802	1	dDBDdCTD	exp1	noIR	0	662.923	936.451	81.0918
56	4	noIR	190802	1	dDBDdCTD	exp1	noIR	13	1503.37	2325.69	206.59
56	5	noIR	190802	1	dDBDdCTD	exp1	noIR	17	1526.78	2364.63	1127.21
56	6	noIR	190802	1	dDBDdCTD	exp1	noIR	1	1328.25	1512.31	1039.28
56	7	noIR	190802	1	dDBDdCTD	exp1	noIR	5	1736.44	3396.08	994.46
56	8	noIR	190802	1	dDBDdCTD	exp1	noIR	12	1368.57	2344.54	1173.19
56	9	noIR	190802	1	dDBDdCTD	exp1	noIR	1	1237.7	2153.74	833.194
56	10	noIR	190802	1	dDBDdCTD	exp1	noIR	7	1714.06	2616.24	213.222
56	11	noIR	190802	1	dDBDdCTD	exp1	noIR	6	1769.97	3334.07	773.604
56	12	noIR	190802	1	dDBDdCTD	exp1	noIR	6	1030.92	1753.42	783.605
56	13	noIR	190802	1	dDBDdCTD	exp1	noIR	0	365.872	645.094	48.6781
56	14	noIR	190802	1	dDBDdCTD	exp1	noIR	15	1423.35	2728.75	1294.14
56	15	noIR	190802	1	dDBDdCTD	exp1	noIR	6	1396.19	2133.03	1133.64
56	16	noIR	190802	1	dDBDdCTD	exp1	noIR	3	1108	2149.31	827.772
56	17	noIR	190802	1	dDBDdCTD	exp1	noIR	9	1277.68	2427.18	1165.55
56	18	noIR	190802	1	dDBDdCTD	exp1	noIR	0	594.624	1012.46	98.5132
56	19	noIR	190802	1	dDBDdCTD	exp1	noIR	6	1346.57	2027.14	1118.27
56	20	noIR	190802	1	dDBDdCTD	exp1	noIR	5	1088.27	2099.86	701.089
56	21	noIR	190802	1	dDBDdCTD	exp1	noIR	15	1817.63	3281.85	208.763
56	22	noIR	190802	1	dDBDdCTD	exp1	noIR	11	1751.55	3398.17	217.124
56	23	noIR	190802	1	dDBDdCTD	exp1	noIR	0	1635.19	3357.77	209.708
56	24	noIR	190802	1	dDBDdCTD	exp1	noIR	7	1371.65	2355.57	1245.15
56	25	noIR	190802	1	dDBDdCTD	exp1	noIR	7	1524.01	3167.39	803.791
56	26	noIR	190802	1	dDBDdCTD	exp1	noIR	8	1564.22	2799.97	1440.92
56	27	noIR	190802	1	dDBDdCTD	exp1	noIR	0	1579.53	3144.85	199.515
56	28	noIR	190802	1	dDBDdCTD	exp1	noIR	7	1251.71	2358.35	1165.96
56	29	noIR	190802	1	dDBDdCTD	exp1	noIR	3	1342.32	2106.18	965.749
56	30	noIR	190802	1	dDBDdCTD	exp1	noIR	23	1926.93	3465.26	217.074
56	31	noIR	190802	1	dDBDdCTD	exp1	noIR	10	867.665	1209.36	638.014
56	32	noIR	190802	1	dDBDdCTD	exp1	noIR	11	1474.46	2639.67	1302.22
56	33	noIR	190802	1	dDBDdCTD	exp1	noIR	11	1117.24	1425.11	775.442
56	34	noIR	190802	1	dDBDdCTD	exp1	noIR	8	1577.25	2915.61	177.927
56	35	noIR	190802	1	dDBDdCTD	exp1	noIR	14	1950.98	3115.28	1346.36
57	1	2hIR	190802	2	WT	exp1	2h	1	1379.89	2584.9	241.174
57	2	2hIR	190802	2	WT	exp1	2h	28	993.355	1995.33	928.547
57	3	2hIR	190802	2	WT	exp1	2h	7	653.293	1258.51	499.349
57	4	2hIR	190802	2	WT	exp1	2h	26	1159.87	1989.86	218.77
57	5	2hIR	190802	2	WT	exp1	2h	21	1005.01	2388.97	675.463
57	6	2hIR	190802	2	WT	exp1	2h	25	947.543	2729.85	188.245
57	7	2hIR	190802	2	WT	exp1	2h	11	484.689	1490.24	531.407
57	8	2hIR	190802	2	WT	exp1	2h	26	962.817	2223.76	386.317
57	9	2hIR	190802	2	WT	exp1	2h	22	755.304	2054.6	842.659
57	10	2hIR	190802	2	WT	exp1	2h	22	1190.42	2861.3	267.506
57	11	2hIR	190802	2	WT	exp1	2h	33	1061.25	3086.83	253.745
57	12	2hIR	190802	2	WT	exp1	2h	10	1147.01	3779.61	250.775
57	13	2hIR	190802	2	WT	exp1	2h	12	622.063	1319.29	789.607
57	14	2hIR	190802	2	WT	exp1	2h	17	644.563	2329.5	785.56
57	15	2hIR	190802	2	WT	exp1	2h	26	1104.06	2468.39	650.02
57	16	2hIR	190802	2	WT	exp1	2h	7	596.966	1048.83	825.826
57	17	2hIR	190802	2	WT	exp1	2h	37	1494.25	3318.06	269.626
57	18	2hIR	190802	2	WT	exp1	2h	27	1222.41	3428.62	951.232
57	19	2hIR	190802	2	WT	exp1	2h	29	1270.6	3976.56	834.226
57	20	2hIR	190802	2	WT	exp1	2h	35	1229.35	2816.38	245.363
57	21	2hIR	190802	2	WT	exp1	2h	20	1140.9	3084.68	452.242
57	22	2hIR	190802	2	WT	exp1	2h	37	1130.7	3732.01	520.396
57	23	2hIR	190802	2	WT	exp1	2h	24	721.982	1974.54	199.28
57	24	2hIR	190802	2	WT	exp1	2h	6	1317.48	5256.34	610.67
57	25	2hIR	190802	2	WT	exp1	2h	13	515.88	1454.08	144.955
57	26	2hIR	190802	2	WT	exp1	2h	11	625.785	2495.15	883.119
57	27	2hIR	190802	2	WT	exp1	2h	6	454.707	2274.59	685.586
58	1	noIR	190802	2	WT	exp1	noIR	11	965.357	2797.14	298.916
58	2	noIR	190802	2	WT	exp1	noIR	21	806.337	2052.88	643.822
58	3	noIR	190802	2	WT	exp1	noIR	14	895.326	1957.75	778.328
58	4	noIR	190802	2	WT	exp1	noIR	3	1253.24	3206.06	310.546
58	5	noIR	190802	2	WT	exp1	noIR	12	1117.82	2999.02	309.175
58	6	noIR	190802	2	WT	exp1	noIR	17	696.522	1804.07	492.25
58	7	noIR	190802	2	WT	exp1	noIR	9	624.164	1767.24	796.08
58	8	noIR	190802	2	WT	exp1	noIR	20	720.866	2205.32	765.665
58	9	noIR	190802	2	WT	exp1	noIR	11	945.378	3463.16	758.197
58	10	noIR	190802	2	WT	exp1	noIR	11	950.5	2291.1	921.145
[truncated: 3,760 more rows]

## Sheet: RAD51_Source data
ImageNumber	ObjectNumber	Metadata_condition	Metadata_date	Metadata_position	Metadata_protein	experiment	condition	Children_RAD51_Count	Intensity_IntegratedIntensity_DAPI	Intensity_IntegratedIntensity_EdU	Intensity_IntegratedIntensity_RAD51
1	1	2hIR	181112	1	WT	exp1	2h	58	3251.05	1490.66	739.022
1	2	2hIR	181112	1	WT	exp1	2h	0	1793.55	218.78	133.612
1	3	2hIR	181112	1	WT	exp1	2h	24	1284.93	1153.66	256.755
1	4	2hIR	181112	1	WT	exp1	2h	29	1359.28	633.093	363.746
1	5	2hIR	181112	1	WT	exp1	2h	5	1889.39	219.492	188.45
1	6	2hIR	181112	1	WT	exp1	2h	27	1328.86	910.024	262.824
1	7	2hIR	181112	1	WT	exp1	2h	31	1416.66	687.131	349.229
1	8	2hIR	181112	1	WT	exp1	2h	17	1563.45	338.218	297.112
1	9	2hIR	181112	1	WT	exp1	2h	2	1563.37	711.952	135.172
1	10	2hIR	181112	1	WT	exp1	2h	51	1246.05	826.048	410.387
1	11	2hIR	181112	1	WT	exp1	2h	31	1439.3	986.679	296.491
1	12	2hIR	181112	1	WT	exp1	2h	27	3364.47	426.685	486.479
1	13	2hIR	181112	1	WT	exp1	2h	16	2164.23	257.455	253.914
1	14	2hIR	181112	1	WT	exp1	2h	62	2859.71	1109.02	622.841
1	15	2hIR	181112	1	WT	exp1	2h	29	1966.53	691.904	303.759
1	16	2hIR	181112	1	WT	exp1	2h	2	1571.37	511.63	119.911
1	17	2hIR	181112	1	WT	exp1	2h	0	1104.04	708.346	89.4872
1	18	2hIR	181112	1	WT	exp1	2h	46	2427.98	252.521	501.977
1	19	2hIR	181112	1	WT	exp1	2h	48	2076.12	812.699	473.045
1	20	2hIR	181112	1	WT	exp1	2h	38	2088.75	247.941	430.84
1	21	2hIR	181112	1	WT	exp1	2h	26	1545.46	894.067	278.475
1	22	2hIR	181112	1	WT	exp1	2h	0	2321.52	270.854	228.527
1	23	2hIR	181112	1	WT	exp1	2h	37	2092.95	965.868	343.958
1	24	2hIR	181112	1	WT	exp1	2h	17	2254.66	239.921	268.422
1	25	2hIR	181112	1	WT	exp1	2h	3	923.206	480.175	95.5735
1	26	2hIR	181112	1	WT	exp1	2h	1	880.05	93.98	65.6334
1	27	2hIR	181112	1	WT	exp1	2h	10	2428.05	256.284	224.359
1	28	2hIR	181112	1	WT	exp1	2h	35	2836.56	1074.4	463.437
1	29	2hIR	181112	1	WT	exp1	2h	2	1516.39	664.884	124.893
1	30	2hIR	181112	1	WT	exp1	2h	29	1719.45	880.279	289.073
1	31	2hIR	181112	1	WT	exp1	2h	33	1745.81	890.651	331.913
1	32	2hIR	181112	1	WT	exp1	2h	47	2510.06	256.127	455.963
1	33	2hIR	181112	1	WT	exp1	2h	18	1676.97	731.372	182.418
1	34	2hIR	181112	1	WT	exp1	2h	21	2168.19	779.942	285.952
1	35	2hIR	181112	1	WT	exp1	2h	43	2000.28	723.995	436.034
1	36	2hIR	181112	1	WT	exp1	2h	16	2494	1404.54	293.814
1	37	2hIR	181112	1	WT	exp1	2h	10	1544.93	726.904	160.346
1	38	2hIR	181112	1	WT	exp1	2h	32	1757.11	1245.3	268.772
1	39	2hIR	181112	1	WT	exp1	2h	40	2117.15	917.424	367.565
1	40	2hIR	181112	1	WT	exp1	2h	5	1470.85	240.646	134.486
1	41	2hIR	181112	1	WT	exp1	2h	47	2514.93	485.107	442.698
1	42	2hIR	181112	1	WT	exp1	2h	20	2438.39	272.798	296.56
1	43	2hIR	181112	1	WT	exp1	2h	34	3602.28	1065.51	403.485
1	44	2hIR	181112	1	WT	exp1	2h	40	2244.05	256.199	404.2
1	45	2hIR	181112	1	WT	exp1	2h	13	2038.45	1170.21	188.067
1	46	2hIR	181112	1	WT	exp1	2h	24	1735.1	1065.66	249.38
1	47	2hIR	181112	1	WT	exp1	2h	25	3245.1	1291.79	340.704
1	48	2hIR	181112	1	WT	exp1	2h	2	2731.97	309.882	234.909
1	49	2hIR	181112	1	WT	exp1	2h	35	2831.37	477.89	392.29
1	50	2hIR	181112	1	WT	exp1	2h	49	4459.15	820.651	562.08
1	51	2hIR	181112	1	WT	exp1	2h	40	1869.37	1427.24	396.636
1	52	2hIR	181112	1	WT	exp1	2h	38	1904.75	674.169	361.474
1	53	2hIR	181112	1	WT	exp1	2h	5	2684.63	309.082	253.313
1	54	2hIR	181112	1	WT	exp1	2h	6	766.066	431.578	85.0297
2	1	8hIR	181112	1	WT	exp1	8h	21	1922.84	2650.15	365.458
2	2	8hIR	181112	1	WT	exp1	8h	0	1352.5	1053.24	132.054
2	3	8hIR	181112	1	WT	exp1	8h	24	1739.3	1576.72	441.631
2	4	8hIR	181112	1	WT	exp1	8h	45	2995.21	2783.64	791.726
2	5	8hIR	181112	1	WT	exp1	8h	0	1477.91	238.88	113.388
2	6	8hIR	181112	1	WT	exp1	8h	0	1379.92	249.921	105.811
2	7	8hIR	181112	1	WT	exp1	8h	0	1831.16	342.803	154.297
2	8	8hIR	181112	1	WT	exp1	8h	0	1468.69	174.135	94.2287
2	9	8hIR	181112	1	WT	exp1	8h	17	2919.24	387.203	466.811
2	10	8hIR	181112	1	WT	exp1	8h	34	2845.12	2838.53	494.906
2	11	8hIR	181112	1	WT	exp1	8h	9	1007.18	166.749	134.387
2	12	8hIR	181112	1	WT	exp1	8h	5	3172.03	347.653	225.35
2	13	8hIR	181112	1	WT	exp1	8h	5	909.933	148.999	102.347
2	14	8hIR	181112	1	WT	exp1	8h	8	2915.11	396.168	358.298
2	15	8hIR	181112	1	WT	exp1	8h	0	1767.06	255.982	122.429
2	16	8hIR	181112	1	WT	exp1	8h	0	3033.34	291.647	161.209
2	17	8hIR	181112	1	WT	exp1	8h	2	3773.94	399.169	291.807
2	18	8hIR	181112	1	WT	exp1	8h	36	2156.35	6777.07	323.853
2	19	8hIR	181112	1	WT	exp1	8h	12	4029.03	417.649	432.094
2	20	8hIR	181112	1	WT	exp1	8h	24	1973.75	6826.12	285.201
2	21	8hIR	181112	1	WT	exp1	8h	23	3706.45	491.321	540.468
2	22	8hIR	181112	1	WT	exp1	8h	15	6440.06	617.609	549.198
2	23	8hIR	181112	1	WT	exp1	8h	24	1956.76	7040.49	274.45
2	24	8hIR	181112	1	WT	exp1	8h	43	2591.61	6727.46	364.3
2	25	8hIR	181112	1	WT	exp1	8h	47	2765.61	6728.57	381.626
2	26	8hIR	181112	1	WT	exp1	8h	22	4078.46	433.899	548.827
2	27	8hIR	181112	1	WT	exp1	8h	47	2596.3	7264.49	385.981
2	28	8hIR	181112	1	WT	exp1	8h	5	3996.52	434.542	314.212
2	29	8hIR	181112	1	WT	exp1	8h	44	2319.55	7577.75	327.654
2	30	8hIR	181112	1	WT	exp1	8h	42	2642.32	7690.93	405.233
2	31	8hIR	181112	1	WT	exp1	8h	29	3787.65	1964.45	464.39
2	32	8hIR	181112	1	WT	exp1	8h	0	2050.4	200.02	113.146
2	33	8hIR	181112	1	WT	exp1	8h	20	3847.18	610.825	481.567
2	34	8hIR	181112	1	WT	exp1	8h	1	2108.83	203.812	121.427
2	35	8hIR	181112	1	WT	exp1	8h	0	3459.12	336.488	190.234
2	36	8hIR	181112	1	WT	exp1	8h	0	1027.38	119.863	56.1622
2	37	8hIR	181112	1	WT	exp1	8h	0	1114.99	117.032	60.1472
2	38	8hIR	181112	1	WT	exp1	8h	0	544.638	51.1615	28.0003
2	39	8hIR	181112	1	WT	exp1	8h	0	570.7	79.3702	34.7989
3	1	2hIR	181112	1	dCTD	exp1	2h	27	1666.95	752.237	293.648
3	2	2hIR	181112	1	dCTD	exp1	2h	10	883.036	343.215	111.954
3	3	2hIR	181112	1	dCTD	exp1	2h	27	1384.25	1133.51	229.126
3	4	2hIR	181112	1	dCTD	exp1	2h	22	2578.05	426.146	285.285
3	5	2hIR	181112	1	dCTD	exp1	2h	25	2330.92	1277.35	255.657
3	6	2hIR	181112	1	dCTD	exp1	2h	30	1744.8	1004.08	261.826
3	7	2hIR	181112	1	dCTD	exp1	2h	33	1692.51	1114	329.152
3	8	2hIR	181112	1	dCTD	exp1	2h	15	2116.62	1322.05	178.72
3	9	2hIR	181112	1	dCTD	exp1	2h	41	2029.19	1031.58	433.881
3	10	2hIR	181112	1	dCTD	exp1	2h	4	1347.02	352.695	123.375
3	11	2hIR	181112	1	dCTD	exp1	2h	56	6393.9	2032.58	586.158
3	12	2hIR	181112	1	dCTD	exp1	2h	28	2764.48	842.318	290.522
3	13	2hIR	181112	1	dCTD	exp1	2h	27	2258.79	1261.43	284.574
3	14	2hIR	181112	1	dCTD	exp1	2h	0	3282.3	315.987	189.572
3	15	2hIR	181112	1	dCTD	exp1	2h	38	3558.48	461.688	371.719
3	16	2hIR	181112	1	dCTD	exp1	2h	37	2078.38	1309.31	323.555
3	17	2hIR	181112	1	dCTD	exp1	2h	12	2252.18	936.936	176.608
3	18	2hIR	181112	1	dCTD	exp1	2h	30	2391.38	1465.93	298.774
3	19	2hIR	181112	1	dCTD	exp1	2h	2	1388.91	113.467	80.8601
3	20	2hIR	181112	1	dCTD	exp1	2h	2	1550.75	676.893	131.455
3	21	2hIR	181112	1	dCTD	exp1	2h	1	830.606	64.4995	44.492
3	22	2hIR	181112	1	dCTD	exp1	2h	35	3688.47	1579.15	380.495
3	23	2hIR	181112	1	dCTD	exp1	2h	36	2287.27	812.158	286.803
3	24	2hIR	181112	1	dCTD	exp1	2h	32	1996.04	866.436	309.52
3	25	2hIR	181112	1	dCTD	exp1	2h	20	997.815	367.672	169.58
3	26	2hIR	181112	1	dCTD	exp1	2h	5	1703.89	760.741	138.836
3	27	2hIR	181112	1	dCTD	exp1	2h	36	3889.27	879.247	478.369
3	28	2hIR	181112	1	dCTD	exp1	2h	39	2447.49	832.42	356.827
3	29	2hIR	181112	1	dCTD	exp1	2h	0	2166.58	180.32	112.256
3	30	2hIR	181112	1	dCTD	exp1	2h	39	2843.79	939.925	303.538
3	31	2hIR	181112	1	dCTD	exp1	2h	48	2161.36	897.419	399.432
3	32	2hIR	181112	1	dCTD	exp1	2h	0	1671.26	154.849	90.2912
3	33	2hIR	181112	1	dCTD	exp1	2h	26	3320.74	365.748	318.246
3	34	2hIR	181112	1	dCTD	exp1	2h	51	2357.89	732.044	388.094
3	35	2hIR	181112	1	dCTD	exp1	2h	36	2405.73	839.511	314.692
4	1	8hIR	181112	1	dCTD	exp1	8h	3	553.912	158.509	63.9504
4	2	8hIR	181112	1	dCTD	exp1	8h	15	2967.22	406.145	354.213
4	3	8hIR	181112	1	dCTD	exp1	8h	0	905.919	78.446	58.1141
4	4	8hIR	181112	1	dCTD	exp1	8h	1	781.482	89.5231	47.5253
4	5	8hIR	181112	1	dCTD	exp1	8h	24	2085.35	1348.34	245.064
4	6	8hIR	181112	1	dCTD	exp1	8h	3	2215.41	259.132	206.217
4	7	8hIR	181112	1	dCTD	exp1	8h	0	3019.17	330.37	212.777
4	8	8hIR	181112	1	dCTD	exp1	8h	23	5243.05	817.191	433.056
4	9	8hIR	181112	1	dCTD	exp1	8h	0	2816.63	257.866	177.52
4	10	8hIR	181112	1	dCTD	exp1	8h	0	1443.48	106.714	73.0321
4	11	8hIR	181112	1	dCTD	exp1	8h	18	2088.25	1427.1	248.925
4	12	8hIR	181112	1	dCTD	exp1	8h	27	2718.75	864.226	341.93
4	13	8hIR	181112	1	dCTD	exp1	8h	10	651.631	851.666	83.6102
4	14	8hIR	181112	1	dCTD	exp1	8h	82	4959.22	3280.37	628.457
4	15	8hIR	181112	1	dCTD	exp1	8h	0	1474.6	114.003	75.3249
4	16	8hIR	181112	1	dCTD	exp1	8h	0	1979.94	540.467	126.223
4	17	8hIR	181112	1	dCTD	exp1	8h	41	6387.28	2069.5	483.075
4	18	8hIR	181112	1	dCTD	exp1	8h	13	1059.36	1160.72	127.955
4	19	8hIR	181112	1	dCTD	exp1	8h	21	2971.27	424.014	272.947
4	20	8hIR	181112	1	dCTD	exp1	8h	1	3863.68	355.524	239.855
4	21	8hIR	181112	1	dCTD	exp1	8h	37	4638.93	1300.3	374.79
4	22	8hIR	181112	1	dCTD	exp1	8h	31	2669.01	2184.65	277.236
4	23	8hIR	181112	1	dCTD	exp1	8h	27	3743.54	969.131	302.054
4	24	8hIR	181112	1	dCTD	exp1	8h	6	715.349	500.912	63.2475
4	25	8hIR	181112	1	dCTD	exp1	8h	39	2572.93	1789.21	290.5
4	26	8hIR	181112	1	dCTD	exp1	8h	0	3918.81	311.742	210.437
4	27	8hIR	181112	1	dCTD	exp1	8h	12	1210.59	887.572	106.524
4	28	8hIR	181112	1	dCTD	exp1	8h	2	2268	196.239	140.903
4	29	8hIR	181112	1	dCTD	exp1	8h	15	3107.89	309.41	253.532
4	30	8hIR	181112	1	dCTD	exp1	8h	21	3525.61	309.84	297.34
4	31	8hIR	181112	1	dCTD	exp1	8h	0	5665.3	490.694	321.105
4	32	8hIR	181112	1	dCTD	exp1	8h	7	3250.51	255.424	214.04
4	33	8hIR	181112	1	dCTD	exp1	8h	14	3234.17	270.81	230.18
4	34	8hIR	181112	1	dCTD	exp1	8h	36	3170.11	660.541	390.387
4	35	8hIR	181112	1	dCTD	exp1	8h	0	1306.46	77.0074	55.7966
4	36	8hIR	181112	1	dCTD	exp1	8h	0	890.663	51.2277	35.703
4	37	8hIR	181112	1	dCTD	exp1	8h	17	1784.93	297.266	213.93
4	38	8hIR	181112	1	dCTD	exp1	8h	3	3223.86	283.195	227.935
5	1	2hIR	181112	1	dDBD	exp1	2h	4	959.411	624.038	107.057
5	2	2hIR	181112	1	dDBD	exp1	2h	26	2047.81	292.774	267.536
5	3	2hIR	181112	1	dDBD	exp1	2h	28	1810.37	541.978	252.506
5	4	2hIR	181112	1	dDBD	exp1	2h	7	1025.96	1240.43	131.231
5	5	2hIR	181112	1	dDBD	exp1	2h	3	1184.91	852.611	139.495
5	6	2hIR	181112	1	dDBD	exp1	2h	7	1110.61	1207.62	138.232
5	7	2hIR	181112	1	dDBD	exp1	2h	28	1924.73	587.043	277.281
5	8	2hIR	181112	1	dDBD	exp1	2h	39	1681.29	1190.1	293.227
5	9	2hIR	181112	1	dDBD	exp1	2h	10	965.995	1160.77	142.092
5	10	2hIR	181112	1	dDBD	exp1	2h	37	1399.36	1533.73	284.483
5	11	2hIR	181112	1	dDBD	exp1	2h	35	2402.88	363.105	290.386
5	12	2hIR	181112	1	dDBD	exp1	2h	33	2526.89	271.529	308.091
5	13	2hIR	181112	1	dDBD	exp1	2h	7	1157.72	1138.82	135.113
5	14	2hIR	181112	1	dDBD	exp1	2h	24	2469.15	294.008	291.171
5	15	2hIR	181112	1	dDBD	exp1	2h	35	1498.67	1760.87	257.011
5	16	2hIR	181112	1	dDBD	exp1	2h	41	2668.68	278.327	354.863
5	17	2hIR	181112	1	dDBD	exp1	2h	44	2231.87	1314.1	335.506
5	18	2hIR	181112	1	dDBD	exp1	2h	24	1710.31	1657.8	217.261
5	19	2hIR	181112	1	dDBD	exp1	2h	44	1945.88	971.766	361.871
5	20	2hIR	181112	1	dDBD	exp1	2h	27	1592.4	1784.29	254.854
5	21	2hIR	181112	1	dDBD	exp1	2h	29	1774.01	1118.44	253.49
5	22	2hIR	181112	1	dDBD	exp1	2h	33	2344.4	1373.65	280.815
5	23	2hIR	181112	1	dDBD	exp1	2h	25	1590.86	1123.75	234.167
5	24	2hIR	181112	1	dDBD	exp1	2h	36	2415.29	1398.02	286.507
5	25	2hIR	181112	1	dDBD	exp1	2h	27	1536.87	1706.79	242.476
5	26	2hIR	181112	1	dDBD	exp1	2h	41	1989.3	1817.81	323.285
5	27	2hIR	181112	1	dDBD	exp1	2h	36	2156.09	1287.69	265.013
5	28	2hIR	181112	1	dDBD	exp1	2h	38	1799.52	2038.98	297.216
5	29	2hIR	181112	1	dDBD	exp1	2h	27	3198.5	326.999	346.292
5	30	2hIR	181112	1	dDBD	exp1	2h	42	2100.73	1397.77	338.849
5	31	2hIR	181112	1	dDBD	exp1	2h	33	1488.04	1177.58	269.328
5	32	2hIR	181112	1	dDBD	exp1	2h	41	2434.73	904.144	355.716
5	33	2hIR	181112	1	dDBD	exp1	2h	49	2817.34	1325.98	363.615
5	34	2hIR	181112	1	dDBD	exp1	2h	24	2456.69	334.707	305.95
5	35	2hIR	181112	1	dDBD	exp1	2h	44	1870.45	1074.11	359.604
5	36	2hIR	181112	1	dDBD	exp1	2h	36	1943.37	694.365	284.687
5	37	2hIR	181112	1	dDBD	exp1	2h	35	1893.99	1394.95	344.714
5	38	2hIR	181112	1	dDBD	exp1	2h	44	2774.16	867.137	360.37
5	39	2hIR	181112	1	dDBD	exp1	2h	1	1280.13	774.892	119.845
6	1	8hIR	181112	1	dDBD	exp1	8h	14	2579.1	391.737	293.424
6	2	8hIR	181112	1	dDBD	exp1	8h	13	2779.43	325.891	257.895
6	3	8hIR	181112	1	dDBD	exp1	8h	9	3086.48	415.013	256.659
6	4	8hIR	181112	1	dDBD	exp1	8h	12	2902.86	358.051	269.841
6	5	8hIR	181112	1	dDBD	exp1	8h	28	2725.31	970.32	336.735
6	6	8hIR	181112	1	dDBD	exp1	8h	2	3189.72	387.567	256.362
6	7	8hIR	181112	1	dDBD	exp1	8h	44	2830.92	1302.51	379.649
6	8	8hIR	181112	1	dDBD	exp1	8h	30	2491.09	1122.35	270.85
6	9	8hIR	181112	1	dDBD	exp1	8h	26	2861.93	434.216	357.43
6	10	8hIR	181112	1	dDBD	exp1	8h	36	2809.11	759.538	299.278
6	11	8hIR	181112	1	dDBD	exp1	8h	32	3013.41	881.067	371.951
6	12	8hIR	181112	1	dDBD	exp1	8h	29	3654.11	385.045	330.029
6	13	8hIR	181112	1	dDBD	exp1	8h	14	3332.88	347.525	239.933
6	14	8hIR	181112	1	dDBD	exp1	8h	18	4361.07	493.044	349.91
6	15	8hIR	181112	1	dDBD	exp1	8h	44	3689.06	420.03	433.633
6	16	8hIR	181112	1	dDBD	exp1	8h	7	3694.2	381.125	291.392
6	17	8hIR	181112	1	dDBD	exp1	8h	6	3289.64	313.835	218.73
6	18	8hIR	181112	1	dDBD	exp1	8h	0	2249.4	159.67	95.4008
6	19	8hIR	181112	1	dDBD	exp1	8h	0	771.535	94.7765	49.4376
6	20	8hIR	181112	1	dDBD	exp1	8h	53	3670.32	697.03	403.444
6	21	8hIR	181112	1	dDBD	exp1	8h	38	3826.49	318.48	346.315
6	22	8hIR	181112	1	dDBD	exp1	8h	15	4600.69	388.546	331.442
6	23	8hIR	181112	1	dDBD	exp1	8h	10	3956.36	441.905	303.174
6	24	8hIR	181112	1	dDBD	exp1	8h	9	3018.72	289.572	228.563
6	25	8hIR	181112	1	dDBD	exp1	8h	11	3826.09	318.107	292.858
6	26	8hIR	181112	1	dDBD	exp1	8h	9	2327.71	213.378	175.397
6	27	8hIR	181112	1	dDBD	exp1	8h	8	4375.28	375.109	272.896
6	28	8hIR	181112	1	dDBD	exp1	8h	22	4452.73	376.53	380.536
6	29	8hIR	181112	1	dDBD	exp1	8h	6	1625.66	133.486	129.718
6	30	8hIR	181112	1	dDBD	exp1	8h	4	1941.76	161.064	128.132
6	31	8hIR	181112	1	dDBD	exp1	8h	13	3466.48	360.797	315.049
6	32	8hIR	181112	1	dDBD	exp1	8h	27	3876.1	378.723	349.392
6	33	8hIR	181112	1	dDBD	exp1	8h	5	3405.35	299.103	213.133
7	1	2hIR	181112	1	dDBDdCTD	exp1	2h	36	1110.71	442.942	256.724
7	2	2hIR	181112	1	dDBDdCTD	exp1	2h	17	1697.51	330.03	301.001
7	3	2hIR	181112	1	dDBDdCTD	exp1	2h	0	2110.96	264.103	230.377
7	4	2hIR	181112	1	dDBDdCTD	exp1	2h	27	1990.84	275.052	252.973
7	5	2hIR	181112	1	dDBDdCTD	exp1	2h	10	2152.3	256.018	212.445
7	6	2hIR	181112	1	dDBDdCTD	exp1	2h	52	1716.9	745.507	344.086
7	7	2hIR	181112	1	dDBDdCTD	exp1	2h	33	1542.8	638.663	259.685
7	8	2hIR	181112	1	dDBDdCTD	exp1	2h	34	1919.24	314.788	267.584
7	9	2hIR	181112	1	dDBDdCTD	exp1	2h	21	2106.63	287.076	285.721
7	10	2hIR	181112	1	dDBDdCTD	exp1	2h	42	1986.88	423.246	303.014
7	11	2hIR	181112	1	dDBDdCTD	exp1	2h	19	2199.78	260.603	257.372
7	12	2hIR	181112	1	dDBDdCTD	exp1	2h	40	1719.31	656.67	254.47
7	13	2hIR	181112	1	dDBDdCTD	exp1	2h	19	1565.48	231.979	227.878
7	14	2hIR	181112	1	dDBDdCTD	exp1	2h	16	2382.08	305.898	211.059
7	15	2hIR	181112	1	dDBDdCTD	exp1	2h	12	949.32	370.832	138.392
7	16	2hIR	181112	1	dDBDdCTD	exp1	2h	27	2141.78	273.729	262.644
7	17	2hIR	181112	1	dDBDdCTD	exp1	2h	24	2424.82	303.751	238.207
7	18	2hIR	181112	1	dDBDdCTD	exp1	2h	4	641.315	208.132	82.0642
7	19	2hIR	181112	1	dDBDdCTD	exp1	2h	4	2793.38	272.703	245.711
7	20	2hIR	181112	1	dDBDdCTD	exp1	2h	18	2288.32	481.466	303.718
7	21	2hIR	181112	1	dDBDdCTD	exp1	2h	29	2944.62	283.659	276.489
7	22	2hIR	181112	1	dDBDdCTD	exp1	2h	24	1777.29	417.026	240.608
7	23	2hIR	181112	1	dDBDdCTD	exp1	2h	21	2100.61	234.104	247.107
7	24	2hIR	181112	1	dDBDdCTD	exp1	2h	13	3463.06	648.989	382.047
7	25	2hIR	181112	1	dDBDdCTD	exp1	2h	9	1608.39	428.515	159.274
7	26	2hIR	181112	1	dDBDdCTD	exp1	2h	42	2058.82	1037.28	277.751
7	27	2hIR	181112	1	dDBDdCTD	exp1	2h	4	2278.29	272.119	235.098
7	28	2hIR	181112	1	dDBDdCTD	exp1	2h	30	2013.2	454.072	228.711
7	29	2hIR	181112	1	dDBDdCTD	exp1	2h	46	2949.22	290.571	307.013
7	30	2hIR	181112	1	dDBDdCTD	exp1	2h	22	2214.55	247.453	255.128
7	31	2hIR	181112	1	dDBDdCTD	exp1	2h	58	2708.6	779.841	357.256
7	32	2hIR	181112	1	dDBDdCTD	exp1	2h	32	2515.04	453.553	249.39
7	33	2hIR	181112	1	dDBDdCTD	exp1	2h	1	1224.54	153.739	133.193
7	34	2hIR	181112	1	dDBDdCTD	exp1	2h	31	1527.06	265.109	222.639
7	35	2hIR	181112	1	dDBDdCTD	exp1	2h	3	1264.11	203.55	120.74
7	36	2hIR	181112	1	dDBDdCTD	exp1	2h	0	979.108	76.1675	49.1266
7	37	2hIR	181112	1	dDBDdCTD	exp1	2h	16	2977.23	288.458	309.109
7	38	2hIR	181112	1	dDBDdCTD	exp1	2h	0	1058.72	109.005	93.556
7	39	2hIR	181112	1	dDBDdCTD	exp1	2h	10	2987.54	294.558	256.493
7	40	2hIR	181112	1	dDBDdCTD	exp1	2h	1	496.088	156.467	49.9872
7	41	2hIR	181112	1	dDBDdCTD	exp1	2h	30	1302.14	493.311	211.246
7	42	2hIR	181112	1	dDBDdCTD	exp1	2h	31	1947.58	526.887	245.444
7	43	2hIR	181112	1	dDBDdCTD	exp1	2h	20	2376.33	277.6	279.024
7	44	2hIR	181112	1	dDBDdCTD	exp1	2h	46	2346.18	760.925	294.723
7	45	2hIR	181112	1	dDBDdCTD	exp1	2h	40	1560.94	610.697	237.974
7	46	2hIR	181112	1	dDBDdCTD	exp1	2h	34	2780.5	584.938	351.316
7	47	2hIR	181112	1	dDBDdCTD	exp1	2h	27	2470.86	311.959	252.999
7	48	2hIR	181112	1	dDBDdCTD	exp1	2h	27	3094.94	485.662	382.296
7	49	2hIR	181112	1	dDBDdCTD	exp1	2h	49	3035.84	366.051	491.628
8	1	8hIR	181112	1	dDBDdCTD	exp1	8h	1	1602.92	426.23	212.244
8	2	8hIR	181112	1	dDBDdCTD	exp1	8h	28	1487.77	1147.02	183.852
8	3	8hIR	181112	1	dDBDdCTD	exp1	8h	18	4653.62	1927.78	491.603
8	4	8hIR	181112	1	dDBDdCTD	exp1	8h	17	1575.2	269.871	174.131
8	5	8hIR	181112	1	dDBDdCTD	exp1	8h	30	3611.49	558.165	323.378
8	6	8hIR	181112	1	dDBDdCTD	exp1	8h	18	3196.02	509.2	277.24
8	7	8hIR	181112	1	dDBDdCTD	exp1	8h	32	2648.49	1534.57	343.664
8	8	8hIR	181112	1	dDBDdCTD	exp1	8h	0	679.749	95.9343	43.1745
8	9	8hIR	181112	1	dDBDdCTD	exp1	8h	0	1056.83	147.011	63.13
8	10	8hIR	181112	1	dDBDdCTD	exp1	8h	0	2216.22	362.378	182.676
8	11	8hIR	181112	1	dDBDdCTD	exp1	8h	15	2398.28	313.293	210.184
8	12	8hIR	181112	1	dDBDdCTD	exp1	8h	1	2127.04	266.27	141.673
8	13	8hIR	181112	1	dDBDdCTD	exp1	8h	3	2791.15	359.651	194.292
8	14	8hIR	181112	1	dDBDdCTD	exp1	8h	0	1941.47	303.808	144.035
8	15	8hIR	181112	1	dDBDdCTD	exp1	8h	2	2505.07	406.827	205.602
8	16	8hIR	181112	1	dDBDdCTD	exp1	8h	0	2647.65	381.609	168.401
8	17	8hIR	181112	1	dDBDdCTD	exp1	8h	33	2789.29	397.213	289.603
8	18	8hIR	181112	1	dDBDdCTD	exp1	8h	34	2194.48	1549.2	216.765
8	19	8hIR	181112	1	dDBDdCTD	exp1	8h	18	3868.35	471.341	292.341
8	20	8hIR	181112	1	dDBDdCTD	exp1	8h	8	779.437	251.88	83.5243
8	21	8hIR	181112	1	dDBDdCTD	exp1	8h	24	2333.23	331.207	191.32
8	22	8hIR	181112	1	dDBDdCTD	exp1	8h	35	2481.34	957.228	239.758
8	23	8hIR	181112	1	dDBDdCTD	exp1	8h	22	2616.68	372.325	240.961
8	24	8hIR	181112	1	dDBDdCTD	exp1	8h	12	1447	391.825	133.058
8	25	8hIR	181112	1	dDBDdCTD	exp1	8h	20	2234.66	1011.53	190.34
8	26	8hIR	181112	1	dDBDdCTD	exp1	8h	17	2637.46	306.688	198.425
8	27	8hIR	181112	1	dDBDdCTD	exp1	8h	35	3902.05	1928.12	314.86
8	28	8hIR	181112	1	dDBDdCTD	exp1	8h	6	2441.87	335.015	201.66
8	29	8hIR	181112	1	dDBDdCTD	exp1	8h	1	2902.24	485.412	244.341
8	30	8hIR	181112	1	dDBDdCTD	exp1	8h	31	2942.93	1360.89	242.746
8	31	8hIR	181112	1	dDBDdCTD	exp1	8h	21	2681.6	318.433	218.586
8	32	8hIR	181112	1	dDBDdCTD	exp1	8h	41	2182.21	2329.27	310.404
8	33	8hIR	181112	1	dDBDdCTD	exp1	8h	30	2128.7	2832.85	227.782
8	34	8hIR	181112	1	dDBDdCTD	exp1	8h	12	2204.38	273.263	177.786
8	35	8hIR	181112	1	dDBDdCTD	exp1	8h	57	5182.83	2611.43	582.864
8	36	8hIR	181112	1	dDBDdCTD	exp1	8h	1	1518.15	267.917	108.083
8	37	8hIR	181112	1	dDBDdCTD	exp1	8h	15	2646.32	367.837	236.242
8	38	8hIR	181112	1	dDBDdCTD	exp1	8h	36	2854.92	348.993	246.509
8	39	8hIR	181112	1	dDBDdCTD	exp1	8h	35	1866.73	3493.26	181.86
9	1	2hIR	181112	2	WT	exp1	2h	4	963.116	147.589	112.474
9	2	2hIR	181112	2	WT	exp1	2h	36	2302.42	340.001	341.574
9	3	2hIR	181112	2	WT	exp1	2h	14	2232.11	269.187	233.315
9	4	2hIR	181112	2	WT	exp1	2h	2	1403.87	179.428	135.569
9	5	2hIR	181112	2	WT	exp1	2h	16	1811.12	852.614	226.498
9	6	2hIR	181112	2	WT	exp1	2h	48	2029.79	959.906	557.193
9	7	2hIR	181112	2	WT	exp1	2h	59	2080.24	936.225	579.666
9	8	2hIR	181112	2	WT	exp1	2h	18	2259.1	1021.53	259.201
9	9	2hIR	181112	2	WT	exp1	2h	4	2367.43	1430.43	226.273
9	10	2hIR	181112	2	WT	exp1	2h	53	2323.74	936.414	550.999
9	11	2hIR	181112	2	WT	exp1	2h	26	2358.34	261.279	302.875
9	12	2hIR	181112	2	WT	exp1	2h	7	2680.32	1308.09	241.59
9	13	2hIR	181112	2	WT	exp1	2h	26	2626.2	477.115	409.871
9	14	2hIR	181112	2	WT	exp1	2h	64	3772.91	2476.57	639.6
9	15	2hIR	181112	2	WT	exp1	2h	56	3369.66	943.802	578.363
9	16	2hIR	181112	2	WT	exp1	2h	1	945.266	107.797	44.4889
9	17	2hIR	181112	2	WT	exp1	2h	55	3445.68	2056.45	684.087
9	18	2hIR	181112	2	WT	exp1	2h	21	1581.77	942.411	241.346
9	19	2hIR	181112	2	WT	exp1	2h	33	1921.98	427.96	355.425
9	20	2hIR	181112	2	WT	exp1	2h	0	759.328	70.1106	32.0851
9	21	2hIR	181112	2	WT	exp1	2h	64	3379.61	2223.01	725.067
9	22	2hIR	181112	2	WT	exp1	2h	19	1582.57	653.295	231.017
9	23	2hIR	181112	2	WT	exp1	2h	41	2986.11	1611.44	506.759
9	24	2hIR	181112	2	WT	exp1	2h	4	2775.13	268.244	159.955
9	25	2hIR	181112	2	WT	exp1	2h	22	2227.5	789.043	238.487
9	26	2hIR	181112	2	WT	exp1	2h	0	1141.25	146.555	81.7255
9	27	2hIR	181112	2	WT	exp1	2h	0	2177.03	215.749	111.566
9	28	2hIR	181112	2	WT	exp1	2h	26	2927.35	551.482	354.785
9	29	2hIR	181112	2	WT	exp1	2h	1	1596.93	203.65	116.343
9	30	2hIR	181112	2	WT	exp1	2h	35	3425.17	623.43	423.846
9	31	2hIR	181112	2	WT	exp1	2h	22	4042.99	555.728	358.397
9	32	2hIR	181112	2	WT	exp1	2h	2	3120.65	319.87	183.02
9	33	2hIR	181112	2	WT	exp1	2h	43	1821.76	465.495	418.248
9	34	2hIR	181112	2	WT	exp1	2h	1	3928.02	462.662	262.514
9	35	2hIR	181112	2	WT	exp1	2h	40	2317.27	478.09	489.276
9	36	2hIR	181112	2	WT	exp1	2h	46	1997.74	475.22	539.429
9	37	2hIR	181112	2	WT	exp1	2h	22	2998.65	282.231	274.557
9	38	2hIR	181112	2	WT	exp1	2h	7	2246.46	446.534	189.883
10	1	8hIR	181112	2	WT	exp1	8h	42	1261.5	5279.77	257.308
10	2	8hIR	181112	2	WT	exp1	8h	2	1902.9	283.398	176.775
10	3	8hIR	181112	2	WT	exp1	8h	20	1968.14	4473.55	255.343
10	4	8hIR	181112	2	WT	exp1	8h	0	2989.33	385.19	195.392
10	5	8hIR	181112	2	WT	exp1	8h	24	1573.83	1033.33	221.616
10	6	8hIR	181112	2	WT	exp1	8h	21	3544.83	1853.14	412.48
10	7	8hIR	181112	2	WT	exp1	8h	6	3110.52	370.727	271.195
10	8	8hIR	181112	2	WT	exp1	8h	12	1354.41	881.802	248.678
10	9	8hIR	181112	2	WT	exp1	8h	0	892.46	119.599	71.0874
10	10	8hIR	181112	2	WT	exp1	8h	4	1443.55	212.957	154.017
10	11	8hIR	181112	2	WT	exp1	8h	23	2888.54	2133.39	339.518
10	12	8hIR	181112	2	WT	exp1	8h	23	2434.97	1335.24	303.811
10	13	8hIR	181112	2	WT	exp1	8h	31	3094.54	1541.88	348.956
10	14	8hIR	181112	2	WT	exp1	8h	19	1563.67	1302.34	201.735
10	15	8hIR	181112	2	WT	exp1	8h	14	1099.62	942.935	126.54
10	16	8hIR	181112	2	WT	exp1	8h	22	3034.78	409.022	318.657
10	17	8hIR	181112	2	WT	exp1	8h	1	719.403	104.919	59.6501
10	18	8hIR	181112	2	WT	exp1	8h	1	1465.81	300.243	137.323
10	19	8hIR	181112	2	WT	exp1	8h	4	1727.71	288.332	182.329
10	20	8hIR	181112	2	WT	exp1	8h	15	3131	309.094	292.261
10	21	8hIR	181112	2	WT	exp1	8h	0	1232.27	106.213	65.7745
10	22	8hIR	181112	2	WT	exp1	8h	17	1870.4	245.793	190.076
10	23	8hIR	181112	2	WT	exp1	8h	1	4018.04	478.454	243.532
10	24	8hIR	181112	2	WT	exp1	8h	0	1044.86	86.2051	55.8664
10	25	8hIR	181112	2	WT	exp1	8h	13	1429.65	979.452	138.184
10	26	8hIR	181112	2	WT	exp1	8h	16	2262.66	2087.85	250.994
10	27	8hIR	181112	2	WT	exp1	8h	22	3539.74	487.981	409.781
10	28	8hIR	181112	2	WT	exp1	8h	7	1846.23	208.558	169.661
10	29	8hIR	181112	2	WT	exp1	8h	47	3617.93	462.959	426.975
10	30	8hIR	181112	2	WT	exp1	8h	8	3270.08	418.651	300.158
10	31	8hIR	181112	2	WT	exp1	8h	15	4229.04	570.937	404.759
10	32	8hIR	181112	2	WT	exp1	8h	0	1797.94	226.237	124.807
10	33	8hIR	181112	2	WT	exp1	8h	17	3035.78	266.113	280.712
10	34	8hIR	181112	2	WT	exp1	8h	7	3266.62	353.099	229.725
10	35	8hIR	181112	2	WT	exp1	8h	0	2406.58	211.014	113.951
10	36	8hIR	181112	2	WT	exp1	8h	0	1407.21	115.664	63.0215
10	37	8hIR	181112	2	WT	exp1	8h	16	4276.86	482.34	367.569
10	38	8hIR	181112	2	WT	exp1	8h	29	3341.48	372.604	489.057
10	39	8hIR	181112	2	WT	exp1	8h	39	3161.15	307.173	375.582
10	40	8hIR	181112	2	WT	exp1	8h	1	1727.92	205.904	133.678
10	41	8hIR	181112	2	WT	exp1	8h	17	2357.59	976.962	207.178
11	1	2hIR	181112	2	dCTD	exp1	2h	35	1622.93	1039.41	264.23
11	2	2hIR	181112	2	dCTD	exp1	2h	0	2505.62	353.316	214.942
11	3	2hIR	181112	2	dCTD	exp1	2h	22	1655.87	874.947	245.548
11	4	2hIR	181112	2	dCTD	exp1	2h	0	2335.13	268.267	155.824
11	5	2hIR	181112	2	dCTD	exp1	2h	3	2222.14	321.444	195.788
11	6	2hIR	181112	2	dCTD	exp1	2h	48	2183.9	662.257	360.686
11	7	2hIR	181112	2	dCTD	exp1	2h	52	2456.21	641.084	335.849
11	8	2hIR	181112	2	dCTD	exp1	2h	48	2535.33	663.013	398.012
11	9	2hIR	181112	2	dCTD	exp1	2h	20	2371.37	301.625	259.869
11	10	2hIR	181112	2	dCTD	exp1	2h	17	1141.91	573.148	133.423
11	11	2hIR	181112	2	dCTD	exp1	2h	14	2775.31	262.369	209.959
11	12	2hIR	181112	2	dCTD	exp1	2h	21	1109.57	573.888	154.747
11	13	2hIR	181112	2	dCTD	exp1	2h	34	3015.91	439.714	308.863
11	14	2hIR	181112	2	dCTD	exp1	2h	26	2007.57	411.752	210.408
11	15	2hIR	181112	2	dCTD	exp1	2h	33	2066.54	1115.31	264.771
11	16	2hIR	181112	2	dCTD	exp1	2h	0	2992.07	334.391	203.661
11	17	2hIR	181112	2	dCTD	exp1	2h	28	2296.25	280.426	255.469
11	18	2hIR	181112	2	dCTD	exp1	2h	30	1552.64	714.171	205.075
11	19	2hIR	181112	2	dCTD	exp1	2h	29	1854.86	941.766	282.043
11	20	2hIR	181112	2	dCTD	exp1	2h	15	1817.93	965.114	162.844
11	21	2hIR	181112	2	dCTD	exp1	2h	30	3174.96	469.84	318.121
11	22	2hIR	181112	2	dCTD	exp1	2h	28	2003.98	1096.14	240.473
11	23	2hIR	181112	2	dCTD	exp1	2h	32	1801.72	888.774	302.294
11	24	2hIR	181112	2	dCTD	exp1	2h	28	1964.81	951.648	227.298
11	25	2hIR	181112	2	dCTD	exp1	2h	38	3553.4	347.628	339.805
11	26	2hIR	181112	2	dCTD	exp1	2h	17	1757.47	288.358	178.068
11	27	2hIR	181112	2	dCTD	exp1	2h	52	3020.46	398.848	504.229
11	28	2hIR	181112	2	dCTD	exp1	2h	37	4765.15	435.371	397.401
11	29	2hIR	181112	2	dCTD	exp1	2h	13	2136.62	1012.85	176.909
11	30	2hIR	181112	2	dCTD	exp1	2h	14	2085.84	843.336	175.95
11	31	2hIR	181112	2	dCTD	exp1	2h	68	6912.58	725.308	671.431
11	32	2hIR	181112	2	dCTD	exp1	2h	42	2590.47	1064.32	357.613
11	33	2hIR	181112	2	dCTD	exp1	2h	18	1798.29	842.096	166.52
11	34	2hIR	181112	2	dCTD	exp1	2h	21	3766.29	459.098	308.569
11	35	2hIR	181112	2	dCTD	exp1	2h	1	3410.74	300.057	190.227
11	36	2hIR	181112	2	dCTD	exp1	2h	6	3533.13	452.655	237.406
11	37	2hIR	181112	2	dCTD	exp1	2h	18	1375.25	629.458	153.778
11	38	2hIR	181112	2	dCTD	exp1	2h	6	972.446	347.124	82.4063
11	39	2hIR	181112	2	dCTD	exp1	2h	12	1062.1	400.53	96.6725
11	40	2hIR	181112	2	dCTD	exp1	2h	15	3321.25	317.965	239.639
12	1	8hIR	181112	2	dCTD	exp1	8h	2	638.133	179.801	75.328
12	2	8hIR	181112	2	dCTD	exp1	8h	9	1039.65	239.806	137.291
12	3	8hIR	181112	2	dCTD	exp1	8h	24	2515.35	596.43	339.725
12	4	8hIR	181112	2	dCTD	exp1	8h	0	1328.61	158.042	111.866
12	5	8hIR	181112	2	dCTD	exp1	8h	19	2331.93	643.888	447.168
12	6	8hIR	181112	2	dCTD	exp1	8h	0	1561.27	172.253	120.28
12	7	8hIR	181112	2	dCTD	exp1	8h	7	1311.82	750.923	130.776
12	8	8hIR	181112	2	dCTD	exp1	8h	0	1728.46	180.278	119.192
12	9	8hIR	181112	2	dCTD	exp1	8h	0	3301.05	304.101	191.728
12	10	8hIR	181112	2	dCTD	exp1	8h	4	876.952	440.75	79.2048
12	11	8hIR	181112	2	dCTD	exp1	8h	2	1774.93	201.543	145.176
12	12	8hIR	181112	2	dCTD	exp1	8h	33	3446.75	1004.91	436.883
12	13	8hIR	181112	2	dCTD	exp1	8h	22	3646.81	417.366	346.164
12	14	8hIR	181112	2	dCTD	exp1	8h	32	3246.05	1593.8	302.122
12	15	8hIR	181112	2	dCTD	exp1	8h	20	2038.81	684.222	247.017
12	16	8hIR	181112	2	dCTD	exp1	8h	4	2089.41	1055.98	162.124
12	17	8hIR	181112	2	dCTD	exp1	8h	26	3345.08	397.719	346.809
12	18	8hIR	181112	2	dCTD	exp1	8h	37	3923.62	352.04	504.771
12	19	8hIR	181112	2	dCTD	exp1	8h	1	4028.93	348.508	239.023
12	20	8hIR	181112	2	dCTD	exp1	8h	7	3916.94	316.269	255.879
12	21	8hIR	181112	2	dCTD	exp1	8h	2	1255.35	405.716	107.085
12	22	8hIR	181112	2	dCTD	exp1	8h	13	3361.39	1560.09	236.201
12	23	8hIR	181112	2	dCTD	exp1	8h	4	4840.35	401.011	300.934
12	24	8hIR	181112	2	dCTD	exp1	8h	0	2406.96	868.463	170.019
12	25	8hIR	181112	2	dCTD	exp1	8h	46	2992.28	2255.13	333.667
12	26	8hIR	181112	2	dCTD	exp1	8h	5	4457.42	391.187	301.832
12	27	8hIR	181112	2	dCTD	exp1	8h	3	1649.02	518.197	141.627
12	28	8hIR	181112	2	dCTD	exp1	8h	16	2669.06	1681.32	217.18
12	29	8hIR	181112	2	dCTD	exp1	8h	4	2414.9	841.19	169.764
12	30	8hIR	181112	2	dCTD	exp1	8h	3	4990.37	515.258	380.605
12	31	8hIR	181112	2	dCTD	exp1	8h	37	3307.36	1051.41	373.308
12	32	8hIR	181112	2	dCTD	exp1	8h	32	2330.81	790.488	328.778
12	33	8hIR	181112	2	dCTD	exp1	8h	27	2559.27	557.503	283.001
12	34	8hIR	181112	2	dCTD	exp1	8h	21	2009.57	671.954	209.495
13	1	2hIR	181112	2	dDBD	exp1	2h	35	1574.01	277.368	287.284
13	2	2hIR	181112	2	dDBD	exp1	2h	6	2128.12	273.366	196.009
13	3	2hIR	181112	2	dDBD	exp1	2h	1	1056.92	790.968	98.3609
13	4	2hIR	181112	2	dDBD	exp1	2h	47	1862.98	735.609	349.971
13	5	2hIR	181112	2	dDBD	exp1	2h	12	1184.77	1364.39	170.289
13	6	2hIR	181112	2	dDBD	exp1	2h	10	2523.91	305.808	233.913
13	7	2hIR	181112	2	dDBD	exp1	2h	5	1305.63	651.688	111.161
13	8	2hIR	181112	2	dDBD	exp1	2h	32	1394.53	977.211	241.714
13	9	2hIR	181112	2	dDBD	exp1	2h	11	1114.16	1243.81	148.373
13	10	2hIR	181112	2	dDBD	exp1	2h	20	2142.83	472.886	181.735
13	11	2hIR	181112	2	dDBD	exp1	2h	22	2518.68	243.474	240.557
13	12	2hIR	181112	2	dDBD	exp1	2h	32	1516.36	476.583	246.168
13	13	2hIR	181112	2	dDBD	exp1	2h	32	1791.19	1387.57	262.753
13	14	2hIR	181112	2	dDBD	exp1	2h	28	1837.91	502.308	194.672
13	15	2hIR	181112	2	dDBD	exp1	2h	33	1595.6	1028.65	249.958
13	16	2hIR	181112	2	dDBD	exp1	2h	35	2015.09	1232.09	245.205
13	17	2hIR	181112	2	dDBD	exp1	2h	23	1053.3	263.561	205.828
13	18	2hIR	181112	2	dDBD	exp1	2h	35	2365.06	340.313	278.354
13	19	2hIR	181112	2	dDBD	exp1	2h	21	1914.57	1168.81	214.508
13	20	2hIR	181112	2	dDBD	exp1	2h	22	2333.01	240.938	222.684
13	21	2hIR	181112	2	dDBD	exp1	2h	32	1643.35	1163.48	217.005
13	22	2hIR	181112	2	dDBD	exp1	2h	10	1554.49	908.802	158.143
13	23	2hIR	181112	2	dDBD	exp1	2h	31	1813.69	1243.08	278.635
13	24	2hIR	181112	2	dDBD	exp1	2h	60	2215.05	1216.73	395.063
13	25	2hIR	181112	2	dDBD	exp1	2h	43	2705.21	713.472	360.552
13	26	2hIR	181112	2	dDBD	exp1	2h	37	2849.5	630.039	282.401
13	27	2hIR	181112	2	dDBD	exp1	2h	35	1796	1350.21	269.37
13	28	2hIR	181112	2	dDBD	exp1	2h	45	2717.53	491.339	312.501
13	29	2hIR	181112	2	dDBD	exp1	2h	7	1337.42	1006.45	137.106
13	30	2hIR	181112	2	dDBD	exp1	2h	45	2083.75	615.865	338.337
13	31	2hIR	181112	2	dDBD	exp1	2h	34	3459.06	1151.78	363.1
13	32	2hIR	181112	2	dDBD	exp1	2h	47	2796.32	555.306	379.945
13	33	2hIR	181112	2	dDBD	exp1	2h	47	2424.38	767.652	405.714
13	34	2hIR	181112	2	dDBD	exp1	2h	0	879.13	118.861	65.7302
13	35	2hIR	181112	2	dDBD	exp1	2h	41	2062.23	570.24	335.545
13	36	2hIR	181112	2	dDBD	exp1	2h	0	3057.03	271.438	180.029
13	37	2hIR	181112	2	dDBD	exp1	2h	0	851.32	128.205	69.751
13	38	2hIR	181112	2	dDBD	exp1	2h	9	1275.09	470.507	105.487
13	39	2hIR	181112	2	dDBD	exp1	2h	46	2258.12	756.421	396.341
13	40	2hIR	181112	2	dDBD	exp1	2h	24	4969.99	714.243	380.954
13	41	2hIR	181112	2	dDBD	exp1	2h	5	1283.22	680.05	137.793
14	1	8hIR	181112	2	dDBD	exp1	8h	6	1113.91	188.238	158.894
14	2	8hIR	181112	2	dDBD	exp1	8h	3	1090.96	200.255	162.479
14	3	8hIR	181112	2	dDBD	exp1	8h	5	1428.14	217.917	157.736
14	4	8hIR	181112	2	dDBD	exp1	8h	30	2564.79	1073.59	485.684
14	5	8hIR	181112	2	dDBD	exp1	8h	3	1701.88	261.378	162.243
14	6	8hIR	181112	2	dDBD	exp1	8h	22	2353.52	297.117	435.297
14	7	8hIR	181112	2	dDBD	exp1	8h	47	2359.02	2743.01	450.341
14	8	8hIR	181112	2	dDBD	exp1	8h	75	5114.51	1687.96	786.922
14	9	8hIR	181112	2	dDBD	exp1	8h	16	2822.79	915.398	276.893
14	10	8hIR	181112	2	dDBD	exp1	8h	39	1546.64	6208.23	280.637
14	11	8hIR	181112	2	dDBD	exp1	8h	0	3243.57	356.523	251.008
14	12	8hIR	181112	2	dDBD	exp1	8h	1	3396.5	385.605	258.886
14	13	8hIR	181112	2	dDBD	exp1	8h	10	3740.54	382.4	283.782
14	14	8hIR	181112	2	dDBD	exp1	8h	1	1742.25	243.238	177.837
14	15	8hIR	181112	2	dDBD	exp1	8h	9	1465.53	310.248	106.542
14	16	8hIR	181112	2	dDBD	exp1	8h	37	3172.39	551.719	534.858
14	17	8hIR	181112	2	dDBD	exp1	8h	13	2155.42	513.777	188.629
14	18	8hIR	181112	2	dDBD	exp1	8h	0	1720.27	148.772	100.436
14	19	8hIR	181112	2	dDBD	exp1	8h	25	4590.37	1136.66	411.024
14	20	8hIR	181112	2	dDBD	exp1	8h	23	3247.08	358.644	302.358
14	21	8hIR	181112	2	dDBD	exp1	8h	49	2294.44	4963.05	359.981
14	22	8hIR	181112	2	dDBD	exp1	8h	4	4720.23	505.884	326.146
14	23	8hIR	181112	2	dDBD	exp1	8h	33	3011.84	630.403	361.289
14	24	8hIR	181112	2	dDBD	exp1	8h	9	3961.73	363.206	275.686
14	25	8hIR	181112	2	dDBD	exp1	8h	0	453.247	54.1708	33.9882
14	26	8hIR	181112	2	dDBD	exp1	8h	8	1399.45	167.721	156.951
14	27	8hIR	181112	2	dDBD	exp1	8h	7	2800.69	354.35	288.602
14	28	8hIR	181112	2	dDBD	exp1	8h	41	2281.04	5804.02	334.838
14	29	8hIR	181112	2	dDBD	exp1	8h	1	4109.29	361.771	229.296
14	30	8hIR	181112	2	dDBD	exp1	8h	3	3517.05	335.873	242.603
14	31	8hIR	181112	2	dDBD	exp1	8h	10	3716.33	466.007	330.713
14	32	8hIR	181112	2	dDBD	exp1	8h	23	1819.1	394.193	226.832
15	1	2hIR	181112	2	dDBDdCTD	exp1	2h	12	972.066	166.602	176.602
15	2	2hIR	181112	2	dDBDdCTD	exp1	2h	16	1069.42	585.845	195.072
15	3	2hIR	181112	2	dDBDdCTD	exp1	2h	17	2145.4	315.198	311.489
15	4	2hIR	181112	2	dDBDdCTD	exp1	2h	39	1933.62	454.886	325.018
15	5	2hIR	181112	2	dDBDdCTD	exp1	2h	10	1188.09	154.546	153.436
15	6	2hIR	181112	2	dDBDdCTD	exp1	2h	22	1048.08	656.698	192.024
15	7	2hIR	181112	2	dDBDdCTD	exp1	2h	41	1354.96	750.892	288.858
15	8	2hIR	181112	2	dDBDdCTD	exp1	2h	24	1103.9	626.697	197.862
15	9	2hIR	181112	2	dDBDdCTD	exp1	2h	30	2213.43	302.223	325.247
15	10	2hIR	181112	2	dDBDdCTD	exp1	2h	6	548.228	169.346	72.6086
15	11	2hIR	181112	2	dDBDdCTD	exp1	2h	25	975.238	539.235	210.993
15	12	2hIR	181112	2	dDBDdCTD	exp1	2h	10	698.674	230.327	98.4622
15	13	2hIR	181112	2	dDBDdCTD	exp1	2h	32	2633.2	326.098	349.14
15	14	2hIR	181112	2	dDBDdCTD	exp1	2h	2	884.882	107.125	97.0076
15	15	2hIR	181112	2	dDBDdCTD	exp1	2h	20	2386.15	291.699	242.011
15	16	2hIR	181112	2	dDBDdCTD	exp1	2h	30	1275.88	709.872	250.572
15	17	2hIR	181112	2	dDBDdCTD	exp1	2h	6	937.071	444.399	140.479
15	18	2hIR	181112	2	dDBDdCTD	exp1	2h	64	4198.04	889.669	547.28
15	19	2hIR	181112	2	dDBDdCTD	exp1	2h	4	2686.55	311.852	298.962
15	20	2hIR	181112	2	dDBDdCTD	exp1	2h	29	1389.4	448.408	213.742
15	21	2hIR	181112	2	dDBDdCTD	exp1	2h	5	1077.77	491.14	154.878
15	22	2hIR	181112	2	dDBDdCTD	exp1	2h	57	5063.59	1321.38	672.577
15	23	2hIR	181112	2	dDBDdCTD	exp1	2h	4	1358.62	334.885	157.664
15	24	2hIR	181112	2	dDBDdCTD	exp1	2h	0	761.952	98.3183	58.6783
15	25	2hIR	181112	2	dDBDdCTD	exp1	2h	15	1489.72	160.064	165.918
15	26	2hIR	181112	2	dDBDdCTD	exp1	2h	1	3095.14	309.476	241.17
15	27	2hIR	181112	2	dDBDdCTD	exp1	2h	1	1291.79	425.186	170.199
15	28	2hIR	181112	2	dDBDdCTD	exp1	2h	20	1492.15	171.791	184.017
15	29	2hIR	181112	2	dDBDdCTD	exp1	2h	17	1127.4	346.398	125.274
15	30	2hIR	181112	2	dDBDdCTD	exp1	2h	15	1281.31	320.638	240.322
15	31	2hIR	181112	2	dDBDdCTD	exp1	2h	41	2980.31	326.695	326.6
15	32	2hIR	181112	2	dDBDdCTD	exp1	2h	26	3554.3	620.477	361.522
15	33	2hIR	181112	2	dDBDdCTD	exp1	2h	2	3539.59	325.257	265.595
15	34	2hIR	181112	2	dDBDdCTD	exp1	2h	17	3127.98	292.144	316.562
15	35	2hIR	181112	2	dDBDdCTD	exp1	2h	38	1831.49	442.361	292.219
15	36	2hIR	181112	2	dDBDdCTD	exp1	2h	17	1562.55	289.883	184.582
15	37	2hIR	181112	2	dDBDdCTD	exp1	2h	39	1418.97	404.755	221.819
15	38	2hIR	181112	2	dDBDdCTD	exp1	2h	11	3102.46	395.968	268.576
15	39	2hIR	181112	2	dDBDdCTD	exp1	2h	0	1807.04	217.348	147.995
15	40	2hIR	181112	2	dDBDdCTD	exp1	2h	67	3715.15	1045.24	561.173
15	41	2hIR	181112	2	dDBDdCTD	exp1	2h	32	1466.87	330.835	261.939
15	42	2hIR	181112	2	dDBDdCTD	exp1	2h	31	1537.76	407.651	237.74
15	43	2hIR	181112	2	dDBDdCTD	exp1	2h	20	2252.15	495.104	310.057
15	44	2hIR	181112	2	dDBDdCTD	exp1	2h	28	2298.39	331.116	358.464
15	45	2hIR	181112	2	dDBDdCTD	exp1	2h	27	1518.78	289.511	216.572
15	46	2hIR	181112	2	dDBDdCTD	exp1	2h	9	3053.2	326.478	332.988
15	47	2hIR	181112	2	dDBDdCTD	exp1	2h	50	2831.02	279.698	333.084
15	48	2hIR	181112	2	dDBDdCTD	exp1	2h	8	2348.34	412.055	182.924
15	49	2hIR	181112	2	dDBDdCTD	exp1	2h	71	3903.71	1049.11	528.542
15	50	2hIR	181112	2	dDBDdCTD	exp1	2h	13	1301.09	450.043	145.605
16	1	2hIR	181112	3	WT	exp1	2h	17	1364.06	387.062	245.71
16	2	2hIR	181112	3	WT	exp1	2h	35	2463.82	1388.58	499.163
16	3	2hIR	181112	3	WT	exp1	2h	0	1288.26	190.301	118.508
16	4	2hIR	181112	3	WT	exp1	2h	0	1487.85	321.546	147.108
16	5	2hIR	181112	3	WT	exp1	2h	16	1185.14	377.064	230.795
16	6	2hIR	181112	3	WT	exp1	2h	0	1463.73	224.985	105.801
16	7	2hIR	181112	3	WT	exp1	2h	38	3029.92	1095.48	458.944
16	8	2hIR	181112	3	WT	exp1	2h	47	2100.41	1963.9	553.379
16	9	2hIR	181112	3	WT	exp1	2h	20	2024.39	834.648	269.454
16	10	2hIR	181112	3	WT	exp1	2h	37	3075.14	1515.42	565.318
16	11	2hIR	181112	3	WT	exp1	2h	40	3273.95	386.808	529.87
16	12	2hIR	181112	3	WT	exp1	2h	43	2236.26	1633.3	518.384
16	13	2hIR	181112	3	WT	exp1	2h	15	1082.71	491.451	189.069
16	14	2hIR	181112	3	WT	exp1	2h	53	6046.74	1420.35	689.164
16	15	2hIR	181112	3	WT	exp1	2h	8	1884.99	1027.61	157.877
16	16	2hIR	181112	3	WT	exp1	2h	38	3086.2	572.506	617.285
16	17	2hIR	181112	3	WT	exp1	2h	45	2736.76	1496.09	530.241
16	18	2hIR	181112	3	WT	exp1	2h	0	4269.53	511.546	250.56
16	19	2hIR	181112	3	WT	exp1	2h	46	2634.91	1168.31	560.5
16	20	2hIR	181112	3	WT	exp1	2h	10	2090.4	1210.41	181.352
16	21	2hIR	181112	3	WT	exp1	2h	5	565.845	235.082	83.4525
16	22	2hIR	181112	3	WT	exp1	2h	0	1859.03	266.338	125.183
16	23	2hIR	181112	3	WT	exp1	2h	25	2504.63	1121.43	267.806
16	24	2hIR	181112	3	WT	exp1	2h	66	3859.74	442.737	732.856
16	25	2hIR	181112	3	WT	exp1	2h	42	2795.38	2203.67	478.947
16	26	2hIR	181112	3	WT	exp1	2h	9	1303.92	589.668	146.641
16	27	2hIR	181112	3	WT	exp1	2h	4	473.203	254.761	63.0399
16	28	2hIR	181112	3	WT	exp1	2h	34	3154.94	1622.71	521.067
16	29	2hIR	181112	3	WT	exp1	2h	69	3853.04	705.322	901.198
16	30	2hIR	181112	3	WT	exp1	2h	45	3315.28	1207.78	492.923
16	31	2hIR	181112	3	WT	exp1	2h	44	2424.28	1105.96	497.233
16	32	2hIR	181112	3	WT	exp1	2h	30	2801.36	445.507	390.943
16	33	2hIR	181112	3	WT	exp1	2h	58	2664.57	1556.85	593.477
16	34	2hIR	181112	3	WT	exp1	2h	55	3620.77	812.494	804.212
16	35	2hIR	181112	3	WT	exp1	2h	16	2268.31	575.4	227.552
16	36	2hIR	181112	3	WT	exp1	2h	71	3580.6	958.896	828.821
16	37	2hIR	181112	3	WT	exp1	2h	22	1751.37	454.399	259.061
17	1	8hIR	181112	3	WT	exp1	8h	3	1159.46	170.204	95.4793
17	2	8hIR	181112	3	WT	exp1	8h	0	1228.39	185.439	121.395
17	3	8hIR	181112	3	WT	exp1	8h	8	2096.9	323.833	241.744
17	4	8hIR	181112	3	WT	exp1	8h	2	1535.31	212.1	135.198
17	5	8hIR	181112	3	WT	exp1	8h	10	1376.26	199.97	150.673
17	6	8hIR	181112	3	WT	exp1	8h	8	1249.9	176.011	162.577
17	7	8hIR	181112	3	WT	exp1	8h	12	2623.2	357.056	257.484
17	8	8hIR	181112	3	WT	exp1	8h	8	1509.58	278.02	157.793
17	9	8hIR	181112	3	WT	exp1	8h	4	2925.75	353.546	239.036
17	10	8hIR	181112	3	WT	exp1	8h	10	508.182	904.816	62.2091
17	11	8hIR	181112	3	WT	exp1	8h	9	2821.17	347.339	242.518
17	12	8hIR	181112	3	WT	exp1	8h	16	1894.2	2373.08	202.087
17	13	8hIR	181112	3	WT	exp1	8h	2	1553.15	221.824	139.666
17	14	8hIR	181112	3	WT	exp1	8h	20	1368.06	1974.73	179.883
17	15	8hIR	181112	3	WT	exp1	8h	29	3320.9	395.924	400.305
17	16	8hIR	181112	3	WT	exp1	8h	16	1705.93	1833.46	163.543
17	17	8hIR	181112	3	WT	exp1	8h	17	3201.77	357.425	301.506
17	18	8hIR	181112	3	WT	exp1	8h	13	2154.09	255.332	179.651
17	19	8hIR	181112	3	WT	exp1	8h	12	1666.84	789.498	133.554
17	20	8hIR	181112	3	WT	exp1	8h	10	2002.03	239.087	165.177
17	21	8hIR	181112	3	WT	exp1	8h	29	3109.21	2212.92	320.222
17	22	8hIR	181112	3	WT	exp1	8h	15	3366.7	366.972	298.988
17	23	8hIR	181112	3	WT	exp1	8h	6	2248.09	302.798	194.15
17	24	8hIR	181112	3	WT	exp1	8h	6	2007.15	209.29	161.227
17	25	8hIR	181112	3	WT	exp1	8h	33	3578.89	1264.28	553.815
17	26	8hIR	181112	3	WT	exp1	8h	16	5275.18	481.124	372.992
17	27	8hIR	181112	3	WT	exp1	8h	60	5784.74	1126.08	795.763
17	28	8hIR	181112	3	WT	exp1	8h	14	2070.37	5274.83	180.165
17	29	8hIR	181112	3	WT	exp1	8h	19	2337.58	5063.68	198.779
17	30	8hIR	181112	3	WT	exp1	8h	63	4110.03	1014.43	487.226
17	31	8hIR	181112	3	WT	exp1	8h	7	8208.59	733.641	436.28
17	32	8hIR	181112	3	WT	exp1	8h	13	4810.61	2175.18	391.441
17	33	8hIR	181112	3	WT	exp1	8h	1	4220.68	452.96	230.277
17	34	8hIR	181112	3	WT	exp1	8h	0	1392.92	121.049	65.4944
17	35	8hIR	181112	3	WT	exp1	8h	0	1081.22	91.77	49.2422
17	36	8hIR	181112	3	WT	exp1	8h	8	4251.36	467.007	353.875
17	37	8hIR	181112	3	WT	exp1	8h	2	1675.99	193.745	105.778
18	1	2hIR	181112	3	dCTD	exp1	2h	45	1844.4	847.595	337.377
18	2	2hIR	181112	3	dCTD	exp1	2h	35	1432.84	1318.92	274.642
18	3	2hIR	181112	3	dCTD	exp1	2h	52	1682.14	1316.33	384.08
18	4	2hIR	181112	3	dCTD	exp1	2h	28	1790.22	797.193	233.369
18	5	2hIR	181112	3	dCTD	exp1	2h	27	1169.77	1480.95	206.852
18	6	2hIR	181112	3	dCTD	exp1	2h	32	1370.09	1065.11	202.416
18	7	2hIR	181112	3	dCTD	exp1	2h	37	2182.85	773.222	329.053
18	8	2hIR	181112	3	dCTD	exp1	2h	34	1986.8	810.898	266.491
18	9	2hIR	181112	3	dCTD	exp1	2h	38	1967.94	1203.5	324.363
18	10	2hIR	181112	3	dCTD	exp1	2h	32	1560.87	590.592	232.428
18	11	2hIR	181112	3	dCTD	exp1	2h	46	1439.34	940.79	282.687
18	12	2hIR	181112	3	dCTD	exp1	2h	41	1929.22	725.888	268.443
18	13	2hIR	181112	3	dCTD	exp1	2h	60	1953.53	516.726	386.734
18	14	2hIR	181112	3	dCTD	exp1	2h	8	1919.01	503.921	134.296
18	15	2hIR	181112	3	dCTD	exp1	2h	71	3108.38	1980.47	465.026
18	16	2hIR	181112	3	dCTD	exp1	2h	27	2291.26	1031.27	227.771
18	17	2hIR	181112	3	dCTD	exp1	2h	15	2220.11	499.555	168.304
18	18	2hIR	181112	3	dCTD	exp1	2h	25	1225.6	1145.12	189.794
18	19	2hIR	181112	3	dCTD	exp1	2h	26	1381.87	778.216	177.944
18	20	2hIR	181112	3	dCTD	exp1	2h	12	1154.68	808.964	139.232
18	21	2hIR	181112	3	dCTD	exp1	2h	15	1421.38	750.107	151.807
18	22	2hIR	181112	3	dCTD	exp1	2h	34	2473.42	1151.87	300.486
18	23	2hIR	181112	3	dCTD	exp1	2h	27	1354.17	929	188.809
18	24	2hIR	181112	3	dCTD	exp1	2h	7	1499.28	892.244	134.032
18	25	2hIR	181112	3	dCTD	exp1	2h	20	2334.15	1462.87	242.703
18	26	2hIR	181112	3	dCTD	exp1	2h	17	2174.1	442.684	211.916
18	27	2hIR	181112	3	dCTD	exp1	2h	16	1291.46	719.468	134.656
18	28	2hIR	181112	3	dCTD	exp1	2h	54	3865.28	1589.74	405.494
18	29	2hIR	181112	3	dCTD	exp1	2h	2	1620.47	245.541	117.07
18	30	2hIR	181112	3	dCTD	exp1	2h	20	1407.06	915.722	169.488
18	31	2hIR	181112	3	dCTD	exp1	2h	20	1670.94	842.464	187.984
18	32	2hIR	181112	3	dCTD	exp1	2h	17	1859.31	688.412	191.212
18	33	2hIR	181112	3	dCTD	exp1	2h	1	858.83	366.046	64.0911
18	34	2hIR	181112	3	dCTD	exp1	2h	2	1223.13	539.182	92.4681
18	35	2hIR	181112	3	dCTD	exp1	2h	0	427.698	55.851	31.3573
18	36	2hIR	181112	3	dCTD	exp1	2h	45	2942.07	1021.26	308.52
18	37	2hIR	181112	3	dCTD	exp1	2h	2	2528.88	210.653	134.02
18	38	2hIR	181112	3	dCTD	exp1	2h	3	1352.76	540.188	108.238
18	39	2hIR	181112	3	dCTD	exp1	2h	0	1021.62	459.72	84.03
18	40	2hIR	181112	3	dCTD	exp1	2h	30	2053.07	1233.52	206.396
18	41	2hIR	181112	3	dCTD	exp1	2h	33	1995.24	1036.11	229.607
18	42	2hIR	181112	3	dCTD	exp1	2h	38	1917.01	1025.8	268.409
18	43	2hIR	181112	3	dCTD	exp1	2h	17	1020.12	312.044	95.0125
18	44	2hIR	181112	3	dCTD	exp1	2h	26	1513.89	402.917	138.801
18	45	2hIR	181112	3	dCTD	exp1	2h	30	2634.15	826.866	262.536
18	46	2hIR	181112	3	dCTD	exp1	2h	36	1928.21	1223.27	232.2
19	1	8hIR	181112	3	dCTD	exp1	8h	23	1445.41	413.109	240.078
19	2	8hIR	181112	3	dCTD	exp1	8h	26	2598.08	1151.26	312.16
19	3	8hIR	181112	3	dCTD	exp1	8h	4	1061.76	466.695	79.1697
19	4	8hIR	181112	3	dCTD	exp1	8h	22	2779.45	682.734	326.477
19	5	8hIR	181112	3	dCTD	exp1	8h	3	1083.26	741.496	127.65
19	6	8hIR	181112	3	dCTD	exp1	8h	23	3715.42	1608.75	300.721
19	7	8hIR	181112	3	dCTD	exp1	8h	10	610.908	380.43	77.2989
19	8	8hIR	181112	3	dCTD	exp1	8h	9	2734	296.233	244.849
19	9	8hIR	181112	3	dCTD	exp1	8h	16	3577.54	1798.88	345.87
19	10	8hIR	181112	3	dCTD	exp1	8h	11	2112.14	1117.42	206.046
19	11	8hIR	181112	3	dCTD	exp1	8h	1	3507.47	379.61	278.759
19	12	8hIR	181112	3	dCTD	exp1	8h	8	1956.64	990.269	173.453
19	13	8hIR	181112	3	dCTD	exp1	8h	41	4102.92	878.368	517.163
19	14	8hIR	181112	3	dCTD	exp1	8h	0	1228.92	128.12	89.7835
19	15	8hIR	181112	3	dCTD	exp1	8h	1	1057.14	103.427	78.5613
19	16	8hIR	181112	3	dCTD	exp1	8h	15	3805.5	1374.98	229.929
19	17	8hIR	181112	3	dCTD	exp1	8h	14	2057.91	538.19	191.79
19	18	8hIR	181112	3	dCTD	exp1	8h	1	1693.2	179.248	123.98
19	19	8hIR	181112	3	dCTD	exp1	8h	7	1834.41	1032.74	160.574
19	20	8hIR	181112	3	dCTD	exp1	8h	21	2352.25	748.86	222.545
19	21	8hIR	181112	3	dCTD	exp1	8h	1	1623.19	601.18	109.75
19	22	8hIR	181112	3	dCTD	exp1	8h	58	6320.49	7058.97	680.542
19	23	8hIR	181112	3	dCTD	exp1	8h	0	4423.29	366.042	184.514
19	24	8hIR	181112	3	dCTD	exp1	8h	14	3824.69	405.043	390.536
19	25	8hIR	181112	3	dCTD	exp1	8h	19	4748.67	792.079	307.032
19	26	8hIR	181112	3	dCTD	exp1	8h	36	4122.63	952.297	383.28
19	27	8hIR	181112	3	dCTD	exp1	8h	29	2606.65	3223.55	279.476
19	28	8hIR	181112	3	dCTD	exp1	8h	9	2728.15	919.175	204.323
19	29	8hIR	181112	3	dCTD	exp1	8h	28	2440.08	3140.26	294.147
19	30	8hIR	181112	3	dCTD	exp1	8h	64	6760.32	2654.58	667.047
19	31	8hIR	181112	3	dCTD	exp1	8h	4	1545.84	143.765	118.39
19	32	8hIR	181112	3	dCTD	exp1	8h	5	2032.33	186.093	157.283
19	33	8hIR	181112	3	dCTD	exp1	8h	1	4750.67	438.681	281.857
20	1	2hIR	181112	3	dDBD	exp1	2h	20	1704.78	263.699	209.656
20	2	2hIR	181112	3	dDBD	exp1	2h	13	1256.08	648.279	147.126
20	3	2hIR	181112	3	dDBD	exp1	2h	12	2032.69	407.573	288.538
20	4	2hIR	181112	3	dDBD	exp1	2h	20	2044.98	272.445	211.998
20	5	2hIR	181112	3	dDBD	exp1	2h	7	1179.67	592.905	117.823
20	6	2hIR	181112	3	dDBD	exp1	2h	0	1267.29	198.135	106.461
20	7	2hIR	181112	3	dDBD	exp1	2h	24	1632.9	210.319	219.559
20	8	2hIR	181112	3	dDBD	exp1	2h	27	2417.05	287.614	272.662
20	9	2hIR	181112	3	dDBD	exp1	2h	0	1238.01	152.307	91.9004
20	10	2hIR	181112	3	dDBD	exp1	2h	35	1569.44	740.63	244.518
20	11	2hIR	181112	3	dDBD	exp1	2h	34	2242.45	318.683	339.039
20	12	2hIR	181112	3	dDBD	exp1	2h	22	2154.53	995.954	236.756
20	13	2hIR	181112	3	dDBD	exp1	2h	24	2283.77	301.067	259.999
20	14	2hIR	181112	3	dDBD	exp1	2h	9	2503.45	264.978	194.978
20	15	2hIR	181112	3	dDBD	exp1	2h	45	1661.1	561.257	472.576
20	16	2hIR	181112	3	dDBD	exp1	2h	44	2180.35	1065.86	335.516
20	17	2hIR	181112	3	dDBD	exp1	2h	15	1892.37	255.584	195.885
20	18	2hIR	181112	3	dDBD	exp1	2h	9	2578.55	235.927	183.635
20	19	2hIR	181112	3	dDBD	exp1	2h	39	1725.05	935.038	274.026
20	20	2hIR	181112	3	dDBD	exp1	2h	1	1157.96	211.187	183.898
20	21	2hIR	181112	3	dDBD	exp1	2h	41	1907.02	1073.31	278.924
20	22	2hIR	181112	3	dDBD	exp1	2h	30	1489.26	1055.13	207.391
20	23	2hIR	181112	3	dDBD	exp1	2h	0	3310.4	320.918	210.054
20	24	2hIR	181112	3	dDBD	exp1	2h	24	1743.35	410.978	199.012
20	25	2hIR	181112	3	dDBD	exp1	2h	33	3787.04	350.208	389.456
20	26	2hIR	181112	3	dDBD	exp1	2h	38	1914.12	648.164	383.464
20	27	2hIR	181112	3	dDBD	exp1	2h	24	1963.09	907.708	221.72
20	28	2hIR	181112	3	dDBD	exp1	2h	24	1336.74	930.654	186.006
20	29	2hIR	181112	3	dDBD	exp1	2h	23	1942.02	882.636	185.953
20	30	2hIR	181112	3	dDBD	exp1	2h	33	3173.24	305.852	328.179
20	31	2hIR	181112	3	dDBD	exp1	2h	29	1845.28	307.12	233.522
20	32	2hIR	181112	3	dDBD	exp1	2h	26	1228.65	1043.59	230.623
20	33	2hIR	181112	3	dDBD	exp1	2h	3	1440.66	580.914	101.162
20	34	2hIR	181112	3	dDBD	exp1	2h	26	1360.27	902.831	214.967
20	35	2hIR	181112	3	dDBD	exp1	2h	27	2989.76	300.311	287.171
20	36	2hIR	181112	3	dDBD	exp1	2h	43	2999.14	293.406	362.038
20	37	2hIR	181112	3	dDBD	exp1	2h	36	1485.25	1286.12	230.227
20	38	2hIR	181112	3	dDBD	exp1	2h	34	1265.73	1108	227.527
21	1	8hIR	181112	3	dDBD	exp1	8h	9	2668.7	433.249	367.179
21	2	8hIR	181112	3	dDBD	exp1	8h	2	777.232	1327.67	100.021
21	3	8hIR	181112	3	dDBD	exp1	8h	11	2443.96	342.26	282.191
21	4	8hIR	181112	3	dDBD	exp1	8h	30	2766.28	1438.79	434.241
21	5	8hIR	181112	3	dDBD	exp1	8h	22	2524	1343.6	369.527
21	6	8hIR	181112	3	dDBD	exp1	8h	8	3119.88	415.324	342.46
21	7	8hIR	181112	3	dDBD	exp1	8h	13	1455.9	2013.33	191.391
21	8	8hIR	181112	3	dDBD	exp1	8h	19	3065.83	354.624	342.793
21	9	8hIR	181112	3	dDBD	exp1	8h	25	3162.06	539.181	551.082
21	10	8hIR	181112	3	dDBD	exp1	8h	33	2270.01	1987.21	331.064
21	11	8hIR	181112	3	dDBD	exp1	8h	25	2102.95	1751.72	306.758
21	12	8hIR	181112	3	dDBD	exp1	8h	24	2908.95	973.261	351.041
21	13	8hIR	181112	3	dDBD	exp1	8h	45	3082.06	1964.94	669.956
21	14	8hIR	181112	3	dDBD	exp1	8h	20	1532.83	3218.96	267.613
21	15	8hIR	181112	3	dDBD	exp1	8h	14	2179.5	294.321	254.233
21	16	8hIR	181112	3	dDBD	exp1	8h	15	2601.75	476.161	287.876
21	17	8hIR	181112	3	dDBD	exp1	8h	14	3921.21	370.624	358.81
21	18	8hIR	181112	3	dDBD	exp1	8h	23	2772.78	949.775	330.618
21	19	8hIR	181112	3	dDBD	exp1	8h	26	3174.66	1421.57	450.436
21	20	8hIR	181112	3	dDBD	exp1	8h	32	1850.75	3647.65	306.305
21	21	8hIR	181112	3	dDBD	exp1	8h	30	3649.96	742.429	412.508
21	22	8hIR	181112	3	dDBD	exp1	8h	31	4190.05	570.192	501.392
21	23	8hIR	181112	3	dDBD	exp1	8h	29	3167.95	415.734	368.857
21	24	8hIR	181112	3	dDBD	exp1	8h	26	3197.04	1144.58	358.193
21	25	8hIR	181112	3	dDBD	exp1	8h	17	3074.02	334.344	339.411
21	26	8hIR	181112	3	dDBD	exp1	8h	0	2190.12	1124.79	155.007
21	27	8hIR	181112	3	dDBD	exp1	8h	0	740.73	388.409	50.3533
21	28	8hIR	181112	3	dDBD	exp1	8h	34	3614.08	1500.08	412.387
21	29	8hIR	181112	3	dDBD	exp1	8h	0	1353.21	199.198	145.79
21	30	8hIR	181112	3	dDBD	exp1	8h	24	3137.18	336.873	377.22
22	1	2hIR	181112	3	dDBDdCTD	exp1	2h	46	2084.8	866.069	336.218
22	2	2hIR	181112	3	dDBDdCTD	exp1	2h	46	1664.64	1053.59	342.014
22	3	2hIR	181112	3	dDBDdCTD	exp1	2h	26	1419.14	747.17	231.067
22	4	2hIR	181112	3	dDBDdCTD	exp1	2h	30	1520.12	763.236	275.254
22	5	2hIR	181112	3	dDBDdCTD	exp1	2h	44	2045.91	1016.48	377.982
22	6	2hIR	181112	3	dDBDdCTD	exp1	2h	54	1902.22	798.314	389.917
22	7	2hIR	181112	3	dDBDdCTD	exp1	2h	0	1646.47	314.942	143.455
22	8	2hIR	181112	3	dDBDdCTD	exp1	2h	46	1963.85	1173.21	361.345
22	9	2hIR	181112	3	dDBDdCTD	exp1	2h	25	1069.34	709.799	218.403
22	10	2hIR	181112	3	dDBDdCTD	exp1	2h	37	2191.75	822.006	344.814
22	11	2hIR	181112	3	dDBDdCTD	exp1	2h	38	3173.67	941.211	332.694
22	12	2hIR	181112	3	dDBDdCTD	exp1	2h	45	2023.55	1172.29	309.932
22	13	2hIR	181112	3	dDBDdCTD	exp1	2h	51	3151.21	495.139	433.685
22	14	2hIR	181112	3	dDBDdCTD	exp1	2h	31	3264.96	869	302.834
22	15	2hIR	181112	3	dDBDdCTD	exp1	2h	52	3473.16	482.161	405.998
22	16	2hIR	181112	3	dDBDdCTD	exp1	2h	34	3787.58	422.856	434.051
22	17	2hIR	181112	3	dDBDdCTD	exp1	2h	52	2081.99	953.503	379.093
22	18	2hIR	181112	3	dDBDdCTD	exp1	2h	1	2042.57	348.955	290.54
22	19	2hIR	181112	3	dDBDdCTD	exp1	2h	36	3584.72	567.143	351.69
22	20	2hIR	181112	3	dDBDdCTD	exp1	2h	10	936.946	166.305	150.012
22	21	2hIR	181112	3	dDBDdCTD	exp1	2h	48	1755.91	821.612	310.482
22	22	2hIR	181112	3	dDBDdCTD	exp1	2h	29	3337.92	358.072	352.437
22	23	2hIR	181112	3	dDBDdCTD	exp1	2h	9	1392.39	577.021	239.499
23	1	8hIR	181112	3	dDBDdCTD	exp1	8h	1	761.341	153.196	88.9444
23	2	8hIR	181112	3	dDBDdCTD	exp1	8h	1	931.557	212.98	93.2153
23	3	8hIR	181112	3	dDBDdCTD	exp1	8h	7	1581.05	338.823	186.587
23	4	8hIR	181112	3	dDBDdCTD	exp1	8h	10	1652.77	296.169	170.953
23	5	8hIR	181112	3	dDBDdCTD	exp1	8h	26	1528.59	315.377	191.364
23	6	8hIR	181112	3	dDBDdCTD	exp1	8h	31	1688.44	304.683	256.149
23	7	8hIR	181112	3	dDBDdCTD	exp1	8h	9	1759.39	688.76	325.7
23	8	8hIR	181112	3	dDBDdCTD	exp1	8h	21	1905.42	353.961	211.285
23	9	8hIR	181112	3	dDBDdCTD	exp1	8h	0	1677.69	453.655	239.18
23	10	8hIR	181112	3	dDBDdCTD	exp1	8h	16	1671.52	795.871	201.945
23	11	8hIR	181112	3	dDBDdCTD	exp1	8h	0	1089.07	209.086	103.894
23	12	8hIR	181112	3	dDBDdCTD	exp1	8h	31	1907.29	344.775	208.263
23	13	8hIR	181112	3	dDBDdCTD	exp1	8h	18	1913.57	496.932	186.109
23	14	8hIR	181112	3	dDBDdCTD	exp1	8h	37	1458.65	4106.5	214.558
23	15	8hIR	181112	3	dDBDdCTD	exp1	8h	3	1640.83	270.831	148.484
23	16	8hIR	181112	3	dDBDdCTD	exp1	8h	8	1355.26	1737.12	144.505
23	17	8hIR	181112	3	dDBDdCTD	exp1	8h	0	1913.21	306.712	149.777
23	18	8hIR	181112	3	dDBDdCTD	exp1	8h	27	2200.15	339.517	233.416
23	19	8hIR	181112	3	dDBDdCTD	exp1	8h	33	3145.62	916.547	414.424
23	20	8hIR	181112	3	dDBDdCTD	exp1	8h	7	2398.91	405.204	249.259
23	21	8hIR	181112	3	dDBDdCTD	exp1	8h	17	2009.73	274.357	176.126
23	22	8hIR	181112	3	dDBDdCTD	exp1	8h	16	1005.15	781.742	187.476
23	23	8hIR	181112	3	dDBDdCTD	exp1	8h	23	1811.24	454.631	230.794
23	24	8hIR	181112	3	dDBDdCTD	exp1	8h	6	2096.81	309.963	166.472
23	25	8hIR	181112	3	dDBDdCTD	exp1	8h	27	1615.5	5548.58	201.042
23	26	8hIR	181112	3	dDBDdCTD	exp1	8h	4	2356.9	377.478	200.567
23	27	8hIR	181112	3	dDBDdCTD	exp1	8h	34	1432.75	4816.33	195.492
23	28	8hIR	181112	3	dDBDdCTD	exp1	8h	20	2077.52	433.172	283.852
23	29	8hIR	181112	3	dDBDdCTD	exp1	8h	21	3464.54	663.404	357.565
23	30	8hIR	181112	3	dDBDdCTD	exp1	8h	25	2518.32	370.68	268.735
23	31	8hIR	181112	3	dDBDdCTD	exp1	8h	6	2308.29	330.224	190.454
23	32	8hIR	181112	3	dDBDdCTD	exp1	8h	9	1224.69	436.808	153.325
23	33	8hIR	181112	3	dDBDdCTD	exp1	8h	0	2289.47	245.232	120.296
23	34	8hIR	181112	3	dDBDdCTD	exp1	8h	13	2234.53	486.338	299.828
23	35	8hIR	181112	3	dDBDdCTD	exp1	8h	12	2094.69	1569.44	146.134
23	36	8hIR	181112	3	dDBDdCTD	exp1	8h	0	1304.14	177.605	86.6565
23	37	8hIR	181112	3	dDBDdCTD	exp1	8h	9	1294.05	152.759	147.067
23	38	8hIR	181112	3	dDBDdCTD	exp1	8h	3	2645.02	433.116	211.082
23	39	8hIR	181112	3	dDBDdCTD	exp1	8h	7	1360.89	188.11	115.237
23	40	8hIR	181112	3	dDBDdCTD	exp1	8h	6	2179.46	411.54	226.248
23	41	8hIR	181112	3	dDBDdCTD	exp1	8h	29	2191.35	338.895	246.197
23	42	8hIR	181112	3	dDBDdCTD	exp1	8h	47	2878.56	517.409	316.013
23	43	8hIR	181112	3	dDBDdCTD	exp1	8h	0	1214.44	163	79.9476
23	44	8hIR	181112	3	dDBDdCTD	exp1	8h	34	2854.84	471.849	314.269
23	45	8hIR	181112	3	dDBDdCTD	exp1	8h	5	2800.01	328.582	187.472
23	46	8hIR	181112	3	dDBDdCTD	exp1	8h	23	1426.82	251.087	198.139
23	47	8hIR	181112	3	dDBDdCTD	exp1	8h	10	1332.48	207.692	129.96
23	48	8hIR	181112	3	dDBDdCTD	exp1	8h	35	2462.38	375.078	267.973
23	49	8hIR	181112	3	dDBDdCTD	exp1	8h	16	2113.69	353.389	199.944
23	50	8hIR	181112	3	dDBDdCTD	exp1	8h	21	1511.07	2970.77	252.482
23	51	8hIR	181112	3	dDBDdCTD	exp1	8h	6	897.834	188.708	100.123
23	52	8hIR	181112	3	dDBDdCTD	exp1	8h	19	2748.19	347.351	226.714
23	53	8hIR	181112	3	dDBDdCTD	exp1	8h	0	2276.96	227.261	115.386
23	54	8hIR	181112	3	dDBDdCTD	exp1	8h	18	2903.61	386.923	228.629
23	55	8hIR	181112	3	dDBDdCTD	exp1	8h	25	2292.36	347.681	213.884
23	56	8hIR	181112	3	dDBDdCTD	exp1	8h	13	903.623	1634.99	109.837
23	57	8hIR	181112	3	dDBDdCTD	exp1	8h	19	1716.52	3011.08	216.371
23	58	8hIR	181112	3	dDBDdCTD	exp1	8h	13	3759.89	2894.37	390.296
23	59	8hIR	181112	3	dDBDdCTD	exp1	8h	1	1183.22	205.883	92.5031
23	60	8hIR	181112	3	dDBDdCTD	exp1	8h	1	683.282	703.78	124.838
24	1	2hIR	181112	4	WT	exp1	2h	26	3325.04	2110.74	473.157
24	2	2hIR	181112	4	WT	exp1	2h	39	1898.64	1869.11	423.491
24	3	2hIR	181112	4	WT	exp1	2h	0	1849.76	267.419	133.76
24	4	2hIR	181112	4	WT	exp1	2h	17	965.809	783.755	275.175
24	5	2hIR	181112	4	WT	exp1	2h	64	3743.29	2659.54	788.495
24	6	2hIR	181112	4	WT	exp1	2h	9	3329.52	1696.6	380.537
24	7	2hIR	181112	4	WT	exp1	2h	29	3862.37	1836.48	447.293
24	8	2hIR	181112	4	WT	exp1	2h	69	3185.51	2790.5	815.124
24	9	2hIR	181112	4	WT	exp1	2h	22	2972.86	326.929	388.217
24	10	2hIR	181112	4	WT	exp1	2h	39	2150.81	1440.62	458.911
24	11	2hIR	181112	4	WT	exp1	2h	17	3940.52	1803.98	385.189
24	12	2hIR	181112	4	WT	exp1	2h	31	1859.59	1775.73	358.307
24	13	2hIR	181112	4	WT	exp1	2h	22	3518.11	327.843	306.918
24	14	2hIR	181112	4	WT	exp1	2h	56	3596.89	551.129	681.744
24	15	2hIR	181112	4	WT	exp1	2h	6	4026.78	960.378	320.55
24	16	2hIR	181112	4	WT	exp1	2h	16	1658.34	1072.37	243.73
24	17	2hIR	181112	4	WT	exp1	2h	13	2522.63	572.223	198.413
24	18	2hIR	181112	4	WT	exp1	2h	7	508.625	353.055	108.313
24	19	2hIR	181112	4	WT	exp1	2h	75	9058.65	3812.45	1175.22
24	20	2hIR	181112	4	WT	exp1	2h	22	1904.89	1611.89	283.632
24	21	2hIR	181112	4	WT	exp1	2h	56	2784.72	1192.07	577.191
24	22	2hIR	181112	4	WT	exp1	2h	52	2694.87	1538.22	604.153
24	23	2hIR	181112	4	WT	exp1	2h	12	1737.16	1141.3	230.346
24	24	2hIR	181112	4	WT	exp1	2h	46	2318.2	1463.43	489.381
24	25	2hIR	181112	4	WT	exp1	2h	49	2000.26	995.744	523.572
24	26	2hIR	181112	4	WT	exp1	2h	22	4560.23	1835.2	396.157
24	27	2hIR	181112	4	WT	exp1	2h	23	4421.38	1687.9	392.467
24	28	2hIR	181112	4	WT	exp1	2h	42	2012.06	907.251	456.88
24	29	2hIR	181112	4	WT	exp1	2h	20	3481.84	382.68	414.429
24	30	2hIR	181112	4	WT	exp1	2h	54	3810.36	511.511	734.268
24	31	2hIR	181112	4	WT	exp1	2h	40	2157.67	1021.5	561.918
24	32	2hIR	181112	4	WT	exp1	2h	1	2225.25	829.368	146.812
24	33	2hIR	181112	4	WT	exp1	2h	3	3983.09	366.886	272.709
24	34	2hIR	181112	4	WT	exp1	2h	58	3110.61	1164.82	658.621
24	35	2hIR	181112	4	WT	exp1	2h	67	3976.79	2967.62	789.273
24	36	2hIR	181112	4	WT	exp1	2h	43	2008.33	1305.39	440.149
24	37	2hIR	181112	4	WT	exp1	2h	44	1890.86	1413.25	460.315
24	38	2hIR	181112	4	WT	exp1	2h	1	2303.68	785.34	147.14
24	39	2hIR	181112	4	WT	exp1	2h	46	2315.89	1603.67	505.555
25	1	8hIR	181112	4	WT	exp1	8h	2	3169.3	511.474	323.683
25	2	8hIR	181112	4	WT	exp1	8h	1	4425.32	683.148	339.046
25	3	8hIR	181112	4	WT	exp1	8h	2	1545.95	277.132	186.758
25	4	8hIR	181112	4	WT	exp1	8h	3	1574.82	266.392	172.949
25	5	8hIR	181112	4	WT	exp1	8h	10	1590.72	257.039	186.523
25	6	8hIR	181112	4	WT	exp1	8h	11	1760.93	254.619	204.661
25	7	8hIR	181112	4	WT	exp1	8h	9	2133.56	270.618	205.016
25	8	8hIR	181112	4	WT	exp1	8h	27	1858.43	3289.35	224
25	9	8hIR	181112	4	WT	exp1	8h	36	1889.06	2707.37	238.16
25	10	8hIR	181112	4	WT	exp1	8h	1	1185.36	140.208	97.3092
25	11	8hIR	181112	4	WT	exp1	8h	16	3199.16	407.586	532.701
25	12	8hIR	181112	4	WT	exp1	8h	22	3313.91	2475.32	524.252
25	13	8hIR	181112	4	WT	exp1	8h	24	2532.74	2353.63	268.791
25	14	8hIR	181112	4	WT	exp1	8h	0	1199.36	188.309	89.6781
25	15	8hIR	181112	4	WT	exp1	8h	19	2315.65	291.782	218.254
25	16	8hIR	181112	4	WT	exp1	8h	4	3980.81	451.266	297.854
25	17	8hIR	181112	4	WT	exp1	8h	11	2075.64	232.804	175.959
25	18	8hIR	181112	4	WT	exp1	8h	22	4069.43	1467.53	492.305
25	19	8hIR	181112	4	WT	exp1	8h	31	4086.65	1518.42	511.202
25	20	8hIR	181112	4	WT	exp1	8h	4	2278.66	963.184	211.243
25	21	8hIR	181112	4	WT	exp1	8h	37	4234.15	856.535	500.289
25	22	8hIR	181112	4	WT	exp1	8h	3	4877.34	500.704	279.051
25	23	8hIR	181112	4	WT	exp1	8h	44	4867.79	3665.45	631.389
25	24	8hIR	181112	4	WT	exp1	8h	7	930.7	776.677	81.0299
25	25	8hIR	181112	4	WT	exp1	8h	11	2305.14	1112.66	200.621
25	26	8hIR	181112	4	WT	exp1	8h	30	4270.47	2627.6	453.704
25	27	8hIR	181112	4	WT	exp1	8h	9	1364.16	198.724	125.82
25	28	8hIR	181112	4	WT	exp1	8h	4	2431.71	239.473	168.952
26	1	2hIR	181112	4	dCTD	exp1	2h	1	2250.18	378.087	230.387
26	2	2hIR	181112	4	dCTD	exp1	2h	38	1856.07	1607.79	275.646
26	3	2hIR	181112	4	dCTD	exp1	2h	32	1322.26	1467.52	256.842
26	4	2hIR	181112	4	dCTD	exp1	2h	36	2184.1	737.543	295.371
26	5	2hIR	181112	4	dCTD	exp1	2h	15	1142.72	1516.21	163.553
26	6	2hIR	181112	4	dCTD	exp1	2h	27	1422.79	1412.04	218.436
26	7	2hIR	181112	4	dCTD	exp1	2h	17	1155.2	1236.58	183.862
26	8	2hIR	181112	4	dCTD	exp1	2h	16	1507.69	705.26	146.822
26	9	2hIR	181112	4	dCTD	exp1	2h	0	1200.46	153.701	89.0745
26	10	2hIR	181112	4	dCTD	exp1	2h	18	1421.94	1617.18	182.858
26	11	2hIR	181112	4	dCTD	exp1	2h	38	1669.59	1125.49	238.923
26	12	2hIR	181112	4	dCTD	exp1	2h	38	2357.23	745.644	282.025
26	13	2hIR	181112	4	dCTD	exp1	2h	0	968.656	117.656	70.8257
26	14	2hIR	181112	4	dCTD	exp1	2h	25	2406.78	371.554	303.915
26	15	2hIR	181112	4	dCTD	exp1	2h	35	2458.08	432.762	301.907
26	16	2hIR	181112	4	dCTD	exp1	2h	34	2041.68	679.551	263.721
26	17	2hIR	181112	4	dCTD	exp1	2h	52	2459.28	1396.1	389.021
26	18	2hIR	181112	4	dCTD	exp1	2h	36	1752.48	1301.43	277.79
26	19	2hIR	181112	4	dCTD	exp1	2h	39	1846.6	1071.75	339.328
26	20	2hIR	181112	4	dCTD	exp1	2h	47	2286.46	527.797	375.743
26	21	2hIR	181112	4	dCTD	exp1	2h	23	2102.3	1235.08	288.956
26	22	2hIR	181112	4	dCTD	exp1	2h	50	3332.45	1710.83	433.346
26	23	2hIR	181112	4	dCTD	exp1	2h	59	2226.63	839.708	484.979
26	24	2hIR	181112	4	dCTD	exp1	2h	36	2484.37	930.119	285.844
26	25	2hIR	181112	4	dCTD	exp1	2h	2	1236.51	979.116	130.83
26	26	2hIR	181112	4	dCTD	exp1	2h	28	2381.31	578.829	306.818
26	27	2hIR	181112	4	dCTD	exp1	2h	41	1783.24	989.147	344.229
26	28	2hIR	181112	4	dCTD	exp1	2h	34	2528.31	491.726	297.092
26	29	2hIR	181112	4	dCTD	exp1	2h	36	2914.4	1165.18	319.091
26	30	2hIR	181112	4	dCTD	exp1	2h	9	1365.22	1235.07	145.767
26	31	2hIR	181112	4	dCTD	exp1	2h	15	2721.2	510.369	202.46
26	32	2hIR	181112	4	dCTD	exp1	2h	15	1096.86	856.24	156.408
26	33	2hIR	181112	4	dCTD	exp1	2h	0	2555.55	319.831	196.383
26	34	2hIR	181112	4	dCTD	exp1	2h	30	2711.37	288.149	296.354
26	35	2hIR	181112	4	dCTD	exp1	2h	38	2613.48	440.166	352.979
26	36	2hIR	181112	4	dCTD	exp1	2h	1	2506.11	241.908	148.516
26	37	2hIR	181112	4	dCTD	exp1	2h	0	1097.15	691.41	103.222
26	38	2hIR	181112	4	dCTD	exp1	2h	14	698.441	739.747	113.124
26	39	2hIR	181112	4	dCTD	exp1	2h	41	2579.17	405.383	308.395
26	40	2hIR	181112	4	dCTD	exp1	2h	38	1869.73	1134.24	336.513
26	41	2hIR	181112	4	dCTD	exp1	2h	11	711.863	618.323	101.467
26	42	2hIR	181112	4	dCTD	exp1	2h	38	2447.81	1570.23	318.944
26	43	2hIR	181112	4	dCTD	exp1	2h	7	1144.92	1153.53	138.593
26	44	2hIR	181112	4	dCTD	exp1	2h	31	2521.64	250.816	260.105
26	45	2hIR	181112	4	dCTD	exp1	2h	26	2682.31	721.926	292.257
26	46	2hIR	181112	4	dCTD	exp1	2h	7	934.502	414.455	104.534
27	1	8hIR	181112	4	dCTD	exp1	8h	0	2604.12	435.186	226.62
27	2	8hIR	181112	4	dCTD	exp1	8h	29	2923.8	476.973	405.864
27	3	8hIR	181112	4	dCTD	exp1	8h	13	3672.07	491.428	303.78
27	4	8hIR	181112	4	dCTD	exp1	8h	4	1089.3	148.864	84.5122
27	5	8hIR	181112	4	dCTD	exp1	8h	6	364.581	221.434	68.0694
27	6	8hIR	181112	4	dCTD	exp1	8h	18	2780.18	388.194	292.267
27	7	8hIR	181112	4	dCTD	exp1	8h	4	3160.08	381.1	221.78
27	8	8hIR	181112	4	dCTD	exp1	8h	24	2173.97	326.163	197.356
27	9	8hIR	181112	4	dCTD	exp1	8h	6	595.045	123.658	58.0529
27	10	8hIR	181112	4	dCTD	exp1	8h	30	2584.59	828.129	268.393
27	11	8hIR	181112	4	dCTD	exp1	8h	3	3340.21	404.547	222.765
27	12	8hIR	181112	4	dCTD	exp1	8h	0	1269.57	166.668	85.43
27	13	8hIR	181112	4	dCTD	exp1	8h	10	1958.41	355.97	145.123
27	14	8hIR	181112	4	dCTD	exp1	8h	16	3341.15	355.571	250.033
27	15	8hIR	181112	4	dCTD	exp1	8h	24	4349.42	444.56	319.778
27	16	8hIR	181112	4	dCTD	exp1	8h	16	3262.61	311.127	180.998
27	17	8hIR	181112	4	dCTD	exp1	8h	2	3156.68	330.387	182.873
27	18	8hIR	181112	4	dCTD	exp1	8h	1	3718.4	433.151	232.983
27	19	8hIR	181112	4	dCTD	exp1	8h	29	5013.27	632.085	351.539
27	20	8hIR	181112	4	dCTD	exp1	8h	66	3856.37	459.903	381.246
27	21	8hIR	181112	4	dCTD	exp1	8h	12	3315.65	320.882	196.674
27	22	8hIR	181112	4	dCTD	exp1	8h	36	2616.58	277.713	235.552
27	23	8hIR	181112	4	dCTD	exp1	8h	4	3517.74	407.614	241.18
27	24	8hIR	181112	4	dCTD	exp1	8h	5	3281.18	317.671	194.163
27	25	8hIR	181112	4	dCTD	exp1	8h	4	1187.14	140.608	74.9048
27	26	8hIR	181112	4	dCTD	exp1	8h	14	4666.31	464.418	290.497
27	27	8hIR	181112	4	dCTD	exp1	8h	26	8563.04	1225.3	594.235
27	28	8hIR	181112	4	dCTD	exp1	8h	3	3838.28	490.192	277.965
27	29	8hIR	181112	4	dCTD	exp1	8h	35	2288.3	1728.02	270.342
27	30	8hIR	181112	4	dCTD	exp1	8h	0	3989.98	367.005	185.636
27	31	8hIR	181112	4	dCTD	exp1	8h	28	3239.48	368.341	238.721
27	32	8hIR	181112	4	dCTD	exp1	8h	32	2962.2	617.157	235.882
27	33	8hIR	181112	4	dCTD	exp1	8h	16	2170.79	304.982	192.757
28	1	2hIR	181112	4	dDBD	exp1	2h	27	975.991	669.6	203.133
28	2	2hIR	181112	4	dDBD	exp1	2h	13	1038.6	568.38	149.455
28	3	2hIR	181112	4	dDBD	exp1	2h	25	1824.61	308.115	253.118
28	4	2hIR	181112	4	dDBD	exp1	2h	27	1319.22	503.434	238.282
28	5	2hIR	181112	4	dDBD	exp1	2h	16	892.106	132.035	150.115
28	6	2hIR	181112	4	dDBD	exp1	2h	12	982.145	613.331	139.98
28	7	2hIR	181112	4	dDBD	exp1	2h	31	1962.11	383.999	321
28	8	2hIR	181112	4	dDBD	exp1	2h	8	610.187	240.808	111.217
28	9	2hIR	181112	4	dDBD	exp1	2h	24	2425.41	313.539	290.172
28	10	2hIR	181112	4	dDBD	exp1	2h	59	2033.93	1026.36	410.383
28	11	2hIR	181112	4	dDBD	exp1	2h	42	1718.74	962.674	316.806
28	12	2hIR	181112	4	dDBD	exp1	2h	33	2636.98	288.306	300.726
28	13	2hIR	181112	4	dDBD	exp1	2h	45	3030.26	711.667	395.72
28	14	2hIR	181112	4	dDBD	exp1	2h	45	2638.59	393.458	386.457
28	15	2hIR	181112	4	dDBD	exp1	2h	47	2355.44	992.421	385.736
28	16	2hIR	181112	4	dDBD	exp1	2h	54	2962.45	793.662	423.02
28	17	2hIR	181112	4	dDBD	exp1	2h	40	2521.8	587.64	388.919
28	18	2hIR	181112	4	dDBD	exp1	2h	0	1462.8	106.792	59.6982
28	19	2hIR	181112	4	dDBD	exp1	2h	38	3125.06	395.754	414.149
28	20	2hIR	181112	4	dDBD	exp1	2h	33	2373.99	632.503	307.067
28	21	2hIR	181112	4	dDBD	exp1	2h	29	1552.74	501.749	275.728
28	22	2hIR	181112	4	dDBD	exp1	2h	15	1319.84	355.257	139.647
28	23	2hIR	181112	4	dDBD	exp1	2h	39	2109.46	1255.45	285.852
28	24	2hIR	181112	4	dDBD	exp1	2h	24	2000.55	1280.01	205.386
28	25	2hIR	181112	4	dDBD	exp1	2h	36	2552.35	326.147	358.877
28	26	2hIR	181112	4	dDBD	exp1	2h	52	2001.88	635.343	430.836
28	27	2hIR	181112	4	dDBD	exp1	2h	34	1789.67	1222.73	262.401
28	28	2hIR	181112	4	dDBD	exp1	2h	11	1923.38	965.101	171.728
28	29	2hIR	181112	4	dDBD	exp1	2h	27	1267.91	752.142	247.85
29	1	8hIR	181112	4	dDBD	exp1	8h	19	2253.79	737.21	347.908
29	2	8hIR	181112	4	dDBD	exp1	8h	0	1986.6	410.652	147.418
29	3	8hIR	181112	4	dDBD	exp1	8h	27	1712.7	2972.43	234.564
29	4	8hIR	181112	4	dDBD	exp1	8h	29	1708.02	3222.77	281.028
29	5	8hIR	181112	4	dDBD	exp1	8h	45	4759.67	761.478	688.277
29	6	8hIR	181112	4	dDBD	exp1	8h	26	1851.37	3230.04	310.352
29	7	8hIR	181112	4	dDBD	exp1	8h	31	2744.34	1199.9	396.461
29	8	8hIR	181112	4	dDBD	exp1	8h	8	1591.77	1153.67	174.527
29	9	8hIR	181112	4	dDBD	exp1	8h	86	3006.83	12027	604.845
29	10	8hIR	181112	4	dDBD	exp1	8h	23	2120.38	2887.82	278.361
29	11	8hIR	181112	4	dDBD	exp1	8h	2	1541.69	1237.72	96.5257
29	12	8hIR	181112	4	dDBD	exp1	8h	1	1412.09	1861.06	82.8626
29	13	8hIR	181112	4	dDBD	exp1	8h	31	2026.21	5700.55	267.53
29	14	8hIR	181112	4	dDBD	exp1	8h	0	2165.7	292.652	187.255
29	15	8hIR	181112	4	dDBD	exp1	8h	23	3716.96	464.667	381.51
29	16	8hIR	181112	4	dDBD	exp1	8h	69	3199.97	12156	500.271
29	17	8hIR	181112	4	dDBD	exp1	8h	1	1567.88	175.32	116.348
29	18	8hIR	181112	4	dDBD	exp1	8h	17	1838.82	178.278	239.153
29	19	8hIR	181112	4	dDBD	exp1	8h	1	4288.23	481.465	323.994
29	20	8hIR	181112	4	dDBD	exp1	8h	0	861.835	370.944	50.9164
29	21	8hIR	181112	4	dDBD	exp1	8h	0	3151.54	286.272	172.164
29	22	8hIR	181112	4	dDBD	exp1	8h	19	2797.64	640.429	306.177
29	23	8hIR	181112	4	dDBD	exp1	8h	0	1088.66	78.9561	46.4211
29	24	8hIR	181112	4	dDBD	exp1	8h	1	1050.51	75.3433	46.6611
29	25	8hIR	181112	4	dDBD	exp1	8h	0	2366.18	238.68	169.327
29	26	8hIR	181112	4	dDBD	exp1	8h	13	3156.43	355.547	287.615
29	27	8hIR	181112	4	dDBD	exp1	8h	16	2763.68	1250.16	251.866
29	28	8hIR	181112	4	dDBD	exp1	8h	8	2983.66	269.573	213.999
29	29	8hIR	181112	4	dDBD	exp1	8h	24	2982.57	593.461	282.58
29	30	8hIR	181112	4	dDBD	exp1	8h	5	3421.46	338.417	237.867
29	31	8hIR	181112	4	dDBD	exp1	8h	14	3277.27	258.141	218.284
29	32	8hIR	181112	4	dDBD	exp1	8h	19	3032.66	274.561	282.715
29	33	8hIR	181112	4	dDBD	exp1	8h	27	3402.89	1169.18	366.481
29	34	8hIR	181112	4	dDBD	exp1	8h	34	2938.41	856.239	362.566
29	35	8hIR	181112	4	dDBD	exp1	8h	27	3542.09	875.037	341.076
29	36	8hIR	181112	4	dDBD	exp1	8h	2	3411.31	406.003	268.418
29	37	8hIR	181112	4	dDBD	exp1	8h	0	2787.61	276.897	167.937
29	38	8hIR	181112	4	dDBD	exp1	8h	7	3483.8	349.223	242.606
29	39	8hIR	181112	4	dDBD	exp1	8h	35	2883.84	1705.06	389.557
29	40	8hIR	181112	4	dDBD	exp1	8h	13	2532.71	1754.55	170.924
29	41	8hIR	181112	4	dDBD	exp1	8h	25	2498.71	1932.81	254.679
29	42	8hIR	181112	4	dDBD	exp1	8h	11	1989.18	908.919	187.249
29	43	8hIR	181112	4	dDBD	exp1	8h	21	1577.3	711.043	214.468
30	1	2hIR	181112	4	dDBDdCTD	exp1	2h	1	1043.78	258.48	143.639
30	2	2hIR	181112	4	dDBDdCTD	exp1	2h	57	1772.57	863.665	427.081
30	3	2hIR	181112	4	dDBDdCTD	exp1	2h	49	1924.15	971.242	358.245
30	4	2hIR	181112	4	dDBDdCTD	exp1	2h	6	796.848	588.251	120.964
30	5	2hIR	181112	4	dDBDdCTD	exp1	2h	19	1760.52	600.096	255.957
30	6	2hIR	181112	4	dDBDdCTD	exp1	2h	20	1743.95	311.714	269.332
30	7	2hIR	181112	4	dDBDdCTD	exp1	2h	59	2236.73	774.847	429.463
30	8	2hIR	181112	4	dDBDdCTD	exp1	2h	3	1140.11	196.239	170.118
30	9	2hIR	181112	4	dDBDdCTD	exp1	2h	50	1593.21	767.794	374.26
30	10	2hIR	181112	4	dDBDdCTD	exp1	2h	43	2003.81	981.546	373.78
30	11	2hIR	181112	4	dDBDdCTD	exp1	2h	32	1434.08	526.802	231.545
30	12	2hIR	181112	4	dDBDdCTD	exp1	2h	16	1542.62	175.971	203.83
30	13	2hIR	181112	4	dDBDdCTD	exp1	2h	53	2534.72	1326.54	446.032
30	14	2hIR	181112	4	dDBDdCTD	exp1	2h	27	1456.51	374.36	190.693
30	15	2hIR	181112	4	dDBDdCTD	exp1	2h	49	2044.57	696.019	371.183
30	16	2hIR	181112	4	dDBDdCTD	exp1	2h	14	1533.08	369.532	163.372
30	17	2hIR	181112	4	dDBDdCTD	exp1	2h	7	1503.99	312.9	194.038
30	18	2hIR	181112	4	dDBDdCTD	exp1	2h	1	1621.24	389.572	177.356
30	19	2hIR	181112	4	dDBDdCTD	exp1	2h	32	1410.89	429.774	220.589
30	20	2hIR	181112	4	dDBDdCTD	exp1	2h	54	2210.34	762.173	444.915
30	21	2hIR	181112	4	dDBDdCTD	exp1	2h	7	1592.97	161.79	177.398
30	22	2hIR	181112	4	dDBDdCTD	exp1	2h	26	1973.39	771.685	248.59
30	23	2hIR	181112	4	dDBDdCTD	exp1	2h	2	2283.99	347.442	330.019
30	24	2hIR	181112	4	dDBDdCTD	exp1	2h	4	2942.78	355.758	375.776
30	25	2hIR	181112	4	dDBDdCTD	exp1	2h	37	1905.18	750.975	321.829
30	26	2hIR	181112	4	dDBDdCTD	exp1	2h	53	1472.69	1179.47	363.5
30	27	2hIR	181112	4	dDBDdCTD	exp1	2h	42	3997.37	764.257	546.237
30	28	2hIR	181112	4	dDBDdCTD	exp1	2h	20	3793.24	397.951	442.429
30	29	2hIR	181112	4	dDBDdCTD	exp1	2h	5	1872.22	543.831	206.973
30	30	2hIR	181112	4	dDBDdCTD	exp1	2h	9	1242.54	441.234	168.76
30	31	2hIR	181112	4	dDBDdCTD	exp1	2h	19	1977.96	622.7	224.715
30	32	2hIR	181112	4	dDBDdCTD	exp1	2h	18	1401.97	496.425	200.536
30	33	2hIR	181112	4	dDBDdCTD	exp1	2h	14	1605.94	930.838	220.608
30	34	2hIR	181112	4	dDBDdCTD	exp1	2h	0	2203.02	343.606	309.713
30	35	2hIR	181112	4	dDBDdCTD	exp1	2h	31	1127.33	786.078	261.896
30	36	2hIR	181112	4	dDBDdCTD	exp1	2h	25	2502.09	241.876	305.022
30	37	2hIR	181112	4	dDBDdCTD	exp1	2h	36	3788.51	419.183	505.291
30	38	2hIR	181112	4	dDBDdCTD	exp1	2h	54	2213.8	881.134	366.738
30	39	2hIR	181112	4	dDBDdCTD	exp1	2h	30	1983.24	864.09	314.359
30	40	2hIR	181112	4	dDBDdCTD	exp1	2h	6	2086.39	671.541	263.486
31	1	8hIR	181112	4	dDBDdCTD	exp1	8h	0	1067.97	265.083	132.274
31	2	8hIR	181112	4	dDBDdCTD	exp1	8h	13	1310.56	250.085	159.957
31	3	8hIR	181112	4	dDBDdCTD	exp1	8h	0	2094.47	367.804	186.527
31	4	8hIR	181112	4	dDBDdCTD	exp1	8h	39	4311.96	1436.24	495.54
31	5	8hIR	181112	4	dDBDdCTD	exp1	8h	0	976.942	206.941	107.501
31	6	8hIR	181112	4	dDBDdCTD	exp1	8h	50	2386.28	460.73	419.13
31	7	8hIR	181112	4	dDBDdCTD	exp1	8h	24	2313.47	341.814	248.719
31	8	8hIR	181112	4	dDBDdCTD	exp1	8h	12	2374.77	366.096	254.504
31	9	8hIR	181112	4	dDBDdCTD	exp1	8h	28	2056.1	405.753	288.207
31	10	8hIR	181112	4	dDBDdCTD	exp1	8h	23	1774.96	813.207	235.54
31	11	8hIR	181112	4	dDBDdCTD	exp1	8h	9	2155.08	279.482	179.766
31	12	8hIR	181112	4	dDBDdCTD	exp1	8h	26	2373.63	315.179	237.042
31	13	8hIR	181112	4	dDBDdCTD	exp1	8h	1	2414.59	413.02	211.197
31	14	8hIR	181112	4	dDBDdCTD	exp1	8h	13	2501.71	369.368	244.037
31	15	8hIR	181112	4	dDBDdCTD	exp1	8h	20	2384.03	292.072	200.882
31	16	8hIR	181112	4	dDBDdCTD	exp1	8h	19	2868.94	339.993	238.286
31	17	8hIR	181112	4	dDBDdCTD	exp1	8h	25	2417.84	498.67	306.397
31	18	8hIR	181112	4	dDBDdCTD	exp1	8h	31	2264.72	322.723	266.101
31	19	8hIR	181112	4	dDBDdCTD	exp1	8h	20	2462.61	308.855	220.34
31	20	8hIR	181112	4	dDBDdCTD	exp1	8h	26	2905.88	342.157	247.162
31	21	8hIR	181112	4	dDBDdCTD	exp1	8h	19	2828.45	447.697	595.492
31	22	8hIR	181112	4	dDBDdCTD	exp1	8h	7	2900.97	375.353	228.677
31	23	8hIR	181112	4	dDBDdCTD	exp1	8h	51	2814.93	469.577	398.626
31	24	8hIR	181112	4	dDBDdCTD	exp1	8h	3	2853.92	428.379	227.584
31	25	8hIR	181112	4	dDBDdCTD	exp1	8h	10	2017.33	1497.59	149.179
31	26	8hIR	181112	4	dDBDdCTD	exp1	8h	37	4518.1	1112.4	457.384
31	27	8hIR	181112	4	dDBDdCTD	exp1	8h	39	2687.79	448.604	317.164
31	28	8hIR	181112	4	dDBDdCTD	exp1	8h	24	3261.47	568.731	331.982
31	29	8hIR	181112	4	dDBDdCTD	exp1	8h	2	1162.45	184.069	112.682
31	30	8hIR	181112	4	dDBDdCTD	exp1	8h	36	3427.93	510.98	357.86
31	31	8hIR	181112	4	dDBDdCTD	exp1	8h	17	2578.36	293.329	212.177
31	32	8hIR	181112	4	dDBDdCTD	exp1	8h	8	1518.16	231.08	151.474
31	33	8hIR	181112	4	dDBDdCTD	exp1	8h	20	2064.37	258.305	218.437
31	34	8hIR	181112	4	dDBDdCTD	exp1	8h	37	1763.97	3099.15	229.511
31	35	8hIR	181112	4	dDBDdCTD	exp1	8h	7	2921.12	555.245	314.669
31	36	8hIR	181112	4	dDBDdCTD	exp1	8h	18	3171.02	538.43	303.884
31	37	8hIR	181112	4	dDBDdCTD	exp1	8h	26	4280.13	625.574	425.391
32	1	noIR	181112	1	WT	exp1	no IR	0	886.111	213.297	117.1
32	2	noIR	181112	1	WT	exp1	no IR	18	1578	1246.64	245.351
32	3	noIR	181112	1	WT	exp1	no IR	17	1817.31	1050.07	256.325
32	4	noIR	181112	1	WT	exp1	no IR	16	989.964	733.493	180.784
32	5	noIR	181112	1	WT	exp1	no IR	9	1425.89	805.129	213.815
32	6	noIR	181112	1	WT	exp1	no IR	14	1532.07	1199.45	218.636
32	7	noIR	181112	1	WT	exp1	no IR	10	1384.25	246.295	210.308
32	8	noIR	181112	1	WT	exp1	no IR	18	1650.92	1006.97	266.416
32	9	noIR	181112	1	WT	exp1	no IR	19	1443.66	1137.7	201.39
32	10	noIR	181112	1	WT	exp1	no IR	0	885.158	194.247	95.1584
32	11	noIR	181112	1	WT	exp1	no IR	15	1914.93	1231.84	210.744
32	12	noIR	181112	1	WT	exp1	no IR	12	1869.12	919.072	217.042
32	13	noIR	181112	1	WT	exp1	no IR	7	2575	499.004	225.477
32	14	noIR	181112	1	WT	exp1	no IR	0	1832.15	366.167	168.823
32	15	noIR	181112	1	WT	exp1	no IR	21	1512.01	1632.91	217.665
32	16	noIR	181112	1	WT	exp1	no IR	9	1194.88	1224.41	127.212
32	17	noIR	181112	1	WT	exp1	no IR	5	610.93	635.891	78.3252
32	18	noIR	181112	1	WT	exp1	no IR	23	1401.91	1598.13	204.017
32	19	noIR	181112	1	WT	exp1	no IR	28	1344.92	1621.15	212.398
32	20	noIR	181112	1	WT	exp1	no IR	18	1512.72	1901.51	209.898
32	21	noIR	181112	1	WT	exp1	no IR	23	1535.25	1221.12	221.336
32	22	noIR	181112	1	WT	exp1	no IR	21	1930.09	1262.57	204.097
32	23	noIR	181112	1	WT	exp1	no IR	24	1774.89	1921.59	254.298
32	24	noIR	181112	1	WT	exp1	no IR	17	2037.84	463.846	513.34
32	25	noIR	181112	1	WT	exp1	no IR	20	1578.79	1307.46	207.705
32	26	noIR	181112	1	WT	exp1	no IR	29	1364.72	2179.23	241.99
32	27	noIR	181112	1	WT	exp1	no IR	21	1635.2	2003.61	241.32
32	28	noIR	181112	1	WT	exp1	no IR	20	1463.97	1572.84	199.383
32	29	noIR	181112	1	WT	exp1	no IR	5	1202.55	1216.56	127.391
32	30	noIR	181112	1	WT	exp1	no IR	13	593.964	999.975	95.5572
32	31	noIR	181112	1	WT	exp1	no IR	13	831.377	1268.28	126.693
32	32	noIR	181112	1	WT	exp1	no IR	0	1189.3	151.553	92.6452
32	33	noIR	181112	1	WT	exp1	no IR	52	5781.01	3597.4	669.845
32	34	noIR	181112	1	WT	exp1	no IR	1	2342.89	275.668	170.084
32	35	noIR	181112	1	WT	exp1	no IR	4	2453.43	284.396	211.708
32	36	noIR	181112	1	WT	exp1	no IR	21	1545.84	1290.91	175.549
32	37	noIR	181112	1	WT	exp1	no IR	26	1778.55	1611.21	259.225
32	38	noIR	181112	1	WT	exp1	no IR	0	1233.39	151.434	89.6134
32	39	noIR	181112	1	WT	exp1	no IR	18	1032.2	895.59	156.526
32	40	noIR	181112	1	WT	exp1	no IR	22	1231.92	1009.24	185.606
32	41	noIR	181112	1	WT	exp1	no IR	7	677.897	536.32	81.4108
32	42	noIR	181112	1	WT	exp1	no IR	51	2846.45	2656.68	482.575
32	43	noIR	181112	1	WT	exp1	no IR	9	1178.25	692.633	128.42
32	44	noIR	181112	1	WT	exp1	no IR	46	1681.21	1604.9	325.787
32	45	noIR	181112	1	WT	exp1	no IR	5	2409.27	399.485	241.935
32	46	noIR	181112	1	WT	exp1	no IR	11	2414.16	387.509	243.233
32	47	noIR	181112	1	WT	exp1	no IR	22	1427.82	1441.99	208.94
32	48	noIR	181112	1	WT	exp1	no IR	19	1277.82	1535.53	165.769
32	49	noIR	181112	1	WT	exp1	no IR	27	1125.47	1525.86	211.147
32	50	noIR	181112	1	WT	exp1	no IR	0	1186.26	129.485	83.7563
32	51	noIR	181112	1	WT	exp1	no IR	7	1155.74	746.445	128.312
32	52	noIR	181112	1	WT	exp1	no IR	0	1380.45	179.183	112.864
32	53	noIR	181112	1	WT	exp1	no IR	0	1388.52	185.371	119.434
32	54	noIR	181112	1	WT	exp1	no IR	20	1184.81	1175.75	169.534
32	55	noIR	181112	1	WT	exp1	no IR	0	1635.3	232.02	143.89
33	1	noIR	181112	1	dCTD	exp1	no IR	7	859.014	522.343	115
33	2	noIR	181112	1	dCTD	exp1	no IR	11	619.012	713.242	121.02
33	3	noIR	181112	1	dCTD	exp1	no IR	7	1040.44	355.977	171.099
33	4	noIR	181112	1	dCTD	exp1	no IR	18	688.613	1277.93	166.361
33	5	noIR	181112	1	dCTD	exp1	no IR	20	1252.48	1353.51	243.469
33	6	noIR	181112	1	dCTD	exp1	no IR	36	2016.01	1583.17	382.514
33	7	noIR	181112	1	dCTD	exp1	no IR	11	829.435	1063.2	128.324
33	8	noIR	181112	1	dCTD	exp1	no IR	24	778.831	1260.61	182.647
33	9	noIR	181112	1	dCTD	exp1	no IR	16	1035.43	1404.92	165.262
33	10	noIR	181112	1	dCTD	exp1	no IR	2	750.704	998.451	109.932
33	11	noIR	181112	1	dCTD	exp1	no IR	5	1549.74	273.334	200.543
33	12	noIR	181112	1	dCTD	exp1	no IR	0	455.215	64.1799	37.7297
33	13	noIR	181112	1	dCTD	exp1	no IR	2	747.577	605.113	108.149
33	14	noIR	181112	1	dCTD	exp1	no IR	1	825.473	195.364	97.5193
33	15	noIR	181112	1	dCTD	exp1	no IR	0	700.115	143.325	87.0196
33	16	noIR	181112	1	dCTD	exp1	no IR	22	1297.78	842.085	227.014
33	17	noIR	181112	1	dCTD	exp1	no IR	13	1484.22	1311.57	216.136
33	18	noIR	181112	1	dCTD	exp1	no IR	8	1039.43	1485	138.425
33	19	noIR	181112	1	dCTD	exp1	no IR	12	1125.39	1371.7	134.435
33	20	noIR	181112	1	dCTD	exp1	no IR	1	844.831	1012.14	107.737
33	21	noIR	181112	1	dCTD	exp1	no IR	19	978.496	1190.12	187.321
33	22	noIR	181112	1	dCTD	exp1	no IR	26	1107.04	1298.46	209.545
33	23	noIR	181112	1	dCTD	exp1	no IR	21	970.559	1473.35	177.302
33	24	noIR	181112	1	dCTD	exp1	no IR	10	1213.67	1389.37	143.378
33	25	noIR	181112	1	dCTD	exp1	no IR	0	468.835	65.9301	38.6285
33	26	noIR	181112	1	dCTD	exp1	no IR	27	1241.22	1317.85	228.946
33	27	noIR	181112	1	dCTD	exp1	no IR	16	1653.25	1044.69	206.474
33	28	noIR	181112	1	dCTD	exp1	no IR	30	1905.26	2183.22	344.342
33	29	noIR	181112	1	dCTD	exp1	no IR	15	943.027	1516.85	139.62
33	30	noIR	181112	1	dCTD	exp1	no IR	28	1559	1691.64	265.057
33	31	noIR	181112	1	dCTD	exp1	no IR	0	1866.67	295.752	184.128
33	32	noIR	181112	1	dCTD	exp1	no IR	23	1324.74	851.829	191.248
33	33	noIR	181112	1	dCTD	exp1	no IR	32	1421.49	1602.4	245.879
33	34	noIR	181112	1	dCTD	exp1	no IR	23	1431.5	1446.46	228.592
33	35	noIR	181112	1	dCTD	exp1	no IR	25	1598.19	1500.1	252.934
33	36	noIR	181112	1	dCTD	exp1	no IR	22	1668.71	1047.07	224.928
33	37	noIR	181112	1	dCTD	exp1	no IR	14	1759.97	1590.59	188.65
33	38	noIR	181112	1	dCTD	exp1	no IR	44	3141.26	2730.99	531.352
33	39	noIR	181112	1	dCTD	exp1	no IR	20	1972.07	1735.91	311.033
33	40	noIR	181112	1	dCTD	exp1	no IR	29	1524.63	1292.47	264.325
33	41	noIR	181112	1	dCTD	exp1	no IR	34	4805.26	1854.31	557.822
33	42	noIR	181112	1	dCTD	exp1	no IR	16	1501.48	1247.89	208.484
33	43	noIR	181112	1	dCTD	exp1	no IR	11	649.852	710.259	97.6959
33	44	noIR	181112	1	dCTD	exp1	no IR	7	1013.63	708.429	105.254
33	45	noIR	181112	1	dCTD	exp1	no IR	17	1272.62	1648.78	180.838
33	46	noIR	181112	1	dCTD	exp1	no IR	23	1308.54	1461.94	218.668
33	47	noIR	181112	1	dCTD	exp1	no IR	21	1337.16	1348.25	214.628
33	48	noIR	181112	1	dCTD	exp1	no IR	31	2855.02	3068.66	330.165
33	49	noIR	181112	1	dCTD	exp1	no IR	0	2118.23	311.059	205.034
33	50	noIR	181112	1	dCTD	exp1	no IR	0	1730.87	288.062	174.37
33	51	noIR	181112	1	dCTD	exp1	no IR	0	1954.3	220.689	127.668
33	52	noIR	181112	1	dCTD	exp1	no IR	2	939.547	149.523	101.052
33	53	noIR	181112	1	dCTD	exp1	no IR	0	953.091	153.817	105.081
33	54	noIR	181112	1	dCTD	exp1	no IR	2	1778.82	281.828	203.717
33	55	noIR	181112	1	dCTD	exp1	no IR	2	1004.59	401.801	100.123
34	1	noIR	181112	1	dDBD	exp1	no IR	50	2012.37	1569.81	386.014
34	2	noIR	181112	1	dDBD	exp1	no IR	12	1658.16	1298.32	217.407
34	3	noIR	181112	1	dDBD	exp1	no IR	28	779.688	1082.06	197.269
34	4	noIR	181112	1	dDBD	exp1	no IR	0	896.245	227.85	112.268
34	5	noIR	181112	1	dDBD	exp1	no IR	1	791.134	222.936	126.829
34	6	noIR	181112	1	dDBD	exp1	no IR	25	2007.13	1404.31	277.709
34	7	noIR	181112	1	dDBD	exp1	no IR	0	656.389	199.532	80.6448
34	8	noIR	181112	1	dDBD	exp1	no IR	36	2253.49	1488.04	326.349
34	9	noIR	181112	1	dDBD	exp1	no IR	26	1024.55	979.078	195.895
34	10	noIR	181112	1	dDBD	exp1	no IR	17	3738.82	1206.74	476.398
34	11	noIR	181112	1	dDBD	exp1	no IR	21	1716.5	1169.73	207.558
34	12	noIR	181112	1	dDBD	exp1	no IR	1	2506.31	629.233	246.718
34	13	noIR	181112	1	dDBD	exp1	no IR	34	2443.05	1938.82	309.343
34	14	noIR	181112	1	dDBD	exp1	no IR	11	817.301	437.555	97.0882
34	15	noIR	181112	1	dDBD	exp1	no IR	14	1633.65	491.648	174.635
34	16	noIR	181112	1	dDBD	exp1	no IR	18	1932.42	1005.67	203.5
34	17	noIR	181112	1	dDBD	exp1	no IR	8	2553.71	459.246	197.141
34	18	noIR	181112	1	dDBD	exp1	no IR	1	999.699	134.136	79.7179
34	19	noIR	181112	1	dDBD	exp1	no IR	16	2017.73	1052.6	218.319
34	20	noIR	181112	1	dDBD	exp1	no IR	36	2583.75	1413.27	326.894
34	21	noIR	181112	1	dDBD	exp1	no IR	0	1912.5	196.325	98.2766
34	22	noIR	181112	1	dDBD	exp1	no IR	12	1851.32	327.886	227.638
34	23	noIR	181112	1	dDBD	exp1	no IR	0	1008.16	143.407	79.7639
34	24	noIR	181112	1	dDBD	exp1	no IR	1	2852.99	383.183	196.983
34	25	noIR	181112	1	dDBD	exp1	no IR	7	991.266	304.363	92.3428
34	26	noIR	181112	1	dDBD	exp1	no IR	37	1951.87	1644.59	279.202
34	27	noIR	181112	1	dDBD	exp1	no IR	25	1498.41	2168.74	271.677
34	28	noIR	181112	1	dDBD	exp1	no IR	13	1538.61	557.42	136.063
34	29	noIR	181112	1	dDBD	exp1	no IR	27	1419.1	2176.98	252.25
34	30	noIR	181112	1	dDBD	exp1	no IR	36	1509	1145.91	206.183
34	31	noIR	181112	1	dDBD	exp1	no IR	3	713.572	219.373	67.4709
34	32	noIR	181112	1	dDBD	exp1	no IR	0	2179.78	349.35	164.001
34	33	noIR	181112	1	dDBD	exp1	no IR	50	1375.76	1449.45	233.18
34	34	noIR	181112	1	dDBD	exp1	no IR	9	1455.65	433.125	119.911
34	35	noIR	181112	1	dDBD	exp1	no IR	50	1517.77	1897.54	245.926
34	36	noIR	181112	1	dDBD	exp1	no IR	37	1146.86	1347.3	184.964
34	37	noIR	181112	1	dDBD	exp1	no IR	0	1122.35	178.022	91.7462
34	38	noIR	181112	1	dDBD	exp1	no IR	0	1576.82	243.123	126.904
34	39	noIR	181112	1	dDBD	exp1	no IR	33	1219.77	1644.44	215.82
34	40	noIR	181112	1	dDBD	exp1	no IR	1	2048.17	330.698	190.508
34	41	noIR	181112	1	dDBD	exp1	no IR	4	1081.64	630.164	124.653
35	1	noIR	181112	1	dDBDdCTD	exp1	no IR	9	389.896	451.424	84.0242
35	2	noIR	181112	1	dDBDdCTD	exp1	no IR	0	564.67	133.591	73.7581
35	3	noIR	181112	1	dDBDdCTD	exp1	no IR	16	647.069	786.896	116.824
35	4	noIR	181112	1	dDBDdCTD	exp1	no IR	3	1506.77	308.263	205.202
35	5	noIR	181112	1	dDBDdCTD	exp1	no IR	20	1060.97	2057.11	174.299
35	6	noIR	181112	1	dDBDdCTD	exp1	no IR	6	1631.75	355.527	238.398
35	7	noIR	181112	1	dDBDdCTD	exp1	no IR	10	1882.39	306.531	200.105
35	8	noIR	181112	1	dDBDdCTD	exp1	no IR	11	2130.27	373.36	255.255
35	9	noIR	181112	1	dDBDdCTD	exp1	no IR	26	1410.52	1357.04	174.476
35	10	noIR	181112	1	dDBDdCTD	exp1	no IR	21	1085.68	2229.11	187.154
35	11	noIR	181112	1	dDBDdCTD	exp1	no IR	26	1611.96	2577.35	219.79
35	12	noIR	181112	1	dDBDdCTD	exp1	no IR	27	1499.18	2286.55	218.071
35	13	noIR	181112	1	dDBDdCTD	exp1	no IR	25	1379.03	2027.89	199.844
35	14	noIR	181112	1	dDBDdCTD	exp1	no IR	29	1704.56	1996.28	218.337
35	15	noIR	181112	1	dDBDdCTD	exp1	no IR	24	1631.78	2054.18	195.766
35	16	noIR	181112	1	dDBDdCTD	exp1	no IR	9	1056.58	932.833	113.422
35	17	noIR	181112	1	dDBDdCTD	exp1	no IR	33	1558.37	2223.5	210.223
35	18	noIR	181112	1	dDBDdCTD	exp1	no IR	18	1048.46	1732.26	138.706
35	19	noIR	181112	1	dDBDdCTD	exp1	no IR	15	1648.01	1828.24	188.368
35	20	noIR	181112	1	dDBDdCTD	exp1	no IR	8	1259.34	1458.74	150.405
35	21	noIR	181112	1	dDBDdCTD	exp1	no IR	24	1561.74	2503.68	212.774
36	1	noIR	181112	2	WT	exp1	no IR	9	1444.98	255.654	237.357
36	2	noIR	181112	2	WT	exp1	no IR	0	704.635	131.315	73.287
36	3	noIR	181112	2	WT	exp1	no IR	0	1870.41	289.141	142.695
36	4	noIR	181112	2	WT	exp1	no IR	0	907.484	246.372	121.554
36	5	noIR	181112	2	WT	exp1	no IR	0	940.815	213.592	124.118
36	6	noIR	181112	2	WT	exp1	no IR	1	2028.71	359.131	228.941
36	7	noIR	181112	2	WT	exp1	no IR	14	1085.21	1623.64	180.413
36	8	noIR	181112	2	WT	exp1	no IR	0	276.55	52.8483	32.1836
36	9	noIR	181112	2	WT	exp1	no IR	13	1243.53	177.106	166.971
36	10	noIR	181112	2	WT	exp1	no IR	24	1557.79	1330.95	290.311
36	11	noIR	181112	2	WT	exp1	no IR	16	1734.83	1364.96	292.056
36	12	noIR	181112	2	WT	exp1	no IR	0	1014.19	175.148	85.1893
36	13	noIR	181112	2	WT	exp1	no IR	7	1695.09	497.924	208.28
36	14	noIR	181112	2	WT	exp1	no IR	13	2562.14	1700.29	293.174
36	15	noIR	181112	2	WT	exp1	no IR	0	326.86	102.333	37.2645
36	16	noIR	181112	2	WT	exp1	no IR	11	1602.87	786.575	201.117
36	17	noIR	181112	2	WT	exp1	no IR	23	1478.41	1704.9	234.07
36	18	noIR	181112	2	WT	exp1	no IR	5	1264.05	829.315	150.746
36	19	noIR	181112	2	WT	exp1	no IR	10	1172.37	1156.78	149.784
36	20	noIR	181112	2	WT	exp1	no IR	0	770.19	488.492	78.8079
36	21	noIR	181112	2	WT	exp1	no IR	5	2165.61	452.303	265.803
36	22	noIR	181112	2	WT	exp1	no IR	5	1089.96	1169.76	131.349
36	23	noIR	181112	2	WT	exp1	no IR	11	1063.12	1249.54	137.488
36	24	noIR	181112	2	WT	exp1	no IR	1	1361.81	314.725	111.892
36	25	noIR	181112	2	WT	exp1	no IR	15	1579.21	1783.8	201.735
36	26	noIR	181112	2	WT	exp1	no IR	12	1296.54	161.214	147.638
36	27	noIR	181112	2	WT	exp1	no IR	26	1580.55	1661.73	243.521
36	28	noIR	181112	2	WT	exp1	no IR	23	1276.08	1067.94	244.627
36	29	noIR	181112	2	WT	exp1	no IR	19	1398.92	1010.49	179.661
36	30	noIR	181112	2	WT	exp1	no IR	15	1715.35	284.212	174.893
36	31	noIR	181112	2	WT	exp1	no IR	22	1108.82	1077.6	194.34
36	32	noIR	181112	2	WT	exp1	no IR	18	2491.38	1351.66	303.45
36	33	noIR	181112	2	WT	exp1	no IR	26	2287.66	1342.3	324.23
36	34	noIR	181112	2	WT	exp1	no IR	0	843.699	72.5829	46.5684
36	35	noIR	181112	2	WT	exp1	no IR	10	1197.55	916.065	154.504
36	36	noIR	181112	2	WT	exp1	no IR	27	1887.03	1272.95	335.575
36	37	noIR	181112	2	WT	exp1	no IR	19	1843.96	258.776	249.151
36	38	noIR	181112	2	WT	exp1	no IR	20	1333.22	1169.6	209.87
36	39	noIR	181112	2	WT	exp1	no IR	18	1456.82	1414.69	219.728
36	40	noIR	181112	2	WT	exp1	no IR	16	2403.61	475.642	273.603
36	41	noIR	181112	2	WT	exp1	no IR	0	445.615	78.8997	43.719
36	42	noIR	181112	2	WT	exp1	no IR	25	1437.72	1283.48	253.003
36	43	noIR	181112	2	WT	exp1	no IR	16	1620.56	1338.16	210.584
36	44	noIR	181112	2	WT	exp1	no IR	10	1210.74	1163.5	167.773
36	45	noIR	181112	2	WT	exp1	no IR	0	634.842	65.7906	38.1267
36	46	noIR	181112	2	WT	exp1	no IR	3	2422.81	291.337	211.809
36	47	noIR	181112	2	WT	exp1	no IR	21	1942.71	956.076	282.404
36	48	noIR	181112	2	WT	exp1	no IR	10	1836.06	646.371	258.64
36	49	noIR	181112	2	WT	exp1	no IR	19	1568.97	1138.83	228.365
36	50	noIR	181112	2	WT	exp1	no IR	42	3075.36	1409.62	451.88
36	51	noIR	181112	2	WT	exp1	no IR	19	1218.53	1224.13	224.685
36	52	noIR	181112	2	WT	exp1	no IR	18	2060.82	427.496	353.923
36	53	noIR	181112	2	WT	exp1	no IR	23	1756.7	1512.84	308.855
36	54	noIR	181112	2	WT	exp1	no IR	40	1959.7	249.984	306.083
36	55	noIR	181112	2	WT	exp1	no IR	0	1689.43	310.624	220.755
36	56	noIR	181112	2	WT	exp1	no IR	14	1442.54	1444.46	181.771
36	57	noIR	181112	2	WT	exp1	no IR	12	1389.28	1222.83	190.029
36	58	noIR	181112	2	WT	exp1	no IR	7	877.002	396.452	89.1908
36	59	noIR	181112	2	WT	exp1	no IR	22	1572.48	686.562	221.766
36	60	noIR	181112	2	WT	exp1	no IR	6	1040.11	1024.02	128.478
36	61	noIR	181112	2	WT	exp1	no IR	0	432.083	106.487	56.36
36	62	noIR	181112	2	WT	exp1	no IR	21	1579.14	544.99	215.127
36	63	noIR	181112	2	WT	exp1	no IR	17	897.767	975.535	183.249
36	64	noIR	181112	2	WT	exp1	no IR	0	2021.36	208.523	127.526
37	1	noIR	181112	2	dCTD	exp1	no IR	4	715.51	489.478	121.678
37	2	noIR	181112	2	dCTD	exp1	no IR	9	841.352	1198.62	152.986
37	3	noIR	181112	2	dCTD	exp1	no IR	4	857.065	231.086	150.248
37	4	noIR	181112	2	dCTD	exp1	no IR	7	1397.69	1377.37	196.868
37	5	noIR	181112	2	dCTD	exp1	no IR	2	492.521	118.708	79.4762
37	6	noIR	181112	2	dCTD	exp1	no IR	6	761.588	189.141	103.327
37	7	noIR	181112	2	dCTD	exp1	no IR	0	634.199	709.563	94.6181
37	8	noIR	181112	2	dCTD	exp1	no IR	14	1706.65	1685.77	209.558
37	9	noIR	181112	2	dCTD	exp1	no IR	20	2582.32	2668.94	321.326
37	10	noIR	181112	2	dCTD	exp1	no IR	10	1436.24	1017.02	180.972
37	11	noIR	181112	2	dCTD	exp1	no IR	7	1179.58	1435.73	140.169
37	12	noIR	181112	2	dCTD	exp1	no IR	9	1940.47	362.73	272.239
37	13	noIR	181112	2	dCTD	exp1	no IR	0	730.254	560.648	91.498
37	14	noIR	181112	2	dCTD	exp1	no IR	10	1124.53	1220.58	153.692
37	15	noIR	181112	2	dCTD	exp1	no IR	8	583.476	432.813	85.9279
37	16	noIR	181112	2	dCTD	exp1	no IR	16	2047.09	506.879	274.912
37	17	noIR	181112	2	dCTD	exp1	no IR	10	1061.61	793.513	141.87
37	18	noIR	181112	2	dCTD	exp1	no IR	12	1596.58	940.347	179.231
37	19	noIR	181112	2	dCTD	exp1	no IR	27	1894.92	987.44	314.752
37	20	noIR	181112	2	dCTD	exp1	no IR	19	1722.66	1824.87	249.385
37	21	noIR	181112	2	dCTD	exp1	no IR	15	972.894	553.177	131.933
37	22	noIR	181112	2	dCTD	exp1	no IR	24	1968.92	985.066	245.049
37	23	noIR	181112	2	dCTD	exp1	no IR	26	1277.24	2035.01	219.024
37	24	noIR	181112	2	dCTD	exp1	no IR	30	4694.6	3321.12	521.191
37	25	noIR	181112	2	dCTD	exp1	no IR	17	966.073	1458.07	185.443
37	26	noIR	181112	2	dCTD	exp1	no IR	16	1905.87	906.032	217.771
37	27	noIR	181112	2	dCTD	exp1	no IR	5	936.025	434.049	88.8366
37	28	noIR	181112	2	dCTD	exp1	no IR	30	1878.1	1276.54	278.374
37	29	noIR	181112	2	dCTD	exp1	no IR	16	1252.7	1327.4	142.463
37	30	noIR	181112	2	dCTD	exp1	no IR	18	1672.45	973.508	209.739
37	31	noIR	181112	2	dCTD	exp1	no IR	1	1268.36	585.751	121.99
37	32	noIR	181112	2	dCTD	exp1	no IR	24	1464.56	2036.36	218.691
37	33	noIR	181112	2	dCTD	exp1	no IR	1	2321.08	315.73	187.563
37	34	noIR	181112	2	dCTD	exp1	no IR	27	1768.45	1865.01	265.606
37	35	noIR	181112	2	dCTD	exp1	no IR	11	2854.43	1512.65	254.346
37	36	noIR	181112	2	dCTD	exp1	no IR	11	2425.12	303.683	220.176
37	37	noIR	181112	2	dCTD	exp1	no IR	35	1531.95	1918.79	250.041
37	38	noIR	181112	2	dCTD	exp1	no IR	3	1271.07	578.085	122.782
37	39	noIR	181112	2	dCTD	exp1	no IR	45	3373.25	2288.17	484.138
37	40	noIR	181112	2	dCTD	exp1	no IR	32	1507.48	1836.12	253.148
37	41	noIR	181112	2	dCTD	exp1	no IR	12	1983.34	718.664	187.266
37	42	noIR	181112	2	dCTD	exp1	no IR	16	1726.16	1181.36	175.049
37	43	noIR	181112	2	dCTD	exp1	no IR	9	1157.34	1013.37	149.911
37	44	noIR	181112	2	dCTD	exp1	no IR	11	1861.45	929.733	184.982
37	45	noIR	181112	2	dCTD	exp1	no IR	6	2320.81	326.759	229.576
37	46	noIR	181112	2	dCTD	exp1	no IR	10	1572.96	773.511	230.353
37	47	noIR	181112	2	dCTD	exp1	no IR	16	1574.24	834.3	287.975
37	48	noIR	181112	2	dCTD	exp1	no IR	16	1335.03	1321.41	187.124
37	49	noIR	181112	2	dCTD	exp1	no IR	8	989.796	1182.8	141.769
37	50	noIR	181112	2	dCTD	exp1	no IR	0	993.049	148.499	91.4319
38	1	noIR	181112	2	dDBD	exp1	no IR	2	776.45	176.739	104.531
38	2	noIR	181112	2	dDBD	exp1	no IR	0	1021.2	234.731	130.617
38	3	noIR	181112	2	dDBD	exp1	no IR	27	1062.16	1844.64	249.003
38	4	noIR	181112	2	dDBD	exp1	no IR	3	638.088	140.074	89.5097
38	5	noIR	181112	2	dDBD	exp1	no IR	16	1251.21	875.095	185.716
38	6	noIR	181112	2	dDBD	exp1	no IR	19	1222.21	994.928	145.425
38	7	noIR	181112	2	dDBD	exp1	no IR	34	1265.28	1600.82	253.759
38	8	noIR	181112	2	dDBD	exp1	no IR	16	2652.35	1429.06	343.519
38	9	noIR	181112	2	dDBD	exp1	no IR	1	1053.11	172.67	72.8575
38	10	noIR	181112	2	dDBD	exp1	no IR	4	2184.87	955.619	200.223
38	11	noIR	181112	2	dDBD	exp1	no IR	0	1614.52	203.052	93.4025
38	12	noIR	181112	2	dDBD	exp1	no IR	28	1245.56	1712.3	242.902
38	13	noIR	181112	2	dDBD	exp1	no IR	22	1684	2304.98	205.25
38	14	noIR	181112	2	dDBD	exp1	no IR	22	1360.78	1772.13	226.556
38	15	noIR	181112	2	dDBD	exp1	no IR	31	1684.96	1547.55	252.988
38	16	noIR	181112	2	dDBD	exp1	no IR	22	2683	1616.16	279.098
38	17	noIR	181112	2	dDBD	exp1	no IR	30	1337.85	1832.35	250.15
38	18	noIR	181112	2	dDBD	exp1	no IR	26	1454.01	2194.99	205.828
38	19	noIR	181112	2	dDBD	exp1	no IR	14	1854.33	559.681	216.85
38	20	noIR	181112	2	dDBD	exp1	no IR	1	1366.51	179.39	89.2725
38	21	noIR	181112	2	dDBD	exp1	no IR	28	1791.96	1465.34	238.79
38	22	noIR	181112	2	dDBD	exp1	no IR	5	1549.48	642.041	166.638
38	23	noIR	181112	2	dDBD	exp1	no IR	13	3464.27	767.299	297.326
38	24	noIR	181112	2	dDBD	exp1	no IR	4	957.296	161.379	99.2476
38	25	noIR	181112	2	dDBD	exp1	no IR	27	1790.06	2264.49	214.194
38	26	noIR	181112	2	dDBD	exp1	no IR	17	1277.46	1233.27	144.011
38	27	noIR	181112	2	dDBD	exp1	no IR	38	1526.52	1770.01	268.908
38	28	noIR	181112	2	dDBD	exp1	no IR	9	1241.43	910.218	133.227
38	29	noIR	181112	2	dDBD	exp1	no IR	29	1655.49	1222.46	280.682
38	30	noIR	181112	2	dDBD	exp1	no IR	21	1327.12	1740.93	203.194
39	1	noIR	181112	2	dDBDdCTD	exp1	no IR	23	1456.42	1105.74	208.326
39	2	noIR	181112	2	dDBDdCTD	exp1	no IR	30	1549.33	991.586	256.995
39	3	noIR	181112	2	dDBDdCTD	exp1	no IR	8	1393.82	855.179	161.596
39	4	noIR	181112	2	dDBDdCTD	exp1	no IR	30	1566.41	991.062	233.022
39	5	noIR	181112	2	dDBDdCTD	exp1	no IR	6	1096.91	766.956	135.339
39	6	noIR	181112	2	dDBDdCTD	exp1	no IR	44	2184.13	3441.47	393.628
39	7	noIR	181112	2	dDBDdCTD	exp1	no IR	37	1699.29	1047.09	214.951
39	8	noIR	181112	2	dDBDdCTD	exp1	no IR	14	2778.03	734.979	241.002
39	9	noIR	181112	2	dDBDdCTD	exp1	no IR	27	1387.05	1341.75	208.702
39	10	noIR	181112	2	dDBDdCTD	exp1	no IR	24	1392.84	1357.64	180.728
39	11	noIR	181112	2	dDBDdCTD	exp1	no IR	20	1530.44	1574.88	192.349
39	12	noIR	181112	2	dDBDdCTD	exp1	no IR	20	974.278	1443.71	171.005
39	13	noIR	181112	2	dDBDdCTD	exp1	no IR	20	1445.74	1544.43	196.747
39	14	noIR	181112	2	dDBDdCTD	exp1	no IR	25	1424.81	2078.33	194.72
39	15	noIR	181112	2	dDBDdCTD	exp1	no IR	3	2678.8	383.778	220.624
39	16	noIR	181112	2	dDBDdCTD	exp1	no IR	26	1592.97	1696.65	214.866
39	17	noIR	181112	2	dDBDdCTD	exp1	no IR	34	1336.73	1130.19	194.861
39	18	noIR	181112	2	dDBDdCTD	exp1	no IR	13	1047.56	1161.28	153.521
39	19	noIR	181112	2	dDBDdCTD	exp1	no IR	4	2892.72	460.08	246.582
39	20	noIR	181112	2	dDBDdCTD	exp1	no IR	5	1175.83	206.871	131.718
40	1	noIR	181112	3	WT	exp1	no IR	39	1556.7	1729.02	375.739
40	2	noIR	181112	3	WT	exp1	no IR	38	1776.2	1747.24	367.002
40	3	noIR	181112	3	WT	exp1	no IR	1	2238.53	578.918	215.586
40	4	noIR	181112	3	WT	exp1	no IR	0	1344.25	182.133	85.4143
40	5	noIR	181112	3	WT	exp1	no IR	18	1547.26	782.666	181.829
40	6	noIR	181112	3	WT	exp1	no IR	22	2157.18	744.547	362.292
40	7	noIR	181112	3	WT	exp1	no IR	22	1922.9	1124.51	234.9
40	8	noIR	181112	3	WT	exp1	no IR	0	710.303	81.9264	39.9184
40	9	noIR	181112	3	WT	exp1	no IR	22	2066.53	1325.8	236.269
40	10	noIR	181112	3	WT	exp1	no IR	17	1776.89	981.137	213.003
40	11	noIR	181112	3	WT	exp1	no IR	2	2964.73	374.616	217.461
40	12	noIR	181112	3	WT	exp1	no IR	0	599.97	79.3089	34.9996
40	13	noIR	181112	3	WT	exp1	no IR	17	2019.34	845.755	259.494
40	14	noIR	181112	3	WT	exp1	no IR	0	1416.12	171.155	103.001
40	15	noIR	181112	3	WT	exp1	no IR	30	2278.62	1399.29	251.385
40	16	noIR	181112	3	WT	exp1	no IR	18	1459.29	1417.72	214.047
40	17	noIR	181112	3	WT	exp1	no IR	9	2288.75	998.526	198.245
40	18	noIR	181112	3	WT	exp1	no IR	11	2606.71	1331.29	242.59
40	19	noIR	181112	3	WT	exp1	no IR	4	711.654	271.628	60.987
40	20	noIR	181112	3	WT	exp1	no IR	9	1225.01	707.78	135.615
40	21	noIR	181112	3	WT	exp1	no IR	0	1458.79	126.36	60.5025
40	22	noIR	181112	3	WT	exp1	no IR	1	1690.09	218.606	127.6
40	23	noIR	181112	3	WT	exp1	no IR	12	1531.87	715.279	156.357
40	24	noIR	181112	3	WT	exp1	no IR	0	1221.34	172.86	92.0211
40	25	noIR	181112	3	WT	exp1	no IR	6	1414.17	512.189	123.07
40	26	noIR	181112	3	WT	exp1	no IR	25	1695.25	1415.74	244.688
40	27	noIR	181112	3	WT	exp1	no IR	21	2645.89	1253.55	255.113
40	28	noIR	181112	3	WT	exp1	no IR	26	1783.14	1188.85	201.662
40	29	noIR	181112	3	WT	exp1	no IR	0	395.295	64.275	32.2977
40	30	noIR	181112	3	WT	exp1	no IR	34	1884.85	1501.27	236.957
40	31	noIR	181112	3	WT	exp1	no IR	13	1634.09	914.442	192.646
40	32	noIR	181112	3	WT	exp1	no IR	13	1492.2	978.933	177.644
40	33	noIR	181112	3	WT	exp1	no IR	15	1464.76	1034.34	168.15
40	34	noIR	181112	3	WT	exp1	no IR	27	2270.8	1129.73	243.264
40	35	noIR	181112	3	WT	exp1	no IR	0	1480.59	347.012	127.504
40	36	noIR	181112	3	WT	exp1	no IR	31	1737.03	1110.54	216.407
40	37	noIR	181112	3	WT	exp1	no IR	38	2210.59	276.827	317.556
40	38	noIR	181112	3	WT	exp1	no IR	7	1422.96	672.34	134.586
41	1	noIR	181112	3	dCTD	exp1	no IR	14	914.674	771.171	164.955
41	2	noIR	181112	3	dCTD	exp1	no IR	8	864.875	942.354	140.421
41	3	noIR	181112	3	dCTD	exp1	no IR	5	485.214	501.906	73.525
41	4	noIR	181112	3	dCTD	exp1	no IR	5	945.679	874.319	136.202
41	5	noIR	181112	3	dCTD	exp1	no IR	1	486.011	110.043	64.5552
41	6	noIR	181112	3	dCTD	exp1	no IR	5	1296.42	276.895	191.162
41	7	noIR	181112	3	dCTD	exp1	no IR	4	1005.7	807.054	129.977
41	8	noIR	181112	3	dCTD	exp1	no IR	16	1776.29	1341.79	220.853
41	9	noIR	181112	3	dCTD	exp1	no IR	0	766.071	165.13	84.4417
41	10	noIR	181112	3	dCTD	exp1	no IR	15	969.629	1663.83	159.247
41	11	noIR	181112	3	dCTD	exp1	no IR	4	393.645	690.617	66.4031
41	12	noIR	181112	3	dCTD	exp1	no IR	1	1027.48	197.581	112.19
41	13	noIR	181112	3	dCTD	exp1	no IR	9	531.465	880.585	84.5985
41	14	noIR	181112	3	dCTD	exp1	no IR	5	6310.25	14558.6	378.109
41	15	noIR	181112	3	dCTD	exp1	no IR	2	1236.19	194.098	120.2
41	16	noIR	181112	3	dCTD	exp1	no IR	25	1931.45	1217.54	229.469
41	17	noIR	181112	3	dCTD	exp1	no IR	25	1481.34	1796.69	228.774
41	18	noIR	181112	3	dCTD	exp1	no IR	1	2458.93	2037.29	211.379
41	19	noIR	181112	3	dCTD	exp1	no IR	0	1113.52	158.98	90.1167
41	20	noIR	181112	3	dCTD	exp1	no IR	0	1153.6	164.009	100.015
41	21	noIR	181112	3	dCTD	exp1	no IR	25	1243.75	1692.55	233.791
41	22	noIR	181112	3	dCTD	exp1	no IR	22	1171.37	1548.55	181.916
41	23	noIR	181112	3	dCTD	exp1	no IR	12	1830.73	1584.07	188.159
41	24	noIR	181112	3	dCTD	exp1	no IR	0	1156.59	190.83	98.7889
41	25	noIR	181112	3	dCTD	exp1	no IR	26	1482.61	1885.12	214.741
41	26	noIR	181112	3	dCTD	exp1	no IR	0	1528.65	179.828	106.698
41	27	noIR	181112	3	dCTD	exp1	no IR	17	1167.08	1518.3	166.735
41	28	noIR	181112	3	dCTD	exp1	no IR	1	936.129	118.826	70.6336
41	29	noIR	181112	3	dCTD	exp1	no IR	13	1016.45	1529.07	155.474
41	30	noIR	181112	3	dCTD	exp1	no IR	0	1229.01	192.766	108.12
41	31	noIR	181112	3	dCTD	exp1	no IR	24	2170.87	1001.47	250.24
41	32	noIR	181112	3	dCTD	exp1	no IR	27	1622.37	1849.17	247.716
41	33	noIR	181112	3	dCTD	exp1	no IR	33	2226.02	946.277	274.904
41	34	noIR	181112	3	dCTD	exp1	no IR	13	1537.46	1850.64	172.493
41	35	noIR	181112	3	dCTD	exp1	no IR	33	3975.11	2752.78	460.279
41	36	noIR	181112	3	dCTD	exp1	no IR	6	860.118	390.146	88.7547
41	37	noIR	181112	3	dCTD	exp1	no IR	26	1245.81	1441.41	229.904
41	38	noIR	181112	3	dCTD	exp1	no IR	25	1221.83	1668.03	202.033
41	39	noIR	181112	3	dCTD	exp1	no IR	34	2578.61	1670.47	354.136
41	40	noIR	181112	3	dCTD	exp1	no IR	10	1381.29	686.601	151.747
41	41	noIR	181112	3	dCTD	exp1	no IR	5	2264.91	1441.2	210.098
41	42	noIR	181112	3	dCTD	exp1	no IR	3	1765.71	766.046	157.571
41	43	noIR	181112	3	dCTD	exp1	no IR	17	1106.75	1630.77	195.546
41	44	noIR	181112	3	dCTD	exp1	no IR	28	2091.73	1221.88	271.319
41	45	noIR	181112	3	dCTD	exp1	no IR	31	1893.95	2254.96	312.899
41	46	noIR	181112	3	dCTD	exp1	no IR	8	1747.61	1696.77	160.416
41	47	noIR	181112	3	dCTD	exp1	no IR	27	2156.88	1326.37	264.763
41	48	noIR	181112	3	dCTD	exp1	no IR	27	1194.6	1481.09	215.177
41	49	noIR	181112	3	dCTD	exp1	no IR	23	1760.43	1391.51	267.518
42	1	noIR	181112	3	dDBD	exp1	no IR	10	872.098	476.126	129.099
42	2	noIR	181112	3	dDBD	exp1	no IR	10	1172.36	629.858	171.708
42	3	noIR	181112	3	dDBD	exp1	no IR	0	604.976	150.736	71.1818
42	4	noIR	181112	3	dDBD	exp1	no IR	12	593.859	489.958	109.672
42	5	noIR	181112	3	dDBD	exp1	no IR	9	904.168	280.342	120.895
42	6	noIR	181112	3	dDBD	exp1	no IR	11	1033.87	351.725	141.97
42	7	noIR	181112	3	dDBD	exp1	no IR	22	1436.19	1165.91	235.496
42	8	noIR	181112	3	dDBD	exp1	no IR	23	1945.45	1965.8	329.405
42	9	noIR	181112	3	dDBD	exp1	no IR	13	1337.04	1548.58	219.21
42	10	noIR	181112	3	dDBD	exp1	no IR	12	1043.93	280.863	126.84
42	11	noIR	181112	3	dDBD	exp1	no IR	29	3285.17	1845.35	442.925
42	12	noIR	181112	3	dDBD	exp1	no IR	22	2335.28	1495.73	327.819
42	13	noIR	181112	3	dDBD	exp1	no IR	20	1485.39	1647.91	219.268
42	14	noIR	181112	3	dDBD	exp1	no IR	28	1566.45	1639.77	294.02
42	15	noIR	181112	3	dDBD	exp1	no IR	27	1449.48	1426.78	255.283
42	16	noIR	181112	3	dDBD	exp1	no IR	30	1696.5	1675.11	312.329
42	17	noIR	181112	3	dDBD	exp1	no IR	23	1773.75	1946.48	250.127
42	18	noIR	181112	3	dDBD	exp1	no IR	24	1629.36	2325.55	225.026
42	19	noIR	181112	3	dDBD	exp1	no IR	34	1522.54	1714.6	257.28
42	20	noIR	181112	3	dDBD	exp1	no IR	24	1510.56	1551.45	232.071
42	21	noIR	181112	3	dDBD	exp1	no IR	24	1698.2	1606.46	216.183
42	22	noIR	181112	3	dDBD	exp1	no IR	23	1261.83	1247.74	220.9
42	23	noIR	181112	3	dDBD	exp1	no IR	36	2232.07	1776.35	326.18
42	24	noIR	181112	3	dDBD	exp1	no IR	25	2000.46	1735.04	289.704
42	25	noIR	181112	3	dDBD	exp1	no IR	21	1717.31	2087.02	201.833
42	26	noIR	181112	3	dDBD	exp1	no IR	26	1663.58	1475.22	237.434
42	27	noIR	181112	3	dDBD	exp1	no IR	23	1593.12	1740.36	246.352
42	28	noIR	181112	3	dDBD	exp1	no IR	25	1544.98	1608.01	274.524
42	29	noIR	181112	3	dDBD	exp1	no IR	25	1974.79	1868.51	266.176
42	30	noIR	181112	3	dDBD	exp1	no IR	36	2122.38	1901.29	315.783
42	31	noIR	181112	3	dDBD	exp1	no IR	24	1935.11	1483.67	291.795
42	32	noIR	181112	3	dDBD	exp1	no IR	27	1891.76	1599.86	332.16
42	33	noIR	181112	3	dDBD	exp1	no IR	2	2392.62	340.378	213.32
42	34	noIR	181112	3	dDBD	exp1	no IR	8	2179.4	312.453	215.602
42	35	noIR	181112	3	dDBD	exp1	no IR	26	1271.37	1554.44	207.214
42	36	noIR	181112	3	dDBD	exp1	no IR	1	2336.67	353.539	204.006
42	37	noIR	181112	3	dDBD	exp1	no IR	21	1078.83	2175.79	214.202
42	38	noIR	181112	3	dDBD	exp1	no IR	25	1473.49	1225.09	267.306
42	39	noIR	181112	3	dDBD	exp1	no IR	0	1769.06	217.467	108.224
42	40	noIR	181112	3	dDBD	exp1	no IR	18	1087.6	1518.25	178.839
43	1	noIR	181112	3	dDBDdCTD	exp1	no IR	0	1548.33	328.547	232.047
43	2	noIR	181112	3	dDBDdCTD	exp1	no IR	29	1652.82	471.226	316.603
43	3	noIR	181112	3	dDBDdCTD	exp1	no IR	0	1821.14	219.564	116.384
43	4	noIR	181112	3	dDBDdCTD	exp1	no IR	4	1056.29	205.03	148.528
43	5	noIR	181112	3	dDBDdCTD	exp1	no IR	26	1772.56	1419.55	271.38
43	6	noIR	181112	3	dDBDdCTD	exp1	no IR	1	1214.62	191.223	133.886
43	7	noIR	181112	3	dDBDdCTD	exp1	no IR	33	1871.58	1717.36	276.244
43	8	noIR	181112	3	dDBDdCTD	exp1	no IR	1	2206.76	400.793	267.231
43	9	noIR	181112	3	dDBDdCTD	exp1	no IR	0	2537.83	383.957	250.171
43	10	noIR	181112	3	dDBDdCTD	exp1	no IR	30	1165.11	1341.74	229.578
43	11	noIR	181112	3	dDBDdCTD	exp1	no IR	35	1323.07	1879.91	239.467
43	12	noIR	181112	3	dDBDdCTD	exp1	no IR	43	1614.09	2086.92	271.316
43	13	noIR	181112	3	dDBDdCTD	exp1	no IR	39	2552.91	1640.5	346.385
43	14	noIR	181112	3	dDBDdCTD	exp1	no IR	35	1273.8	1535.38	265.526
43	15	noIR	181112	3	dDBDdCTD	exp1	no IR	35	2620.23	435.474	381.972
43	16	noIR	181112	3	dDBDdCTD	exp1	no IR	6	1050.02	180.076	135.752
43	17	noIR	181112	3	dDBDdCTD	exp1	no IR	11	1802.66	821.991	258.344
43	18	noIR	181112	3	dDBDdCTD	exp1	no IR	37	1481.51	1879.52	242.349
44	1	noIR	181112	4	WT	exp1	no IR	15	1054.34	758.184	209.578
44	2	noIR	181112	4	WT	exp1	no IR	20	1073.88	1512.1	212.412
44	3	noIR	181112	4	WT	exp1	no IR	0	686.897	131.097	65.9283
44	4	noIR	181112	4	WT	exp1	no IR	3	698.77	621.959	101.732
44	5	noIR	181112	4	WT	exp1	no IR	8	1275.12	210.055	156.977
44	6	noIR	181112	4	WT	exp1	no IR	1	1001.87	354.116	159.34
44	7	noIR	181112	4	WT	exp1	no IR	17	1156.2	1296.82	195.448
44	8	noIR	181112	4	WT	exp1	no IR	15	886.258	861.555	171.008
44	9	noIR	181112	4	WT	exp1	no IR	28	2584.53	2257.7	370.934
44	10	noIR	181112	4	WT	exp1	no IR	11	1739.1	1519.11	226.533
44	11	noIR	181112	4	WT	exp1	no IR	0	1690.59	228.403	142.491
44	12	noIR	181112	4	WT	exp1	no IR	5	382.009	454.669	66.0701
44	13	noIR	181112	4	WT	exp1	no IR	7	1524.43	855.902	211.138
44	14	noIR	181112	4	WT	exp1	no IR	3	1108.13	295.474	96.2086
44	15	noIR	181112	4	WT	exp1	no IR	25	1319.79	1478.71	237.437
44	16	noIR	181112	4	WT	exp1	no IR	18	1091.15	1290.61	191.882
44	17	noIR	181112	4	WT	exp1	no IR	29	2687.46	1282.85	448.385
44	18	noIR	181112	4	WT	exp1	no IR	8	1432.24	211.181	211.657
44	19	noIR	181112	4	WT	exp1	no IR	22	1631.59	1572.49	237.957
44	20	noIR	181112	4	WT	exp1	no IR	37	2372.77	1205.97	365.106
44	21	noIR	181112	4	WT	exp1	no IR	11	1245.82	1066.88	163.539
44	22	noIR	181112	4	WT	exp1	no IR	24	1281.02	920.911	239.253
44	23	noIR	181112	4	WT	exp1	no IR	16	1300.5	1348.82	187.708
44	24	noIR	181112	4	WT	exp1	no IR	0	1023.03	159.708	105.166
44	25	noIR	181112	4	WT	exp1	no IR	0	1590.38	250.174	143.71
44	26	noIR	181112	4	WT	exp1	no IR	21	1242.1	1237.29	173.618
44	27	noIR	181112	4	WT	exp1	no IR	15	778.369	986.664	146.228
44	28	noIR	181112	4	WT	exp1	no IR	1	1455.85	166.006	105.567
44	29	noIR	181112	4	WT	exp1	no IR	0	826.738	116.326	85.5433
44	30	noIR	181112	4	WT	exp1	no IR	11	1269.94	1109.92	188.777
44	31	noIR	181112	4	WT	exp1	no IR	0	754.785	105.299	70.1379
44	32	noIR	181112	4	WT	exp1	no IR	13	1163.24	1375.85	168.715
44	33	noIR	181112	4	WT	exp1	no IR	20	1818.55	1066.88	282.183
44	34	noIR	181112	4	WT	exp1	no IR	27	1761.25	1560.79	261.773
44	35	noIR	181112	4	WT	exp1	no IR	14	1270.73	1117.51	163.502
44	36	noIR	181112	4	WT	exp1	no IR	17	1775.49	1415.17	280.944
44	37	noIR	181112	4	WT	exp1	no IR	4	993.789	167.893	138.067
44	38	noIR	181112	4	WT	exp1	no IR	27	1531.23	1314.53	271.009
44	39	noIR	181112	4	WT	exp1	no IR	0	864.991	97.3037	79.8188
44	40	noIR	181112	4	WT	exp1	no IR	19	1009.15	715.706	140.936
44	41	noIR	181112	4	WT	exp1	no IR	19	1346.66	1176.49	201.558
44	42	noIR	181112	4	WT	exp1	no IR	0	959.822	107.151	92.0409
44	43	noIR	181112	4	WT	exp1	no IR	16	1356.52	931.585	222.326
44	44	noIR	181112	4	WT	exp1	no IR	5	1015.27	151.378	130.383
44	45	noIR	181112	4	WT	exp1	no IR	29	1878.88	1931.7	303.77
44	46	noIR	181112	4	WT	exp1	no IR	0	793.955	95.7347	69.1307
44	47	noIR	181112	4	WT	exp1	no IR	22	1166.87	1205.15	188.263
44	48	noIR	181112	4	WT	exp1	no IR	25	1203.56	1226.68	211.51
44	49	noIR	181112	4	WT	exp1	no IR	0	1881.75	339.677	227.913
44	50	noIR	181112	4	WT	exp1	no IR	1	901.689	442.955	71.7423
44	51	noIR	181112	4	WT	exp1	no IR	0	893.367	107.532	84.422
44	52	noIR	181112	4	WT	exp1	no IR	13	1066.61	1193.54	146.565
44	53	noIR	181112	4	WT	exp1	no IR	20	1280.55	1021.82	210.632
44	54	noIR	181112	4	WT	exp1	no IR	12	1382.07	421.107	183.032
44	55	noIR	181112	4	WT	exp1	no IR	42	2666.24	2247.34	424.017
44	56	noIR	181112	4	WT	exp1	no IR	28	1917.01	1612.65	321.954
44	57	noIR	181112	4	WT	exp1	no IR	19	917.749	1262.36	165.573
44	58	noIR	181112	4	WT	exp1	no IR	12	3024.44	1203.3	344.077
44	59	noIR	181112	4	WT	exp1	no IR	21	1054.54	1135.57	182.557
45	1	noIR	181112	4	dCTD	exp1	no IR	0	442.185	66.9308	45.0092
45	2	noIR	181112	4	dCTD	exp1	no IR	22	822.638	1679.56	183.811
45	3	noIR	181112	4	dCTD	exp1	no IR	4	503.312	934.126	79.3226
45	4	noIR	181112	4	dCTD	exp1	no IR	8	340.856	538.239	65.0038
45	5	noIR	181112	4	dCTD	exp1	no IR	8	1132.93	622.883	162.6
45	6	noIR	181112	4	dCTD	exp1	no IR	4	924.825	691.689	134.95
45	7	noIR	181112	4	dCTD	exp1	no IR	0	501.834	124.821	48.5691
45	8	noIR	181112	4	dCTD	exp1	no IR	2	668.746	690.463	93.6328
45	9	noIR	181112	4	dCTD	exp1	no IR	24	972.713	1411.21	187.037
45	10	noIR	181112	4	dCTD	exp1	no IR	19	732.043	147.402	119.256
45	11	noIR	181112	4	dCTD	exp1	no IR	16	1296.38	1393.63	170.441
45	12	noIR	181112	4	dCTD	exp1	no IR	17	1048.76	1217.98	162.047
45	13	noIR	181112	4	dCTD	exp1	no IR	2	791.153	694.348	99.6442
45	14	noIR	181112	4	dCTD	exp1	no IR	20	1134.97	1061.41	196.036
45	15	noIR	181112	4	dCTD	exp1	no IR	2	702.502	687.715	85.9251
45	16	noIR	181112	4	dCTD	exp1	no IR	0	774.354	146.575	89.3568
45	17	noIR	181112	4	dCTD	exp1	no IR	19	870.239	160.978	133.602
45	18	noIR	181112	4	dCTD	exp1	no IR	2	577.819	560.207	71.7929
45	19	noIR	181112	4	dCTD	exp1	no IR	8	1344	247.425	158.466
45	20	noIR	181112	4	dCTD	exp1	no IR	8	1510.67	926.338	212.79
45	21	noIR	181112	4	dCTD	exp1	no IR	15	937.974	1407.04	146.148
45	22	noIR	181112	4	dCTD	exp1	no IR	15	831.15	944.908	149.409
45	23	noIR	181112	4	dCTD	exp1	no IR	7	1644.98	709.505	186.905
45	24	noIR	181112	4	dCTD	exp1	no IR	4	911.862	699.755	106.887
45	25	noIR	181112	4	dCTD	exp1	no IR	9	890.555	1013.55	151.441
45	26	noIR	181112	4	dCTD	exp1	no IR	18	1339.18	1016.4	193.446
45	27	noIR	181112	4	dCTD	exp1	no IR	18	967.975	1208.02	148.368
45	28	noIR	181112	4	dCTD	exp1	no IR	10	1577.67	332.333	180.487
45	29	noIR	181112	4	dCTD	exp1	no IR	8	1662.77	1343.39	178.745
45	30	noIR	181112	4	dCTD	exp1	no IR	28	1311.3	1791.48	243.975
45	31	noIR	181112	4	dCTD	exp1	no IR	19	1126.3	1587.03	192.395
45	32	noIR	181112	4	dCTD	exp1	no IR	0	938.143	150.444	91.0432
45	33	noIR	181112	4	dCTD	exp1	no IR	19	1311.8	1415.82	175.272
45	34	noIR	181112	4	dCTD	exp1	no IR	25	1445.68	1145.3	221.547
45	35	noIR	181112	4	dCTD	exp1	no IR	15	945.566	820.026	127.401
45	36	noIR	181112	4	dCTD	exp1	no IR	14	1447.06	1454.58	198.194
45	37	noIR	181112	4	dCTD	exp1	no IR	17	1975.92	1065.04	232.746
45	38	noIR	181112	4	dCTD	exp1	no IR	6	1307.5	1134.83	129.783
45	39	noIR	181112	4	dCTD	exp1	no IR	1	1733.6	279.248	156.599
45	40	noIR	181112	4	dCTD	exp1	no IR	25	3485.78	1217.67	358.84
45	41	noIR	181112	4	dCTD	exp1	no IR	22	2010.08	1570.65	199.059
45	42	noIR	181112	4	dCTD	exp1	no IR	19	1511.85	1407.5	181.223
45	43	noIR	181112	4	dCTD	exp1	no IR	0	986.794	157.43	86.5485
45	44	noIR	181112	4	dCTD	exp1	no IR	9	2058.77	1133.52	182.734
45	45	noIR	181112	4	dCTD	exp1	no IR	19	1020.53	494.13	143.204
45	46	noIR	181112	4	dCTD	exp1	no IR	7	598.777	277.781	85.0029
45	47	noIR	181112	4	dCTD	exp1	no IR	19	1772.06	950.404	229.249
45	48	noIR	181112	4	dCTD	exp1	no IR	24	1291.11	509.269	179.306
45	49	noIR	181112	4	dCTD	exp1	no IR	3	1198.77	357.836	82.6313
45	50	noIR	181112	4	dCTD	exp1	no IR	17	1141.51	815.805	162.729
45	51	noIR	181112	4	dCTD	exp1	no IR	1	701.372	126.966	53.9202
45	52	noIR	181112	4	dCTD	exp1	no IR	11	1339.84	2119.56	180.228
45	53	noIR	181112	4	dCTD	exp1	no IR	3	1042.01	741.8	124.047
45	54	noIR	181112	4	dCTD	exp1	no IR	12	1209.04	480.651	150.226
46	1	noIR	181112	4	dDBD	exp1	no IR	1	600.081	159.245	109.179
46	2	noIR	181112	4	dDBD	exp1	no IR	10	606.513	506.095	107.58
46	3	noIR	181112	4	dDBD	exp1	no IR	22	1325.39	1196.68	305.106
46	4	noIR	181112	4	dDBD	exp1	no IR	25	1575.99	1195.49	303.309
46	5	noIR	181112	4	dDBD	exp1	no IR	20	1358.98	1096.76	270.91
46	6	noIR	181112	4	dDBD	exp1	no IR	5	1266.37	298.924	214.814
46	7	noIR	181112	4	dDBD	exp1	no IR	26	1052.75	1444.31	219.803
46	8	noIR	181112	4	dDBD	exp1	no IR	22	1114.66	1548.47	199.233
46	9	noIR	181112	4	dDBD	exp1	no IR	25	1157.5	2130.1	251.277
46	10	noIR	181112	4	dDBD	exp1	no IR	18	1086.54	1566.22	186.285
46	11	noIR	181112	4	dDBD	exp1	no IR	34	1832.27	1506.1	343.349
46	12	noIR	181112	4	dDBD	exp1	no IR	17	1635.24	1549.46	248.866
46	13	noIR	181112	4	dDBD	exp1	no IR	33	1688.25	1624.65	339.114
46	14	noIR	181112	4	dDBD	exp1	no IR	15	977.406	453.202	154.533
46	15	noIR	181112	4	dDBD	exp1	no IR	23	1281.24	1621.17	221.966
46	16	noIR	181112	4	dDBD	exp1	no IR	22	1468.14	1518.56	234.824
46	17	noIR	181112	4	dDBD	exp1	no IR	14	2138.47	1254.77	310.777
46	18	noIR	181112	4	dDBD	exp1	no IR	35	1368.23	1772.38	260.904
46	19	noIR	181112	4	dDBD	exp1	no IR	16	1061.25	540.296	159.505
46	20	noIR	181112	4	dDBD	exp1	no IR	17	1053.75	1172.11	215.549
46	21	noIR	181112	4	dDBD	exp1	no IR	21	2100.45	1578.51	265.485
46	22	noIR	181112	4	dDBD	exp1	no IR	16	1084.6	1207.68	216.319
46	23	noIR	181112	4	dDBD	exp1	no IR	11	1345.41	1047.91	197.886
46	24	noIR	181112	4	dDBD	exp1	no IR	21	1177.1	1292.69	199.331
46	25	noIR	181112	4	dDBD	exp1	no IR	20	2255.6	1758.12	251.026
46	26	noIR	181112	4	dDBD	exp1	no IR	26	1879.22	1414.66	247.735
46	27	noIR	181112	4	dDBD	exp1	no IR	38	1833.24	1680.66	330.411
46	28	noIR	181112	4	dDBD	exp1	no IR	13	1415.76	967.762	166.913
46	29	noIR	181112	4	dDBD	exp1	no IR	23	1244.68	1344.87	225.691
46	30	noIR	181112	4	dDBD	exp1	no IR	12	1310.52	1129.87	169.062
46	31	noIR	181112	4	dDBD	exp1	no IR	1	1160.98	208.824	124.206
46	32	noIR	181112	4	dDBD	exp1	no IR	14	1297.58	1032.06	184.509
46	33	noIR	181112	4	dDBD	exp1	no IR	26	1737.72	1296.27	262.97
46	34	noIR	181112	4	dDBD	exp1	no IR	9	1398.18	738.64	184.803
46	35	noIR	181112	4	dDBD	exp1	no IR	33	1495.76	1562.75	289.661
46	36	noIR	181112	4	dDBD	exp1	no IR	0	1312.6	283.028	103.546
46	37	noIR	181112	4	dDBD	exp1	no IR	5	1377.07	235.218	155.257
46	38	noIR	181112	4	dDBD	exp1	no IR	13	1916.57	271.857	210.912
46	39	noIR	181112	4	dDBD	exp1	no IR	14	945.457	1343.62	165.62
46	40	noIR	181112	4	dDBD	exp1	no IR	2	1103.97	229.9	132.496
47	1	noIR	181112	4	dDBDdCTD	exp1	no IR	21	844.215	1533.33	186.097
47	2	noIR	181112	4	dDBDdCTD	exp1	no IR	22	1216.19	653.564	221.51
47	3	noIR	181112	4	dDBDdCTD	exp1	no IR	0	1663.22	360.323	166.885
47	4	noIR	181112	4	dDBDdCTD	exp1	no IR	25	1009.02	1717.81	210.941
47	5	noIR	181112	4	dDBDdCTD	exp1	no IR	27	1070.55	1717.23	220.814
47	6	noIR	181112	4	dDBDdCTD	exp1	no IR	9	1921.28	553.928	235.747
47	7	noIR	181112	4	dDBDdCTD	exp1	no IR	28	1091.29	1490.06	214.017
47	8	noIR	181112	4	dDBDdCTD	exp1	no IR	28	1272.05	1961.33	236.077
47	9	noIR	181112	4	dDBDdCTD	exp1	no IR	33	1319.27	1774.59	251.352
47	10	noIR	181112	4	dDBDdCTD	exp1	no IR	14	1079.85	1210.64	159.237
47	11	noIR	181112	4	dDBDdCTD	exp1	no IR	17	1068.93	1484.95	205.395
47	12	noIR	181112	4	dDBDdCTD	exp1	no IR	15	2121.62	424.998	248.477
47	13	noIR	181112	4	dDBDdCTD	exp1	no IR	13	1125.9	1354.31	177.554
47	14	noIR	181112	4	dDBDdCTD	exp1	no IR	31	1209.37	1278.48	221.82
48	1	24hIR	181116	1	WT	exp1	24h	0	491.988	50.2208	36.4541
48	2	24hIR	181116	1	WT	exp1	24h	0	991.18	165.526	142.538
48	3	24hIR	181116	1	WT	exp1	24h	1	613.141	121.085	97.5001
48	4	24hIR	181116	1	WT	exp1	24h	7	691.32	1595.92	91.9193
48	5	24hIR	181116	1	WT	exp1	24h	1	1291.13	150.307	139.156
48	6	24hIR	181116	1	WT	exp1	24h	2	1044.67	937.111	105.109
48	7	24hIR	181116	1	WT	exp1	24h	23	1129.59	1594.54	193.626
48	8	24hIR	181116	1	WT	exp1	24h	5	590.811	1974.41	89.6022
48	9	24hIR	181116	1	WT	exp1	24h	9	706.842	2013.32	101.922
48	10	24hIR	181116	1	WT	exp1	24h	26	1166.97	513.809	162.777
48	11	24hIR	181116	1	WT	exp1	24h	35	2109.94	2985.56	341.528
48	12	24hIR	181116	1	WT	exp1	24h	11	2170.16	339.05	232.247
48	13	24hIR	181116	1	WT	exp1	24h	4	737.2	501.11	121.125
48	14	24hIR	181116	1	WT	exp1	24h	9	792.504	1685.55	91.3948
48	15	24hIR	181116	1	WT	exp1	24h	2	830.716	84.3453	78.612
48	16	24hIR	181116	1	WT	exp1	24h	0	875.897	90.6201	68.8144
48	17	24hIR	181116	1	WT	exp1	24h	4	572.761	61.6228	56.8071
48	18	24hIR	181116	1	WT	exp1	24h	2	553.643	54.2206	54.9148
48	19	24hIR	181116	1	WT	exp1	24h	5	938.345	336.463	166.066
48	20	24hIR	181116	1	WT	exp1	24h	26	4085.45	2293.84	419.856
48	21	24hIR	181116	1	WT	exp1	24h	0	740.795	66.6616	62.467
48	22	24hIR	181116	1	WT	exp1	24h	70	3364.38	3360.52	471.046
48	23	24hIR	181116	1	WT	exp1	24h	6	759.482	116.661	92.4176
48	24	24hIR	181116	1	WT	exp1	24h	15	1295.49	501.893	131.843
48	25	24hIR	181116	1	WT	exp1	24h	11	747.94	1589.43	94.5276
48	26	24hIR	181116	1	WT	exp1	24h	1	775.407	287.328	75.0643
48	27	24hIR	181116	1	WT	exp1	24h	20	1002.84	1698.42	139.062
48	28	24hIR	181116	1	WT	exp1	24h	18	955.192	1149.62	164.434
48	29	24hIR	181116	1	WT	exp1	24h	9	773.345	1227.82	87.4811
48	30	24hIR	181116	1	WT	exp1	24h	11	2155.55	884.825	216.351
48	31	24hIR	181116	1	WT	exp1	24h	5	1686.27	232.217	186.762
48	32	24hIR	181116	1	WT	exp1	24h	30	1845.61	2691.78	226.995
48	33	24hIR	181116	1	WT	exp1	24h	10	816.434	456.131	93.4517
48	34	24hIR	181116	1	WT	exp1	24h	10	690.627	126.992	83.2136
48	35	24hIR	181116	1	WT	exp1	24h	68	2848.5	3178.14	369.295
48	36	24hIR	181116	1	WT	exp1	24h	5	883.229	129.351	92.8653
48	37	24hIR	181116	1	WT	exp1	24h	13	785.246	1389.24	110.317
48	38	24hIR	181116	1	WT	exp1	24h	9	1142.12	198.169	119.317
48	39	24hIR	181116	1	WT	exp1	24h	17	1813.93	177.241	172.919
48	40	24hIR	181116	1	WT	exp1	24h	32	1949.79	2664.51	204.624
48	41	24hIR	181116	1	WT	exp1	24h	11	1501.53	169.269	133.69
48	42	24hIR	181116	1	WT	exp1	24h	11	1638.29	1182.48	193.901
48	43	24hIR	181116	1	WT	exp1	24h	3	1204.76	92.5305	95.7987
48	44	24hIR	181116	1	WT	exp1	24h	13	2030.55	173.391	189.911
48	45	24hIR	181116	1	WT	exp1	24h	21	2263.89	2782.84	268.261
48	46	24hIR	181116	1	WT	exp1	24h	7	685.227	75.5382	81.5234
48	47	24hIR	181116	1	WT	exp1	24h	14	711.006	1220.27	87.4478
49	1	24hIR	181116	1	dCTD	exp1	24h	2	261.626	431.621	33.1681
49	2	24hIR	181116	1	dCTD	exp1	24h	2	602.242	682.332	73.6127
49	3	24hIR	181116	1	dCTD	exp1	24h	0	1057.76	209.102	150.354
49	4	24hIR	181116	1	dCTD	exp1	24h	36	662.643	2918.32	136.053
49	5	24hIR	181116	1	dCTD	exp1	24h	4	1630.96	660.33	164.132
49	6	24hIR	181116	1	dCTD	exp1	24h	6	988.964	1074.25	110.681
49	7	24hIR	181116	1	dCTD	exp1	24h	10	630.836	1009.78	81.9258
49	8	24hIR	181116	1	dCTD	exp1	24h	27	723.263	3150.44	160.032
49	9	24hIR	181116	1	dCTD	exp1	24h	2	962.801	1453.33	93.5303
49	10	24hIR	181116	1	dCTD	exp1	24h	33	787.069	3098.12	155.491
49	11	24hIR	181116	1	dCTD	exp1	24h	19	848.216	1658.18	122.904
49	12	24hIR	181116	1	dCTD	exp1	24h	2	1255.71	997.248	96.9299
49	13	24hIR	181116	1	dCTD	exp1	24h	0	766.169	165.893	54.8979
49	14	24hIR	181116	1	dCTD	exp1	24h	22	925.142	2402.79	141.761
49	15	24hIR	181116	1	dCTD	exp1	24h	0	532.109	51.5568	38.6852
49	16	24hIR	181116	1	dCTD	exp1	24h	24	1941.26	673.931	196.594
49	17	24hIR	181116	1	dCTD	exp1	24h	7	603.654	471.97	60.4605
49	18	24hIR	181116	1	dCTD	exp1	24h	18	1270.54	2009.3	124.278
49	19	24hIR	181116	1	dCTD	exp1	24h	1	2570.71	311.953	263.655
49	20	24hIR	181116	1	dCTD	exp1	24h	16	1459.09	2970.48	186.634
49	21	24hIR	181116	1	dCTD	exp1	24h	1	1818.99	449.927	153.766
49	22	24hIR	181116	1	dCTD	exp1	24h	1	966.377	105.82	94.475
49	23	24hIR	181116	1	dCTD	exp1	24h	34	817.109	2617.93	130.869
49	24	24hIR	181116	1	dCTD	exp1	24h	13	1327.59	2691.53	134.021
49	25	24hIR	181116	1	dCTD	exp1	24h	14	1616.35	3679.26	177.592
49	26	24hIR	181116	1	dCTD	exp1	24h	17	784.397	2567.33	125.793
49	27	24hIR	181116	1	dCTD	exp1	24h	33	2034.44	1102.79	215.466
49	28	24hIR	181116	1	dCTD	exp1	24h	35	1042.07	3526.31	160.007
49	29	24hIR	181116	1	dCTD	exp1	24h	0	878.098	86.7896	81.5627
49	30	24hIR	181116	1	dCTD	exp1	24h	39	1126.24	3538.12	165.566
49	31	24hIR	181116	1	dCTD	exp1	24h	23	2011.83	2113.5	183.833
49	32	24hIR	181116	1	dCTD	exp1	24h	13	713.486	1639.72	88.4016
49	33	24hIR	181116	1	dCTD	exp1	24h	17	1454.05	2865.3	142.953
49	34	24hIR	181116	1	dCTD	exp1	24h	17	1335.18	2935.9	164.85
49	35	24hIR	181116	1	dCTD	exp1	24h	18	851.605	2493.92	127.265
49	36	24hIR	181116	1	dCTD	exp1	24h	2	1742.84	167.326	122.023
49	37	24hIR	181116	1	dCTD	exp1	24h	0	1023.62	600.488	120.492
49	38	24hIR	181116	1	dCTD	exp1	24h	19	1219.17	1058.23	136.801
50	1	24hIR	181116	1	dDBD	exp1	24h	2	686.125	654.042	118.163
50	2	24hIR	181116	1	dDBD	exp1	24h	79	2442.25	3505.95	405.897
50	3	24hIR	181116	1	dDBD	exp1	24h	0	681.504	100.324	90.8904
50	4	24hIR	181116	1	dDBD	exp1	24h	29	671.57	946.865	126.129
50	5	24hIR	181116	1	dDBD	exp1	24h	44	1361.05	1886.58	213.655
50	6	24hIR	181116	1	dDBD	exp1	24h	20	742.326	846.788	134.361
50	7	24hIR	181116	1	dDBD	exp1	24h	16	1513.36	184.793	197.188
50	8	24hIR	181116	1	dDBD	exp1	24h	5	237.68	175.871	34.3418
50	9	24hIR	181116	1	dDBD	exp1	24h	53	1769.05	2872	300.483
50	10	24hIR	181116	1	dDBD	exp1	24h	10	731.727	1585.41	119.264
50	11	24hIR	181116	1	dDBD	exp1	24h	17	1947.64	231.785	222.506
50	12	24hIR	181116	1	dDBD	exp1	24h	49	1904.77	2748.87	331.471
50	13	24hIR	181116	1	dDBD	exp1	24h	25	1664.16	1767.3	189.878
50	14	24hIR	181116	1	dDBD	exp1	24h	24	820.533	1662.53	150.259
50	15	24hIR	181116	1	dDBD	exp1	24h	16	1016.17	1569.03	134.273
50	16	24hIR	181116	1	dDBD	exp1	24h	17	2292.37	217.566	198.046
50	17	24hIR	181116	1	dDBD	exp1	24h	7	1149.48	1111.08	104.727
50	18	24hIR	181116	1	dDBD	exp1	24h	15	827.137	816.598	80.8716
50	19	24hIR	181116	1	dDBD	exp1	24h	27	921.446	1590.38	162.981
50	20	24hIR	181116	1	dDBD	exp1	24h	15	730.229	1436.21	110.358
50	21	24hIR	181116	1	dDBD	exp1	24h	15	1168	1610.71	122.905
50	22	24hIR	181116	1	dDBD	exp1	24h	1	1888.4	175.703	135.434
50	23	24hIR	181116	1	dDBD	exp1	24h	29	1580.45	2057.34	179.802
50	24	24hIR	181116	1	dDBD	exp1	24h	0	2076.46	249.954	191.682
50	25	24hIR	181116	1	dDBD	exp1	24h	24	2028.96	2729.64	201.57
50	26	24hIR	181116	1	dDBD	exp1	24h	0	614.307	55.2712	44.0747
50	27	24hIR	181116	1	dDBD	exp1	24h	0	862.325	117.66	102.242
50	28	24hIR	181116	1	dDBD	exp1	24h	1	827.477	106.512	90.5627
50	29	24hIR	181116	1	dDBD	exp1	24h	3	725.506	79.7495	69.9724
50	30	24hIR	181116	1	dDBD	exp1	24h	35	1321.16	1080.89	545.144
51	1	24hIR	181116	1	dDBDdCTD	exp1	24h	23	1983.13	406.095	624.135
51	2	24hIR	181116	1	dDBDdCTD	exp1	24h	1	495.873	398.828	67.6357
51	3	24hIR	181116	1	dDBDdCTD	exp1	24h	0	299.399	90.8154	54.1426
51	4	24hIR	181116	1	dDBDdCTD	exp1	24h	19	717.11	1574.69	217.975
51	5	24hIR	181116	1	dDBDdCTD	exp1	24h	0	298.159	75.2016	44.6754
51	6	24hIR	181116	1	dDBDdCTD	exp1	24h	23	633.199	2191.99	104.582
51	7	24hIR	181116	1	dDBDdCTD	exp1	24h	0	317.633	76.6231	44.4338
51	8	24hIR	181116	1	dDBDdCTD	exp1	24h	3	797.729	490.379	87.8083
51	9	24hIR	181116	1	dDBDdCTD	exp1	24h	3	1501.12	318.255	196.26
51	10	24hIR	181116	1	dDBDdCTD	exp1	24h	10	1839.68	341.335	223.761
51	11	24hIR	181116	1	dDBDdCTD	exp1	24h	29	2154.73	389.303	271.346
51	12	24hIR	181116	1	dDBDdCTD	exp1	24h	3	1335.1	281.275	215.121
51	13	24hIR	181116	1	dDBDdCTD	exp1	24h	39	1761.47	1395.61	205.377
51	14	24hIR	181116	1	dDBDdCTD	exp1	24h	3	1156.11	165.01	104.6
51	15	24hIR	181116	1	dDBDdCTD	exp1	24h	15	813.728	731.855	107.029
51	16	24hIR	181116	1	dDBDdCTD	exp1	24h	40	1092.05	1580.39	128.524
51	17	24hIR	181116	1	dDBDdCTD	exp1	24h	9	585.774	577.742	80.0908
51	18	24hIR	181116	1	dDBDdCTD	exp1	24h	46	1099.51	1929.74	150.402
51	19	24hIR	181116	1	dDBDdCTD	exp1	24h	27	892.096	1807.99	125.374
52	1	24hIR	181116	2	WT	exp1	24h	11	550.591	1335.95	88.3229
52	2	24hIR	181116	2	WT	exp1	24h	3	1058.5	120.286	97.8008
52	3	24hIR	181116	2	WT	exp1	24h	4	1630.21	209.64	178.57
52	4	24hIR	181116	2	WT	exp1	24h	15	860.63	1824.52	107.465
52	5	24hIR	181116	2	WT	exp1	24h	0	1634.08	190.258	132.132
52	6	24hIR	181116	2	WT	exp1	24h	9	1805.25	1056.08	174.339
52	7	24hIR	181116	2	WT	exp1	24h	3	1266.36	127.71	106.029
52	8	24hIR	181116	2	WT	exp1	24h	14	1132.51	1492.72	116.248
52	9	24hIR	181116	2	WT	exp1	24h	17	1262.4	1418.09	139.208
52	10	24hIR	181116	2	WT	exp1	24h	5	1188.88	1482.16	131.148
52	11	24hIR	181116	2	WT	exp1	24h	31	1728.63	290.828	237.28
52	12	24hIR	181116	2	WT	exp1	24h	7	288.637	37.1335	69.2561
52	13	24hIR	181116	2	WT	exp1	24h	13	1218.43	1577.85	104.904
52	14	24hIR	181116	2	WT	exp1	24h	1	1322.6	103.506	74.9008
52	15	24hIR	181116	2	WT	exp1	24h	0	1218.58	97.27	67.7639
52	16	24hIR	181116	2	WT	exp1	24h	0	712.27	72.3085	52.6521
[truncated: 4,872 more rows]
