# Supplementary material for: Role of BRCA2 DNA-binding and C-terminal domain in its mobility and conformation in DNA repair
Source: eLife. 2021 Jul 13;10:e67926. doi: 10.7554/eLife.67926 (PMC8324294; doi:10.7554/eLife.67926)
Supplement: Figure 3—source data 1. [file elife-67926-fig3-data1.xlsx]

## Sheet: Summary statistics
Figure 3
	condition	N tracks	N cells	N exp
Full-length	-IR	9944	16	2
Full-length	+IR	13761	16	2
dDBD	-IR	9399	17	2
dDBD	+IR	11325	15	2
dCTD	-IR	9199	15	2
dCTD	+IR	9494	16	2
dDBDdCTD	-IR	9997	17	2
dDBDdCTD	+IR	12249	19	2
Figure 3D
group1	group2	p (two-sided t-test)
Full-length	dDBD	0.953
Full-length	dCTD	0.797
Full-length	dDBDdCTD	0.593
Figure 3E	p-values of two-sided t-test comparing immobile fraction - and + IR treatment per genotype
	-/+ IR
	WT p=0.08
	dD p=0.057
	dC p=0.02
	dDdC p =0.4
	p-values of two-sided t-test comparing immobile fraction of untreated cells
	-IR compared with WT
	dD= 0.64
	dC 0.8
	dDdC = 0.6

## Sheet: Description of source data
This is the source data for Figure 3
Single-molecule tracking data analyzed using scripts at						https://github.com/maartenpaul/DBD_tracking
The data contains all tracklets (segmented track fragments with similar mobility pattern)
State 0 = mobile
State 1 = slow
State 2 = immobile

## Sheet: WT -IR
cellID	condition	tracklet ID	D[um/s2]	Smmss	frame	state
001 30ms181005 BRCA2-Halo PCNA-iRFP IR tracking	WT G10 -IR	5.2	0.0473573	0.53183	3	1
001 30ms181005 BRCA2-Halo PCNA-iRFP IR tracking	WT G10 -IR	7.1	0.802669	0.567491	0	0
001 30ms181005 BRCA2-Halo PCNA-iRFP IR tracking	WT G10 -IR	9.1	0.633561	0.630366	9	0
001 30ms181005 BRCA2-Halo PCNA-iRFP IR tracking	WT G10 -IR	12.4	1.3157	0.213476	14	0
001 30ms181005 BRCA2-Halo PCNA-iRFP IR tracking	WT G10 -IR	13.1	1.05027	0.482929	11	0
001 30ms181005 BRCA2-Halo PCNA-iRFP IR tracking	WT G10 -IR	18.1	0.00109346	0.148063	0	2
001 30ms181005 BRCA2-Halo PCNA-iRFP IR tracking	WT G10 -IR	20.4	0.00226704	0.140545	9	2
001 30ms181005 BRCA2-Halo PCNA-iRFP IR tracking	WT G10 -IR	21.3	0.509006	0.490792	4	0
001 30ms181005 BRCA2-Halo PCNA-iRFP IR tracking	WT G10 -IR	23.2	0.00637391	0.150969	40	1
001 30ms181005 BRCA2-Halo PCNA-iRFP IR tracking	WT G10 -IR	30.2	0.00842095	0.112819	75	1
001 30ms181005 BRCA2-Halo PCNA-iRFP IR tracking	WT G10 -IR	32.3	0.00523194	0.116008	9	1
001 30ms181005 BRCA2-Halo PCNA-iRFP IR tracking	WT G10 -IR	32.5	0.0109086	0.35382	29	1
001 30ms181005 BRCA2-Halo PCNA-iRFP IR tracking	WT G10 -IR	32.6	0.00529306	0.248501	48	2
001 30ms181005 BRCA2-Halo PCNA-iRFP IR tracking	WT G10 -IR	32.7	0.0167361	0.246064	71	1
001 30ms181005 BRCA2-Halo PCNA-iRFP IR tracking	WT G10 -IR	36.1	0.0022281	-0.0228782	0	2
001 30ms181005 BRCA2-Halo PCNA-iRFP IR tracking	WT G10 -IR	38.1	0.000478997	0.0898163	70	2
001 30ms181005 BRCA2-Halo PCNA-iRFP IR tracking	WT G10 -IR	41.2	0.254788	0.445085	105	1
001 30ms181005 BRCA2-Halo PCNA-iRFP IR tracking	WT G10 -IR	42.4	0.00702202	0.400963	123	2
001 30ms181005 BRCA2-Halo PCNA-iRFP IR tracking	WT G10 -IR	43.1	0.371192	-0.042852	103	0
001 30ms181005 BRCA2-Halo PCNA-iRFP IR tracking	WT G10 -IR	46.1	1.91443	0.295386	109	0
001 30ms181005 BRCA2-Halo PCNA-iRFP IR tracking	WT G10 -IR	47.2	0.00667564	0.288316	104	2
001 30ms181005 BRCA2-Halo PCNA-iRFP IR tracking	WT G10 -IR	50.2	0.016595	0.37853	135	2
001 30ms181005 BRCA2-Halo PCNA-iRFP IR tracking	WT G10 -IR	50.6	0.00590918	0.244204	160	2
001 30ms181005 BRCA2-Halo PCNA-iRFP IR tracking	WT G10 -IR	51.1	0.000585234	-0.141947	131	2
001 30ms181005 BRCA2-Halo PCNA-iRFP IR tracking	WT G10 -IR	52.1	0.590242	0.203195	121	0
001 30ms181005 BRCA2-Halo PCNA-iRFP IR tracking	WT G10 -IR	53.2	0.00102156	0.0716855	122	2
001 30ms181005 BRCA2-Halo PCNA-iRFP IR tracking	WT G10 -IR	64.1	0.132549	0.218982	149	1
001 30ms181005 BRCA2-Halo PCNA-iRFP IR tracking	WT G10 -IR	64.3	0.00627697	0.0722678	167	1
001 30ms181005 BRCA2-Halo PCNA-iRFP IR tracking	WT G10 -IR	67.1	0.00235853	0.0909897	0	2
001 30ms181005 BRCA2-Halo PCNA-iRFP IR tracking	WT G10 -IR	72.1	0.41597	-0.169158	149	0
001 30ms181005 BRCA2-Halo PCNA-iRFP IR tracking	WT G10 -IR	72.5	0.596879	0.42052	172	0
001 30ms181005 BRCA2-Halo PCNA-iRFP IR tracking	WT G10 -IR	73.1	1.53745	0.428304	190	0
001 30ms181005 BRCA2-Halo PCNA-iRFP IR tracking	WT G10 -IR	74.1	2.27304	0.50209	201	0
001 30ms181005 BRCA2-Halo PCNA-iRFP IR tracking	WT G10 -IR	77.1	0.395288	0.487878	202	0
001 30ms181005 BRCA2-Halo PCNA-iRFP IR tracking	WT G10 -IR	78.1	4.64721	0.668539	199	0
001 30ms181005 BRCA2-Halo PCNA-iRFP IR tracking	WT G10 -IR	80.1	1.22547	0.472818	183	0
001 30ms181005 BRCA2-Halo PCNA-iRFP IR tracking	WT G10 -IR	80.3	2.02125	0.309398	206	0
001 30ms181005 BRCA2-Halo PCNA-iRFP IR tracking	WT G10 -IR	83.1	1.27727	0.403088	210	0
001 30ms181005 BRCA2-Halo PCNA-iRFP IR tracking	WT G10 -IR	85.1	1.16266	0.187257	231	0
001 30ms181005 BRCA2-Halo PCNA-iRFP IR tracking	WT G10 -IR	91.1	0.785334	0.446482	221	0
001 30ms181005 BRCA2-Halo PCNA-iRFP IR tracking	WT G10 -IR	91.2	0.00942732	0.445605	234	2
001 30ms181005 BRCA2-Halo PCNA-iRFP IR tracking	WT G10 -IR	93.1	0.663844	0.216387	217	0
001 30ms181005 BRCA2-Halo PCNA-iRFP IR tracking	WT G10 -IR	96.1	2.96792	0.664165	252	0
001 30ms181005 BRCA2-Halo PCNA-iRFP IR tracking	WT G10 -IR	98.1	0.675363	0.474903	252	0
001 30ms181005 BRCA2-Halo PCNA-iRFP IR tracking	WT G10 -IR	99.1	0.423505	0.17758	255	0
001 30ms181005 BRCA2-Halo PCNA-iRFP IR tracking	WT G10 -IR	100.1	1.09608	0.448161	255	0
001 30ms181005 BRCA2-Halo PCNA-iRFP IR tracking	WT G10 -IR	101.1	0.00350321	0.319684	253	2
001 30ms181005 BRCA2-Halo PCNA-iRFP IR tracking	WT G10 -IR	105.11	0.109937	0.567944	330	1
001 30ms181005 BRCA2-Halo PCNA-iRFP IR tracking	WT G10 -IR	105.16	0.446058	0.251538	375	1
001 30ms181005 BRCA2-Halo PCNA-iRFP IR tracking	WT G10 -IR	105.2	0.208297	0.457433	249	1
001 30ms181005 BRCA2-Halo PCNA-iRFP IR tracking	WT G10 -IR	105.4	0.0482589	0.567863	292	1
001 30ms181005 BRCA2-Halo PCNA-iRFP IR tracking	WT G10 -IR	105.6	0.00481046	0.111835	308	2
001 30ms181005 BRCA2-Halo PCNA-iRFP IR tracking	WT G10 -IR	109.3	0.0123137	0.237505	265	1
001 30ms181005 BRCA2-Halo PCNA-iRFP IR tracking	WT G10 -IR	109.4	0.0063629	0.236914	276	2
001 30ms181005 BRCA2-Halo PCNA-iRFP IR tracking	WT G10 -IR	109.6	0.00874079	0.268578	315	2
001 30ms181005 BRCA2-Halo PCNA-iRFP IR tracking	WT G10 -IR	113.6	0.153097	0.397852	265	1
001 30ms181005 BRCA2-Halo PCNA-iRFP IR tracking	WT G10 -IR	117.4	0.00751276	0.190013	251	2
001 30ms181005 BRCA2-Halo PCNA-iRFP IR tracking	WT G10 -IR	118.1	2.72126	0.497292	284	0
001 30ms181005 BRCA2-Halo PCNA-iRFP IR tracking	WT G10 -IR	122.1	0.999457	0.395222	308	0
001 30ms181005 BRCA2-Halo PCNA-iRFP IR tracking	WT G10 -IR	123.2	0.00231832	0.129977	257	1
001 30ms181005 BRCA2-Halo PCNA-iRFP IR tracking	WT G10 -IR	124.1	0.000835966	0.0745748	269	2
001 30ms181005 BRCA2-Halo PCNA-iRFP IR tracking	WT G10 -IR	124.3	0.00315079	0.233242	293	2
001 30ms181005 BRCA2-Halo PCNA-iRFP IR tracking	WT G10 -IR	130.1	3.33197	0.512378	315	0
001 30ms181005 BRCA2-Halo PCNA-iRFP IR tracking	WT G10 -IR	132.1	0.00578614	0.276879	293	2
001 30ms181005 BRCA2-Halo PCNA-iRFP IR tracking	WT G10 -IR	133.1	0.228995	-0.0224181	256	0
001 30ms181005 BRCA2-Halo PCNA-iRFP IR tracking	WT G10 -IR	133.1	0.0145176	0.297134	312	2
001 30ms181005 BRCA2-Halo PCNA-iRFP IR tracking	WT G10 -IR	133.8	0.00832632	0.0924888	283	2
001 30ms181005 BRCA2-Halo PCNA-iRFP IR tracking	WT G10 -IR	133.9	0.012698	0.14723	296	1
001 30ms181005 BRCA2-Halo PCNA-iRFP IR tracking	WT G10 -IR	135.1	0.321461	0.68132	331	1
001 30ms181005 BRCA2-Halo PCNA-iRFP IR tracking	WT G10 -IR	136.1	0.00301797	0.185038	347	2
001 30ms181005 BRCA2-Halo PCNA-iRFP IR tracking	WT G10 -IR	138.1	0.826116	0.458937	341	0
001 30ms181005 BRCA2-Halo PCNA-iRFP IR tracking	WT G10 -IR	142.2	0.00489033	0.332958	358	2
001 30ms181005 BRCA2-Halo PCNA-iRFP IR tracking	WT G10 -IR	143.1	0.0014466	0.121031	337	2
001 30ms181005 BRCA2-Halo PCNA-iRFP IR tracking	WT G10 -IR	145.5	1.12572	0.401574	365	0
001 30ms181005 BRCA2-Halo PCNA-iRFP IR tracking	WT G10 -IR	147.1	0.0369803	0.12956	384	1
001 30ms181005 BRCA2-Halo PCNA-iRFP IR tracking	WT G10 -IR	148.2	0.0244516	0.296676	378	2
001 30ms181005 BRCA2-Halo PCNA-iRFP IR tracking	WT G10 -IR	149.4	0.00515553	0.217845	384	2
001 30ms181005 BRCA2-Halo PCNA-iRFP IR tracking	WT G10 -IR	150.1	4.945	0.598633	402	0
001 30ms181005 BRCA2-Halo PCNA-iRFP IR tracking	WT G10 -IR	152.2	0.0036111	0.089491	339	2
001 30ms181005 BRCA2-Halo PCNA-iRFP IR tracking	WT G10 -IR	155.1	0.503756	0.250134	394	0
001 30ms181005 BRCA2-Halo PCNA-iRFP IR tracking	WT G10 -IR	160.2	0.643135	0.330756	412	0
001 30ms181005 BRCA2-Halo PCNA-iRFP IR tracking	WT G10 -IR	160.4	1.59575	0.283461	435	0
001 30ms181005 BRCA2-Halo PCNA-iRFP IR tracking	WT G10 -IR	166.2	0.00108755	0.130194	418	2
001 30ms181005 BRCA2-Halo PCNA-iRFP IR tracking	WT G10 -IR	174.1	0.135578	0.304856	412	1
001 30ms181005 BRCA2-Halo PCNA-iRFP IR tracking	WT G10 -IR	174.4	0.10969	0.425797	427	1
001 30ms181005 BRCA2-Halo PCNA-iRFP IR tracking	WT G10 -IR	175.1	3.7503	0.67016	452	0
001 30ms181005 BRCA2-Halo PCNA-iRFP IR tracking	WT G10 -IR	179.1	1.46857	0.23318	458	0
001 30ms181005 BRCA2-Halo PCNA-iRFP IR tracking	WT G10 -IR	181.6	0.135264	0.4105	444	1
001 30ms181005 BRCA2-Halo PCNA-iRFP IR tracking	WT G10 -IR	187.1	0.762896	0.169594	481	0
001 30ms181005 BRCA2-Halo PCNA-iRFP IR tracking	WT G10 -IR	190.4	1.63857	0.281165	497	0
001 30ms181005 BRCA2-Halo PCNA-iRFP IR tracking	WT G10 -IR	191.3	0.124254	0.461131	477	1
001 30ms181005 BRCA2-Halo PCNA-iRFP IR tracking	WT G10 -IR	191.4	1.47469	0.664106	492	0
001 30ms181005 BRCA2-Halo PCNA-iRFP IR tracking	WT G10 -IR	193.2	1.16986	0.588572	501	0
001 30ms181005 BRCA2-Halo PCNA-iRFP IR tracking	WT G10 -IR	196.1	1.8052	0.592986	473	0
001 30ms181005 BRCA2-Halo PCNA-iRFP IR tracking	WT G10 -IR	197.2	0.00373686	0.102961	485	2
001 30ms181005 BRCA2-Halo PCNA-iRFP IR tracking	WT G10 -IR	197.4	0.00272196	0.108164	501	2
001 30ms181005 BRCA2-Halo PCNA-iRFP IR tracking	WT G10 -IR	198.3	0.495336	0.0870437	518	0
001 30ms181005 BRCA2-Halo PCNA-iRFP IR tracking	WT G10 -IR	200.1	0.00301375	0.0555193	504	2
001 30ms181005 BRCA2-Halo PCNA-iRFP IR tracking	WT G10 -IR	200.5	0.00570232	0.130623	537	2
001 30ms181005 BRCA2-Halo PCNA-iRFP IR tracking	WT G10 -IR	200.7	0.00477253	0.130314	580	2
001 30ms181005 BRCA2-Halo PCNA-iRFP IR tracking	WT G10 -IR	201.1	0.0996375	0.503729	530	1
001 30ms181005 BRCA2-Halo PCNA-iRFP IR tracking	WT G10 -IR	201.4	0.119277	0.209014	564	0
001 30ms181005 BRCA2-Halo PCNA-iRFP IR tracking	WT G10 -IR	201.6	0.513797	0.412545	598	0
001 30ms181005 BRCA2-Halo PCNA-iRFP IR tracking	WT G10 -IR	203.7	0.020366	0.161855	548	1
001 30ms181005 BRCA2-Halo PCNA-iRFP IR tracking	WT G10 -IR	204.1	0.527853	0.163121	547	0
001 30ms181005 BRCA2-Halo PCNA-iRFP IR tracking	WT G10 -IR	205.4	0.197151	0.67953	573	1
001 30ms181005 BRCA2-Halo PCNA-iRFP IR tracking	WT G10 -IR	206.3	1.33712	0.311909	578	0
001 30ms181005 BRCA2-Halo PCNA-iRFP IR tracking	WT G10 -IR	208.2	0.210189	0.273966	636	1
001 30ms181005 BRCA2-Halo PCNA-iRFP IR tracking	WT G10 -IR	211.1	0.0053804	0.27932	577	2
001 30ms181005 BRCA2-Halo PCNA-iRFP IR tracking	WT G10 -IR	215.7	0.390962	0.0890205	655	0
001 30ms181005 BRCA2-Halo PCNA-iRFP IR tracking	WT G10 -IR	217.1	3.33028	0.492978	657	0
001 30ms181005 BRCA2-Halo PCNA-iRFP IR tracking	WT G10 -IR	218.4	0.00405916	0.176459	648	2
001 30ms181005 BRCA2-Halo PCNA-iRFP IR tracking	WT G10 -IR	219.1	0.230325	0.159254	675	0
001 30ms181005 BRCA2-Halo PCNA-iRFP IR tracking	WT G10 -IR	221.3	0.693505	0.153703	668	0
001 30ms181005 BRCA2-Halo PCNA-iRFP IR tracking	WT G10 -IR	225.2	0.0780378	0.307205	692	1
001 30ms181005 BRCA2-Halo PCNA-iRFP IR tracking	WT G10 -IR	229.1	1.88752	0.144304	708	0
001 30ms181005 BRCA2-Halo PCNA-iRFP IR tracking	WT G10 -IR	229.2	0.00941324	0.306613	721	2
001 30ms181005 BRCA2-Halo PCNA-iRFP IR tracking	WT G10 -IR	236.1	1.4783	0.420964	712	0
001 30ms181005 BRCA2-Halo PCNA-iRFP IR tracking	WT G10 -IR	237.4	0.003858	0.192334	727	2
001 30ms181005 BRCA2-Halo PCNA-iRFP IR tracking	WT G10 -IR	239.3	1.18464	0.48108	746	0
001 30ms181005 BRCA2-Halo PCNA-iRFP IR tracking	WT G10 -IR	240.1	0.182833	0.254137	751	0
001 30ms181005 BRCA2-Halo PCNA-iRFP IR tracking	WT G10 -IR	241.13	0.16052	0.112975	820	0
001 30ms181005 BRCA2-Halo PCNA-iRFP IR tracking	WT G10 -IR	241.6	0.482978	0.386782	769	1
001 30ms181005 BRCA2-Halo PCNA-iRFP IR tracking	WT G10 -IR	241.7	0.428628	0.503908	783	0
001 30ms181005 BRCA2-Halo PCNA-iRFP IR tracking	WT G10 -IR	242.2	1.05023	0.298182	780	1
001 30ms181005 BRCA2-Halo PCNA-iRFP IR tracking	WT G10 -IR	242.3	2.35028	0.3261	793	0
001 30ms181005 BRCA2-Halo PCNA-iRFP IR tracking	WT G10 -IR	244.3	1.16638	0.35281	775	0
001 30ms181005 BRCA2-Halo PCNA-iRFP IR tracking	WT G10 -IR	247.7	0.00181003	0.0382378	796	2
001 30ms181005 BRCA2-Halo PCNA-iRFP IR tracking	WT G10 -IR	248.1	0.00151008	-0.00708383	806	1
001 30ms181005 BRCA2-Halo PCNA-iRFP IR tracking	WT G10 -IR	249.1	0.627672	0.588512	819	0
001 30ms181005 BRCA2-Halo PCNA-iRFP IR tracking	WT G10 -IR	253.6	0.00161538	0.0386601	809	2
001 30ms181005 BRCA2-Halo PCNA-iRFP IR tracking	WT G10 -IR	255.2	2.78027	0.284551	853	0
001 30ms181005 BRCA2-Halo PCNA-iRFP IR tracking	WT G10 -IR	256.1	0.60097	0.119188	856	0
001 30ms181005 BRCA2-Halo PCNA-iRFP IR tracking	WT G10 -IR	257.1	0.00416175	0.255018	844	2
001 30ms181005 BRCA2-Halo PCNA-iRFP IR tracking	WT G10 -IR	261.2	0.136878	0.474469	879	1
001 30ms181005 BRCA2-Halo PCNA-iRFP IR tracking	WT G10 -IR	262.3	0.20217	0.482142	872	1
001 30ms181005 BRCA2-Halo PCNA-iRFP IR tracking	WT G10 -IR	265.3	0.00602709	0.277916	877	2
001 30ms181005 BRCA2-Halo PCNA-iRFP IR tracking	WT G10 -IR	266.7	0.00199027	0.0531773	897	2
001 30ms181005 BRCA2-Halo PCNA-iRFP IR tracking	WT G10 -IR	268.1	1.16624	0.434251	906	0
001 30ms181005 BRCA2-Halo PCNA-iRFP IR tracking	WT G10 -IR	270.6	0.135623	0.519611	932	1
001 30ms181005 BRCA2-Halo PCNA-iRFP IR tracking	WT G10 -IR	271.2	0.0200895	0.260445	908	1
001 30ms181005 BRCA2-Halo PCNA-iRFP IR tracking	WT G10 -IR	272.1	0.517166	0.347115	897	0
001 30ms181005 BRCA2-Halo PCNA-iRFP IR tracking	WT G10 -IR	275.1	0.741497	0.232764	920	0
001 30ms181005 BRCA2-Halo PCNA-iRFP IR tracking	WT G10 -IR	276.1	1.10269	0.400646	948	0
001 30ms181005 BRCA2-Halo PCNA-iRFP IR tracking	WT G10 -IR	277.1	0.209493	0.609413	911	1
001 30ms181005 BRCA2-Halo PCNA-iRFP IR tracking	WT G10 -IR	277.5	0.12536	0.390104	947	1
001 30ms181005 BRCA2-Halo PCNA-iRFP IR tracking	WT G10 -IR	277.6	0.0333411	0.582926	984	2
001 30ms181005 BRCA2-Halo PCNA-iRFP IR tracking	WT G10 -IR	278.1	1.41333	0.747272	947	0
001 30ms181005 BRCA2-Halo PCNA-iRFP IR tracking	WT G10 -IR	280.4	2.14423	0.303441	955	0
001 30ms181005 BRCA2-Halo PCNA-iRFP IR tracking	WT G10 -IR	283.2	0.646393	0.574741	990	0
001 30ms181005 BRCA2-Halo PCNA-iRFP IR tracking	WT G10 -IR	286.3	1.80578	0.453288	1000	0
001 30ms181005 BRCA2-Halo PCNA-iRFP IR tracking	WT G10 -IR	289.11	0.000924555	-0.0973219	1042	0
001 30ms181005 BRCA2-Halo PCNA-iRFP IR tracking	WT G10 -IR	290.2	1.74847	0.228268	1014	2
001 30ms181005 BRCA2-Halo PCNA-iRFP IR tracking	WT G10 -IR	291.2	0.0211507	0.253439	1014	2
001 30ms181005 BRCA2-Halo PCNA-iRFP IR tracking	WT G10 -IR	292.1	1.78342	0.52415	1017	0
001 30ms181005 BRCA2-Halo PCNA-iRFP IR tracking	WT G10 -IR	295.3	1.34119	0.100557	1031	0
001 30ms181005 BRCA2-Halo PCNA-iRFP IR tracking	WT G10 -IR	296.1	3.31931	0.483434	1027	0
001 30ms181005 BRCA2-Halo PCNA-iRFP IR tracking	WT G10 -IR	296.2	0.00300374	0.227907	1051	2
001 30ms181005 BRCA2-Halo PCNA-iRFP IR tracking	WT G10 -IR	298.1	0.270089	0.0595293	1043	0
001 30ms181005 BRCA2-Halo PCNA-iRFP IR tracking	WT G10 -IR	299.1	0.801182	0.078161	1047	0
001 30ms181005 BRCA2-Halo PCNA-iRFP IR tracking	WT G10 -IR	300.2	0.0311983	0.335209	1083	1
001 30ms181005 BRCA2-Halo PCNA-iRFP IR tracking	WT G10 -IR	300.3	1.44203	0.456431	1099	0
001 30ms181005 BRCA2-Halo PCNA-iRFP IR tracking	WT G10 -IR	304.1	2.40811	0.664135	1130	0
001 30ms181005 BRCA2-Halo PCNA-iRFP IR tracking	WT G10 -IR	305.1	3.33153	0.505878	1143	0
001 30ms181005 BRCA2-Halo PCNA-iRFP IR tracking	WT G10 -IR	306.1	1.35471	0.431741	1162	0
001 30ms181005 BRCA2-Halo PCNA-iRFP IR tracking	WT G10 -IR	312.1	0.00194556	0.0706165	1218	2
001 30ms181005 BRCA2-Halo PCNA-iRFP IR tracking	WT G10 -IR	313.1	1.27738	0.498312	1217	0
001 30ms181005 BRCA2-Halo PCNA-iRFP IR tracking	WT G10 -IR	314.1	0.315882	-0.0197359	1220	0
001 30ms181005 BRCA2-Halo PCNA-iRFP IR tracking	WT G10 -IR	319.1	0.00798945	0.229637	1310	2
001 30ms181005 BRCA2-Halo PCNA-iRFP IR tracking	WT G10 -IR	323.9	0.00374058	0.0356295	1339	2
001 30ms181005 BRCA2-Halo PCNA-iRFP IR tracking	WT G10 -IR	329.4	0.180374	0.457043	1438	1
001 30ms181005 BRCA2-Halo PCNA-iRFP IR tracking	WT G10 -IR	330.1	0.565331	0.0931963	1450	0
001 30ms181005 BRCA2-Halo PCNA-iRFP IR tracking	WT G10 -IR	332.4	0.0967283	0.00579144	1457	1
001 30ms181005 BRCA2-Halo PCNA-iRFP IR tracking	WT G10 -IR	334.3	1.0184	0.392304	1484	0
001 30ms181005 BRCA2-Halo PCNA-iRFP IR tracking	WT G10 -IR	336.2	0.017391	0.157355	1509	1
001 30ms181005 BRCA2-Halo PCNA-iRFP IR tracking	WT G10 -IR	338.1	1.89223	0.412692	1517	0
001 30ms181005 BRCA2-Halo PCNA-iRFP IR tracking	WT G10 -IR	340.4	0.00248466	0.0860496	1523	2
001 30ms181005 BRCA2-Halo PCNA-iRFP IR tracking	WT G10 -IR	341.3	0.00581323	0.285163	1546	2
001 30ms181005 BRCA2-Halo PCNA-iRFP IR tracking	WT G10 -IR	342.1	2.63689	0.444799	1548	0
001 30ms181005 BRCA2-Halo PCNA-iRFP IR tracking	WT G10 -IR	343.1	0.729536	0.349365	1561	0
001 30ms181005 BRCA2-Halo PCNA-iRFP IR tracking	WT G10 -IR	344.2	0.00418157	0.237036	1546	2
001 30ms181005 BRCA2-Halo PCNA-iRFP IR tracking	WT G10 -IR	344.6	0.00787681	0.274554	1563	2
001 30ms181005 BRCA2-Halo PCNA-iRFP IR tracking	WT G10 -IR	345.1	1.47098	0.626103	1566	0
001 30ms181005 BRCA2-Halo PCNA-iRFP IR tracking	WT G10 -IR	350.3	0.841616	0.437649	1588	0
001 30ms181005 BRCA2-Halo PCNA-iRFP IR tracking	WT G10 -IR	351.2	0.00799216	0.307027	1516	2
001 30ms181005 BRCA2-Halo PCNA-iRFP IR tracking	WT G10 -IR	351.4	0.00827968	0.335536	1562	2
001 30ms181005 BRCA2-Halo PCNA-iRFP IR tracking	WT G10 -IR	351.6	0.00980219	0.44859	1611	2
001 30ms181005 BRCA2-Halo PCNA-iRFP IR tracking	WT G10 -IR	352.1	2.24138	0.363707	1644	0
001 30ms181005 BRCA2-Halo PCNA-iRFP IR tracking	WT G10 -IR	353.1	1.93726	0.758834	1673	0
001 30ms181005 BRCA2-Halo PCNA-iRFP IR tracking	WT G10 -IR	354.2	0.00288254	0.36759	1699	2
001 30ms181005 BRCA2-Halo PCNA-iRFP IR tracking	WT G10 -IR	355.2	0.010772	0.260605	1702	2
001 30ms181005 BRCA2-Halo PCNA-iRFP IR tracking	WT G10 -IR	356.3	0.00275557	0.106706	1708	1
001 30ms181005 BRCA2-Halo PCNA-iRFP IR tracking	WT G10 -IR	362.2	0.018839	0.562149	1698	2
001 30ms181005 BRCA2-Halo PCNA-iRFP IR tracking	WT G10 -IR	362.4	0.00504318	0.219291	1716	2
001 30ms181005 BRCA2-Halo PCNA-iRFP IR tracking	WT G10 -IR	363.1	0.0304542	0.097031	1762	0
001 30ms181005 BRCA2-Halo PCNA-iRFP IR tracking	WT G10 -IR	365.2	0.00516612	0.227345	1730	2
001 30ms181005 BRCA2-Halo PCNA-iRFP IR tracking	WT G10 -IR	367.1	1.4545	0.46749	1804	0
001 30ms181005 BRCA2-Halo PCNA-iRFP IR tracking	WT G10 -IR	368.4	0.0121241	0.404369	1812	2
001 30ms181005 BRCA2-Halo PCNA-iRFP IR tracking	WT G10 -IR	371.1	0.00135814	0.107635	1885	2
001 30ms181005 BRCA2-Halo PCNA-iRFP IR tracking	WT G10 -IR	372.4	0.254315	0.433455	1890	1
001 30ms181005 BRCA2-Halo PCNA-iRFP IR tracking	WT G10 -IR	372.5	0.713942	0.607913	1903	0
001 30ms181005 BRCA2-Halo PCNA-iRFP IR tracking	WT G10 -IR	379.1	1.2664	0.590578	1969	0
001 30ms181012 BRCA2-Halo PCNA-iRFP IR tracking	WT G10 -IR	3.1	2.07284	0.385565	1	0
001 30ms181012 BRCA2-Halo PCNA-iRFP IR tracking	WT G10 -IR	5.1	3.33298	0.514214	3	0
001 30ms181012 BRCA2-Halo PCNA-iRFP IR tracking	WT G10 -IR	10.1	0.0688524	0.620829	4	1
001 30ms181012 BRCA2-Halo PCNA-iRFP IR tracking	WT G10 -IR	25.1	0.0760924	0.35889	52	1
001 30ms181012 BRCA2-Halo PCNA-iRFP IR tracking	WT G10 -IR	26.2	0.0379633	0.42779	35	1
001 30ms181012 BRCA2-Halo PCNA-iRFP IR tracking	WT G10 -IR	39.1	5.2274	0.524988	118	0
001 30ms181012 BRCA2-Halo PCNA-iRFP IR tracking	WT G10 -IR	41.1	2.19584	0.381262	109	0
001 30ms181012 BRCA2-Halo PCNA-iRFP IR tracking	WT G10 -IR	49.1	0.579865	0.631418	139	0
001 30ms181012 BRCA2-Halo PCNA-iRFP IR tracking	WT G10 -IR	50.1	0.915095	0.411756	150	0
001 30ms181012 BRCA2-Halo PCNA-iRFP IR tracking	WT G10 -IR	53.1	1.26183	0.292093	149	0
001 30ms181012 BRCA2-Halo PCNA-iRFP IR tracking	WT G10 -IR	58.1	1.5737	0.222838	184	0
001 30ms181012 BRCA2-Halo PCNA-iRFP IR tracking	WT G10 -IR	59.1	1.31118	0.593575	180	0
001 30ms181012 BRCA2-Halo PCNA-iRFP IR tracking	WT G10 -IR	64.1	6.43407	0.824913	203	0
001 30ms181012 BRCA2-Halo PCNA-iRFP IR tracking	WT G10 -IR	76.1	1.90466	0.522496	264	0
001 30ms181012 BRCA2-Halo PCNA-iRFP IR tracking	WT G10 -IR	78.1	0.302396	0.0140688	278	0
001 30ms181012 BRCA2-Halo PCNA-iRFP IR tracking	WT G10 -IR	85.1	0.00156286	0.221238	288	2
001 30ms181012 BRCA2-Halo PCNA-iRFP IR tracking	WT G10 -IR	85.3	0.00377466	0.275239	307	2
001 30ms181012 BRCA2-Halo PCNA-iRFP IR tracking	WT G10 -IR	92.1	1.06327	0.375058	320	0
001 30ms181012 BRCA2-Halo PCNA-iRFP IR tracking	WT G10 -IR	92.3	7.77458	0.570628	350	0
001 30ms181012 BRCA2-Halo PCNA-iRFP IR tracking	WT G10 -IR	96.1	0.4205	0.251082	380	0
001 30ms181012 BRCA2-Halo PCNA-iRFP IR tracking	WT G10 -IR	98.1	1.12412	0.255114	382	0
001 30ms181012 BRCA2-Halo PCNA-iRFP IR tracking	WT G10 -IR	113.1	0.947643	0.256484	442	0
001 30ms181012 BRCA2-Halo PCNA-iRFP IR tracking	WT G10 -IR	115.1	3.89217	0.449227	473	0
001 30ms181012 BRCA2-Halo PCNA-iRFP IR tracking	WT G10 -IR	130.5	0.0219005	0.0940771	576	1
001 30ms181012 BRCA2-Halo PCNA-iRFP IR tracking	WT G10 -IR	136.1	0.498676	-0.036745	598	0
001 30ms181012 BRCA2-Halo PCNA-iRFP IR tracking	WT G10 -IR	138.1	1.02667	0.394422	611	0
001 30ms181012 BRCA2-Halo PCNA-iRFP IR tracking	WT G10 -IR	139.1	2.24789	0.598405	609	0
001 30ms181012 BRCA2-Halo PCNA-iRFP IR tracking	WT G10 -IR	140.1	0.729904	0.182897	640	0
001 30ms181012 BRCA2-Halo PCNA-iRFP IR tracking	WT G10 -IR	141.1	0.0092528	0.502471	660	2
001 30ms181012 BRCA2-Halo PCNA-iRFP IR tracking	WT G10 -IR	143.1	1.11011	0.318265	682	0
001 30ms181012 BRCA2-Halo PCNA-iRFP IR tracking	WT G10 -IR	151.1	0.000809395	-0.0149234	795	2
001 30ms181012 BRCA2-Halo PCNA-iRFP IR tracking	WT G10 -IR	151.7	0.019245	0.371389	779	1
001 30ms181012 BRCA2-Halo PCNA-iRFP IR tracking	WT G10 -IR	155.1	1.6292	0.461163	755	0
001 30ms181012 BRCA2-Halo PCNA-iRFP IR tracking	WT G10 -IR	158.1	0.0198144	0.462294	751	2
001 30ms181012 BRCA2-Halo PCNA-iRFP IR tracking	WT G10 -IR	162.1	1.77343	0.29294	777	0
001 30ms181012 BRCA2-Halo PCNA-iRFP IR tracking	WT G10 -IR	165.1	0.0400004	0.269071	817	1
001 30ms181012 BRCA2-Halo PCNA-iRFP IR tracking	WT G10 -IR	167.1	3.26533	0.380543	832	0
001 30ms181012 BRCA2-Halo PCNA-iRFP IR tracking	WT G10 -IR	171.1	4.43485	0.49673	854	0
001 30ms181012 BRCA2-Halo PCNA-iRFP IR tracking	WT G10 -IR	172.1	0.00293903	0.233946	823	2
001 30ms181012 BRCA2-Halo PCNA-iRFP IR tracking	WT G10 -IR	179.1	5.34311	0.515741	923	0
001 30ms181012 BRCA2-Halo PCNA-iRFP IR tracking	WT G10 -IR	185.1	3.34568	0.821196	1023	0
001 30ms181012 BRCA2-Halo PCNA-iRFP IR tracking	WT G10 -IR	204.1	1.43464	0.524926	1231	0
001 30ms181012 BRCA2-Halo PCNA-iRFP IR tracking	WT G10 -IR	209.1	0.832206	0.506557	1279	0
001 30ms181012 BRCA2-Halo PCNA-iRFP IR tracking	WT G10 -IR	210.2	0.0367553	0.324761	1281	1
001 30ms181012 BRCA2-Halo PCNA-iRFP IR tracking	WT G10 -IR	215.4	0.0668372	0.323839	1356	1
001 30ms181012 BRCA2-Halo PCNA-iRFP IR tracking	WT G10 -IR	218.1	0.494147	0.341219	1384	0
001 30ms181012 BRCA2-Halo PCNA-iRFP IR tracking	WT G10 -IR	227.4	0.197106	0.412714	1468	1
001 30ms181012 BRCA2-Halo PCNA-iRFP IR tracking	WT G10 -IR	228.1	0.0022434	0.14386	1447	2
001 30ms181012 BRCA2-Halo PCNA-iRFP IR tracking	WT G10 -IR	229.1	1.03307	0.33276	1451	0
001 30ms181012 BRCA2-Halo PCNA-iRFP IR tracking	WT G10 -IR	230.4	0.272307	0.414014	1448	1
001 30ms181012 BRCA2-Halo PCNA-iRFP IR tracking	WT G10 -IR	232.1	0.428819	0.242765	1513	0
001 30ms181012 BRCA2-Halo PCNA-iRFP IR tracking	WT G10 -IR	237.3	1.05181	0.658833	1584	0
001 30ms181012 BRCA2-Halo PCNA-iRFP IR tracking	WT G10 -IR	241.4	1.36166	0.206257	1650	0
001 30ms181012 BRCA2-Halo PCNA-iRFP IR tracking	WT G10 -IR	243.2	0.00627493	0.427394	1676	2
001 30ms181012 BRCA2-Halo PCNA-iRFP IR tracking	WT G10 -IR	244.1	0.459086	0.100476	1801	0
001 30ms181012 BRCA2-Halo PCNA-iRFP IR tracking	WT G10 -IR	251.1	0.00864066	0.203535	1886	1
001 30ms181012 BRCA2-Halo PCNA-iRFP IR tracking	WT G10 -IR	254.1	1.08685	0.528114	1924	0
001 30ms181012 BRCA2-Halo PCNA-iRFP IR tracking	WT G10 -IR	257.1	0.767315	0.583068	1943	0
002 30ms181005 BRCA2-Halo PCNA-iRFP IR tracking	WT G10 -IR	13.1	0.914863	0.270992	0	0
002 30ms181005 BRCA2-Halo PCNA-iRFP IR tracking	WT G10 -IR	16.1	0.00672019	0.540836	0	2
002 30ms181005 BRCA2-Halo PCNA-iRFP IR tracking	WT G10 -IR	18.1	0.00437478	0.0916827	0	2
002 30ms181005 BRCA2-Halo PCNA-iRFP IR tracking	WT G10 -IR	19.4	0.001853	0.15274	14	1
002 30ms181005 BRCA2-Halo PCNA-iRFP IR tracking	WT G10 -IR	19.5	0.00291494	0.185709	30	2
002 30ms181005 BRCA2-Halo PCNA-iRFP IR tracking	WT G10 -IR	19.7	0.00111245	0.140046	51	2
002 30ms181005 BRCA2-Halo PCNA-iRFP IR tracking	WT G10 -IR	22.1	0.0114761	0.42905	0	2
002 30ms181005 BRCA2-Halo PCNA-iRFP IR tracking	WT G10 -IR	27.2	0.0580561	0.19891	4	1
002 30ms181005 BRCA2-Halo PCNA-iRFP IR tracking	WT G10 -IR	28.2	0.988362	0.0678996	26	0
002 30ms181005 BRCA2-Halo PCNA-iRFP IR tracking	WT G10 -IR	30.1	1.73821	0.470852	27	0
002 30ms181005 BRCA2-Halo PCNA-iRFP IR tracking	WT G10 -IR	32.1	0.00355198	0.165617	0	2
002 30ms181005 BRCA2-Halo PCNA-iRFP IR tracking	WT G10 -IR	33.1	0.0632162	0.418518	21	1
002 30ms181005 BRCA2-Halo PCNA-iRFP IR tracking	WT G10 -IR	36.1	1.372	0.147196	22	0
002 30ms181005 BRCA2-Halo PCNA-iRFP IR tracking	WT G10 -IR	37.1	0.00251593	0.152531	0	2
002 30ms181005 BRCA2-Halo PCNA-iRFP IR tracking	WT G10 -IR	41.6	0.00268191	0.169818	19	2
002 30ms181005 BRCA2-Halo PCNA-iRFP IR tracking	WT G10 -IR	43.1	1.03537	0.21654	33	0
002 30ms181005 BRCA2-Halo PCNA-iRFP IR tracking	WT G10 -IR	45.1	0.0147629	0.377314	0	2
002 30ms181005 BRCA2-Halo PCNA-iRFP IR tracking	WT G10 -IR	46.2	0.00347275	0.227539	6	2
002 30ms181005 BRCA2-Halo PCNA-iRFP IR tracking	WT G10 -IR	48.2	0.0256978	0.117358	47	1
002 30ms181005 BRCA2-Halo PCNA-iRFP IR tracking	WT G10 -IR	53.4	1.01506	0.411546	53	0
002 30ms181005 BRCA2-Halo PCNA-iRFP IR tracking	WT G10 -IR	57.1	0.950609	0.286745	53	0
002 30ms181005 BRCA2-Halo PCNA-iRFP IR tracking	WT G10 -IR	59.2	0.00115855	0.121982	25	2
002 30ms181005 BRCA2-Halo PCNA-iRFP IR tracking	WT G10 -IR	59.5	2.93417	0.443857	49	0
002 30ms181005 BRCA2-Halo PCNA-iRFP IR tracking	WT G10 -IR	62.1	1.81539	0.352697	65	0
002 30ms181005 BRCA2-Halo PCNA-iRFP IR tracking	WT G10 -IR	63.3	0.165353	0.303623	60	0
002 30ms181005 BRCA2-Halo PCNA-iRFP IR tracking	WT G10 -IR	65.1	0.879013	0.143455	52	0
002 30ms181005 BRCA2-Halo PCNA-iRFP IR tracking	WT G10 -IR	67.3	0.00475496	0.164298	76	2
002 30ms181005 BRCA2-Halo PCNA-iRFP IR tracking	WT G10 -IR	68.3	0.00876563	0.463208	55	2
002 30ms181005 BRCA2-Halo PCNA-iRFP IR tracking	WT G10 -IR	75.1	2.80681	0.548293	69	0
002 30ms181005 BRCA2-Halo PCNA-iRFP IR tracking	WT G10 -IR	75.2	0.0970495	0.576434	83	1
002 30ms181005 BRCA2-Halo PCNA-iRFP IR tracking	WT G10 -IR	80.1	0.00352459	0.226492	0	2
002 30ms181005 BRCA2-Halo PCNA-iRFP IR tracking	WT G10 -IR	81.3	0.00673711	0.278123	12	2
002 30ms181005 BRCA2-Halo PCNA-iRFP IR tracking	WT G10 -IR	82.1	0.992059	0.439142	108	0
002 30ms181005 BRCA2-Halo PCNA-iRFP IR tracking	WT G10 -IR	86.2	0.0100583	0.0706555	131	1
002 30ms181005 BRCA2-Halo PCNA-iRFP IR tracking	WT G10 -IR	87.1	0.407854	0.306179	110	0
002 30ms181005 BRCA2-Halo PCNA-iRFP IR tracking	WT G10 -IR	87.5	0.132142	0.086711	158	0
002 30ms181005 BRCA2-Halo PCNA-iRFP IR tracking	WT G10 -IR	87.7	0.16473	0.193003	172	0
002 30ms181005 BRCA2-Halo PCNA-iRFP IR tracking	WT G10 -IR	89.1	2.75484	0.570482	98	0
002 30ms181005 BRCA2-Halo PCNA-iRFP IR tracking	WT G10 -IR	90.1	0.259683	0.22413	113	0
002 30ms181005 BRCA2-Halo PCNA-iRFP IR tracking	WT G10 -IR	97.2	0.0593115	0.30472	115	1
002 30ms181005 BRCA2-Halo PCNA-iRFP IR tracking	WT G10 -IR	99.1	0.0118014	0.454542	118	2
002 30ms181005 BRCA2-Halo PCNA-iRFP IR tracking	WT G10 -IR	99.2	0.0253374	0.259745	138	1
002 30ms181005 BRCA2-Halo PCNA-iRFP IR tracking	WT G10 -IR	102.3	0.000118047	0.007485	120	2
002 30ms181005 BRCA2-Halo PCNA-iRFP IR tracking	WT G10 -IR	103.5	1.10683	0.460543	152	0
002 30ms181005 BRCA2-Halo PCNA-iRFP IR tracking	WT G10 -IR	105.7	0.0220416	0.318627	165	1
002 30ms181005 BRCA2-Halo PCNA-iRFP IR tracking	WT G10 -IR	110.6	0.206894	0.422271	183	1
002 30ms181005 BRCA2-Halo PCNA-iRFP IR tracking	WT G10 -IR	115.2	0.00253226	0.0417221	167	2
002 30ms181005 BRCA2-Halo PCNA-iRFP IR tracking	WT G10 -IR	119.1	0.00718269	0.184818	119	2
002 30ms181005 BRCA2-Halo PCNA-iRFP IR tracking	WT G10 -IR	121.1	0.00127958	0.0155355	155	2
002 30ms181005 BRCA2-Halo PCNA-iRFP IR tracking	WT G10 -IR	124.1	1.09343	0.632373	184	0
002 30ms181005 BRCA2-Halo PCNA-iRFP IR tracking	WT G10 -IR	128.1	0.00415548	0.242901	0	2
002 30ms181005 BRCA2-Halo PCNA-iRFP IR tracking	WT G10 -IR	130.1	0.858804	0.325102	213	0
002 30ms181005 BRCA2-Halo PCNA-iRFP IR tracking	WT G10 -IR	136.1	0.7529	0.088533	226	0
002 30ms181005 BRCA2-Halo PCNA-iRFP IR tracking	WT G10 -IR	138.1	1.73627	0.328042	245	0
002 30ms181005 BRCA2-Halo PCNA-iRFP IR tracking	WT G10 -IR	141.2	0.00301742	0.162978	202	2
002 30ms181005 BRCA2-Halo PCNA-iRFP IR tracking	WT G10 -IR	142.3	1.74891	0.111404	260	0
002 30ms181005 BRCA2-Halo PCNA-iRFP IR tracking	WT G10 -IR	146.1	1.21441	0.206882	265	0
002 30ms181005 BRCA2-Halo PCNA-iRFP IR tracking	WT G10 -IR	149.3	1.81588	0.273296	272	0
002 30ms181005 BRCA2-Halo PCNA-iRFP IR tracking	WT G10 -IR	150.1	2.52412	0.41392	100	0
002 30ms181005 BRCA2-Halo PCNA-iRFP IR tracking	WT G10 -IR	150.1	0.00950617	0.434051	227	2
002 30ms181005 BRCA2-Halo PCNA-iRFP IR tracking	WT G10 -IR	150.12	0.0010607	-0.272244	243	2
002 30ms181005 BRCA2-Halo PCNA-iRFP IR tracking	WT G10 -IR	150.15	0.0097566	0.39414	266	2
002 30ms181005 BRCA2-Halo PCNA-iRFP IR tracking	WT G10 -IR	150.2	0.00497353	0.196317	115	2
002 30ms181005 BRCA2-Halo PCNA-iRFP IR tracking	WT G10 -IR	150.4	0.00971819	0.269382	170	2
002 30ms181005 BRCA2-Halo PCNA-iRFP IR tracking	WT G10 -IR	150.8	0.00387938	0.128266	210	2
002 30ms181005 BRCA2-Halo PCNA-iRFP IR tracking	WT G10 -IR	153.1	1.76281	0.345253	273	0
002 30ms181005 BRCA2-Halo PCNA-iRFP IR tracking	WT G10 -IR	154.1	0.158247	0.271022	279	0
002 30ms181005 BRCA2-Halo PCNA-iRFP IR tracking	WT G10 -IR	155.1	2.30526	0.41475	285	0
002 30ms181005 BRCA2-Halo PCNA-iRFP IR tracking	WT G10 -IR	158.1	0.466176	-0.00470823	280	0
002 30ms181005 BRCA2-Halo PCNA-iRFP IR tracking	WT G10 -IR	161.1	0.0034302	0.354956	245	2
002 30ms181005 BRCA2-Halo PCNA-iRFP IR tracking	WT G10 -IR	163.3	0.0080577	0.345157	265	2
002 30ms181005 BRCA2-Halo PCNA-iRFP IR tracking	WT G10 -IR	167.4	0.00455539	0.26513	268	2
002 30ms181005 BRCA2-Halo PCNA-iRFP IR tracking	WT G10 -IR	169.1	0.833942	0.115826	329	0
002 30ms181005 BRCA2-Halo PCNA-iRFP IR tracking	WT G10 -IR	170.4	0.709273	0.244045	322	0
002 30ms181005 BRCA2-Halo PCNA-iRFP IR tracking	WT G10 -IR	171.12	0.22508	0.448822	376	1
002 30ms181005 BRCA2-Halo PCNA-iRFP IR tracking	WT G10 -IR	172.1	0.048678	0.0415188	330	1
002 30ms181005 BRCA2-Halo PCNA-iRFP IR tracking	WT G10 -IR	174.1	0.162655	0.0863931	348	0
002 30ms181005 BRCA2-Halo PCNA-iRFP IR tracking	WT G10 -IR	183.2	0.00518847	0.213159	357	2
002 30ms181005 BRCA2-Halo PCNA-iRFP IR tracking	WT G10 -IR	185.2	0.009614	0.259225	375	2
002 30ms181005 BRCA2-Halo PCNA-iRFP IR tracking	WT G10 -IR	187.3	1.79103	0.460842	385	0
002 30ms181005 BRCA2-Halo PCNA-iRFP IR tracking	WT G10 -IR	188.1	2.00133	0.235682	385	0
002 30ms181005 BRCA2-Halo PCNA-iRFP IR tracking	WT G10 -IR	194.1	0.94618	0.276782	418	0
002 30ms181005 BRCA2-Halo PCNA-iRFP IR tracking	WT G10 -IR	195.2	0.0907866	0.391443	414	1
002 30ms181005 BRCA2-Halo PCNA-iRFP IR tracking	WT G10 -IR	196.1	1.74792	0.352698	441	0
002 30ms181005 BRCA2-Halo PCNA-iRFP IR tracking	WT G10 -IR	199.2	2.27363	0.433042	459	0
002 30ms181005 BRCA2-Halo PCNA-iRFP IR tracking	WT G10 -IR	202.1	0.664515	0.466658	469	0
002 30ms181005 BRCA2-Halo PCNA-iRFP IR tracking	WT G10 -IR	204.3	1.24231	0.534132	473	0
002 30ms181005 BRCA2-Halo PCNA-iRFP IR tracking	WT G10 -IR	206.1	1.16169	0.518543	474	0
002 30ms181005 BRCA2-Halo PCNA-iRFP IR tracking	WT G10 -IR	207.7	0.155561	0.490021	464	1
002 30ms181005 BRCA2-Halo PCNA-iRFP IR tracking	WT G10 -IR	209.1	0.00536621	0.389015	421	2
002 30ms181005 BRCA2-Halo PCNA-iRFP IR tracking	WT G10 -IR	210.2	0.0038235	0.270184	477	2
002 30ms181005 BRCA2-Halo PCNA-iRFP IR tracking	WT G10 -IR	211.1	0.952692	0.550266	488	0
002 30ms181005 BRCA2-Halo PCNA-iRFP IR tracking	WT G10 -IR	213.1	2.46737	0.422779	501	0
002 30ms181005 BRCA2-Halo PCNA-iRFP IR tracking	WT G10 -IR	217.1	1.07118	0.633748	517	0
002 30ms181005 BRCA2-Halo PCNA-iRFP IR tracking	WT G10 -IR	221.1	0.913144	0.235579	547	0
002 30ms181005 BRCA2-Halo PCNA-iRFP IR tracking	WT G10 -IR	223.1	2.82823	0.541529	541	0
002 30ms181005 BRCA2-Halo PCNA-iRFP IR tracking	WT G10 -IR	224.1	3.02228	0.497329	552	0
002 30ms181005 BRCA2-Halo PCNA-iRFP IR tracking	WT G10 -IR	226.1	0.00638203	0.37931	572	2
002 30ms181005 BRCA2-Halo PCNA-iRFP IR tracking	WT G10 -IR	226.3	0.0115836	0.33326	607	2
002 30ms181005 BRCA2-Halo PCNA-iRFP IR tracking	WT G10 -IR	227.1	0.554406	0.094163	599	0
002 30ms181005 BRCA2-Halo PCNA-iRFP IR tracking	WT G10 -IR	228.1	0.00281011	0.0192811	585	2
002 30ms181005 BRCA2-Halo PCNA-iRFP IR tracking	WT G10 -IR	229.3	0.381093	0.171527	597	0
002 30ms181005 BRCA2-Halo PCNA-iRFP IR tracking	WT G10 -IR	230.1	0.667376	0.279183	634	0
002 30ms181005 BRCA2-Halo PCNA-iRFP IR tracking	WT G10 -IR	237.1	2.26228	0.412482	677	0
002 30ms181005 BRCA2-Halo PCNA-iRFP IR tracking	WT G10 -IR	238.1	1.09875	0.226732	695	0
002 30ms181005 BRCA2-Halo PCNA-iRFP IR tracking	WT G10 -IR	242.1	0.00247046	0.0368745	675	2
002 30ms181005 BRCA2-Halo PCNA-iRFP IR tracking	WT G10 -IR	245.1	2.38331	0.359441	732	0
002 30ms181005 BRCA2-Halo PCNA-iRFP IR tracking	WT G10 -IR	248.1	2.45754	0.429656	739	0
002 30ms181005 BRCA2-Halo PCNA-iRFP IR tracking	WT G10 -IR	249.1	0.00282248	0.253781	713	2
002 30ms181005 BRCA2-Halo PCNA-iRFP IR tracking	WT G10 -IR	258.2	0.00129208	-0.00203771	784	1
002 30ms181005 BRCA2-Halo PCNA-iRFP IR tracking	WT G10 -IR	259.1	1.04048	0.347753	780	0
002 30ms181005 BRCA2-Halo PCNA-iRFP IR tracking	WT G10 -IR	261.1	0.422393	0.398542	801	0
002 30ms181005 BRCA2-Halo PCNA-iRFP IR tracking	WT G10 -IR	264.11	0.00994883	0.194369	890	2
002 30ms181005 BRCA2-Halo PCNA-iRFP IR tracking	WT G10 -IR	264.5	0.00721155	0.220591	847	2
002 30ms181005 BRCA2-Halo PCNA-iRFP IR tracking	WT G10 -IR	264.7	0.0183883	0.347785	872	2
002 30ms181005 BRCA2-Halo PCNA-iRFP IR tracking	WT G10 -IR	265.2	0.008392	0.264742	817	2
002 30ms181005 BRCA2-Halo PCNA-iRFP IR tracking	WT G10 -IR	266.1	1.25196	0.478262	846	0
002 30ms181005 BRCA2-Halo PCNA-iRFP IR tracking	WT G10 -IR	267.1	0.00109242	0.0924354	832	2
002 30ms181005 BRCA2-Halo PCNA-iRFP IR tracking	WT G10 -IR	269.1	0.00395176	0.180416	754	2
002 30ms181005 BRCA2-Halo PCNA-iRFP IR tracking	WT G10 -IR	269.3	0.00549298	0.246373	792	2
002 30ms181005 BRCA2-Halo PCNA-iRFP IR tracking	WT G10 -IR	269.7	0.000687729	0.0344833	906	2
002 30ms181005 BRCA2-Halo PCNA-iRFP IR tracking	WT G10 -IR	270.1	0.00383091	0.261611	910	2
002 30ms181005 BRCA2-Halo PCNA-iRFP IR tracking	WT G10 -IR	271.1	0.00119799	0.131629	826	2
002 30ms181005 BRCA2-Halo PCNA-iRFP IR tracking	WT G10 -IR	273.4	0.0326578	0.179878	947	1
002 30ms181005 BRCA2-Halo PCNA-iRFP IR tracking	WT G10 -IR	275.2	0.0040562	0.251226	947	2
002 30ms181005 BRCA2-Halo PCNA-iRFP IR tracking	WT G10 -IR	276.1	0.552372	-0.19881	978	0
002 30ms181005 BRCA2-Halo PCNA-iRFP IR tracking	WT G10 -IR	282.2	0.0619391	0.257621	1014	1
002 30ms181005 BRCA2-Halo PCNA-iRFP IR tracking	WT G10 -IR	288.2	0.0430332	0.317152	1106	1
002 30ms181005 BRCA2-Halo PCNA-iRFP IR tracking	WT G10 -IR	290.1	0.0045091	0.204945	1138	2
002 30ms181005 BRCA2-Halo PCNA-iRFP IR tracking	WT G10 -IR	294.1	0.483795	0.00175308	1170	0
002 30ms181005 BRCA2-Halo PCNA-iRFP IR tracking	WT G10 -IR	295.1	0.573515	0.184913	1189	0
002 30ms181005 BRCA2-Halo PCNA-iRFP IR tracking	WT G10 -IR	299.4	0.042293	0.46192	1218	1
002 30ms181005 BRCA2-Halo PCNA-iRFP IR tracking	WT G10 -IR	301.2	0.0649294	0.401207	1219	1
002 30ms181005 BRCA2-Halo PCNA-iRFP IR tracking	WT G10 -IR	304.7	0.0322562	0.422173	1257	1
002 30ms181005 BRCA2-Halo PCNA-iRFP IR tracking	WT G10 -IR	306.5	2.55213	0.350996	1271	0
002 30ms181005 BRCA2-Halo PCNA-iRFP IR tracking	WT G10 -IR	307.2	0.0191472	0.56764	1267	2
002 30ms181005 BRCA2-Halo PCNA-iRFP IR tracking	WT G10 -IR	309.1	1.18855	0.261793	1303	0
002 30ms181005 BRCA2-Halo PCNA-iRFP IR tracking	WT G10 -IR	313.1	0.00202608	0.347468	1311	2
002 30ms181005 BRCA2-Halo PCNA-iRFP IR tracking	WT G10 -IR	319.1	0.00326348	0.0425179	1356	2
002 30ms181005 BRCA2-Halo PCNA-iRFP IR tracking	WT G10 -IR	320.4	0.0212686	0.321599	1364	1
002 30ms181005 BRCA2-Halo PCNA-iRFP IR tracking	WT G10 -IR	320.9	0.00790815	0.44015	1390	2
002 30ms181005 BRCA2-Halo PCNA-iRFP IR tracking	WT G10 -IR	321.2	0.00672605	0.372187	1329	2
002 30ms181005 BRCA2-Halo PCNA-iRFP IR tracking	WT G10 -IR	322.2	0.000596723	0.033747	1397	2
002 30ms181005 BRCA2-Halo PCNA-iRFP IR tracking	WT G10 -IR	323.4	0.005827	0.0593446	1411	1
002 30ms181005 BRCA2-Halo PCNA-iRFP IR tracking	WT G10 -IR	323.5	0.000983436	0.115828	1423	2
002 30ms181005 BRCA2-Halo PCNA-iRFP IR tracking	WT G10 -IR	324.2	0.00607154	0.262589	1407	2
002 30ms181005 BRCA2-Halo PCNA-iRFP IR tracking	WT G10 -IR	328.1	0.0071928	0.0590883	1470	1
002 30ms181005 BRCA2-Halo PCNA-iRFP IR tracking	WT G10 -IR	329.2	0.121875	-0.0189715	1478	0
002 30ms181005 BRCA2-Halo PCNA-iRFP IR tracking	WT G10 -IR	337.2	0.0163536	0.20529	1539	2
002 30ms181005 BRCA2-Halo PCNA-iRFP IR tracking	WT G10 -IR	337.3	0.0825175	0.235966	1551	1
002 30ms181005 BRCA2-Halo PCNA-iRFP IR tracking	WT G10 -IR	338.1	0.00290077	0.302186	1374	2
002 30ms181005 BRCA2-Halo PCNA-iRFP IR tracking	WT G10 -IR	338.4	0.0794433	0.2263	1519	1
002 30ms181005 BRCA2-Halo PCNA-iRFP IR tracking	WT G10 -IR	338.5	0.00971278	0.456629	1536	2
002 30ms181005 BRCA2-Halo PCNA-iRFP IR tracking	WT G10 -IR	342.4	0.00212176	0.313725	1614	2
002 30ms181005 BRCA2-Halo PCNA-iRFP IR tracking	WT G10 -IR	343.1	0.0357564	0.385099	1598	1
002 30ms181005 BRCA2-Halo PCNA-iRFP IR tracking	WT G10 -IR	348.2	0.0233185	-0.0625869	1639	1
002 30ms181005 BRCA2-Halo PCNA-iRFP IR tracking	WT G10 -IR	352.1	2.74424	0.344134	1641	0
002 30ms181005 BRCA2-Halo PCNA-iRFP IR tracking	WT G10 -IR	353.6	0.170104	0.548139	1660	1
002 30ms181005 BRCA2-Halo PCNA-iRFP IR tracking	WT G10 -IR	358.2	0.00494967	0.00313863	1744	2
002 30ms181005 BRCA2-Halo PCNA-iRFP IR tracking	WT G10 -IR	366.1	0.528407	0.284141	1832	0
002 30ms181012 BRCA2-Halo PCNA-iRFP IR tracking	WT G10 -IR	0.1	0.140992	0.489049	0	1
002 30ms181012 BRCA2-Halo PCNA-iRFP IR tracking	WT G10 -IR	11.1	0.0222371	0.274214	3	1
002 30ms181012 BRCA2-Halo PCNA-iRFP IR tracking	WT G10 -IR	22.1	0.00224405	0.25696	61	2
002 30ms181012 BRCA2-Halo PCNA-iRFP IR tracking	WT G10 -IR	25.3	0.0205794	0.271035	71	1
002 30ms181012 BRCA2-Halo PCNA-iRFP IR tracking	WT G10 -IR	26.3	0.0341732	0.296292	5	1
002 30ms181012 BRCA2-Halo PCNA-iRFP IR tracking	WT G10 -IR	26.4	0.0109406	0.295878	42	2
002 30ms181012 BRCA2-Halo PCNA-iRFP IR tracking	WT G10 -IR	26.7	0.0211842	0.212214	82	1
002 30ms181012 BRCA2-Halo PCNA-iRFP IR tracking	WT G10 -IR	27.1	2.53263	0.582203	94	0
002 30ms181012 BRCA2-Halo PCNA-iRFP IR tracking	WT G10 -IR	33.1	1.52246	0.277388	95	0
002 30ms181012 BRCA2-Halo PCNA-iRFP IR tracking	WT G10 -IR	38.1	1.77182	0.400884	114	0
002 30ms181012 BRCA2-Halo PCNA-iRFP IR tracking	WT G10 -IR	44.1	1.55738	0.345286	113	0
002 30ms181012 BRCA2-Halo PCNA-iRFP IR tracking	WT G10 -IR	58.3	1.46796	0.34798	145	0
002 30ms181012 BRCA2-Halo PCNA-iRFP IR tracking	WT G10 -IR	58.5	2.68661	0.361685	176	0
002 30ms181012 BRCA2-Halo PCNA-iRFP IR tracking	WT G10 -IR	60.1	0.810242	0.152814	127	0
002 30ms181012 BRCA2-Halo PCNA-iRFP IR tracking	WT G10 -IR	67.1	1.25628	0.235689	154	0
002 30ms181012 BRCA2-Halo PCNA-iRFP IR tracking	WT G10 -IR	69.1	0.745693	0.156463	161	0
002 30ms181012 BRCA2-Halo PCNA-iRFP IR tracking	WT G10 -IR	69.5	0.793768	0.0100206	197	0
002 30ms181012 BRCA2-Halo PCNA-iRFP IR tracking	WT G10 -IR	76.1	0.311868	0.0195278	167	0
002 30ms181012 BRCA2-Halo PCNA-iRFP IR tracking	WT G10 -IR	86.2	0.0017612	0.0713383	146	2
002 30ms181012 BRCA2-Halo PCNA-iRFP IR tracking	WT G10 -IR	94.2	0.00382682	-0.00993256	212	1
002 30ms181012 BRCA2-Halo PCNA-iRFP IR tracking	WT G10 -IR	97.2	0.00602746	0.134258	176	2
002 30ms181012 BRCA2-Halo PCNA-iRFP IR tracking	WT G10 -IR	105.1	0.486546	0.0607212	233	0
002 30ms181012 BRCA2-Halo PCNA-iRFP IR tracking	WT G10 -IR	109.1	0.0570765	0.400754	236	1
002 30ms181012 BRCA2-Halo PCNA-iRFP IR tracking	WT G10 -IR	111.2	0.00924355	0.407342	243	2
002 30ms181012 BRCA2-Halo PCNA-iRFP IR tracking	WT G10 -IR	113.1	2.46411	0.474839	249	0
002 30ms181012 BRCA2-Halo PCNA-iRFP IR tracking	WT G10 -IR	117.3	1.94253	0.245496	273	0
002 30ms181012 BRCA2-Halo PCNA-iRFP IR tracking	WT G10 -IR	118.2	0.186779	0.637886	256	1
002 30ms181012 BRCA2-Halo PCNA-iRFP IR tracking	WT G10 -IR	120.3	0.657556	0.0979469	241	0
002 30ms181012 BRCA2-Halo PCNA-iRFP IR tracking	WT G10 -IR	128.1	0.0193174	0.534116	260	2
002 30ms181012 BRCA2-Halo PCNA-iRFP IR tracking	WT G10 -IR	128.4	0.00885136	0.402104	289	2
002 30ms181012 BRCA2-Halo PCNA-iRFP IR tracking	WT G10 -IR	129.1	1.5162	0.304545	282	0
002 30ms181012 BRCA2-Halo PCNA-iRFP IR tracking	WT G10 -IR	135.2	0.00261075	0.228316	176	2
002 30ms181012 BRCA2-Halo PCNA-iRFP IR tracking	WT G10 -IR	135.4	0.00144791	0.00643695	206	2
002 30ms181012 BRCA2-Halo PCNA-iRFP IR tracking	WT G10 -IR	135.8	0.0015094	0.150909	262	2
002 30ms181012 BRCA2-Halo PCNA-iRFP IR tracking	WT G10 -IR	137.2	0.0871633	0.374763	259	1
002 30ms181012 BRCA2-Halo PCNA-iRFP IR tracking	WT G10 -IR	137.6	0.168723	0.331521	293	1
002 30ms181012 BRCA2-Halo PCNA-iRFP IR tracking	WT G10 -IR	139.1	2.26422	0.24282	297	0
002 30ms181012 BRCA2-Halo PCNA-iRFP IR tracking	WT G10 -IR	142.1	0.00012145	0.163441	305	2
002 30ms181012 BRCA2-Halo PCNA-iRFP IR tracking	WT G10 -IR	143.1	0.00120883	0.302472	305	2
002 30ms181012 BRCA2-Halo PCNA-iRFP IR tracking	WT G10 -IR	146.1	0.0208156	0.358155	248	2
002 30ms181012 BRCA2-Halo PCNA-iRFP IR tracking	WT G10 -IR	146.1	0.00695249	0.239139	311	2
002 30ms181012 BRCA2-Halo PCNA-iRFP IR tracking	WT G10 -IR	146.3	0.0093241	0.470829	265	2
002 30ms181012 BRCA2-Halo PCNA-iRFP IR tracking	WT G10 -IR	146.8	0.00207716	0.0536238	291	2
002 30ms181012 BRCA2-Halo PCNA-iRFP IR tracking	WT G10 -IR	154.11	0.125821	0.343575	375	1
002 30ms181012 BRCA2-Halo PCNA-iRFP IR tracking	WT G10 -IR	154.12	2.69578	0.629032	403	0
002 30ms181012 BRCA2-Halo PCNA-iRFP IR tracking	WT G10 -IR	154.6	0.565036	0.136674	352	0
002 30ms181012 BRCA2-Halo PCNA-iRFP IR tracking	WT G10 -IR	161.1	2.17088	0.251745	351	0
002 30ms181012 BRCA2-Halo PCNA-iRFP IR tracking	WT G10 -IR	163.6	0.003219	0.114202	303	2
002 30ms181012 BRCA2-Halo PCNA-iRFP IR tracking	WT G10 -IR	164.1	0.238768	0.469506	354	1
002 30ms181012 BRCA2-Halo PCNA-iRFP IR tracking	WT G10 -IR	165.1	0.0338429	0.599882	334	2
002 30ms181012 BRCA2-Halo PCNA-iRFP IR tracking	WT G10 -IR	165.2	0.0326023	0.06652	346	1
002 30ms181012 BRCA2-Halo PCNA-iRFP IR tracking	WT G10 -IR	171.15	0.00448465	0.125632	407	2
002 30ms181012 BRCA2-Halo PCNA-iRFP IR tracking	WT G10 -IR	172.1	0.615634	0.170302	379	2
002 30ms181012 BRCA2-Halo PCNA-iRFP IR tracking	WT G10 -IR	180.7	0.00747428	0.173976	400	2
002 30ms181012 BRCA2-Halo PCNA-iRFP IR tracking	WT G10 -IR	183.1	0.0020322	0.0923762	405	2
002 30ms181012 BRCA2-Halo PCNA-iRFP IR tracking	WT G10 -IR	187.1	1.26433	0.145664	429	0
002 30ms181012 BRCA2-Halo PCNA-iRFP IR tracking	WT G10 -IR	197.2	0.169099	0.755953	461	1
002 30ms181012 BRCA2-Halo PCNA-iRFP IR tracking	WT G10 -IR	200.5	1.10649	0.464486	471	0
002 30ms181012 BRCA2-Halo PCNA-iRFP IR tracking	WT G10 -IR	201.1	0.0104982	0.361883	426	2
002 30ms181012 BRCA2-Halo PCNA-iRFP IR tracking	WT G10 -IR	201.1	0.000405205	0.0377269	482	2
002 30ms181012 BRCA2-Halo PCNA-iRFP IR tracking	WT G10 -IR	202.1	3.19628	0.778813	477	0
002 30ms181012 BRCA2-Halo PCNA-iRFP IR tracking	WT G10 -IR	204.12	0.00208779	0.104213	454	2
002 30ms181012 BRCA2-Halo PCNA-iRFP IR tracking	WT G10 -IR	204.14	0.00231994	0.1315	480	2
002 30ms181012 BRCA2-Halo PCNA-iRFP IR tracking	WT G10 -IR	204.18	0.00423234	0.124252	515	2
002 30ms181012 BRCA2-Halo PCNA-iRFP IR tracking	WT G10 -IR	204.19	0.00180763	-0.1734	540	1
002 30ms181012 BRCA2-Halo PCNA-iRFP IR tracking	WT G10 -IR	204.7	0.0291342	0.121904	415	1
002 30ms181012 BRCA2-Halo PCNA-iRFP IR tracking	WT G10 -IR	204.9	0.00209357	0.0556366	435	2
002 30ms181012 BRCA2-Halo PCNA-iRFP IR tracking	WT G10 -IR	205.9	0.889558	0.0538186	530	1
002 30ms181012 BRCA2-Halo PCNA-iRFP IR tracking	WT G10 -IR	212.2	0.00510019	0.282301	525	2
002 30ms181012 BRCA2-Halo PCNA-iRFP IR tracking	WT G10 -IR	216.1	0.00173797	0.143423	524	2
002 30ms181012 BRCA2-Halo PCNA-iRFP IR tracking	WT G10 -IR	217.1	1.78658	0.196374	550	0
002 30ms181012 BRCA2-Halo PCNA-iRFP IR tracking	WT G10 -IR	221.1	0.341126	0.0685861	587	0
002 30ms181012 BRCA2-Halo PCNA-iRFP IR tracking	WT G10 -IR	228.2	0.0119888	0.24206	650	2
002 30ms181012 BRCA2-Halo PCNA-iRFP IR tracking	WT G10 -IR	234.1	0.931827	0.261193	669	0
002 30ms181012 BRCA2-Halo PCNA-iRFP IR tracking	WT G10 -IR	234.3	0.839504	0.557735	697	0
002 30ms181012 BRCA2-Halo PCNA-iRFP IR tracking	WT G10 -IR	234.4	0.150718	0.286734	728	1
002 30ms181012 BRCA2-Halo PCNA-iRFP IR tracking	WT G10 -IR	235.1	1.25051	0.165414	682	0
002 30ms181012 BRCA2-Halo PCNA-iRFP IR tracking	WT G10 -IR	238.1	0.00208031	0.0304327	656	2
002 30ms181012 BRCA2-Halo PCNA-iRFP IR tracking	WT G10 -IR	241.1	2.11463	0.350479	701	0
002 30ms181012 BRCA2-Halo PCNA-iRFP IR tracking	WT G10 -IR	246.1	2.21781	0.426349	713	0
002 30ms181012 BRCA2-Halo PCNA-iRFP IR tracking	WT G10 -IR	248.4	0.00414855	0.115129	722	2
002 30ms181012 BRCA2-Halo PCNA-iRFP IR tracking	WT G10 -IR	255.1	3.25107	0.607395	763	0
002 30ms181012 BRCA2-Halo PCNA-iRFP IR tracking	WT G10 -IR	256.2	0.00713194	0.289388	779	2
002 30ms181012 BRCA2-Halo PCNA-iRFP IR tracking	WT G10 -IR	260.1	0.0958714	-0.0103259	796	0
002 30ms181012 BRCA2-Halo PCNA-iRFP IR tracking	WT G10 -IR	262.3	0.00507157	0.135551	809	2
002 30ms181012 BRCA2-Halo PCNA-iRFP IR tracking	WT G10 -IR	263.2	0.00602461	0.264346	719	2
002 30ms181012 BRCA2-Halo PCNA-iRFP IR tracking	WT G10 -IR	263.3	0.00304284	0.0312123	772	1
002 30ms181012 BRCA2-Halo PCNA-iRFP IR tracking	WT G10 -IR	263.4	0.00142279	0.19385	786	2
002 30ms181012 BRCA2-Halo PCNA-iRFP IR tracking	WT G10 -IR	266.1	0.1925	-0.0564907	819	0
002 30ms181012 BRCA2-Halo PCNA-iRFP IR tracking	WT G10 -IR	270.1	0.397352	-0.0641784	845	0
002 30ms181012 BRCA2-Halo PCNA-iRFP IR tracking	WT G10 -IR	270.6	0.00480588	0.130674	868	2
002 30ms181012 BRCA2-Halo PCNA-iRFP IR tracking	WT G10 -IR	275.1	0.00144042	0.129273	851	2
002 30ms181012 BRCA2-Halo PCNA-iRFP IR tracking	WT G10 -IR	279.1	0.833375	0.325495	877	0
002 30ms181012 BRCA2-Halo PCNA-iRFP IR tracking	WT G10 -IR	282.1	1.09303	0.555259	932	0
002 30ms181012 BRCA2-Halo PCNA-iRFP IR tracking	WT G10 -IR	283.1	0.144396	0.367341	925	1
002 30ms181012 BRCA2-Halo PCNA-iRFP IR tracking	WT G10 -IR	288.5	0.0847905	0.333929	969	1
002 30ms181012 BRCA2-Halo PCNA-iRFP IR tracking	WT G10 -IR	296.1	0.895115	0.259837	999	0
002 30ms181012 BRCA2-Halo PCNA-iRFP IR tracking	WT G10 -IR	296.3	1.41362	0.420789	1017	0
002 30ms181012 BRCA2-Halo PCNA-iRFP IR tracking	WT G10 -IR	298.9	0.317469	0.348914	1042	0
002 30ms181012 BRCA2-Halo PCNA-iRFP IR tracking	WT G10 -IR	301.2	0.0047337	0.113151	1029	2
002 30ms181012 BRCA2-Halo PCNA-iRFP IR tracking	WT G10 -IR	302.3	0.00632508	0.361474	1062	2
002 30ms181012 BRCA2-Halo PCNA-iRFP IR tracking	WT G10 -IR	314.2	0.0188966	0.139833	1111	1
002 30ms181012 BRCA2-Halo PCNA-iRFP IR tracking	WT G10 -IR	317.1	0.652015	0.27613	1118	0
002 30ms181012 BRCA2-Halo PCNA-iRFP IR tracking	WT G10 -IR	321.9	0.691713	0.40378	1162	0
002 30ms181012 BRCA2-Halo PCNA-iRFP IR tracking	WT G10 -IR	323.4	0.184866	0.122646	1156	1
002 30ms181012 BRCA2-Halo PCNA-iRFP IR tracking	WT G10 -IR	325.1	1.29076	0.531706	1183	0
002 30ms181012 BRCA2-Halo PCNA-iRFP IR tracking	WT G10 -IR	331.1	0.95394	0.289579	1207	0
002 30ms181012 BRCA2-Halo PCNA-iRFP IR tracking	WT G10 -IR	331.7	0.281297	0.203037	1239	0
002 30ms181012 BRCA2-Halo PCNA-iRFP IR tracking	WT G10 -IR	333.2	0.00617771	0.160425	1240	2
002 30ms181012 BRCA2-Halo PCNA-iRFP IR tracking	WT G10 -IR	338.1	0.000595431	0.181744	1240	2
002 30ms181012 BRCA2-Halo PCNA-iRFP IR tracking	WT G10 -IR	341.1	1.54509	0.454837	1345	0
002 30ms181012 BRCA2-Halo PCNA-iRFP IR tracking	WT G10 -IR	345.2	0.0064329	0.384502	1413	2
002 30ms181012 BRCA2-Halo PCNA-iRFP IR tracking	WT G10 -IR	345.4	0.00307822	0.206336	1435	2
002 30ms181012 BRCA2-Halo PCNA-iRFP IR tracking	WT G10 -IR	346.2	0.00849334	0.280767	1473	2
002 30ms181012 BRCA2-Halo PCNA-iRFP IR tracking	WT G10 -IR	347.3	0.00055962	0.136181	1418	2
002 30ms181012 BRCA2-Halo PCNA-iRFP IR tracking	WT G10 -IR	348.1	0.000808239	0.0513536	1424	2
002 30ms181012 BRCA2-Halo PCNA-iRFP IR tracking	WT G10 -IR	358.2	0.00263294	0.26846	1636	2
002 30ms181012 BRCA2-Halo PCNA-iRFP IR tracking	WT G10 -IR	364.1	0.627397	0.101312	1737	0
002 30ms181012 BRCA2-Halo PCNA-iRFP IR tracking	WT G10 -IR	366.1	0.127439	0.139239	1784	0
002 30ms181012 BRCA2-Halo PCNA-iRFP IR tracking	WT G10 -IR	370.2	0.00275802	0.389029	1797	2
002 30ms181012 BRCA2-Halo PCNA-iRFP IR tracking	WT G10 -IR	370.4	0.00556838	0.369576	1816	2
002 30ms181012 BRCA2-Halo PCNA-iRFP IR tracking	WT G10 -IR	377.6	0.18476	0.0417413	1890	0
002 30ms181012 BRCA2-Halo PCNA-iRFP IR tracking	WT G10 -IR	380.1	0.00180113	-0.0351128	1900	2
002 30ms181012 BRCA2-Halo PCNA-iRFP IR tracking	WT G10 -IR	385.1	0.136364	0.454379	1946	0
002 30ms181012 BRCA2-Halo PCNA-iRFP IR tracking	WT G10 -IR	388.1	0.508866	0.314096	1959	0
003 30ms181005 BRCA2-Halo PCNA-iRFP IR tracking	WT G10 -IR	0.2	0.0123513	0.190366	6	2
003 30ms181005 BRCA2-Halo PCNA-iRFP IR tracking	WT G10 -IR	5.2	0.00284066	0.188605	1	2
003 30ms181005 BRCA2-Halo PCNA-iRFP IR tracking	WT G10 -IR	5.3	2.14424	0.480338	12	0
003 30ms181005 BRCA2-Halo PCNA-iRFP IR tracking	WT G10 -IR	13.1	0.0228879	0.258391	10	1
003 30ms181005 BRCA2-Halo PCNA-iRFP IR tracking	WT G10 -IR	16.5	0.746326	0.196651	17	0
003 30ms181005 BRCA2-Halo PCNA-iRFP IR tracking	WT G10 -IR	18.1	1.47985	0.229823	18	0
003 30ms181005 BRCA2-Halo PCNA-iRFP IR tracking	WT G10 -IR	19.1	0.605606	0.0291659	24	0
003 30ms181005 BRCA2-Halo PCNA-iRFP IR tracking	WT G10 -IR	22.1	1.20958	0.503655	33	0
003 30ms181005 BRCA2-Halo PCNA-iRFP IR tracking	WT G10 -IR	28.8	0.00174924	-0.113927	22	1
003 30ms181005 BRCA2-Halo PCNA-iRFP IR tracking	WT G10 -IR	30.1	0.00592845	0.171479	0	2
003 30ms181005 BRCA2-Halo PCNA-iRFP IR tracking	WT G10 -IR	32.1	1.2869	0.272662	43	0
003 30ms181005 BRCA2-Halo PCNA-iRFP IR tracking	WT G10 -IR	33.1	0.00301284	0.227325	0	2
003 30ms181005 BRCA2-Halo PCNA-iRFP IR tracking	WT G10 -IR	35.1	3.38475	0.405581	65	0
003 30ms181005 BRCA2-Halo PCNA-iRFP IR tracking	WT G10 -IR	38.1	2.30031	0.425144	67	0
003 30ms181005 BRCA2-Halo PCNA-iRFP IR tracking	WT G10 -IR	39.2	1.42213	0.440203	74	0
003 30ms181005 BRCA2-Halo PCNA-iRFP IR tracking	WT G10 -IR	39.8	0.541152	0.473228	122	0
003 30ms181005 BRCA2-Halo PCNA-iRFP IR tracking	WT G10 -IR	41.1	0.661936	0.357331	67	0
003 30ms181005 BRCA2-Halo PCNA-iRFP IR tracking	WT G10 -IR	42.1	0.00105821	0.176862	84	2
003 30ms181005 BRCA2-Halo PCNA-iRFP IR tracking	WT G10 -IR	56.1	0.926398	0.339639	85	0
003 30ms181005 BRCA2-Halo PCNA-iRFP IR tracking	WT G10 -IR	59.3	0.708022	0.11068	111	0
003 30ms181005 BRCA2-Halo PCNA-iRFP IR tracking	WT G10 -IR	63.2	0.528221	0.695671	92	0
003 30ms181005 BRCA2-Halo PCNA-iRFP IR tracking	WT G10 -IR	63.3	0.215899	0.538477	105	1
003 30ms181005 BRCA2-Halo PCNA-iRFP IR tracking	WT G10 -IR	63.4	6.5514	0.596584	116	0
003 30ms181005 BRCA2-Halo PCNA-iRFP IR tracking	WT G10 -IR	64.1	0.352608	-0.0473577	105	0
003 30ms181005 BRCA2-Halo PCNA-iRFP IR tracking	WT G10 -IR	68.1	3.81281	0.726291	91	0
003 30ms181005 BRCA2-Halo PCNA-iRFP IR tracking	WT G10 -IR	69.1	0.00862641	0.223967	109	2
003 30ms181005 BRCA2-Halo PCNA-iRFP IR tracking	WT G10 -IR	69.2	0.000135221	-0.0932529	120	1
003 30ms181005 BRCA2-Halo PCNA-iRFP IR tracking	WT G10 -IR	69.8	2.92623	0.411433	152	0
003 30ms181005 BRCA2-Halo PCNA-iRFP IR tracking	WT G10 -IR	71.1	0.00128228	0.0601238	0	2
003 30ms181005 BRCA2-Halo PCNA-iRFP IR tracking	WT G10 -IR	71.5	0.00161322	0.130023	69	2
003 30ms181005 BRCA2-Halo PCNA-iRFP IR tracking	WT G10 -IR	73.1	0.475412	0.15648	74	0
003 30ms181005 BRCA2-Halo PCNA-iRFP IR tracking	WT G10 -IR	73.2	0.288535	0.686503	87	1
003 30ms181005 BRCA2-Halo PCNA-iRFP IR tracking	WT G10 -IR	75.3	0.000805504	-0.0351621	10	2
003 30ms181005 BRCA2-Halo PCNA-iRFP IR tracking	WT G10 -IR	75.4	0.403926	0.325915	44	0
003 30ms181005 BRCA2-Halo PCNA-iRFP IR tracking	WT G10 -IR	75.8	0.00461288	0.225801	64	2
003 30ms181005 BRCA2-Halo PCNA-iRFP IR tracking	WT G10 -IR	76.1	0.000542064	0.022124	67	2
003 30ms181005 BRCA2-Halo PCNA-iRFP IR tracking	WT G10 -IR	76.2	0.278826	0.198596	102	0
003 30ms181005 BRCA2-Halo PCNA-iRFP IR tracking	WT G10 -IR	79.1	0.992222	0.350864	135	0
003 30ms181005 BRCA2-Halo PCNA-iRFP IR tracking	WT G10 -IR	80.1	0.501229	0.276994	68	0
003 30ms181005 BRCA2-Halo PCNA-iRFP IR tracking	WT G10 -IR	80.13	0.00346237	0.150131	156	2
003 30ms181005 BRCA2-Halo PCNA-iRFP IR tracking	WT G10 -IR	80.3	0.537945	0.645829	83	0
003 30ms181005 BRCA2-Halo PCNA-iRFP IR tracking	WT G10 -IR	81.1	0.65242	0.416026	139	2
003 30ms181005 BRCA2-Halo PCNA-iRFP IR tracking	WT G10 -IR	83.3	1.35917	0.432297	133	0
003 30ms181005 BRCA2-Halo PCNA-iRFP IR tracking	WT G10 -IR	84.1	0.0920256	0.381892	114	1
003 30ms181005 BRCA2-Halo PCNA-iRFP IR tracking	WT G10 -IR	84.3	0.067792	0.490856	133	1
003 30ms181005 BRCA2-Halo PCNA-iRFP IR tracking	WT G10 -IR	87.2	0.00157329	0.160843	126	2
003 30ms181005 BRCA2-Halo PCNA-iRFP IR tracking	WT G10 -IR	87.4	0.00160096	0.193848	159	2
003 30ms181005 BRCA2-Halo PCNA-iRFP IR tracking	WT G10 -IR	88.3	0.117397	0.307436	139	0
003 30ms181005 BRCA2-Halo PCNA-iRFP IR tracking	WT G10 -IR	89.2	0.0290965	0.392741	137	1
003 30ms181005 BRCA2-Halo PCNA-iRFP IR tracking	WT G10 -IR	90.1	0.0039225	0.305342	67	2
003 30ms181005 BRCA2-Halo PCNA-iRFP IR tracking	WT G10 -IR	91.2	0.0140802	0.120402	138	1
003 30ms181005 BRCA2-Halo PCNA-iRFP IR tracking	WT G10 -IR	92.1	0.00192161	0.0912389	197	1
003 30ms181005 BRCA2-Halo PCNA-iRFP IR tracking	WT G10 -IR	92.3	1.08376	0.289231	145	0
003 30ms181005 BRCA2-Halo PCNA-iRFP IR tracking	WT G10 -IR	93.1	0.328335	0.24566	135	2
003 30ms181005 BRCA2-Halo PCNA-iRFP IR tracking	WT G10 -IR	95.1	0.611882	0.477124	138	0
003 30ms181005 BRCA2-Halo PCNA-iRFP IR tracking	WT G10 -IR	105.1	2.26305	0.376409	153	0
003 30ms181005 BRCA2-Halo PCNA-iRFP IR tracking	WT G10 -IR	108.2	0.00150493	0.0983827	135	2
003 30ms181005 BRCA2-Halo PCNA-iRFP IR tracking	WT G10 -IR	112.1	0.00410269	0.172052	69	2
003 30ms181005 BRCA2-Halo PCNA-iRFP IR tracking	WT G10 -IR	113.1	0.38438	0.169364	178	0
003 30ms181005 BRCA2-Halo PCNA-iRFP IR tracking	WT G10 -IR	117.1	0.00764593	0.461574	67	2
003 30ms181005 BRCA2-Halo PCNA-iRFP IR tracking	WT G10 -IR	117.3	0.00223169	0.360504	106	2
003 30ms181005 BRCA2-Halo PCNA-iRFP IR tracking	WT G10 -IR	120.5	0.027417	0.298398	175	1
003 30ms181005 BRCA2-Halo PCNA-iRFP IR tracking	WT G10 -IR	121.1	1.64724	0.248201	187	0
003 30ms181005 BRCA2-Halo PCNA-iRFP IR tracking	WT G10 -IR	122.2	0.00401716	0.449069	119	2
003 30ms181005 BRCA2-Halo PCNA-iRFP IR tracking	WT G10 -IR	125.1	1.36091	0.224739	188	0
003 30ms181005 BRCA2-Halo PCNA-iRFP IR tracking	WT G10 -IR	126.1	2.64037	0.402478	191	0
003 30ms181005 BRCA2-Halo PCNA-iRFP IR tracking	WT G10 -IR	127.1	0.00250319	0.15395	173	2
003 30ms181005 BRCA2-Halo PCNA-iRFP IR tracking	WT G10 -IR	129.2	0.00837609	0.184688	162	2
003 30ms181005 BRCA2-Halo PCNA-iRFP IR tracking	WT G10 -IR	129.4	0.00873236	0.392229	184	2
003 30ms181005 BRCA2-Halo PCNA-iRFP IR tracking	WT G10 -IR	130.1	1.53709	0.412865	189	0
003 30ms181005 BRCA2-Halo PCNA-iRFP IR tracking	WT G10 -IR	131.1	0.215419	0.127352	108	0
003 30ms181005 BRCA2-Halo PCNA-iRFP IR tracking	WT G10 -IR	131.16	0.0219276	0.308895	239	2
003 30ms181005 BRCA2-Halo PCNA-iRFP IR tracking	WT G10 -IR	131.17	0.191045	0.440722	255	1
003 30ms181005 BRCA2-Halo PCNA-iRFP IR tracking	WT G10 -IR	131.23	0.29826	0.194459	290	1
003 30ms181005 BRCA2-Halo PCNA-iRFP IR tracking	WT G10 -IR	131.8	0.0168655	0.388836	148	1
003 30ms181005 BRCA2-Halo PCNA-iRFP IR tracking	WT G10 -IR	137.12	0.00131857	0.0177465	129	2
003 30ms181005 BRCA2-Halo PCNA-iRFP IR tracking	WT G10 -IR	137.16	0.0222334	-0.00907126	221	2
003 30ms181005 BRCA2-Halo PCNA-iRFP IR tracking	WT G10 -IR	141.1	0.974235	0.266176	208	0
003 30ms181005 BRCA2-Halo PCNA-iRFP IR tracking	WT G10 -IR	141.3	1.47122	0.542718	233	0
003 30ms181005 BRCA2-Halo PCNA-iRFP IR tracking	WT G10 -IR	143.4	0.00135034	-0.0447095	215	2
003 30ms181005 BRCA2-Halo PCNA-iRFP IR tracking	WT G10 -IR	144.1	2.24168	0.539562	164	0
003 30ms181005 BRCA2-Halo PCNA-iRFP IR tracking	WT G10 -IR	144.2	0.000228287	0.0840807	190	2
003 30ms181005 BRCA2-Halo PCNA-iRFP IR tracking	WT G10 -IR	155.1	0.548555	0.0149899	220	0
003 30ms181005 BRCA2-Halo PCNA-iRFP IR tracking	WT G10 -IR	158.3	0.911687	0.229961	193	0
003 30ms181005 BRCA2-Halo PCNA-iRFP IR tracking	WT G10 -IR	163.2	0.153296	0.657095	230	1
003 30ms181005 BRCA2-Halo PCNA-iRFP IR tracking	WT G10 -IR	166.2	0.00348191	-0.0251247	241	1
003 30ms181005 BRCA2-Halo PCNA-iRFP IR tracking	WT G10 -IR	167.1	0.967649	0.163691	211	0
003 30ms181005 BRCA2-Halo PCNA-iRFP IR tracking	WT G10 -IR	167.2	0.00457033	0.265408	225	2
003 30ms181005 BRCA2-Halo PCNA-iRFP IR tracking	WT G10 -IR	172.1	3.80394	0.586795	259	0
003 30ms181005 BRCA2-Halo PCNA-iRFP IR tracking	WT G10 -IR	173.2	0.000448912	-0.182246	257	2
003 30ms181005 BRCA2-Halo PCNA-iRFP IR tracking	WT G10 -IR	173.4	2.695	0.51847	272	0
003 30ms181005 BRCA2-Halo PCNA-iRFP IR tracking	WT G10 -IR	173.5	0.00562174	0.32524	288	2
003 30ms181005 BRCA2-Halo PCNA-iRFP IR tracking	WT G10 -IR	174.1	0.616647	0.215957	275	0
003 30ms181005 BRCA2-Halo PCNA-iRFP IR tracking	WT G10 -IR	175.1	0.424052	-0.167308	273	0
003 30ms181005 BRCA2-Halo PCNA-iRFP IR tracking	WT G10 -IR	176.3	0.00153628	0.0746921	270	1
003 30ms181005 BRCA2-Halo PCNA-iRFP IR tracking	WT G10 -IR	179.3	3.20994	0.373209	283	0
003 30ms181005 BRCA2-Halo PCNA-iRFP IR tracking	WT G10 -IR	185.12	0.375615	0.110958	331	2
003 30ms181005 BRCA2-Halo PCNA-iRFP IR tracking	WT G10 -IR	185.2	0.0103847	0.290972	264	2
003 30ms181005 BRCA2-Halo PCNA-iRFP IR tracking	WT G10 -IR	185.5	0.00719211	0.224307	283	1
003 30ms181005 BRCA2-Halo PCNA-iRFP IR tracking	WT G10 -IR	192.1	0.325104	0.413027	322	0
003 30ms181005 BRCA2-Halo PCNA-iRFP IR tracking	WT G10 -IR	193.3	0.925899	-0.0408069	320	0
003 30ms181005 BRCA2-Halo PCNA-iRFP IR tracking	WT G10 -IR	197.2	0.291322	0.603926	317	1
003 30ms181005 BRCA2-Halo PCNA-iRFP IR tracking	WT G10 -IR	199.3	0.00665902	0.213527	329	1
003 30ms181005 BRCA2-Halo PCNA-iRFP IR tracking	WT G10 -IR	199.5	0.00347328	0.13356	347	2
003 30ms181005 BRCA2-Halo PCNA-iRFP IR tracking	WT G10 -IR	199.7	0.00732074	0.195516	359	2
003 30ms181005 BRCA2-Halo PCNA-iRFP IR tracking	WT G10 -IR	204.3	0.00277731	0.232204	271	2
003 30ms181005 BRCA2-Halo PCNA-iRFP IR tracking	WT G10 -IR	207.1	0.00465806	0.229383	283	2
003 30ms181005 BRCA2-Halo PCNA-iRFP IR tracking	WT G10 -IR	207.5	0.00198095	-0.0234862	330	2
003 30ms181005 BRCA2-Halo PCNA-iRFP IR tracking	WT G10 -IR	214.1	1.76145	0.534916	352	0
003 30ms181005 BRCA2-Halo PCNA-iRFP IR tracking	WT G10 -IR	224.4	0.000845359	0.273206	387	2
003 30ms181005 BRCA2-Halo PCNA-iRFP IR tracking	WT G10 -IR	226.1	1.95189	0.477339	405	0
003 30ms181005 BRCA2-Halo PCNA-iRFP IR tracking	WT G10 -IR	228.1	0.860837	0.239883	407	0
003 30ms181005 BRCA2-Halo PCNA-iRFP IR tracking	WT G10 -IR	229.1	0.000986779	0.120385	279	2
003 30ms181005 BRCA2-Halo PCNA-iRFP IR tracking	WT G10 -IR	229.3	0.00328916	0.136284	325	2
003 30ms181005 BRCA2-Halo PCNA-iRFP IR tracking	WT G10 -IR	229.5	0.00483624	0.179034	384	2
003 30ms181005 BRCA2-Halo PCNA-iRFP IR tracking	WT G10 -IR	232.1	0.191567	0.629598	380	1
003 30ms181005 BRCA2-Halo PCNA-iRFP IR tracking	WT G10 -IR	234.1	0.00478831	0.195309	381	2
003 30ms181005 BRCA2-Halo PCNA-iRFP IR tracking	WT G10 -IR	234.4	0.0096243	0.282266	435	2
003 30ms181005 BRCA2-Halo PCNA-iRFP IR tracking	WT G10 -IR	237.1	1.86083	0.472936	433	0
003 30ms181005 BRCA2-Halo PCNA-iRFP IR tracking	WT G10 -IR	238.1	0.862052	0.356338	442	0
003 30ms181005 BRCA2-Halo PCNA-iRFP IR tracking	WT G10 -IR	241.1	0.971971	0.0659327	475	0
003 30ms181005 BRCA2-Halo PCNA-iRFP IR tracking	WT G10 -IR	242.1	2.62217	0.531392	480	0
003 30ms181005 BRCA2-Halo PCNA-iRFP IR tracking	WT G10 -IR	243.1	1.1073	0.379731	415	0
003 30ms181005 BRCA2-Halo PCNA-iRFP IR tracking	WT G10 -IR	244.1	1.15556	0.549726	481	0
003 30ms181005 BRCA2-Halo PCNA-iRFP IR tracking	WT G10 -IR	245.5	0.029194	0.18731	486	1
003 30ms181005 BRCA2-Halo PCNA-iRFP IR tracking	WT G10 -IR	258.1	0.678937	0.0561561	524	0
003 30ms181005 BRCA2-Halo PCNA-iRFP IR tracking	WT G10 -IR	259.1	1.43522	0.269125	509	0
003 30ms181005 BRCA2-Halo PCNA-iRFP IR tracking	WT G10 -IR	261.12	0.0142744	0.19725	539	1
003 30ms181005 BRCA2-Halo PCNA-iRFP IR tracking	WT G10 -IR	261.2	0.00811292	0.211028	394	2
003 30ms181005 BRCA2-Halo PCNA-iRFP IR tracking	WT G10 -IR	261.6	0.00527354	0.174616	446	2
003 30ms181005 BRCA2-Halo PCNA-iRFP IR tracking	WT G10 -IR	261.8	0.00284299	0.102763	490	2
003 30ms181005 BRCA2-Halo PCNA-iRFP IR tracking	WT G10 -IR	262.11	0.248747	0.508186	538	1
003 30ms181005 BRCA2-Halo PCNA-iRFP IR tracking	WT G10 -IR	262.9	0.0275548	0.0853773	520	1
003 30ms181005 BRCA2-Halo PCNA-iRFP IR tracking	WT G10 -IR	265.1	0.027182	0.42081	545	2
003 30ms181005 BRCA2-Halo PCNA-iRFP IR tracking	WT G10 -IR	268.1	0.98774	0.41443	557	0
003 30ms181005 BRCA2-Halo PCNA-iRFP IR tracking	WT G10 -IR	269.2	0.166099	0.58541	561	1
003 30ms181005 BRCA2-Halo PCNA-iRFP IR tracking	WT G10 -IR	272.9	1.44238	0.275596	628	0
003 30ms181005 BRCA2-Halo PCNA-iRFP IR tracking	WT G10 -IR	277.1	1.15237	0.11247	610	0
003 30ms181005 BRCA2-Halo PCNA-iRFP IR tracking	WT G10 -IR	279.2	0.00664538	0.298046	608	2
003 30ms181005 BRCA2-Halo PCNA-iRFP IR tracking	WT G10 -IR	282.3	0.0233143	0.426147	577	1
003 30ms181005 BRCA2-Halo PCNA-iRFP IR tracking	WT G10 -IR	282.4	0.0159315	0.380123	612	2
003 30ms181005 BRCA2-Halo PCNA-iRFP IR tracking	WT G10 -IR	283.2	0.03129	0.197728	592	1
003 30ms181005 BRCA2-Halo PCNA-iRFP IR tracking	WT G10 -IR	283.5	0.00904998	0.146333	608	2
003 30ms181005 BRCA2-Halo PCNA-iRFP IR tracking	WT G10 -IR	283.7	0.00635842	0.28419	625	2
003 30ms181005 BRCA2-Halo PCNA-iRFP IR tracking	WT G10 -IR	286.1	0.0013649	0.12292	624	2
003 30ms181005 BRCA2-Halo PCNA-iRFP IR tracking	WT G10 -IR	293.2	0.00704404	0.192363	539	2
003 30ms181005 BRCA2-Halo PCNA-iRFP IR tracking	WT G10 -IR	293.5	0.0077076	0.128036	623	2
003 30ms181005 BRCA2-Halo PCNA-iRFP IR tracking	WT G10 -IR	293.7	0.00066367	0.017087	636	2
003 30ms181005 BRCA2-Halo PCNA-iRFP IR tracking	WT G10 -IR	300.2	0.00612459	0.268969	527	2
003 30ms181005 BRCA2-Halo PCNA-iRFP IR tracking	WT G10 -IR	300.4	0.00289106	0.195018	603	2
003 30ms181005 BRCA2-Halo PCNA-iRFP IR tracking	WT G10 -IR	300.6	0.00229572	0.0890556	752	2
003 30ms181005 BRCA2-Halo PCNA-iRFP IR tracking	WT G10 -IR	302.2	0.0358513	0.237421	666	1
003 30ms181005 BRCA2-Halo PCNA-iRFP IR tracking	WT G10 -IR	310.3	0.790198	0.0487547	702	0
003 30ms181005 BRCA2-Halo PCNA-iRFP IR tracking	WT G10 -IR	310.9	2.56073	0.29094	738	0
003 30ms181005 BRCA2-Halo PCNA-iRFP IR tracking	WT G10 -IR	319.1	3.43678	0.478102	719	0
003 30ms181005 BRCA2-Halo PCNA-iRFP IR tracking	WT G10 -IR	321.4	0.820139	0.671624	713	0
003 30ms181005 BRCA2-Halo PCNA-iRFP IR tracking	WT G10 -IR	323.1	0.551663	0.448591	725	0
003 30ms181005 BRCA2-Halo PCNA-iRFP IR tracking	WT G10 -IR	325.1	0.455097	0.133779	736	0
003 30ms181005 BRCA2-Halo PCNA-iRFP IR tracking	WT G10 -IR	326.1	0.000348153	0.0663043	722	2
003 30ms181005 BRCA2-Halo PCNA-iRFP IR tracking	WT G10 -IR	327.4	0.972972	0.00681184	753	0
003 30ms181005 BRCA2-Halo PCNA-iRFP IR tracking	WT G10 -IR	328.1	0.520602	0.361594	749	0
003 30ms181005 BRCA2-Halo PCNA-iRFP IR tracking	WT G10 -IR	333.1	1.04862	0.15672	747	0
003 30ms181005 BRCA2-Halo PCNA-iRFP IR tracking	WT G10 -IR	335.1	0.804266	0.323774	747	0
003 30ms181005 BRCA2-Halo PCNA-iRFP IR tracking	WT G10 -IR	339.11	0.415475	0.0573248	770	0
003 30ms181005 BRCA2-Halo PCNA-iRFP IR tracking	WT G10 -IR	339.2	0.432525	0.564641	727	1
003 30ms181005 BRCA2-Halo PCNA-iRFP IR tracking	WT G10 -IR	340.1	0.387156	0.426604	747	0
003 30ms181005 BRCA2-Halo PCNA-iRFP IR tracking	WT G10 -IR	340.2	0.268067	0.38185	765	1
003 30ms181005 BRCA2-Halo PCNA-iRFP IR tracking	WT G10 -IR	342.1	1.84645	0.363897	774	0
003 30ms181005 BRCA2-Halo PCNA-iRFP IR tracking	WT G10 -IR	343.1	7.56287	0.589008	779	0
003 30ms181005 BRCA2-Halo PCNA-iRFP IR tracking	WT G10 -IR	344.1	0.439214	0.301958	783	0
003 30ms181005 BRCA2-Halo PCNA-iRFP IR tracking	WT G10 -IR	345.5	0.0234357	0.244244	792	1
003 30ms181005 BRCA2-Halo PCNA-iRFP IR tracking	WT G10 -IR	345.6	0.0386856	0.741836	807	2
003 30ms181005 BRCA2-Halo PCNA-iRFP IR tracking	WT G10 -IR	345.8	0.00536562	0.330727	829	2
003 30ms181005 BRCA2-Halo PCNA-iRFP IR tracking	WT G10 -IR	345.9	0.0616519	0.610721	849	1
003 30ms181005 BRCA2-Halo PCNA-iRFP IR tracking	WT G10 -IR	348.1	2.61883	0.449756	793	0
003 30ms181005 BRCA2-Halo PCNA-iRFP IR tracking	WT G10 -IR	352.1	0.0680386	0.417011	778	0
003 30ms181005 BRCA2-Halo PCNA-iRFP IR tracking	WT G10 -IR	352.2	0.0806384	0.43153	790	1
003 30ms181005 BRCA2-Halo PCNA-iRFP IR tracking	WT G10 -IR	353.3	1.33098	0.20484	810	0
003 30ms181005 BRCA2-Halo PCNA-iRFP IR tracking	WT G10 -IR	354.1	0.00936442	0.312152	802	2
003 30ms181005 BRCA2-Halo PCNA-iRFP IR tracking	WT G10 -IR	354.5	0.0103674	0.501519	839	2
003 30ms181005 BRCA2-Halo PCNA-iRFP IR tracking	WT G10 -IR	354.7	0.00121771	0.0174689	897	2
003 30ms181005 BRCA2-Halo PCNA-iRFP IR tracking	WT G10 -IR	357.1	0.236432	0.0428328	810	0
003 30ms181005 BRCA2-Halo PCNA-iRFP IR tracking	WT G10 -IR	359.2	0.0390989	0.233078	817	1
003 30ms181005 BRCA2-Halo PCNA-iRFP IR tracking	WT G10 -IR	360.4	0.0112169	0.0892878	804	1
003 30ms181005 BRCA2-Halo PCNA-iRFP IR tracking	WT G10 -IR	360.6	0.0171009	0.123561	821	1
003 30ms181005 BRCA2-Halo PCNA-iRFP IR tracking	WT G10 -IR	362.2	0.00551202	0.119377	830	2
003 30ms181005 BRCA2-Halo PCNA-iRFP IR tracking	WT G10 -IR	363.1	0.329427	0.458978	831	0
003 30ms181005 BRCA2-Halo PCNA-iRFP IR tracking	WT G10 -IR	365.2	0.067276	0.238524	843	1
003 30ms181005 BRCA2-Halo PCNA-iRFP IR tracking	WT G10 -IR	370.1	0.00157799	0.303524	826	2
003 30ms181005 BRCA2-Halo PCNA-iRFP IR tracking	WT G10 -IR	376.1	0.000327974	0.0277343	863	2
003 30ms181005 BRCA2-Halo PCNA-iRFP IR tracking	WT G10 -IR	378.1	0.699979	0.607274	886	0
003 30ms181005 BRCA2-Halo PCNA-iRFP IR tracking	WT G10 -IR	379.1	1.89047	0.250149	893	0
003 30ms181005 BRCA2-Halo PCNA-iRFP IR tracking	WT G10 -IR	379.2	0.00415195	0.419952	907	2
003 30ms181005 BRCA2-Halo PCNA-iRFP IR tracking	WT G10 -IR	380.1	0.00172883	0.265516	871	2
003 30ms181005 BRCA2-Halo PCNA-iRFP IR tracking	WT G10 -IR	381.1	0.310662	0.418659	897	1
003 30ms181005 BRCA2-Halo PCNA-iRFP IR tracking	WT G10 -IR	384.2	0.00535422	0.162432	906	2
003 30ms181005 BRCA2-Halo PCNA-iRFP IR tracking	WT G10 -IR	385.3	2.29843	0.667051	890	0
003 30ms181005 BRCA2-Halo PCNA-iRFP IR tracking	WT G10 -IR	387.2	0.050882	0.354929	895	1
003 30ms181005 BRCA2-Halo PCNA-iRFP IR tracking	WT G10 -IR	390.1	0.752972	0.208638	924	0
003 30ms181005 BRCA2-Halo PCNA-iRFP IR tracking	WT G10 -IR	392.8	0.102494	0.447381	947	1
003 30ms181005 BRCA2-Halo PCNA-iRFP IR tracking	WT G10 -IR	394.2	0.00451975	0.0671636	948	2
003 30ms181005 BRCA2-Halo PCNA-iRFP IR tracking	WT G10 -IR	400.5	0.13698	0.449707	1049	1
003 30ms181005 BRCA2-Halo PCNA-iRFP IR tracking	WT G10 -IR	400.6	0.584817	0.358265	1065	0
003 30ms181005 BRCA2-Halo PCNA-iRFP IR tracking	WT G10 -IR	417.1	1.09572	0.236355	1118	0
003 30ms181005 BRCA2-Halo PCNA-iRFP IR tracking	WT G10 -IR	418.3	0.660317	0.272454	1137	0
003 30ms181005 BRCA2-Halo PCNA-iRFP IR tracking	WT G10 -IR	418.7	0.00162972	0.0450125	1175	2
003 30ms181005 BRCA2-Halo PCNA-iRFP IR tracking	WT G10 -IR	421.3	0.0638161	0.448769	1116	1
003 30ms181005 BRCA2-Halo PCNA-iRFP IR tracking	WT G10 -IR	421.5	0.196185	0.541175	1141	1
003 30ms181005 BRCA2-Halo PCNA-iRFP IR tracking	WT G10 -IR	423.1	0.0286044	-0.0441972	1142	0
003 30ms181005 BRCA2-Halo PCNA-iRFP IR tracking	WT G10 -IR	433.1	0.463474	0.229115	1218	0
003 30ms181005 BRCA2-Halo PCNA-iRFP IR tracking	WT G10 -IR	434.1	1.81963	0.703499	1213	0
003 30ms181005 BRCA2-Halo PCNA-iRFP IR tracking	WT G10 -IR	437.1	1.24181	0.355943	1236	0
003 30ms181005 BRCA2-Halo PCNA-iRFP IR tracking	WT G10 -IR	438.2	0.0136473	0.446414	1232	2
003 30ms181005 BRCA2-Halo PCNA-iRFP IR tracking	WT G10 -IR	440.2	0.0303753	0.421051	1244	1
003 30ms181005 BRCA2-Halo PCNA-iRFP IR tracking	WT G10 -IR	443.1	1.64832	0.250529	1287	0
003 30ms181005 BRCA2-Halo PCNA-iRFP IR tracking	WT G10 -IR	446.1	1.5195	0.254921	1313	0
003 30ms181005 BRCA2-Halo PCNA-iRFP IR tracking	WT G10 -IR	447.1	0.978984	0.177213	1323	0
003 30ms181005 BRCA2-Halo PCNA-iRFP IR tracking	WT G10 -IR	451.1	0.00118516	0.175929	1227	2
003 30ms181005 BRCA2-Halo PCNA-iRFP IR tracking	WT G10 -IR	451.3	0.00076405	0.137245	1268	2
003 30ms181005 BRCA2-Halo PCNA-iRFP IR tracking	WT G10 -IR	465.1	0.00729731	0.354836	1401	2
003 30ms181005 BRCA2-Halo PCNA-iRFP IR tracking	WT G10 -IR	467.1	0.000749403	0.0686526	1312	2
003 30ms181005 BRCA2-Halo PCNA-iRFP IR tracking	WT G10 -IR	468.2	0.000534961	0.0657765	1301	2
003 30ms181005 BRCA2-Halo PCNA-iRFP IR tracking	WT G10 -IR	475.1	2.04335	0.372576	1453	0
003 30ms181005 BRCA2-Halo PCNA-iRFP IR tracking	WT G10 -IR	478.1	0.00106102	0.0366102	1470	1
003 30ms181005 BRCA2-Halo PCNA-iRFP IR tracking	WT G10 -IR	480.3	0.0834092	-0.0254691	1492	0
003 30ms181005 BRCA2-Halo PCNA-iRFP IR tracking	WT G10 -IR	482.1	0.010488	0.250505	1439	2
003 30ms181005 BRCA2-Halo PCNA-iRFP IR tracking	WT G10 -IR	486.1	0.00385487	0.255991	1388	2
003 30ms181005 BRCA2-Halo PCNA-iRFP IR tracking	WT G10 -IR	487.2	0.216853	0.560497	1526	1
003 30ms181005 BRCA2-Halo PCNA-iRFP IR tracking	WT G10 -IR	488.6	0.00618547	0.211152	1549	2
003 30ms181005 BRCA2-Halo PCNA-iRFP IR tracking	WT G10 -IR	488.8	0.00415356	0.204082	1571	2
003 30ms181005 BRCA2-Halo PCNA-iRFP IR tracking	WT G10 -IR	492.3	0.0693743	0.214669	1568	1
003 30ms181005 BRCA2-Halo PCNA-iRFP IR tracking	WT G10 -IR	493.1	0.00684595	0.248761	1509	2
003 30ms181005 BRCA2-Halo PCNA-iRFP IR tracking	WT G10 -IR	494.1	0.0288153	-0.0319909	1599	0
003 30ms181005 BRCA2-Halo PCNA-iRFP IR tracking	WT G10 -IR	494.5	0.0573846	0.494829	1536	1
003 30ms181005 BRCA2-Halo PCNA-iRFP IR tracking	WT G10 -IR	494.7	0.0813131	0.516754	1556	1
003 30ms181005 BRCA2-Halo PCNA-iRFP IR tracking	WT G10 -IR	494.8	0.00295184	0.13971	1575	2
003 30ms181005 BRCA2-Halo PCNA-iRFP IR tracking	WT G10 -IR	494.9	0.14177	0.651027	1586	1
003 30ms181005 BRCA2-Halo PCNA-iRFP IR tracking	WT G10 -IR	498.1	1.92319	0.657172	1629	0
003 30ms181005 BRCA2-Halo PCNA-iRFP IR tracking	WT G10 -IR	499.1	0.74148	0.132464	1635	0
003 30ms181005 BRCA2-Halo PCNA-iRFP IR tracking	WT G10 -IR	501.6	0.0032512	0.204079	1664	2
003 30ms181005 BRCA2-Halo PCNA-iRFP IR tracking	WT G10 -IR	502.1	0.0649662	0.416221	1651	1
003 30ms181005 BRCA2-Halo PCNA-iRFP IR tracking	WT G10 -IR	505.3	6.9384	0.757009	1695	0
003 30ms181005 BRCA2-Halo PCNA-iRFP IR tracking	WT G10 -IR	506.1	1.71101	0.353434	1707	0
003 30ms181005 BRCA2-Halo PCNA-iRFP IR tracking	WT G10 -IR	508.2	0.00342145	0.175938	1729	2
003 30ms181005 BRCA2-Halo PCNA-iRFP IR tracking	WT G10 -IR	508.4	0.00527927	0.213511	1745	2
003 30ms181005 BRCA2-Halo PCNA-iRFP IR tracking	WT G10 -IR	509.2	0.00654477	0.437325	1683	2
003 30ms181005 BRCA2-Halo PCNA-iRFP IR tracking	WT G10 -IR	509.4	0.00445004	0.301556	1701	2
003 30ms181005 BRCA2-Halo PCNA-iRFP IR tracking	WT G10 -IR	510.1	0.00812189	0.218061	1667	2
003 30ms181005 BRCA2-Halo PCNA-iRFP IR tracking	WT G10 -IR	515.1	0.000935709	0.188669	1759	2
003 30ms181005 BRCA2-Halo PCNA-iRFP IR tracking	WT G10 -IR	521.1	0.91748	0.483264	1844	0
003 30ms181005 BRCA2-Halo PCNA-iRFP IR tracking	WT G10 -IR	523.2	0.237436	0.746572	1873	1
003 30ms181005 BRCA2-Halo PCNA-iRFP IR tracking	WT G10 -IR	525.1	2.28171	0.70047	1887	0
003 30ms181005 BRCA2-Halo PCNA-iRFP IR tracking	WT G10 -IR	527.1	0.393529	0.303147	1902	0
003 30ms181005 BRCA2-Halo PCNA-iRFP IR tracking	WT G10 -IR	528.1	0.00410468	0.252097	1878	2
003 30ms181005 BRCA2-Halo PCNA-iRFP IR tracking	WT G10 -IR	529.1	0.00267163	0.237326	1877	2
003 30ms181005 BRCA2-Halo PCNA-iRFP IR tracking	WT G10 -IR	529.3	0.00430848	0.335576	1898	2
003 30ms181005 BRCA2-Halo PCNA-iRFP IR tracking	WT G10 -IR	530.1	0.00279419	0.245212	1861	2
003 30ms181005 BRCA2-Halo PCNA-iRFP IR tracking	WT G10 -IR	530.4	0.0160105	0.304984	1907	1
003 30ms181005 BRCA2-Halo PCNA-iRFP IR tracking	WT G10 -IR	530.5	0.00659784	0.268952	1919	2
003 30ms181005 BRCA2-Halo PCNA-iRFP IR tracking	WT G10 -IR	535.1	0.00466815	0.250437	1943	2
003 30ms181005 BRCA2-Halo PCNA-iRFP IR tracking	WT G10 -IR	536.1	0.00139994	0.0936315	1946	2
003 30ms181005 BRCA2-Halo PCNA-iRFP IR tracking	WT G10 -IR	537.1	0.0040894	0.189399	1948	2
003 30ms181012 BRCA2-Halo PCNA-iRFP IR tracking	WT G10 -IR	2.3	0.00499756	0.373431	9	2
003 30ms181012 BRCA2-Halo PCNA-iRFP IR tracking	WT G10 -IR	10.1	0.0402107	0.24391	0	1
003 30ms181012 BRCA2-Halo PCNA-iRFP IR tracking	WT G10 -IR	16.1	1.72183	0.447744	7	0
003 30ms181012 BRCA2-Halo PCNA-iRFP IR tracking	WT G10 -IR	17.11	0.0143415	0.0798461	59	1
003 30ms181012 BRCA2-Halo PCNA-iRFP IR tracking	WT G10 -IR	17.7	0.036285	0.303023	17	1
003 30ms181012 BRCA2-Halo PCNA-iRFP IR tracking	WT G10 -IR	19.1	0.622319	0.640735	16	0
003 30ms181012 BRCA2-Halo PCNA-iRFP IR tracking	WT G10 -IR	19.3	0.268424	0.119006	65	0
003 30ms181012 BRCA2-Halo PCNA-iRFP IR tracking	WT G10 -IR	23.1	0.0779279	0.165843	17	1
003 30ms181012 BRCA2-Halo PCNA-iRFP IR tracking	WT G10 -IR	26.1	0.149016	0.506891	34	1
003 30ms181012 BRCA2-Halo PCNA-iRFP IR tracking	WT G10 -IR	27.1	0.809276	0.357053	0	0
003 30ms181012 BRCA2-Halo PCNA-iRFP IR tracking	WT G10 -IR	31.6	0.0270561	0.345569	13	1
003 30ms181012 BRCA2-Halo PCNA-iRFP IR tracking	WT G10 -IR	36.1	0.000725719	0.231297	0	2
003 30ms181012 BRCA2-Halo PCNA-iRFP IR tracking	WT G10 -IR	44.2	0.0650481	0.319593	10	1
003 30ms181012 BRCA2-Halo PCNA-iRFP IR tracking	WT G10 -IR	45.1	2.32497	0.491763	43	0
003 30ms181012 BRCA2-Halo PCNA-iRFP IR tracking	WT G10 -IR	48.1	2.2725	0.293219	50	0
003 30ms181012 BRCA2-Halo PCNA-iRFP IR tracking	WT G10 -IR	49.1	0.0725248	0.362172	47	1
003 30ms181012 BRCA2-Halo PCNA-iRFP IR tracking	WT G10 -IR	52.1	0.00536461	0.161422	38	2
003 30ms181012 BRCA2-Halo PCNA-iRFP IR tracking	WT G10 -IR	53.5	2.89831	0.677222	33	0
003 30ms181012 BRCA2-Halo PCNA-iRFP IR tracking	WT G10 -IR	54.1	0.608834	-0.0350414	50	0
003 30ms181012 BRCA2-Halo PCNA-iRFP IR tracking	WT G10 -IR	62.1	0.781009	0.27697	54	0
003 30ms181012 BRCA2-Halo PCNA-iRFP IR tracking	WT G10 -IR	67.1	1.20891	0.30029	69	0
003 30ms181012 BRCA2-Halo PCNA-iRFP IR tracking	WT G10 -IR	68.1	1.04117	0.727725	18	0
003 30ms181012 BRCA2-Halo PCNA-iRFP IR tracking	WT G10 -IR	68.2	0.00618016	0.191707	29	2
003 30ms181012 BRCA2-Halo PCNA-iRFP IR tracking	WT G10 -IR	71.1	0.188889	0.0741531	71	0
003 30ms181012 BRCA2-Halo PCNA-iRFP IR tracking	WT G10 -IR	72.5	0.358507	0.300053	30	0
003 30ms181012 BRCA2-Halo PCNA-iRFP IR tracking	WT G10 -IR	82.1	2.00749	0.257752	80	0
003 30ms181012 BRCA2-Halo PCNA-iRFP IR tracking	WT G10 -IR	84.1	1.25394	0.525885	81	0
003 30ms181012 BRCA2-Halo PCNA-iRFP IR tracking	WT G10 -IR	90.1	1.65888	0.327894	80	0
003 30ms181012 BRCA2-Halo PCNA-iRFP IR tracking	WT G10 -IR	96.1	0.586804	0.311132	87	0
003 30ms181012 BRCA2-Halo PCNA-iRFP IR tracking	WT G10 -IR	96.3	0.434798	0.0400741	103	0
003 30ms181012 BRCA2-Halo PCNA-iRFP IR tracking	WT G10 -IR	100.8	0.194769	0.0544463	115	0
003 30ms181012 BRCA2-Halo PCNA-iRFP IR tracking	WT G10 -IR	101.1	0.00188087	-0.0145611	96	2
003 30ms181012 BRCA2-Halo PCNA-iRFP IR tracking	WT G10 -IR	102.1	0.745188	0.348622	85	0
003 30ms181012 BRCA2-Halo PCNA-iRFP IR tracking	WT G10 -IR	105.1	1.01891	0.223347	101	0
003 30ms181012 BRCA2-Halo PCNA-iRFP IR tracking	WT G10 -IR	105.2	0.239213	0.416491	121	1
003 30ms181012 BRCA2-Halo PCNA-iRFP IR tracking	WT G10 -IR	105.4	0.0162282	0.289946	140	2
003 30ms181012 BRCA2-Halo PCNA-iRFP IR tracking	WT G10 -IR	105.7	0.214924	0.586212	173	1
003 30ms181012 BRCA2-Halo PCNA-iRFP IR tracking	WT G10 -IR	107.1	1.26183	0.220108	103	0
003 30ms181012 BRCA2-Halo PCNA-iRFP IR tracking	WT G10 -IR	108.1	3.07893	0.512847	99	0
003 30ms181012 BRCA2-Halo PCNA-iRFP IR tracking	WT G10 -IR	110.1	6.54145	0.604857	108	0
003 30ms181012 BRCA2-Halo PCNA-iRFP IR tracking	WT G10 -IR	116.1	0.815767	0.306385	104	0
003 30ms181012 BRCA2-Halo PCNA-iRFP IR tracking	WT G10 -IR	119.1	0.812141	0.309303	117	0
003 30ms181012 BRCA2-Halo PCNA-iRFP IR tracking	WT G10 -IR	122.2	0.00143626	0.243042	133	2
003 30ms181012 BRCA2-Halo PCNA-iRFP IR tracking	WT G10 -IR	122.4	0.279851	0.000112648	160	0
003 30ms181012 BRCA2-Halo PCNA-iRFP IR tracking	WT G10 -IR	124.1	1.50134	0.423552	124	0
003 30ms181012 BRCA2-Halo PCNA-iRFP IR tracking	WT G10 -IR	125.3	0.0375521	0.0598743	86	1
003 30ms181012 BRCA2-Halo PCNA-iRFP IR tracking	WT G10 -IR	125.4	0.524793	0.636127	97	0
003 30ms181012 BRCA2-Halo PCNA-iRFP IR tracking	WT G10 -IR	125.5	0.148483	0.410214	109	1
003 30ms181012 BRCA2-Halo PCNA-iRFP IR tracking	WT G10 -IR	127.1	0.886703	0.323348	126	0
003 30ms181012 BRCA2-Halo PCNA-iRFP IR tracking	WT G10 -IR	129.11	0.498784	0.713998	66	0
003 30ms181012 BRCA2-Halo PCNA-iRFP IR tracking	WT G10 -IR	129.16	1.31003	0.0731627	119	2
003 30ms181012 BRCA2-Halo PCNA-iRFP IR tracking	WT G10 -IR	129.9	0.00253453	0.028997	52	2
003 30ms181012 BRCA2-Halo PCNA-iRFP IR tracking	WT G10 -IR	130.2	1.4044	0.247134	102	1
003 30ms181012 BRCA2-Halo PCNA-iRFP IR tracking	WT G10 -IR	133.3	1.09363	0.21043	137	0
003 30ms181012 BRCA2-Halo PCNA-iRFP IR tracking	WT G10 -IR	134.1	0.36459	0.115822	131	0
003 30ms181012 BRCA2-Halo PCNA-iRFP IR tracking	WT G10 -IR	135.1	2.98855	0.509573	132	0
003 30ms181012 BRCA2-Halo PCNA-iRFP IR tracking	WT G10 -IR	138.1	2.06907	0.474372	133	0
003 30ms181012 BRCA2-Halo PCNA-iRFP IR tracking	WT G10 -IR	141.2	0.157673	0.659147	135	1
003 30ms181012 BRCA2-Halo PCNA-iRFP IR tracking	WT G10 -IR	141.7	1.70462	0.691359	162	0
003 30ms181012 BRCA2-Halo PCNA-iRFP IR tracking	WT G10 -IR	145.2	0.00558241	0.243304	143	2
003 30ms181012 BRCA2-Halo PCNA-iRFP IR tracking	WT G10 -IR	152.1	1.0262	0.251506	162	0
003 30ms181012 BRCA2-Halo PCNA-iRFP IR tracking	WT G10 -IR	157.1	4.83318	0.543744	157	0
003 30ms181012 BRCA2-Halo PCNA-iRFP IR tracking	WT G10 -IR	166.2	0.0146121	0.162519	180	1
003 30ms181012 BRCA2-Halo PCNA-iRFP IR tracking	WT G10 -IR	168.1	0.921424	0.245516	175	0
003 30ms181012 BRCA2-Halo PCNA-iRFP IR tracking	WT G10 -IR	170.1	2.97936	0.691711	174	0
003 30ms181012 BRCA2-Halo PCNA-iRFP IR tracking	WT G10 -IR	170.2	0.0633303	0.193968	191	1
003 30ms181012 BRCA2-Halo PCNA-iRFP IR tracking	WT G10 -IR	176.1	1.00104	0.383578	182	0
003 30ms181012 BRCA2-Halo PCNA-iRFP IR tracking	WT G10 -IR	179.1	2.77212	0.406286	180	0
003 30ms181012 BRCA2-Halo PCNA-iRFP IR tracking	WT G10 -IR	181.1	0.0285996	0.224184	179	1
003 30ms181012 BRCA2-Halo PCNA-iRFP IR tracking	WT G10 -IR	184.1	1.11238	0.574299	186	0
003 30ms181012 BRCA2-Halo PCNA-iRFP IR tracking	WT G10 -IR	187.1	1.01058	0.152841	195	0
003 30ms181012 BRCA2-Halo PCNA-iRFP IR tracking	WT G10 -IR	187.5	2.90469	0.582081	227	0
003 30ms181012 BRCA2-Halo PCNA-iRFP IR tracking	WT G10 -IR	188.3	1.67086	0.446155	187	0
003 30ms181012 BRCA2-Halo PCNA-iRFP IR tracking	WT G10 -IR	189.3	1.74479	0.352074	192	0
003 30ms181012 BRCA2-Halo PCNA-iRFP IR tracking	WT G10 -IR	190.1	1.00432	0.496117	190	0
003 30ms181012 BRCA2-Halo PCNA-iRFP IR tracking	WT G10 -IR	195.1	1.19732	0.283809	195	0
003 30ms181012 BRCA2-Halo PCNA-iRFP IR tracking	WT G10 -IR	197.1	2.39845	0.424117	196	0
003 30ms181012 BRCA2-Halo PCNA-iRFP IR tracking	WT G10 -IR	200.1	0.382212	0.222222	206	0
003 30ms181012 BRCA2-Halo PCNA-iRFP IR tracking	WT G10 -IR	201.1	0.0571914	0.455057	145	1
003 30ms181012 BRCA2-Halo PCNA-iRFP IR tracking	WT G10 -IR	201.2	0.00426924	0.238097	193	2
003 30ms181012 BRCA2-Halo PCNA-iRFP IR tracking	WT G10 -IR	202.1	0.42228	0.180584	187	0
003 30ms181012 BRCA2-Halo PCNA-iRFP IR tracking	WT G10 -IR	203.1	0.746249	0.188331	204	0
003 30ms181012 BRCA2-Halo PCNA-iRFP IR tracking	WT G10 -IR	206.1	0.338887	0.115073	204	0
003 30ms181012 BRCA2-Halo PCNA-iRFP IR tracking	WT G10 -IR	212.1	0.12567	-0.16404	165	0
003 30ms181012 BRCA2-Halo PCNA-iRFP IR tracking	WT G10 -IR	212.11	0.0163336	0.442158	181	2
003 30ms181012 BRCA2-Halo PCNA-iRFP IR tracking	WT G10 -IR	212.13	0.0142707	0.146396	213	2
003 30ms181012 BRCA2-Halo PCNA-iRFP IR tracking	WT G10 -IR	212.6	0.00947448	0.384923	117	2
003 30ms181012 BRCA2-Halo PCNA-iRFP IR tracking	WT G10 -IR	212.7	0.0111783	0.195146	133	1
003 30ms181012 BRCA2-Halo PCNA-iRFP IR tracking	WT G10 -IR	212.8	0.00694779	0.268037	145	2
003 30ms181012 BRCA2-Halo PCNA-iRFP IR tracking	WT G10 -IR	214.1	1.64864	0.421649	202	0
003 30ms181012 BRCA2-Halo PCNA-iRFP IR tracking	WT G10 -IR	216.1	4.7192	0.610587	218	0
003 30ms181012 BRCA2-Halo PCNA-iRFP IR tracking	WT G10 -IR	217.1	0.00941229	0.178502	216	2
003 30ms181012 BRCA2-Halo PCNA-iRFP IR tracking	WT G10 -IR	220.1	1.37495	0.164472	220	0
003 30ms181012 BRCA2-Halo PCNA-iRFP IR tracking	WT G10 -IR	223.1	2.55283	0.323883	226	0
003 30ms181012 BRCA2-Halo PCNA-iRFP IR tracking	WT G10 -IR	230.1	0.681294	0.135913	198	0
003 30ms181012 BRCA2-Halo PCNA-iRFP IR tracking	WT G10 -IR	230.3	8.77541	0.702362	235	0
003 30ms181012 BRCA2-Halo PCNA-iRFP IR tracking	WT G10 -IR	231.1	2.17453	0.509768	237	0
003 30ms181012 BRCA2-Halo PCNA-iRFP IR tracking	WT G10 -IR	232.1	2.18986	0.408137	222	0
003 30ms181012 BRCA2-Halo PCNA-iRFP IR tracking	WT G10 -IR	237.1	0.0199851	0.193928	296	0
003 30ms181012 BRCA2-Halo PCNA-iRFP IR tracking	WT G10 -IR	239.2	0.0074619	0.442556	229	2
003 30ms181012 BRCA2-Halo PCNA-iRFP IR tracking	WT G10 -IR	241.1	0.239604	0.03692	249	0
003 30ms181012 BRCA2-Halo PCNA-iRFP IR tracking	WT G10 -IR	242.2	0.109619	0.244154	241	1
003 30ms181012 BRCA2-Halo PCNA-iRFP IR tracking	WT G10 -IR	247.1	1.6476	0.430254	254	0
003 30ms181012 BRCA2-Halo PCNA-iRFP IR tracking	WT G10 -IR	249.1	1.94781	0.529107	258	0
003 30ms181012 BRCA2-Halo PCNA-iRFP IR tracking	WT G10 -IR	251.1	7.10961	0.693154	271	0
003 30ms181012 BRCA2-Halo PCNA-iRFP IR tracking	WT G10 -IR	252.4	1.00662	0.131812	208	0
003 30ms181012 BRCA2-Halo PCNA-iRFP IR tracking	WT G10 -IR	252.6	1.32426	0.353271	234	0
003 30ms181012 BRCA2-Halo PCNA-iRFP IR tracking	WT G10 -IR	254.1	2.28527	0.64727	261	0
003 30ms181012 BRCA2-Halo PCNA-iRFP IR tracking	WT G10 -IR	261.1	0.579894	0.286748	267	0
003 30ms181012 BRCA2-Halo PCNA-iRFP IR tracking	WT G10 -IR	262.1	1.41805	0.344805	231	0
003 30ms181012 BRCA2-Halo PCNA-iRFP IR tracking	WT G10 -IR	269.1	0.00804379	0.313149	273	2
003 30ms181012 BRCA2-Halo PCNA-iRFP IR tracking	WT G10 -IR	272.1	0.603008	0.153399	296	0
003 30ms181012 BRCA2-Halo PCNA-iRFP IR tracking	WT G10 -IR	274.1	0.00045216	0.212317	295	2
003 30ms181012 BRCA2-Halo PCNA-iRFP IR tracking	WT G10 -IR	275.3	0.924347	0.0858778	291	0
003 30ms181012 BRCA2-Halo PCNA-iRFP IR tracking	WT G10 -IR	276.1	0.647262	0.0637153	298	0
003 30ms181012 BRCA2-Halo PCNA-iRFP IR tracking	WT G10 -IR	277.9	0.811607	0.0545574	305	0
003 30ms181012 BRCA2-Halo PCNA-iRFP IR tracking	WT G10 -IR	279.1	1.80901	0.388236	301	0
003 30ms181012 BRCA2-Halo PCNA-iRFP IR tracking	WT G10 -IR	281.1	2.00214	0.55612	307	0
003 30ms181012 BRCA2-Halo PCNA-iRFP IR tracking	WT G10 -IR	282.4	0.0774992	0.133064	315	1
003 30ms181012 BRCA2-Halo PCNA-iRFP IR tracking	WT G10 -IR	282.6	0.0506964	0.27103	332	1
003 30ms181012 BRCA2-Halo PCNA-iRFP IR tracking	WT G10 -IR	285.4	0.310754	0.253394	307	0
003 30ms181012 BRCA2-Halo PCNA-iRFP IR tracking	WT G10 -IR	286.3	0.142086	0.501039	306	1
003 30ms181012 BRCA2-Halo PCNA-iRFP IR tracking	WT G10 -IR	298.1	2.26055	0.275703	331	0
003 30ms181012 BRCA2-Halo PCNA-iRFP IR tracking	WT G10 -IR	301.5	3.65764	0.517914	330	0
003 30ms181012 BRCA2-Halo PCNA-iRFP IR tracking	WT G10 -IR	302.1	1.87588	0.260175	323	0
003 30ms181012 BRCA2-Halo PCNA-iRFP IR tracking	WT G10 -IR	304.1	1.08786	0.146512	339	0
003 30ms181012 BRCA2-Halo PCNA-iRFP IR tracking	WT G10 -IR	308.6	0.255292	0.354937	352	1
003 30ms181012 BRCA2-Halo PCNA-iRFP IR tracking	WT G10 -IR	309.1	0.947099	0.532674	292	0
003 30ms181012 BRCA2-Halo PCNA-iRFP IR tracking	WT G10 -IR	309.2	0.00112867	0.355337	307	2
003 30ms181012 BRCA2-Halo PCNA-iRFP IR tracking	WT G10 -IR	309.4	0.000498354	0.164556	334	2
003 30ms181012 BRCA2-Halo PCNA-iRFP IR tracking	WT G10 -IR	310.1	1.36188	0.211275	352	0
003 30ms181012 BRCA2-Halo PCNA-iRFP IR tracking	WT G10 -IR	312.4	3.31387	0.385402	342	0
003 30ms181012 BRCA2-Halo PCNA-iRFP IR tracking	WT G10 -IR	313.3	6.07505	0.61046	350	0
003 30ms181012 BRCA2-Halo PCNA-iRFP IR tracking	WT G10 -IR	319.1	0.602423	0.271997	353	0
003 30ms181012 BRCA2-Halo PCNA-iRFP IR tracking	WT G10 -IR	320.1	2.49492	0.681815	347	0
003 30ms181012 BRCA2-Halo PCNA-iRFP IR tracking	WT G10 -IR	327.3	0.126188	0.546813	225	1
003 30ms181012 BRCA2-Halo PCNA-iRFP IR tracking	WT G10 -IR	327.4	0.0131043	0.157009	258	2
003 30ms181012 BRCA2-Halo PCNA-iRFP IR tracking	WT G10 -IR	327.6	0.00882626	0.378344	276	2
003 30ms181012 BRCA2-Halo PCNA-iRFP IR tracking	WT G10 -IR	331.1	0.960798	0.407959	373	0
003 30ms181012 BRCA2-Halo PCNA-iRFP IR tracking	WT G10 -IR	332.1	1.04106	0.409482	381	0
003 30ms181012 BRCA2-Halo PCNA-iRFP IR tracking	WT G10 -IR	333.1	0.00600177	0.259117	318	2
003 30ms181012 BRCA2-Halo PCNA-iRFP IR tracking	WT G10 -IR	335.1	1.35987	0.30753	373	0
003 30ms181012 BRCA2-Halo PCNA-iRFP IR tracking	WT G10 -IR	336.2	0.00250478	0.0441119	370	2
003 30ms181012 BRCA2-Halo PCNA-iRFP IR tracking	WT G10 -IR	336.3	0.242539	0.666723	381	1
003 30ms181012 BRCA2-Halo PCNA-iRFP IR tracking	WT G10 -IR	336.5	0.113318	0.501079	397	1
003 30ms181012 BRCA2-Halo PCNA-iRFP IR tracking	WT G10 -IR	338.1	1.75148	0.322502	378	0
003 30ms181012 BRCA2-Halo PCNA-iRFP IR tracking	WT G10 -IR	341.3	0.896025	0.376855	397	0
003 30ms181012 BRCA2-Halo PCNA-iRFP IR tracking	WT G10 -IR	344.1	0.00217268	0.0444506	395	2
003 30ms181012 BRCA2-Halo PCNA-iRFP IR tracking	WT G10 -IR	348.1	0.216654	-0.0437476	382	0
003 30ms181012 BRCA2-Halo PCNA-iRFP IR tracking	WT G10 -IR	349.4	0.0239665	0.213874	357	1
003 30ms181012 BRCA2-Halo PCNA-iRFP IR tracking	WT G10 -IR	359.1	1.90892	0.316242	407	0
003 30ms181012 BRCA2-Halo PCNA-iRFP IR tracking	WT G10 -IR	360.1	0.637541	0.200121	404	0
003 30ms181012 BRCA2-Halo PCNA-iRFP IR tracking	WT G10 -IR	362.1	0.00193001	0.263084	341	2
003 30ms181012 BRCA2-Halo PCNA-iRFP IR tracking	WT G10 -IR	362.3	0.00712858	0.306382	368	2
003 30ms181012 BRCA2-Halo PCNA-iRFP IR tracking	WT G10 -IR	362.7	0.00563433	0.179608	407	2
003 30ms181012 BRCA2-Halo PCNA-iRFP IR tracking	WT G10 -IR	374.5	0.0113911	0.12709	413	1
003 30ms181012 BRCA2-Halo PCNA-iRFP IR tracking	WT G10 -IR	377.1	8.35912	0.697429	442	0
003 30ms181012 BRCA2-Halo PCNA-iRFP IR tracking	WT G10 -IR	378.13	0.00574821	0.119906	412	1
003 30ms181012 BRCA2-Halo PCNA-iRFP IR tracking	WT G10 -IR	378.14	0.00750448	-0.0182291	426	2
003 30ms181012 BRCA2-Halo PCNA-iRFP IR tracking	WT G10 -IR	378.9	0.00157275	0.0773146	361	2
003 30ms181012 BRCA2-Halo PCNA-iRFP IR tracking	WT G10 -IR	383.3	1.12811	0.337671	456	0
003 30ms181012 BRCA2-Halo PCNA-iRFP IR tracking	WT G10 -IR	384.2	0.0812889	0.487889	415	1
003 30ms181012 BRCA2-Halo PCNA-iRFP IR tracking	WT G10 -IR	384.4	0.0620302	0.333065	440	1
003 30ms181012 BRCA2-Halo PCNA-iRFP IR tracking	WT G10 -IR	385.1	2.136	0.325906	438	0
003 30ms181012 BRCA2-Halo PCNA-iRFP IR tracking	WT G10 -IR	385.3	0.469342	0.0364227	456	0
003 30ms181012 BRCA2-Halo PCNA-iRFP IR tracking	WT G10 -IR	386.1	5.06373	0.574228	458	0
003 30ms181012 BRCA2-Halo PCNA-iRFP IR tracking	WT G10 -IR	389.1	0.475352	0.100369	464	0
003 30ms181012 BRCA2-Halo PCNA-iRFP IR tracking	WT G10 -IR	391.1	1.64828	0.416667	472	0
003 30ms181012 BRCA2-Halo PCNA-iRFP IR tracking	WT G10 -IR	392.1	0.976409	0.20848	466	0
003 30ms181012 BRCA2-Halo PCNA-iRFP IR tracking	WT G10 -IR	394.1	0.182499	0.0575739	490	0
003 30ms181012 BRCA2-Halo PCNA-iRFP IR tracking	WT G10 -IR	394.3	3.20429	0.565297	512	0
003 30ms181012 BRCA2-Halo PCNA-iRFP IR tracking	WT G10 -IR	396.1	4.39812	0.621858	488	0
003 30ms181012 BRCA2-Halo PCNA-iRFP IR tracking	WT G10 -IR	398.1	0.115338	0.131195	493	0
003 30ms181012 BRCA2-Halo PCNA-iRFP IR tracking	WT G10 -IR	401.1	1.9121	0.409501	496	0
003 30ms181012 BRCA2-Halo PCNA-iRFP IR tracking	WT G10 -IR	407.1	1.79868	0.336026	492	0
003 30ms181012 BRCA2-Halo PCNA-iRFP IR tracking	WT G10 -IR	415.2	0.00246748	0.243486	486	2
003 30ms181012 BRCA2-Halo PCNA-iRFP IR tracking	WT G10 -IR	415.5	0.0617903	0.270372	523	1
003 30ms181012 BRCA2-Halo PCNA-iRFP IR tracking	WT G10 -IR	417.1	0.956749	0.250317	525	0
003 30ms181012 BRCA2-Halo PCNA-iRFP IR tracking	WT G10 -IR	418.2	0.204569	0.577499	528	1
003 30ms181012 BRCA2-Halo PCNA-iRFP IR tracking	WT G10 -IR	420.1	1.65466	0.347319	526	0
003 30ms181012 BRCA2-Halo PCNA-iRFP IR tracking	WT G10 -IR	425.4	0.00149291	0.0438797	472	2
003 30ms181012 BRCA2-Halo PCNA-iRFP IR tracking	WT G10 -IR	428.1	0.25037	0.389915	545	1
003 30ms181012 BRCA2-Halo PCNA-iRFP IR tracking	WT G10 -IR	428.3	0.246214	0.412923	514	1
003 30ms181012 BRCA2-Halo PCNA-iRFP IR tracking	WT G10 -IR	430.1	2.15628	0.265438	562	0
003 30ms181012 BRCA2-Halo PCNA-iRFP IR tracking	WT G10 -IR	435.1	0.385423	-0.0160893	567	0
003 30ms181012 BRCA2-Halo PCNA-iRFP IR tracking	WT G10 -IR	437.1	1.28462	0.225849	572	0
003 30ms181012 BRCA2-Halo PCNA-iRFP IR tracking	WT G10 -IR	438.1	3.24643	0.477516	570	0
003 30ms181012 BRCA2-Halo PCNA-iRFP IR tracking	WT G10 -IR	439.2	0.558413	-0.0135026	584	0
003 30ms181012 BRCA2-Halo PCNA-iRFP IR tracking	WT G10 -IR	439.4	2.11067	0.584669	599	0
003 30ms181012 BRCA2-Halo PCNA-iRFP IR tracking	WT G10 -IR	440.1	1.95351	0.384752	568	0
003 30ms181012 BRCA2-Halo PCNA-iRFP IR tracking	WT G10 -IR	444.6	1.91941	0.331187	559	0
003 30ms181012 BRCA2-Halo PCNA-iRFP IR tracking	WT G10 -IR	457.1	2.07154	0.386863	599	0
003 30ms181012 BRCA2-Halo PCNA-iRFP IR tracking	WT G10 -IR	460.1	0.563812	0.475629	597	0
003 30ms181012 BRCA2-Halo PCNA-iRFP IR tracking	WT G10 -IR	461.3	1.35826	0.349766	609	0
003 30ms181012 BRCA2-Halo PCNA-iRFP IR tracking	WT G10 -IR	463.1	0.638964	-0.0572765	620	0
003 30ms181012 BRCA2-Halo PCNA-iRFP IR tracking	WT G10 -IR	467.1	0.575734	0.105409	622	0
003 30ms181012 BRCA2-Halo PCNA-iRFP IR tracking	WT G10 -IR	472.1	0.508671	0.273843	619	0
003 30ms181012 BRCA2-Halo PCNA-iRFP IR tracking	WT G10 -IR	474.4	0.788824	0.581875	631	0
003 30ms181012 BRCA2-Halo PCNA-iRFP IR tracking	WT G10 -IR	475.2	0.0551455	0.271766	600	1
003 30ms181012 BRCA2-Halo PCNA-iRFP IR tracking	WT G10 -IR	475.5	1.13932	0.583832	618	0
003 30ms181012 BRCA2-Halo PCNA-iRFP IR tracking	WT G10 -IR	479.1	0.691314	0.0923754	641	0
003 30ms181012 BRCA2-Halo PCNA-iRFP IR tracking	WT G10 -IR	480.1	0.442636	-0.0159766	643	0
003 30ms181012 BRCA2-Halo PCNA-iRFP IR tracking	WT G10 -IR	487.1	5.80389	0.750528	688	0
003 30ms181012 BRCA2-Halo PCNA-iRFP IR tracking	WT G10 -IR	488.3	0.595376	0.242571	669	0
003 30ms181012 BRCA2-Halo PCNA-iRFP IR tracking	WT G10 -IR	489.1	0.267968	-0.0362718	696	0
003 30ms181012 BRCA2-Halo PCNA-iRFP IR tracking	WT G10 -IR	489.3	3.6539	0.521251	720	0
003 30ms181012 BRCA2-Halo PCNA-iRFP IR tracking	WT G10 -IR	492.3	0.6287	0.0838485	701	0
003 30ms181012 BRCA2-Halo PCNA-iRFP IR tracking	WT G10 -IR	492.4	0.0347949	0.206422	715	1
003 30ms181012 BRCA2-Halo PCNA-iRFP IR tracking	WT G10 -IR	493.1	0.0911847	0.308744	706	1
003 30ms181012 BRCA2-Halo PCNA-iRFP IR tracking	WT G10 -IR	501.1	0.589458	0.392222	730	0
003 30ms181012 BRCA2-Halo PCNA-iRFP IR tracking	WT G10 -IR	503.1	0.692682	0.452766	701	0
003 30ms181012 BRCA2-Halo PCNA-iRFP IR tracking	WT G10 -IR	503.3	0.95815	0.566553	733	0
003 30ms181012 BRCA2-Halo PCNA-iRFP IR tracking	WT G10 -IR	504.1	1.50994	0.597302	754	0
003 30ms181012 BRCA2-Halo PCNA-iRFP IR tracking	WT G10 -IR	505.1	1.02723	0.225505	752	0
003 30ms181012 BRCA2-Halo PCNA-iRFP IR tracking	WT G10 -IR	508.1	0.379312	0.178596	771	0
003 30ms181012 BRCA2-Halo PCNA-iRFP IR tracking	WT G10 -IR	509.1	1.21001	0.52473	779	0
003 30ms181012 BRCA2-Halo PCNA-iRFP IR tracking	WT G10 -IR	515.3	0.200988	0.617099	754	1
003 30ms181012 BRCA2-Halo PCNA-iRFP IR tracking	WT G10 -IR	515.7	0.194609	0.398592	787	1
003 30ms181012 BRCA2-Halo PCNA-iRFP IR tracking	WT G10 -IR	521.1	0.828432	0.249761	772	0
003 30ms181012 BRCA2-Halo PCNA-iRFP IR tracking	WT G10 -IR	521.2	0.00522789	0.317217	787	2
003 30ms181012 BRCA2-Halo PCNA-iRFP IR tracking	WT G10 -IR	521.8	0.0138848	0.416961	808	2
003 30ms181012 BRCA2-Halo PCNA-iRFP IR tracking	WT G10 -IR	527.1	1.6884	0.0971845	843	0
003 30ms181012 BRCA2-Halo PCNA-iRFP IR tracking	WT G10 -IR	528.3	0.00352204	0.227619	840	2
003 30ms181012 BRCA2-Halo PCNA-iRFP IR tracking	WT G10 -IR	535.2	0.120673	0.4276	857	1
003 30ms181012 BRCA2-Halo PCNA-iRFP IR tracking	WT G10 -IR	535.4	0.131	0.231907	884	1
003 30ms181012 BRCA2-Halo PCNA-iRFP IR tracking	WT G10 -IR	537.1	1.09895	0.419066	877	0
003 30ms181012 BRCA2-Halo PCNA-iRFP IR tracking	WT G10 -IR	538.1	0.00437785	0.158435	863	2
003 30ms181012 BRCA2-Halo PCNA-iRFP IR tracking	WT G10 -IR	538.2	0.00760358	-0.0202865	890	1
003 30ms181012 BRCA2-Halo PCNA-iRFP IR tracking	WT G10 -IR	538.3	0.00274716	0.216576	904	2
003 30ms181012 BRCA2-Halo PCNA-iRFP IR tracking	WT G10 -IR	539.1	0.0576493	0.646831	906	1
003 30ms181012 BRCA2-Halo PCNA-iRFP IR tracking	WT G10 -IR	539.3	0.0357891	0.419059	919	1
003 30ms181012 BRCA2-Halo PCNA-iRFP IR tracking	WT G10 -IR	548.1	0.598371	0.387861	992	0
003 30ms181012 BRCA2-Halo PCNA-iRFP IR tracking	WT G10 -IR	554.1	1.63538	0.467803	1019	0
003 30ms181012 BRCA2-Halo PCNA-iRFP IR tracking	WT G10 -IR	560.1	2.05319	0.382441	1045	0
003 30ms181012 BRCA2-Halo PCNA-iRFP IR tracking	WT G10 -IR	564.1	0.883237	0.0258572	1077	0
003 30ms181012 BRCA2-Halo PCNA-iRFP IR tracking	WT G10 -IR	564.2	0.219902	0.419876	1090	1
003 30ms181012 BRCA2-Halo PCNA-iRFP IR tracking	WT G10 -IR	568.1	0.0049091	0.183836	1011	2
003 30ms181012 BRCA2-Halo PCNA-iRFP IR tracking	WT G10 -IR	568.3	0.000973555	0.102555	1057	2
003 30ms181012 BRCA2-Halo PCNA-iRFP IR tracking	WT G10 -IR	570.1	2.55394	0.587671	1118	0
003 30ms181012 BRCA2-Halo PCNA-iRFP IR tracking	WT G10 -IR	578.1	2.08875	0.199286	1139	0
003 30ms181012 BRCA2-Halo PCNA-iRFP IR tracking	WT G10 -IR	579.1	1.02473	0.287153	1133	0
003 30ms181012 BRCA2-Halo PCNA-iRFP IR tracking	WT G10 -IR	580.1	0.977864	0.20108	1142	0
003 30ms181012 BRCA2-Halo PCNA-iRFP IR tracking	WT G10 -IR	582.1	0.232487	-0.0757145	1144	0
003 30ms181012 BRCA2-Halo PCNA-iRFP IR tracking	WT G10 -IR	582.2	0.14146	0.5082	1155	1
003 30ms181012 BRCA2-Halo PCNA-iRFP IR tracking	WT G10 -IR	584.1	1.15956	0.591213	1162	0
003 30ms181012 BRCA2-Halo PCNA-iRFP IR tracking	WT G10 -IR	584.3	3.05005	0.420196	1190	0
003 30ms181012 BRCA2-Halo PCNA-iRFP IR tracking	WT G10 -IR	586.1	0.136286	0.128544	1169	0
003 30ms181012 BRCA2-Halo PCNA-iRFP IR tracking	WT G10 -IR	587.2	0.0765134	0.340885	1140	1
003 30ms181012 BRCA2-Halo PCNA-iRFP IR tracking	WT G10 -IR	587.4	0.0553914	0.391449	1183	1
003 30ms181012 BRCA2-Halo PCNA-iRFP IR tracking	WT G10 -IR	590.1	0.497757	0.215469	1210	0
003 30ms181012 BRCA2-Halo PCNA-iRFP IR tracking	WT G10 -IR	591.1	1.26078	0.704744	1267	0
003 30ms181012 BRCA2-Halo PCNA-iRFP IR tracking	WT G10 -IR	592.3	2.45855	0.412318	1271	0
003 30ms181012 BRCA2-Halo PCNA-iRFP IR tracking	WT G10 -IR	593.5	0.576697	0.467284	1256	0
003 30ms181012 BRCA2-Halo PCNA-iRFP IR tracking	WT G10 -IR	595.1	0.879946	0.369251	1258	0
003 30ms181012 BRCA2-Halo PCNA-iRFP IR tracking	WT G10 -IR	595.4	0.271264	0.54101	1281	1
003 30ms181012 BRCA2-Halo PCNA-iRFP IR tracking	WT G10 -IR	597.1	0.00112123	0.180584	1247	2
003 30ms181012 BRCA2-Halo PCNA-iRFP IR tracking	WT G10 -IR	600.2	0.00192694	0.0467981	1211	2
003 30ms181012 BRCA2-Halo PCNA-iRFP IR tracking	WT G10 -IR	600.3	2.49201	0.411759	1245	0
003 30ms181012 BRCA2-Halo PCNA-iRFP IR tracking	WT G10 -IR	600.4	0.000210211	-0.0235047	1261	2
003 30ms181012 BRCA2-Halo PCNA-iRFP IR tracking	WT G10 -IR	605.1	0.457915	0.223136	1340	0
003 30ms181012 BRCA2-Halo PCNA-iRFP IR tracking	WT G10 -IR	606.1	0.0194998	0.196063	1344	1
003 30ms181012 BRCA2-Halo PCNA-iRFP IR tracking	WT G10 -IR	607.1	1.35534	0.372409	1357	0
003 30ms181012 BRCA2-Halo PCNA-iRFP IR tracking	WT G10 -IR	610.1	1.97588	0.385398	1390	0
003 30ms181012 BRCA2-Halo PCNA-iRFP IR tracking	WT G10 -IR	613.1	1.29702	0.269509	1418	0
003 30ms181012 BRCA2-Halo PCNA-iRFP IR tracking	WT G10 -IR	614.1	0.952478	0.179859	1430	0
003 30ms181012 BRCA2-Halo PCNA-iRFP IR tracking	WT G10 -IR	617.1	0.686924	0.13612	1446	0
003 30ms181012 BRCA2-Halo PCNA-iRFP IR tracking	WT G10 -IR	621.3	0.831989	0.679726	1467	0
003 30ms181012 BRCA2-Halo PCNA-iRFP IR tracking	WT G10 -IR	624.4	0.591221	0.445721	1512	0
003 30ms181012 BRCA2-Halo PCNA-iRFP IR tracking	WT G10 -IR	625.1	1.09113	0.443763	1489	0
003 30ms181012 BRCA2-Halo PCNA-iRFP IR tracking	WT G10 -IR	625.3	2.35154	0.520085	1513	0
003 30ms181012 BRCA2-Halo PCNA-iRFP IR tracking	WT G10 -IR	633.4	1.40059	0.216585	1552	0
003 30ms181012 BRCA2-Halo PCNA-iRFP IR tracking	WT G10 -IR	635.1	0.00813016	0.0816803	1502	1
003 30ms181012 BRCA2-Halo PCNA-iRFP IR tracking	WT G10 -IR	635.4	0.0189847	0.452131	1526	2
003 30ms181012 BRCA2-Halo PCNA-iRFP IR tracking	WT G10 -IR	635.5	0.0060516	0.275232	1544	1
003 30ms181012 BRCA2-Halo PCNA-iRFP IR tracking	WT G10 -IR	637.1	0.506681	0.26859	1566	0
003 30ms181012 BRCA2-Halo PCNA-iRFP IR tracking	WT G10 -IR	639.1	2.16359	0.6726	1585	0
003 30ms181012 BRCA2-Halo PCNA-iRFP IR tracking	WT G10 -IR	641.1	1.90921	0.250176	1600	0
003 30ms181012 BRCA2-Halo PCNA-iRFP IR tracking	WT G10 -IR	643.4	0.00197867	0.0313287	1612	2
003 30ms181012 BRCA2-Halo PCNA-iRFP IR tracking	WT G10 -IR	645.4	0.022707	0.316275	1579	1
003 30ms181012 BRCA2-Halo PCNA-iRFP IR tracking	WT G10 -IR	645.5	0.00906388	0.365434	1602	2
003 30ms181012 BRCA2-Halo PCNA-iRFP IR tracking	WT G10 -IR	650.1	0.980715	0.529084	1660	0
003 30ms181012 BRCA2-Halo PCNA-iRFP IR tracking	WT G10 -IR	654.1	0.359247	0.163258	1684	0
003 30ms181012 BRCA2-Halo PCNA-iRFP IR tracking	WT G10 -IR	656.2	3.84724	0.632363	1700	0
003 30ms181012 BRCA2-Halo PCNA-iRFP IR tracking	WT G10 -IR	658.4	0.0652267	0.326506	1696	1
003 30ms181012 BRCA2-Halo PCNA-iRFP IR tracking	WT G10 -IR	659.2	0.149782	0.505028	1697	1
003 30ms181012 BRCA2-Halo PCNA-iRFP IR tracking	WT G10 -IR	659.4	0.0116931	0.385568	1717	1
003 30ms181012 BRCA2-Halo PCNA-iRFP IR tracking	WT G10 -IR	661.1	1.97052	0.611403	1743	0
003 30ms181012 BRCA2-Halo PCNA-iRFP IR tracking	WT G10 -IR	667.2	0.650588	0.211706	1777	0
003 30ms181012 BRCA2-Halo PCNA-iRFP IR tracking	WT G10 -IR	671.1	2.07445	0.399313	1805	0
003 30ms181012 BRCA2-Halo PCNA-iRFP IR tracking	WT G10 -IR	676.3	1.02398	0.549288	1833	0
003 30ms181012 BRCA2-Halo PCNA-iRFP IR tracking	WT G10 -IR	678.1	0.751321	0.100816	1850	0
003 30ms181012 BRCA2-Halo PCNA-iRFP IR tracking	WT G10 -IR	679.3	0.00583343	0.129306	1843	2
003 30ms181012 BRCA2-Halo PCNA-iRFP IR tracking	WT G10 -IR	685.1	0.205498	0.183045	1882	0
003 30ms181012 BRCA2-Halo PCNA-iRFP IR tracking	WT G10 -IR	685.3	0.866709	0.649547	1903	0
003 30ms181012 BRCA2-Halo PCNA-iRFP IR tracking	WT G10 -IR	685.5	0.920528	0.406002	1920	0
003 30ms181012 BRCA2-Halo PCNA-iRFP IR tracking	WT G10 -IR	686.1	1.39386	0.487151	1882	0
003 30ms181012 BRCA2-Halo PCNA-iRFP IR tracking	WT G10 -IR	691.2	0.000358672	-0.0859717	1879	2
003 30ms181012 BRCA2-Halo PCNA-iRFP IR tracking	WT G10 -IR	692.1	1.49734	0.76621	1929	0
003 30ms181012 BRCA2-Halo PCNA-iRFP IR tracking	WT G10 -IR	693.2	0.00198197	0.130397	1891	2
003 30ms181012 BRCA2-Halo PCNA-iRFP IR tracking	WT G10 -IR	694.1	3.3197	0.41451	1943	0
003 30ms181012 BRCA2-Halo PCNA-iRFP IR tracking	WT G10 -IR	701.1	0.00433567	0.120496	1980	2
003 30ms181012 BRCA2-Halo PCNA-iRFP IR tracking	WT G10 -IR	702.4	0.10813	0.653035	1948	1
004 30ms181005 BRCA2-Halo PCNA-iRFP IR tracking	WT G10 -IR	1.2	0.0647938	0.527062	2	1
004 30ms181005 BRCA2-Halo PCNA-iRFP IR tracking	WT G10 -IR	4.1	3.92141	0.52064	10	0
004 30ms181005 BRCA2-Halo PCNA-iRFP IR tracking	WT G10 -IR	6.1	0.00401887	0.256667	0	2
004 30ms181005 BRCA2-Halo PCNA-iRFP IR tracking	WT G10 -IR	8.1	1.65251	0.61036	7	0
004 30ms181005 BRCA2-Halo PCNA-iRFP IR tracking	WT G10 -IR	12.1	0.00128229	0.204222	3	2
004 30ms181005 BRCA2-Halo PCNA-iRFP IR tracking	WT G10 -IR	16.1	0.0068375	0.233401	0	2
004 30ms181005 BRCA2-Halo PCNA-iRFP IR tracking	WT G10 -IR	20.1	0.000724082	0.183855	0	2
004 30ms181005 BRCA2-Halo PCNA-iRFP IR tracking	WT G10 -IR	20.3	0.00174023	-0.0748357	12	2
004 30ms181005 BRCA2-Halo PCNA-iRFP IR tracking	WT G10 -IR	24.1	0.153762	0.174613	43	0
004 30ms181005 BRCA2-Halo PCNA-iRFP IR tracking	WT G10 -IR	25.1	2.08211	0.542613	40	0
004 30ms181005 BRCA2-Halo PCNA-iRFP IR tracking	WT G10 -IR	28.3	0.0160152	0.241821	35	1
004 30ms181005 BRCA2-Halo PCNA-iRFP IR tracking	WT G10 -IR	28.7	0.0450141	0.442299	54	1
004 30ms181005 BRCA2-Halo PCNA-iRFP IR tracking	WT G10 -IR	30.3	0.0577606	0.459801	49	1
004 30ms181005 BRCA2-Halo PCNA-iRFP IR tracking	WT G10 -IR	30.5	0.0863824	0.276293	65	1
004 30ms181005 BRCA2-Halo PCNA-iRFP IR tracking	WT G10 -IR	32.9	0.0115184	0.439644	46	2
004 30ms181005 BRCA2-Halo PCNA-iRFP IR tracking	WT G10 -IR	36.2	0.101055	0.239397	110	0
004 30ms181005 BRCA2-Halo PCNA-iRFP IR tracking	WT G10 -IR	37.1	0.661811	0.452575	106	0
004 30ms181005 BRCA2-Halo PCNA-iRFP IR tracking	WT G10 -IR	38.1	0.0023183	0.367009	0	2
004 30ms181005 BRCA2-Halo PCNA-iRFP IR tracking	WT G10 -IR	40.1	0.00030656	0.0808445	109	2
004 30ms181005 BRCA2-Halo PCNA-iRFP IR tracking	WT G10 -IR	45.11	0.0914816	0.475096	134	1
004 30ms181005 BRCA2-Halo PCNA-iRFP IR tracking	WT G10 -IR	47.1	0.00657282	0.0438886	144	2
004 30ms181005 BRCA2-Halo PCNA-iRFP IR tracking	WT G10 -IR	49.2	0.00160662	-0.0426057	162	2
004 30ms181005 BRCA2-Halo PCNA-iRFP IR tracking	WT G10 -IR	49.4	0.00438823	0.0577876	191	2
004 30ms181005 BRCA2-Halo PCNA-iRFP IR tracking	WT G10 -IR	51.1	0.142957	0.209747	165	1
004 30ms181005 BRCA2-Halo PCNA-iRFP IR tracking	WT G10 -IR	52.1	0.00305725	0.16489	162	2
004 30ms181005 BRCA2-Halo PCNA-iRFP IR tracking	WT G10 -IR	52.3	0.000842976	0.0968367	187	2
004 30ms181005 BRCA2-Halo PCNA-iRFP IR tracking	WT G10 -IR	55.11	0.174731	0.565629	219	1
004 30ms181005 BRCA2-Halo PCNA-iRFP IR tracking	WT G10 -IR	56.4	0.34694	0.561605	175	1
004 30ms181005 BRCA2-Halo PCNA-iRFP IR tracking	WT G10 -IR	59.1	1.12535	0.552908	177	0
004 30ms181005 BRCA2-Halo PCNA-iRFP IR tracking	WT G10 -IR	70.1	0.00411217	0.452403	201	2
004 30ms181005 BRCA2-Halo PCNA-iRFP IR tracking	WT G10 -IR	72.3	0.000732851	0.0353501	181	2
004 30ms181005 BRCA2-Halo PCNA-iRFP IR tracking	WT G10 -IR	73.1	0.00199708	0.0358209	210	2
004 30ms181005 BRCA2-Halo PCNA-iRFP IR tracking	WT G10 -IR	75.18	0.00771556	0.360939	276	2
004 30ms181005 BRCA2-Halo PCNA-iRFP IR tracking	WT G10 -IR	75.7	0.155961	0.300855	233	0
004 30ms181005 BRCA2-Halo PCNA-iRFP IR tracking	WT G10 -IR	76.1	0.613445	0.454581	230	2
004 30ms181005 BRCA2-Halo PCNA-iRFP IR tracking	WT G10 -IR	76.2	0.201843	0.477132	242	1
004 30ms181005 BRCA2-Halo PCNA-iRFP IR tracking	WT G10 -IR	76.4	0.11178	0.37922	262	1
004 30ms181005 BRCA2-Halo PCNA-iRFP IR tracking	WT G10 -IR	78.2	0.144089	0.396093	206	1
004 30ms181005 BRCA2-Halo PCNA-iRFP IR tracking	WT G10 -IR	78.4	0.0967799	0.275874	222	1
004 30ms181005 BRCA2-Halo PCNA-iRFP IR tracking	WT G10 -IR	82.4	2.19892	0.410344	245	0
004 30ms181005 BRCA2-Halo PCNA-iRFP IR tracking	WT G10 -IR	83.2	0.0612471	0.467918	244	1
004 30ms181005 BRCA2-Halo PCNA-iRFP IR tracking	WT G10 -IR	84.2	0.0372813	0.275765	246	1
004 30ms181005 BRCA2-Halo PCNA-iRFP IR tracking	WT G10 -IR	86.3	0.00287382	0.189279	203	2
004 30ms181005 BRCA2-Halo PCNA-iRFP IR tracking	WT G10 -IR	86.7	0.00536354	0.365846	224	2
004 30ms181005 BRCA2-Halo PCNA-iRFP IR tracking	WT G10 -IR	86.8	0.128639	0.620937	244	1
004 30ms181005 BRCA2-Halo PCNA-iRFP IR tracking	WT G10 -IR	94.1	1.26967	0.387487	268	0
004 30ms181005 BRCA2-Halo PCNA-iRFP IR tracking	WT G10 -IR	95.1	0.000976947	0.129339	245	2
004 30ms181005 BRCA2-Halo PCNA-iRFP IR tracking	WT G10 -IR	95.4	0.295774	0.613932	315	1
004 30ms181005 BRCA2-Halo PCNA-iRFP IR tracking	WT G10 -IR	95.9	0.171207	0.534497	348	1
004 30ms181005 BRCA2-Halo PCNA-iRFP IR tracking	WT G10 -IR	102.5	1.21957	0.191061	247	0
004 30ms181005 BRCA2-Halo PCNA-iRFP IR tracking	WT G10 -IR	102.6	0.0224368	0.243168	259	1
004 30ms181005 BRCA2-Halo PCNA-iRFP IR tracking	WT G10 -IR	102.7	0.00376583	0.204282	271	2
004 30ms181005 BRCA2-Halo PCNA-iRFP IR tracking	WT G10 -IR	105.5	1.118	0.487701	301	0
004 30ms181005 BRCA2-Halo PCNA-iRFP IR tracking	WT G10 -IR	106.1	0.000697978	0.0259468	284	2
004 30ms181005 BRCA2-Halo PCNA-iRFP IR tracking	WT G10 -IR	110.1	0.00588968	0.23801	288	2
004 30ms181005 BRCA2-Halo PCNA-iRFP IR tracking	WT G10 -IR	114.1	0.116958	0.538097	307	1
004 30ms181005 BRCA2-Halo PCNA-iRFP IR tracking	WT G10 -IR	114.1	0.0687579	0.359997	394	1
004 30ms181005 BRCA2-Halo PCNA-iRFP IR tracking	WT G10 -IR	114.5	0.0723304	0.293222	344	1
004 30ms181005 BRCA2-Halo PCNA-iRFP IR tracking	WT G10 -IR	114.7	0.00928873	0.26803	361	2
004 30ms181005 BRCA2-Halo PCNA-iRFP IR tracking	WT G10 -IR	114.8	0.135099	0.437479	379	1
004 30ms181005 BRCA2-Halo PCNA-iRFP IR tracking	WT G10 -IR	121.6	0.00116316	0.176575	339	2
004 30ms181005 BRCA2-Halo PCNA-iRFP IR tracking	WT G10 -IR	121.7	0.07146	0.38178	361	1
004 30ms181005 BRCA2-Halo PCNA-iRFP IR tracking	WT G10 -IR	125.1	0.215276	0.21315	286	0
004 30ms181005 BRCA2-Halo PCNA-iRFP IR tracking	WT G10 -IR	125.4	6.03153e-05	-0.104712	307	2
004 30ms181005 BRCA2-Halo PCNA-iRFP IR tracking	WT G10 -IR	125.8	0.00618834	0.190809	325	2
004 30ms181005 BRCA2-Halo PCNA-iRFP IR tracking	WT G10 -IR	128.3	0.00243039	0.0649622	357	1
004 30ms181005 BRCA2-Halo PCNA-iRFP IR tracking	WT G10 -IR	128.4	0.173991	0.214962	373	0
004 30ms181005 BRCA2-Halo PCNA-iRFP IR tracking	WT G10 -IR	130.11	0.0156972	0.348411	274	1
004 30ms181005 BRCA2-Halo PCNA-iRFP IR tracking	WT G10 -IR	130.12	0.0919686	0.56731	286	2
004 30ms181005 BRCA2-Halo PCNA-iRFP IR tracking	WT G10 -IR	130.13	0.0205799	0.0832221	305	1
004 30ms181005 BRCA2-Halo PCNA-iRFP IR tracking	WT G10 -IR	130.15	0.0719519	0.381313	319	1
004 30ms181005 BRCA2-Halo PCNA-iRFP IR tracking	WT G10 -IR	130.2	0.227991	0.438003	203	1
004 30ms181005 BRCA2-Halo PCNA-iRFP IR tracking	WT G10 -IR	130.3	0.785458	0.619244	215	0
004 30ms181005 BRCA2-Halo PCNA-iRFP IR tracking	WT G10 -IR	130.4	0.101007	0.45594	230	1
004 30ms181005 BRCA2-Halo PCNA-iRFP IR tracking	WT G10 -IR	135.2	0.11017	0.331828	290	1
004 30ms181005 BRCA2-Halo PCNA-iRFP IR tracking	WT G10 -IR	135.5	1.05435	0.0640476	318	0
004 30ms181005 BRCA2-Halo PCNA-iRFP IR tracking	WT G10 -IR	135.7	0.590989	0.192023	336	0
004 30ms181005 BRCA2-Halo PCNA-iRFP IR tracking	WT G10 -IR	141.1	1.76396	0.45235	363	0
004 30ms181005 BRCA2-Halo PCNA-iRFP IR tracking	WT G10 -IR	143.11	0.369107	0.140069	297	0
004 30ms181005 BRCA2-Halo PCNA-iRFP IR tracking	WT G10 -IR	143.15	0.206194	-0.0698259	332	2
004 30ms181005 BRCA2-Halo PCNA-iRFP IR tracking	WT G10 -IR	143.17	0.00251797	0.103655	349	2
004 30ms181005 BRCA2-Halo PCNA-iRFP IR tracking	WT G10 -IR	143.19	0.000454618	0.0534448	373	1
004 30ms181005 BRCA2-Halo PCNA-iRFP IR tracking	WT G10 -IR	143.22	0.0538225	0.17762	394	2
004 30ms181005 BRCA2-Halo PCNA-iRFP IR tracking	WT G10 -IR	143.9	0.000166125	0.00983123	277	2
004 30ms181005 BRCA2-Halo PCNA-iRFP IR tracking	WT G10 -IR	144.2	0.00423092	-0.123019	371	2
004 30ms181005 BRCA2-Halo PCNA-iRFP IR tracking	WT G10 -IR	144.3	0.154786	0.540857	390	1
004 30ms181005 BRCA2-Halo PCNA-iRFP IR tracking	WT G10 -IR	146.1	0.00142527	-0.0300761	361	2
004 30ms181005 BRCA2-Halo PCNA-iRFP IR tracking	WT G10 -IR	150.7	0.00222132	0.159711	347	2
004 30ms181005 BRCA2-Halo PCNA-iRFP IR tracking	WT G10 -IR	153.1	0.244065	-0.161835	385	0
004 30ms181005 BRCA2-Halo PCNA-iRFP IR tracking	WT G10 -IR	159.2	0.0664674	0.50485	421	1
004 30ms181005 BRCA2-Halo PCNA-iRFP IR tracking	WT G10 -IR	159.4	0.00178852	0.132064	447	2
004 30ms181005 BRCA2-Halo PCNA-iRFP IR tracking	WT G10 -IR	161.1	0.617546	0.266521	418	0
004 30ms181005 BRCA2-Halo PCNA-iRFP IR tracking	WT G10 -IR	162.1	0.000328441	0.116826	400	2
004 30ms181005 BRCA2-Halo PCNA-iRFP IR tracking	WT G10 -IR	166.1	0.967908	0.59523	424	0
004 30ms181005 BRCA2-Halo PCNA-iRFP IR tracking	WT G10 -IR	171.1	0.00141483	0.0910998	324	2
004 30ms181005 BRCA2-Halo PCNA-iRFP IR tracking	WT G10 -IR	172.1	1.33781	0.13957	420	0
004 30ms181005 BRCA2-Halo PCNA-iRFP IR tracking	WT G10 -IR	173.2	0.0394377	0.101638	424	1
004 30ms181005 BRCA2-Halo PCNA-iRFP IR tracking	WT G10 -IR	173.4	0.000549966	0.214182	439	2
004 30ms181005 BRCA2-Halo PCNA-iRFP IR tracking	WT G10 -IR	177.1	0.00399266	0.220163	429	2
004 30ms181005 BRCA2-Halo PCNA-iRFP IR tracking	WT G10 -IR	182.3	0.816769	0.512167	456	0
004 30ms181005 BRCA2-Halo PCNA-iRFP IR tracking	WT G10 -IR	183.4	0.00141681	0.0977582	490	2
004 30ms181005 BRCA2-Halo PCNA-iRFP IR tracking	WT G10 -IR	184.1	0.46097	0.178101	469	0
004 30ms181005 BRCA2-Halo PCNA-iRFP IR tracking	WT G10 -IR	201.2	0.197022	0.5891	518	1
004 30ms181005 BRCA2-Halo PCNA-iRFP IR tracking	WT G10 -IR	203.13	0.010695	0.541187	655	2
004 30ms181005 BRCA2-Halo PCNA-iRFP IR tracking	WT G10 -IR	203.2	0.0148031	0.428551	534	2
004 30ms181005 BRCA2-Halo PCNA-iRFP IR tracking	WT G10 -IR	203.3	0.126687	0.446425	550	1
004 30ms181005 BRCA2-Halo PCNA-iRFP IR tracking	WT G10 -IR	203.5	0.138282	0.555912	587	1
004 30ms181005 BRCA2-Halo PCNA-iRFP IR tracking	WT G10 -IR	203.7	0.184763	0.65856	622	1
004 30ms181005 BRCA2-Halo PCNA-iRFP IR tracking	WT G10 -IR	204.1	0.245431	-0.0455783	517	2
004 30ms181005 BRCA2-Halo PCNA-iRFP IR tracking	WT G10 -IR	204.4	0.0896195	0.0915036	534	1
004 30ms181005 BRCA2-Halo PCNA-iRFP IR tracking	WT G10 -IR	205.5	0.00401699	0.227071	499	2
004 30ms181005 BRCA2-Halo PCNA-iRFP IR tracking	WT G10 -IR	205.7	0.0302857	0.689311	518	2
004 30ms181005 BRCA2-Halo PCNA-iRFP IR tracking	WT G10 -IR	205.8	0.0362819	0.226583	531	1
004 30ms181005 BRCA2-Halo PCNA-iRFP IR tracking	WT G10 -IR	206.1	0.251164	0.207787	496	0
004 30ms181005 BRCA2-Halo PCNA-iRFP IR tracking	WT G10 -IR	208.3	0.386775	0.423349	562	0
004 30ms181005 BRCA2-Halo PCNA-iRFP IR tracking	WT G10 -IR	212.4	0.0506682	0.287188	568	1
004 30ms181005 BRCA2-Halo PCNA-iRFP IR tracking	WT G10 -IR	213.6	0.165238	0.18503	557	1
004 30ms181005 BRCA2-Halo PCNA-iRFP IR tracking	WT G10 -IR	215.1	0.238166	0.0557974	577	0
004 30ms181005 BRCA2-Halo PCNA-iRFP IR tracking	WT G10 -IR	216.3	0.00520164	0.252758	573	2
004 30ms181005 BRCA2-Halo PCNA-iRFP IR tracking	WT G10 -IR	220.14	0.00507657	0.173816	680	2
004 30ms181005 BRCA2-Halo PCNA-iRFP IR tracking	WT G10 -IR	220.4	0.000426693	0.0555967	611	1
004 30ms181005 BRCA2-Halo PCNA-iRFP IR tracking	WT G10 -IR	221.1	0.424614	0.255008	606	1
004 30ms181005 BRCA2-Halo PCNA-iRFP IR tracking	WT G10 -IR	222.2	0.111951	0.160991	603	0
004 30ms181005 BRCA2-Halo PCNA-iRFP IR tracking	WT G10 -IR	223.4	0.193887	0.413262	609	1
004 30ms181005 BRCA2-Halo PCNA-iRFP IR tracking	WT G10 -IR	224.1	0.155823	0.423361	620	1
004 30ms181005 BRCA2-Halo PCNA-iRFP IR tracking	WT G10 -IR	224.14	0.182617	0.584467	703	1
004 30ms181005 BRCA2-Halo PCNA-iRFP IR tracking	WT G10 -IR	224.16	0.0219181	0.300727	717	2
004 30ms181005 BRCA2-Halo PCNA-iRFP IR tracking	WT G10 -IR	224.17	0.250206	0.606882	729	1
004 30ms181005 BRCA2-Halo PCNA-iRFP IR tracking	WT G10 -IR	224.25	0.516178	0.0571586	804	1
004 30ms181005 BRCA2-Halo PCNA-iRFP IR tracking	WT G10 -IR	224.9	0.175333	0.453698	649	1
004 30ms181005 BRCA2-Halo PCNA-iRFP IR tracking	WT G10 -IR	226.1	0.160641	-0.00661985	619	2
004 30ms181005 BRCA2-Halo PCNA-iRFP IR tracking	WT G10 -IR	227.1	0.591367	0.362985	610	0
004 30ms181005 BRCA2-Halo PCNA-iRFP IR tracking	WT G10 -IR	228.1	1.16204	0.303443	618	0
004 30ms181005 BRCA2-Halo PCNA-iRFP IR tracking	WT G10 -IR	229.3	0.326906	0.578605	605	0
004 30ms181005 BRCA2-Halo PCNA-iRFP IR tracking	WT G10 -IR	233.1	2.48642	0.596706	633	0
004 30ms181005 BRCA2-Halo PCNA-iRFP IR tracking	WT G10 -IR	234.2	0.0535341	0.0605396	614	0
004 30ms181005 BRCA2-Halo PCNA-iRFP IR tracking	WT G10 -IR	234.3	0.0513292	0.150179	628	1
004 30ms181005 BRCA2-Halo PCNA-iRFP IR tracking	WT G10 -IR	235.1	0.354917	0.314787	637	0
004 30ms181005 BRCA2-Halo PCNA-iRFP IR tracking	WT G10 -IR	235.2	0.156853	0.350422	657	1
004 30ms181005 BRCA2-Halo PCNA-iRFP IR tracking	WT G10 -IR	235.3	0.819879	0.381378	676	0
004 30ms181005 BRCA2-Halo PCNA-iRFP IR tracking	WT G10 -IR	235.4	0.00185181	0.273439	689	2
004 30ms181005 BRCA2-Halo PCNA-iRFP IR tracking	WT G10 -IR	236.1	0.330771	0.579414	593	1
004 30ms181005 BRCA2-Halo PCNA-iRFP IR tracking	WT G10 -IR	236.17	0.350343	0.756255	641	1
004 30ms181005 BRCA2-Halo PCNA-iRFP IR tracking	WT G10 -IR	236.2	0.252843	0.71634	557	1
004 30ms181005 BRCA2-Halo PCNA-iRFP IR tracking	WT G10 -IR	236.4	0.121819	0.361654	571	1
004 30ms181005 BRCA2-Halo PCNA-iRFP IR tracking	WT G10 -IR	243.1	0.0057221	0.186346	568	2
004 30ms181005 BRCA2-Halo PCNA-iRFP IR tracking	WT G10 -IR	243.3	0.00447955	0.10686	597	2
004 30ms181005 BRCA2-Halo PCNA-iRFP IR tracking	WT G10 -IR	256.3	0.256838	0.607481	699	1
004 30ms181005 BRCA2-Halo PCNA-iRFP IR tracking	WT G10 -IR	257.4	0.00592898	0.297397	709	2
004 30ms181005 BRCA2-Halo PCNA-iRFP IR tracking	WT G10 -IR	258.1	0.0245656	0.282279	718	1
004 30ms181005 BRCA2-Halo PCNA-iRFP IR tracking	WT G10 -IR	259.1	0.00995537	0.365549	720	2
004 30ms181005 BRCA2-Halo PCNA-iRFP IR tracking	WT G10 -IR	260.5	0.242215	0.54427	710	1
004 30ms181005 BRCA2-Halo PCNA-iRFP IR tracking	WT G10 -IR	267.4	0.230878	0.67327	734	1
004 30ms181005 BRCA2-Halo PCNA-iRFP IR tracking	WT G10 -IR	271.2	0.00606276	0.183862	763	2
004 30ms181005 BRCA2-Halo PCNA-iRFP IR tracking	WT G10 -IR	275.6	0.121251	0.442579	739	1
004 30ms181005 BRCA2-Halo PCNA-iRFP IR tracking	WT G10 -IR	277.1	0.731939	0.432365	809	0
004 30ms181005 BRCA2-Halo PCNA-iRFP IR tracking	WT G10 -IR	277.16	0.00767512	0.354332	921	2
004 30ms181005 BRCA2-Halo PCNA-iRFP IR tracking	WT G10 -IR	277.2	0.220812	0.523904	824	1
004 30ms181005 BRCA2-Halo PCNA-iRFP IR tracking	WT G10 -IR	277.3	0.527654	0.421606	844	0
004 30ms181005 BRCA2-Halo PCNA-iRFP IR tracking	WT G10 -IR	277.4	0.116979	0.461365	857	1
004 30ms181005 BRCA2-Halo PCNA-iRFP IR tracking	WT G10 -IR	287.4	0.00820782	0.0830253	853	1
004 30ms181005 BRCA2-Halo PCNA-iRFP IR tracking	WT G10 -IR	288.1	0.00902708	0.288211	823	2
004 30ms181005 BRCA2-Halo PCNA-iRFP IR tracking	WT G10 -IR	288.2	0.0175842	0.307618	850	1
004 30ms181005 BRCA2-Halo PCNA-iRFP IR tracking	WT G10 -IR	290.2	3.34873e-05	-0.0107821	712	2
004 30ms181005 BRCA2-Halo PCNA-iRFP IR tracking	WT G10 -IR	290.6	0.0131637	0.291653	844	2
004 30ms181005 BRCA2-Halo PCNA-iRFP IR tracking	WT G10 -IR	293.1	0.000939715	0.137838	815	2
004 30ms181005 BRCA2-Halo PCNA-iRFP IR tracking	WT G10 -IR	295.1	0.00134393	0.0995301	764	2
004 30ms181005 BRCA2-Halo PCNA-iRFP IR tracking	WT G10 -IR	296.1	0.0014592	0.0750998	861	2
004 30ms181005 BRCA2-Halo PCNA-iRFP IR tracking	WT G10 -IR	297.2	0.0150128	0.336041	876	2
004 30ms181005 BRCA2-Halo PCNA-iRFP IR tracking	WT G10 -IR	298.1	0.209462	0.63737	825	1
004 30ms181005 BRCA2-Halo PCNA-iRFP IR tracking	WT G10 -IR	298.3	0.0254921	0.482322	846	1
004 30ms181005 BRCA2-Halo PCNA-iRFP IR tracking	WT G10 -IR	301.1	1.09301	0.586734	892	0
004 30ms181005 BRCA2-Halo PCNA-iRFP IR tracking	WT G10 -IR	304.1	0.00169186	0.0953441	833	2
004 30ms181005 BRCA2-Halo PCNA-iRFP IR tracking	WT G10 -IR	306.2	0.0751906	0.27295	866	1
004 30ms181005 BRCA2-Halo PCNA-iRFP IR tracking	WT G10 -IR	306.8	0.0948543	0.323604	889	1
004 30ms181005 BRCA2-Halo PCNA-iRFP IR tracking	WT G10 -IR	308.1	2.69832	0.450712	940	0
004 30ms181005 BRCA2-Halo PCNA-iRFP IR tracking	WT G10 -IR	308.4	0.00192375	0.0364717	959	2
004 30ms181005 BRCA2-Halo PCNA-iRFP IR tracking	WT G10 -IR	309.3	0.907584	0.583836	914	0
004 30ms181005 BRCA2-Halo PCNA-iRFP IR tracking	WT G10 -IR	309.4	0.000611159	0.0338073	952	1
004 30ms181005 BRCA2-Halo PCNA-iRFP IR tracking	WT G10 -IR	310.4	0.0238771	0.186901	927	1
004 30ms181005 BRCA2-Halo PCNA-iRFP IR tracking	WT G10 -IR	314.1	0.000929733	0.0544456	954	2
004 30ms181005 BRCA2-Halo PCNA-iRFP IR tracking	WT G10 -IR	314.5	0.00225537	0.160923	989	2
004 30ms181005 BRCA2-Halo PCNA-iRFP IR tracking	WT G10 -IR	315.1	0.543063	0.493876	965	0
004 30ms181005 BRCA2-Halo PCNA-iRFP IR tracking	WT G10 -IR	316.1	0.00120644	0.0475112	922	2
004 30ms181005 BRCA2-Halo PCNA-iRFP IR tracking	WT G10 -IR	319.1	0.527713	0.381552	976	0
004 30ms181005 BRCA2-Halo PCNA-iRFP IR tracking	WT G10 -IR	321.1	0.783574	0.0996204	992	0
004 30ms181005 BRCA2-Halo PCNA-iRFP IR tracking	WT G10 -IR	322.4	0.00385625	0.176911	982	2
004 30ms181005 BRCA2-Halo PCNA-iRFP IR tracking	WT G10 -IR	322.6	0.000909037	0.171044	997	2
004 30ms181005 BRCA2-Halo PCNA-iRFP IR tracking	WT G10 -IR	323.5	0.00452138	0.273065	992	2
004 30ms181005 BRCA2-Halo PCNA-iRFP IR tracking	WT G10 -IR	324.1	0.00192263	-0.0115783	998	2
004 30ms181005 BRCA2-Halo PCNA-iRFP IR tracking	WT G10 -IR	326.3	1.22983	0.768232	1022	0
004 30ms181005 BRCA2-Halo PCNA-iRFP IR tracking	WT G10 -IR	327.1	0.0459188	0.366513	992	1
004 30ms181005 BRCA2-Halo PCNA-iRFP IR tracking	WT G10 -IR	327.3	0.0311783	0.412351	1016	1
004 30ms181005 BRCA2-Halo PCNA-iRFP IR tracking	WT G10 -IR	332.2	0.91802	0.516695	991	0
004 30ms181005 BRCA2-Halo PCNA-iRFP IR tracking	WT G10 -IR	332.4	1.31346	0.589532	1006	0
004 30ms181005 BRCA2-Halo PCNA-iRFP IR tracking	WT G10 -IR	334.1	0.00296672	0.18908	994	2
004 30ms181005 BRCA2-Halo PCNA-iRFP IR tracking	WT G10 -IR	336.3	1.01482	0.594988	1041	0
004 30ms181005 BRCA2-Halo PCNA-iRFP IR tracking	WT G10 -IR	337.1	0.00283954	0.0389619	1059	1
004 30ms181005 BRCA2-Halo PCNA-iRFP IR tracking	WT G10 -IR	340.1	0.00438444	0.0738933	978	2
004 30ms181005 BRCA2-Halo PCNA-iRFP IR tracking	WT G10 -IR	340.5	0.00497125	0.179991	998	2
004 30ms181005 BRCA2-Halo PCNA-iRFP IR tracking	WT G10 -IR	340.7	0.00429998	0.270479	1054	2
004 30ms181005 BRCA2-Halo PCNA-iRFP IR tracking	WT G10 -IR	343.2	0.00155153	0.245998	1004	2
004 30ms181005 BRCA2-Halo PCNA-iRFP IR tracking	WT G10 -IR	344.1	0.000959831	0.143113	1060	2
004 30ms181005 BRCA2-Halo PCNA-iRFP IR tracking	WT G10 -IR	344.3	0.00344431	0.0485375	1073	2
004 30ms181005 BRCA2-Halo PCNA-iRFP IR tracking	WT G10 -IR	347.3	0.000339103	0.289846	1079	1
004 30ms181005 BRCA2-Halo PCNA-iRFP IR tracking	WT G10 -IR	347.5	0.00668051	0.168182	1095	2
004 30ms181005 BRCA2-Halo PCNA-iRFP IR tracking	WT G10 -IR	347.8	0.0016461	0.161152	1121	2
004 30ms181005 BRCA2-Halo PCNA-iRFP IR tracking	WT G10 -IR	352.1	0.144708	0.246874	1151	1
004 30ms181005 BRCA2-Halo PCNA-iRFP IR tracking	WT G10 -IR	353.11	0.719819	0.603171	1188	1
004 30ms181005 BRCA2-Halo PCNA-iRFP IR tracking	WT G10 -IR	353.12	1.04188	0.543153	1205	0
004 30ms181005 BRCA2-Halo PCNA-iRFP IR tracking	WT G10 -IR	353.13	1.10503	0.559817	1221	2
004 30ms181005 BRCA2-Halo PCNA-iRFP IR tracking	WT G10 -IR	353.8	1.41385	0.488793	1161	0
004 30ms181005 BRCA2-Halo PCNA-iRFP IR tracking	WT G10 -IR	354.6	0.00856673	0.212318	1160	0
004 30ms181005 BRCA2-Halo PCNA-iRFP IR tracking	WT G10 -IR	355.1	0.000636481	-0.262284	1191	2
004 30ms181005 BRCA2-Halo PCNA-iRFP IR tracking	WT G10 -IR	362.11	0.201495	0.510097	1266	1
004 30ms181005 BRCA2-Halo PCNA-iRFP IR tracking	WT G10 -IR	365.2	0.480078	0.745464	1247	1
004 30ms181005 BRCA2-Halo PCNA-iRFP IR tracking	WT G10 -IR	366.1	0.00128265	-0.0894872	1246	2
004 30ms181005 BRCA2-Halo PCNA-iRFP IR tracking	WT G10 -IR	366.3	0.00718259	0.29621	1259	2
004 30ms181005 BRCA2-Halo PCNA-iRFP IR tracking	WT G10 -IR	367.3	0.0476201	0.268108	1242	1
004 30ms181005 BRCA2-Halo PCNA-iRFP IR tracking	WT G10 -IR	368.5	0.133419	0.434617	1280	1
004 30ms181005 BRCA2-Halo PCNA-iRFP IR tracking	WT G10 -IR	369.2	0.641503	0.551255	1225	0
004 30ms181005 BRCA2-Halo PCNA-iRFP IR tracking	WT G10 -IR	369.3	0.198948	0.553667	1244	1
004 30ms181005 BRCA2-Halo PCNA-iRFP IR tracking	WT G10 -IR	369.5	0.0181933	0.238791	1263	1
004 30ms181005 BRCA2-Halo PCNA-iRFP IR tracking	WT G10 -IR	372.5	1.07282	0.533164	1295	0
004 30ms181005 BRCA2-Halo PCNA-iRFP IR tracking	WT G10 -IR	372.7	1.28285	0.337512	1317	0
004 30ms181005 BRCA2-Halo PCNA-iRFP IR tracking	WT G10 -IR	373.4	0.00997166	0.136252	1322	1
004 30ms181005 BRCA2-Halo PCNA-iRFP IR tracking	WT G10 -IR	374.1	0.00182811	0.032087	1315	2
004 30ms181005 BRCA2-Halo PCNA-iRFP IR tracking	WT G10 -IR	375.1	0.00108223	0.0737017	1302	2
004 30ms181005 BRCA2-Halo PCNA-iRFP IR tracking	WT G10 -IR	377.1	0.000575809	0.0181764	1348	2
004 30ms181005 BRCA2-Halo PCNA-iRFP IR tracking	WT G10 -IR	378.1	0.00166428	0.163209	1328	2
004 30ms181005 BRCA2-Halo PCNA-iRFP IR tracking	WT G10 -IR	388.4	0.893162	0.476345	1450	0
004 30ms181005 BRCA2-Halo PCNA-iRFP IR tracking	WT G10 -IR	389.1	1.27311	0.265078	1451	0
004 30ms181005 BRCA2-Halo PCNA-iRFP IR tracking	WT G10 -IR	390.2	0.00220676	0.110831	1424	2
004 30ms181005 BRCA2-Halo PCNA-iRFP IR tracking	WT G10 -IR	391.4	0.0747765	0.294055	1457	1
004 30ms181005 BRCA2-Halo PCNA-iRFP IR tracking	WT G10 -IR	392.2	0.0974373	0.437956	1446	1
004 30ms181005 BRCA2-Halo PCNA-iRFP IR tracking	WT G10 -IR	395.1	0.00542803	0.327624	1453	2
004 30ms181005 BRCA2-Halo PCNA-iRFP IR tracking	WT G10 -IR	396.3	0.744421	0.567119	1498	0
004 30ms181005 BRCA2-Halo PCNA-iRFP IR tracking	WT G10 -IR	397.1	0.00122903	0.046507	1496	2
004 30ms181005 BRCA2-Halo PCNA-iRFP IR tracking	WT G10 -IR	397.3	0.000808866	0.167888	1545	2
004 30ms181005 BRCA2-Halo PCNA-iRFP IR tracking	WT G10 -IR	398.1	0.00141493	0.176068	1441	2
004 30ms181005 BRCA2-Halo PCNA-iRFP IR tracking	WT G10 -IR	398.5	0.0020296	0.0983867	1514	2
004 30ms181005 BRCA2-Halo PCNA-iRFP IR tracking	WT G10 -IR	400.1	0.000194978	0.00999781	1535	2
004 30ms181005 BRCA2-Halo PCNA-iRFP IR tracking	WT G10 -IR	408.4	0.00276347	0.118563	1598	2
004 30ms181005 BRCA2-Halo PCNA-iRFP IR tracking	WT G10 -IR	408.5	0.00507156	0.146869	1624	1
004 30ms181005 BRCA2-Halo PCNA-iRFP IR tracking	WT G10 -IR	410.1	0.00336916	0.217927	1601	2
004 30ms181005 BRCA2-Halo PCNA-iRFP IR tracking	WT G10 -IR	410.5	0.00225619	0.279908	1620	2
004 30ms181005 BRCA2-Halo PCNA-iRFP IR tracking	WT G10 -IR	411.5	0.635775	0.0102343	1628	0
004 30ms181005 BRCA2-Halo PCNA-iRFP IR tracking	WT G10 -IR	418.1	0.00135813	0.110752	1621	2
004 30ms181005 BRCA2-Halo PCNA-iRFP IR tracking	WT G10 -IR	418.5	0.00138595	-0.0108981	1676	2
004 30ms181005 BRCA2-Halo PCNA-iRFP IR tracking	WT G10 -IR	419.1	0.00143106	0.142158	1556	2
004 30ms181005 BRCA2-Halo PCNA-iRFP IR tracking	WT G10 -IR	420.4	0.00506531	0.202615	1712	2
004 30ms181005 BRCA2-Halo PCNA-iRFP IR tracking	WT G10 -IR	420.6	0.00583422	0.225605	1754	2
004 30ms181005 BRCA2-Halo PCNA-iRFP IR tracking	WT G10 -IR	421.4	0.0330341	0.568922	1706	1
004 30ms181005 BRCA2-Halo PCNA-iRFP IR tracking	WT G10 -IR	422.5	0.0207561	0.2614	1711	1
004 30ms181005 BRCA2-Halo PCNA-iRFP IR tracking	WT G10 -IR	430.2	1.95592	0.714854	1825	0
004 30ms181005 BRCA2-Halo PCNA-iRFP IR tracking	WT G10 -IR	431.1	0.00370085	0.208052	1782	2
004 30ms181005 BRCA2-Halo PCNA-iRFP IR tracking	WT G10 -IR	434.11	0.279054	0.335231	1885	0
004 30ms181005 BRCA2-Halo PCNA-iRFP IR tracking	WT G10 -IR	440.12	0.0118581	0.0482626	1981	2
004 30ms181005 BRCA2-Halo PCNA-iRFP IR tracking	WT G10 -IR	440.4	0.468241	0.646353	1944	1
004 30ms181005 BRCA2-Halo PCNA-iRFP IR tracking	WT G10 -IR	441.1	0.00207672	0.14865	1919	2
004 30ms181005 BRCA2-Halo PCNA-iRFP IR tracking	WT G10 -IR	441.3	0.000557939	0.0771541	1952	2
004 30ms181005 BRCA2-Halo PCNA-iRFP IR tracking	WT G10 -IR	443.1	0.73007	0.363944	1942	0
004 30ms181005 BRCA2-Halo PCNA-iRFP IR tracking	WT G10 -IR	444.1	0.600148	0.483494	1970	0
004 30ms181005 BRCA2-Halo PCNA-iRFP IR tracking	WT G10 -IR	445.1	0.217539	0.165185	1973	0
004 30ms181012 BRCA2-Halo PCNA-iRFP IR tracking	WT G10 -IR	4.3	0.16065	0.436493	3	1
004 30ms181012 BRCA2-Halo PCNA-iRFP IR tracking	WT G10 -IR	8.1	0.728547	0.116333	10	0
004 30ms181012 BRCA2-Halo PCNA-iRFP IR tracking	WT G10 -IR	9.1	0.438044	0.459745	12	0
004 30ms181012 BRCA2-Halo PCNA-iRFP IR tracking	WT G10 -IR	11.2	0.00443789	0.0658002	1	2
004 30ms181012 BRCA2-Halo PCNA-iRFP IR tracking	WT G10 -IR	17.1	1.05031	0.202115	17	0
004 30ms181012 BRCA2-Halo PCNA-iRFP IR tracking	WT G10 -IR	18.7	0.531995	0.0833844	26	0
004 30ms181012 BRCA2-Halo PCNA-iRFP IR tracking	WT G10 -IR	20.1	0.00234802	0.256666	24	2
004 30ms181012 BRCA2-Halo PCNA-iRFP IR tracking	WT G10 -IR	21.6	0.000608059	0.200149	61	2
004 30ms181012 BRCA2-Halo PCNA-iRFP IR tracking	WT G10 -IR	28.1	0.367288	0.063561	34	0
004 30ms181012 BRCA2-Halo PCNA-iRFP IR tracking	WT G10 -IR	30.4	0.00402255	0.157043	23	2
004 30ms181012 BRCA2-Halo PCNA-iRFP IR tracking	WT G10 -IR	31.1	0.000765517	0.120941	38	2
004 30ms181012 BRCA2-Halo PCNA-iRFP IR tracking	WT G10 -IR	31.4	0.00792537	0.382191	3	2
004 30ms181012 BRCA2-Halo PCNA-iRFP IR tracking	WT G10 -IR	37.1	0.00322662	0.198843	0	2
004 30ms181012 BRCA2-Halo PCNA-iRFP IR tracking	WT G10 -IR	47.1	0.764237	0.441487	68	0
004 30ms181012 BRCA2-Halo PCNA-iRFP IR tracking	WT G10 -IR	50.1	1.38976	0.290053	78	0
004 30ms181012 BRCA2-Halo PCNA-iRFP IR tracking	WT G10 -IR	52.1	0.000445276	0.0945122	16	2
004 30ms181012 BRCA2-Halo PCNA-iRFP IR tracking	WT G10 -IR	53.1	2.18902	0.348351	57	0
004 30ms181012 BRCA2-Halo PCNA-iRFP IR tracking	WT G10 -IR	55.7	0.0105099	0.276751	36	2
004 30ms181012 BRCA2-Halo PCNA-iRFP IR tracking	WT G10 -IR	55.9	0.00507963	0.158117	63	2
004 30ms181012 BRCA2-Halo PCNA-iRFP IR tracking	WT G10 -IR	59.3	0.0043	0.0983473	83	2
004 30ms181012 BRCA2-Halo PCNA-iRFP IR tracking	WT G10 -IR	59.5	0.00345343	0.102576	103	2
004 30ms181012 BRCA2-Halo PCNA-iRFP IR tracking	WT G10 -IR	65.3	2.51227	0.472648	69	0
004 30ms181012 BRCA2-Halo PCNA-iRFP IR tracking	WT G10 -IR	65.4	0.0207088	0.154618	82	1
004 30ms181012 BRCA2-Halo PCNA-iRFP IR tracking	WT G10 -IR	70.3	0.00171242	0.105096	58	2
004 30ms181012 BRCA2-Halo PCNA-iRFP IR tracking	WT G10 -IR	74.1	0.00558732	0.239513	113	2
004 30ms181012 BRCA2-Halo PCNA-iRFP IR tracking	WT G10 -IR	75.1	0.00134603	0.076294	93	2
004 30ms181012 BRCA2-Halo PCNA-iRFP IR tracking	WT G10 -IR	77.2	0.0186626	0.381904	114	2
004 30ms181012 BRCA2-Halo PCNA-iRFP IR tracking	WT G10 -IR	81.1	0.000961493	0.127778	38	2
004 30ms181012 BRCA2-Halo PCNA-iRFP IR tracking	WT G10 -IR	87.5	0.0107093	0.0317259	6	1
004 30ms181012 BRCA2-Halo PCNA-iRFP IR tracking	WT G10 -IR	87.9	0.000425724	0.0681336	39	2
004 30ms181012 BRCA2-Halo PCNA-iRFP IR tracking	WT G10 -IR	95.2	0.000305183	0.0695584	75	2
004 30ms181012 BRCA2-Halo PCNA-iRFP IR tracking	WT G10 -IR	100.1	0.733465	0.151492	27	0
004 30ms181012 BRCA2-Halo PCNA-iRFP IR tracking	WT G10 -IR	100.12	0.000783023	0.0372407	177	2
004 30ms181012 BRCA2-Halo PCNA-iRFP IR tracking	WT G10 -IR	100.5	0.00941576	0.42266	45	2
004 30ms181012 BRCA2-Halo PCNA-iRFP IR tracking	WT G10 -IR	100.9	0.00606745	0.211401	85	2
004 30ms181012 BRCA2-Halo PCNA-iRFP IR tracking	WT G10 -IR	102.1	0.218904	0.130913	111	0
004 30ms181012 BRCA2-Halo PCNA-iRFP IR tracking	WT G10 -IR	102.3	0.533291	0.0892209	134	0
004 30ms181012 BRCA2-Halo PCNA-iRFP IR tracking	WT G10 -IR	105.1	0.00735985	0.277865	129	2
004 30ms181012 BRCA2-Halo PCNA-iRFP IR tracking	WT G10 -IR	107.1	0.00110654	0.156379	85	2
004 30ms181012 BRCA2-Halo PCNA-iRFP IR tracking	WT G10 -IR	110.1	2.27248	0.354846	178	0
004 30ms181012 BRCA2-Halo PCNA-iRFP IR tracking	WT G10 -IR	121.2	0.00391558	0.280138	203	2
004 30ms181012 BRCA2-Halo PCNA-iRFP IR tracking	WT G10 -IR	122.1	0.00643	0.225568	204	2
004 30ms181012 BRCA2-Halo PCNA-iRFP IR tracking	WT G10 -IR	123.3	0.0449568	0.418579	202	1
004 30ms181012 BRCA2-Halo PCNA-iRFP IR tracking	WT G10 -IR	126.1	2.68273	0.394461	222	0
004 30ms181012 BRCA2-Halo PCNA-iRFP IR tracking	WT G10 -IR	129.2	0.00136163	-0.0660685	198	2
004 30ms181012 BRCA2-Halo PCNA-iRFP IR tracking	WT G10 -IR	129.4	0.00760195	0.17361	238	2
004 30ms181012 BRCA2-Halo PCNA-iRFP IR tracking	WT G10 -IR	130.1	0.00115355	0.0300268	201	2
004 30ms181012 BRCA2-Halo PCNA-iRFP IR tracking	WT G10 -IR	131.1	2.37412	0.465237	239	0
004 30ms181012 BRCA2-Halo PCNA-iRFP IR tracking	WT G10 -IR	134.5	0.000534518	0.0512052	186	2
004 30ms181012 BRCA2-Halo PCNA-iRFP IR tracking	WT G10 -IR	135.6	0.00435714	0.122868	245	2
004 30ms181012 BRCA2-Halo PCNA-iRFP IR tracking	WT G10 -IR	136.2	0.000843104	0.0194481	131	2
004 30ms181012 BRCA2-Halo PCNA-iRFP IR tracking	WT G10 -IR	137.15	0.0024874	-0.0183082	209	2
004 30ms181012 BRCA2-Halo PCNA-iRFP IR tracking	WT G10 -IR	140.1	1.11714	0.607283	231	0
004 30ms181012 BRCA2-Halo PCNA-iRFP IR tracking	WT G10 -IR	141.7	0.00117433	-0.12664	290	2
004 30ms181012 BRCA2-Halo PCNA-iRFP IR tracking	WT G10 -IR	145.1	0.00507479	0.298149	200	2
004 30ms181012 BRCA2-Halo PCNA-iRFP IR tracking	WT G10 -IR	148.1	1.53603	0.276395	268	0
004 30ms181012 BRCA2-Halo PCNA-iRFP IR tracking	WT G10 -IR	151.2	0.00171787	0.0654951	266	2
004 30ms181012 BRCA2-Halo PCNA-iRFP IR tracking	WT G10 -IR	155.1	1.8959	0.407104	320	0
004 30ms181012 BRCA2-Halo PCNA-iRFP IR tracking	WT G10 -IR	159.1	0.24513	0.720754	308	1
004 30ms181012 BRCA2-Halo PCNA-iRFP IR tracking	WT G10 -IR	161.1	0.00166706	0.160706	262	2
004 30ms181012 BRCA2-Halo PCNA-iRFP IR tracking	WT G10 -IR	163.1	0.0615407	0.517254	338	1
004 30ms181012 BRCA2-Halo PCNA-iRFP IR tracking	WT G10 -IR	168.2	0.0072112	0.246653	325	2
004 30ms181012 BRCA2-Halo PCNA-iRFP IR tracking	WT G10 -IR	168.3	0.0115367	0.25987	352	1
004 30ms181012 BRCA2-Halo PCNA-iRFP IR tracking	WT G10 -IR	169.4	0.00113187	0.126879	389	2
004 30ms181012 BRCA2-Halo PCNA-iRFP IR tracking	WT G10 -IR	170.4	0.188617	0.430264	358	1
004 30ms181012 BRCA2-Halo PCNA-iRFP IR tracking	WT G10 -IR	170.6	0.180398	0.573191	381	1
004 30ms181012 BRCA2-Halo PCNA-iRFP IR tracking	WT G10 -IR	170.7	0.382468	0.177976	393	0
004 30ms181012 BRCA2-Halo PCNA-iRFP IR tracking	WT G10 -IR	171.1	0.00328287	0.23064	403	2
004 30ms181012 BRCA2-Halo PCNA-iRFP IR tracking	WT G10 -IR	172.1	0.0778894	-0.0365242	412	1
004 30ms181012 BRCA2-Halo PCNA-iRFP IR tracking	WT G10 -IR	173.1	0.00163265	0.274613	339	2
004 30ms181012 BRCA2-Halo PCNA-iRFP IR tracking	WT G10 -IR	173.14	0.000537969	0.033114	455	2
004 30ms181012 BRCA2-Halo PCNA-iRFP IR tracking	WT G10 -IR	173.16	0.000366091	0.0787681	498	2
004 30ms181012 BRCA2-Halo PCNA-iRFP IR tracking	WT G10 -IR	173.5	0.000637647	0.0828764	384	2
004 30ms181012 BRCA2-Halo PCNA-iRFP IR tracking	WT G10 -IR	173.9	3.17538e-05	-0.0105183	429	2
004 30ms181012 BRCA2-Halo PCNA-iRFP IR tracking	WT G10 -IR	176.2	0.00149661	0.106709	444	2
004 30ms181012 BRCA2-Halo PCNA-iRFP IR tracking	WT G10 -IR	178.1	0.000267953	0.0314865	434	2
004 30ms181012 BRCA2-Halo PCNA-iRFP IR tracking	WT G10 -IR	178.3	0.000964223	0.216441	458	2
004 30ms181012 BRCA2-Halo PCNA-iRFP IR tracking	WT G10 -IR	185.4	0.00198044	0.352536	429	2
004 30ms181012 BRCA2-Halo PCNA-iRFP IR tracking	WT G10 -IR	186.2	0.00362131	0.173017	457	2
004 30ms181012 BRCA2-Halo PCNA-iRFP IR tracking	WT G10 -IR	187.2	0.146699	0.577518	501	1
004 30ms181012 BRCA2-Halo PCNA-iRFP IR tracking	WT G10 -IR	189.1	3.73941	0.629821	508	0
004 30ms181012 BRCA2-Halo PCNA-iRFP IR tracking	WT G10 -IR	193.2	0.00621121	0.260589	473	2
004 30ms181012 BRCA2-Halo PCNA-iRFP IR tracking	WT G10 -IR	201.2	0.00155328	0.166382	512	2
004 30ms181012 BRCA2-Halo PCNA-iRFP IR tracking	WT G10 -IR	203.1	0.619115	0.338482	549	0
004 30ms181012 BRCA2-Halo PCNA-iRFP IR tracking	WT G10 -IR	204.1	0.00376767	-0.0672802	396	2
004 30ms181012 BRCA2-Halo PCNA-iRFP IR tracking	WT G10 -IR	204.4	0.0051982	0.252414	451	2
004 30ms181012 BRCA2-Halo PCNA-iRFP IR tracking	WT G10 -IR	207.2	0.0037852	0.179185	541	2
004 30ms181012 BRCA2-Halo PCNA-iRFP IR tracking	WT G10 -IR	210.3	0.00675778	0.284471	567	2
004 30ms181012 BRCA2-Halo PCNA-iRFP IR tracking	WT G10 -IR	214.2	0.00128843	0.15678	561	2
004 30ms181012 BRCA2-Halo PCNA-iRFP IR tracking	WT G10 -IR	216.1	0.00415773	0.225393	577	2
004 30ms181012 BRCA2-Halo PCNA-iRFP IR tracking	WT G10 -IR	218.1	5.9079	0.588183	603	0
004 30ms181012 BRCA2-Halo PCNA-iRFP IR tracking	WT G10 -IR	221.7	1.08806	0.28703	625	0
004 30ms181012 BRCA2-Halo PCNA-iRFP IR tracking	WT G10 -IR	222.2	0.000310582	0.202122	590	2
004 30ms181012 BRCA2-Halo PCNA-iRFP IR tracking	WT G10 -IR	223.2	0.00042261	0.061666	542	2
004 30ms181012 BRCA2-Halo PCNA-iRFP IR tracking	WT G10 -IR	227.1	0.000782301	0.0485709	649	2
004 30ms181012 BRCA2-Halo PCNA-iRFP IR tracking	WT G10 -IR	229.1	0.00286785	0.181228	634	2
004 30ms181012 BRCA2-Halo PCNA-iRFP IR tracking	WT G10 -IR	231.2	0.000351775	0.121426	667	2
004 30ms181012 BRCA2-Halo PCNA-iRFP IR tracking	WT G10 -IR	232.1	0.00414353	0.212161	650	2
004 30ms181012 BRCA2-Halo PCNA-iRFP IR tracking	WT G10 -IR	233.1	0.00323037	0.165533	674	2
004 30ms181012 BRCA2-Halo PCNA-iRFP IR tracking	WT G10 -IR	234.1	3.0303	0.489508	682	0
004 30ms181012 BRCA2-Halo PCNA-iRFP IR tracking	WT G10 -IR	240.1	0.134424	0.681829	703	1
004 30ms181012 BRCA2-Halo PCNA-iRFP IR tracking	WT G10 -IR	240.4	0.000179295	0.143923	739	2
004 30ms181012 BRCA2-Halo PCNA-iRFP IR tracking	WT G10 -IR	243.11	0.00889011	0.279252	802	0
004 30ms181012 BRCA2-Halo PCNA-iRFP IR tracking	WT G10 -IR	244.1	1.325	0.22105	774	1
004 30ms181012 BRCA2-Halo PCNA-iRFP IR tracking	WT G10 -IR	247.4	0.0109271	0.314147	758	2
004 30ms181012 BRCA2-Halo PCNA-iRFP IR tracking	WT G10 -IR	249.4	0.000831645	-0.0324429	800	2
004 30ms181012 BRCA2-Halo PCNA-iRFP IR tracking	WT G10 -IR	253.1	0.339699	-0.0911868	812	0
004 30ms181012 BRCA2-Halo PCNA-iRFP IR tracking	WT G10 -IR	254.1	0.506547	0.0510359	833	0
004 30ms181012 BRCA2-Halo PCNA-iRFP IR tracking	WT G10 -IR	255.1	7.67762e-05	0.0773128	822	2
004 30ms181012 BRCA2-Halo PCNA-iRFP IR tracking	WT G10 -IR	256.1	1.15192	0.283156	839	0
004 30ms181012 BRCA2-Halo PCNA-iRFP IR tracking	WT G10 -IR	258.2	0.0032314	0.111319	807	2
004 30ms181012 BRCA2-Halo PCNA-iRFP IR tracking	WT G10 -IR	261.1	0.00157902	0.0621253	842	2
004 30ms181012 BRCA2-Halo PCNA-iRFP IR tracking	WT G10 -IR	266.3	0.00241403	0.0801796	866	1
004 30ms181012 BRCA2-Halo PCNA-iRFP IR tracking	WT G10 -IR	274.3	0.00658741	0.218222	914	1
004 30ms181012 BRCA2-Halo PCNA-iRFP IR tracking	WT G10 -IR	277.2	0.00386348	0.183162	913	2
004 30ms181012 BRCA2-Halo PCNA-iRFP IR tracking	WT G10 -IR	278.1	0.00117608	0.240486	923	2
004 30ms181012 BRCA2-Halo PCNA-iRFP IR tracking	WT G10 -IR	279.1	0.00322594	0.330218	843	2
004 30ms181012 BRCA2-Halo PCNA-iRFP IR tracking	WT G10 -IR	279.3	0.0746615	0.381935	893	1
004 30ms181012 BRCA2-Halo PCNA-iRFP IR tracking	WT G10 -IR	279.5	0.0862558	0.353694	906	1
004 30ms181012 BRCA2-Halo PCNA-iRFP IR tracking	WT G10 -IR	279.6	0.00417445	0.299955	918	2
004 30ms181012 BRCA2-Halo PCNA-iRFP IR tracking	WT G10 -IR	280.1	2.64792	0.344858	937	0
004 30ms181012 BRCA2-Halo PCNA-iRFP IR tracking	WT G10 -IR	281.1	0.00273832	0.236935	947	2
004 30ms181012 BRCA2-Halo PCNA-iRFP IR tracking	WT G10 -IR	285.2	0.0738883	0.533593	965	1
004 30ms181012 BRCA2-Halo PCNA-iRFP IR tracking	WT G10 -IR	289.1	0.000742997	0.0904414	993	2
004 30ms181012 BRCA2-Halo PCNA-iRFP IR tracking	WT G10 -IR	293.1	2.81333	0.615916	1017	0
004 30ms181012 BRCA2-Halo PCNA-iRFP IR tracking	WT G10 -IR	294.1	1.06967	0.228388	1022	0
004 30ms181012 BRCA2-Halo PCNA-iRFP IR tracking	WT G10 -IR	295.1	1.06039	0.306551	1032	0
004 30ms181012 BRCA2-Halo PCNA-iRFP IR tracking	WT G10 -IR	296.1	0.165852	0.0580079	1033	0
004 30ms181012 BRCA2-Halo PCNA-iRFP IR tracking	WT G10 -IR	298.4	0.114737	0.374388	1054	1
004 30ms181012 BRCA2-Halo PCNA-iRFP IR tracking	WT G10 -IR	302.2	0.0841406	0.342578	1030	1
004 30ms181012 BRCA2-Halo PCNA-iRFP IR tracking	WT G10 -IR	302.6	0.00217283	0.092458	1052	1
004 30ms181012 BRCA2-Halo PCNA-iRFP IR tracking	WT G10 -IR	303.2	0.00056246	0.0363991	1057	2
004 30ms181012 BRCA2-Halo PCNA-iRFP IR tracking	WT G10 -IR	303.4	1.92073	0.24253	1082	0
004 30ms181012 BRCA2-Halo PCNA-iRFP IR tracking	WT G10 -IR	308.1	0.000840496	0.0873232	999	2
004 30ms181012 BRCA2-Halo PCNA-iRFP IR tracking	WT G10 -IR	314.1	0.000906473	-0.0402207	1093	2
004 30ms181012 BRCA2-Halo PCNA-iRFP IR tracking	WT G10 -IR	321.1	0.000446439	0.133819	1146	2
004 30ms181012 BRCA2-Halo PCNA-iRFP IR tracking	WT G10 -IR	325.6	0.00149641	0.0399863	1240	2
004 30ms181012 BRCA2-Halo PCNA-iRFP IR tracking	WT G10 -IR	326.1	0.000426798	-0.0317385	1178	2
004 30ms181012 BRCA2-Halo PCNA-iRFP IR tracking	WT G10 -IR	328.1	0.00247065	0.0342958	1347	2
004 30ms181012 BRCA2-Halo PCNA-iRFP IR tracking	WT G10 -IR	328.5	0.00181489	0.0489541	1256	2
004 30ms181012 BRCA2-Halo PCNA-iRFP IR tracking	WT G10 -IR	329.2	0.00331568	0.129495	1207	1
004 30ms181012 BRCA2-Halo PCNA-iRFP IR tracking	WT G10 -IR	329.4	0.0326299	0.135852	1230	1
004 30ms181012 BRCA2-Halo PCNA-iRFP IR tracking	WT G10 -IR	329.6	0.0504117	0.375171	1257	1
004 30ms181012 BRCA2-Halo PCNA-iRFP IR tracking	WT G10 -IR	333.1	1.47636	0.289298	1269	0
004 30ms181012 BRCA2-Halo PCNA-iRFP IR tracking	WT G10 -IR	334.1	1.90361	0.232383	1284	0
004 30ms181012 BRCA2-Halo PCNA-iRFP IR tracking	WT G10 -IR	337.1	0.000139239	-0.0665836	1274	2
004 30ms181012 BRCA2-Halo PCNA-iRFP IR tracking	WT G10 -IR	339.1	0.926455	0.52677	1316	0
004 30ms181012 BRCA2-Halo PCNA-iRFP IR tracking	WT G10 -IR	339.2	0.00381755	0.11315	1332	2
004 30ms181012 BRCA2-Halo PCNA-iRFP IR tracking	WT G10 -IR	340.1	0.00494589	0.601861	1317	2
004 30ms181012 BRCA2-Halo PCNA-iRFP IR tracking	WT G10 -IR	341.1	0.00656608	0.251348	1273	2
004 30ms181012 BRCA2-Halo PCNA-iRFP IR tracking	WT G10 -IR	341.13	0.00612867	0.184546	1309	2
004 30ms181012 BRCA2-Halo PCNA-iRFP IR tracking	WT G10 -IR	341.4	0.0028321	0.0135902	1236	2
004 30ms181012 BRCA2-Halo PCNA-iRFP IR tracking	WT G10 -IR	341.6	0.0196862	0.379054	1254	2
004 30ms181012 BRCA2-Halo PCNA-iRFP IR tracking	WT G10 -IR	342.1	0.211306	0.254696	1369	2
004 30ms181012 BRCA2-Halo PCNA-iRFP IR tracking	WT G10 -IR	345.1	0.0370634	0.122036	1373	1
004 30ms181012 BRCA2-Halo PCNA-iRFP IR tracking	WT G10 -IR	355.2	0.000393043	0.0562728	1449	2
004 30ms181012 BRCA2-Halo PCNA-iRFP IR tracking	WT G10 -IR	356.1	0.0035984	0.218459	1422	2
004 30ms181012 BRCA2-Halo PCNA-iRFP IR tracking	WT G10 -IR	357.1	0.00588788	0.143825	1374	2
004 30ms181012 BRCA2-Halo PCNA-iRFP IR tracking	WT G10 -IR	357.3	0.00560626	0.287179	1414	2
004 30ms181012 BRCA2-Halo PCNA-iRFP IR tracking	WT G10 -IR	360.1	0.000728596	0.0149189	1447	2
004 30ms181012 BRCA2-Halo PCNA-iRFP IR tracking	WT G10 -IR	363.2	0.0967593	0.308195	1541	1
004 30ms181012 BRCA2-Halo PCNA-iRFP IR tracking	WT G10 -IR	364.1	1.75149	0.705393	1568	0
004 30ms181012 BRCA2-Halo PCNA-iRFP IR tracking	WT G10 -IR	365.1	0.726442	0.133765	1571	0
004 30ms181012 BRCA2-Halo PCNA-iRFP IR tracking	WT G10 -IR	366.1	2.62697	0.290907	1588	0
004 30ms181012 BRCA2-Halo PCNA-iRFP IR tracking	WT G10 -IR	375.4	0.00466189	0.126453	1526	2
004 30ms181012 BRCA2-Halo PCNA-iRFP IR tracking	WT G10 -IR	375.6	0.00486434	0.406902	1590	2
004 30ms181012 BRCA2-Halo PCNA-iRFP IR tracking	WT G10 -IR	376.1	0.222705	-0.0676962	1702	0
004 30ms181012 BRCA2-Halo PCNA-iRFP IR tracking	WT G10 -IR	377.2	0.00116413	0.122647	1720	2
004 30ms181012 BRCA2-Halo PCNA-iRFP IR tracking	WT G10 -IR	378.1	1.17231	0.628938	1717	0
004 30ms181012 BRCA2-Halo PCNA-iRFP IR tracking	WT G10 -IR	380.1	0.203518	0.647148	1742	1
004 30ms181012 BRCA2-Halo PCNA-iRFP IR tracking	WT G10 -IR	381.1	0.0474673	0.238339	1694	1
004 30ms181012 BRCA2-Halo PCNA-iRFP IR tracking	WT G10 -IR	381.4	0.00248553	0.152951	1722	2
004 30ms181012 BRCA2-Halo PCNA-iRFP IR tracking	WT G10 -IR	381.6	0.00385511	0.323832	1765	2
004 30ms181012 BRCA2-Halo PCNA-iRFP IR tracking	WT G10 -IR	383.1	0.00207555	0.211361	1722	2
004 30ms181012 BRCA2-Halo PCNA-iRFP IR tracking	WT G10 -IR	384.2	0.00573081	0.372557	1764	2
004 30ms181012 BRCA2-Halo PCNA-iRFP IR tracking	WT G10 -IR	384.4	0.0134027	0.495089	1818	2
004 30ms181012 BRCA2-Halo PCNA-iRFP IR tracking	WT G10 -IR	385.2	0.00428693	0.187212	1842	1
004 30ms181012 BRCA2-Halo PCNA-iRFP IR tracking	WT G10 -IR	385.3	0.00112417	0.100919	1871	2
004 30ms181012 BRCA2-Halo PCNA-iRFP IR tracking	WT G10 -IR	386.2	1.31348	0.432116	1915	0
004 30ms181012 BRCA2-Halo PCNA-iRFP IR tracking	WT G10 -IR	387.1	0.32961	0.0832106	1914	0
004 30ms181012 BRCA2-Halo PCNA-iRFP IR tracking	WT G10 -IR	389.1	0.000319078	0.0956879	1916	2
004 30ms181012 BRCA2-Halo PCNA-iRFP IR tracking	WT G10 -IR	389.3	0.000635124	-0.00564088	1974	2
004 30ms181012 BRCA2-Halo PCNA-iRFP IR tracking	WT G10 -IR	390.1	0.0472258	0.272135	1955	1
004 30ms181012 BRCA2-Halo PCNA-iRFP IR tracking	WT G10 -IR	390.2	1.25755	0.59976	1975	0
005 30ms181005 BRCA2-Halo PCNA-iRFP IR tracking	WT G10 -IR	8.1	7.24517	0.515514	5	0
005 30ms181005 BRCA2-Halo PCNA-iRFP IR tracking	WT G10 -IR	10.2	0.00119243	0.0348677	7	1
005 30ms181005 BRCA2-Halo PCNA-iRFP IR tracking	WT G10 -IR	13.3	0.611914	0.0281037	16	0
005 30ms181005 BRCA2-Halo PCNA-iRFP IR tracking	WT G10 -IR	13.8	0.0180252	-0.00520317	33	0
005 30ms181005 BRCA2-Halo PCNA-iRFP IR tracking	WT G10 -IR	18.1	0.00242478	0.243888	12	2
005 30ms181005 BRCA2-Halo PCNA-iRFP IR tracking	WT G10 -IR	18.4	0.00332699	0.404972	64	2
005 30ms181005 BRCA2-Halo PCNA-iRFP IR tracking	WT G10 -IR	22.1	1.328	0.312332	19	0
005 30ms181005 BRCA2-Halo PCNA-iRFP IR tracking	WT G10 -IR	25.1	1.96226	0.361773	40	0
005 30ms181005 BRCA2-Halo PCNA-iRFP IR tracking	WT G10 -IR	26.3	0.173133	0.6069	32	1
005 30ms181005 BRCA2-Halo PCNA-iRFP IR tracking	WT G10 -IR	27.1	3.33434	0.345493	36	0
005 30ms181005 BRCA2-Halo PCNA-iRFP IR tracking	WT G10 -IR	28.1	0.000288227	-0.0844705	0	2
005 30ms181005 BRCA2-Halo PCNA-iRFP IR tracking	WT G10 -IR	28.5	0.00138291	0.0646889	19	2
005 30ms181005 BRCA2-Halo PCNA-iRFP IR tracking	WT G10 -IR	33.6	0.876251	0.206271	64	0
005 30ms181005 BRCA2-Halo PCNA-iRFP IR tracking	WT G10 -IR	34.1	0.00135448	0.25921	0	2
005 30ms181005 BRCA2-Halo PCNA-iRFP IR tracking	WT G10 -IR	37.1	0.000571903	0.104904	0	2
005 30ms181005 BRCA2-Halo PCNA-iRFP IR tracking	WT G10 -IR	38.4	0.00306282	0.25342	53	2
005 30ms181005 BRCA2-Halo PCNA-iRFP IR tracking	WT G10 -IR	41.1	0.00157942	0.143856	18	2
005 30ms181005 BRCA2-Halo PCNA-iRFP IR tracking	WT G10 -IR	49.1	0.803196	0.0752039	64	0
005 30ms181005 BRCA2-Halo PCNA-iRFP IR tracking	WT G10 -IR	49.2	0.0958309	0.411928	94	1
005 30ms181005 BRCA2-Halo PCNA-iRFP IR tracking	WT G10 -IR	49.6	0.186719	0.505586	132	1
005 30ms181005 BRCA2-Halo PCNA-iRFP IR tracking	WT G10 -IR	49.9	1.36368	0.507436	155	0
005 30ms181005 BRCA2-Halo PCNA-iRFP IR tracking	WT G10 -IR	50.1	3.25782	0.298701	70	0
005 30ms181005 BRCA2-Halo PCNA-iRFP IR tracking	WT G10 -IR	52.2	0.0250067	0.0661069	75	0
005 30ms181005 BRCA2-Halo PCNA-iRFP IR tracking	WT G10 -IR	53.6	0.86698	0.273933	78	0
005 30ms181005 BRCA2-Halo PCNA-iRFP IR tracking	WT G10 -IR	54.1	0.148164	0.144603	69	0
005 30ms181005 BRCA2-Halo PCNA-iRFP IR tracking	WT G10 -IR	62.1	4.75148	0.603604	78	0
005 30ms181005 BRCA2-Halo PCNA-iRFP IR tracking	WT G10 -IR	63.1	0.00145861	0.14655	0	2
005 30ms181005 BRCA2-Halo PCNA-iRFP IR tracking	WT G10 -IR	63.6	0.00732689	0.29187	30	2
005 30ms181005 BRCA2-Halo PCNA-iRFP IR tracking	WT G10 -IR	63.9	0.0115887	0.00883762	67	1
005 30ms181005 BRCA2-Halo PCNA-iRFP IR tracking	WT G10 -IR	77.1	0.595763	0.231036	105	0
005 30ms181005 BRCA2-Halo PCNA-iRFP IR tracking	WT G10 -IR	78.7	0.0146844	0.349866	128	2
005 30ms181005 BRCA2-Halo PCNA-iRFP IR tracking	WT G10 -IR	78.8	0.00498372	0.208264	140	1
005 30ms181005 BRCA2-Halo PCNA-iRFP IR tracking	WT G10 -IR	81.3	2.42656	0.607343	98	0
005 30ms181005 BRCA2-Halo PCNA-iRFP IR tracking	WT G10 -IR	83.1	3.95325	0.647451	102	0
005 30ms181005 BRCA2-Halo PCNA-iRFP IR tracking	WT G10 -IR	84.1	1.09667	0.416996	104	0
005 30ms181005 BRCA2-Halo PCNA-iRFP IR tracking	WT G10 -IR	89.2	0.00647995	0.155396	72	1
005 30ms181005 BRCA2-Halo PCNA-iRFP IR tracking	WT G10 -IR	90.3	0.834393	0.203824	93	0
005 30ms181005 BRCA2-Halo PCNA-iRFP IR tracking	WT G10 -IR	91.1	2.5893	0.416179	93	0
005 30ms181005 BRCA2-Halo PCNA-iRFP IR tracking	WT G10 -IR	95.1	1.64744	0.240558	114	0
005 30ms181005 BRCA2-Halo PCNA-iRFP IR tracking	WT G10 -IR	96.1	3.34563	0.504954	100	0
005 30ms181005 BRCA2-Halo PCNA-iRFP IR tracking	WT G10 -IR	100.3	0.0146614	0.251063	129	2
005 30ms181005 BRCA2-Halo PCNA-iRFP IR tracking	WT G10 -IR	100.4	0.00495512	-0.00335241	141	1
005 30ms181005 BRCA2-Halo PCNA-iRFP IR tracking	WT G10 -IR	101.5	5.92113e-05	0.119388	100	2
005 30ms181005 BRCA2-Halo PCNA-iRFP IR tracking	WT G10 -IR	101.7	3.81819	0.57614	113	0
005 30ms181005 BRCA2-Halo PCNA-iRFP IR tracking	WT G10 -IR	102.3	1.56448	0.277877	126	0
005 30ms181005 BRCA2-Halo PCNA-iRFP IR tracking	WT G10 -IR	102.4	0.254789	0.454089	158	1
005 30ms181005 BRCA2-Halo PCNA-iRFP IR tracking	WT G10 -IR	105.1	1.3511	0.190689	113	0
005 30ms181005 BRCA2-Halo PCNA-iRFP IR tracking	WT G10 -IR	112.1	3.20193	0.47961	127	0
005 30ms181005 BRCA2-Halo PCNA-iRFP IR tracking	WT G10 -IR	113.3	0.0133364	-0.0737986	87	1
005 30ms181005 BRCA2-Halo PCNA-iRFP IR tracking	WT G10 -IR	113.4	0.00539249	0.26536	99	2
005 30ms181005 BRCA2-Halo PCNA-iRFP IR tracking	WT G10 -IR	114.4	0.0602645	0.190001	139	1
005 30ms181005 BRCA2-Halo PCNA-iRFP IR tracking	WT G10 -IR	125.1	2.86936	0.404999	133	0
005 30ms181005 BRCA2-Halo PCNA-iRFP IR tracking	WT G10 -IR	129.5	0.00913796	0.092327	134	1
005 30ms181005 BRCA2-Halo PCNA-iRFP IR tracking	WT G10 -IR	130.1	2.69593	0.558679	149	0
005 30ms181005 BRCA2-Halo PCNA-iRFP IR tracking	WT G10 -IR	133.2	0.00518363	0.185857	147	2
005 30ms181005 BRCA2-Halo PCNA-iRFP IR tracking	WT G10 -IR	138.1	7.13211	0.695517	167	0
005 30ms181005 BRCA2-Halo PCNA-iRFP IR tracking	WT G10 -IR	139.8	0.0119775	0.174921	169	1
005 30ms181005 BRCA2-Halo PCNA-iRFP IR tracking	WT G10 -IR	141.1	2.89257	0.618246	169	0
005 30ms181005 BRCA2-Halo PCNA-iRFP IR tracking	WT G10 -IR	142.1	2.43222	0.368585	159	0
005 30ms181005 BRCA2-Halo PCNA-iRFP IR tracking	WT G10 -IR	143.1	0.030431	0.110625	164	1
005 30ms181005 BRCA2-Halo PCNA-iRFP IR tracking	WT G10 -IR	143.4	0.565338	0.157345	178	0
005 30ms181005 BRCA2-Halo PCNA-iRFP IR tracking	WT G10 -IR	144.3	0.362623	0.0373626	167	0
005 30ms181005 BRCA2-Halo PCNA-iRFP IR tracking	WT G10 -IR	147.3	0.000691905	0.00146941	171	1
005 30ms181005 BRCA2-Halo PCNA-iRFP IR tracking	WT G10 -IR	148.1	1.9663	0.41948	174	0
005 30ms181005 BRCA2-Halo PCNA-iRFP IR tracking	WT G10 -IR	153.1	5.0091	0.551176	177	0
005 30ms181005 BRCA2-Halo PCNA-iRFP IR tracking	WT G10 -IR	155.1	0.249935	0.123639	163	0
005 30ms181005 BRCA2-Halo PCNA-iRFP IR tracking	WT G10 -IR	157.4	0.69697	0.290996	181	0
005 30ms181005 BRCA2-Halo PCNA-iRFP IR tracking	WT G10 -IR	158.2	0.0308023	0.310758	170	1
005 30ms181005 BRCA2-Halo PCNA-iRFP IR tracking	WT G10 -IR	161.1	0.00256554	0.226576	130	2
005 30ms181005 BRCA2-Halo PCNA-iRFP IR tracking	WT G10 -IR	161.3	0.00170436	0.079412	161	2
005 30ms181005 BRCA2-Halo PCNA-iRFP IR tracking	WT G10 -IR	162.1	2.70259	0.471263	191	0
005 30ms181005 BRCA2-Halo PCNA-iRFP IR tracking	WT G10 -IR	168.1	2.49245	0.315854	182	0
005 30ms181005 BRCA2-Halo PCNA-iRFP IR tracking	WT G10 -IR	169.1	0.00353167	0.256413	173	2
005 30ms181005 BRCA2-Halo PCNA-iRFP IR tracking	WT G10 -IR	169.3	0.00259043	0.29175	210	2
005 30ms181005 BRCA2-Halo PCNA-iRFP IR tracking	WT G10 -IR	171.1	5.98445	0.615015	196	0
005 30ms181005 BRCA2-Halo PCNA-iRFP IR tracking	WT G10 -IR	175.1	0.105939	-0.224386	187	0
005 30ms181005 BRCA2-Halo PCNA-iRFP IR tracking	WT G10 -IR	179.1	3.24262	0.385378	207	0
005 30ms181005 BRCA2-Halo PCNA-iRFP IR tracking	WT G10 -IR	182.3	0.024841	0.148191	200	1
005 30ms181005 BRCA2-Halo PCNA-iRFP IR tracking	WT G10 -IR	183.1	9.8003	0.813121	211	0
005 30ms181005 BRCA2-Halo PCNA-iRFP IR tracking	WT G10 -IR	188.1	0.0921989	0.00369853	217	0
005 30ms181005 BRCA2-Halo PCNA-iRFP IR tracking	WT G10 -IR	189.1	0.664562	0.18409	214	0
005 30ms181005 BRCA2-Halo PCNA-iRFP IR tracking	WT G10 -IR	191.2	0.00891327	-0.0445526	224	2
005 30ms181005 BRCA2-Halo PCNA-iRFP IR tracking	WT G10 -IR	192.1	0.402536	0.0673092	230	0
005 30ms181005 BRCA2-Halo PCNA-iRFP IR tracking	WT G10 -IR	194.1	0.718086	0.34975	228	0
005 30ms181005 BRCA2-Halo PCNA-iRFP IR tracking	WT G10 -IR	194.2	0.0085603	0.250805	256	2
005 30ms181005 BRCA2-Halo PCNA-iRFP IR tracking	WT G10 -IR	199.2	0.000547511	-0.0603567	211	2
005 30ms181005 BRCA2-Halo PCNA-iRFP IR tracking	WT G10 -IR	201.1	0.213837	0.6117	220	1
005 30ms181005 BRCA2-Halo PCNA-iRFP IR tracking	WT G10 -IR	202.1	0.598199	0.240451	245	0
005 30ms181005 BRCA2-Halo PCNA-iRFP IR tracking	WT G10 -IR	219.1	2.02323	0.417766	252	0
005 30ms181005 BRCA2-Halo PCNA-iRFP IR tracking	WT G10 -IR	226.1	0.00174131	0.196209	272	2
005 30ms181005 BRCA2-Halo PCNA-iRFP IR tracking	WT G10 -IR	240.1	5.5425	0.594871	298	0
005 30ms181005 BRCA2-Halo PCNA-iRFP IR tracking	WT G10 -IR	240.6	0.00507781	0.340558	333	2
005 30ms181005 BRCA2-Halo PCNA-iRFP IR tracking	WT G10 -IR	241.4	0.0128553	0.372088	292	2
005 30ms181005 BRCA2-Halo PCNA-iRFP IR tracking	WT G10 -IR	243.2	0.199155	0.428555	292	1
005 30ms181005 BRCA2-Halo PCNA-iRFP IR tracking	WT G10 -IR	244.1	0.443503	-0.0132456	297	0
005 30ms181005 BRCA2-Halo PCNA-iRFP IR tracking	WT G10 -IR	246.1	1.47789	0.496314	298	0
005 30ms181005 BRCA2-Halo PCNA-iRFP IR tracking	WT G10 -IR	248.1	1.3165	0.49525	315	0
005 30ms181005 BRCA2-Halo PCNA-iRFP IR tracking	WT G10 -IR	249.2	0.0514695	0.377011	315	1
005 30ms181005 BRCA2-Halo PCNA-iRFP IR tracking	WT G10 -IR	256.1	2.35395	0.613762	335	0
005 30ms181005 BRCA2-Halo PCNA-iRFP IR tracking	WT G10 -IR	264.2	0.00302878	0.158398	344	2
005 30ms181005 BRCA2-Halo PCNA-iRFP IR tracking	WT G10 -IR	265.1	0.845735	0.176838	336	0
005 30ms181005 BRCA2-Halo PCNA-iRFP IR tracking	WT G10 -IR	275.1	1.46036	0.216412	357	0
005 30ms181005 BRCA2-Halo PCNA-iRFP IR tracking	WT G10 -IR	276.1	0.522193	0.122538	367	0
005 30ms181005 BRCA2-Halo PCNA-iRFP IR tracking	WT G10 -IR	278.1	0.696881	0.492166	364	0
005 30ms181005 BRCA2-Halo PCNA-iRFP IR tracking	WT G10 -IR	284.1	0.301906	0.0168605	376	0
005 30ms181005 BRCA2-Halo PCNA-iRFP IR tracking	WT G10 -IR	285.1	1.59861	0.399002	372	0
005 30ms181005 BRCA2-Halo PCNA-iRFP IR tracking	WT G10 -IR	287.4	5.16698	0.52322	387	0
005 30ms181005 BRCA2-Halo PCNA-iRFP IR tracking	WT G10 -IR	296.1	1.35047	0.308366	401	0
005 30ms181005 BRCA2-Halo PCNA-iRFP IR tracking	WT G10 -IR	297.1	5.95679	0.448531	413	0
005 30ms181005 BRCA2-Halo PCNA-iRFP IR tracking	WT G10 -IR	310.1	1.17494	0.241967	434	0
005 30ms181005 BRCA2-Halo PCNA-iRFP IR tracking	WT G10 -IR	313.2	0.00171209	-0.00238488	444	1
005 30ms181005 BRCA2-Halo PCNA-iRFP IR tracking	WT G10 -IR	314.1	0.150244	-0.0884546	435	0
005 30ms181005 BRCA2-Halo PCNA-iRFP IR tracking	WT G10 -IR	322.3	0.00409147	0.068754	472	2
005 30ms181005 BRCA2-Halo PCNA-iRFP IR tracking	WT G10 -IR	322.7	0.00405478	0.113415	523	2
005 30ms181005 BRCA2-Halo PCNA-iRFP IR tracking	WT G10 -IR	327.1	2.41541	0.577613	461	0
005 30ms181005 BRCA2-Halo PCNA-iRFP IR tracking	WT G10 -IR	331.1	1.18183	0.373954	472	0
005 30ms181005 BRCA2-Halo PCNA-iRFP IR tracking	WT G10 -IR	345.1	0.0963876	-0.146871	516	0
005 30ms181005 BRCA2-Halo PCNA-iRFP IR tracking	WT G10 -IR	346.2	0.584394	0.507407	517	0
005 30ms181005 BRCA2-Halo PCNA-iRFP IR tracking	WT G10 -IR	348.1	3.26856	0.466187	525	0
005 30ms181005 BRCA2-Halo PCNA-iRFP IR tracking	WT G10 -IR	352.1	0.00125401	0.0329659	534	1
005 30ms181005 BRCA2-Halo PCNA-iRFP IR tracking	WT G10 -IR	352.23	0.00282611	0.00236438	603	2
005 30ms181005 BRCA2-Halo PCNA-iRFP IR tracking	WT G10 -IR	352.28	0.00475256	0.199465	641	2
005 30ms181005 BRCA2-Halo PCNA-iRFP IR tracking	WT G10 -IR	352.3	0.000264103	0.0435215	681	2
005 30ms181005 BRCA2-Halo PCNA-iRFP IR tracking	WT G10 -IR	352.32	0.00634291	0.190676	715	2
005 30ms181005 BRCA2-Halo PCNA-iRFP IR tracking	WT G10 -IR	352.7	0.0109448	0.0355879	500	2
005 30ms181005 BRCA2-Halo PCNA-iRFP IR tracking	WT G10 -IR	362.2	0.00517154	0.0394158	574	1
005 30ms181005 BRCA2-Halo PCNA-iRFP IR tracking	WT G10 -IR	364.1	3.11891	0.389152	576	0
005 30ms181005 BRCA2-Halo PCNA-iRFP IR tracking	WT G10 -IR	370.2	1.12665	0.331363	600	0
005 30ms181005 BRCA2-Halo PCNA-iRFP IR tracking	WT G10 -IR	371.2	0.380178	0.427517	610	0
005 30ms181005 BRCA2-Halo PCNA-iRFP IR tracking	WT G10 -IR	371.3	0.116126	0.397309	622	1
005 30ms181005 BRCA2-Halo PCNA-iRFP IR tracking	WT G10 -IR	371.9	0.23649	0.527377	660	1
005 30ms181005 BRCA2-Halo PCNA-iRFP IR tracking	WT G10 -IR	374.2	0.0014748	0.0254446	615	2
005 30ms181005 BRCA2-Halo PCNA-iRFP IR tracking	WT G10 -IR	384.2	3.15288	0.364589	678	0
005 30ms181005 BRCA2-Halo PCNA-iRFP IR tracking	WT G10 -IR	397.2	0.001	0.102164	685	2
005 30ms181005 BRCA2-Halo PCNA-iRFP IR tracking	WT G10 -IR	402.1	0.264715	0.279976	743	0
005 30ms181005 BRCA2-Halo PCNA-iRFP IR tracking	WT G10 -IR	405.9	0.186121	0.100252	745	0
005 30ms181005 BRCA2-Halo PCNA-iRFP IR tracking	WT G10 -IR	416.1	1.03001	0.0385512	787	0
005 30ms181005 BRCA2-Halo PCNA-iRFP IR tracking	WT G10 -IR	419.1	1.95156	0.242011	788	0
005 30ms181005 BRCA2-Halo PCNA-iRFP IR tracking	WT G10 -IR	429.1	0.0118481	0.42213	802	2
005 30ms181005 BRCA2-Halo PCNA-iRFP IR tracking	WT G10 -IR	430.1	0.959022	0.0906325	818	0
005 30ms181005 BRCA2-Halo PCNA-iRFP IR tracking	WT G10 -IR	431.6	0.123624	0.500762	852	1
005 30ms181005 BRCA2-Halo PCNA-iRFP IR tracking	WT G10 -IR	434.1	2.11791	0.333725	835	0
005 30ms181005 BRCA2-Halo PCNA-iRFP IR tracking	WT G10 -IR	438.1	0.00286604	0.135949	848	2
005 30ms181005 BRCA2-Halo PCNA-iRFP IR tracking	WT G10 -IR	443.1	0.828606	0.488051	927	0
005 30ms181005 BRCA2-Halo PCNA-iRFP IR tracking	WT G10 -IR	444.1	0.00347124	-0.0245481	938	1
005 30ms181005 BRCA2-Halo PCNA-iRFP IR tracking	WT G10 -IR	446.1	0.00104288	0.197278	934	2
005 30ms181005 BRCA2-Halo PCNA-iRFP IR tracking	WT G10 -IR	455.1	3.04323	0.646663	1015	0
005 30ms181005 BRCA2-Halo PCNA-iRFP IR tracking	WT G10 -IR	462.5	0.00124453	0.0392847	1058	2
005 30ms181005 BRCA2-Halo PCNA-iRFP IR tracking	WT G10 -IR	467.2	0.0556671	0.331905	1155	1
005 30ms181005 BRCA2-Halo PCNA-iRFP IR tracking	WT G10 -IR	470.1	0.00261968	0.18591	1207	2
005 30ms181005 BRCA2-Halo PCNA-iRFP IR tracking	WT G10 -IR	474.1	0.00225565	0.231352	1250	2
005 30ms181005 BRCA2-Halo PCNA-iRFP IR tracking	WT G10 -IR	484.1	1.79547	0.481396	1383	0
005 30ms181005 BRCA2-Halo PCNA-iRFP IR tracking	WT G10 -IR	489.1	0.00199259	-0.06397	1431	2
005 30ms181005 BRCA2-Halo PCNA-iRFP IR tracking	WT G10 -IR	491.1	0.639148	0.210406	1466	0
005 30ms181005 BRCA2-Halo PCNA-iRFP IR tracking	WT G10 -IR	493.3	0.00106259	0.170472	1490	2
005 30ms181005 BRCA2-Halo PCNA-iRFP IR tracking	WT G10 -IR	493.5	0.00377289	0.180069	1525	2
005 30ms181005 BRCA2-Halo PCNA-iRFP IR tracking	WT G10 -IR	497.1	0.0357626	0.157339	1480	1
005 30ms181005 BRCA2-Halo PCNA-iRFP IR tracking	WT G10 -IR	498.1	0.00532288	0.175606	1441	2
005 30ms181005 BRCA2-Halo PCNA-iRFP IR tracking	WT G10 -IR	498.4	0.00522557	0.120641	1461	2
005 30ms181005 BRCA2-Halo PCNA-iRFP IR tracking	WT G10 -IR	498.6	0.00175103	0.276799	1502	2
005 30ms181005 BRCA2-Halo PCNA-iRFP IR tracking	WT G10 -IR	499.1	0.000553961	-0.0347228	1491	2
005 30ms181005 BRCA2-Halo PCNA-iRFP IR tracking	WT G10 -IR	499.3	0.0018303	0.150726	1562	2
005 30ms181005 BRCA2-Halo PCNA-iRFP IR tracking	WT G10 -IR	499.5	0.00136441	0.164136	1576	2
005 30ms181005 BRCA2-Halo PCNA-iRFP IR tracking	WT G10 -IR	501.1	0.00447991	0.344092	1587	2
005 30ms181005 BRCA2-Halo PCNA-iRFP IR tracking	WT G10 -IR	503.1	0.777508	0.571987	1660	0
005 30ms181005 BRCA2-Halo PCNA-iRFP IR tracking	WT G10 -IR	505.1	0.0223229	0.372713	1720	1
005 30ms181005 BRCA2-Halo PCNA-iRFP IR tracking	WT G10 -IR	507.1	1.74316	0.659095	1740	0
005 30ms181005 BRCA2-Halo PCNA-iRFP IR tracking	WT G10 -IR	508.1	0.000985197	0.0968976	1762	1
005 30ms181005 BRCA2-Halo PCNA-iRFP IR tracking	WT G10 -IR	509.3	0.856916	0.490544	1771	0
005 30ms181005 BRCA2-Halo PCNA-iRFP IR tracking	WT G10 -IR	510.6	0.00875861	0.237495	1754	2
005 30ms181005 BRCA2-Halo PCNA-iRFP IR tracking	WT G10 -IR	510.8	0.000969768	0.0222189	1768	2
005 30ms181005 BRCA2-Halo PCNA-iRFP IR tracking	WT G10 -IR	515.3	0.772108	0.390225	1831	0
005 30ms181005 BRCA2-Halo PCNA-iRFP IR tracking	WT G10 -IR	520.1	1.57916	0.448723	1910	0
005 30ms181005 BRCA2-Halo PCNA-iRFP IR tracking	WT G10 -IR	521.1	0.527813	0.161046	1924	0
005 30ms181005 BRCA2-Halo PCNA-iRFP IR tracking	WT G10 -IR	525.1	2.45656	0.690642	1953	0
005 30ms181005 BRCA2-Halo PCNA-iRFP IR tracking	WT G10 -IR	527.1	1.55532	0.372353	1976	0
005 30ms181012 BRCA2-Halo PCNA-iRFP IR tracking	WT G10 -IR	5.1	2.12149	0.405547	3	0
005 30ms181012 BRCA2-Halo PCNA-iRFP IR tracking	WT G10 -IR	9.1	0.775165	0.480799	0	0
005 30ms181012 BRCA2-Halo PCNA-iRFP IR tracking	WT G10 -IR	12.1	0.567386	0.252338	0	0
005 30ms181012 BRCA2-Halo PCNA-iRFP IR tracking	WT G10 -IR	21.1	0.806962	0.447737	3	0
005 30ms181012 BRCA2-Halo PCNA-iRFP IR tracking	WT G10 -IR	22.1	1.49097	0.0969079	5	0
005 30ms181012 BRCA2-Halo PCNA-iRFP IR tracking	WT G10 -IR	24.1	2.50895	0.409073	14	0
005 30ms181012 BRCA2-Halo PCNA-iRFP IR tracking	WT G10 -IR	27.3	1.70324	0.366537	10	0
005 30ms181012 BRCA2-Halo PCNA-iRFP IR tracking	WT G10 -IR	29.1	0.877254	0.448758	1	0
005 30ms181012 BRCA2-Halo PCNA-iRFP IR tracking	WT G10 -IR	30.4	0.00873867	0.0846779	38	1
005 30ms181012 BRCA2-Halo PCNA-iRFP IR tracking	WT G10 -IR	32.1	1.44737	0.118135	11	0
005 30ms181012 BRCA2-Halo PCNA-iRFP IR tracking	WT G10 -IR	36.1	1.00112	0.2362	15	0
005 30ms181012 BRCA2-Halo PCNA-iRFP IR tracking	WT G10 -IR	38.1	0.888097	0.46213	17	0
005 30ms181012 BRCA2-Halo PCNA-iRFP IR tracking	WT G10 -IR	38.3	0.41283	0.101968	39	0
005 30ms181012 BRCA2-Halo PCNA-iRFP IR tracking	WT G10 -IR	39.3	0.000158762	0.00856985	14	2
005 30ms181012 BRCA2-Halo PCNA-iRFP IR tracking	WT G10 -IR	41.1	2.25263	0.500705	24	0
005 30ms181012 BRCA2-Halo PCNA-iRFP IR tracking	WT G10 -IR	42.3	1.20673	0.254975	13	0
005 30ms181012 BRCA2-Halo PCNA-iRFP IR tracking	WT G10 -IR	46.8	1.05957	0.1346	37	0
005 30ms181012 BRCA2-Halo PCNA-iRFP IR tracking	WT G10 -IR	48.1	0.248372	0.213322	18	0
005 30ms181012 BRCA2-Halo PCNA-iRFP IR tracking	WT G10 -IR	50.1	2.0841	0.394793	21	0
005 30ms181012 BRCA2-Halo PCNA-iRFP IR tracking	WT G10 -IR	53.1	0.340701	0.321453	61	0
005 30ms181012 BRCA2-Halo PCNA-iRFP IR tracking	WT G10 -IR	53.15	0.541991	0.108206	114	2
005 30ms181012 BRCA2-Halo PCNA-iRFP IR tracking	WT G10 -IR	53.17	1.60076	0.33419	137	0
005 30ms181012 BRCA2-Halo PCNA-iRFP IR tracking	WT G10 -IR	53.6	0.0350727	0.341247	25	1
005 30ms181012 BRCA2-Halo PCNA-iRFP IR tracking	WT G10 -IR	54.2	0.0828947	0.0992038	2	2
005 30ms181012 BRCA2-Halo PCNA-iRFP IR tracking	WT G10 -IR	56.1	10.1815	0.605445	38	0
005 30ms181012 BRCA2-Halo PCNA-iRFP IR tracking	WT G10 -IR	63.1	1.223	0.378205	51	0
005 30ms181012 BRCA2-Halo PCNA-iRFP IR tracking	WT G10 -IR	64.16	0.00420218	0.108672	133	2
005 30ms181012 BRCA2-Halo PCNA-iRFP IR tracking	WT G10 -IR	64.2	0.0077463	0.140733	173	2
005 30ms181012 BRCA2-Halo PCNA-iRFP IR tracking	WT G10 -IR	64.21	0.00256408	0.103892	194	1
005 30ms181012 BRCA2-Halo PCNA-iRFP IR tracking	WT G10 -IR	64.23	0.00305621	0.203792	211	2
005 30ms181012 BRCA2-Halo PCNA-iRFP IR tracking	WT G10 -IR	64.25	0.243784	0.17629	254	2
005 30ms181012 BRCA2-Halo PCNA-iRFP IR tracking	WT G10 -IR	64.4	0.0122046	0.199992	23	2
005 30ms181012 BRCA2-Halo PCNA-iRFP IR tracking	WT G10 -IR	64.6	0.00475114	0.250709	41	2
005 30ms181012 BRCA2-Halo PCNA-iRFP IR tracking	WT G10 -IR	64.9	0.0343344	0.380746	73	1
005 30ms181012 BRCA2-Halo PCNA-iRFP IR tracking	WT G10 -IR	65.6	0.000990928	-0.239066	14	2
005 30ms181012 BRCA2-Halo PCNA-iRFP IR tracking	WT G10 -IR	65.8	0.00489814	0.0845222	46	0
005 30ms181012 BRCA2-Halo PCNA-iRFP IR tracking	WT G10 -IR	70.3	2.23836	0.28358	59	0
005 30ms181012 BRCA2-Halo PCNA-iRFP IR tracking	WT G10 -IR	71.3	3.21522	0.414335	59	0
005 30ms181012 BRCA2-Halo PCNA-iRFP IR tracking	WT G10 -IR	76.1	0.752508	0.634395	0	0
005 30ms181012 BRCA2-Halo PCNA-iRFP IR tracking	WT G10 -IR	76.2	0.0660983	0.39599	19	1
005 30ms181012 BRCA2-Halo PCNA-iRFP IR tracking	WT G10 -IR	76.6	0.0447633	0.60398	42	1
005 30ms181012 BRCA2-Halo PCNA-iRFP IR tracking	WT G10 -IR	77.5	0.00585619	0.196277	39	2
005 30ms181012 BRCA2-Halo PCNA-iRFP IR tracking	WT G10 -IR	81.1	4.19999	0.542148	68	0
005 30ms181012 BRCA2-Halo PCNA-iRFP IR tracking	WT G10 -IR	84.1	0.00245721	0.175663	75	2
005 30ms181012 BRCA2-Halo PCNA-iRFP IR tracking	WT G10 -IR	85.12	0.925684	0.140475	139	1
005 30ms181012 BRCA2-Halo PCNA-iRFP IR tracking	WT G10 -IR	90.1	3.88446	0.561841	74	0
005 30ms181012 BRCA2-Halo PCNA-iRFP IR tracking	WT G10 -IR	91.1	2.58593	0.427041	79	0
005 30ms181012 BRCA2-Halo PCNA-iRFP IR tracking	WT G10 -IR	92.1	1.30103	0.25365	58	0
005 30ms181012 BRCA2-Halo PCNA-iRFP IR tracking	WT G10 -IR	94.1	1.97152	0.309534	74	0
005 30ms181012 BRCA2-Halo PCNA-iRFP IR tracking	WT G10 -IR	95.1	1.22229	0.3068	81	0
005 30ms181012 BRCA2-Halo PCNA-iRFP IR tracking	WT G10 -IR	99.1	0.464879	0.332453	81	0
005 30ms181012 BRCA2-Halo PCNA-iRFP IR tracking	WT G10 -IR	102.1	0.96615	0.203179	69	0
005 30ms181012 BRCA2-Halo PCNA-iRFP IR tracking	WT G10 -IR	103.1	0.963949	0.312898	89	0
005 30ms181012 BRCA2-Halo PCNA-iRFP IR tracking	WT G10 -IR	105.2	0.0774989	0.325563	77	1
005 30ms181012 BRCA2-Halo PCNA-iRFP IR tracking	WT G10 -IR	105.3	0.423621	0.18215	88	0
005 30ms181012 BRCA2-Halo PCNA-iRFP IR tracking	WT G10 -IR	107.1	1.96288	0.299708	75	0
005 30ms181012 BRCA2-Halo PCNA-iRFP IR tracking	WT G10 -IR	110.1	1.72981	0.383068	94	0
005 30ms181012 BRCA2-Halo PCNA-iRFP IR tracking	WT G10 -IR	111.2	0.0101471	0.0957913	100	1
005 30ms181012 BRCA2-Halo PCNA-iRFP IR tracking	WT G10 -IR	111.3	3.36475	0.404611	126	0
005 30ms181012 BRCA2-Halo PCNA-iRFP IR tracking	WT G10 -IR	111.7	0.982358	0.191474	167	0
005 30ms181012 BRCA2-Halo PCNA-iRFP IR tracking	WT G10 -IR	113.1	0.0460001	0.348757	87	1
005 30ms181012 BRCA2-Halo PCNA-iRFP IR tracking	WT G10 -IR	113.3	0.00355531	0.0974285	112	2
005 30ms181012 BRCA2-Halo PCNA-iRFP IR tracking	WT G10 -IR	113.6	0.00152285	0.0640949	160	2
005 30ms181012 BRCA2-Halo PCNA-iRFP IR tracking	WT G10 -IR	120.1	1.46207	0.359514	87	0
005 30ms181012 BRCA2-Halo PCNA-iRFP IR tracking	WT G10 -IR	121.1	0.857587	0.128294	95	0
005 30ms181012 BRCA2-Halo PCNA-iRFP IR tracking	WT G10 -IR	124.5	0.291796	0.32639	104	0
005 30ms181012 BRCA2-Halo PCNA-iRFP IR tracking	WT G10 -IR	126.1	0.223354	0.0403595	83	0
005 30ms181012 BRCA2-Halo PCNA-iRFP IR tracking	WT G10 -IR	127.1	1.19251	0.138332	78	0
005 30ms181012 BRCA2-Halo PCNA-iRFP IR tracking	WT G10 -IR	130.1	1.31967	0.445638	102	0
005 30ms181012 BRCA2-Halo PCNA-iRFP IR tracking	WT G10 -IR	131.1	0.0167611	0.149442	93	1
005 30ms181012 BRCA2-Halo PCNA-iRFP IR tracking	WT G10 -IR	134.1	0.646575	0.175757	104	0
005 30ms181012 BRCA2-Halo PCNA-iRFP IR tracking	WT G10 -IR	135.7	0.485613	0.392911	104	0
005 30ms181012 BRCA2-Halo PCNA-iRFP IR tracking	WT G10 -IR	136.5	0.00694928	0.152766	96	2
005 30ms181012 BRCA2-Halo PCNA-iRFP IR tracking	WT G10 -IR	137.1	2.48647	0.45907	101	0
005 30ms181012 BRCA2-Halo PCNA-iRFP IR tracking	WT G10 -IR	138.1	0.714691	0.276395	94	0
005 30ms181012 BRCA2-Halo PCNA-iRFP IR tracking	WT G10 -IR	139.1	3.72513	0.559983	112	0
005 30ms181012 BRCA2-Halo PCNA-iRFP IR tracking	WT G10 -IR	142.1	0.00191421	0.156204	75	2
005 30ms181012 BRCA2-Halo PCNA-iRFP IR tracking	WT G10 -IR	143.1	0.000306882	-0.117223	102	2
005 30ms181012 BRCA2-Halo PCNA-iRFP IR tracking	WT G10 -IR	149.1	1.11928	0.319384	89	0
005 30ms181012 BRCA2-Halo PCNA-iRFP IR tracking	WT G10 -IR	152.1	2.83171	0.265542	79	0
005 30ms181012 BRCA2-Halo PCNA-iRFP IR tracking	WT G10 -IR	152.4	0.00096008	0.121478	98	2
005 30ms181012 BRCA2-Halo PCNA-iRFP IR tracking	WT G10 -IR	154.4	2.24134	0.440194	121	0
005 30ms181012 BRCA2-Halo PCNA-iRFP IR tracking	WT G10 -IR	154.6	1.30257	0.272076	165	0
005 30ms181012 BRCA2-Halo PCNA-iRFP IR tracking	WT G10 -IR	156.1	1.64297	0.280343	119	0
005 30ms181012 BRCA2-Halo PCNA-iRFP IR tracking	WT G10 -IR	158.1	3.31793	0.511081	76	0
005 30ms181012 BRCA2-Halo PCNA-iRFP IR tracking	WT G10 -IR	158.4	1.90004	0.274765	114	0
005 30ms181012 BRCA2-Halo PCNA-iRFP IR tracking	WT G10 -IR	160.1	1.85062	0.326821	106	0
005 30ms181012 BRCA2-Halo PCNA-iRFP IR tracking	WT G10 -IR	161.1	1.64509	0.414284	121	0
005 30ms181012 BRCA2-Halo PCNA-iRFP IR tracking	WT G10 -IR	165.1	5.06977	0.548246	121	0
005 30ms181012 BRCA2-Halo PCNA-iRFP IR tracking	WT G10 -IR	169.1	0.0781113	0.126757	128	0
005 30ms181012 BRCA2-Halo PCNA-iRFP IR tracking	WT G10 -IR	175.3	3.14463	0.510296	139	0
005 30ms181012 BRCA2-Halo PCNA-iRFP IR tracking	WT G10 -IR	176.1	2.04128	0.287979	129	0
005 30ms181012 BRCA2-Halo PCNA-iRFP IR tracking	WT G10 -IR	180.3	3.98569	0.420117	138	0
005 30ms181012 BRCA2-Halo PCNA-iRFP IR tracking	WT G10 -IR	186.1	0.968986	0.293821	136	0
005 30ms181012 BRCA2-Halo PCNA-iRFP IR tracking	WT G10 -IR	188.1	2.05253	0.343587	137	0
005 30ms181012 BRCA2-Halo PCNA-iRFP IR tracking	WT G10 -IR	190.1	5.89716	0.72602	135	0
005 30ms181012 BRCA2-Halo PCNA-iRFP IR tracking	WT G10 -IR	192.1	6.11259	0.628438	129	0
005 30ms181012 BRCA2-Halo PCNA-iRFP IR tracking	WT G10 -IR	196.1	0.322685	-0.0998088	141	0
005 30ms181012 BRCA2-Halo PCNA-iRFP IR tracking	WT G10 -IR	200.1	1.35772	0.307011	151	0
005 30ms181012 BRCA2-Halo PCNA-iRFP IR tracking	WT G10 -IR	204.1	0.183047	0.115411	138	0
005 30ms181012 BRCA2-Halo PCNA-iRFP IR tracking	WT G10 -IR	210.1	1.08584	0.354686	143	0
005 30ms181012 BRCA2-Halo PCNA-iRFP IR tracking	WT G10 -IR	211.1	3.21917	0.447053	149	0
005 30ms181012 BRCA2-Halo PCNA-iRFP IR tracking	WT G10 -IR	212.5	0.457679	0.204666	139	0
005 30ms181012 BRCA2-Halo PCNA-iRFP IR tracking	WT G10 -IR	218.1	1.04727	0.429727	137	0
005 30ms181012 BRCA2-Halo PCNA-iRFP IR tracking	WT G10 -IR	221.1	2.55783	0.460777	158	0
005 30ms181012 BRCA2-Halo PCNA-iRFP IR tracking	WT G10 -IR	223.1	5.16853	0.697162	167	0
005 30ms181012 BRCA2-Halo PCNA-iRFP IR tracking	WT G10 -IR	224.1	0.549219	0.220233	157	0
005 30ms181012 BRCA2-Halo PCNA-iRFP IR tracking	WT G10 -IR	226.1	3.35887	0.515431	156	0
005 30ms181012 BRCA2-Halo PCNA-iRFP IR tracking	WT G10 -IR	227.4	0.0360407	0.269705	179	1
005 30ms181012 BRCA2-Halo PCNA-iRFP IR tracking	WT G10 -IR	229.5	3.48999	0.400902	121	0
005 30ms181012 BRCA2-Halo PCNA-iRFP IR tracking	WT G10 -IR	229.6	0.0027329	0.0373269	132	2
005 30ms181012 BRCA2-Halo PCNA-iRFP IR tracking	WT G10 -IR	232.2	0.0356701	0.335175	153	1
005 30ms181012 BRCA2-Halo PCNA-iRFP IR tracking	WT G10 -IR	233.3	0.00406337	0.17057	185	2
005 30ms181012 BRCA2-Halo PCNA-iRFP IR tracking	WT G10 -IR	238.1	2.50312	0.285352	173	0
005 30ms181012 BRCA2-Halo PCNA-iRFP IR tracking	WT G10 -IR	239.1	2.9468	0.450925	169	0
005 30ms181012 BRCA2-Halo PCNA-iRFP IR tracking	WT G10 -IR	241.2	0.673261	0.13112	171	0
005 30ms181012 BRCA2-Halo PCNA-iRFP IR tracking	WT G10 -IR	245.5	0.606366	0.320485	178	0
005 30ms181012 BRCA2-Halo PCNA-iRFP IR tracking	WT G10 -IR	246.2	0.00524858	0.361716	178	2
005 30ms181012 BRCA2-Halo PCNA-iRFP IR tracking	WT G10 -IR	246.8	0.00154344	0.192502	221	2
005 30ms181012 BRCA2-Halo PCNA-iRFP IR tracking	WT G10 -IR	247.1	2.79592	0.405477	170	0
005 30ms181012 BRCA2-Halo PCNA-iRFP IR tracking	WT G10 -IR	247.3	1.37333	0.26789	189	0
005 30ms181012 BRCA2-Halo PCNA-iRFP IR tracking	WT G10 -IR	251.1	1.68715	0.445287	165	0
005 30ms181012 BRCA2-Halo PCNA-iRFP IR tracking	WT G10 -IR	254.1	1.67614	0.193213	181	0
005 30ms181012 BRCA2-Halo PCNA-iRFP IR tracking	WT G10 -IR	254.11	0.42821	0.129474	239	0
005 30ms181012 BRCA2-Halo PCNA-iRFP IR tracking	WT G10 -IR	254.13	0.005054	0.037077	257	0
005 30ms181012 BRCA2-Halo PCNA-iRFP IR tracking	WT G10 -IR	254.14	0.00170899	0.0522893	274	1
005 30ms181012 BRCA2-Halo PCNA-iRFP IR tracking	WT G10 -IR	254.16	0.778568	0.318237	304	1
005 30ms181012 BRCA2-Halo PCNA-iRFP IR tracking	WT G10 -IR	254.7	0.00908233	0.17556	206	2
005 30ms181012 BRCA2-Halo PCNA-iRFP IR tracking	WT G10 -IR	254.9	3.12214	0.461098	219	0
005 30ms181012 BRCA2-Halo PCNA-iRFP IR tracking	WT G10 -IR	260.1	3.2508	0.515555	177	0
005 30ms181012 BRCA2-Halo PCNA-iRFP IR tracking	WT G10 -IR	261.1	1.43692	0.369151	179	0
005 30ms181012 BRCA2-Halo PCNA-iRFP IR tracking	WT G10 -IR	263.1	2.70487	0.484063	180	0
005 30ms181012 BRCA2-Halo PCNA-iRFP IR tracking	WT G10 -IR	264.14	0.00366296	-0.112006	120	2
005 30ms181012 BRCA2-Halo PCNA-iRFP IR tracking	WT G10 -IR	264.18	0.0305531	0.0239803	157	2
005 30ms181012 BRCA2-Halo PCNA-iRFP IR tracking	WT G10 -IR	264.3	0.0696199	0.221127	12	1
005 30ms181012 BRCA2-Halo PCNA-iRFP IR tracking	WT G10 -IR	264.8	0.899132	0.374849	38	0
005 30ms181012 BRCA2-Halo PCNA-iRFP IR tracking	WT G10 -IR	264.9	0.00814812	0.234072	49	2
005 30ms181012 BRCA2-Halo PCNA-iRFP IR tracking	WT G10 -IR	268.1	0.495255	-0.0792236	182	0
005 30ms181012 BRCA2-Halo PCNA-iRFP IR tracking	WT G10 -IR	269.1	6.10635	0.805506	180	0
005 30ms181012 BRCA2-Halo PCNA-iRFP IR tracking	WT G10 -IR	270.1	2.66405	0.448092	179	0
005 30ms181012 BRCA2-Halo PCNA-iRFP IR tracking	WT G10 -IR	272.1	7.04825	0.569265	187	0
005 30ms181012 BRCA2-Halo PCNA-iRFP IR tracking	WT G10 -IR	273.1	4.43519	0.593134	186	0
005 30ms181012 BRCA2-Halo PCNA-iRFP IR tracking	WT G10 -IR	276.3	0.0185253	0.308772	152	1
005 30ms181012 BRCA2-Halo PCNA-iRFP IR tracking	WT G10 -IR	276.5	0.0176777	0.478549	167	2
005 30ms181012 BRCA2-Halo PCNA-iRFP IR tracking	WT G10 -IR	281.1	0.00195622	0.0508885	195	1
005 30ms181012 BRCA2-Halo PCNA-iRFP IR tracking	WT G10 -IR	281.3	0.0072091	0.204723	216	1
005 30ms181012 BRCA2-Halo PCNA-iRFP IR tracking	WT G10 -IR	282.1	1.41523	0.209453	194	0
005 30ms181012 BRCA2-Halo PCNA-iRFP IR tracking	WT G10 -IR	284.2	0.0187919	0.429547	192	2
005 30ms181012 BRCA2-Halo PCNA-iRFP IR tracking	WT G10 -IR	287.1	4.23152	0.678975	191	0
005 30ms181012 BRCA2-Halo PCNA-iRFP IR tracking	WT G10 -IR	291.2	0.00330252	0.249595	154	2
005 30ms181012 BRCA2-Halo PCNA-iRFP IR tracking	WT G10 -IR	291.6	0.408173	0.412881	196	0
005 30ms181012 BRCA2-Halo PCNA-iRFP IR tracking	WT G10 -IR	292.5	5.965	0.509063	214	0
005 30ms181012 BRCA2-Halo PCNA-iRFP IR tracking	WT G10 -IR	296.1	0.000218805	0.121829	191	2
005 30ms181012 BRCA2-Halo PCNA-iRFP IR tracking	WT G10 -IR	297.1	0.921599	0.176825	201	0
005 30ms181012 BRCA2-Halo PCNA-iRFP IR tracking	WT G10 -IR	298.3	0.42212	0.108834	202	0
005 30ms181012 BRCA2-Halo PCNA-iRFP IR tracking	WT G10 -IR	302.1	1.56011	0.500964	206	0
005 30ms181012 BRCA2-Halo PCNA-iRFP IR tracking	WT G10 -IR	305.1	0.0073645	0.413725	202	2
005 30ms181012 BRCA2-Halo PCNA-iRFP IR tracking	WT G10 -IR	307.1	1.8744	0.327214	197	0
005 30ms181012 BRCA2-Halo PCNA-iRFP IR tracking	WT G10 -IR	308.2	1.9099	0.385236	217	0
005 30ms181012 BRCA2-Halo PCNA-iRFP IR tracking	WT G10 -IR	309.1	1.13285	0.279766	203	0
005 30ms181012 BRCA2-Halo PCNA-iRFP IR tracking	WT G10 -IR	318.1	1.12164	0.291918	193	0
005 30ms181012 BRCA2-Halo PCNA-iRFP IR tracking	WT G10 -IR	318.2	0.000937095	0.0840928	206	2
005 30ms181012 BRCA2-Halo PCNA-iRFP IR tracking	WT G10 -IR	320.1	1.21001	0.356543	210	0
005 30ms181012 BRCA2-Halo PCNA-iRFP IR tracking	WT G10 -IR	321.1	0.18687	0.189573	212	0
005 30ms181012 BRCA2-Halo PCNA-iRFP IR tracking	WT G10 -IR	322.1	2.31715	0.344637	223	0
005 30ms181012 BRCA2-Halo PCNA-iRFP IR tracking	WT G10 -IR	325.1	0.667281	0.580493	223	0
005 30ms181012 BRCA2-Halo PCNA-iRFP IR tracking	WT G10 -IR	326.1	0.466138	0.359816	227	0
005 30ms181012 BRCA2-Halo PCNA-iRFP IR tracking	WT G10 -IR	327.1	1.80352	0.436208	229	0
005 30ms181012 BRCA2-Halo PCNA-iRFP IR tracking	WT G10 -IR	334.1	0.761325	0.289838	225	0
005 30ms181012 BRCA2-Halo PCNA-iRFP IR tracking	WT G10 -IR	337.2	0.274806	0.479885	226	1
005 30ms181012 BRCA2-Halo PCNA-iRFP IR tracking	WT G10 -IR	340.1	6.31911	0.689202	244	0
005 30ms181012 BRCA2-Halo PCNA-iRFP IR tracking	WT G10 -IR	342.1	5.41649	0.657618	238	0
005 30ms181012 BRCA2-Halo PCNA-iRFP IR tracking	WT G10 -IR	343.1	1.22009	0.335737	241	0
005 30ms181012 BRCA2-Halo PCNA-iRFP IR tracking	WT G10 -IR	344.1	1.77178	0.177087	242	0
005 30ms181012 BRCA2-Halo PCNA-iRFP IR tracking	WT G10 -IR	348.1	0.81536	0.222463	251	0
005 30ms181012 BRCA2-Halo PCNA-iRFP IR tracking	WT G10 -IR	350.1	0.012876	0.132953	183	1
005 30ms181012 BRCA2-Halo PCNA-iRFP IR tracking	WT G10 -IR	350.3	0.0421516	0.221842	209	1
005 30ms181012 BRCA2-Halo PCNA-iRFP IR tracking	WT G10 -IR	350.4	0.00687604	0.10382	221	2
005 30ms181012 BRCA2-Halo PCNA-iRFP IR tracking	WT G10 -IR	360.1	2.72162	0.323111	247	0
005 30ms181012 BRCA2-Halo PCNA-iRFP IR tracking	WT G10 -IR	361.1	0.396443	0.205365	227	0
005 30ms181012 BRCA2-Halo PCNA-iRFP IR tracking	WT G10 -IR	361.3	0.554242	0.058643	256	0
005 30ms181012 BRCA2-Halo PCNA-iRFP IR tracking	WT G10 -IR	363.1	0.5216	0.0507523	253	0
005 30ms181012 BRCA2-Halo PCNA-iRFP IR tracking	WT G10 -IR	368.1	6.18879	0.714988	258	0
005 30ms181012 BRCA2-Halo PCNA-iRFP IR tracking	WT G10 -IR	369.1	1.40518	0.172842	261	0
005 30ms181012 BRCA2-Halo PCNA-iRFP IR tracking	WT G10 -IR	375.2	0.00121081	0.140692	231	2
005 30ms181012 BRCA2-Halo PCNA-iRFP IR tracking	WT G10 -IR	375.3	1.85249	0.589168	254	0
005 30ms181012 BRCA2-Halo PCNA-iRFP IR tracking	WT G10 -IR	377.1	0.44437	0.0915829	258	0
005 30ms181012 BRCA2-Halo PCNA-iRFP IR tracking	WT G10 -IR	379.1	4.14648	0.591869	273	0
005 30ms181012 BRCA2-Halo PCNA-iRFP IR tracking	WT G10 -IR	380.3	0.203854	0.174811	268	0
005 30ms181012 BRCA2-Halo PCNA-iRFP IR tracking	WT G10 -IR	381.1	1.14174	0.344945	238	0
005 30ms181012 BRCA2-Halo PCNA-iRFP IR tracking	WT G10 -IR	383.2	0.00591473	0.117197	269	1
005 30ms181012 BRCA2-Halo PCNA-iRFP IR tracking	WT G10 -IR	387.2	0.0177468	0.1213	228	1
005 30ms181012 BRCA2-Halo PCNA-iRFP IR tracking	WT G10 -IR	387.3	0.00531317	-0.15647	245	2
005 30ms181012 BRCA2-Halo PCNA-iRFP IR tracking	WT G10 -IR	389.3	2.93996	0.44599	267	0
005 30ms181012 BRCA2-Halo PCNA-iRFP IR tracking	WT G10 -IR	391.7	3.67136	0.526098	271	0
005 30ms181012 BRCA2-Halo PCNA-iRFP IR tracking	WT G10 -IR	393.1	0.436621	0.337881	283	0
005 30ms181012 BRCA2-Halo PCNA-iRFP IR tracking	WT G10 -IR	395.1	1.98407	0.401179	291	0
005 30ms181012 BRCA2-Halo PCNA-iRFP IR tracking	WT G10 -IR	398.2	1.38152	0.242975	289	0
005 30ms181012 BRCA2-Halo PCNA-iRFP IR tracking	WT G10 -IR	399.7	0.000903013	-0.134167	275	2
005 30ms181012 BRCA2-Halo PCNA-iRFP IR tracking	WT G10 -IR	400.1	0.595316	0.235622	292	0
005 30ms181012 BRCA2-Halo PCNA-iRFP IR tracking	WT G10 -IR	401.2	1.73594	0.526571	287	0
005 30ms181012 BRCA2-Halo PCNA-iRFP IR tracking	WT G10 -IR	402.1	4.51282	0.563546	292	0
005 30ms181012 BRCA2-Halo PCNA-iRFP IR tracking	WT G10 -IR	403.1	0.541488	0.0744077	297	0
005 30ms181012 BRCA2-Halo PCNA-iRFP IR tracking	WT G10 -IR	403.2	0.01631	0.228046	314	1
005 30ms181012 BRCA2-Halo PCNA-iRFP IR tracking	WT G10 -IR	403.3	0.0113781	0.387783	325	2
005 30ms181012 BRCA2-Halo PCNA-iRFP IR tracking	WT G10 -IR	405.11	0.0497439	0.0276909	286	2
005 30ms181012 BRCA2-Halo PCNA-iRFP IR tracking	WT G10 -IR	405.12	0.0578398	0.0355357	298	0
005 30ms181012 BRCA2-Halo PCNA-iRFP IR tracking	WT G10 -IR	405.13	0.145594	0.354873	313	1
005 30ms181012 BRCA2-Halo PCNA-iRFP IR tracking	WT G10 -IR	405.5	0.0020149	0.0340882	222	2
005 30ms181012 BRCA2-Halo PCNA-iRFP IR tracking	WT G10 -IR	405.7	0.00370894	0.291958	254	2
005 30ms181012 BRCA2-Halo PCNA-iRFP IR tracking	WT G10 -IR	406.1	0.0691195	0.0298779	283	0
005 30ms181012 BRCA2-Halo PCNA-iRFP IR tracking	WT G10 -IR	406.5	0.00388163	0.137535	234	2
005 30ms181012 BRCA2-Halo PCNA-iRFP IR tracking	WT G10 -IR	406.7	0.0162756	0.385583	255	2
005 30ms181012 BRCA2-Halo PCNA-iRFP IR tracking	WT G10 -IR	408.1	1.3074	0.403802	293	0
005 30ms181012 BRCA2-Halo PCNA-iRFP IR tracking	WT G10 -IR	410.3	0.000513304	-0.0226312	311	2
005 30ms181012 BRCA2-Halo PCNA-iRFP IR tracking	WT G10 -IR	411.6	0.00712823	0.254792	288	2
005 30ms181012 BRCA2-Halo PCNA-iRFP IR tracking	WT G10 -IR	413.1	5.05711	0.661251	292	0
005 30ms181012 BRCA2-Halo PCNA-iRFP IR tracking	WT G10 -IR	415.1	5.8289	0.485605	301	0
005 30ms181012 BRCA2-Halo PCNA-iRFP IR tracking	WT G10 -IR	417.2	0.00371663	0.0661691	310	2
005 30ms181012 BRCA2-Halo PCNA-iRFP IR tracking	WT G10 -IR	418.2	0.00212877	0.0516691	291	2
005 30ms181012 BRCA2-Halo PCNA-iRFP IR tracking	WT G10 -IR	421.1	1.83527	0.276441	262	0
005 30ms181012 BRCA2-Halo PCNA-iRFP IR tracking	WT G10 -IR	421.2	0.00337148	0.233109	280	2
005 30ms181012 BRCA2-Halo PCNA-iRFP IR tracking	WT G10 -IR	422.3	2.80528	0.671405	282	0
005 30ms181012 BRCA2-Halo PCNA-iRFP IR tracking	WT G10 -IR	425.2	0.00884166	0.38381	307	2
005 30ms181012 BRCA2-Halo PCNA-iRFP IR tracking	WT G10 -IR	426.2	0.932111	0.253066	286	0
005 30ms181012 BRCA2-Halo PCNA-iRFP IR tracking	WT G10 -IR	426.4	0.41092	0.180237	303	0
005 30ms181012 BRCA2-Halo PCNA-iRFP IR tracking	WT G10 -IR	427.1	2.72575	0.363278	315	0
005 30ms181012 BRCA2-Halo PCNA-iRFP IR tracking	WT G10 -IR	427.5	0.00093156	0.156967	194	2
005 30ms181012 BRCA2-Halo PCNA-iRFP IR tracking	WT G10 -IR	427.6	0.983656	0.277588	260	0
005 30ms181012 BRCA2-Halo PCNA-iRFP IR tracking	WT G10 -IR	427.7	0.0250282	0.421046	292	1
005 30ms181012 BRCA2-Halo PCNA-iRFP IR tracking	WT G10 -IR	429.2	0.00329855	0.0832019	303	2
005 30ms181012 BRCA2-Halo PCNA-iRFP IR tracking	WT G10 -IR	431.1	0.516738	0.0551056	308	0
005 30ms181012 BRCA2-Halo PCNA-iRFP IR tracking	WT G10 -IR	431.2	0.0857349	0.475502	320	1
005 30ms181012 BRCA2-Halo PCNA-iRFP IR tracking	WT G10 -IR	435.1	0.00285557	0.139034	257	2
005 30ms181012 BRCA2-Halo PCNA-iRFP IR tracking	WT G10 -IR	438.1	0.457706	0.565937	294	0
005 30ms181012 BRCA2-Halo PCNA-iRFP IR tracking	WT G10 -IR	438.2	0.00821885	0.353968	242	2
005 30ms181012 BRCA2-Halo PCNA-iRFP IR tracking	WT G10 -IR	439.2	3.4299	0.45886	326	1
005 30ms181012 BRCA2-Halo PCNA-iRFP IR tracking	WT G10 -IR	439.5	3.84497	0.492663	349	0
005 30ms181012 BRCA2-Halo PCNA-iRFP IR tracking	WT G10 -IR	440.1	2.61328	0.414356	323	0
005 30ms181012 BRCA2-Halo PCNA-iRFP IR tracking	WT G10 -IR	441.1	4.4898	0.642056	321	0
005 30ms181012 BRCA2-Halo PCNA-iRFP IR tracking	WT G10 -IR	442.1	1.19819	0.392235	322	0
005 30ms181012 BRCA2-Halo PCNA-iRFP IR tracking	WT G10 -IR	445.1	1.36414	0.573411	326	0
005 30ms181012 BRCA2-Halo PCNA-iRFP IR tracking	WT G10 -IR	454.1	0.837807	0.388914	311	0
005 30ms181012 BRCA2-Halo PCNA-iRFP IR tracking	WT G10 -IR	459.8	0.30679	0.287388	386	0
005 30ms181012 BRCA2-Halo PCNA-iRFP IR tracking	WT G10 -IR	460.1	0.844727	0.25392	329	0
005 30ms181012 BRCA2-Halo PCNA-iRFP IR tracking	WT G10 -IR	462.1	0.00096297	0.213866	323	2
005 30ms181012 BRCA2-Halo PCNA-iRFP IR tracking	WT G10 -IR	465.1	0.782642	0.0401185	351	0
005 30ms181012 BRCA2-Halo PCNA-iRFP IR tracking	WT G10 -IR	469.1	0.943435	0.159912	338	0
005 30ms181012 BRCA2-Halo PCNA-iRFP IR tracking	WT G10 -IR	469.3	0.171599	0.101783	352	0
005 30ms181012 BRCA2-Halo PCNA-iRFP IR tracking	WT G10 -IR	472.5	0.0232731	0.538631	343	2
005 30ms181012 BRCA2-Halo PCNA-iRFP IR tracking	WT G10 -IR	477.11	1.16405	0.251976	358	0
005 30ms181012 BRCA2-Halo PCNA-iRFP IR tracking	WT G10 -IR	477.5	0.608034	0.575548	330	0
005 30ms181012 BRCA2-Halo PCNA-iRFP IR tracking	WT G10 -IR	479.1	2.74133	0.484617	362	0
005 30ms181012 BRCA2-Halo PCNA-iRFP IR tracking	WT G10 -IR	480.1	0.0019464	-0.121125	362	0
005 30ms181012 BRCA2-Halo PCNA-iRFP IR tracking	WT G10 -IR	489.1	7.65889	0.657041	371	0
005 30ms181012 BRCA2-Halo PCNA-iRFP IR tracking	WT G10 -IR	490.1	9.58707	0.612944	374	0
005 30ms181012 BRCA2-Halo PCNA-iRFP IR tracking	WT G10 -IR	500.3	0.712796	0.0997755	367	0
005 30ms181012 BRCA2-Halo PCNA-iRFP IR tracking	WT G10 -IR	501.4	1.58171	0.34759	376	0
005 30ms181012 BRCA2-Halo PCNA-iRFP IR tracking	WT G10 -IR	505.1	1.39025	0.359589	389	0
005 30ms181012 BRCA2-Halo PCNA-iRFP IR tracking	WT G10 -IR	511.1	3.7557	0.529147	396	0
005 30ms181012 BRCA2-Halo PCNA-iRFP IR tracking	WT G10 -IR	512.1	2.71354	0.54212	389	0
005 30ms181012 BRCA2-Halo PCNA-iRFP IR tracking	WT G10 -IR	513.1	1.40768	0.342761	377	0
005 30ms181012 BRCA2-Halo PCNA-iRFP IR tracking	WT G10 -IR	513.6	0.0225833	0.074202	399	1
005 30ms181012 BRCA2-Halo PCNA-iRFP IR tracking	WT G10 -IR	519.1	2.08408	0.532032	407	0
005 30ms181012 BRCA2-Halo PCNA-iRFP IR tracking	WT G10 -IR	522.1	2.12877	0.549936	406	0
005 30ms181012 BRCA2-Halo PCNA-iRFP IR tracking	WT G10 -IR	523.1	3.37915	0.5984	400	0
[truncated: 2,397 more rows]

## Sheet: WT +IR
cellID	condition	tracklet ID	D[um/s2]	Smmss	frame	state
001 30ms181005 BRCA2-Halo PCNA-iRFP IR tracking	WT G10 +IR	9.1	2.94186	0.398603	1	0
001 30ms181005 BRCA2-Halo PCNA-iRFP IR tracking	WT G10 +IR	11.1	0.764094	0.67272	0	0
001 30ms181005 BRCA2-Halo PCNA-iRFP IR tracking	WT G10 +IR	14.1	0.00301914	0.115083	100	1
001 30ms181005 BRCA2-Halo PCNA-iRFP IR tracking	WT G10 +IR	14.3	0.531824	0.300128	32	0
001 30ms181005 BRCA2-Halo PCNA-iRFP IR tracking	WT G10 +IR	14.4	0.00514148	0.211621	44	1
001 30ms181005 BRCA2-Halo PCNA-iRFP IR tracking	WT G10 +IR	14.6	0.0392141	0.108319	66	1
001 30ms181005 BRCA2-Halo PCNA-iRFP IR tracking	WT G10 +IR	16.14	0.141004	0.143611	100	2
001 30ms181005 BRCA2-Halo PCNA-iRFP IR tracking	WT G10 +IR	16.16	0.4032	0.233135	155	1
001 30ms181005 BRCA2-Halo PCNA-iRFP IR tracking	WT G10 +IR	16.17	0.714062	0.326417	186	0
001 30ms181005 BRCA2-Halo PCNA-iRFP IR tracking	WT G10 +IR	16.5	0.0038296	0.0830573	18	1
001 30ms181005 BRCA2-Halo PCNA-iRFP IR tracking	WT G10 +IR	16.6	0.00143506	0.0690181	36	2
001 30ms181005 BRCA2-Halo PCNA-iRFP IR tracking	WT G10 +IR	17.1	0.0283014	0.0452328	6	0
001 30ms181005 BRCA2-Halo PCNA-iRFP IR tracking	WT G10 +IR	18.1	2.16748	0.384295	9	0
001 30ms181005 BRCA2-Halo PCNA-iRFP IR tracking	WT G10 +IR	23.1	0.00172431	0.225493	0	2
001 30ms181005 BRCA2-Halo PCNA-iRFP IR tracking	WT G10 +IR	24.3	0.947186	0.196169	8	0
001 30ms181005 BRCA2-Halo PCNA-iRFP IR tracking	WT G10 +IR	29.1	0.000997243	0.188136	0	2
001 30ms181005 BRCA2-Halo PCNA-iRFP IR tracking	WT G10 +IR	32.1	1.2543	0.452827	8	0
001 30ms181005 BRCA2-Halo PCNA-iRFP IR tracking	WT G10 +IR	45.3	0.0282256	0.525187	2	2
001 30ms181005 BRCA2-Halo PCNA-iRFP IR tracking	WT G10 +IR	46.1	0.496477	0.278044	34	0
001 30ms181005 BRCA2-Halo PCNA-iRFP IR tracking	WT G10 +IR	50.1	2.02791	0.256131	41	0
001 30ms181005 BRCA2-Halo PCNA-iRFP IR tracking	WT G10 +IR	52.2	0.00344265	0.250751	97	2
001 30ms181005 BRCA2-Halo PCNA-iRFP IR tracking	WT G10 +IR	52.22	0.146528	0.204219	116	2
001 30ms181005 BRCA2-Halo PCNA-iRFP IR tracking	WT G10 +IR	52.23	5.45875e-05	-0.135708	135	0
001 30ms181005 BRCA2-Halo PCNA-iRFP IR tracking	WT G10 +IR	52.24	0.00183062	0.0101663	153	1
001 30ms181005 BRCA2-Halo PCNA-iRFP IR tracking	WT G10 +IR	52.26	0.00576598	-0.0869243	169	2
001 30ms181005 BRCA2-Halo PCNA-iRFP IR tracking	WT G10 +IR	53.1	0.131464	0.0825273	44	2
001 30ms181005 BRCA2-Halo PCNA-iRFP IR tracking	WT G10 +IR	56.7	1.14645	0.271285	28	0
001 30ms181005 BRCA2-Halo PCNA-iRFP IR tracking	WT G10 +IR	58.3	0.00387264	0.14229	18	2
001 30ms181005 BRCA2-Halo PCNA-iRFP IR tracking	WT G10 +IR	58.7	1.20613	0.244977	45	0
001 30ms181005 BRCA2-Halo PCNA-iRFP IR tracking	WT G10 +IR	59.5	0.00148034	0.155982	62	2
001 30ms181005 BRCA2-Halo PCNA-iRFP IR tracking	WT G10 +IR	60.5	1.35858	0.099174	44	0
001 30ms181005 BRCA2-Halo PCNA-iRFP IR tracking	WT G10 +IR	63.1	4.08949	0.429983	49	0
001 30ms181005 BRCA2-Halo PCNA-iRFP IR tracking	WT G10 +IR	65.1	0.00364624	0.221681	0	2
001 30ms181005 BRCA2-Halo PCNA-iRFP IR tracking	WT G10 +IR	65.2	0.00221789	0.171098	54	1
001 30ms181005 BRCA2-Halo PCNA-iRFP IR tracking	WT G10 +IR	72.1	2.06669	0.660717	51	0
001 30ms181005 BRCA2-Halo PCNA-iRFP IR tracking	WT G10 +IR	74.11	0.34384	0.252393	154	2
001 30ms181005 BRCA2-Halo PCNA-iRFP IR tracking	WT G10 +IR	74.9	0.00238767	0.0339236	106	2
001 30ms181005 BRCA2-Halo PCNA-iRFP IR tracking	WT G10 +IR	75.4	0.00327059	0.143281	14	2
001 30ms181005 BRCA2-Halo PCNA-iRFP IR tracking	WT G10 +IR	75.7	0.00219303	0.0755803	33	2
001 30ms181005 BRCA2-Halo PCNA-iRFP IR tracking	WT G10 +IR	76.1	0.00269261	0.276367	0	2
001 30ms181005 BRCA2-Halo PCNA-iRFP IR tracking	WT G10 +IR	76.6	0.230987	0.43719	37	1
001 30ms181005 BRCA2-Halo PCNA-iRFP IR tracking	WT G10 +IR	77.3	1.24063	0.265165	8	0
001 30ms181005 BRCA2-Halo PCNA-iRFP IR tracking	WT G10 +IR	77.4	0.00761361	0.338507	21	2
001 30ms181005 BRCA2-Halo PCNA-iRFP IR tracking	WT G10 +IR	79.1	3.73143	0.440945	68	0
001 30ms181005 BRCA2-Halo PCNA-iRFP IR tracking	WT G10 +IR	80.17	1.97489	0.505336	66	2
001 30ms181005 BRCA2-Halo PCNA-iRFP IR tracking	WT G10 +IR	80.3	0.00282421	0.049712	8	1
001 30ms181005 BRCA2-Halo PCNA-iRFP IR tracking	WT G10 +IR	89.1	1.53369	0.332974	79	0
001 30ms181005 BRCA2-Halo PCNA-iRFP IR tracking	WT G10 +IR	90.1	1.76147	0.388549	80	0
001 30ms181005 BRCA2-Halo PCNA-iRFP IR tracking	WT G10 +IR	91.3	1.6174	0.360466	89	0
001 30ms181005 BRCA2-Halo PCNA-iRFP IR tracking	WT G10 +IR	93.1	1.17951	0.40698	79	0
001 30ms181005 BRCA2-Halo PCNA-iRFP IR tracking	WT G10 +IR	101.1	0.313203	0.187676	92	0
001 30ms181005 BRCA2-Halo PCNA-iRFP IR tracking	WT G10 +IR	111.1	1.42559	0.103908	104	0
001 30ms181005 BRCA2-Halo PCNA-iRFP IR tracking	WT G10 +IR	115.2	0.000701167	0.030411	77	2
001 30ms181005 BRCA2-Halo PCNA-iRFP IR tracking	WT G10 +IR	115.3	3.19669	0.4589	107	0
001 30ms181005 BRCA2-Halo PCNA-iRFP IR tracking	WT G10 +IR	119.1	0.000462749	0.0336603	77	2
001 30ms181005 BRCA2-Halo PCNA-iRFP IR tracking	WT G10 +IR	121.7	2.37574	0.380763	96	0
001 30ms181005 BRCA2-Halo PCNA-iRFP IR tracking	WT G10 +IR	126.1	1.29507	0.178137	98	0
001 30ms181005 BRCA2-Halo PCNA-iRFP IR tracking	WT G10 +IR	127.1	1.19547	0.187597	104	0
001 30ms181005 BRCA2-Halo PCNA-iRFP IR tracking	WT G10 +IR	133.1	0.264845	0.109368	115	0
001 30ms181005 BRCA2-Halo PCNA-iRFP IR tracking	WT G10 +IR	135.3	0.0569004	-0.0178531	85	0
001 30ms181005 BRCA2-Halo PCNA-iRFP IR tracking	WT G10 +IR	135.7	1.25077	0.0752168	109	0
001 30ms181005 BRCA2-Halo PCNA-iRFP IR tracking	WT G10 +IR	137.1	0.0027852	0.0782111	0	2
001 30ms181005 BRCA2-Halo PCNA-iRFP IR tracking	WT G10 +IR	137.3	0.00167363	-0.0618645	43	2
001 30ms181005 BRCA2-Halo PCNA-iRFP IR tracking	WT G10 +IR	137.5	0.0325291	0.27424	63	1
001 30ms181005 BRCA2-Halo PCNA-iRFP IR tracking	WT G10 +IR	137.8	0.00240547	0.154332	77	2
001 30ms181005 BRCA2-Halo PCNA-iRFP IR tracking	WT G10 +IR	141.1	1.12972	0.300438	84	0
001 30ms181005 BRCA2-Halo PCNA-iRFP IR tracking	WT G10 +IR	141.3	0.143053	0.133124	125	0
001 30ms181005 BRCA2-Halo PCNA-iRFP IR tracking	WT G10 +IR	142.1	0.348427	0.0897115	120	0
001 30ms181005 BRCA2-Halo PCNA-iRFP IR tracking	WT G10 +IR	144.1	2.61117	0.485257	110	0
001 30ms181005 BRCA2-Halo PCNA-iRFP IR tracking	WT G10 +IR	147.3	1.66645	0.252764	127	0
001 30ms181005 BRCA2-Halo PCNA-iRFP IR tracking	WT G10 +IR	151.1	0.0293529	0.0466275	124	0
001 30ms181005 BRCA2-Halo PCNA-iRFP IR tracking	WT G10 +IR	152.3	1.00935	0.141196	100	0
001 30ms181005 BRCA2-Halo PCNA-iRFP IR tracking	WT G10 +IR	155.1	0.741498	0.220717	104	0
001 30ms181005 BRCA2-Halo PCNA-iRFP IR tracking	WT G10 +IR	157.3	0.8121	0.344035	121	0
001 30ms181005 BRCA2-Halo PCNA-iRFP IR tracking	WT G10 +IR	158.1	2.51182	0.291803	128	0
001 30ms181005 BRCA2-Halo PCNA-iRFP IR tracking	WT G10 +IR	161.3	1.79701	0.294095	132	0
001 30ms181005 BRCA2-Halo PCNA-iRFP IR tracking	WT G10 +IR	166.1	1.28459	0.598623	103	0
001 30ms181005 BRCA2-Halo PCNA-iRFP IR tracking	WT G10 +IR	172.1	1.70508	0.569988	136	0
001 30ms181005 BRCA2-Halo PCNA-iRFP IR tracking	WT G10 +IR	175.4	3.32797	0.404887	155	0
001 30ms181005 BRCA2-Halo PCNA-iRFP IR tracking	WT G10 +IR	176.1	0.341556	0.20948	134	0
001 30ms181005 BRCA2-Halo PCNA-iRFP IR tracking	WT G10 +IR	178.1	0.00400741	0.315523	118	2
001 30ms181005 BRCA2-Halo PCNA-iRFP IR tracking	WT G10 +IR	181.1	0.212996	0.0328013	144	0
001 30ms181005 BRCA2-Halo PCNA-iRFP IR tracking	WT G10 +IR	184.11	1.79398	0.211171	138	0
001 30ms181005 BRCA2-Halo PCNA-iRFP IR tracking	WT G10 +IR	184.2	0.448578	-0.121646	61	0
001 30ms181005 BRCA2-Halo PCNA-iRFP IR tracking	WT G10 +IR	184.3	0.00643189	0.223891	81	2
001 30ms181005 BRCA2-Halo PCNA-iRFP IR tracking	WT G10 +IR	184.5	1.24119	0.145134	113	0
001 30ms181005 BRCA2-Halo PCNA-iRFP IR tracking	WT G10 +IR	186.1	2.45571	0.477584	149	0
001 30ms181005 BRCA2-Halo PCNA-iRFP IR tracking	WT G10 +IR	190.2	0.00623852	0.163413	106	2
001 30ms181005 BRCA2-Halo PCNA-iRFP IR tracking	WT G10 +IR	192.1	0.0469304	0.273434	144	1
001 30ms181005 BRCA2-Halo PCNA-iRFP IR tracking	WT G10 +IR	193.2	0.00632948	0.13788	131	1
001 30ms181005 BRCA2-Halo PCNA-iRFP IR tracking	WT G10 +IR	193.3	2.49449	0.350767	149	0
001 30ms181005 BRCA2-Halo PCNA-iRFP IR tracking	WT G10 +IR	195.1	1.26262	0.279268	152	0
001 30ms181005 BRCA2-Halo PCNA-iRFP IR tracking	WT G10 +IR	197.1	3.31311	0.543188	155	0
001 30ms181005 BRCA2-Halo PCNA-iRFP IR tracking	WT G10 +IR	199.11	0.742995	0.1528	215	0
001 30ms181005 BRCA2-Halo PCNA-iRFP IR tracking	WT G10 +IR	199.3	0.285356	-0.0502264	164	0
001 30ms181005 BRCA2-Halo PCNA-iRFP IR tracking	WT G10 +IR	199.7	0.0380997	-0.00275581	194	0
001 30ms181005 BRCA2-Halo PCNA-iRFP IR tracking	WT G10 +IR	201.1	2.32432	0.592664	159	0
001 30ms181005 BRCA2-Halo PCNA-iRFP IR tracking	WT G10 +IR	202.1	1.04736	0.333141	164	0
001 30ms181005 BRCA2-Halo PCNA-iRFP IR tracking	WT G10 +IR	205.1	0.339939	0.0443854	112	0
001 30ms181005 BRCA2-Halo PCNA-iRFP IR tracking	WT G10 +IR	205.8	0.161866	0.585791	142	1
001 30ms181005 BRCA2-Halo PCNA-iRFP IR tracking	WT G10 +IR	209.4	0.00494671	0.265501	173	2
001 30ms181005 BRCA2-Halo PCNA-iRFP IR tracking	WT G10 +IR	211.1	1.93271	0.453814	163	0
001 30ms181005 BRCA2-Halo PCNA-iRFP IR tracking	WT G10 +IR	212.1	0.00098935	0.0311391	153	2
001 30ms181005 BRCA2-Halo PCNA-iRFP IR tracking	WT G10 +IR	214.2	0.11906	0.534956	146	1
001 30ms181005 BRCA2-Halo PCNA-iRFP IR tracking	WT G10 +IR	214.3	0.3657	-0.190985	165	0
001 30ms181005 BRCA2-Halo PCNA-iRFP IR tracking	WT G10 +IR	218.1	0.000937356	0.121962	161	2
001 30ms181005 BRCA2-Halo PCNA-iRFP IR tracking	WT G10 +IR	219.2	0.0435857	0.284301	174	1
001 30ms181005 BRCA2-Halo PCNA-iRFP IR tracking	WT G10 +IR	221.8	0.00632993	0.280307	157	2
001 30ms181005 BRCA2-Halo PCNA-iRFP IR tracking	WT G10 +IR	221.9	0.00889094	-0.0390752	168	1
001 30ms181005 BRCA2-Halo PCNA-iRFP IR tracking	WT G10 +IR	222.3	1.64731	0.431009	172	0
001 30ms181005 BRCA2-Halo PCNA-iRFP IR tracking	WT G10 +IR	222.7	1.31261	0.227138	199	0
001 30ms181005 BRCA2-Halo PCNA-iRFP IR tracking	WT G10 +IR	223.3	0.00611733	0.385156	145	2
001 30ms181005 BRCA2-Halo PCNA-iRFP IR tracking	WT G10 +IR	225.2	0.00195762	0.173329	167	2
001 30ms181005 BRCA2-Halo PCNA-iRFP IR tracking	WT G10 +IR	226.1	0.318168	-0.0303668	172	0
001 30ms181005 BRCA2-Halo PCNA-iRFP IR tracking	WT G10 +IR	230.1	1.33934	0.272677	172	0
001 30ms181005 BRCA2-Halo PCNA-iRFP IR tracking	WT G10 +IR	233.1	0.627921	0.147886	176	0
001 30ms181005 BRCA2-Halo PCNA-iRFP IR tracking	WT G10 +IR	240.1	0.892163	0.459606	186	0
001 30ms181005 BRCA2-Halo PCNA-iRFP IR tracking	WT G10 +IR	242.1	0.659674	0.326429	186	0
001 30ms181005 BRCA2-Halo PCNA-iRFP IR tracking	WT G10 +IR	246.2	0.00107014	0.0702703	154	2
001 30ms181005 BRCA2-Halo PCNA-iRFP IR tracking	WT G10 +IR	258.1	0.473613	0.0806611	209	0
001 30ms181005 BRCA2-Halo PCNA-iRFP IR tracking	WT G10 +IR	261.2	0.00212694	0.148393	177	2
001 30ms181005 BRCA2-Halo PCNA-iRFP IR tracking	WT G10 +IR	262.1	0.0131429	0.259415	191	2
001 30ms181005 BRCA2-Halo PCNA-iRFP IR tracking	WT G10 +IR	264.1	0.297037	0.0604919	200	0
001 30ms181005 BRCA2-Halo PCNA-iRFP IR tracking	WT G10 +IR	265.1	0.00426726	-0.0187858	174	2
001 30ms181005 BRCA2-Halo PCNA-iRFP IR tracking	WT G10 +IR	265.3	0.00715054	0.311406	192	2
001 30ms181005 BRCA2-Halo PCNA-iRFP IR tracking	WT G10 +IR	268.1	1.72317	0.28994	212	0
001 30ms181005 BRCA2-Halo PCNA-iRFP IR tracking	WT G10 +IR	272.4	0.00110309	0.0627691	217	2
001 30ms181005 BRCA2-Halo PCNA-iRFP IR tracking	WT G10 +IR	273.1	0.00841148	0.341341	216	2
001 30ms181005 BRCA2-Halo PCNA-iRFP IR tracking	WT G10 +IR	274.1	2.76823	0.403991	219	0
001 30ms181005 BRCA2-Halo PCNA-iRFP IR tracking	WT G10 +IR	276.1	4.04364	0.646797	216	0
001 30ms181005 BRCA2-Halo PCNA-iRFP IR tracking	WT G10 +IR	277.2	0.048843	0.345772	232	1
001 30ms181005 BRCA2-Halo PCNA-iRFP IR tracking	WT G10 +IR	279.2	0.00174631	0.0500292	114	2
001 30ms181005 BRCA2-Halo PCNA-iRFP IR tracking	WT G10 +IR	279.6	0.00129381	0.0545485	135	2
001 30ms181005 BRCA2-Halo PCNA-iRFP IR tracking	WT G10 +IR	280.5	1.89708	0.455366	227	0
001 30ms181005 BRCA2-Halo PCNA-iRFP IR tracking	WT G10 +IR	283.2	0.000484722	0.0829175	152	2
001 30ms181005 BRCA2-Halo PCNA-iRFP IR tracking	WT G10 +IR	287.1	1.24497	0.287258	229	0
001 30ms181005 BRCA2-Halo PCNA-iRFP IR tracking	WT G10 +IR	289.1	4.54633	0.6595	237	0
001 30ms181005 BRCA2-Halo PCNA-iRFP IR tracking	WT G10 +IR	290.1	1.1428	0.25486	243	0
001 30ms181005 BRCA2-Halo PCNA-iRFP IR tracking	WT G10 +IR	292.1	0.0424898	0.461961	162	1
001 30ms181005 BRCA2-Halo PCNA-iRFP IR tracking	WT G10 +IR	292.2	0.0119744	0.222304	180	2
001 30ms181005 BRCA2-Halo PCNA-iRFP IR tracking	WT G10 +IR	292.4	0.00418998	0.363881	201	2
001 30ms181005 BRCA2-Halo PCNA-iRFP IR tracking	WT G10 +IR	297.1	6.37374	0.542033	251	0
001 30ms181005 BRCA2-Halo PCNA-iRFP IR tracking	WT G10 +IR	298.1	3.01752	0.531662	285	0
001 30ms181005 BRCA2-Halo PCNA-iRFP IR tracking	WT G10 +IR	300.8	0.0347661	0.516868	231	1
001 30ms181005 BRCA2-Halo PCNA-iRFP IR tracking	WT G10 +IR	301.3	0.00868467	0.161203	260	2
001 30ms181005 BRCA2-Halo PCNA-iRFP IR tracking	WT G10 +IR	312.1	0.29959	0.0345624	265	0
001 30ms181005 BRCA2-Halo PCNA-iRFP IR tracking	WT G10 +IR	316.1	0.834775	0.399589	260	0
001 30ms181005 BRCA2-Halo PCNA-iRFP IR tracking	WT G10 +IR	317.1	0.0856966	0.285517	252	1
001 30ms181005 BRCA2-Halo PCNA-iRFP IR tracking	WT G10 +IR	319.1	1.31586	0.217959	226	0
001 30ms181005 BRCA2-Halo PCNA-iRFP IR tracking	WT G10 +IR	319.4	0.0155252	0.146251	256	2
001 30ms181005 BRCA2-Halo PCNA-iRFP IR tracking	WT G10 +IR	320.1	0.275465	0.101353	261	0
001 30ms181005 BRCA2-Halo PCNA-iRFP IR tracking	WT G10 +IR	322.6	0.172025	0.359467	250	1
001 30ms181005 BRCA2-Halo PCNA-iRFP IR tracking	WT G10 +IR	322.7	0.00693294	0.260727	262	2
001 30ms181005 BRCA2-Halo PCNA-iRFP IR tracking	WT G10 +IR	326.1	4.49049	0.504835	268	0
001 30ms181005 BRCA2-Halo PCNA-iRFP IR tracking	WT G10 +IR	327.2	0.0734268	0.574064	244	1
001 30ms181005 BRCA2-Halo PCNA-iRFP IR tracking	WT G10 +IR	338.2	0.00064127	0.208892	244	2
001 30ms181005 BRCA2-Halo PCNA-iRFP IR tracking	WT G10 +IR	338.4	1.12588	0.494298	280	0
001 30ms181005 BRCA2-Halo PCNA-iRFP IR tracking	WT G10 +IR	340.1	0.00289006	0.232142	284	2
001 30ms181005 BRCA2-Halo PCNA-iRFP IR tracking	WT G10 +IR	345.1	1.80868	0.462466	295	0
001 30ms181005 BRCA2-Halo PCNA-iRFP IR tracking	WT G10 +IR	345.3	0.0124202	0.176753	327	1
001 30ms181005 BRCA2-Halo PCNA-iRFP IR tracking	WT G10 +IR	346.1	0.337037	0.174137	291	0
001 30ms181005 BRCA2-Halo PCNA-iRFP IR tracking	WT G10 +IR	348.1	0.935845	0.166024	293	0
001 30ms181005 BRCA2-Halo PCNA-iRFP IR tracking	WT G10 +IR	351.1	0.00100532	0.0930917	201	2
001 30ms181005 BRCA2-Halo PCNA-iRFP IR tracking	WT G10 +IR	353.1	0.0105453	0.524201	285	2
001 30ms181005 BRCA2-Halo PCNA-iRFP IR tracking	WT G10 +IR	355.2	1.63217	0.278707	310	0
001 30ms181005 BRCA2-Halo PCNA-iRFP IR tracking	WT G10 +IR	357.1	1.79272	0.286537	307	0
001 30ms181005 BRCA2-Halo PCNA-iRFP IR tracking	WT G10 +IR	358.2	1.35965	0.733477	321	0
001 30ms181005 BRCA2-Halo PCNA-iRFP IR tracking	WT G10 +IR	360.11	1.2801	0.206567	376	0
001 30ms181005 BRCA2-Halo PCNA-iRFP IR tracking	WT G10 +IR	360.2	0.00305214	-0.154659	307	2
001 30ms181005 BRCA2-Halo PCNA-iRFP IR tracking	WT G10 +IR	360.9	5.2443	0.477904	359	0
001 30ms181005 BRCA2-Halo PCNA-iRFP IR tracking	WT G10 +IR	363.1	1.61453	0.315571	289	0
001 30ms181005 BRCA2-Halo PCNA-iRFP IR tracking	WT G10 +IR	364.3	2.31657	0.366241	310	0
001 30ms181005 BRCA2-Halo PCNA-iRFP IR tracking	WT G10 +IR	366.2	0.00533546	0.322515	284	2
001 30ms181005 BRCA2-Halo PCNA-iRFP IR tracking	WT G10 +IR	368.3	1.33547	0.175973	321	0
001 30ms181005 BRCA2-Halo PCNA-iRFP IR tracking	WT G10 +IR	369.5	1.19602	0.384169	315	0
001 30ms181005 BRCA2-Halo PCNA-iRFP IR tracking	WT G10 +IR	370.1	0.671255	0.344172	326	0
001 30ms181005 BRCA2-Halo PCNA-iRFP IR tracking	WT G10 +IR	370.3	1.03429	0.422193	345	0
001 30ms181005 BRCA2-Halo PCNA-iRFP IR tracking	WT G10 +IR	371.1	0.214165	0.687738	322	1
001 30ms181005 BRCA2-Halo PCNA-iRFP IR tracking	WT G10 +IR	373.1	5.5245	0.523785	327	0
001 30ms181005 BRCA2-Halo PCNA-iRFP IR tracking	WT G10 +IR	375.2	0.178012	0.413512	309	1
001 30ms181005 BRCA2-Halo PCNA-iRFP IR tracking	WT G10 +IR	375.3	1.18943	0.00044503	322	0
001 30ms181005 BRCA2-Halo PCNA-iRFP IR tracking	WT G10 +IR	379.1	0.485659	0.107331	317	0
001 30ms181005 BRCA2-Halo PCNA-iRFP IR tracking	WT G10 +IR	379.3	0.509968	0.282555	336	0
001 30ms181005 BRCA2-Halo PCNA-iRFP IR tracking	WT G10 +IR	381.3	0.380607	0.655489	341	0
001 30ms181005 BRCA2-Halo PCNA-iRFP IR tracking	WT G10 +IR	383.1	1.18586	0.462108	319	0
001 30ms181005 BRCA2-Halo PCNA-iRFP IR tracking	WT G10 +IR	383.3	0.325012	0.0726377	343	0
001 30ms181005 BRCA2-Halo PCNA-iRFP IR tracking	WT G10 +IR	384.2	0.0083163	0.217072	343	1
001 30ms181005 BRCA2-Halo PCNA-iRFP IR tracking	WT G10 +IR	384.4	0.0186951	0.0742762	361	1
001 30ms181005 BRCA2-Halo PCNA-iRFP IR tracking	WT G10 +IR	384.6	0.00478794	0.114838	385	1
001 30ms181005 BRCA2-Halo PCNA-iRFP IR tracking	WT G10 +IR	389.2	0.988394	0.374687	342	0
001 30ms181005 BRCA2-Halo PCNA-iRFP IR tracking	WT G10 +IR	389.3	0.00400952	-0.0479947	353	1
001 30ms181005 BRCA2-Halo PCNA-iRFP IR tracking	WT G10 +IR	390.1	1.0286	0.273858	215	0
001 30ms181005 BRCA2-Halo PCNA-iRFP IR tracking	WT G10 +IR	390.3	0.0042193	0.0300776	282	1
001 30ms181005 BRCA2-Halo PCNA-iRFP IR tracking	WT G10 +IR	390.6	0.00109746	-0.0798998	302	2
001 30ms181005 BRCA2-Halo PCNA-iRFP IR tracking	WT G10 +IR	391.1	0.0008378	0.0773419	327	2
001 30ms181005 BRCA2-Halo PCNA-iRFP IR tracking	WT G10 +IR	391.11	0.122199	0.0145492	351	0
001 30ms181005 BRCA2-Halo PCNA-iRFP IR tracking	WT G10 +IR	391.16	0.32625	0.274298	378	0
001 30ms181005 BRCA2-Halo PCNA-iRFP IR tracking	WT G10 +IR	391.21	0.597719	0.112042	415	1
001 30ms181005 BRCA2-Halo PCNA-iRFP IR tracking	WT G10 +IR	391.25	0.388736	0.323518	451	1
001 30ms181005 BRCA2-Halo PCNA-iRFP IR tracking	WT G10 +IR	392.4	0.0615906	-0.106949	355	2
001 30ms181005 BRCA2-Halo PCNA-iRFP IR tracking	WT G10 +IR	397.5	0.563514	0.10096	369	0
001 30ms181005 BRCA2-Halo PCNA-iRFP IR tracking	WT G10 +IR	397.6	0.00670816	-0.0430628	384	1
001 30ms181005 BRCA2-Halo PCNA-iRFP IR tracking	WT G10 +IR	400.1	2.83877	0.518298	352	0
001 30ms181005 BRCA2-Halo PCNA-iRFP IR tracking	WT G10 +IR	402.1	0.70866	0.0912697	367	0
001 30ms181005 BRCA2-Halo PCNA-iRFP IR tracking	WT G10 +IR	403.1	0.000623681	0.264457	125	2
001 30ms181005 BRCA2-Halo PCNA-iRFP IR tracking	WT G10 +IR	403.3	0.00142123	0.190252	146	2
001 30ms181005 BRCA2-Halo PCNA-iRFP IR tracking	WT G10 +IR	404.2	0.00641776	0.396852	331	2
001 30ms181005 BRCA2-Halo PCNA-iRFP IR tracking	WT G10 +IR	406.1	0.00282538	0.0332265	303	2
001 30ms181005 BRCA2-Halo PCNA-iRFP IR tracking	WT G10 +IR	406.12	0.00316151	0.0298807	354	2
001 30ms181005 BRCA2-Halo PCNA-iRFP IR tracking	WT G10 +IR	406.2	0.00306701	0.15682	205	2
001 30ms181005 BRCA2-Halo PCNA-iRFP IR tracking	WT G10 +IR	406.4	0.00121184	0.110927	261	2
001 30ms181005 BRCA2-Halo PCNA-iRFP IR tracking	WT G10 +IR	411.3	1.54121	0.430431	380	0
001 30ms181005 BRCA2-Halo PCNA-iRFP IR tracking	WT G10 +IR	412.11	0.494737	0.570652	380	0
001 30ms181005 BRCA2-Halo PCNA-iRFP IR tracking	WT G10 +IR	412.5	0.289353	0.645131	343	1
001 30ms181005 BRCA2-Halo PCNA-iRFP IR tracking	WT G10 +IR	412.9	0.000846526	0.121886	365	2
001 30ms181005 BRCA2-Halo PCNA-iRFP IR tracking	WT G10 +IR	419.2	0.733583	0.149188	395	0
001 30ms181005 BRCA2-Halo PCNA-iRFP IR tracking	WT G10 +IR	419.3	0.00751554	0.0661153	409	1
001 30ms181005 BRCA2-Halo PCNA-iRFP IR tracking	WT G10 +IR	432.3	0.00636421	0.286763	317	2
001 30ms181005 BRCA2-Halo PCNA-iRFP IR tracking	WT G10 +IR	438.1	6.49823	0.628127	408	0
001 30ms181005 BRCA2-Halo PCNA-iRFP IR tracking	WT G10 +IR	440.1	0.0577593	0.356232	401	1
001 30ms181005 BRCA2-Halo PCNA-iRFP IR tracking	WT G10 +IR	442.1	0.00209773	0.257981	319	2
001 30ms181005 BRCA2-Halo PCNA-iRFP IR tracking	WT G10 +IR	444.1	1.79413	0.761753	400	0
001 30ms181005 BRCA2-Halo PCNA-iRFP IR tracking	WT G10 +IR	445.1	1.57408	0.573214	413	0
001 30ms181005 BRCA2-Halo PCNA-iRFP IR tracking	WT G10 +IR	450.2	0.0304416	0.433967	415	1
001 30ms181005 BRCA2-Halo PCNA-iRFP IR tracking	WT G10 +IR	453.1	2.16216	0.436299	409	0
001 30ms181005 BRCA2-Halo PCNA-iRFP IR tracking	WT G10 +IR	454.3	0.464093	0.422287	419	0
001 30ms181005 BRCA2-Halo PCNA-iRFP IR tracking	WT G10 +IR	461.1	7.6264	0.738987	427	0
001 30ms181005 BRCA2-Halo PCNA-iRFP IR tracking	WT G10 +IR	463.1	0.00509356	0.23239	342	2
001 30ms181005 BRCA2-Halo PCNA-iRFP IR tracking	WT G10 +IR	463.2	0.295848	0.60653	432	1
001 30ms181005 BRCA2-Halo PCNA-iRFP IR tracking	WT G10 +IR	464.1	6.70218	0.590845	434	0
001 30ms181005 BRCA2-Halo PCNA-iRFP IR tracking	WT G10 +IR	465.1	1.15638	0.129606	440	0
001 30ms181005 BRCA2-Halo PCNA-iRFP IR tracking	WT G10 +IR	467.2	0.00312724	0.517217	407	2
001 30ms181005 BRCA2-Halo PCNA-iRFP IR tracking	WT G10 +IR	468.1	0.654235	0.0662263	441	0
001 30ms181005 BRCA2-Halo PCNA-iRFP IR tracking	WT G10 +IR	470.1	2.75809	0.43148	450	0
001 30ms181005 BRCA2-Halo PCNA-iRFP IR tracking	WT G10 +IR	472.1	1.28595	0.389302	448	0
001 30ms181005 BRCA2-Halo PCNA-iRFP IR tracking	WT G10 +IR	477.3	1.91446	0.328031	446	0
001 30ms181005 BRCA2-Halo PCNA-iRFP IR tracking	WT G10 +IR	479.2	0.00211377	0.223904	449	2
001 30ms181005 BRCA2-Halo PCNA-iRFP IR tracking	WT G10 +IR	480.1	6.86091	0.635763	454	0
001 30ms181005 BRCA2-Halo PCNA-iRFP IR tracking	WT G10 +IR	489.2	0.0079803	0.576218	465	2
001 30ms181005 BRCA2-Halo PCNA-iRFP IR tracking	WT G10 +IR	491.1	1.09611	0.326127	467	0
001 30ms181005 BRCA2-Halo PCNA-iRFP IR tracking	WT G10 +IR	493.1	3.5893	0.52662	478	0
001 30ms181005 BRCA2-Halo PCNA-iRFP IR tracking	WT G10 +IR	497.1	0.00693922	0.47199	478	2
001 30ms181005 BRCA2-Halo PCNA-iRFP IR tracking	WT G10 +IR	498.2	0.000733089	-0.0601448	423	2
001 30ms181005 BRCA2-Halo PCNA-iRFP IR tracking	WT G10 +IR	498.7	0.0015418	0.335461	470	2
001 30ms181005 BRCA2-Halo PCNA-iRFP IR tracking	WT G10 +IR	500.1	0.00103683	0.00020951	389	2
001 30ms181005 BRCA2-Halo PCNA-iRFP IR tracking	WT G10 +IR	512.4	0.00558439	0.303752	495	2
001 30ms181005 BRCA2-Halo PCNA-iRFP IR tracking	WT G10 +IR	512.5	1.3334	0.550876	515	0
001 30ms181005 BRCA2-Halo PCNA-iRFP IR tracking	WT G10 +IR	513.1	0.373183	-0.0596831	480	0
001 30ms181005 BRCA2-Halo PCNA-iRFP IR tracking	WT G10 +IR	513.2	0.178622	0.2467	494	1
001 30ms181005 BRCA2-Halo PCNA-iRFP IR tracking	WT G10 +IR	519.1	0.734882	0.423977	492	0
001 30ms181005 BRCA2-Halo PCNA-iRFP IR tracking	WT G10 +IR	521.2	0.00208558	0.126256	507	2
001 30ms181005 BRCA2-Halo PCNA-iRFP IR tracking	WT G10 +IR	523.1	0.00772308	0.21006	547	2
001 30ms181005 BRCA2-Halo PCNA-iRFP IR tracking	WT G10 +IR	523.11	0.00575216	0.23552	560	0
001 30ms181005 BRCA2-Halo PCNA-iRFP IR tracking	WT G10 +IR	523.13	0.000362112	-0.0349292	580	2
001 30ms181005 BRCA2-Halo PCNA-iRFP IR tracking	WT G10 +IR	523.21	0.611849	0.118288	615	2
001 30ms181005 BRCA2-Halo PCNA-iRFP IR tracking	WT G10 +IR	523.5	0.0143574	0.328498	488	1
001 30ms181005 BRCA2-Halo PCNA-iRFP IR tracking	WT G10 +IR	523.6	0.000382579	-0.028891	520	2
001 30ms181005 BRCA2-Halo PCNA-iRFP IR tracking	WT G10 +IR	524.2	2.03744	0.349028	513	0
001 30ms181005 BRCA2-Halo PCNA-iRFP IR tracking	WT G10 +IR	525.2	0.00158044	0.228092	531	2
001 30ms181005 BRCA2-Halo PCNA-iRFP IR tracking	WT G10 +IR	526.2	0.00748639	0.254152	489	2
001 30ms181005 BRCA2-Halo PCNA-iRFP IR tracking	WT G10 +IR	530.1	0.88388	0.183207	520	0
001 30ms181005 BRCA2-Halo PCNA-iRFP IR tracking	WT G10 +IR	532.2	2.25135	0.428256	533	0
001 30ms181005 BRCA2-Halo PCNA-iRFP IR tracking	WT G10 +IR	537.2	0.00222354	-0.0557159	536	1
001 30ms181005 BRCA2-Halo PCNA-iRFP IR tracking	WT G10 +IR	543.1	0.102779	0.586351	499	1
001 30ms181005 BRCA2-Halo PCNA-iRFP IR tracking	WT G10 +IR	543.4	0.649606	0.604109	541	0
001 30ms181005 BRCA2-Halo PCNA-iRFP IR tracking	WT G10 +IR	552.2	1.74355	0.33272	564	0
001 30ms181005 BRCA2-Halo PCNA-iRFP IR tracking	WT G10 +IR	554.2	0.00515286	0.197496	536	2
001 30ms181005 BRCA2-Halo PCNA-iRFP IR tracking	WT G10 +IR	559.1	0.240577	0.369989	580	0
001 30ms181005 BRCA2-Halo PCNA-iRFP IR tracking	WT G10 +IR	560.1	0.0156148	0.249302	579	2
001 30ms181005 BRCA2-Halo PCNA-iRFP IR tracking	WT G10 +IR	564.3	0.0147636	0.554109	542	2
001 30ms181005 BRCA2-Halo PCNA-iRFP IR tracking	WT G10 +IR	564.7	0.00298571	0.225585	576	2
001 30ms181005 BRCA2-Halo PCNA-iRFP IR tracking	WT G10 +IR	565.4	1.29691	0.232358	585	0
001 30ms181005 BRCA2-Halo PCNA-iRFP IR tracking	WT G10 +IR	570.1	3.96894	0.682277	594	0
001 30ms181005 BRCA2-Halo PCNA-iRFP IR tracking	WT G10 +IR	573.6	0.01624	0.149247	597	1
001 30ms181005 BRCA2-Halo PCNA-iRFP IR tracking	WT G10 +IR	574.4	0.13229	0.540491	537	1
001 30ms181005 BRCA2-Halo PCNA-iRFP IR tracking	WT G10 +IR	574.7	0.0206711	0.0398235	562	1
001 30ms181005 BRCA2-Halo PCNA-iRFP IR tracking	WT G10 +IR	574.8	0.00167621	0.0284951	582	2
001 30ms181005 BRCA2-Halo PCNA-iRFP IR tracking	WT G10 +IR	575.1	1.00725	0.261415	603	0
001 30ms181005 BRCA2-Halo PCNA-iRFP IR tracking	WT G10 +IR	578.4	0.00102475	0.247206	581	2
001 30ms181005 BRCA2-Halo PCNA-iRFP IR tracking	WT G10 +IR	580.1	1.60529	0.332071	595	0
001 30ms181005 BRCA2-Halo PCNA-iRFP IR tracking	WT G10 +IR	584.3	0.574319	0.040632	570	0
001 30ms181005 BRCA2-Halo PCNA-iRFP IR tracking	WT G10 +IR	585.1	0.79631	0.0755674	606	0
001 30ms181005 BRCA2-Halo PCNA-iRFP IR tracking	WT G10 +IR	587.1	0.148825	0.288578	598	1
001 30ms181005 BRCA2-Halo PCNA-iRFP IR tracking	WT G10 +IR	589.1	0.00185467	0.119444	592	2
001 30ms181005 BRCA2-Halo PCNA-iRFP IR tracking	WT G10 +IR	590.2	2.21542	0.391718	619	0
001 30ms181005 BRCA2-Halo PCNA-iRFP IR tracking	WT G10 +IR	591.1	0.000595268	0.125229	607	2
001 30ms181005 BRCA2-Halo PCNA-iRFP IR tracking	WT G10 +IR	591.2	4.37526	0.583495	624	0
001 30ms181005 BRCA2-Halo PCNA-iRFP IR tracking	WT G10 +IR	593.2	0.00128811	0.0828978	578	2
001 30ms181005 BRCA2-Halo PCNA-iRFP IR tracking	WT G10 +IR	595.2	0.000311388	-0.0172696	505	2
001 30ms181005 BRCA2-Halo PCNA-iRFP IR tracking	WT G10 +IR	595.4	0.000732587	0.0447426	532	2
001 30ms181005 BRCA2-Halo PCNA-iRFP IR tracking	WT G10 +IR	598.1	0.351381	0.0751739	638	0
001 30ms181005 BRCA2-Halo PCNA-iRFP IR tracking	WT G10 +IR	600.1	1.8152	0.357931	633	0
001 30ms181005 BRCA2-Halo PCNA-iRFP IR tracking	WT G10 +IR	601.1	0.0124864	0.555188	611	2
001 30ms181005 BRCA2-Halo PCNA-iRFP IR tracking	WT G10 +IR	601.2	0.00696509	0.279091	555	2
001 30ms181005 BRCA2-Halo PCNA-iRFP IR tracking	WT G10 +IR	601.5	0.00419607	0.168937	576	2
001 30ms181005 BRCA2-Halo PCNA-iRFP IR tracking	WT G10 +IR	602.1	0.3435	0.206587	640	0
001 30ms181005 BRCA2-Halo PCNA-iRFP IR tracking	WT G10 +IR	603.2	0.000843896	0.0576082	628	2
001 30ms181005 BRCA2-Halo PCNA-iRFP IR tracking	WT G10 +IR	604.1	1.28237	0.236199	651	0
001 30ms181005 BRCA2-Halo PCNA-iRFP IR tracking	WT G10 +IR	606.5	0.242924	0.51127	666	0
001 30ms181005 BRCA2-Halo PCNA-iRFP IR tracking	WT G10 +IR	606.7	0.607418	0.467476	684	0
001 30ms181005 BRCA2-Halo PCNA-iRFP IR tracking	WT G10 +IR	606.9	2.07207	0.333251	707	0
001 30ms181005 BRCA2-Halo PCNA-iRFP IR tracking	WT G10 +IR	607.2	0.312501	0.305319	651	0
001 30ms181005 BRCA2-Halo PCNA-iRFP IR tracking	WT G10 +IR	611.1	0.00168947	0.083614	645	2
001 30ms181005 BRCA2-Halo PCNA-iRFP IR tracking	WT G10 +IR	614.1	0.00513495	-0.0323266	641	2
001 30ms181005 BRCA2-Halo PCNA-iRFP IR tracking	WT G10 +IR	619.1	0.821854	0.586901	682	0
001 30ms181005 BRCA2-Halo PCNA-iRFP IR tracking	WT G10 +IR	621.8	0.00254152	0.116604	684	2
001 30ms181005 BRCA2-Halo PCNA-iRFP IR tracking	WT G10 +IR	623.1	1.66833	0.518483	702	0
001 30ms181005 BRCA2-Halo PCNA-iRFP IR tracking	WT G10 +IR	629.1	1.42674	0.662217	703	0
001 30ms181005 BRCA2-Halo PCNA-iRFP IR tracking	WT G10 +IR	631.1	1.37438	0.149798	700	0
001 30ms181005 BRCA2-Halo PCNA-iRFP IR tracking	WT G10 +IR	636.14	1.06028	0.362218	714	2
001 30ms181005 BRCA2-Halo PCNA-iRFP IR tracking	WT G10 +IR	636.5	0.018745	0.199989	629	2
001 30ms181005 BRCA2-Halo PCNA-iRFP IR tracking	WT G10 +IR	636.7	0.0153406	0.317983	651	2
001 30ms181005 BRCA2-Halo PCNA-iRFP IR tracking	WT G10 +IR	636.9	0.00637311	0.180734	665	2
001 30ms181005 BRCA2-Halo PCNA-iRFP IR tracking	WT G10 +IR	639.3	0.376029	-0.0878476	726	0
001 30ms181005 BRCA2-Halo PCNA-iRFP IR tracking	WT G10 +IR	647.1	0.000244549	-0.0433606	652	2
001 30ms181005 BRCA2-Halo PCNA-iRFP IR tracking	WT G10 +IR	649.3	0.00987039	0.326185	672	2
001 30ms181005 BRCA2-Halo PCNA-iRFP IR tracking	WT G10 +IR	649.5	0.00360965	0.167948	704	2
001 30ms181005 BRCA2-Halo PCNA-iRFP IR tracking	WT G10 +IR	653.5	0.891339	0.210514	741	0
001 30ms181005 BRCA2-Halo PCNA-iRFP IR tracking	WT G10 +IR	655.3	1.09536	0.253395	729	0
001 30ms181005 BRCA2-Halo PCNA-iRFP IR tracking	WT G10 +IR	661.1	1.10565	0.234614	757	0
001 30ms181005 BRCA2-Halo PCNA-iRFP IR tracking	WT G10 +IR	662.2	0.00199917	0.0985073	762	2
001 30ms181005 BRCA2-Halo PCNA-iRFP IR tracking	WT G10 +IR	664.1	0.601074	0.496113	751	0
001 30ms181005 BRCA2-Halo PCNA-iRFP IR tracking	WT G10 +IR	667.2	0.0102243	0.327999	739	2
001 30ms181005 BRCA2-Halo PCNA-iRFP IR tracking	WT G10 +IR	667.6	0.00840635	0.503161	770	2
001 30ms181005 BRCA2-Halo PCNA-iRFP IR tracking	WT G10 +IR	670.2	0.00276854	0.235193	740	2
001 30ms181005 BRCA2-Halo PCNA-iRFP IR tracking	WT G10 +IR	671.1	0.734275	0.395213	774	0
001 30ms181005 BRCA2-Halo PCNA-iRFP IR tracking	WT G10 +IR	672.1	0.029519	0.164725	798	1
001 30ms181005 BRCA2-Halo PCNA-iRFP IR tracking	WT G10 +IR	674.1	0.00128174	0.203387	762	2
001 30ms181005 BRCA2-Halo PCNA-iRFP IR tracking	WT G10 +IR	677.2	0.00141227	0.185945	797	2
001 30ms181005 BRCA2-Halo PCNA-iRFP IR tracking	WT G10 +IR	679.5	0.707403	0.2371	807	0
001 30ms181005 BRCA2-Halo PCNA-iRFP IR tracking	WT G10 +IR	679.7	0.058603	0.492304	823	1
001 30ms181005 BRCA2-Halo PCNA-iRFP IR tracking	WT G10 +IR	683.2	0.000639274	0.0887598	715	2
001 30ms181005 BRCA2-Halo PCNA-iRFP IR tracking	WT G10 +IR	683.4	0.00216425	0.188598	742	2
001 30ms181005 BRCA2-Halo PCNA-iRFP IR tracking	WT G10 +IR	685.1	3.85425	0.600803	819	0
001 30ms181005 BRCA2-Halo PCNA-iRFP IR tracking	WT G10 +IR	688.1	0.526757	0.154934	826	0
001 30ms181005 BRCA2-Halo PCNA-iRFP IR tracking	WT G10 +IR	696.1	0.339528	0.0650448	840	0
001 30ms181005 BRCA2-Halo PCNA-iRFP IR tracking	WT G10 +IR	702.1	0.0108953	0.405054	852	2
001 30ms181005 BRCA2-Halo PCNA-iRFP IR tracking	WT G10 +IR	705.2	0.692029	0.436812	842	0
001 30ms181005 BRCA2-Halo PCNA-iRFP IR tracking	WT G10 +IR	707.1	1.43977	0.442671	842	0
001 30ms181005 BRCA2-Halo PCNA-iRFP IR tracking	WT G10 +IR	709.1	0.00506725	0.22146	532	2
001 30ms181005 BRCA2-Halo PCNA-iRFP IR tracking	WT G10 +IR	709.11	0.0277175	0.568029	784	0
001 30ms181005 BRCA2-Halo PCNA-iRFP IR tracking	WT G10 +IR	709.12	0.00858779	0.183282	795	2
001 30ms181005 BRCA2-Halo PCNA-iRFP IR tracking	WT G10 +IR	709.14	0.00492142	0.1886	816	0
001 30ms181005 BRCA2-Halo PCNA-iRFP IR tracking	WT G10 +IR	709.15	0.00322519	0.136347	829	2
001 30ms181005 BRCA2-Halo PCNA-iRFP IR tracking	WT G10 +IR	709.18	0.00146635	0.0570964	856	0
001 30ms181005 BRCA2-Halo PCNA-iRFP IR tracking	WT G10 +IR	709.3	0.00595509	0.20704	556	2
001 30ms181005 BRCA2-Halo PCNA-iRFP IR tracking	WT G10 +IR	709.5	0.00146645	0.14378	725	2
001 30ms181005 BRCA2-Halo PCNA-iRFP IR tracking	WT G10 +IR	709.8	0.00415835	0.0949961	769	1
001 30ms181005 BRCA2-Halo PCNA-iRFP IR tracking	WT G10 +IR	710.2	0.523272	0.283687	878	2
001 30ms181005 BRCA2-Halo PCNA-iRFP IR tracking	WT G10 +IR	712.5	0.00486935	0.0766025	858	2
001 30ms181005 BRCA2-Halo PCNA-iRFP IR tracking	WT G10 +IR	712.7	0.018449	0.494571	870	2
001 30ms181005 BRCA2-Halo PCNA-iRFP IR tracking	WT G10 +IR	717.3	1.76452	0.65129	901	0
001 30ms181005 BRCA2-Halo PCNA-iRFP IR tracking	WT G10 +IR	719.1	1.43505	0.268679	913	0
001 30ms181005 BRCA2-Halo PCNA-iRFP IR tracking	WT G10 +IR	723.2	0.0015007	0.122469	901	2
001 30ms181005 BRCA2-Halo PCNA-iRFP IR tracking	WT G10 +IR	724.1	0.00175048	0.112198	913	2
001 30ms181005 BRCA2-Halo PCNA-iRFP IR tracking	WT G10 +IR	727.1	0.182346	0.224628	907	0
001 30ms181005 BRCA2-Halo PCNA-iRFP IR tracking	WT G10 +IR	731.4	0.0122113	0.502405	904	2
001 30ms181005 BRCA2-Halo PCNA-iRFP IR tracking	WT G10 +IR	732.2	0.0259284	0.195562	944	2
001 30ms181005 BRCA2-Halo PCNA-iRFP IR tracking	WT G10 +IR	739.2	0.0410782	0.254601	965	1
001 30ms181005 BRCA2-Halo PCNA-iRFP IR tracking	WT G10 +IR	746.1	1.04408	0.196368	990	0
001 30ms181005 BRCA2-Halo PCNA-iRFP IR tracking	WT G10 +IR	753.1	0.892662	0.323746	993	0
001 30ms181005 BRCA2-Halo PCNA-iRFP IR tracking	WT G10 +IR	754.1	1.63679	0.293565	998	0
001 30ms181005 BRCA2-Halo PCNA-iRFP IR tracking	WT G10 +IR	756.1	0.000776711	0.254161	890	2
001 30ms181005 BRCA2-Halo PCNA-iRFP IR tracking	WT G10 +IR	758.1	1.56087	0.464655	1013	0
001 30ms181005 BRCA2-Halo PCNA-iRFP IR tracking	WT G10 +IR	760.1	0.724292	0.26266	1018	0
001 30ms181005 BRCA2-Halo PCNA-iRFP IR tracking	WT G10 +IR	764.8	0.00417129	0.205482	1034	2
001 30ms181005 BRCA2-Halo PCNA-iRFP IR tracking	WT G10 +IR	766.1	1.33919	0.363661	1055	0
001 30ms181005 BRCA2-Halo PCNA-iRFP IR tracking	WT G10 +IR	767.1	0.292005	0.10399	1053	0
001 30ms181005 BRCA2-Halo PCNA-iRFP IR tracking	WT G10 +IR	770.1	0.00309068	0.34472	1040	2
001 30ms181005 BRCA2-Halo PCNA-iRFP IR tracking	WT G10 +IR	775.1	1.72957	0.589454	1055	0
001 30ms181005 BRCA2-Halo PCNA-iRFP IR tracking	WT G10 +IR	775.1	0.00236375	0.0368515	1368	2
001 30ms181005 BRCA2-Halo PCNA-iRFP IR tracking	WT G10 +IR	775.4	0.00543778	0.264581	1080	2
001 30ms181005 BRCA2-Halo PCNA-iRFP IR tracking	WT G10 +IR	775.6	0.00175879	0.0499852	1235	2
001 30ms181005 BRCA2-Halo PCNA-iRFP IR tracking	WT G10 +IR	775.8	0.0036401	0.16552	1267	2
001 30ms181005 BRCA2-Halo PCNA-iRFP IR tracking	WT G10 +IR	777.5	0.0120852	0.328981	1107	2
001 30ms181005 BRCA2-Halo PCNA-iRFP IR tracking	WT G10 +IR	782.3	0.545264	0.154222	1124	0
001 30ms181005 BRCA2-Halo PCNA-iRFP IR tracking	WT G10 +IR	783.1	1.095	0.276954	1126	0
001 30ms181005 BRCA2-Halo PCNA-iRFP IR tracking	WT G10 +IR	787.2	0.00525943	0.299974	1156	2
001 30ms181005 BRCA2-Halo PCNA-iRFP IR tracking	WT G10 +IR	788.1	0.000930698	0.0252319	1125	2
001 30ms181005 BRCA2-Halo PCNA-iRFP IR tracking	WT G10 +IR	791.1	0.111265	0.135986	1146	0
001 30ms181005 BRCA2-Halo PCNA-iRFP IR tracking	WT G10 +IR	792.1	1.75731	0.728943	1176	0
001 30ms181005 BRCA2-Halo PCNA-iRFP IR tracking	WT G10 +IR	793.1	0.00487597	0.151535	1102	2
001 30ms181005 BRCA2-Halo PCNA-iRFP IR tracking	WT G10 +IR	793.7	0.0046426	0.21766	1131	2
001 30ms181005 BRCA2-Halo PCNA-iRFP IR tracking	WT G10 +IR	793.9	0.00620159	0.0667686	1145	2
001 30ms181005 BRCA2-Halo PCNA-iRFP IR tracking	WT G10 +IR	800.1	0.186954	0.232575	1192	0
001 30ms181005 BRCA2-Halo PCNA-iRFP IR tracking	WT G10 +IR	804.1	0.0109451	0.216183	1237	2
001 30ms181005 BRCA2-Halo PCNA-iRFP IR tracking	WT G10 +IR	804.8	0.00468519	0.101397	1212	2
001 30ms181005 BRCA2-Halo PCNA-iRFP IR tracking	WT G10 +IR	807.1	0.004867	0.308226	1229	2
001 30ms181005 BRCA2-Halo PCNA-iRFP IR tracking	WT G10 +IR	808.1	0.37725	0.437569	1141	0
001 30ms181005 BRCA2-Halo PCNA-iRFP IR tracking	WT G10 +IR	808.1	6.7163e-05	0.176806	1243	2
001 30ms181005 BRCA2-Halo PCNA-iRFP IR tracking	WT G10 +IR	808.6	0.00263299	0.0349063	1176	2
001 30ms181005 BRCA2-Halo PCNA-iRFP IR tracking	WT G10 +IR	808.8	0.000977395	0.0715503	1213	2
001 30ms181005 BRCA2-Halo PCNA-iRFP IR tracking	WT G10 +IR	809.2	1.63331	0.632401	1234	1
001 30ms181005 BRCA2-Halo PCNA-iRFP IR tracking	WT G10 +IR	809.3	0.0119483	0.298174	1252	2
001 30ms181005 BRCA2-Halo PCNA-iRFP IR tracking	WT G10 +IR	817.1	0.933444	0.395279	1272	0
001 30ms181005 BRCA2-Halo PCNA-iRFP IR tracking	WT G10 +IR	819.1	1.64544	0.337739	1308	0
001 30ms181005 BRCA2-Halo PCNA-iRFP IR tracking	WT G10 +IR	822.1	0.879752	0.345696	1336	0
001 30ms181005 BRCA2-Halo PCNA-iRFP IR tracking	WT G10 +IR	823.2	0.00844794	0.107835	1324	2
001 30ms181005 BRCA2-Halo PCNA-iRFP IR tracking	WT G10 +IR	823.6	0.0130398	0.273495	1348	2
001 30ms181005 BRCA2-Halo PCNA-iRFP IR tracking	WT G10 +IR	827.1	0.00313559	0.261726	1317	2
001 30ms181005 BRCA2-Halo PCNA-iRFP IR tracking	WT G10 +IR	828.1	0.00655318	0.221348	1386	2
001 30ms181005 BRCA2-Halo PCNA-iRFP IR tracking	WT G10 +IR	830.1	0.0153648	0.294395	1376	2
001 30ms181005 BRCA2-Halo PCNA-iRFP IR tracking	WT G10 +IR	835.1	0.00208404	0.00254566	1423	2
001 30ms181005 BRCA2-Halo PCNA-iRFP IR tracking	WT G10 +IR	837.1	1.46761	0.357409	1427	0
001 30ms181005 BRCA2-Halo PCNA-iRFP IR tracking	WT G10 +IR	842.2	0.128836	0.580723	1439	1
001 30ms181005 BRCA2-Halo PCNA-iRFP IR tracking	WT G10 +IR	843.1	1.37186	0.438851	1445	0
001 30ms181005 BRCA2-Halo PCNA-iRFP IR tracking	WT G10 +IR	845.2	0.00237952	0.315627	1453	2
001 30ms181005 BRCA2-Halo PCNA-iRFP IR tracking	WT G10 +IR	850.1	0.0012023	0.0879295	1401	2
001 30ms181005 BRCA2-Halo PCNA-iRFP IR tracking	WT G10 +IR	851.14	0.00275319	0.194636	1566	2
001 30ms181005 BRCA2-Halo PCNA-iRFP IR tracking	WT G10 +IR	851.3	0.00406224	0.126364	1493	2
001 30ms181005 BRCA2-Halo PCNA-iRFP IR tracking	WT G10 +IR	851.7	0.00153114	0.0157999	1523	2
001 30ms181005 BRCA2-Halo PCNA-iRFP IR tracking	WT G10 +IR	851.9	0.00477441	0.0961427	1540	2
001 30ms181005 BRCA2-Halo PCNA-iRFP IR tracking	WT G10 +IR	852.1	0.0478428	0.425254	1461	2
001 30ms181005 BRCA2-Halo PCNA-iRFP IR tracking	WT G10 +IR	853.5	1.04422	0.263043	1496	0
001 30ms181005 BRCA2-Halo PCNA-iRFP IR tracking	WT G10 +IR	853.8	0.0333898	0.243905	1523	1
001 30ms181005 BRCA2-Halo PCNA-iRFP IR tracking	WT G10 +IR	854.3	1.70988	0.275633	1509	0
001 30ms181005 BRCA2-Halo PCNA-iRFP IR tracking	WT G10 +IR	856.2	1.56168	0.502028	1508	0
001 30ms181005 BRCA2-Halo PCNA-iRFP IR tracking	WT G10 +IR	857.1	0.00214846	0.335053	1510	2
001 30ms181005 BRCA2-Halo PCNA-iRFP IR tracking	WT G10 +IR	860.1	0.00240281	0.275659	1520	2
001 30ms181005 BRCA2-Halo PCNA-iRFP IR tracking	WT G10 +IR	860.12	0.00337649	0.156729	1578	2
001 30ms181005 BRCA2-Halo PCNA-iRFP IR tracking	WT G10 +IR	862.1	0.203198	0.00992784	1533	0
001 30ms181005 BRCA2-Halo PCNA-iRFP IR tracking	WT G10 +IR	864.2	0.00127458	0.138289	1514	2
001 30ms181005 BRCA2-Halo PCNA-iRFP IR tracking	WT G10 +IR	870.4	0.0888351	0.358279	1565	1
001 30ms181005 BRCA2-Halo PCNA-iRFP IR tracking	WT G10 +IR	874.3	0.843762	0.094508	1597	0
001 30ms181005 BRCA2-Halo PCNA-iRFP IR tracking	WT G10 +IR	875.3	0.0256094	0.371468	1594	1
001 30ms181005 BRCA2-Halo PCNA-iRFP IR tracking	WT G10 +IR	876.3	0.714513	0.620445	1588	0
001 30ms181005 BRCA2-Halo PCNA-iRFP IR tracking	WT G10 +IR	879.1	0.00267286	0.275633	1495	2
001 30ms181005 BRCA2-Halo PCNA-iRFP IR tracking	WT G10 +IR	879.4	0.00231012	0.233215	1515	2
001 30ms181005 BRCA2-Halo PCNA-iRFP IR tracking	WT G10 +IR	881.1	0.488913	0.571324	1619	0
001 30ms181005 BRCA2-Halo PCNA-iRFP IR tracking	WT G10 +IR	885.3	0.00197585	0.045303	1642	2
001 30ms181005 BRCA2-Halo PCNA-iRFP IR tracking	WT G10 +IR	886.1	0.0012542	0.19241	1624	2
001 30ms181005 BRCA2-Halo PCNA-iRFP IR tracking	WT G10 +IR	888.2	0.320497	0.613808	1663	1
001 30ms181005 BRCA2-Halo PCNA-iRFP IR tracking	WT G10 +IR	889.2	0.0482801	0.437745	1675	1
001 30ms181005 BRCA2-Halo PCNA-iRFP IR tracking	WT G10 +IR	890.1	0.00112518	0.127122	1665	2
001 30ms181005 BRCA2-Halo PCNA-iRFP IR tracking	WT G10 +IR	891.1	0.000186464	0.0389436	1683	2
001 30ms181005 BRCA2-Halo PCNA-iRFP IR tracking	WT G10 +IR	894.2	0.00452967	0.260968	1674	2
001 30ms181005 BRCA2-Halo PCNA-iRFP IR tracking	WT G10 +IR	896.1	0.00160528	0.102045	1666	2
001 30ms181005 BRCA2-Halo PCNA-iRFP IR tracking	WT G10 +IR	897.1	0.000206042	0.0366302	1713	2
001 30ms181005 BRCA2-Halo PCNA-iRFP IR tracking	WT G10 +IR	901.1	1.3647	0.371646	1717	0
001 30ms181005 BRCA2-Halo PCNA-iRFP IR tracking	WT G10 +IR	901.5	0.3394	0.302539	1751	0
001 30ms181005 BRCA2-Halo PCNA-iRFP IR tracking	WT G10 +IR	902.2	0.01103	0.134152	1757	2
001 30ms181005 BRCA2-Halo PCNA-iRFP IR tracking	WT G10 +IR	904.1	0.000377853	0.148379	1783	2
001 30ms181005 BRCA2-Halo PCNA-iRFP IR tracking	WT G10 +IR	905.1	0.00465634	0.314963	1754	2
001 30ms181005 BRCA2-Halo PCNA-iRFP IR tracking	WT G10 +IR	905.2	0.023107	0.410614	1790	1
001 30ms181005 BRCA2-Halo PCNA-iRFP IR tracking	WT G10 +IR	905.3	0.00486274	0.167684	1802	2
001 30ms181005 BRCA2-Halo PCNA-iRFP IR tracking	WT G10 +IR	906.1	0.0009515	-0.0508727	1780	2
001 30ms181005 BRCA2-Halo PCNA-iRFP IR tracking	WT G10 +IR	907.3	0.00368744	0.280163	1684	2
001 30ms181005 BRCA2-Halo PCNA-iRFP IR tracking	WT G10 +IR	908.1	0.00359738	0.297861	1831	2
001 30ms181005 BRCA2-Halo PCNA-iRFP IR tracking	WT G10 +IR	908.3	0.0030248	0.184308	1895	2
001 30ms181005 BRCA2-Halo PCNA-iRFP IR tracking	WT G10 +IR	911.1	0.621804	0.336994	1859	0
001 30ms181005 BRCA2-Halo PCNA-iRFP IR tracking	WT G10 +IR	912.1	0.00338188	0.119411	1803	2
001 30ms181005 BRCA2-Halo PCNA-iRFP IR tracking	WT G10 +IR	912.3	0.00494173	0.0833653	1853	2
001 30ms181005 BRCA2-Halo PCNA-iRFP IR tracking	WT G10 +IR	916.2	0.119814	0.367668	1921	1
001 30ms181005 BRCA2-Halo PCNA-iRFP IR tracking	WT G10 +IR	917.1	0.00066472	0.094958	1863	2
001 30ms181005 BRCA2-Halo PCNA-iRFP IR tracking	WT G10 +IR	919.2	0.00165282	0.0266171	1939	2
001 30ms181005 BRCA2-Halo PCNA-iRFP IR tracking	WT G10 +IR	920.1	0.00058923	0.0812503	1942	2
001 30ms181005 BRCA2-Halo PCNA-iRFP IR tracking	WT G10 +IR	921.2	0.0605393	0.342501	1945	1
001 30ms181005 BRCA2-Halo PCNA-iRFP IR tracking	WT G10 +IR	922.1	0.910448	0.123724	1956	0
001 30ms181005 BRCA2-Halo PCNA-iRFP IR tracking	WT G10 +IR	924.1	0.00312467	0.240146	1957	2
001 30ms181005 BRCA2-Halo PCNA-iRFP IR tracking	WT G10 +IR	925.1	0.759122	0.447995	1969	0
001 30ms181005 BRCA2-Halo PCNA-iRFP IR tracking	WT G10 +IR	927.1	1.02826	0.508734	1985	0
001 30ms181012 BRCA2-Halo PCNA-iRFP IR tracking	WT G10 +IR	0.2	0.0134399	0.308993	8	2
001 30ms181012 BRCA2-Halo PCNA-iRFP IR tracking	WT G10 +IR	12.7	0.0356989	0.23959	27	1
001 30ms181012 BRCA2-Halo PCNA-iRFP IR tracking	WT G10 +IR	18.1	1.06724	0.259783	8	0
001 30ms181012 BRCA2-Halo PCNA-iRFP IR tracking	WT G10 +IR	19.1	0.0021368	0.0661469	0	2
001 30ms181012 BRCA2-Halo PCNA-iRFP IR tracking	WT G10 +IR	21.4	7.06843	0.593483	10	0
001 30ms181012 BRCA2-Halo PCNA-iRFP IR tracking	WT G10 +IR	22.1	0.00468612	0.1673	0	2
001 30ms181012 BRCA2-Halo PCNA-iRFP IR tracking	WT G10 +IR	25.1	0.00584544	0.346403	0	2
001 30ms181012 BRCA2-Halo PCNA-iRFP IR tracking	WT G10 +IR	27.2	0.00901848	0.189734	4	2
001 30ms181012 BRCA2-Halo PCNA-iRFP IR tracking	WT G10 +IR	29.1	2.21456	0.244462	18	0
001 30ms181012 BRCA2-Halo PCNA-iRFP IR tracking	WT G10 +IR	29.4	1.27548	0.392045	42	0
001 30ms181012 BRCA2-Halo PCNA-iRFP IR tracking	WT G10 +IR	29.8	0.000991119	0.0763584	67	2
001 30ms181012 BRCA2-Halo PCNA-iRFP IR tracking	WT G10 +IR	30.5	0.000796731	0.159472	39	2
001 30ms181012 BRCA2-Halo PCNA-iRFP IR tracking	WT G10 +IR	31.4	0.000759562	0.0735962	10	2
001 30ms181012 BRCA2-Halo PCNA-iRFP IR tracking	WT G10 +IR	36.2	0.0605672	-0.0504623	7	0
001 30ms181012 BRCA2-Halo PCNA-iRFP IR tracking	WT G10 +IR	37.4	0.01025	0.221787	13	1
001 30ms181012 BRCA2-Halo PCNA-iRFP IR tracking	WT G10 +IR	40.3	0.0122443	0.102083	15	2
001 30ms181012 BRCA2-Halo PCNA-iRFP IR tracking	WT G10 +IR	41.3	0.00342814	0.133407	13	1
001 30ms181012 BRCA2-Halo PCNA-iRFP IR tracking	WT G10 +IR	41.4	0.00129945	0.0696591	25	2
001 30ms181012 BRCA2-Halo PCNA-iRFP IR tracking	WT G10 +IR	43.2	1.93058	0.453123	29	0
001 30ms181012 BRCA2-Halo PCNA-iRFP IR tracking	WT G10 +IR	44.1	0.00327623	0.193514	26	2
001 30ms181012 BRCA2-Halo PCNA-iRFP IR tracking	WT G10 +IR	45.2	0.00725646	0.201217	15	1
001 30ms181012 BRCA2-Halo PCNA-iRFP IR tracking	WT G10 +IR	47.12	0.0291216	0.417321	87	2
001 30ms181012 BRCA2-Halo PCNA-iRFP IR tracking	WT G10 +IR	47.7	0.00642046	0.276844	48	2
001 30ms181012 BRCA2-Halo PCNA-iRFP IR tracking	WT G10 +IR	48.1	0.00235987	0.384545	0	2
001 30ms181012 BRCA2-Halo PCNA-iRFP IR tracking	WT G10 +IR	48.3	0.00201634	0.304222	26	2
001 30ms181012 BRCA2-Halo PCNA-iRFP IR tracking	WT G10 +IR	50.4	0.000730013	-0.0150728	17	2
001 30ms181012 BRCA2-Halo PCNA-iRFP IR tracking	WT G10 +IR	50.5	0.0598163	0.468481	32	1
001 30ms181012 BRCA2-Halo PCNA-iRFP IR tracking	WT G10 +IR	56.4	0.000485924	-0.12299	13	2
001 30ms181012 BRCA2-Halo PCNA-iRFP IR tracking	WT G10 +IR	57.4	0.0243684	0.342208	33	2
001 30ms181012 BRCA2-Halo PCNA-iRFP IR tracking	WT G10 +IR	60.1	0.0762395	0.466444	39	1
001 30ms181012 BRCA2-Halo PCNA-iRFP IR tracking	WT G10 +IR	63.1	0.000825718	-0.0279445	46	2
001 30ms181012 BRCA2-Halo PCNA-iRFP IR tracking	WT G10 +IR	64.2	0.128579	0.500338	28	1
001 30ms181012 BRCA2-Halo PCNA-iRFP IR tracking	WT G10 +IR	65.3	0.151371	0.480276	3	1
001 30ms181012 BRCA2-Halo PCNA-iRFP IR tracking	WT G10 +IR	65.5	0.0928222	0.577797	41	1
001 30ms181012 BRCA2-Halo PCNA-iRFP IR tracking	WT G10 +IR	66.2	0.00552797	0.11418	53	2
001 30ms181012 BRCA2-Halo PCNA-iRFP IR tracking	WT G10 +IR	67.1	0.778495	-0.0540274	53	0
001 30ms181012 BRCA2-Halo PCNA-iRFP IR tracking	WT G10 +IR	69.2	0.223027	0.685318	51	1
001 30ms181012 BRCA2-Halo PCNA-iRFP IR tracking	WT G10 +IR	73.2	0.075657	0.368831	31	1
001 30ms181012 BRCA2-Halo PCNA-iRFP IR tracking	WT G10 +IR	73.5	1.46708	0.377735	45	0
001 30ms181012 BRCA2-Halo PCNA-iRFP IR tracking	WT G10 +IR	75.4	0.00502738	0.169942	9	2
001 30ms181012 BRCA2-Halo PCNA-iRFP IR tracking	WT G10 +IR	75.6	4.48399e-05	0.0769163	178	2
001 30ms181012 BRCA2-Halo PCNA-iRFP IR tracking	WT G10 +IR	76.1	0.00546368	0.358217	45	2
001 30ms181012 BRCA2-Halo PCNA-iRFP IR tracking	WT G10 +IR	80.3	0.000208692	0.038489	48	2
001 30ms181012 BRCA2-Halo PCNA-iRFP IR tracking	WT G10 +IR	81.1	0.00169528	-0.0865282	0	2
001 30ms181012 BRCA2-Halo PCNA-iRFP IR tracking	WT G10 +IR	84.1	0.00398081	0.318688	0	2
001 30ms181012 BRCA2-Halo PCNA-iRFP IR tracking	WT G10 +IR	84.3	0.260821	0.469796	48	1
001 30ms181012 BRCA2-Halo PCNA-iRFP IR tracking	WT G10 +IR	84.4	1.06186	0.715258	59	0
001 30ms181012 BRCA2-Halo PCNA-iRFP IR tracking	WT G10 +IR	90.1	0.00218739	0.218506	42	2
001 30ms181012 BRCA2-Halo PCNA-iRFP IR tracking	WT G10 +IR	94.4	0.00355373	0.0845124	44	2
001 30ms181012 BRCA2-Halo PCNA-iRFP IR tracking	WT G10 +IR	95.1	0.000926329	0.133072	0	2
001 30ms181012 BRCA2-Halo PCNA-iRFP IR tracking	WT G10 +IR	97.3	0.00232321	0.159795	37	2
001 30ms181012 BRCA2-Halo PCNA-iRFP IR tracking	WT G10 +IR	97.5	0.00299089	0.210538	68	2
001 30ms181012 BRCA2-Halo PCNA-iRFP IR tracking	WT G10 +IR	99.3	0.471513	0.149034	75	0
001 30ms181012 BRCA2-Halo PCNA-iRFP IR tracking	WT G10 +IR	101.1	4.87638	0.514289	82	0
001 30ms181012 BRCA2-Halo PCNA-iRFP IR tracking	WT G10 +IR	102.1	0.782016	0.161875	89	0
001 30ms181012 BRCA2-Halo PCNA-iRFP IR tracking	WT G10 +IR	104.1	0.00129253	0.251109	0	2
001 30ms181012 BRCA2-Halo PCNA-iRFP IR tracking	WT G10 +IR	107.1	0.00095702	0.107686	0	2
001 30ms181012 BRCA2-Halo PCNA-iRFP IR tracking	WT G10 +IR	108.11	0.167208	0.0306105	59	2
001 30ms181012 BRCA2-Halo PCNA-iRFP IR tracking	WT G10 +IR	108.12	0.00912248	0.270767	81	1
001 30ms181012 BRCA2-Halo PCNA-iRFP IR tracking	WT G10 +IR	110.1	0.00158729	0.258341	0	2
001 30ms181012 BRCA2-Halo PCNA-iRFP IR tracking	WT G10 +IR	113.4	0.00968162	0.0510215	107	1
001 30ms181012 BRCA2-Halo PCNA-iRFP IR tracking	WT G10 +IR	113.6	0.00689872	0.320211	121	2
001 30ms181012 BRCA2-Halo PCNA-iRFP IR tracking	WT G10 +IR	115.1	0.39309	-0.0108881	97	0
001 30ms181012 BRCA2-Halo PCNA-iRFP IR tracking	WT G10 +IR	119.22	0.00605843	0.154453	213	1
001 30ms181012 BRCA2-Halo PCNA-iRFP IR tracking	WT G10 +IR	119.5	0.125977	0.441707	113	1
001 30ms181012 BRCA2-Halo PCNA-iRFP IR tracking	WT G10 +IR	121.1	0.0059633	0.095897	93	2
001 30ms181012 BRCA2-Halo PCNA-iRFP IR tracking	WT G10 +IR	123.1	0.0118065	0.244377	77	2
001 30ms181012 BRCA2-Halo PCNA-iRFP IR tracking	WT G10 +IR	125.1	0.00567322	0.335258	88	2
001 30ms181012 BRCA2-Halo PCNA-iRFP IR tracking	WT G10 +IR	126.1	0.00193523	0.299639	0	2
001 30ms181012 BRCA2-Halo PCNA-iRFP IR tracking	WT G10 +IR	126.5	0.000664702	0.0411521	84	2
001 30ms181012 BRCA2-Halo PCNA-iRFP IR tracking	WT G10 +IR	129.1	0.0217541	0.122016	102	1
001 30ms181012 BRCA2-Halo PCNA-iRFP IR tracking	WT G10 +IR	131.1	0.0686616	0.177453	11	1
001 30ms181012 BRCA2-Halo PCNA-iRFP IR tracking	WT G10 +IR	131.12	0.442135	0.653911	78	2
001 30ms181012 BRCA2-Halo PCNA-iRFP IR tracking	WT G10 +IR	131.14	0.853402	0.72575	97	1
001 30ms181012 BRCA2-Halo PCNA-iRFP IR tracking	WT G10 +IR	131.16	0.0516209	0.00138989	114	0
001 30ms181012 BRCA2-Halo PCNA-iRFP IR tracking	WT G10 +IR	131.8	0.665493	0.638642	57	0
001 30ms181012 BRCA2-Halo PCNA-iRFP IR tracking	WT G10 +IR	133.2	0.110234	0.396674	92	1
001 30ms181012 BRCA2-Halo PCNA-iRFP IR tracking	WT G10 +IR	138.2	0.00263636	0.227504	94	2
001 30ms181012 BRCA2-Halo PCNA-iRFP IR tracking	WT G10 +IR	141.2	0.00744143	0.167658	15	2
001 30ms181012 BRCA2-Halo PCNA-iRFP IR tracking	WT G10 +IR	141.4	0.00327333	0.0999443	41	2
001 30ms181012 BRCA2-Halo PCNA-iRFP IR tracking	WT G10 +IR	143.9	0.00443541	0.302203	70	2
001 30ms181012 BRCA2-Halo PCNA-iRFP IR tracking	WT G10 +IR	147.2	0.0113706	0.120668	98	1
001 30ms181012 BRCA2-Halo PCNA-iRFP IR tracking	WT G10 +IR	149.3	0.334872	0.572385	118	0
001 30ms181012 BRCA2-Halo PCNA-iRFP IR tracking	WT G10 +IR	150.1	2.83188	0.528331	120	0
001 30ms181012 BRCA2-Halo PCNA-iRFP IR tracking	WT G10 +IR	151.1	0.545297	0.393724	123	0
001 30ms181012 BRCA2-Halo PCNA-iRFP IR tracking	WT G10 +IR	152.3	0.000294435	0.0385312	18	2
001 30ms181012 BRCA2-Halo PCNA-iRFP IR tracking	WT G10 +IR	152.5	4.63925e-06	0.0158533	59	2
001 30ms181012 BRCA2-Halo PCNA-iRFP IR tracking	WT G10 +IR	156.12	0.0114557	0.264082	120	1
001 30ms181012 BRCA2-Halo PCNA-iRFP IR tracking	WT G10 +IR	156.3	0.0069895	0.174295	53	1
001 30ms181012 BRCA2-Halo PCNA-iRFP IR tracking	WT G10 +IR	156.4	0.0140041	0.245185	65	2
001 30ms181012 BRCA2-Halo PCNA-iRFP IR tracking	WT G10 +IR	156.5	0.00692989	-0.0130394	80	1
001 30ms181012 BRCA2-Halo PCNA-iRFP IR tracking	WT G10 +IR	165.2	0.208646	0.43473	89	0
001 30ms181012 BRCA2-Halo PCNA-iRFP IR tracking	WT G10 +IR	165.6	0.136583	0.423253	111	1
001 30ms181012 BRCA2-Halo PCNA-iRFP IR tracking	WT G10 +IR	169.3	0.718231	0.376109	140	0
001 30ms181012 BRCA2-Halo PCNA-iRFP IR tracking	WT G10 +IR	175.4	0.0107569	0.149071	151	1
001 30ms181012 BRCA2-Halo PCNA-iRFP IR tracking	WT G10 +IR	176.5	1.12832	0.614656	145	0
001 30ms181012 BRCA2-Halo PCNA-iRFP IR tracking	WT G10 +IR	178.6	0.0351355	-0.0431809	142	0
001 30ms181012 BRCA2-Halo PCNA-iRFP IR tracking	WT G10 +IR	179.2	2.33195	0.267879	145	0
001 30ms181012 BRCA2-Halo PCNA-iRFP IR tracking	WT G10 +IR	180.1	0.00514568	0.0619182	150	1
001 30ms181012 BRCA2-Halo PCNA-iRFP IR tracking	WT G10 +IR	183.3	0.680944	0.17578	121	0
001 30ms181012 BRCA2-Halo PCNA-iRFP IR tracking	WT G10 +IR	183.4	0.119304	0.420649	148	1
001 30ms181012 BRCA2-Halo PCNA-iRFP IR tracking	WT G10 +IR	188.1	0.00101213	0.121018	150	2
001 30ms181012 BRCA2-Halo PCNA-iRFP IR tracking	WT G10 +IR	189.2	0.0140301	0.185683	44	1
001 30ms181012 BRCA2-Halo PCNA-iRFP IR tracking	WT G10 +IR	189.4	0.115239	0.467046	58	1
001 30ms181012 BRCA2-Halo PCNA-iRFP IR tracking	WT G10 +IR	189.6	0.00663704	0.388248	82	2
001 30ms181012 BRCA2-Halo PCNA-iRFP IR tracking	WT G10 +IR	190.12	0.00242544	0.0637392	257	0
001 30ms181012 BRCA2-Halo PCNA-iRFP IR tracking	WT G10 +IR	190.14	0.00404527	0.134483	271	2
001 30ms181012 BRCA2-Halo PCNA-iRFP IR tracking	WT G10 +IR	190.16	2.80513	0.35758	298	2
001 30ms181012 BRCA2-Halo PCNA-iRFP IR tracking	WT G10 +IR	190.7	0.00440269	0.140637	199	2
001 30ms181012 BRCA2-Halo PCNA-iRFP IR tracking	WT G10 +IR	190.8	0.0117131	0.161179	219	1
001 30ms181012 BRCA2-Halo PCNA-iRFP IR tracking	WT G10 +IR	190.9	9.37705e-05	-0.0175697	235	2
001 30ms181012 BRCA2-Halo PCNA-iRFP IR tracking	WT G10 +IR	191.1	0.873018	0.114718	135	2
001 30ms181012 BRCA2-Halo PCNA-iRFP IR tracking	WT G10 +IR	191.3	0.00365259	0.132892	162	0
001 30ms181012 BRCA2-Halo PCNA-iRFP IR tracking	WT G10 +IR	195.4	1.38781	0.42153	113	0
001 30ms181012 BRCA2-Halo PCNA-iRFP IR tracking	WT G10 +IR	195.5	0.00481232	0.0924474	140	2
001 30ms181012 BRCA2-Halo PCNA-iRFP IR tracking	WT G10 +IR	195.6	0.0195598	0.276851	151	1
001 30ms181012 BRCA2-Halo PCNA-iRFP IR tracking	WT G10 +IR	196.2	0.000891729	-0.033192	154	2
001 30ms181012 BRCA2-Halo PCNA-iRFP IR tracking	WT G10 +IR	197.1	0.00178662	0.226493	161	2
001 30ms181012 BRCA2-Halo PCNA-iRFP IR tracking	WT G10 +IR	198.1	0.0175078	0.281074	134	1
001 30ms181012 BRCA2-Halo PCNA-iRFP IR tracking	WT G10 +IR	198.12	0.0086879	0.225588	212	1
001 30ms181012 BRCA2-Halo PCNA-iRFP IR tracking	WT G10 +IR	198.7	0.00921503	0.0889986	170	1
001 30ms181012 BRCA2-Halo PCNA-iRFP IR tracking	WT G10 +IR	201.1	0.000499524	0.0678703	167	2
001 30ms181012 BRCA2-Halo PCNA-iRFP IR tracking	WT G10 +IR	205.1	0.00172991	0.0404839	107	2
001 30ms181012 BRCA2-Halo PCNA-iRFP IR tracking	WT G10 +IR	209.1	0.15485	0.418735	180	1
001 30ms181012 BRCA2-Halo PCNA-iRFP IR tracking	WT G10 +IR	210.3	0.931906	0.0167953	184	0
001 30ms181012 BRCA2-Halo PCNA-iRFP IR tracking	WT G10 +IR	211.1	0.000472969	0.0423726	0	2
001 30ms181012 BRCA2-Halo PCNA-iRFP IR tracking	WT G10 +IR	211.3	0.000587766	0.040755	108	2
001 30ms181012 BRCA2-Halo PCNA-iRFP IR tracking	WT G10 +IR	212.2	0.00467703	0.220621	78	2
001 30ms181012 BRCA2-Halo PCNA-iRFP IR tracking	WT G10 +IR	212.4	0.00475968	0.141599	107	2
001 30ms181012 BRCA2-Halo PCNA-iRFP IR tracking	WT G10 +IR	212.6	0.00164163	0.168052	119	2
001 30ms181012 BRCA2-Halo PCNA-iRFP IR tracking	WT G10 +IR	212.9	0.0268889	0.338899	154	1
001 30ms181012 BRCA2-Halo PCNA-iRFP IR tracking	WT G10 +IR	215.13	0.000525158	-0.0864554	259	2
001 30ms181012 BRCA2-Halo PCNA-iRFP IR tracking	WT G10 +IR	215.5	0.00248248	0.111676	184	2
001 30ms181012 BRCA2-Halo PCNA-iRFP IR tracking	WT G10 +IR	219.1	2.11378	0.510062	195	0
001 30ms181012 BRCA2-Halo PCNA-iRFP IR tracking	WT G10 +IR	220.4	0.00819876	0.3057	217	2
001 30ms181012 BRCA2-Halo PCNA-iRFP IR tracking	WT G10 +IR	221.1	1.53339	0.164171	201	0
001 30ms181012 BRCA2-Halo PCNA-iRFP IR tracking	WT G10 +IR	221.11	0.716403	0.51877	263	0
001 30ms181012 BRCA2-Halo PCNA-iRFP IR tracking	WT G10 +IR	222.1	0.0490971	0.257017	148	1
001 30ms181012 BRCA2-Halo PCNA-iRFP IR tracking	WT G10 +IR	222.14	0.853774	0.110327	166	1
001 30ms181012 BRCA2-Halo PCNA-iRFP IR tracking	WT G10 +IR	222.2	0.441633	0.460407	90	0
001 30ms181012 BRCA2-Halo PCNA-iRFP IR tracking	WT G10 +IR	222.9	0.210145	0.230853	135	0
001 30ms181012 BRCA2-Halo PCNA-iRFP IR tracking	WT G10 +IR	223.3	0.189533	0.353988	139	2
001 30ms181012 BRCA2-Halo PCNA-iRFP IR tracking	WT G10 +IR	223.4	0.420579	0.647895	155	1
001 30ms181012 BRCA2-Halo PCNA-iRFP IR tracking	WT G10 +IR	223.6	0.0505157	0.171663	185	1
001 30ms181012 BRCA2-Halo PCNA-iRFP IR tracking	WT G10 +IR	226.4	0.00360281	0.178291	176	2
001 30ms181012 BRCA2-Halo PCNA-iRFP IR tracking	WT G10 +IR	229.1	0.00109753	0.14142	223	2
001 30ms181012 BRCA2-Halo PCNA-iRFP IR tracking	WT G10 +IR	235.5	0.0036744	0.168969	179	2
001 30ms181012 BRCA2-Halo PCNA-iRFP IR tracking	WT G10 +IR	235.7	0.00152374	0.0656382	208	2
001 30ms181012 BRCA2-Halo PCNA-iRFP IR tracking	WT G10 +IR	239.1	0.000744244	0.0722642	186	2
001 30ms181012 BRCA2-Halo PCNA-iRFP IR tracking	WT G10 +IR	243.12	0.00597809	0.0777784	92	2
001 30ms181012 BRCA2-Halo PCNA-iRFP IR tracking	WT G10 +IR	243.13	0.320377	0.439405	193	0
001 30ms181012 BRCA2-Halo PCNA-iRFP IR tracking	WT G10 +IR	243.16	0.0669455	0.666439	208	2
001 30ms181012 BRCA2-Halo PCNA-iRFP IR tracking	WT G10 +IR	243.19	0.290392	0.633989	239	1
001 30ms181012 BRCA2-Halo PCNA-iRFP IR tracking	WT G10 +IR	243.2	0.00397021	-0.00356724	251	2
001 30ms181012 BRCA2-Halo PCNA-iRFP IR tracking	WT G10 +IR	243.4	0.0117254	0.31931	20	2
001 30ms181012 BRCA2-Halo PCNA-iRFP IR tracking	WT G10 +IR	243.5	0.0167256	0.150498	46	1
001 30ms181012 BRCA2-Halo PCNA-iRFP IR tracking	WT G10 +IR	243.8	0.00960793	0.434991	72	2
001 30ms181012 BRCA2-Halo PCNA-iRFP IR tracking	WT G10 +IR	244.1	0.00122745	0.0296483	204	1
001 30ms181012 BRCA2-Halo PCNA-iRFP IR tracking	WT G10 +IR	244.2	0.000166333	-0.130327	137	1
001 30ms181012 BRCA2-Halo PCNA-iRFP IR tracking	WT G10 +IR	248.1	0.00167809	0.307097	166	2
001 30ms181012 BRCA2-Halo PCNA-iRFP IR tracking	WT G10 +IR	248.3	0.000232889	0.0391461	205	2
001 30ms181012 BRCA2-Halo PCNA-iRFP IR tracking	WT G10 +IR	254.3	0.524545	0.0761054	241	0
001 30ms181012 BRCA2-Halo PCNA-iRFP IR tracking	WT G10 +IR	257.1	0.00917328	0.0278497	238	1
001 30ms181012 BRCA2-Halo PCNA-iRFP IR tracking	WT G10 +IR	257.9	0.00608829	0.240205	211	2
001 30ms181012 BRCA2-Halo PCNA-iRFP IR tracking	WT G10 +IR	271.1	0.115885	0.434441	204	1
001 30ms181012 BRCA2-Halo PCNA-iRFP IR tracking	WT G10 +IR	271.3	0.108521	0.498619	225	1
001 30ms181012 BRCA2-Halo PCNA-iRFP IR tracking	WT G10 +IR	277.1	0.00312349	0.161038	277	2
001 30ms181012 BRCA2-Halo PCNA-iRFP IR tracking	WT G10 +IR	277.3	0.00997093	0.0881907	299	2
001 30ms181012 BRCA2-Halo PCNA-iRFP IR tracking	WT G10 +IR	277.9	0.00496089	0.126258	349	2
001 30ms181012 BRCA2-Halo PCNA-iRFP IR tracking	WT G10 +IR	282.2	0.00484976	0.341254	230	2
001 30ms181012 BRCA2-Halo PCNA-iRFP IR tracking	WT G10 +IR	283.2	0.00010238	0.0162607	255	2
001 30ms181012 BRCA2-Halo PCNA-iRFP IR tracking	WT G10 +IR	284.1	1.30924	0.269274	272	0
001 30ms181012 BRCA2-Halo PCNA-iRFP IR tracking	WT G10 +IR	285.1	0.00290904	0.190488	245	2
001 30ms181012 BRCA2-Halo PCNA-iRFP IR tracking	WT G10 +IR	289.1	0.00131584	0.152738	277	2
001 30ms181012 BRCA2-Halo PCNA-iRFP IR tracking	WT G10 +IR	290.13	0.0144916	0.292214	209	2
001 30ms181012 BRCA2-Halo PCNA-iRFP IR tracking	WT G10 +IR	290.16	0.358215	0.355817	234	1
001 30ms181012 BRCA2-Halo PCNA-iRFP IR tracking	WT G10 +IR	290.19	0.443698	0.630278	262	0
001 30ms181012 BRCA2-Halo PCNA-iRFP IR tracking	WT G10 +IR	290.21	0.209336	0.331606	281	0
001 30ms181012 BRCA2-Halo PCNA-iRFP IR tracking	WT G10 +IR	290.3	0.015067	0.477235	9	2
001 30ms181012 BRCA2-Halo PCNA-iRFP IR tracking	WT G10 +IR	290.5	0.000849385	0.0435941	42	2
001 30ms181012 BRCA2-Halo PCNA-iRFP IR tracking	WT G10 +IR	290.7	0.0075723	0.437326	171	2
001 30ms181012 BRCA2-Halo PCNA-iRFP IR tracking	WT G10 +IR	292.1	3.47895	0.399296	293	0
001 30ms181012 BRCA2-Halo PCNA-iRFP IR tracking	WT G10 +IR	293.1	0.516452	-0.0340739	292	0
001 30ms181012 BRCA2-Halo PCNA-iRFP IR tracking	WT G10 +IR	294.1	0.000620118	0.0716681	246	2
001 30ms181012 BRCA2-Halo PCNA-iRFP IR tracking	WT G10 +IR	296.12	0.00167651	-0.00183496	196	2
001 30ms181012 BRCA2-Halo PCNA-iRFP IR tracking	WT G10 +IR	296.9	0.00275776	0.196455	172	2
001 30ms181012 BRCA2-Halo PCNA-iRFP IR tracking	WT G10 +IR	302.1	0.00109334	0.108733	288	2
001 30ms181012 BRCA2-Halo PCNA-iRFP IR tracking	WT G10 +IR	302.3	0.00286016	0.243138	329	2
001 30ms181012 BRCA2-Halo PCNA-iRFP IR tracking	WT G10 +IR	303.1	0.0414135	0.456808	222	1
001 30ms181012 BRCA2-Halo PCNA-iRFP IR tracking	WT G10 +IR	303.3	0.000326345	0.109266	248	2
001 30ms181012 BRCA2-Halo PCNA-iRFP IR tracking	WT G10 +IR	307.1	0.00135212	0.219591	245	2
001 30ms181012 BRCA2-Halo PCNA-iRFP IR tracking	WT G10 +IR	311.6	0.110143	0.376113	299	1
001 30ms181012 BRCA2-Halo PCNA-iRFP IR tracking	WT G10 +IR	312.2	0.00343373	0.222315	260	2
001 30ms181012 BRCA2-Halo PCNA-iRFP IR tracking	WT G10 +IR	312.6	0.76225	0.523111	297	0
001 30ms181012 BRCA2-Halo PCNA-iRFP IR tracking	WT G10 +IR	315.1	0.0136616	0.520055	0	2
001 30ms181012 BRCA2-Halo PCNA-iRFP IR tracking	WT G10 +IR	315.19	0.00066225	0.0871102	117	2
001 30ms181012 BRCA2-Halo PCNA-iRFP IR tracking	WT G10 +IR	315.26	0.441402	0.544302	173	2
001 30ms181012 BRCA2-Halo PCNA-iRFP IR tracking	WT G10 +IR	315.9	0.00207969	0.0824489	51	2
001 30ms181012 BRCA2-Halo PCNA-iRFP IR tracking	WT G10 +IR	322.5	0.0935026	0.0863081	332	1
001 30ms181012 BRCA2-Halo PCNA-iRFP IR tracking	WT G10 +IR	333.1	0.404244	0.529954	312	0
001 30ms181012 BRCA2-Halo PCNA-iRFP IR tracking	WT G10 +IR	338.1	0.000471387	0.0226227	325	2
001 30ms181012 BRCA2-Halo PCNA-iRFP IR tracking	WT G10 +IR	341.1	1.21609	0.238493	333	0
001 30ms181012 BRCA2-Halo PCNA-iRFP IR tracking	WT G10 +IR	342.2	0.104746	0.329967	319	1
001 30ms181012 BRCA2-Halo PCNA-iRFP IR tracking	WT G10 +IR	343.2	0.0225097	0.218865	308	1
001 30ms181012 BRCA2-Halo PCNA-iRFP IR tracking	WT G10 +IR	343.4	0.178754	0.707897	328	1
001 30ms181012 BRCA2-Halo PCNA-iRFP IR tracking	WT G10 +IR	345.1	0.00563187	0.406798	328	2
001 30ms181012 BRCA2-Halo PCNA-iRFP IR tracking	WT G10 +IR	346.1	0.00412962	0.142215	301	2
001 30ms181012 BRCA2-Halo PCNA-iRFP IR tracking	WT G10 +IR	347.6	0.00817967	0.430244	362	2
001 30ms181012 BRCA2-Halo PCNA-iRFP IR tracking	WT G10 +IR	347.7	0.0618999	0.390619	383	1
001 30ms181012 BRCA2-Halo PCNA-iRFP IR tracking	WT G10 +IR	350.1	5.84318e-05	0.067734	291	2
001 30ms181012 BRCA2-Halo PCNA-iRFP IR tracking	WT G10 +IR	350.4	0.00104911	0.309588	325	2
001 30ms181012 BRCA2-Halo PCNA-iRFP IR tracking	WT G10 +IR	352.1	0.696586	0.278708	341	0
001 30ms181012 BRCA2-Halo PCNA-iRFP IR tracking	WT G10 +IR	353.1	2.05231	0.480483	321	0
001 30ms181012 BRCA2-Halo PCNA-iRFP IR tracking	WT G10 +IR	353.5	1.97866	0.516646	343	0
001 30ms181012 BRCA2-Halo PCNA-iRFP IR tracking	WT G10 +IR	354.2	0.00369773	0.167283	328	2
001 30ms181012 BRCA2-Halo PCNA-iRFP IR tracking	WT G10 +IR	354.3	0.0344107	0.361556	347	1
001 30ms181012 BRCA2-Halo PCNA-iRFP IR tracking	WT G10 +IR	357.3	1.76963	0.287977	348	0
001 30ms181012 BRCA2-Halo PCNA-iRFP IR tracking	WT G10 +IR	368.1	1.65634	0.105141	324	0
001 30ms181012 BRCA2-Halo PCNA-iRFP IR tracking	WT G10 +IR	368.2	0.00222009	0.10424	335	2
001 30ms181012 BRCA2-Halo PCNA-iRFP IR tracking	WT G10 +IR	370.1	0.0005042	0.0232093	245	2
001 30ms181012 BRCA2-Halo PCNA-iRFP IR tracking	WT G10 +IR	372.2	0.000108423	0.0757294	350	2
001 30ms181012 BRCA2-Halo PCNA-iRFP IR tracking	WT G10 +IR	373.1	0.00303177	0.0234943	355	2
001 30ms181012 BRCA2-Halo PCNA-iRFP IR tracking	WT G10 +IR	378.3	0.412494	0.079108	367	0
001 30ms181012 BRCA2-Halo PCNA-iRFP IR tracking	WT G10 +IR	380.2	0.000421529	-0.0771468	332	2
001 30ms181012 BRCA2-Halo PCNA-iRFP IR tracking	WT G10 +IR	390.2	0.0192792	0.0841921	375	1
001 30ms181012 BRCA2-Halo PCNA-iRFP IR tracking	WT G10 +IR	392.1	0.33274	0.179871	387	0
001 30ms181012 BRCA2-Halo PCNA-iRFP IR tracking	WT G10 +IR	394.4	0.217103	0.491862	386	1
001 30ms181012 BRCA2-Halo PCNA-iRFP IR tracking	WT G10 +IR	399.1	0.000998499	0.183516	381	2
001 30ms181012 BRCA2-Halo PCNA-iRFP IR tracking	WT G10 +IR	399.3	0.00184256	0.160264	416	2
001 30ms181012 BRCA2-Halo PCNA-iRFP IR tracking	WT G10 +IR	401.1	1.26785	0.447715	397	0
001 30ms181012 BRCA2-Halo PCNA-iRFP IR tracking	WT G10 +IR	402.2	0.00093063	0.107367	391	2
001 30ms181012 BRCA2-Halo PCNA-iRFP IR tracking	WT G10 +IR	409.1	0.131038	0.416992	300	1
001 30ms181012 BRCA2-Halo PCNA-iRFP IR tracking	WT G10 +IR	409.13	0.20866	0.796431	316	1
001 30ms181012 BRCA2-Halo PCNA-iRFP IR tracking	WT G10 +IR	409.15	0.046264	0.501912	332	2
001 30ms181012 BRCA2-Halo PCNA-iRFP IR tracking	WT G10 +IR	409.18	0.0288991	0.292915	404	2
001 30ms181012 BRCA2-Halo PCNA-iRFP IR tracking	WT G10 +IR	412.2	0.0822052	0.413888	406	1
001 30ms181012 BRCA2-Halo PCNA-iRFP IR tracking	WT G10 +IR	413.1	2.39516	0.577237	415	0
001 30ms181012 BRCA2-Halo PCNA-iRFP IR tracking	WT G10 +IR	417.1	0.0016089	0.124692	366	2
001 30ms181012 BRCA2-Halo PCNA-iRFP IR tracking	WT G10 +IR	419.1	1.81499	0.339983	323	0
001 30ms181012 BRCA2-Halo PCNA-iRFP IR tracking	WT G10 +IR	419.2	0.0021676	0.099334	341	2
001 30ms181012 BRCA2-Halo PCNA-iRFP IR tracking	WT G10 +IR	420.3	0.00497798	0.127474	400	2
001 30ms181012 BRCA2-Halo PCNA-iRFP IR tracking	WT G10 +IR	423.1	0.00366831	0.561719	432	2
001 30ms181012 BRCA2-Halo PCNA-iRFP IR tracking	WT G10 +IR	426.1	0.898335	0.167397	423	0
001 30ms181012 BRCA2-Halo PCNA-iRFP IR tracking	WT G10 +IR	427.3	0.969809	0.10283	439	0
001 30ms181012 BRCA2-Halo PCNA-iRFP IR tracking	WT G10 +IR	429.1	0.0943166	0.405883	433	1
001 30ms181012 BRCA2-Halo PCNA-iRFP IR tracking	WT G10 +IR	429.3	0.126559	0.194256	389	0
001 30ms181012 BRCA2-Halo PCNA-iRFP IR tracking	WT G10 +IR	429.4	0.120398	0.425402	406	1
001 30ms181012 BRCA2-Halo PCNA-iRFP IR tracking	WT G10 +IR	431.13	0.0831932	0.148416	377	2
001 30ms181012 BRCA2-Halo PCNA-iRFP IR tracking	WT G10 +IR	431.14	0.263684	0.471953	410	0
001 30ms181012 BRCA2-Halo PCNA-iRFP IR tracking	WT G10 +IR	431.18	1.11546	0.276021	441	2
001 30ms181012 BRCA2-Halo PCNA-iRFP IR tracking	WT G10 +IR	431.2	0.00069056	0.172036	120	2
001 30ms181012 BRCA2-Halo PCNA-iRFP IR tracking	WT G10 +IR	431.6	0.000993484	0.0647721	148	2
001 30ms181012 BRCA2-Halo PCNA-iRFP IR tracking	WT G10 +IR	431.8	0.00831675	0.170104	345	2
001 30ms181012 BRCA2-Halo PCNA-iRFP IR tracking	WT G10 +IR	433.1	0.00325538	0.27073	370	2
001 30ms181012 BRCA2-Halo PCNA-iRFP IR tracking	WT G10 +IR	433.2	0.754391	0.529129	423	0
001 30ms181012 BRCA2-Halo PCNA-iRFP IR tracking	WT G10 +IR	433.6	3.59561	0.383605	450	0
001 30ms181012 BRCA2-Halo PCNA-iRFP IR tracking	WT G10 +IR	434.1	0.000724153	0.0423059	439	2
001 30ms181012 BRCA2-Halo PCNA-iRFP IR tracking	WT G10 +IR	436.1	0.0013161	0.242652	454	2
001 30ms181012 BRCA2-Halo PCNA-iRFP IR tracking	WT G10 +IR	437.1	0.00102771	0.0706218	442	2
001 30ms181012 BRCA2-Halo PCNA-iRFP IR tracking	WT G10 +IR	439.2	0.0144994	0.304822	444	1
001 30ms181012 BRCA2-Halo PCNA-iRFP IR tracking	WT G10 +IR	442.12	0.0169482	0.21234	452	2
001 30ms181012 BRCA2-Halo PCNA-iRFP IR tracking	WT G10 +IR	443.2	3.02314	0.491033	462	0
001 30ms181012 BRCA2-Halo PCNA-iRFP IR tracking	WT G10 +IR	445.2	0.0789831	0.229809	455	1
001 30ms181012 BRCA2-Halo PCNA-iRFP IR tracking	WT G10 +IR	448.8	0.00284978	0.234441	445	2
001 30ms181012 BRCA2-Halo PCNA-iRFP IR tracking	WT G10 +IR	450.3	0.00319017	0.0977453	465	2
001 30ms181012 BRCA2-Halo PCNA-iRFP IR tracking	WT G10 +IR	452.2	0.00044679	0.0616223	473	2
001 30ms181012 BRCA2-Halo PCNA-iRFP IR tracking	WT G10 +IR	455.7	0.45244	0.245527	480	0
001 30ms181012 BRCA2-Halo PCNA-iRFP IR tracking	WT G10 +IR	459.1	0.57654	0.0741248	485	0
001 30ms181012 BRCA2-Halo PCNA-iRFP IR tracking	WT G10 +IR	460.2	0.156769	0.434088	508	1
001 30ms181012 BRCA2-Halo PCNA-iRFP IR tracking	WT G10 +IR	466.1	0.220877	0.536625	514	1
001 30ms181012 BRCA2-Halo PCNA-iRFP IR tracking	WT G10 +IR	469.2	0.14348	0.570308	517	1
001 30ms181012 BRCA2-Halo PCNA-iRFP IR tracking	WT G10 +IR	473.1	0.00523582	0.300123	487	2
001 30ms181012 BRCA2-Halo PCNA-iRFP IR tracking	WT G10 +IR	474.2	0.00481602	0.22522	535	2
001 30ms181012 BRCA2-Halo PCNA-iRFP IR tracking	WT G10 +IR	475.1	0.786132	0.104865	540	0
001 30ms181012 BRCA2-Halo PCNA-iRFP IR tracking	WT G10 +IR	476.1	0.0111097	0.462163	529	2
001 30ms181012 BRCA2-Halo PCNA-iRFP IR tracking	WT G10 +IR	480.5	0.00176061	-0.0286608	528	2
001 30ms181012 BRCA2-Halo PCNA-iRFP IR tracking	WT G10 +IR	482.2	0.00502079	0.387288	497	2
001 30ms181012 BRCA2-Halo PCNA-iRFP IR tracking	WT G10 +IR	483.2	0.248128	0.0407518	548	0
001 30ms181012 BRCA2-Halo PCNA-iRFP IR tracking	WT G10 +IR	485.2	0.0142402	0.276376	518	2
001 30ms181012 BRCA2-Halo PCNA-iRFP IR tracking	WT G10 +IR	485.6	0.0112937	0.51191	541	2
001 30ms181012 BRCA2-Halo PCNA-iRFP IR tracking	WT G10 +IR	489.1	0.000393296	0.0177995	556	2
001 30ms181012 BRCA2-Halo PCNA-iRFP IR tracking	WT G10 +IR	489.2	0.00379695	0.0736367	574	1
001 30ms181012 BRCA2-Halo PCNA-iRFP IR tracking	WT G10 +IR	493.4	0.00317511	0.140295	594	2
001 30ms181012 BRCA2-Halo PCNA-iRFP IR tracking	WT G10 +IR	494.1	0.00342532	0.263919	574	2
001 30ms181012 BRCA2-Halo PCNA-iRFP IR tracking	WT G10 +IR	496.1	0.0011094	0.143748	634	1
001 30ms181012 BRCA2-Halo PCNA-iRFP IR tracking	WT G10 +IR	496.12	0.0584279	-0.0393728	665	2
001 30ms181012 BRCA2-Halo PCNA-iRFP IR tracking	WT G10 +IR	496.9	0.00274791	0.141511	618	2
001 30ms181012 BRCA2-Halo PCNA-iRFP IR tracking	WT G10 +IR	500.2	0.0821738	0.383906	597	1
001 30ms181012 BRCA2-Halo PCNA-iRFP IR tracking	WT G10 +IR	501.2	0.026188	0.235733	562	1
001 30ms181012 BRCA2-Halo PCNA-iRFP IR tracking	WT G10 +IR	503.3	0.00904301	0.353426	604	2
001 30ms181012 BRCA2-Halo PCNA-iRFP IR tracking	WT G10 +IR	503.5	0.00538919	0.222505	638	2
001 30ms181012 BRCA2-Halo PCNA-iRFP IR tracking	WT G10 +IR	503.7	0.00151425	-0.0833704	733	2
001 30ms181012 BRCA2-Halo PCNA-iRFP IR tracking	WT G10 +IR	506.1	1.66271	0.349531	594	0
001 30ms181012 BRCA2-Halo PCNA-iRFP IR tracking	WT G10 +IR	507.1	0.47718	0.157623	595	0
001 30ms181012 BRCA2-Halo PCNA-iRFP IR tracking	WT G10 +IR	508.1	0.00725983	0.250113	594	2
001 30ms181012 BRCA2-Halo PCNA-iRFP IR tracking	WT G10 +IR	509.4	0.0791258	0.525738	481	1
001 30ms181012 BRCA2-Halo PCNA-iRFP IR tracking	WT G10 +IR	509.6	0.000735886	0.216608	505	2
001 30ms181012 BRCA2-Halo PCNA-iRFP IR tracking	WT G10 +IR	509.8	0.000257471	0.0570058	588	2
001 30ms181012 BRCA2-Halo PCNA-iRFP IR tracking	WT G10 +IR	511.2	0.200822	0.434291	599	1
001 30ms181012 BRCA2-Halo PCNA-iRFP IR tracking	WT G10 +IR	520.2	0.00175216	0.147973	607	2
001 30ms181012 BRCA2-Halo PCNA-iRFP IR tracking	WT G10 +IR	522.6	0.150146	0.558254	635	1
001 30ms181012 BRCA2-Halo PCNA-iRFP IR tracking	WT G10 +IR	522.8	0.129662	0.592485	665	1
001 30ms181012 BRCA2-Halo PCNA-iRFP IR tracking	WT G10 +IR	523.1	0.0118266	0.347441	393	2
001 30ms181012 BRCA2-Halo PCNA-iRFP IR tracking	WT G10 +IR	523.12	0.140562	0.493578	488	1
001 30ms181012 BRCA2-Halo PCNA-iRFP IR tracking	WT G10 +IR	523.17	0.0483184	0.251165	555	1
001 30ms181012 BRCA2-Halo PCNA-iRFP IR tracking	WT G10 +IR	523.18	0.0639325	0.408338	568	2
001 30ms181012 BRCA2-Halo PCNA-iRFP IR tracking	WT G10 +IR	523.24	0.0269139	0.27752	599	1
001 30ms181012 BRCA2-Halo PCNA-iRFP IR tracking	WT G10 +IR	523.26	0.106129	0.554646	613	1
001 30ms181012 BRCA2-Halo PCNA-iRFP IR tracking	WT G10 +IR	523.3	0.0155643	0.59932	427	2
001 30ms181012 BRCA2-Halo PCNA-iRFP IR tracking	WT G10 +IR	523.7	0.264966	0.482226	457	1
001 30ms181012 BRCA2-Halo PCNA-iRFP IR tracking	WT G10 +IR	528.5	0.00198841	0.0758892	635	2
001 30ms181012 BRCA2-Halo PCNA-iRFP IR tracking	WT G10 +IR	533.1	0.0102531	0.317121	649	2
001 30ms181012 BRCA2-Halo PCNA-iRFP IR tracking	WT G10 +IR	534.2	0.0405189	0.269432	633	1
001 30ms181012 BRCA2-Halo PCNA-iRFP IR tracking	WT G10 +IR	536.1	2.00197	0.705383	659	0
001 30ms181012 BRCA2-Halo PCNA-iRFP IR tracking	WT G10 +IR	537.1	0.00113719	0.00243989	659	2
001 30ms181012 BRCA2-Halo PCNA-iRFP IR tracking	WT G10 +IR	539.1	0.534336	0.157515	665	0
001 30ms181012 BRCA2-Halo PCNA-iRFP IR tracking	WT G10 +IR	546.1	0.00274296	0.038514	677	1
001 30ms181012 BRCA2-Halo PCNA-iRFP IR tracking	WT G10 +IR	551.4	0.000383214	0.021454	677	2
001 30ms181012 BRCA2-Halo PCNA-iRFP IR tracking	WT G10 +IR	553.1	0.00362772	0.274487	683	2
001 30ms181012 BRCA2-Halo PCNA-iRFP IR tracking	WT G10 +IR	555.2	0.0823181	0.380919	694	1
001 30ms181012 BRCA2-Halo PCNA-iRFP IR tracking	WT G10 +IR	561.2	0.188652	0.468627	702	1
001 30ms181012 BRCA2-Halo PCNA-iRFP IR tracking	WT G10 +IR	565.2	0.00954603	0.293031	729	2
001 30ms181012 BRCA2-Halo PCNA-iRFP IR tracking	WT G10 +IR	567.2	0.000842743	0.268958	709	2
001 30ms181012 BRCA2-Halo PCNA-iRFP IR tracking	WT G10 +IR	572.1	0.0947743	-0.0456693	738	0
001 30ms181012 BRCA2-Halo PCNA-iRFP IR tracking	WT G10 +IR	573.1	0.277361	0.448834	726	0
001 30ms181012 BRCA2-Halo PCNA-iRFP IR tracking	WT G10 +IR	577.1	1.0023	0.0972001	700	0
001 30ms181012 BRCA2-Halo PCNA-iRFP IR tracking	WT G10 +IR	577.2	0.00260274	0.242119	715	2
001 30ms181012 BRCA2-Halo PCNA-iRFP IR tracking	WT G10 +IR	583.4	0.444388	0.46827	756	1
001 30ms181012 BRCA2-Halo PCNA-iRFP IR tracking	WT G10 +IR	587.1	0.00114645	0.123161	742	2
001 30ms181012 BRCA2-Halo PCNA-iRFP IR tracking	WT G10 +IR	589.1	0.0003675	0.1098	684	2
001 30ms181012 BRCA2-Halo PCNA-iRFP IR tracking	WT G10 +IR	590.1	0.486812	0.345501	780	0
001 30ms181012 BRCA2-Halo PCNA-iRFP IR tracking	WT G10 +IR	592.1	0.000426659	0.0614298	746	2
001 30ms181012 BRCA2-Halo PCNA-iRFP IR tracking	WT G10 +IR	593.1	0.000379402	-0.0434994	777	2
001 30ms181012 BRCA2-Halo PCNA-iRFP IR tracking	WT G10 +IR	595.2	0.012114	0.285493	778	2
001 30ms181012 BRCA2-Halo PCNA-iRFP IR tracking	WT G10 +IR	597.1	0.600317	0.0223765	805	0
001 30ms181012 BRCA2-Halo PCNA-iRFP IR tracking	WT G10 +IR	600.1	0.157105	0.0622253	808	0
001 30ms181012 BRCA2-Halo PCNA-iRFP IR tracking	WT G10 +IR	601.1	0.863122	0.379314	811	0
001 30ms181012 BRCA2-Halo PCNA-iRFP IR tracking	WT G10 +IR	605.3	0.00127069	0.0374458	778	2
001 30ms181012 BRCA2-Halo PCNA-iRFP IR tracking	WT G10 +IR	606.2	0.00455939	0.177926	708	2
001 30ms181012 BRCA2-Halo PCNA-iRFP IR tracking	WT G10 +IR	606.4	0.00298118	0.189114	790	2
001 30ms181012 BRCA2-Halo PCNA-iRFP IR tracking	WT G10 +IR	608.3	4.09382	0.417743	824	0
001 30ms181012 BRCA2-Halo PCNA-iRFP IR tracking	WT G10 +IR	613.1	0.000812008	0.0279255	801	2
001 30ms181012 BRCA2-Halo PCNA-iRFP IR tracking	WT G10 +IR	616.1	0.00297937	0.162406	820	2
001 30ms181012 BRCA2-Halo PCNA-iRFP IR tracking	WT G10 +IR	617.1	0.00088658	0.114642	817	2
001 30ms181012 BRCA2-Halo PCNA-iRFP IR tracking	WT G10 +IR	618.2	0.00307548	0.232744	825	2
001 30ms181012 BRCA2-Halo PCNA-iRFP IR tracking	WT G10 +IR	622.2	0.00601869	0.331677	856	2
001 30ms181012 BRCA2-Halo PCNA-iRFP IR tracking	WT G10 +IR	624.1	1.47856	0.653995	857	0
001 30ms181012 BRCA2-Halo PCNA-iRFP IR tracking	WT G10 +IR	626.3	0.00249575	0.0910374	860	2
001 30ms181012 BRCA2-Halo PCNA-iRFP IR tracking	WT G10 +IR	626.4	1.35485	0.19532	906	0
001 30ms181012 BRCA2-Halo PCNA-iRFP IR tracking	WT G10 +IR	628.1	0.000191815	0.0246991	870	2
001 30ms181012 BRCA2-Halo PCNA-iRFP IR tracking	WT G10 +IR	632.3	0.00240713	0.152239	893	2
001 30ms181012 BRCA2-Halo PCNA-iRFP IR tracking	WT G10 +IR	632.7	0.00215923	0.0971197	1038	2
001 30ms181012 BRCA2-Halo PCNA-iRFP IR tracking	WT G10 +IR	635.1	0.0392804	0.447342	924	1
001 30ms181012 BRCA2-Halo PCNA-iRFP IR tracking	WT G10 +IR	638.2	0.170781	0.50556	881	1
001 30ms181012 BRCA2-Halo PCNA-iRFP IR tracking	WT G10 +IR	639.4	0.605946	0.192599	911	0
001 30ms181012 BRCA2-Halo PCNA-iRFP IR tracking	WT G10 +IR	643.5	0.120281	0.245391	912	1
001 30ms181012 BRCA2-Halo PCNA-iRFP IR tracking	WT G10 +IR	643.6	1.10137	0.622068	936	0
001 30ms181012 BRCA2-Halo PCNA-iRFP IR tracking	WT G10 +IR	646.2	0.332953	0.554948	945	1
001 30ms181012 BRCA2-Halo PCNA-iRFP IR tracking	WT G10 +IR	648.2	0.905384	0.369276	924	0
001 30ms181012 BRCA2-Halo PCNA-iRFP IR tracking	WT G10 +IR	652.2	0.184459	0.33335	930	1
001 30ms181012 BRCA2-Halo PCNA-iRFP IR tracking	WT G10 +IR	654.1	0.298665	0.0116265	953	0
001 30ms181012 BRCA2-Halo PCNA-iRFP IR tracking	WT G10 +IR	655.1	0.00120931	0.158214	941	2
001 30ms181012 BRCA2-Halo PCNA-iRFP IR tracking	WT G10 +IR	656.5	1.03265	0.411599	942	0
001 30ms181012 BRCA2-Halo PCNA-iRFP IR tracking	WT G10 +IR	659.1	0.000768976	0.120951	861	2
001 30ms181012 BRCA2-Halo PCNA-iRFP IR tracking	WT G10 +IR	660.3	0.00991471	0.232735	954	2
001 30ms181012 BRCA2-Halo PCNA-iRFP IR tracking	WT G10 +IR	663.1	0.000144911	0.0863656	922	2
001 30ms181012 BRCA2-Halo PCNA-iRFP IR tracking	WT G10 +IR	664.3	1.22983	0.139048	981	0
001 30ms181012 BRCA2-Halo PCNA-iRFP IR tracking	WT G10 +IR	666.3	0.00122976	0.0888988	996	2
001 30ms181012 BRCA2-Halo PCNA-iRFP IR tracking	WT G10 +IR	667.1	0.000606918	0.106644	936	2
001 30ms181012 BRCA2-Halo PCNA-iRFP IR tracking	WT G10 +IR	668.1	0.00202589	0.16299	976	2
001 30ms181012 BRCA2-Halo PCNA-iRFP IR tracking	WT G10 +IR	670.1	0.0105946	0.0557614	990	1
001 30ms181012 BRCA2-Halo PCNA-iRFP IR tracking	WT G10 +IR	671.2	0.000398469	0.109809	965	2
001 30ms181012 BRCA2-Halo PCNA-iRFP IR tracking	WT G10 +IR	675.1	0.62971	0.0995237	992	0
001 30ms181012 BRCA2-Halo PCNA-iRFP IR tracking	WT G10 +IR	676.2	0.000406651	-0.0270428	987	2
001 30ms181012 BRCA2-Halo PCNA-iRFP IR tracking	WT G10 +IR	676.4	0.00262861	0.269101	1066	2
001 30ms181012 BRCA2-Halo PCNA-iRFP IR tracking	WT G10 +IR	676.5	2.0478	0.359631	1102	0
001 30ms181012 BRCA2-Halo PCNA-iRFP IR tracking	WT G10 +IR	678.3	0.0836527	0.287528	985	1
001 30ms181012 BRCA2-Halo PCNA-iRFP IR tracking	WT G10 +IR	679.12	0.017473	0.255064	858	1
001 30ms181012 BRCA2-Halo PCNA-iRFP IR tracking	WT G10 +IR	679.13	0.0248531	0.330676	870	2
001 30ms181012 BRCA2-Halo PCNA-iRFP IR tracking	WT G10 +IR	679.17	0.00767589	0.34903	890	2
001 30ms181012 BRCA2-Halo PCNA-iRFP IR tracking	WT G10 +IR	679.21	0.00186143	0.112995	940	2
001 30ms181012 BRCA2-Halo PCNA-iRFP IR tracking	WT G10 +IR	679.23	0.00132244	0.0209024	986	2
001 30ms181012 BRCA2-Halo PCNA-iRFP IR tracking	WT G10 +IR	679.4	0.00323842	0.177378	787	2
001 30ms181012 BRCA2-Halo PCNA-iRFP IR tracking	WT G10 +IR	679.8	0.00969362	0.526898	819	2
001 30ms181012 BRCA2-Halo PCNA-iRFP IR tracking	WT G10 +IR	682.1	0.00095668	0.129448	1000	2
001 30ms181012 BRCA2-Halo PCNA-iRFP IR tracking	WT G10 +IR	684.14	0.156313	0.288204	1078	1
001 30ms181012 BRCA2-Halo PCNA-iRFP IR tracking	WT G10 +IR	686.1	0.000315463	0.0350415	956	2
001 30ms181012 BRCA2-Halo PCNA-iRFP IR tracking	WT G10 +IR	686.17	0.00487185	0.37349	1056	2
001 30ms181012 BRCA2-Halo PCNA-iRFP IR tracking	WT G10 +IR	686.18	1.49041	0.0891833	1091	1
001 30ms181012 BRCA2-Halo PCNA-iRFP IR tracking	WT G10 +IR	686.4	0.00175345	0.0603701	999	2
001 30ms181012 BRCA2-Halo PCNA-iRFP IR tracking	WT G10 +IR	689.1	0.00495414	0.340423	1012	2
001 30ms181012 BRCA2-Halo PCNA-iRFP IR tracking	WT G10 +IR	689.3	0.00409712	0.423961	1025	2
001 30ms181012 BRCA2-Halo PCNA-iRFP IR tracking	WT G10 +IR	693.1	0.00401526	0.277499	1008	2
001 30ms181012 BRCA2-Halo PCNA-iRFP IR tracking	WT G10 +IR	693.5	0.0017995	0.00283935	1025	2
001 30ms181012 BRCA2-Halo PCNA-iRFP IR tracking	WT G10 +IR	694.1	0.0048852	0.0175187	1086	2
001 30ms181012 BRCA2-Halo PCNA-iRFP IR tracking	WT G10 +IR	694.4	0.169311	0.166321	1031	1
001 30ms181012 BRCA2-Halo PCNA-iRFP IR tracking	WT G10 +IR	694.6	0.131349	0.382183	1050	1
001 30ms181012 BRCA2-Halo PCNA-iRFP IR tracking	WT G10 +IR	696.2	0.275178	0.731612	1039	1
001 30ms181012 BRCA2-Halo PCNA-iRFP IR tracking	WT G10 +IR	698.1	1.64419	0.60253	1036	0
001 30ms181012 BRCA2-Halo PCNA-iRFP IR tracking	WT G10 +IR	701.1	0.000641841	0.0652709	1046	2
001 30ms181012 BRCA2-Halo PCNA-iRFP IR tracking	WT G10 +IR	703.1	0.00285883	0.253173	1036	2
001 30ms181012 BRCA2-Halo PCNA-iRFP IR tracking	WT G10 +IR	704.1	0.00387557	0.154129	1046	2
001 30ms181012 BRCA2-Halo PCNA-iRFP IR tracking	WT G10 +IR	707.1	0.00150187	0.0719978	1080	2
001 30ms181012 BRCA2-Halo PCNA-iRFP IR tracking	WT G10 +IR	709.4	0.0110221	0.482741	1075	2
001 30ms181012 BRCA2-Halo PCNA-iRFP IR tracking	WT G10 +IR	710.2	0.00267701	0.213697	1076	2
001 30ms181012 BRCA2-Halo PCNA-iRFP IR tracking	WT G10 +IR	716.2	0.000483009	0.108517	1083	2
001 30ms181012 BRCA2-Halo PCNA-iRFP IR tracking	WT G10 +IR	718.2	0.181397	0.361131	1109	1
001 30ms181012 BRCA2-Halo PCNA-iRFP IR tracking	WT G10 +IR	720.2	0.0042467	0.139367	1123	2
001 30ms181012 BRCA2-Halo PCNA-iRFP IR tracking	WT G10 +IR	723.1	0.0062165	0.224275	1119	2
001 30ms181012 BRCA2-Halo PCNA-iRFP IR tracking	WT G10 +IR	728.1	1.11704	0.36687	1143	0
001 30ms181012 BRCA2-Halo PCNA-iRFP IR tracking	WT G10 +IR	729.1	0.00203398	0.136123	1144	2
001 30ms181012 BRCA2-Halo PCNA-iRFP IR tracking	WT G10 +IR	729.1	9.81107e-05	0.0398692	1352	2
001 30ms181012 BRCA2-Halo PCNA-iRFP IR tracking	WT G10 +IR	729.3	0.00361363	0.0948045	1235	2
001 30ms181012 BRCA2-Halo PCNA-iRFP IR tracking	WT G10 +IR	729.6	0.000225531	-0.0498392	1262	2
001 30ms181012 BRCA2-Halo PCNA-iRFP IR tracking	WT G10 +IR	729.8	0.000300872	0.0800022	1319	2
001 30ms181012 BRCA2-Halo PCNA-iRFP IR tracking	WT G10 +IR	730.1	0.00471211	0.234536	1116	2
001 30ms181012 BRCA2-Halo PCNA-iRFP IR tracking	WT G10 +IR	734.1	0.0147469	0.176195	1192	1
001 30ms181012 BRCA2-Halo PCNA-iRFP IR tracking	WT G10 +IR	734.11	0.00268299	0.0225514	1226	2
001 30ms181012 BRCA2-Halo PCNA-iRFP IR tracking	WT G10 +IR	734.2	0.859144	0.52511	1137	0
001 30ms181012 BRCA2-Halo PCNA-iRFP IR tracking	WT G10 +IR	734.9	0.0102241	0.309409	1181	2
001 30ms181012 BRCA2-Halo PCNA-iRFP IR tracking	WT G10 +IR	736.1	0.942146	0.612628	1160	0
001 30ms181012 BRCA2-Halo PCNA-iRFP IR tracking	WT G10 +IR	737.2	0.0627758	0.236159	1158	1
001 30ms181012 BRCA2-Halo PCNA-iRFP IR tracking	WT G10 +IR	739.2	0.00306193	0.120627	1152	2
001 30ms181012 BRCA2-Halo PCNA-iRFP IR tracking	WT G10 +IR	741.2	0.000812355	0.0730348	1150	2
001 30ms181012 BRCA2-Halo PCNA-iRFP IR tracking	WT G10 +IR	742.1	0.589225	0.417335	1164	0
001 30ms181012 BRCA2-Halo PCNA-iRFP IR tracking	WT G10 +IR	744.3	0.387724	0.237222	1190	0
001 30ms181012 BRCA2-Halo PCNA-iRFP IR tracking	WT G10 +IR	748.2	0.113362	0.337225	1179	1
001 30ms181012 BRCA2-Halo PCNA-iRFP IR tracking	WT G10 +IR	750.5	0.00220572	0.178908	1162	2
001 30ms181012 BRCA2-Halo PCNA-iRFP IR tracking	WT G10 +IR	752.2	0.143073	0.365093	1177	1
001 30ms181012 BRCA2-Halo PCNA-iRFP IR tracking	WT G10 +IR	755.1	0.621682	0.180366	1196	0
001 30ms181012 BRCA2-Halo PCNA-iRFP IR tracking	WT G10 +IR	758.2	0.0102232	0.0487342	1209	1
001 30ms181012 BRCA2-Halo PCNA-iRFP IR tracking	WT G10 +IR	759.1	0.00339719	0.122574	1208	2
001 30ms181012 BRCA2-Halo PCNA-iRFP IR tracking	WT G10 +IR	763.1	0.940724	0.123912	1199	0
001 30ms181012 BRCA2-Halo PCNA-iRFP IR tracking	WT G10 +IR	764.1	0.00212574	0.0974853	1201	2
001 30ms181012 BRCA2-Halo PCNA-iRFP IR tracking	WT G10 +IR	768.2	0.0777252	0.532358	1231	1
001 30ms181012 BRCA2-Halo PCNA-iRFP IR tracking	WT G10 +IR	769.2	0.1632	0.600166	1222	1
001 30ms181012 BRCA2-Halo PCNA-iRFP IR tracking	WT G10 +IR	770.1	0.00134226	0.326449	1218	2
001 30ms181012 BRCA2-Halo PCNA-iRFP IR tracking	WT G10 +IR	772.1	0.00219719	0.132529	1229	2
001 30ms181012 BRCA2-Halo PCNA-iRFP IR tracking	WT G10 +IR	772.1	0.128207	0.528951	1368	1
001 30ms181012 BRCA2-Halo PCNA-iRFP IR tracking	WT G10 +IR	772.9	0.321757	0.237239	1355	0
001 30ms181012 BRCA2-Halo PCNA-iRFP IR tracking	WT G10 +IR	773.1	3.55376e-05	0.0325099	1235	2
001 30ms181012 BRCA2-Halo PCNA-iRFP IR tracking	WT G10 +IR	774.1	0.00232826	0.00228374	1126	2
001 30ms181012 BRCA2-Halo PCNA-iRFP IR tracking	WT G10 +IR	774.3	0.00567916	0.178612	1159	2
001 30ms181012 BRCA2-Halo PCNA-iRFP IR tracking	WT G10 +IR	774.5	0.00565818	0.237313	1210	2
001 30ms181012 BRCA2-Halo PCNA-iRFP IR tracking	WT G10 +IR	774.8	0.000989017	0.195937	1228	2
001 30ms181012 BRCA2-Halo PCNA-iRFP IR tracking	WT G10 +IR	775.1	0.000405469	0.0325642	1237	2
001 30ms181012 BRCA2-Halo PCNA-iRFP IR tracking	WT G10 +IR	776.1	1.00745	0.376765	1231	0
001 30ms181012 BRCA2-Halo PCNA-iRFP IR tracking	WT G10 +IR	778.1	0.000361686	0.145511	1262	2
001 30ms181012 BRCA2-Halo PCNA-iRFP IR tracking	WT G10 +IR	781.1	0.431471	0.554121	1266	0
001 30ms181012 BRCA2-Halo PCNA-iRFP IR tracking	WT G10 +IR	785.1	0.00108664	0.23129	1275	2
001 30ms181012 BRCA2-Halo PCNA-iRFP IR tracking	WT G10 +IR	787.2	0.014245	0.58899	1285	2
001 30ms181012 BRCA2-Halo PCNA-iRFP IR tracking	WT G10 +IR	791.1	0.00228727	0.212474	1299	2
001 30ms181012 BRCA2-Halo PCNA-iRFP IR tracking	WT G10 +IR	794.1	0.000575527	0.0364998	1305	2
001 30ms181012 BRCA2-Halo PCNA-iRFP IR tracking	WT G10 +IR	800.3	0.0198074	0.494832	1325	2
001 30ms181012 BRCA2-Halo PCNA-iRFP IR tracking	WT G10 +IR	802.2	0.111077	0.400291	1316	1
001 30ms181012 BRCA2-Halo PCNA-iRFP IR tracking	WT G10 +IR	802.3	1.32344	0.12024	1331	0
001 30ms181012 BRCA2-Halo PCNA-iRFP IR tracking	WT G10 +IR	804.1	0.890722	0.180767	1331	0
001 30ms181012 BRCA2-Halo PCNA-iRFP IR tracking	WT G10 +IR	812.1	0.334137	0.186513	1359	0
001 30ms181012 BRCA2-Halo PCNA-iRFP IR tracking	WT G10 +IR	812.2	0.154769	0.351148	1375	1
001 30ms181012 BRCA2-Halo PCNA-iRFP IR tracking	WT G10 +IR	815.2	0.00283081	0.208415	1362	2
001 30ms181012 BRCA2-Halo PCNA-iRFP IR tracking	WT G10 +IR	816.4	0.18189	0.609834	1401	1
001 30ms181012 BRCA2-Halo PCNA-iRFP IR tracking	WT G10 +IR	817.6	0.12568	0.4113	1423	1
001 30ms181012 BRCA2-Halo PCNA-iRFP IR tracking	WT G10 +IR	821.1	0.0029131	-0.0168434	1419	2
001 30ms181012 BRCA2-Halo PCNA-iRFP IR tracking	WT G10 +IR	824.1	1.16784	0.373016	1428	0
001 30ms181012 BRCA2-Halo PCNA-iRFP IR tracking	WT G10 +IR	824.3	2.21719	0.53976	1442	0
001 30ms181012 BRCA2-Halo PCNA-iRFP IR tracking	WT G10 +IR	825.1	0.00444646	-0.0320398	1424	2
001 30ms181012 BRCA2-Halo PCNA-iRFP IR tracking	WT G10 +IR	828.2	0.000208924	0.129991	1355	2
001 30ms181012 BRCA2-Halo PCNA-iRFP IR tracking	WT G10 +IR	832.1	0.00249385	0.213388	1409	2
001 30ms181012 BRCA2-Halo PCNA-iRFP IR tracking	WT G10 +IR	833.1	0.00244689	0.399201	1430	2
001 30ms181012 BRCA2-Halo PCNA-iRFP IR tracking	WT G10 +IR	834.1	0.00105118	0.0853972	1433	2
001 30ms181012 BRCA2-Halo PCNA-iRFP IR tracking	WT G10 +IR	834.3	0.00112683	0.124999	1460	2
001 30ms181012 BRCA2-Halo PCNA-iRFP IR tracking	WT G10 +IR	836.7	0.0183333	0.465862	1480	2
001 30ms181012 BRCA2-Halo PCNA-iRFP IR tracking	WT G10 +IR	842.1	0.000229705	0.0554206	1491	2
001 30ms181012 BRCA2-Halo PCNA-iRFP IR tracking	WT G10 +IR	843.1	0.000445725	0.0890071	1406	2
001 30ms181012 BRCA2-Halo PCNA-iRFP IR tracking	WT G10 +IR	845.2	0.0577266	0.321516	1507	1
001 30ms181012 BRCA2-Halo PCNA-iRFP IR tracking	WT G10 +IR	846.2	0.000714133	0.0546647	1426	2
001 30ms181012 BRCA2-Halo PCNA-iRFP IR tracking	WT G10 +IR	848.1	0.00143067	0.0433285	1512	2
001 30ms181012 BRCA2-Halo PCNA-iRFP IR tracking	WT G10 +IR	849.2	0.000573184	0.148195	1463	2
001 30ms181012 BRCA2-Halo PCNA-iRFP IR tracking	WT G10 +IR	849.4	0.0836777	0.179881	1494	1
001 30ms181012 BRCA2-Halo PCNA-iRFP IR tracking	WT G10 +IR	849.6	0.0484693	0.424645	1508	1
001 30ms181012 BRCA2-Halo PCNA-iRFP IR tracking	WT G10 +IR	850.1	1.34682	0.333106	1520	0
001 30ms181012 BRCA2-Halo PCNA-iRFP IR tracking	WT G10 +IR	852.1	0.00158769	0.105749	1514	2
001 30ms181012 BRCA2-Halo PCNA-iRFP IR tracking	WT G10 +IR	853.5	0.00286101	0.125503	1482	2
001 30ms181012 BRCA2-Halo PCNA-iRFP IR tracking	WT G10 +IR	853.6	0.00466172	0.049046	1493	1
001 30ms181012 BRCA2-Halo PCNA-iRFP IR tracking	WT G10 +IR	853.7	0.0111458	0.271639	1504	2
001 30ms181012 BRCA2-Halo PCNA-iRFP IR tracking	WT G10 +IR	853.8	0.00619592	0.0607414	1517	1
001 30ms181012 BRCA2-Halo PCNA-iRFP IR tracking	WT G10 +IR	854.1	0.00078716	-0.00853979	1438	2
001 30ms181012 BRCA2-Halo PCNA-iRFP IR tracking	WT G10 +IR	854.2	0.00178825	0.430873	1542	1
001 30ms181012 BRCA2-Halo PCNA-iRFP IR tracking	WT G10 +IR	855.1	0.000517119	0.160388	1506	2
001 30ms181012 BRCA2-Halo PCNA-iRFP IR tracking	WT G10 +IR	860.1	0.00115116	0.128545	1541	2
001 30ms181012 BRCA2-Halo PCNA-iRFP IR tracking	WT G10 +IR	861.1	0.000444192	0.0289811	1551	2
001 30ms181012 BRCA2-Halo PCNA-iRFP IR tracking	WT G10 +IR	862.2	0.000296826	-0.0574788	1583	2
001 30ms181012 BRCA2-Halo PCNA-iRFP IR tracking	WT G10 +IR	863.3	0.0456578	0.522596	1561	1
001 30ms181012 BRCA2-Halo PCNA-iRFP IR tracking	WT G10 +IR	864.3	0.0344338	0.334895	1583	1
001 30ms181012 BRCA2-Halo PCNA-iRFP IR tracking	WT G10 +IR	865.1	0.0668863	0.0730224	1583	0
001 30ms181012 BRCA2-Halo PCNA-iRFP IR tracking	WT G10 +IR	866.1	0.00256579	0.14819	1575	2
001 30ms181012 BRCA2-Halo PCNA-iRFP IR tracking	WT G10 +IR	866.3	0.00454755	0.222916	1592	2
001 30ms181012 BRCA2-Halo PCNA-iRFP IR tracking	WT G10 +IR	867.8	0.00236148	0.253429	1612	2
001 30ms181012 BRCA2-Halo PCNA-iRFP IR tracking	WT G10 +IR	868.3	0.110639	0.305544	1596	1
001 30ms181012 BRCA2-Halo PCNA-iRFP IR tracking	WT G10 +IR	872.2	0.00183671	0.0945413	1593	2
001 30ms181012 BRCA2-Halo PCNA-iRFP IR tracking	WT G10 +IR	873.4	0.0360522	0.185839	1615	1
001 30ms181012 BRCA2-Halo PCNA-iRFP IR tracking	WT G10 +IR	873.5	0.00455429	0.0788402	1626	2
001 30ms181012 BRCA2-Halo PCNA-iRFP IR tracking	WT G10 +IR	874.1	0.0027911	0.121238	1632	2
001 30ms181012 BRCA2-Halo PCNA-iRFP IR tracking	WT G10 +IR	877.1	0.000355607	0.044855	1564	2
001 30ms181012 BRCA2-Halo PCNA-iRFP IR tracking	WT G10 +IR	878.1	0.00388493	0.239096	1572	2
001 30ms181012 BRCA2-Halo PCNA-iRFP IR tracking	WT G10 +IR	884.1	1.55689	0.502266	1695	0
001 30ms181012 BRCA2-Halo PCNA-iRFP IR tracking	WT G10 +IR	886.2	0.164712	0.460044	1675	1
001 30ms181012 BRCA2-Halo PCNA-iRFP IR tracking	WT G10 +IR	886.5	0.0145005	0.281191	1699	2
001 30ms181012 BRCA2-Halo PCNA-iRFP IR tracking	WT G10 +IR	887.2	0.000495003	-0.0109836	1665	2
001 30ms181012 BRCA2-Halo PCNA-iRFP IR tracking	WT G10 +IR	892.1	0.00412349	0.416118	1708	2
001 30ms181012 BRCA2-Halo PCNA-iRFP IR tracking	WT G10 +IR	894.2	0.00365329	0.0278635	1676	2
001 30ms181012 BRCA2-Halo PCNA-iRFP IR tracking	WT G10 +IR	894.4	0.00435066	0.162671	1695	2
001 30ms181012 BRCA2-Halo PCNA-iRFP IR tracking	WT G10 +IR	894.9	0.00663871	0.0232962	1738	1
001 30ms181012 BRCA2-Halo PCNA-iRFP IR tracking	WT G10 +IR	895.1	0.000312148	0.123294	1651	2
001 30ms181012 BRCA2-Halo PCNA-iRFP IR tracking	WT G10 +IR	896.1	0.000897537	-0.0104855	1731	2
001 30ms181012 BRCA2-Halo PCNA-iRFP IR tracking	WT G10 +IR	899.1	0.000323365	0.0417474	1731	2
001 30ms181012 BRCA2-Halo PCNA-iRFP IR tracking	WT G10 +IR	901.1	0.000777204	0.139491	1657	2
001 30ms181012 BRCA2-Halo PCNA-iRFP IR tracking	WT G10 +IR	901.3	0.00154709	0.180127	1690	2
001 30ms181012 BRCA2-Halo PCNA-iRFP IR tracking	WT G10 +IR	902.1	0.00289048	0.171995	1710	2
001 30ms181012 BRCA2-Halo PCNA-iRFP IR tracking	WT G10 +IR	903.4	0.00731225	0.0810593	1775	2
001 30ms181012 BRCA2-Halo PCNA-iRFP IR tracking	WT G10 +IR	905.3	0.21062	0.405643	1787	1
001 30ms181012 BRCA2-Halo PCNA-iRFP IR tracking	WT G10 +IR	906.1	0.00318387	0.319953	1760	2
001 30ms181012 BRCA2-Halo PCNA-iRFP IR tracking	WT G10 +IR	907.1	0.0011806	-0.00404338	1766	2
001 30ms181012 BRCA2-Halo PCNA-iRFP IR tracking	WT G10 +IR	908.1	1.62745	0.63713	1784	0
001 30ms181012 BRCA2-Halo PCNA-iRFP IR tracking	WT G10 +IR	909.1	0.000423257	0.0658185	1585	2
001 30ms181012 BRCA2-Halo PCNA-iRFP IR tracking	WT G10 +IR	909.4	0.615945	0.317745	1695	0
001 30ms181012 BRCA2-Halo PCNA-iRFP IR tracking	WT G10 +IR	909.5	0.000159638	0.102753	1722	2
001 30ms181012 BRCA2-Halo PCNA-iRFP IR tracking	WT G10 +IR	909.7	0.000107383	-0.112138	1781	2
001 30ms181012 BRCA2-Halo PCNA-iRFP IR tracking	WT G10 +IR	911.1	0.055491	0.484257	1768	1
001 30ms181012 BRCA2-Halo PCNA-iRFP IR tracking	WT G10 +IR	911.2	0.0213758	0.529914	1794	2
001 30ms181012 BRCA2-Halo PCNA-iRFP IR tracking	WT G10 +IR	911.3	0.044094	0.488234	1806	1
001 30ms181012 BRCA2-Halo PCNA-iRFP IR tracking	WT G10 +IR	912.1	1.14673	0.50534	1811	0
001 30ms181012 BRCA2-Halo PCNA-iRFP IR tracking	WT G10 +IR	916.1	0.677294	0.198284	1844	0
001 30ms181012 BRCA2-Halo PCNA-iRFP IR tracking	WT G10 +IR	917.1	0.00230238	0.296888	1852	2
001 30ms181012 BRCA2-Halo PCNA-iRFP IR tracking	WT G10 +IR	918.1	0.000991681	0.148616	1731	2
001 30ms181012 BRCA2-Halo PCNA-iRFP IR tracking	WT G10 +IR	923.1	0.887682	0.333663	1864	0
001 30ms181012 BRCA2-Halo PCNA-iRFP IR tracking	WT G10 +IR	923.5	0.261129	0.402787	1887	0
001 30ms181012 BRCA2-Halo PCNA-iRFP IR tracking	WT G10 +IR	924.1	0.00147481	0.193059	1861	2
001 30ms181012 BRCA2-Halo PCNA-iRFP IR tracking	WT G10 +IR	927.1	0.00229619	0.297165	1875	2
001 30ms181012 BRCA2-Halo PCNA-iRFP IR tracking	WT G10 +IR	928.3	0.0001014	0.0651536	1950	2
001 30ms181012 BRCA2-Halo PCNA-iRFP IR tracking	WT G10 +IR	931.1	0.00135175	-0.151177	1882	2
001 30ms181012 BRCA2-Halo PCNA-iRFP IR tracking	WT G10 +IR	932.1	0.000233064	0.0625226	1794	2
001 30ms181012 BRCA2-Halo PCNA-iRFP IR tracking	WT G10 +IR	933.1	0.000684589	0.208557	1882	2
001 30ms181012 BRCA2-Halo PCNA-iRFP IR tracking	WT G10 +IR	934.2	0.0133451	0.460478	1825	2
001 30ms181012 BRCA2-Halo PCNA-iRFP IR tracking	WT G10 +IR	935.1	0.00516457	0.16241	1899	2
001 30ms181012 BRCA2-Halo PCNA-iRFP IR tracking	WT G10 +IR	935.4	0.0125861	0.250682	1921	1
001 30ms181012 BRCA2-Halo PCNA-iRFP IR tracking	WT G10 +IR	936.2	0.0671042	0.442225	1880	1
001 30ms181012 BRCA2-Halo PCNA-iRFP IR tracking	WT G10 +IR	940.16	0.485024	0.432063	1941	2
001 30ms181012 BRCA2-Halo PCNA-iRFP IR tracking	WT G10 +IR	940.2	0.438798	0.382372	1972	1
001 30ms181012 BRCA2-Halo PCNA-iRFP IR tracking	WT G10 +IR	945.2	0.00175844	0.0494339	1930	2
001 30ms181012 BRCA2-Halo PCNA-iRFP IR tracking	WT G10 +IR	947.1	0.00793666	0.0348907	1954	2
001 30ms181012 BRCA2-Halo PCNA-iRFP IR tracking	WT G10 +IR	948.1	0.00383187	-0.0816324	1961	2
001 30ms181012 BRCA2-Halo PCNA-iRFP IR tracking	WT G10 +IR	949.2	0.00488648	0.289936	1955	2
001 30ms181012 BRCA2-Halo PCNA-iRFP IR tracking	WT G10 +IR	950.1	0.0115876	0.364743	1963	2
001 30ms181012 BRCA2-Halo PCNA-iRFP IR tracking	WT G10 +IR	951.1	0.000425908	0.125185	1909	2
001 30ms181012 BRCA2-Halo PCNA-iRFP IR tracking	WT G10 +IR	952.2	0.00293795	0.342388	1929	2
001 30ms181012 BRCA2-Halo PCNA-iRFP IR tracking	WT G10 +IR	953.1	0.000537402	0.0703639	1956	2
001 30ms181012 BRCA2-Halo PCNA-iRFP IR tracking	WT G10 +IR	956.1	0.000510739	0.0531898	1961	2
001 30ms181012 BRCA2-Halo PCNA-iRFP IR tracking	WT G10 +IR	957.1	0.00152363	0.151264	1952	2
001 30ms181012 BRCA2-Halo PCNA-iRFP IR tracking	WT G10 +IR	958.1	0.00260592	0.0759546	1934	2
001 30ms181012 BRCA2-Halo PCNA-iRFP IR tracking	WT G10 +IR	959.1	0.000554275	0.16	1967	2
002 30ms181005 BRCA2-Halo PCNA-iRFP IR tracking	WT G10 +IR	9.1	0.562165	0.0540031	0	0
002 30ms181005 BRCA2-Halo PCNA-iRFP IR tracking	WT G10 +IR	11.2	0.009709	-0.186031	10	0
002 30ms181005 BRCA2-Halo PCNA-iRFP IR tracking	WT G10 +IR	12.1	2.3037	0.270528	1	0
002 30ms181005 BRCA2-Halo PCNA-iRFP IR tracking	WT G10 +IR	14.1	2.28964	0.458046	0	0
002 30ms181005 BRCA2-Halo PCNA-iRFP IR tracking	WT G10 +IR	22.1	0.635953	0.490975	0	0
002 30ms181005 BRCA2-Halo PCNA-iRFP IR tracking	WT G10 +IR	23.1	0.0198898	0.265333	0	1
002 30ms181005 BRCA2-Halo PCNA-iRFP IR tracking	WT G10 +IR	24.1	0.00426664	0.0361063	0	2
002 30ms181005 BRCA2-Halo PCNA-iRFP IR tracking	WT G10 +IR	27.1	1.69699	0.523955	0	0
002 30ms181005 BRCA2-Halo PCNA-iRFP IR tracking	WT G10 +IR	28.3	0.540755	0.181601	20	0
002 30ms181005 BRCA2-Halo PCNA-iRFP IR tracking	WT G10 +IR	31.1	0.00209658	-0.0111634	0	2
002 30ms181005 BRCA2-Halo PCNA-iRFP IR tracking	WT G10 +IR	32.1	1.2711	0.326842	10	0
002 30ms181005 BRCA2-Halo PCNA-iRFP IR tracking	WT G10 +IR	33.1	3.27412	0.639353	25	0
002 30ms181005 BRCA2-Halo PCNA-iRFP IR tracking	WT G10 +IR	33.1	0.474213	0.109554	140	0
002 30ms181005 BRCA2-Halo PCNA-iRFP IR tracking	WT G10 +IR	33.3	0.166693	0.542832	61	1
002 30ms181005 BRCA2-Halo PCNA-iRFP IR tracking	WT G10 +IR	33.5	0.125446	0.338054	85	1
002 30ms181005 BRCA2-Halo PCNA-iRFP IR tracking	WT G10 +IR	43.1	0.00129235	0.190935	0	2
002 30ms181005 BRCA2-Halo PCNA-iRFP IR tracking	WT G10 +IR	47.4	0.0704341	0.274187	37	1
002 30ms181005 BRCA2-Halo PCNA-iRFP IR tracking	WT G10 +IR	50.1	1.82389	0.337192	35	0
002 30ms181005 BRCA2-Halo PCNA-iRFP IR tracking	WT G10 +IR	51.1	0.489266	-0.0405204	12	0
002 30ms181005 BRCA2-Halo PCNA-iRFP IR tracking	WT G10 +IR	51.3	0.00562648	0.357007	29	2
002 30ms181005 BRCA2-Halo PCNA-iRFP IR tracking	WT G10 +IR	51.5	1.39083	0.474472	45	0
002 30ms181005 BRCA2-Halo PCNA-iRFP IR tracking	WT G10 +IR	53.2	0.0324866	0.115328	29	1
002 30ms181005 BRCA2-Halo PCNA-iRFP IR tracking	WT G10 +IR	53.3	1.64456	0.28284	45	0
002 30ms181005 BRCA2-Halo PCNA-iRFP IR tracking	WT G10 +IR	54.1	1.34135	0.305722	48	0
002 30ms181005 BRCA2-Halo PCNA-iRFP IR tracking	WT G10 +IR	56.2	0.00133267	-0.110711	56	1
002 30ms181005 BRCA2-Halo PCNA-iRFP IR tracking	WT G10 +IR	57.1	0.0013249	0.148005	48	2
002 30ms181005 BRCA2-Halo PCNA-iRFP IR tracking	WT G10 +IR	62.19	0.023872	0.0437297	114	2
002 30ms181005 BRCA2-Halo PCNA-iRFP IR tracking	WT G10 +IR	64.1	0.000771357	0.0216673	128	2
002 30ms181005 BRCA2-Halo PCNA-iRFP IR tracking	WT G10 +IR	64.2	1.29662	0.0146689	62	0
002 30ms181005 BRCA2-Halo PCNA-iRFP IR tracking	WT G10 +IR	64.3	0.00156161	0.0179167	74	2
002 30ms181005 BRCA2-Halo PCNA-iRFP IR tracking	WT G10 +IR	64.5	0.000818293	-0.0381401	93	2
002 30ms181005 BRCA2-Halo PCNA-iRFP IR tracking	WT G10 +IR	65.1	0.0058092	0.11462	56	1
002 30ms181005 BRCA2-Halo PCNA-iRFP IR tracking	WT G10 +IR	66.3	1.97108	0.427624	62	0
002 30ms181005 BRCA2-Halo PCNA-iRFP IR tracking	WT G10 +IR	69.5	0.00153641	-0.0135168	73	1
002 30ms181005 BRCA2-Halo PCNA-iRFP IR tracking	WT G10 +IR	71.3	0.822238	0.448698	53	0
002 30ms181005 BRCA2-Halo PCNA-iRFP IR tracking	WT G10 +IR	79.1	0.0303273	0.182015	66	1
002 30ms181005 BRCA2-Halo PCNA-iRFP IR tracking	WT G10 +IR	79.12	0.152542	0.677789	125	2
002 30ms181005 BRCA2-Halo PCNA-iRFP IR tracking	WT G10 +IR	79.13	0.0231628	0.296357	136	0
002 30ms181005 BRCA2-Halo PCNA-iRFP IR tracking	WT G10 +IR	86.3	0.0083058	0.277259	69	2
002 30ms181005 BRCA2-Halo PCNA-iRFP IR tracking	WT G10 +IR	88.2	0.0077341	0.42431	22	2
002 30ms181005 BRCA2-Halo PCNA-iRFP IR tracking	WT G10 +IR	88.4	0.00496951	0.20182	37	2
002 30ms181005 BRCA2-Halo PCNA-iRFP IR tracking	WT G10 +IR	91.16	0.0125545	0.395731	156	2
002 30ms181005 BRCA2-Halo PCNA-iRFP IR tracking	WT G10 +IR	91.5	0.0432664	0.623269	83	2
002 30ms181005 BRCA2-Halo PCNA-iRFP IR tracking	WT G10 +IR	91.6	0.0420878	0.16412	97	1
002 30ms181005 BRCA2-Halo PCNA-iRFP IR tracking	WT G10 +IR	91.9	0.0111812	0.195979	118	2
002 30ms181005 BRCA2-Halo PCNA-iRFP IR tracking	WT G10 +IR	93.2	0.170605	0.553972	25	1
002 30ms181005 BRCA2-Halo PCNA-iRFP IR tracking	WT G10 +IR	93.4	0.139448	0.388682	49	1
002 30ms181005 BRCA2-Halo PCNA-iRFP IR tracking	WT G10 +IR	93.7	0.0268123	-0.0472839	77	1
002 30ms181005 BRCA2-Halo PCNA-iRFP IR tracking	WT G10 +IR	94.12	0.0400929	-0.015457	106	1
002 30ms181005 BRCA2-Halo PCNA-iRFP IR tracking	WT G10 +IR	94.4	0.0370244	0.625837	68	1
002 30ms181005 BRCA2-Halo PCNA-iRFP IR tracking	WT G10 +IR	94.5	0.0171356	0.328789	81	2
002 30ms181005 BRCA2-Halo PCNA-iRFP IR tracking	WT G10 +IR	96.1	0.0277975	0.212994	5	1
002 30ms181005 BRCA2-Halo PCNA-iRFP IR tracking	WT G10 +IR	96.3	0.0784478	0.440449	48	1
002 30ms181005 BRCA2-Halo PCNA-iRFP IR tracking	WT G10 +IR	96.5	0.0974265	0.484136	73	1
002 30ms181005 BRCA2-Halo PCNA-iRFP IR tracking	WT G10 +IR	98.4	0.0680912	0.344356	41	1
002 30ms181005 BRCA2-Halo PCNA-iRFP IR tracking	WT G10 +IR	98.5	0.369532	0.404675	53	0
002 30ms181005 BRCA2-Halo PCNA-iRFP IR tracking	WT G10 +IR	98.8	0.0583493	0.277428	74	1
002 30ms181005 BRCA2-Halo PCNA-iRFP IR tracking	WT G10 +IR	99.1	0.000801902	0.151385	0	2
002 30ms181005 BRCA2-Halo PCNA-iRFP IR tracking	WT G10 +IR	103.1	0.00280323	0.323401	73	2
002 30ms181005 BRCA2-Halo PCNA-iRFP IR tracking	WT G10 +IR	105.1	0.00103368	0.241963	0	2
002 30ms181005 BRCA2-Halo PCNA-iRFP IR tracking	WT G10 +IR	109.1	0.000913285	0.0526672	0	2
002 30ms181005 BRCA2-Halo PCNA-iRFP IR tracking	WT G10 +IR	111.2	0.00520636	0.22845	77	2
002 30ms181005 BRCA2-Halo PCNA-iRFP IR tracking	WT G10 +IR	113.1	1.27208	0.139392	104	0
002 30ms181005 BRCA2-Halo PCNA-iRFP IR tracking	WT G10 +IR	114.1	0.00710706	0.350223	0	2
002 30ms181005 BRCA2-Halo PCNA-iRFP IR tracking	WT G10 +IR	114.3	0.00645885	0.278047	51	2
002 30ms181005 BRCA2-Halo PCNA-iRFP IR tracking	WT G10 +IR	116.2	0.000142763	-0.0103747	83	2
002 30ms181005 BRCA2-Halo PCNA-iRFP IR tracking	WT G10 +IR	117.1	0.00247745	0.111151	88	2
002 30ms181005 BRCA2-Halo PCNA-iRFP IR tracking	WT G10 +IR	119.1	0.0105512	0.019334	109	1
002 30ms181005 BRCA2-Halo PCNA-iRFP IR tracking	WT G10 +IR	123.1	1.56918	0.549968	106	0
002 30ms181005 BRCA2-Halo PCNA-iRFP IR tracking	WT G10 +IR	126.1	0.000591963	0.192623	98	2
002 30ms181005 BRCA2-Halo PCNA-iRFP IR tracking	WT G10 +IR	130.2	0.0199125	0.176094	115	1
002 30ms181005 BRCA2-Halo PCNA-iRFP IR tracking	WT G10 +IR	137.2	0.00401623	0.272117	104	2
002 30ms181005 BRCA2-Halo PCNA-iRFP IR tracking	WT G10 +IR	138.5	2.27306	0.533037	119	0
002 30ms181005 BRCA2-Halo PCNA-iRFP IR tracking	WT G10 +IR	139.1	0.259543	0.257574	110	0
002 30ms181005 BRCA2-Halo PCNA-iRFP IR tracking	WT G10 +IR	144.1	2.15322	0.387024	118	0
002 30ms181005 BRCA2-Halo PCNA-iRFP IR tracking	WT G10 +IR	145.4	0.357479	0.63135	130	1
002 30ms181005 BRCA2-Halo PCNA-iRFP IR tracking	WT G10 +IR	145.7	1.26273	0.427501	156	0
002 30ms181005 BRCA2-Halo PCNA-iRFP IR tracking	WT G10 +IR	146.1	0.52403	0.0656369	125	0
002 30ms181005 BRCA2-Halo PCNA-iRFP IR tracking	WT G10 +IR	152.3	0.00803121	0.192878	114	1
002 30ms181005 BRCA2-Halo PCNA-iRFP IR tracking	WT G10 +IR	153.1	5.58496	0.660208	133	0
002 30ms181005 BRCA2-Halo PCNA-iRFP IR tracking	WT G10 +IR	156.1	0.000944597	0.195428	69	2
002 30ms181005 BRCA2-Halo PCNA-iRFP IR tracking	WT G10 +IR	160.3	0.731295	0.124549	152	0
002 30ms181005 BRCA2-Halo PCNA-iRFP IR tracking	WT G10 +IR	160.5	0.470592	0.139094	168	0
002 30ms181005 BRCA2-Halo PCNA-iRFP IR tracking	WT G10 +IR	162.6	0.0211548	0.258068	135	1
002 30ms181005 BRCA2-Halo PCNA-iRFP IR tracking	WT G10 +IR	171.3	1.16435	0.5771	88	0
002 30ms181005 BRCA2-Halo PCNA-iRFP IR tracking	WT G10 +IR	171.6	0.881641	0.110824	107	0
002 30ms181005 BRCA2-Halo PCNA-iRFP IR tracking	WT G10 +IR	171.8	0.434625	0.608762	140	0
002 30ms181005 BRCA2-Halo PCNA-iRFP IR tracking	WT G10 +IR	171.9	0.0491966	0.42825	152	1
002 30ms181005 BRCA2-Halo PCNA-iRFP IR tracking	WT G10 +IR	172.1	0.0797327	0.256345	159	1
002 30ms181005 BRCA2-Halo PCNA-iRFP IR tracking	WT G10 +IR	173.4	0.0213517	0.173471	177	1
002 30ms181005 BRCA2-Halo PCNA-iRFP IR tracking	WT G10 +IR	179.3	0.0108285	0.406241	141	2
002 30ms181005 BRCA2-Halo PCNA-iRFP IR tracking	WT G10 +IR	180.1	0.00132217	0.329682	114	2
002 30ms181005 BRCA2-Halo PCNA-iRFP IR tracking	WT G10 +IR	180.3	0.00109584	0.0839545	236	2
002 30ms181005 BRCA2-Halo PCNA-iRFP IR tracking	WT G10 +IR	182.2	0.000989657	0.0566922	163	2
002 30ms181005 BRCA2-Halo PCNA-iRFP IR tracking	WT G10 +IR	186.1	0.000864474	0.1487	171	2
002 30ms181005 BRCA2-Halo PCNA-iRFP IR tracking	WT G10 +IR	187.1	0.421814	0.355375	141	0
002 30ms181005 BRCA2-Halo PCNA-iRFP IR tracking	WT G10 +IR	188.8	1.52136	0.72549	165	0
002 30ms181005 BRCA2-Halo PCNA-iRFP IR tracking	WT G10 +IR	194.1	3.57095	0.346186	187	0
002 30ms181005 BRCA2-Halo PCNA-iRFP IR tracking	WT G10 +IR	198.2	0.00957272	0.315666	204	2
002 30ms181005 BRCA2-Halo PCNA-iRFP IR tracking	WT G10 +IR	199.3	0.58121	0.603359	197	0
002 30ms181005 BRCA2-Halo PCNA-iRFP IR tracking	WT G10 +IR	207.1	1.30505	0.305843	221	0
002 30ms181005 BRCA2-Halo PCNA-iRFP IR tracking	WT G10 +IR	210.1	0.00176833	0.152847	216	2
002 30ms181005 BRCA2-Halo PCNA-iRFP IR tracking	WT G10 +IR	211.2	0.0017781	0.282416	227	2
002 30ms181005 BRCA2-Halo PCNA-iRFP IR tracking	WT G10 +IR	212.1	0.00324285	0.148324	214	2
002 30ms181005 BRCA2-Halo PCNA-iRFP IR tracking	WT G10 +IR	214.2	0.0635525	0.436543	221	1
002 30ms181005 BRCA2-Halo PCNA-iRFP IR tracking	WT G10 +IR	215.2	8.40961e-05	0.0497924	208	1
002 30ms181005 BRCA2-Halo PCNA-iRFP IR tracking	WT G10 +IR	217.5	0.98508	0.449591	218	0
002 30ms181005 BRCA2-Halo PCNA-iRFP IR tracking	WT G10 +IR	218.1	0.122471	0.0392971	225	0
002 30ms181005 BRCA2-Halo PCNA-iRFP IR tracking	WT G10 +IR	224.8	0.117669	0.26705	206	1
002 30ms181005 BRCA2-Halo PCNA-iRFP IR tracking	WT G10 +IR	226.1	1.22125	0.40652	242	0
002 30ms181005 BRCA2-Halo PCNA-iRFP IR tracking	WT G10 +IR	228.1	2.60956	0.556701	221	0
002 30ms181005 BRCA2-Halo PCNA-iRFP IR tracking	WT G10 +IR	228.7	1.50531	0.421237	253	0
002 30ms181005 BRCA2-Halo PCNA-iRFP IR tracking	WT G10 +IR	231.1	3.68479	0.431754	251	0
002 30ms181005 BRCA2-Halo PCNA-iRFP IR tracking	WT G10 +IR	232.2	1.02854	0.548891	243	0
002 30ms181005 BRCA2-Halo PCNA-iRFP IR tracking	WT G10 +IR	234.2	0.276365	0.598087	253	1
002 30ms181005 BRCA2-Halo PCNA-iRFP IR tracking	WT G10 +IR	234.3	0.465504	0.222359	265	0
002 30ms181005 BRCA2-Halo PCNA-iRFP IR tracking	WT G10 +IR	235.1	0.971395	0.101647	253	0
002 30ms181005 BRCA2-Halo PCNA-iRFP IR tracking	WT G10 +IR	239.1	0.000577494	0.108486	314	2
002 30ms181005 BRCA2-Halo PCNA-iRFP IR tracking	WT G10 +IR	239.6	0.00175839	0.154867	274	2
002 30ms181005 BRCA2-Halo PCNA-iRFP IR tracking	WT G10 +IR	241.1	1.31405	0.488388	247	0
002 30ms181005 BRCA2-Halo PCNA-iRFP IR tracking	WT G10 +IR	242.5	0.631206	0.00781073	275	0
002 30ms181005 BRCA2-Halo PCNA-iRFP IR tracking	WT G10 +IR	243.1	2.55086	0.404719	255	0
002 30ms181005 BRCA2-Halo PCNA-iRFP IR tracking	WT G10 +IR	248.1	0.000795072	0.0913769	267	2
002 30ms181005 BRCA2-Halo PCNA-iRFP IR tracking	WT G10 +IR	249.21	0.019505	0.115338	331	1
002 30ms181005 BRCA2-Halo PCNA-iRFP IR tracking	WT G10 +IR	249.29	0.533279	0.488945	368	0
002 30ms181005 BRCA2-Halo PCNA-iRFP IR tracking	WT G10 +IR	249.32	0.219953	0.030154	391	1
002 30ms181005 BRCA2-Halo PCNA-iRFP IR tracking	WT G10 +IR	249.4	1.42675	0.387675	258	0
002 30ms181005 BRCA2-Halo PCNA-iRFP IR tracking	WT G10 +IR	249.8	3.1878	0.49833	281	0
002 30ms181005 BRCA2-Halo PCNA-iRFP IR tracking	WT G10 +IR	250.6	0.217259	0.444445	264	0
002 30ms181005 BRCA2-Halo PCNA-iRFP IR tracking	WT G10 +IR	252.3	3.38802	0.567892	268	0
002 30ms181005 BRCA2-Halo PCNA-iRFP IR tracking	WT G10 +IR	253.4	2.23565	0.357605	289	0
002 30ms181005 BRCA2-Halo PCNA-iRFP IR tracking	WT G10 +IR	256.1	0.00263494	-0.0380324	282	2
002 30ms181005 BRCA2-Halo PCNA-iRFP IR tracking	WT G10 +IR	257.1	1.24642	0.723114	273	0
002 30ms181005 BRCA2-Halo PCNA-iRFP IR tracking	WT G10 +IR	257.7	0.426691	0.258906	293	0
002 30ms181005 BRCA2-Halo PCNA-iRFP IR tracking	WT G10 +IR	258.1	0.831308	0.455205	265	0
002 30ms181005 BRCA2-Halo PCNA-iRFP IR tracking	WT G10 +IR	258.3	1.74084	0.335148	279	0
002 30ms181005 BRCA2-Halo PCNA-iRFP IR tracking	WT G10 +IR	259.11	0.0334404	0.328708	264	0
002 30ms181005 BRCA2-Halo PCNA-iRFP IR tracking	WT G10 +IR	259.5	0.00114461	0.14241	204	2
002 30ms181005 BRCA2-Halo PCNA-iRFP IR tracking	WT G10 +IR	261.3	1.32256	0.335756	303	0
002 30ms181005 BRCA2-Halo PCNA-iRFP IR tracking	WT G10 +IR	263.1	1.41919	0.192505	284	0
002 30ms181005 BRCA2-Halo PCNA-iRFP IR tracking	WT G10 +IR	263.2	0.184295	0.354247	301	1
002 30ms181005 BRCA2-Halo PCNA-iRFP IR tracking	WT G10 +IR	266.1	1.31364	0.431578	298	0
002 30ms181005 BRCA2-Halo PCNA-iRFP IR tracking	WT G10 +IR	268.1	0.0124972	0.17715	299	1
002 30ms181005 BRCA2-Halo PCNA-iRFP IR tracking	WT G10 +IR	271.1	0.48725	0.204557	315	0
002 30ms181005 BRCA2-Halo PCNA-iRFP IR tracking	WT G10 +IR	272.1	0.0242588	0.219615	309	1
002 30ms181005 BRCA2-Halo PCNA-iRFP IR tracking	WT G10 +IR	273.5	0.0230269	0.206238	327	1
002 30ms181005 BRCA2-Halo PCNA-iRFP IR tracking	WT G10 +IR	276.2	0.000951244	0.160922	255	2
002 30ms181005 BRCA2-Halo PCNA-iRFP IR tracking	WT G10 +IR	279.4	1.1431	0.353362	335	0
002 30ms181005 BRCA2-Halo PCNA-iRFP IR tracking	WT G10 +IR	280.1	2.21754	0.563201	291	0
002 30ms181005 BRCA2-Halo PCNA-iRFP IR tracking	WT G10 +IR	281.2	0.217588	0.657711	300	1
002 30ms181005 BRCA2-Halo PCNA-iRFP IR tracking	WT G10 +IR	291.1	0.106677	0.468337	337	1
002 30ms181005 BRCA2-Halo PCNA-iRFP IR tracking	WT G10 +IR	291.5	0.11202	0.48563	372	1
002 30ms181005 BRCA2-Halo PCNA-iRFP IR tracking	WT G10 +IR	295.3	2.06825	0.674409	346	0
002 30ms181005 BRCA2-Halo PCNA-iRFP IR tracking	WT G10 +IR	298.1	4.66953	0.600417	350	0
002 30ms181005 BRCA2-Halo PCNA-iRFP IR tracking	WT G10 +IR	299.3	2.28303	0.492386	353	0
002 30ms181005 BRCA2-Halo PCNA-iRFP IR tracking	WT G10 +IR	302.8	0.00207208	0.15608	362	2
002 30ms181005 BRCA2-Halo PCNA-iRFP IR tracking	WT G10 +IR	305.1	0.408453	0.701681	339	0
002 30ms181005 BRCA2-Halo PCNA-iRFP IR tracking	WT G10 +IR	305.3	1.72526	0.273788	356	0
002 30ms181005 BRCA2-Halo PCNA-iRFP IR tracking	WT G10 +IR	307.1	0.0102688	0.434522	370	2
002 30ms181005 BRCA2-Halo PCNA-iRFP IR tracking	WT G10 +IR	310.1	0.880118	0.539251	310	0
002 30ms181005 BRCA2-Halo PCNA-iRFP IR tracking	WT G10 +IR	310.2	0.0177416	0.255923	339	2
002 30ms181005 BRCA2-Halo PCNA-iRFP IR tracking	WT G10 +IR	312.1	0.00319035	0.239627	376	2
002 30ms181005 BRCA2-Halo PCNA-iRFP IR tracking	WT G10 +IR	314.2	0.122725	0.421892	323	1
002 30ms181005 BRCA2-Halo PCNA-iRFP IR tracking	WT G10 +IR	314.4	0.21074	0.474486	347	1
002 30ms181005 BRCA2-Halo PCNA-iRFP IR tracking	WT G10 +IR	314.6	0.0701383	0.395456	366	1
002 30ms181005 BRCA2-Halo PCNA-iRFP IR tracking	WT G10 +IR	316.1	3.1803	0.509981	378	0
002 30ms181005 BRCA2-Halo PCNA-iRFP IR tracking	WT G10 +IR	318.8	0.00643953	0.103113	384	1
002 30ms181005 BRCA2-Halo PCNA-iRFP IR tracking	WT G10 +IR	321.1	0.0002362	0.151888	378	2
002 30ms181005 BRCA2-Halo PCNA-iRFP IR tracking	WT G10 +IR	324.1	0.00286277	0.150823	313	2
002 30ms181005 BRCA2-Halo PCNA-iRFP IR tracking	WT G10 +IR	325.2	0.00129944	0.0195999	393	1
002 30ms181005 BRCA2-Halo PCNA-iRFP IR tracking	WT G10 +IR	326.1	1.25159	0.451579	355	0
002 30ms181005 BRCA2-Halo PCNA-iRFP IR tracking	WT G10 +IR	328.3	2.76369	0.366297	402	0
002 30ms181005 BRCA2-Halo PCNA-iRFP IR tracking	WT G10 +IR	330.1	0.0075745	0.241203	417	2
002 30ms181005 BRCA2-Halo PCNA-iRFP IR tracking	WT G10 +IR	331.2	0.911581	0.245373	390	2
002 30ms181005 BRCA2-Halo PCNA-iRFP IR tracking	WT G10 +IR	332.1	0.0655967	0.109634	407	1
002 30ms181005 BRCA2-Halo PCNA-iRFP IR tracking	WT G10 +IR	336.5	0.0012168	0.162319	378	2
002 30ms181005 BRCA2-Halo PCNA-iRFP IR tracking	WT G10 +IR	336.9	0.00160278	0.0708612	428	2
002 30ms181005 BRCA2-Halo PCNA-iRFP IR tracking	WT G10 +IR	337.1	0.0835369	-0.00249126	403	2
002 30ms181005 BRCA2-Halo PCNA-iRFP IR tracking	WT G10 +IR	342.3	0.680636	0.221932	386	0
002 30ms181005 BRCA2-Halo PCNA-iRFP IR tracking	WT G10 +IR	342.5	0.908032	0.511929	428	0
002 30ms181005 BRCA2-Halo PCNA-iRFP IR tracking	WT G10 +IR	344.2	0.00446892	0.342758	420	2
002 30ms181005 BRCA2-Halo PCNA-iRFP IR tracking	WT G10 +IR	346.3	0.0687496	0.354567	462	1
002 30ms181005 BRCA2-Halo PCNA-iRFP IR tracking	WT G10 +IR	347.1	0.995369	0.117529	445	0
002 30ms181005 BRCA2-Halo PCNA-iRFP IR tracking	WT G10 +IR	348.1	0.868903	0.376987	440	0
002 30ms181005 BRCA2-Halo PCNA-iRFP IR tracking	WT G10 +IR	351.2	0.0280664	0.192902	441	1
002 30ms181005 BRCA2-Halo PCNA-iRFP IR tracking	WT G10 +IR	354.1	0.00252441	0.113341	450	2
002 30ms181005 BRCA2-Halo PCNA-iRFP IR tracking	WT G10 +IR	356.1	0.602242	0.238357	446	0
002 30ms181005 BRCA2-Halo PCNA-iRFP IR tracking	WT G10 +IR	357.1	0.281531	-0.00498813	456	0
002 30ms181005 BRCA2-Halo PCNA-iRFP IR tracking	WT G10 +IR	358.2	0.0006162	0.0593806	413	2
002 30ms181005 BRCA2-Halo PCNA-iRFP IR tracking	WT G10 +IR	363.1	0.868222	0.177599	464	0
002 30ms181005 BRCA2-Halo PCNA-iRFP IR tracking	WT G10 +IR	364.2	0.0655477	0.414948	466	1
002 30ms181005 BRCA2-Halo PCNA-iRFP IR tracking	WT G10 +IR	365.1	1.81432	0.395132	469	0
002 30ms181005 BRCA2-Halo PCNA-iRFP IR tracking	WT G10 +IR	367.5	0.133429	0.388686	452	1
002 30ms181005 BRCA2-Halo PCNA-iRFP IR tracking	WT G10 +IR	370.1	0.000763552	0.151973	474	2
002 30ms181005 BRCA2-Halo PCNA-iRFP IR tracking	WT G10 +IR	372.1	0.964084	0.635003	490	0
002 30ms181005 BRCA2-Halo PCNA-iRFP IR tracking	WT G10 +IR	374.3	0.43277	0.436311	444	0
002 30ms181005 BRCA2-Halo PCNA-iRFP IR tracking	WT G10 +IR	377.1	0.537468	0.315982	465	0
002 30ms181005 BRCA2-Halo PCNA-iRFP IR tracking	WT G10 +IR	377.2	0.0112013	0.143024	486	1
002 30ms181005 BRCA2-Halo PCNA-iRFP IR tracking	WT G10 +IR	378.6	0.0109056	0.464803	481	2
002 30ms181005 BRCA2-Halo PCNA-iRFP IR tracking	WT G10 +IR	383.2	1.42514	0.583435	469	0
002 30ms181005 BRCA2-Halo PCNA-iRFP IR tracking	WT G10 +IR	383.3	0.00299536	0.0342921	494	1
002 30ms181005 BRCA2-Halo PCNA-iRFP IR tracking	WT G10 +IR	384.1	0.000841375	0.0982542	448	2
002 30ms181005 BRCA2-Halo PCNA-iRFP IR tracking	WT G10 +IR	385.3	0.610583	0.164495	516	0
002 30ms181005 BRCA2-Halo PCNA-iRFP IR tracking	WT G10 +IR	387.1	0.00316534	0.183561	411	2
002 30ms181005 BRCA2-Halo PCNA-iRFP IR tracking	WT G10 +IR	387.11	0.345483	0.514126	511	0
002 30ms181005 BRCA2-Halo PCNA-iRFP IR tracking	WT G10 +IR	387.3	0.00408286	0.0694868	437	2
002 30ms181005 BRCA2-Halo PCNA-iRFP IR tracking	WT G10 +IR	387.5	0.761583	0.156984	469	0
002 30ms181005 BRCA2-Halo PCNA-iRFP IR tracking	WT G10 +IR	390.1	0.21062	0.576655	498	1
002 30ms181005 BRCA2-Halo PCNA-iRFP IR tracking	WT G10 +IR	391.5	0.787504	0.50066	508	0
002 30ms181005 BRCA2-Halo PCNA-iRFP IR tracking	WT G10 +IR	393.1	0.00166189	0.0806653	443	2
002 30ms181005 BRCA2-Halo PCNA-iRFP IR tracking	WT G10 +IR	396.4	0.0100245	0.279921	452	2
002 30ms181005 BRCA2-Halo PCNA-iRFP IR tracking	WT G10 +IR	396.7	0.0100019	0.318119	477	2
002 30ms181005 BRCA2-Halo PCNA-iRFP IR tracking	WT G10 +IR	396.8	0.0807796	0.187604	493	1
002 30ms181005 BRCA2-Halo PCNA-iRFP IR tracking	WT G10 +IR	396.9	0.00344989	0.225366	508	2
002 30ms181005 BRCA2-Halo PCNA-iRFP IR tracking	WT G10 +IR	397.2	0.246937	0.470907	523	1
002 30ms181005 BRCA2-Halo PCNA-iRFP IR tracking	WT G10 +IR	400.5	0.204593	-0.145947	537	0
002 30ms181005 BRCA2-Halo PCNA-iRFP IR tracking	WT G10 +IR	402.1	0.202202	0.554843	529	1
002 30ms181005 BRCA2-Halo PCNA-iRFP IR tracking	WT G10 +IR	403.1	0.881185	0.534798	521	0
002 30ms181005 BRCA2-Halo PCNA-iRFP IR tracking	WT G10 +IR	404.1	2.04291	0.666891	530	0
002 30ms181005 BRCA2-Halo PCNA-iRFP IR tracking	WT G10 +IR	405.1	0.000583361	-0.066415	442	2
002 30ms181005 BRCA2-Halo PCNA-iRFP IR tracking	WT G10 +IR	407.4	0.572981	0.0318088	535	0
002 30ms181005 BRCA2-Halo PCNA-iRFP IR tracking	WT G10 +IR	410.1	8.2712	0.605126	547	0
002 30ms181005 BRCA2-Halo PCNA-iRFP IR tracking	WT G10 +IR	412.1	1.49157	0.375497	539	0
002 30ms181005 BRCA2-Halo PCNA-iRFP IR tracking	WT G10 +IR	415.1	0.232428	-0.0303496	540	0
002 30ms181005 BRCA2-Halo PCNA-iRFP IR tracking	WT G10 +IR	420.1	1.70862	0.503354	551	0
002 30ms181005 BRCA2-Halo PCNA-iRFP IR tracking	WT G10 +IR	421.1	0.259562	-0.000659065	566	0
002 30ms181005 BRCA2-Halo PCNA-iRFP IR tracking	WT G10 +IR	424.5	1.53605	0.419187	577	0
002 30ms181005 BRCA2-Halo PCNA-iRFP IR tracking	WT G10 +IR	428.3	0.409382	0.0837832	565	0
002 30ms181005 BRCA2-Halo PCNA-iRFP IR tracking	WT G10 +IR	429.1	3.13396	0.650615	576	0
002 30ms181005 BRCA2-Halo PCNA-iRFP IR tracking	WT G10 +IR	431.1	2.03375	0.391314	579	0
002 30ms181005 BRCA2-Halo PCNA-iRFP IR tracking	WT G10 +IR	432.1	0.0149019	0.333849	562	2
002 30ms181005 BRCA2-Halo PCNA-iRFP IR tracking	WT G10 +IR	434.1	0.00350287	0.197842	564	2
002 30ms181005 BRCA2-Halo PCNA-iRFP IR tracking	WT G10 +IR	436.6	0.0164795	0.483978	456	2
002 30ms181005 BRCA2-Halo PCNA-iRFP IR tracking	WT G10 +IR	436.8	0.00847183	0.400466	567	2
002 30ms181005 BRCA2-Halo PCNA-iRFP IR tracking	WT G10 +IR	437.2	0.102687	0.132018	505	1
002 30ms181005 BRCA2-Halo PCNA-iRFP IR tracking	WT G10 +IR	437.4	0.000292656	0.0734878	529	2
002 30ms181005 BRCA2-Halo PCNA-iRFP IR tracking	WT G10 +IR	438.1	0.651657	0.525737	559	0
002 30ms181005 BRCA2-Halo PCNA-iRFP IR tracking	WT G10 +IR	439.1	0.733164	0.515898	584	0
002 30ms181005 BRCA2-Halo PCNA-iRFP IR tracking	WT G10 +IR	440.2	4.79013e-05	0.175058	575	2
002 30ms181005 BRCA2-Halo PCNA-iRFP IR tracking	WT G10 +IR	440.3	2.39432	0.448378	588	0
002 30ms181005 BRCA2-Halo PCNA-iRFP IR tracking	WT G10 +IR	441.2	1.25529	0.285846	586	0
002 30ms181005 BRCA2-Halo PCNA-iRFP IR tracking	WT G10 +IR	444.1	0.00578399	0.185333	588	2
002 30ms181005 BRCA2-Halo PCNA-iRFP IR tracking	WT G10 +IR	447.1	0.751404	0.186694	596	0
002 30ms181005 BRCA2-Halo PCNA-iRFP IR tracking	WT G10 +IR	448.1	0.00505619	0.138701	389	2
002 30ms181005 BRCA2-Halo PCNA-iRFP IR tracking	WT G10 +IR	448.12	0.000828481	-0.0568476	640	2
002 30ms181005 BRCA2-Halo PCNA-iRFP IR tracking	WT G10 +IR	448.3	0.00300828	0.153312	415	2
002 30ms181005 BRCA2-Halo PCNA-iRFP IR tracking	WT G10 +IR	448.9	0.000314768	0.0633567	546	2
002 30ms181005 BRCA2-Halo PCNA-iRFP IR tracking	WT G10 +IR	451.1	0.437181	0.155212	595	0
002 30ms181005 BRCA2-Halo PCNA-iRFP IR tracking	WT G10 +IR	451.2	0.00164478	0.126316	628	2
002 30ms181005 BRCA2-Halo PCNA-iRFP IR tracking	WT G10 +IR	455.1	0.00428003	0.309838	593	2
002 30ms181005 BRCA2-Halo PCNA-iRFP IR tracking	WT G10 +IR	455.2	1.1627	0.22969	607	0
002 30ms181005 BRCA2-Halo PCNA-iRFP IR tracking	WT G10 +IR	457.5	0.00108877	0.0605578	623	2
002 30ms181005 BRCA2-Halo PCNA-iRFP IR tracking	WT G10 +IR	457.7	0.00184735	0.0182692	646	2
002 30ms181005 BRCA2-Halo PCNA-iRFP IR tracking	WT G10 +IR	460.2	0.378679	0.364363	622	0
002 30ms181005 BRCA2-Halo PCNA-iRFP IR tracking	WT G10 +IR	460.4	0.502179	0.583391	643	0
002 30ms181005 BRCA2-Halo PCNA-iRFP IR tracking	WT G10 +IR	461.2	0.00216141	0.144673	614	1
002 30ms181005 BRCA2-Halo PCNA-iRFP IR tracking	WT G10 +IR	463.1	0.00117918	0.0935824	608	2
002 30ms181005 BRCA2-Halo PCNA-iRFP IR tracking	WT G10 +IR	466.1	0.188934	0.0993622	629	0
002 30ms181005 BRCA2-Halo PCNA-iRFP IR tracking	WT G10 +IR	469.1	1.82291	0.117362	631	0
002 30ms181005 BRCA2-Halo PCNA-iRFP IR tracking	WT G10 +IR	469.3	0.551378	0.630843	643	0
002 30ms181005 BRCA2-Halo PCNA-iRFP IR tracking	WT G10 +IR	470.3	0.0173445	0.227129	631	1
002 30ms181005 BRCA2-Halo PCNA-iRFP IR tracking	WT G10 +IR	471.1	0.568538	0.0263163	643	0
002 30ms181005 BRCA2-Halo PCNA-iRFP IR tracking	WT G10 +IR	473.2	0.025217	0.339941	620	1
002 30ms181005 BRCA2-Halo PCNA-iRFP IR tracking	WT G10 +IR	473.3	0.0147154	0.436706	632	2
002 30ms181005 BRCA2-Halo PCNA-iRFP IR tracking	WT G10 +IR	474.3	0.501921	0.325794	652	0
002 30ms181005 BRCA2-Halo PCNA-iRFP IR tracking	WT G10 +IR	475.2	0.0285617	0.256886	640	1
002 30ms181005 BRCA2-Halo PCNA-iRFP IR tracking	WT G10 +IR	475.3	0.0133507	0.470607	652	2
002 30ms181005 BRCA2-Halo PCNA-iRFP IR tracking	WT G10 +IR	476.1	0.696428	0.568469	664	0
002 30ms181005 BRCA2-Halo PCNA-iRFP IR tracking	WT G10 +IR	478.4	0.0033581	0.0917128	680	2
002 30ms181005 BRCA2-Halo PCNA-iRFP IR tracking	WT G10 +IR	480.1	1.88119	0.599876	678	0
002 30ms181005 BRCA2-Halo PCNA-iRFP IR tracking	WT G10 +IR	482.13	0.0635272	-0.112287	677	1
002 30ms181005 BRCA2-Halo PCNA-iRFP IR tracking	WT G10 +IR	482.4	0.00316491	0.140999	585	2
002 30ms181005 BRCA2-Halo PCNA-iRFP IR tracking	WT G10 +IR	482.8	0.0143085	0.178921	628	1
002 30ms181005 BRCA2-Halo PCNA-iRFP IR tracking	WT G10 +IR	483.2	0.982526	0.726422	666	0
002 30ms181005 BRCA2-Halo PCNA-iRFP IR tracking	WT G10 +IR	483.6	0.699273	0.155378	687	0
002 30ms181005 BRCA2-Halo PCNA-iRFP IR tracking	WT G10 +IR	484.1	3.95445	0.649534	696	0
002 30ms181005 BRCA2-Halo PCNA-iRFP IR tracking	WT G10 +IR	486.3	0.00868744	0.21277	720	2
002 30ms181005 BRCA2-Halo PCNA-iRFP IR tracking	WT G10 +IR	486.5	0.740704	0.641212	742	0
002 30ms181005 BRCA2-Halo PCNA-iRFP IR tracking	WT G10 +IR	486.8	0.110974	0.488805	765	1
002 30ms181005 BRCA2-Halo PCNA-iRFP IR tracking	WT G10 +IR	489.1	0.303276	0.470746	720	0
002 30ms181005 BRCA2-Halo PCNA-iRFP IR tracking	WT G10 +IR	491.1	0.209869	0.43898	716	1
002 30ms181005 BRCA2-Halo PCNA-iRFP IR tracking	WT G10 +IR	495.5	0.000818025	0.0123147	753	1
002 30ms181005 BRCA2-Halo PCNA-iRFP IR tracking	WT G10 +IR	495.7	0.216973	0.522848	768	1
002 30ms181005 BRCA2-Halo PCNA-iRFP IR tracking	WT G10 +IR	498.1	0.00951392	0.458615	738	2
002 30ms181005 BRCA2-Halo PCNA-iRFP IR tracking	WT G10 +IR	498.3	0.00216604	0.118954	763	2
002 30ms181005 BRCA2-Halo PCNA-iRFP IR tracking	WT G10 +IR	498.6	0.0306725	0.374549	790	1
002 30ms181005 BRCA2-Halo PCNA-iRFP IR tracking	WT G10 +IR	500.1	0.000763316	0.0964069	617	2
002 30ms181005 BRCA2-Halo PCNA-iRFP IR tracking	WT G10 +IR	500.3	0.00152971	0.118444	742	2
002 30ms181005 BRCA2-Halo PCNA-iRFP IR tracking	WT G10 +IR	502.1	0.648824	0.682977	734	0
002 30ms181005 BRCA2-Halo PCNA-iRFP IR tracking	WT G10 +IR	502.2	0.0699679	0.463807	751	1
002 30ms181005 BRCA2-Halo PCNA-iRFP IR tracking	WT G10 +IR	503.5	0.767932	0.550328	738	0
002 30ms181005 BRCA2-Halo PCNA-iRFP IR tracking	WT G10 +IR	504.2	0.0596576	0.123456	764	1
002 30ms181005 BRCA2-Halo PCNA-iRFP IR tracking	WT G10 +IR	505.1	0.00999668	0.0885127	662	1
002 30ms181005 BRCA2-Halo PCNA-iRFP IR tracking	WT G10 +IR	505.1	0.0072106	0.250388	712	2
002 30ms181005 BRCA2-Halo PCNA-iRFP IR tracking	WT G10 +IR	505.12	0.0184246	0.514325	737	2
002 30ms181005 BRCA2-Halo PCNA-iRFP IR tracking	WT G10 +IR	505.14	0.00613878	0.183415	755	2
002 30ms181005 BRCA2-Halo PCNA-iRFP IR tracking	WT G10 +IR	506.1	0.146051	0.304115	761	2
002 30ms181005 BRCA2-Halo PCNA-iRFP IR tracking	WT G10 +IR	507.1	1.18128	0.60327	711	0
002 30ms181005 BRCA2-Halo PCNA-iRFP IR tracking	WT G10 +IR	507.2	0.00770545	0.306045	723	2
002 30ms181005 BRCA2-Halo PCNA-iRFP IR tracking	WT G10 +IR	508.1	0.10653	-0.00670139	572	2
002 30ms181005 BRCA2-Halo PCNA-iRFP IR tracking	WT G10 +IR	508.11	0.00634165	0.539318	643	2
002 30ms181005 BRCA2-Halo PCNA-iRFP IR tracking	WT G10 +IR	508.14	0.00560625	0.119561	704	2
002 30ms181005 BRCA2-Halo PCNA-iRFP IR tracking	WT G10 +IR	508.17	0.00987004	0.242208	723	2
002 30ms181005 BRCA2-Halo PCNA-iRFP IR tracking	WT G10 +IR	508.19	0.0122946	0.396792	760	2
002 30ms181005 BRCA2-Halo PCNA-iRFP IR tracking	WT G10 +IR	508.7	0.00408102	0.160554	606	2
002 30ms181005 BRCA2-Halo PCNA-iRFP IR tracking	WT G10 +IR	508.9	0.0110774	0.309118	620	2
002 30ms181005 BRCA2-Halo PCNA-iRFP IR tracking	WT G10 +IR	510.1	1.87156	0.382133	788	0
002 30ms181005 BRCA2-Halo PCNA-iRFP IR tracking	WT G10 +IR	513.3	1.00045	0.561778	726	0
002 30ms181005 BRCA2-Halo PCNA-iRFP IR tracking	WT G10 +IR	513.5	1.40344	0.481191	743	0
002 30ms181005 BRCA2-Halo PCNA-iRFP IR tracking	WT G10 +IR	513.9	1.00059	0.230831	769	0
002 30ms181005 BRCA2-Halo PCNA-iRFP IR tracking	WT G10 +IR	515.1	0.00183922	0.103566	788	2
002 30ms181005 BRCA2-Halo PCNA-iRFP IR tracking	WT G10 +IR	516.3	1.2794	0.282975	808	0
002 30ms181005 BRCA2-Halo PCNA-iRFP IR tracking	WT G10 +IR	517.2	0.00205824	0.145715	782	2
002 30ms181005 BRCA2-Halo PCNA-iRFP IR tracking	WT G10 +IR	522.1	0.00138645	0.188701	792	2
002 30ms181005 BRCA2-Halo PCNA-iRFP IR tracking	WT G10 +IR	526.2	0.245283	0.590451	809	1
002 30ms181005 BRCA2-Halo PCNA-iRFP IR tracking	WT G10 +IR	527.2	0.00205327	0.117224	839	2
002 30ms181005 BRCA2-Halo PCNA-iRFP IR tracking	WT G10 +IR	527.4	0.00258528	0.0900856	882	2
002 30ms181005 BRCA2-Halo PCNA-iRFP IR tracking	WT G10 +IR	530.1	0.0184989	0.240859	826	1
002 30ms181005 BRCA2-Halo PCNA-iRFP IR tracking	WT G10 +IR	531.1	0.00216101	0.245001	815	2
002 30ms181005 BRCA2-Halo PCNA-iRFP IR tracking	WT G10 +IR	534.1	0.00447239	0.563695	828	2
002 30ms181005 BRCA2-Halo PCNA-iRFP IR tracking	WT G10 +IR	536.1	1.0726	0.432021	847	0
002 30ms181005 BRCA2-Halo PCNA-iRFP IR tracking	WT G10 +IR	537.2	0.00563197	0.154458	853	2
002 30ms181005 BRCA2-Halo PCNA-iRFP IR tracking	WT G10 +IR	538.1	0.0132002	0.119104	848	1
002 30ms181005 BRCA2-Halo PCNA-iRFP IR tracking	WT G10 +IR	539.1	0.268145	0.0259823	851	0
002 30ms181005 BRCA2-Halo PCNA-iRFP IR tracking	WT G10 +IR	540.4	0.0500785	0.196489	830	1
002 30ms181005 BRCA2-Halo PCNA-iRFP IR tracking	WT G10 +IR	541.1	0.0876884	0.247762	851	1
002 30ms181005 BRCA2-Halo PCNA-iRFP IR tracking	WT G10 +IR	543.2	0.0228832	0.199583	858	1
002 30ms181005 BRCA2-Halo PCNA-iRFP IR tracking	WT G10 +IR	544.11	0.248059	0.0451273	786	0
002 30ms181005 BRCA2-Halo PCNA-iRFP IR tracking	WT G10 +IR	544.14	0.468198	0.0489073	810	2
002 30ms181005 BRCA2-Halo PCNA-iRFP IR tracking	WT G10 +IR	544.2	0.00363885	0.0994875	711	2
002 30ms181005 BRCA2-Halo PCNA-iRFP IR tracking	WT G10 +IR	545.1	0.00851245	-0.028567	864	2
002 30ms181005 BRCA2-Halo PCNA-iRFP IR tracking	WT G10 +IR	548.2	0.168107	0.569751	873	1
002 30ms181005 BRCA2-Halo PCNA-iRFP IR tracking	WT G10 +IR	548.6	0.185948	0.616636	896	1
002 30ms181005 BRCA2-Halo PCNA-iRFP IR tracking	WT G10 +IR	549.1	0.00264674	0.174394	873	2
002 30ms181005 BRCA2-Halo PCNA-iRFP IR tracking	WT G10 +IR	550.12	0.0124976	0.283135	909	2
002 30ms181005 BRCA2-Halo PCNA-iRFP IR tracking	WT G10 +IR	550.13	0.00343229	0.0479226	935	0
002 30ms181005 BRCA2-Halo PCNA-iRFP IR tracking	WT G10 +IR	551.4	1.04163	0.436371	859	2
002 30ms181005 BRCA2-Halo PCNA-iRFP IR tracking	WT G10 +IR	558.2	0.00139496	0.20955	906	2
002 30ms181005 BRCA2-Halo PCNA-iRFP IR tracking	WT G10 +IR	558.9	0.00476324	0.324169	979	2
002 30ms181005 BRCA2-Halo PCNA-iRFP IR tracking	WT G10 +IR	564.2	0.00289939	0.253941	899	2
002 30ms181005 BRCA2-Halo PCNA-iRFP IR tracking	WT G10 +IR	566.2	0.0072127	0.15078	970	1
002 30ms181005 BRCA2-Halo PCNA-iRFP IR tracking	WT G10 +IR	567.1	0.00173772	0.215998	957	2
002 30ms181005 BRCA2-Halo PCNA-iRFP IR tracking	WT G10 +IR	569.2	0.00212555	-0.0303326	959	2
002 30ms181005 BRCA2-Halo PCNA-iRFP IR tracking	WT G10 +IR	570.2	0.00204692	0.180304	976	2
002 30ms181005 BRCA2-Halo PCNA-iRFP IR tracking	WT G10 +IR	575.2	0.00537348	0.222083	948	2
002 30ms181005 BRCA2-Halo PCNA-iRFP IR tracking	WT G10 +IR	578.1	0.0048791	0.230713	1000	2
002 30ms181005 BRCA2-Halo PCNA-iRFP IR tracking	WT G10 +IR	581.1	0.386195	0.0926998	1006	0
002 30ms181005 BRCA2-Halo PCNA-iRFP IR tracking	WT G10 +IR	582.1	0.00334136	0.215783	1010	2
002 30ms181005 BRCA2-Halo PCNA-iRFP IR tracking	WT G10 +IR	584.8	0.0965356	0.211556	1070	1
002 30ms181005 BRCA2-Halo PCNA-iRFP IR tracking	WT G10 +IR	586.11	0.376076	0.349887	998	0
002 30ms181005 BRCA2-Halo PCNA-iRFP IR tracking	WT G10 +IR	586.12	0.875096	0.642207	1039	1
002 30ms181005 BRCA2-Halo PCNA-iRFP IR tracking	WT G10 +IR	587.3	0.401825	0.364203	1017	0
002 30ms181005 BRCA2-Halo PCNA-iRFP IR tracking	WT G10 +IR	592.1	3.21636	0.358566	1053	0
002 30ms181005 BRCA2-Halo PCNA-iRFP IR tracking	WT G10 +IR	593.1	0.00448413	0.281158	1036	2
002 30ms181005 BRCA2-Halo PCNA-iRFP IR tracking	WT G10 +IR	599.2	0.00227855	0.287009	1065	2
002 30ms181005 BRCA2-Halo PCNA-iRFP IR tracking	WT G10 +IR	600.1	0.478828	0.334854	1071	0
002 30ms181005 BRCA2-Halo PCNA-iRFP IR tracking	WT G10 +IR	600.2	0.00598359	0.116334	1082	2
002 30ms181005 BRCA2-Halo PCNA-iRFP IR tracking	WT G10 +IR	601.1	0.000344248	0.0135762	1031	2
002 30ms181005 BRCA2-Halo PCNA-iRFP IR tracking	WT G10 +IR	603.1	1.37338	0.387369	1070	0
002 30ms181005 BRCA2-Halo PCNA-iRFP IR tracking	WT G10 +IR	604.2	0.000235254	0.0544257	1064	2
002 30ms181005 BRCA2-Halo PCNA-iRFP IR tracking	WT G10 +IR	605.6	0.0233454	0.343702	1085	1
002 30ms181005 BRCA2-Halo PCNA-iRFP IR tracking	WT G10 +IR	606.2	0.138654	0.600806	1072	1
002 30ms181005 BRCA2-Halo PCNA-iRFP IR tracking	WT G10 +IR	611.2	0.00849225	0.374944	1108	2
002 30ms181005 BRCA2-Halo PCNA-iRFP IR tracking	WT G10 +IR	619.1	0.0143551	-0.172824	1129	0
002 30ms181005 BRCA2-Halo PCNA-iRFP IR tracking	WT G10 +IR	621.1	0.00149175	0.315804	1110	2
002 30ms181005 BRCA2-Halo PCNA-iRFP IR tracking	WT G10 +IR	622.1	1.48141	0.443257	1134	0
002 30ms181005 BRCA2-Halo PCNA-iRFP IR tracking	WT G10 +IR	623.12	0.0750409	0.487686	1141	2
002 30ms181005 BRCA2-Halo PCNA-iRFP IR tracking	WT G10 +IR	623.5	1.35201	0.213572	1113	0
002 30ms181005 BRCA2-Halo PCNA-iRFP IR tracking	WT G10 +IR	624.1	0.000187766	0.0618794	1101	2
002 30ms181005 BRCA2-Halo PCNA-iRFP IR tracking	WT G10 +IR	630.2	0.00152445	-0.143718	1141	2
002 30ms181005 BRCA2-Halo PCNA-iRFP IR tracking	WT G10 +IR	631.1	0.00657061	0.247206	1134	2
002 30ms181005 BRCA2-Halo PCNA-iRFP IR tracking	WT G10 +IR	631.3	0.0161235	0.496703	1176	2
002 30ms181005 BRCA2-Halo PCNA-iRFP IR tracking	WT G10 +IR	633.1	0.628921	0.343485	1180	0
002 30ms181005 BRCA2-Halo PCNA-iRFP IR tracking	WT G10 +IR	636.1	2.8577	0.500232	1194	0
002 30ms181005 BRCA2-Halo PCNA-iRFP IR tracking	WT G10 +IR	638.1	0.0101138	0.237565	1194	2
002 30ms181005 BRCA2-Halo PCNA-iRFP IR tracking	WT G10 +IR	639.1	0.0084489	0.377241	1194	2
002 30ms181005 BRCA2-Halo PCNA-iRFP IR tracking	WT G10 +IR	639.7	0.000404431	0.120508	1233	2
002 30ms181005 BRCA2-Halo PCNA-iRFP IR tracking	WT G10 +IR	639.8	0.00474586	0.0335621	1245	1
002 30ms181005 BRCA2-Halo PCNA-iRFP IR tracking	WT G10 +IR	642.2	0.124458	0.297263	1180	1
002 30ms181005 BRCA2-Halo PCNA-iRFP IR tracking	WT G10 +IR	642.4	0.11674	0.421516	1208	1
002 30ms181005 BRCA2-Halo PCNA-iRFP IR tracking	WT G10 +IR	644.2	0.294046	0.65325	1211	1
002 30ms181005 BRCA2-Halo PCNA-iRFP IR tracking	WT G10 +IR	645.1	0.00114616	0.24696	1198	2
002 30ms181005 BRCA2-Halo PCNA-iRFP IR tracking	WT G10 +IR	647.1	0.00122751	0.207456	1227	2
002 30ms181005 BRCA2-Halo PCNA-iRFP IR tracking	WT G10 +IR	648.1	0.988074	0.280865	1199	0
002 30ms181005 BRCA2-Halo PCNA-iRFP IR tracking	WT G10 +IR	648.3	0.354484	0.309683	1222	0
002 30ms181005 BRCA2-Halo PCNA-iRFP IR tracking	WT G10 +IR	648.5	1.18544	0.323245	1243	0
002 30ms181005 BRCA2-Halo PCNA-iRFP IR tracking	WT G10 +IR	649.1	0.0032469	0.249159	1217	2
002 30ms181005 BRCA2-Halo PCNA-iRFP IR tracking	WT G10 +IR	649.3	0.0079691	0.245538	1236	2
002 30ms181005 BRCA2-Halo PCNA-iRFP IR tracking	WT G10 +IR	650.2	1.40018	0.641982	1240	0
002 30ms181005 BRCA2-Halo PCNA-iRFP IR tracking	WT G10 +IR	656.1	0.00174636	0.301734	1224	2
002 30ms181005 BRCA2-Halo PCNA-iRFP IR tracking	WT G10 +IR	657.8	0.000186323	0.170752	1298	2
002 30ms181005 BRCA2-Halo PCNA-iRFP IR tracking	WT G10 +IR	658.1	1.37724	0.565555	1278	0
002 30ms181005 BRCA2-Halo PCNA-iRFP IR tracking	WT G10 +IR	660.1	1.00106	0.23539	1262	0
002 30ms181005 BRCA2-Halo PCNA-iRFP IR tracking	WT G10 +IR	667.1	0.0797522	0.332412	1268	1
002 30ms181005 BRCA2-Halo PCNA-iRFP IR tracking	WT G10 +IR	669.1	1.54133	0.296696	1317	0
002 30ms181005 BRCA2-Halo PCNA-iRFP IR tracking	WT G10 +IR	671.1	0.00177887	0.108688	1238	2
002 30ms181005 BRCA2-Halo PCNA-iRFP IR tracking	WT G10 +IR	672.7	1.33414	0.711821	1322	0
002 30ms181005 BRCA2-Halo PCNA-iRFP IR tracking	WT G10 +IR	673.1	0.0566707	0.334752	1334	1
002 30ms181005 BRCA2-Halo PCNA-iRFP IR tracking	WT G10 +IR	674.1	0.00177596	0.267941	1271	2
002 30ms181005 BRCA2-Halo PCNA-iRFP IR tracking	WT G10 +IR	676.1	1.9367	0.452119	1331	0
002 30ms181005 BRCA2-Halo PCNA-iRFP IR tracking	WT G10 +IR	678.12	0.31565	0.130783	1399	2
002 30ms181005 BRCA2-Halo PCNA-iRFP IR tracking	WT G10 +IR	678.15	0.166022	0.528395	1431	1
002 30ms181005 BRCA2-Halo PCNA-iRFP IR tracking	WT G10 +IR	678.17	0.0794814	0.44707	1492	1
002 30ms181005 BRCA2-Halo PCNA-iRFP IR tracking	WT G10 +IR	678.22	0.288955	0.0744586	1540	1
002 30ms181005 BRCA2-Halo PCNA-iRFP IR tracking	WT G10 +IR	678.25	0.000103886	0.0824268	1569	1
002 30ms181005 BRCA2-Halo PCNA-iRFP IR tracking	WT G10 +IR	679.3	0.000377386	0.028321	1382	1
002 30ms181005 BRCA2-Halo PCNA-iRFP IR tracking	WT G10 +IR	680.3	0.0732778	0.25207	1354	2
002 30ms181005 BRCA2-Halo PCNA-iRFP IR tracking	WT G10 +IR	681.1	2.05902	0.291073	1371	0
002 30ms181005 BRCA2-Halo PCNA-iRFP IR tracking	WT G10 +IR	684.1	0.313346	0.344073	1447	0
002 30ms181005 BRCA2-Halo PCNA-iRFP IR tracking	WT G10 +IR	684.3	0.122755	0.54017	1382	1
002 30ms181005 BRCA2-Halo PCNA-iRFP IR tracking	WT G10 +IR	684.4	0.919874	0.148639	1400	0
002 30ms181005 BRCA2-Halo PCNA-iRFP IR tracking	WT G10 +IR	684.8	0.10618	0.258225	1428	0
002 30ms181005 BRCA2-Halo PCNA-iRFP IR tracking	WT G10 +IR	687.1	0.00196796	0.0684163	1412	2
002 30ms181005 BRCA2-Halo PCNA-iRFP IR tracking	WT G10 +IR	687.4	0.0042955	0.219853	1458	2
002 30ms181005 BRCA2-Halo PCNA-iRFP IR tracking	WT G10 +IR	690.1	0.0020027	0.190335	1206	2
002 30ms181005 BRCA2-Halo PCNA-iRFP IR tracking	WT G10 +IR	692.1	0.00462965	0.255829	1441	2
002 30ms181005 BRCA2-Halo PCNA-iRFP IR tracking	WT G10 +IR	692.4	0.00294923	0.191391	1474	2
002 30ms181005 BRCA2-Halo PCNA-iRFP IR tracking	WT G10 +IR	693.4	0.000182802	0.0532338	1445	2
002 30ms181005 BRCA2-Halo PCNA-iRFP IR tracking	WT G10 +IR	694.1	0.00053142	0.0626879	1393	2
002 30ms181005 BRCA2-Halo PCNA-iRFP IR tracking	WT G10 +IR	703.1	0.00455546	0.418429	1482	2
002 30ms181005 BRCA2-Halo PCNA-iRFP IR tracking	WT G10 +IR	704.1	0.463848	0.366089	1489	0
002 30ms181005 BRCA2-Halo PCNA-iRFP IR tracking	WT G10 +IR	706.1	0.00234844	0.154266	1446	2
002 30ms181005 BRCA2-Halo PCNA-iRFP IR tracking	WT G10 +IR	708.7	0.00762621	0.325929	1516	2
002 30ms181005 BRCA2-Halo PCNA-iRFP IR tracking	WT G10 +IR	709.2	0.180095	0.458018	1499	1
002 30ms181005 BRCA2-Halo PCNA-iRFP IR tracking	WT G10 +IR	709.4	0.109373	0.366758	1525	1
002 30ms181005 BRCA2-Halo PCNA-iRFP IR tracking	WT G10 +IR	710.1	0.00599178	0.169046	1510	2
002 30ms181005 BRCA2-Halo PCNA-iRFP IR tracking	WT G10 +IR	713.1	0.0189173	0.406427	1508	1
002 30ms181005 BRCA2-Halo PCNA-iRFP IR tracking	WT G10 +IR	714.9	1.13386	0.572497	1500	0
002 30ms181005 BRCA2-Halo PCNA-iRFP IR tracking	WT G10 +IR	715.1	0.00137055	0.150732	1479	2
002 30ms181005 BRCA2-Halo PCNA-iRFP IR tracking	WT G10 +IR	716.3	0.114613	0.26262	1520	1
002 30ms181005 BRCA2-Halo PCNA-iRFP IR tracking	WT G10 +IR	717.1	0.00839466	0.213575	1505	2
002 30ms181005 BRCA2-Halo PCNA-iRFP IR tracking	WT G10 +IR	718.3	1.22203	0.618755	1500	0
002 30ms181005 BRCA2-Halo PCNA-iRFP IR tracking	WT G10 +IR	718.7	0.601486	0.19877	1533	0
002 30ms181005 BRCA2-Halo PCNA-iRFP IR tracking	WT G10 +IR	719.1	0.000371257	0.0949119	1542	2
002 30ms181005 BRCA2-Halo PCNA-iRFP IR tracking	WT G10 +IR	723.1	0.0106561	0.256611	1512	2
002 30ms181005 BRCA2-Halo PCNA-iRFP IR tracking	WT G10 +IR	723.13	0.0314009	0.496135	1532	2
002 30ms181005 BRCA2-Halo PCNA-iRFP IR tracking	WT G10 +IR	723.14	0.0403495	0.391191	1547	1
002 30ms181005 BRCA2-Halo PCNA-iRFP IR tracking	WT G10 +IR	723.3	0.00326326	0.0575805	1467	2
002 30ms181005 BRCA2-Halo PCNA-iRFP IR tracking	WT G10 +IR	728.1	0.00197083	0.152042	1548	2
002 30ms181005 BRCA2-Halo PCNA-iRFP IR tracking	WT G10 +IR	730.2	0.134906	0.80255	1572	1
002 30ms181005 BRCA2-Halo PCNA-iRFP IR tracking	WT G10 +IR	732.3	0.00147337	0.218359	1578	1
002 30ms181005 BRCA2-Halo PCNA-iRFP IR tracking	WT G10 +IR	734.1	0.999791	0.625504	1581	0
002 30ms181005 BRCA2-Halo PCNA-iRFP IR tracking	WT G10 +IR	734.2	0.00209964	0.205833	1512	2
002 30ms181005 BRCA2-Halo PCNA-iRFP IR tracking	WT G10 +IR	734.9	0.0245763	0.269391	1564	1
002 30ms181005 BRCA2-Halo PCNA-iRFP IR tracking	WT G10 +IR	735.1	0.0324942	0.345323	1654	1
002 30ms181005 BRCA2-Halo PCNA-iRFP IR tracking	WT G10 +IR	735.3	0.00803145	0.375623	1577	2
002 30ms181005 BRCA2-Halo PCNA-iRFP IR tracking	WT G10 +IR	735.7	0.00299793	0.156536	1599	2
002 30ms181005 BRCA2-Halo PCNA-iRFP IR tracking	WT G10 +IR	735.9	0.0195589	0.51399	1641	2
002 30ms181005 BRCA2-Halo PCNA-iRFP IR tracking	WT G10 +IR	736.2	0.245401	0.197601	1595	1
002 30ms181005 BRCA2-Halo PCNA-iRFP IR tracking	WT G10 +IR	740.1	1.5989	0.61009	1581	0
002 30ms181005 BRCA2-Halo PCNA-iRFP IR tracking	WT G10 +IR	742.1	0.000161172	-0.0171733	1581	2
002 30ms181005 BRCA2-Halo PCNA-iRFP IR tracking	WT G10 +IR	749.1	1.94375	0.40542	1650	0
002 30ms181005 BRCA2-Halo PCNA-iRFP IR tracking	WT G10 +IR	750.1	0.0221791	0.573127	1692	2
002 30ms181005 BRCA2-Halo PCNA-iRFP IR tracking	WT G10 +IR	750.6	0.013541	0.317894	1673	2
002 30ms181005 BRCA2-Halo PCNA-iRFP IR tracking	WT G10 +IR	751.1	2.07003	0.502441	1662	0
002 30ms181005 BRCA2-Halo PCNA-iRFP IR tracking	WT G10 +IR	753.1	1.22244	0.448167	1683	0
002 30ms181005 BRCA2-Halo PCNA-iRFP IR tracking	WT G10 +IR	755.7	0.176943	0.191039	1700	1
002 30ms181005 BRCA2-Halo PCNA-iRFP IR tracking	WT G10 +IR	756.1	0.00134185	0.184264	1672	2
002 30ms181005 BRCA2-Halo PCNA-iRFP IR tracking	WT G10 +IR	758.6	0.291521	0.281214	1681	0
002 30ms181005 BRCA2-Halo PCNA-iRFP IR tracking	WT G10 +IR	761.1	1.3045	0.296504	1713	0
002 30ms181005 BRCA2-Halo PCNA-iRFP IR tracking	WT G10 +IR	762.11	0.273104	0.518132	1667	0
002 30ms181005 BRCA2-Halo PCNA-iRFP IR tracking	WT G10 +IR	762.12	0.48792	0.407857	1685	1
002 30ms181005 BRCA2-Halo PCNA-iRFP IR tracking	WT G10 +IR	762.16	0.0327957	0.0425358	1715	2
002 30ms181005 BRCA2-Halo PCNA-iRFP IR tracking	WT G10 +IR	762.2	0.255746	0.685352	1615	1
002 30ms181005 BRCA2-Halo PCNA-iRFP IR tracking	WT G10 +IR	762.4	0.163219	0.414134	1629	1
002 30ms181005 BRCA2-Halo PCNA-iRFP IR tracking	WT G10 +IR	763.1	2.05482	0.258721	1725	2
002 30ms181005 BRCA2-Halo PCNA-iRFP IR tracking	WT G10 +IR	767.5	0.0015239	0.034325	1756	2
002 30ms181005 BRCA2-Halo PCNA-iRFP IR tracking	WT G10 +IR	767.7	0.00641176	0.289576	1780	2
002 30ms181005 BRCA2-Halo PCNA-iRFP IR tracking	WT G10 +IR	780.1	4.49019	0.677926	1790	0
002 30ms181005 BRCA2-Halo PCNA-iRFP IR tracking	WT G10 +IR	782.1	3.47014	0.459007	1804	0
002 30ms181005 BRCA2-Halo PCNA-iRFP IR tracking	WT G10 +IR	784.4	0.000111783	-0.061837	1846	2
002 30ms181005 BRCA2-Halo PCNA-iRFP IR tracking	WT G10 +IR	784.6	0.00529577	0.291085	1873	2
002 30ms181005 BRCA2-Halo PCNA-iRFP IR tracking	WT G10 +IR	785.2	0.0291556	0.241744	1810	1
002 30ms181005 BRCA2-Halo PCNA-iRFP IR tracking	WT G10 +IR	788.1	1.46283	0.266053	1814	0
002 30ms181005 BRCA2-Halo PCNA-iRFP IR tracking	WT G10 +IR	791.2	0.00652854	0.171226	1808	1
002 30ms181005 BRCA2-Halo PCNA-iRFP IR tracking	WT G10 +IR	791.7	0.00478423	0.199548	1842	2
002 30ms181005 BRCA2-Halo PCNA-iRFP IR tracking	WT G10 +IR	792.5	0.0761827	0.15681	1831	1
002 30ms181005 BRCA2-Halo PCNA-iRFP IR tracking	WT G10 +IR	793.3	0.462535	0.573345	1854	1
002 30ms181005 BRCA2-Halo PCNA-iRFP IR tracking	WT G10 +IR	796.2	0.68812	0.708689	1874	0
002 30ms181005 BRCA2-Halo PCNA-iRFP IR tracking	WT G10 +IR	796.5	0.128196	0.106293	1889	1
002 30ms181005 BRCA2-Halo PCNA-iRFP IR tracking	WT G10 +IR	799.1	0.548726	0.0440057	1890	0
002 30ms181005 BRCA2-Halo PCNA-iRFP IR tracking	WT G10 +IR	800.1	0.0495211	0.430601	1922	1
002 30ms181005 BRCA2-Halo PCNA-iRFP IR tracking	WT G10 +IR	800.11	0.0459485	0.0173385	1933	0
002 30ms181005 BRCA2-Halo PCNA-iRFP IR tracking	WT G10 +IR	800.5	0.0152831	0.405054	1855	2
002 30ms181005 BRCA2-Halo PCNA-iRFP IR tracking	WT G10 +IR	800.6	0.0258723	0.112972	1873	1
002 30ms181005 BRCA2-Halo PCNA-iRFP IR tracking	WT G10 +IR	800.8	0.0316015	0.0461757	1894	1
002 30ms181005 BRCA2-Halo PCNA-iRFP IR tracking	WT G10 +IR	800.9	0.00185332	-0.0174266	1908	2
002 30ms181005 BRCA2-Halo PCNA-iRFP IR tracking	WT G10 +IR	805.1	0.892074	0.688934	1898	0
002 30ms181005 BRCA2-Halo PCNA-iRFP IR tracking	WT G10 +IR	809.1	0.0321935	0.239694	1914	1
002 30ms181005 BRCA2-Halo PCNA-iRFP IR tracking	WT G10 +IR	819.12	0.171789	0.104617	1969	0
002 30ms181005 BRCA2-Halo PCNA-iRFP IR tracking	WT G10 +IR	819.13	0.212711	0.505117	1984	1
002 30ms181005 BRCA2-Halo PCNA-iRFP IR tracking	WT G10 +IR	819.2	0.00220848	0.0787264	1913	2
002 30ms181005 BRCA2-Halo PCNA-iRFP IR tracking	WT G10 +IR	819.9	0.178022	0.296354	1946	1
002 30ms181005 BRCA2-Halo PCNA-iRFP IR tracking	WT G10 +IR	821.1	0.0023745	0.271466	1888	2
002 30ms181005 BRCA2-Halo PCNA-iRFP IR tracking	WT G10 +IR	826.3	0.0710583	0.372899	1947	1
002 30ms181012 BRCA2-Halo PCNA-iRFP IR tracking	WT G10 +IR	6.14	0.00187858	0.121452	86	2
002 30ms181012 BRCA2-Halo PCNA-iRFP IR tracking	WT G10 +IR	6.5	0.00332368	0.136255	19	2
002 30ms181012 BRCA2-Halo PCNA-iRFP IR tracking	WT G10 +IR	6.9	0.002644	0.0913782	42	2
002 30ms181012 BRCA2-Halo PCNA-iRFP IR tracking	WT G10 +IR	15.1	0.00148394	0.389226	0	2
002 30ms181012 BRCA2-Halo PCNA-iRFP IR tracking	WT G10 +IR	19.1	1.4345	0.400276	9	0
002 30ms181012 BRCA2-Halo PCNA-iRFP IR tracking	WT G10 +IR	24.1	0.689374	0.454009	7	0
002 30ms181012 BRCA2-Halo PCNA-iRFP IR tracking	WT G10 +IR	27.3	1.26064	0.658493	4	0
002 30ms181012 BRCA2-Halo PCNA-iRFP IR tracking	WT G10 +IR	30.1	1.66882	0.39923	0	0
002 30ms181012 BRCA2-Halo PCNA-iRFP IR tracking	WT G10 +IR	32.1	0.000734182	0.0212771	0	2
002 30ms181012 BRCA2-Halo PCNA-iRFP IR tracking	WT G10 +IR	33.1	2.966	0.507175	10	0
002 30ms181012 BRCA2-Halo PCNA-iRFP IR tracking	WT G10 +IR	35.2	0.291649	0.577758	14	1
002 30ms181012 BRCA2-Halo PCNA-iRFP IR tracking	WT G10 +IR	38.3	0.0305803	-0.0288416	29	0
002 30ms181012 BRCA2-Halo PCNA-iRFP IR tracking	WT G10 +IR	41.3	0.0193474	0.245325	35	1
002 30ms181012 BRCA2-Halo PCNA-iRFP IR tracking	WT G10 +IR	46.1	3.53879	0.556339	18	0
002 30ms181012 BRCA2-Halo PCNA-iRFP IR tracking	WT G10 +IR	47.1	0.298416	0.250207	16	0
002 30ms181012 BRCA2-Halo PCNA-iRFP IR tracking	WT G10 +IR	48.1	5.10421	0.616771	21	0
002 30ms181012 BRCA2-Halo PCNA-iRFP IR tracking	WT G10 +IR	50.1	0.0066191	0.263715	0	2
002 30ms181012 BRCA2-Halo PCNA-iRFP IR tracking	WT G10 +IR	56.11	0.0173774	0.179848	47	0
002 30ms181012 BRCA2-Halo PCNA-iRFP IR tracking	WT G10 +IR	56.5	0.00988709	0.305436	18	2
002 30ms181012 BRCA2-Halo PCNA-iRFP IR tracking	WT G10 +IR	60.1	3.80662	0.517645	37	0
002 30ms181012 BRCA2-Halo PCNA-iRFP IR tracking	WT G10 +IR	62.1	0.00520926	0.129241	0	2
002 30ms181012 BRCA2-Halo PCNA-iRFP IR tracking	WT G10 +IR	62.2	0.00239498	-0.142781	25	1
002 30ms181012 BRCA2-Halo PCNA-iRFP IR tracking	WT G10 +IR	62.5	0.00257949	0.131745	56	2
002 30ms181012 BRCA2-Halo PCNA-iRFP IR tracking	WT G10 +IR	64.3	0.00167604	0.0336086	11	2
002 30ms181012 BRCA2-Halo PCNA-iRFP IR tracking	WT G10 +IR	64.5	0.00295849	0.0847739	31	2
002 30ms181012 BRCA2-Halo PCNA-iRFP IR tracking	WT G10 +IR	70.1	0.840123	0.219296	35	0
002 30ms181012 BRCA2-Halo PCNA-iRFP IR tracking	WT G10 +IR	71.5	0.00153749	0.0203495	22	1
002 30ms181012 BRCA2-Halo PCNA-iRFP IR tracking	WT G10 +IR	77.1	1.92463	0.29454	43	0
002 30ms181012 BRCA2-Halo PCNA-iRFP IR tracking	WT G10 +IR	85.1	7.58731	0.48413	45	0
002 30ms181012 BRCA2-Halo PCNA-iRFP IR tracking	WT G10 +IR	86.1	1.06975	0.501253	0	0
002 30ms181012 BRCA2-Halo PCNA-iRFP IR tracking	WT G10 +IR	86.11	0.287213	0.287755	41	0
002 30ms181012 BRCA2-Halo PCNA-iRFP IR tracking	WT G10 +IR	92.1	0.765139	0.46655	54	0
002 30ms181012 BRCA2-Halo PCNA-iRFP IR tracking	WT G10 +IR	95.1	0.000886863	0.015906	0	2
002 30ms181012 BRCA2-Halo PCNA-iRFP IR tracking	WT G10 +IR	98.1	1.69132	0.349981	53	0
002 30ms181012 BRCA2-Halo PCNA-iRFP IR tracking	WT G10 +IR	101.1	3.05643	0.509047	53	0
002 30ms181012 BRCA2-Halo PCNA-iRFP IR tracking	WT G10 +IR	103.1	0.0018155	0.115794	0	2
002 30ms181012 BRCA2-Halo PCNA-iRFP IR tracking	WT G10 +IR	112.2	0.00247769	3.94864e-05	49	2
002 30ms181012 BRCA2-Halo PCNA-iRFP IR tracking	WT G10 +IR	118.1	0.33648	-0.0516223	70	0
002 30ms181012 BRCA2-Halo PCNA-iRFP IR tracking	WT G10 +IR	119.1	3.70904	0.316736	73	0
002 30ms181012 BRCA2-Halo PCNA-iRFP IR tracking	WT G10 +IR	122.2	5.05298	0.497891	67	0
002 30ms181012 BRCA2-Halo PCNA-iRFP IR tracking	WT G10 +IR	127.1	2.66113	0.332594	71	0
002 30ms181012 BRCA2-Halo PCNA-iRFP IR tracking	WT G10 +IR	128.2	0.00586028	0.363659	7	2
002 30ms181012 BRCA2-Halo PCNA-iRFP IR tracking	WT G10 +IR	128.5	0.0160709	0.222395	48	1
002 30ms181012 BRCA2-Halo PCNA-iRFP IR tracking	WT G10 +IR	131.2	0.00293417	0.0392716	77	2
002 30ms181012 BRCA2-Halo PCNA-iRFP IR tracking	WT G10 +IR	134.14	0.00696269	0.0766736	71	2
002 30ms181012 BRCA2-Halo PCNA-iRFP IR tracking	WT G10 +IR	134.9	0.00954725	0.265033	26	1
002 30ms181012 BRCA2-Halo PCNA-iRFP IR tracking	WT G10 +IR	135.1	0.392688	0.121278	26	1
002 30ms181012 BRCA2-Halo PCNA-iRFP IR tracking	WT G10 +IR	135.3	0.00416983	0.126135	53	2
002 30ms181012 BRCA2-Halo PCNA-iRFP IR tracking	WT G10 +IR	135.4	0.119082	0.52902	68	1
002 30ms181012 BRCA2-Halo PCNA-iRFP IR tracking	WT G10 +IR	137.1	3.94905	0.690016	82	0
002 30ms181012 BRCA2-Halo PCNA-iRFP IR tracking	WT G10 +IR	140.1	0.000543741	-0.0229287	64	2
002 30ms181012 BRCA2-Halo PCNA-iRFP IR tracking	WT G10 +IR	141.1	7.07008	0.594862	87	0
002 30ms181012 BRCA2-Halo PCNA-iRFP IR tracking	WT G10 +IR	144.2	0.0016842	0.0742938	101	1
002 30ms181012 BRCA2-Halo PCNA-iRFP IR tracking	WT G10 +IR	145.1	0.918241	0.185595	91	0
002 30ms181012 BRCA2-Halo PCNA-iRFP IR tracking	WT G10 +IR	146.1	2.24397	0.346194	99	0
002 30ms181012 BRCA2-Halo PCNA-iRFP IR tracking	WT G10 +IR	148.2	0.00466919	0.0600325	80	2
002 30ms181012 BRCA2-Halo PCNA-iRFP IR tracking	WT G10 +IR	149.1	0.0511597	-0.0513509	96	0
002 30ms181012 BRCA2-Halo PCNA-iRFP IR tracking	WT G10 +IR	153.2	0.342683	0.592138	97	1
002 30ms181012 BRCA2-Halo PCNA-iRFP IR tracking	WT G10 +IR	156.1	1.2734	0.237167	99	0
002 30ms181012 BRCA2-Halo PCNA-iRFP IR tracking	WT G10 +IR	157.1	1.87279	0.423565	94	0
002 30ms181012 BRCA2-Halo PCNA-iRFP IR tracking	WT G10 +IR	158.1	2.13773	0.536878	74	0
002 30ms181012 BRCA2-Halo PCNA-iRFP IR tracking	WT G10 +IR	163.4	0.00347192	0.0769588	66	2
002 30ms181012 BRCA2-Halo PCNA-iRFP IR tracking	WT G10 +IR	163.7	0.000575168	-0.0364892	122	2
002 30ms181012 BRCA2-Halo PCNA-iRFP IR tracking	WT G10 +IR	163.9	1.21749	0.308438	151	0
002 30ms181012 BRCA2-Halo PCNA-iRFP IR tracking	WT G10 +IR	170.1	0.0236413	0.396006	79	1
002 30ms181012 BRCA2-Halo PCNA-iRFP IR tracking	WT G10 +IR	170.5	0.000181147	-0.0963159	101	2
002 30ms181012 BRCA2-Halo PCNA-iRFP IR tracking	WT G10 +IR	170.6	0.00663049	-0.0973729	115	1
002 30ms181012 BRCA2-Halo PCNA-iRFP IR tracking	WT G10 +IR	170.7	7.12763	0.516369	129	0
002 30ms181012 BRCA2-Halo PCNA-iRFP IR tracking	WT G10 +IR	173.2	0.00303329	0.3649	110	2
002 30ms181012 BRCA2-Halo PCNA-iRFP IR tracking	WT G10 +IR	178.1	2.99041	0.4019	125	0
002 30ms181012 BRCA2-Halo PCNA-iRFP IR tracking	WT G10 +IR	178.2	0.00317428	0.319344	143	2
002 30ms181012 BRCA2-Halo PCNA-iRFP IR tracking	WT G10 +IR	180.1	2.74285	0.609912	115	0
002 30ms181012 BRCA2-Halo PCNA-iRFP IR tracking	WT G10 +IR	186.1	6.29795	0.596675	132	0
002 30ms181012 BRCA2-Halo PCNA-iRFP IR tracking	WT G10 +IR	188.1	0.0588696	0.294567	104	1
002 30ms181012 BRCA2-Halo PCNA-iRFP IR tracking	WT G10 +IR	188.3	0.0793817	0.571712	128	1
002 30ms181012 BRCA2-Halo PCNA-iRFP IR tracking	WT G10 +IR	190.1	0.00106442	0.154391	0	2
002 30ms181012 BRCA2-Halo PCNA-iRFP IR tracking	WT G10 +IR	190.5	0.000635853	0.0965279	36	2
002 30ms181012 BRCA2-Halo PCNA-iRFP IR tracking	WT G10 +IR	190.9	0.00136395	0.147561	127	2
002 30ms181012 BRCA2-Halo PCNA-iRFP IR tracking	WT G10 +IR	191.1	1.97804	0.206635	135	0
002 30ms181012 BRCA2-Halo PCNA-iRFP IR tracking	WT G10 +IR	196.3	1.58924	0.427259	128	0
002 30ms181012 BRCA2-Halo PCNA-iRFP IR tracking	WT G10 +IR	202.1	0.0733097	0.280976	144	1
002 30ms181012 BRCA2-Halo PCNA-iRFP IR tracking	WT G10 +IR	207.1	1.98068	0.381492	149	0
002 30ms181012 BRCA2-Halo PCNA-iRFP IR tracking	WT G10 +IR	214.3	0.00292717	0.163756	166	2
002 30ms181012 BRCA2-Halo PCNA-iRFP IR tracking	WT G10 +IR	216.1	2.19207	0.419837	147	0
002 30ms181012 BRCA2-Halo PCNA-iRFP IR tracking	WT G10 +IR	217.1	1.01292	0.1332	150	0
002 30ms181012 BRCA2-Halo PCNA-iRFP IR tracking	WT G10 +IR	219.2	0.00747904	0.129105	150	1
002 30ms181012 BRCA2-Halo PCNA-iRFP IR tracking	WT G10 +IR	220.3	2.83872	0.537068	148	0
002 30ms181012 BRCA2-Halo PCNA-iRFP IR tracking	WT G10 +IR	226.1	0.418487	0.162443	154	0
002 30ms181012 BRCA2-Halo PCNA-iRFP IR tracking	WT G10 +IR	229.1	2.07576	0.356793	154	0
002 30ms181012 BRCA2-Halo PCNA-iRFP IR tracking	WT G10 +IR	230.1	2.7921	0.415913	155	0
002 30ms181012 BRCA2-Halo PCNA-iRFP IR tracking	WT G10 +IR	231.1	1.48654	0.4442	163	0
002 30ms181012 BRCA2-Halo PCNA-iRFP IR tracking	WT G10 +IR	236.1	1.30749	0.427844	144	0
002 30ms181012 BRCA2-Halo PCNA-iRFP IR tracking	WT G10 +IR	236.3	1.27193	0.4047	169	0
002 30ms181012 BRCA2-Halo PCNA-iRFP IR tracking	WT G10 +IR	237.1	7.11704e-05	0.130684	154	2
002 30ms181012 BRCA2-Halo PCNA-iRFP IR tracking	WT G10 +IR	244.1	1.26195	0.275856	158	0
002 30ms181012 BRCA2-Halo PCNA-iRFP IR tracking	WT G10 +IR	245.1	5.21546	0.581565	161	0
002 30ms181012 BRCA2-Halo PCNA-iRFP IR tracking	WT G10 +IR	246.1	2.35863	0.463309	163	0
002 30ms181012 BRCA2-Halo PCNA-iRFP IR tracking	WT G10 +IR	247.2	0.000493298	0.100706	143	2
002 30ms181012 BRCA2-Halo PCNA-iRFP IR tracking	WT G10 +IR	247.3	5.07814	0.459	168	0
002 30ms181012 BRCA2-Halo PCNA-iRFP IR tracking	WT G10 +IR	254.1	1.60356	0.193293	168	0
002 30ms181012 BRCA2-Halo PCNA-iRFP IR tracking	WT G10 +IR	255.1	0.019776	0.252545	149	1
002 30ms181012 BRCA2-Halo PCNA-iRFP IR tracking	WT G10 +IR	256.1	1.62806	0.307222	177	0
002 30ms181012 BRCA2-Halo PCNA-iRFP IR tracking	WT G10 +IR	257.1	0.000210319	0.178266	161	2
002 30ms181012 BRCA2-Halo PCNA-iRFP IR tracking	WT G10 +IR	258.1	5.22539	0.592527	176	0
002 30ms181012 BRCA2-Halo PCNA-iRFP IR tracking	WT G10 +IR	260.1	8.22212	0.73032	171	0
002 30ms181012 BRCA2-Halo PCNA-iRFP IR tracking	WT G10 +IR	266.1	4.28775	0.524041	178	0
002 30ms181012 BRCA2-Halo PCNA-iRFP IR tracking	WT G10 +IR	267.1	1.01714	0.242075	176	0
002 30ms181012 BRCA2-Halo PCNA-iRFP IR tracking	WT G10 +IR	270.1	0.534458	0.324855	174	0
002 30ms181012 BRCA2-Halo PCNA-iRFP IR tracking	WT G10 +IR	271.1	2.57332	0.459953	175	0
002 30ms181012 BRCA2-Halo PCNA-iRFP IR tracking	WT G10 +IR	279.1	5.09634	0.546305	185	0
002 30ms181012 BRCA2-Halo PCNA-iRFP IR tracking	WT G10 +IR	280.1	0.137813	-0.103635	182	0
002 30ms181012 BRCA2-Halo PCNA-iRFP IR tracking	WT G10 +IR	289.1	0.00995223	0.158999	166	2
002 30ms181012 BRCA2-Halo PCNA-iRFP IR tracking	WT G10 +IR	289.3	0.00643088	0.31104	181	2
002 30ms181012 BRCA2-Halo PCNA-iRFP IR tracking	WT G10 +IR	293.1	2.13858	0.486504	184	0
002 30ms181012 BRCA2-Halo PCNA-iRFP IR tracking	WT G10 +IR	294.1	1.75737	0.385844	175	0
002 30ms181012 BRCA2-Halo PCNA-iRFP IR tracking	WT G10 +IR	296.1	3.54037	0.624004	194	0
002 30ms181012 BRCA2-Halo PCNA-iRFP IR tracking	WT G10 +IR	302.8	0.00978638	0.255963	182	2
002 30ms181012 BRCA2-Halo PCNA-iRFP IR tracking	WT G10 +IR	304.4	0.060692	0.259414	188	1
002 30ms181012 BRCA2-Halo PCNA-iRFP IR tracking	WT G10 +IR	308.1	6.65092	0.545093	189	0
002 30ms181012 BRCA2-Halo PCNA-iRFP IR tracking	WT G10 +IR	309.1	0.496416	0.103117	194	0
002 30ms181012 BRCA2-Halo PCNA-iRFP IR tracking	WT G10 +IR	310.1	5.67663	0.670816	183	0
002 30ms181012 BRCA2-Halo PCNA-iRFP IR tracking	WT G10 +IR	314.1	2.14195	0.440928	200	0
002 30ms181012 BRCA2-Halo PCNA-iRFP IR tracking	WT G10 +IR	316.2	0.00044506	-0.0116508	143	2
002 30ms181012 BRCA2-Halo PCNA-iRFP IR tracking	WT G10 +IR	318.1	0.00908013	0.237996	159	2
002 30ms181012 BRCA2-Halo PCNA-iRFP IR tracking	WT G10 +IR	318.5	0.0142911	0.462833	188	1
002 30ms181012 BRCA2-Halo PCNA-iRFP IR tracking	WT G10 +IR	319.1	1.8188	0.471789	195	0
002 30ms181012 BRCA2-Halo PCNA-iRFP IR tracking	WT G10 +IR	321.3	1.47793	0.302703	169	0
002 30ms181012 BRCA2-Halo PCNA-iRFP IR tracking	WT G10 +IR	322.1	2.75605	0.650629	204	0
002 30ms181012 BRCA2-Halo PCNA-iRFP IR tracking	WT G10 +IR	325.1	2.58645	0.385826	204	0
002 30ms181012 BRCA2-Halo PCNA-iRFP IR tracking	WT G10 +IR	327.1	3.0121	0.408696	197	0
002 30ms181012 BRCA2-Halo PCNA-iRFP IR tracking	WT G10 +IR	328.11	2.52535	0.490257	237	0
002 30ms181012 BRCA2-Halo PCNA-iRFP IR tracking	WT G10 +IR	328.3	1.88048	0.307515	159	0
002 30ms181012 BRCA2-Halo PCNA-iRFP IR tracking	WT G10 +IR	328.5	0.190124	0.19512	177	0
002 30ms181012 BRCA2-Halo PCNA-iRFP IR tracking	WT G10 +IR	328.7	1.14756	0.167627	194	0
002 30ms181012 BRCA2-Halo PCNA-iRFP IR tracking	WT G10 +IR	329.1	0.00188849	0.143524	192	1
002 30ms181012 BRCA2-Halo PCNA-iRFP IR tracking	WT G10 +IR	330.2	0.00776719	0.420089	168	2
002 30ms181012 BRCA2-Halo PCNA-iRFP IR tracking	WT G10 +IR	333.6	4.19775	0.522837	204	0
002 30ms181012 BRCA2-Halo PCNA-iRFP IR tracking	WT G10 +IR	336.1	0.00527932	-0.0899043	195	1
002 30ms181012 BRCA2-Halo PCNA-iRFP IR tracking	WT G10 +IR	341.1	5.07762	0.743557	202	0
002 30ms181012 BRCA2-Halo PCNA-iRFP IR tracking	WT G10 +IR	342.11	0.885085	0.167806	136	0
002 30ms181012 BRCA2-Halo PCNA-iRFP IR tracking	WT G10 +IR	342.14	0.162736	0.190301	159	2
002 30ms181012 BRCA2-Halo PCNA-iRFP IR tracking	WT G10 +IR	355.1	2.01864	0.39075	208	0
002 30ms181012 BRCA2-Halo PCNA-iRFP IR tracking	WT G10 +IR	357.1	0.968855	0.226363	213	0
002 30ms181012 BRCA2-Halo PCNA-iRFP IR tracking	WT G10 +IR	359.1	4.06338	0.469666	222	0
002 30ms181012 BRCA2-Halo PCNA-iRFP IR tracking	WT G10 +IR	361.1	3.13558	0.499947	223	0
002 30ms181012 BRCA2-Halo PCNA-iRFP IR tracking	WT G10 +IR	366.1	0.147805	0.0663693	227	0
002 30ms181012 BRCA2-Halo PCNA-iRFP IR tracking	WT G10 +IR	368.1	0.51702	0.302197	224	0
002 30ms181012 BRCA2-Halo PCNA-iRFP IR tracking	WT G10 +IR	372.1	4.60919	0.40332	209	0
002 30ms181012 BRCA2-Halo PCNA-iRFP IR tracking	WT G10 +IR	375.1	2.04595	0.578984	217	0
002 30ms181012 BRCA2-Halo PCNA-iRFP IR tracking	WT G10 +IR	376.1	2.24977	0.417187	230	0
002 30ms181012 BRCA2-Halo PCNA-iRFP IR tracking	WT G10 +IR	378.2	0.35901	0.529239	224	1
002 30ms181012 BRCA2-Halo PCNA-iRFP IR tracking	WT G10 +IR	380.1	0.230837	0.00173941	229	0
002 30ms181012 BRCA2-Halo PCNA-iRFP IR tracking	WT G10 +IR	384.1	4.36621	0.480897	233	0
002 30ms181012 BRCA2-Halo PCNA-iRFP IR tracking	WT G10 +IR	396.1	0.00287196	0.181615	143	2
002 30ms181012 BRCA2-Halo PCNA-iRFP IR tracking	WT G10 +IR	398.1	2.12417	0.305777	239	0
002 30ms181012 BRCA2-Halo PCNA-iRFP IR tracking	WT G10 +IR	401.11	0.0120807	0.322651	200	2
002 30ms181012 BRCA2-Halo PCNA-iRFP IR tracking	WT G10 +IR	401.5	0.0250255	0.17654	158	1
002 30ms181012 BRCA2-Halo PCNA-iRFP IR tracking	WT G10 +IR	406.5	2.4468	0.435863	251	0
002 30ms181012 BRCA2-Halo PCNA-iRFP IR tracking	WT G10 +IR	409.1	7.26376	0.616117	244	0
002 30ms181012 BRCA2-Halo PCNA-iRFP IR tracking	WT G10 +IR	417.2	0.00842818	0.287116	182	2
002 30ms181012 BRCA2-Halo PCNA-iRFP IR tracking	WT G10 +IR	417.3	3.73747	0.457273	244	0
002 30ms181012 BRCA2-Halo PCNA-iRFP IR tracking	WT G10 +IR	419.1	1.39384	0.200225	249	0
002 30ms181012 BRCA2-Halo PCNA-iRFP IR tracking	WT G10 +IR	420.1	7.06164	0.623263	250	0
002 30ms181012 BRCA2-Halo PCNA-iRFP IR tracking	WT G10 +IR	421.1	2.265	0.403504	226	0
002 30ms181012 BRCA2-Halo PCNA-iRFP IR tracking	WT G10 +IR	426.2	0.00220965	0.182627	211	2
002 30ms181012 BRCA2-Halo PCNA-iRFP IR tracking	WT G10 +IR	426.4	1.62854	0.248082	235	0
002 30ms181012 BRCA2-Halo PCNA-iRFP IR tracking	WT G10 +IR	426.8	3.25446	0.543288	254	0
002 30ms181012 BRCA2-Halo PCNA-iRFP IR tracking	WT G10 +IR	427.1	0.000336821	0.0907884	236	2
002 30ms181012 BRCA2-Halo PCNA-iRFP IR tracking	WT G10 +IR	428.1	1.97423	0.350424	246	0
002 30ms181012 BRCA2-Halo PCNA-iRFP IR tracking	WT G10 +IR	432.1	0.979363	0.413776	254	0
002 30ms181012 BRCA2-Halo PCNA-iRFP IR tracking	WT G10 +IR	433.1	2.62316	0.437576	255	0
002 30ms181012 BRCA2-Halo PCNA-iRFP IR tracking	WT G10 +IR	436.1	6.75866	0.581244	262	0
002 30ms181012 BRCA2-Halo PCNA-iRFP IR tracking	WT G10 +IR	438.1	0.485248	0.0658619	259	0
002 30ms181012 BRCA2-Halo PCNA-iRFP IR tracking	WT G10 +IR	443.8	0.0025487	0.210143	233	2
002 30ms181012 BRCA2-Halo PCNA-iRFP IR tracking	WT G10 +IR	444.1	3.22086	0.589583	259	0
002 30ms181012 BRCA2-Halo PCNA-iRFP IR tracking	WT G10 +IR	447.1	0.771652	0.180206	241	0
002 30ms181012 BRCA2-Halo PCNA-iRFP IR tracking	WT G10 +IR	448.5	0.870998	0.294483	248	0
002 30ms181012 BRCA2-Halo PCNA-iRFP IR tracking	WT G10 +IR	450.1	5.77719	0.583549	266	0
002 30ms181012 BRCA2-Halo PCNA-iRFP IR tracking	WT G10 +IR	450.2	0.00255804	0.136289	284	2
002 30ms181012 BRCA2-Halo PCNA-iRFP IR tracking	WT G10 +IR	450.4	1.90611	0.461901	297	0
002 30ms181012 BRCA2-Halo PCNA-iRFP IR tracking	WT G10 +IR	452.1	0.623611	-0.00516272	266	0
002 30ms181012 BRCA2-Halo PCNA-iRFP IR tracking	WT G10 +IR	453.1	2.29398	0.372616	252	0
002 30ms181012 BRCA2-Halo PCNA-iRFP IR tracking	WT G10 +IR	454.1	1.61954	0.44817	268	0
002 30ms181012 BRCA2-Halo PCNA-iRFP IR tracking	WT G10 +IR	457.5	3.07648	0.379776	268	0
002 30ms181012 BRCA2-Halo PCNA-iRFP IR tracking	WT G10 +IR	458.1	0.961787	0.203858	199	0
002 30ms181012 BRCA2-Halo PCNA-iRFP IR tracking	WT G10 +IR	458.5	0.772219	0.277144	233	0
002 30ms181012 BRCA2-Halo PCNA-iRFP IR tracking	WT G10 +IR	458.7	0.800258	0.37955	257	0
002 30ms181012 BRCA2-Halo PCNA-iRFP IR tracking	WT G10 +IR	459.1	1.18017	0.245107	274	0
002 30ms181012 BRCA2-Halo PCNA-iRFP IR tracking	WT G10 +IR	461.2	0.0051712	0.15926	226	2
002 30ms181012 BRCA2-Halo PCNA-iRFP IR tracking	WT G10 +IR	461.3	0.000458149	-0.0116186	243	1
002 30ms181012 BRCA2-Halo PCNA-iRFP IR tracking	WT G10 +IR	465.12	0.00664654	-0.0327791	328	2
002 30ms181012 BRCA2-Halo PCNA-iRFP IR tracking	WT G10 +IR	465.7	0.00450107	0.171048	287	2
002 30ms181012 BRCA2-Halo PCNA-iRFP IR tracking	WT G10 +IR	467.1	0.0123388	0.276422	255	2
002 30ms181012 BRCA2-Halo PCNA-iRFP IR tracking	WT G10 +IR	476.6	0.00161357	0.209379	290	1
002 30ms181012 BRCA2-Halo PCNA-iRFP IR tracking	WT G10 +IR	483.1	2.00841	0.283635	282	0
002 30ms181012 BRCA2-Halo PCNA-iRFP IR tracking	WT G10 +IR	488.1	2.46608	0.419567	279	0
002 30ms181012 BRCA2-Halo PCNA-iRFP IR tracking	WT G10 +IR	490.1	3.97036	0.596257	277	0
002 30ms181012 BRCA2-Halo PCNA-iRFP IR tracking	WT G10 +IR	504.1	1.58527	0.301283	293	0
002 30ms181012 BRCA2-Halo PCNA-iRFP IR tracking	WT G10 +IR	505.1	1.86192	0.252314	290	0
002 30ms181012 BRCA2-Halo PCNA-iRFP IR tracking	WT G10 +IR	506.1	2.40456	0.521874	286	0
002 30ms181012 BRCA2-Halo PCNA-iRFP IR tracking	WT G10 +IR	509.5	0.241944	0.181487	291	0
002 30ms181012 BRCA2-Halo PCNA-iRFP IR tracking	WT G10 +IR	512.1	1.48451	0.371402	287	0
002 30ms181012 BRCA2-Halo PCNA-iRFP IR tracking	WT G10 +IR	514.1	4.39958	0.589509	299	0
002 30ms181012 BRCA2-Halo PCNA-iRFP IR tracking	WT G10 +IR	517.1	0.00572333	0.394743	210	2
002 30ms181012 BRCA2-Halo PCNA-iRFP IR tracking	WT G10 +IR	517.3	0.00162097	0.117625	238	2
002 30ms181012 BRCA2-Halo PCNA-iRFP IR tracking	WT G10 +IR	518.1	3.9969	0.417288	291	0
002 30ms181012 BRCA2-Halo PCNA-iRFP IR tracking	WT G10 +IR	522.3	0.671548	-0.0558386	297	0
002 30ms181012 BRCA2-Halo PCNA-iRFP IR tracking	WT G10 +IR	523.2	0.00296791	0.149244	243	1
002 30ms181012 BRCA2-Halo PCNA-iRFP IR tracking	WT G10 +IR	523.5	2.00385	0.304797	275	0
002 30ms181012 BRCA2-Halo PCNA-iRFP IR tracking	WT G10 +IR	525.1	1.50158	0.339041	304	0
002 30ms181012 BRCA2-Halo PCNA-iRFP IR tracking	WT G10 +IR	526.1	1.02902	0.397931	296	0
002 30ms181012 BRCA2-Halo PCNA-iRFP IR tracking	WT G10 +IR	529.1	0.951432	0.372454	299	0
002 30ms181012 BRCA2-Halo PCNA-iRFP IR tracking	WT G10 +IR	535.1	1.84571	0.417497	305	0
002 30ms181012 BRCA2-Halo PCNA-iRFP IR tracking	WT G10 +IR	539.1	0.824948	0.194894	305	0
002 30ms181012 BRCA2-Halo PCNA-iRFP IR tracking	WT G10 +IR	540.1	4.67337	0.37417	306	0
002 30ms181012 BRCA2-Halo PCNA-iRFP IR tracking	WT G10 +IR	543.1	3.79136	0.365178	312	0
002 30ms181012 BRCA2-Halo PCNA-iRFP IR tracking	WT G10 +IR	546.2	0.00541894	0.198985	308	2
002 30ms181012 BRCA2-Halo PCNA-iRFP IR tracking	WT G10 +IR	547.1	1.82023	0.363562	304	0
002 30ms181012 BRCA2-Halo PCNA-iRFP IR tracking	WT G10 +IR	550.3	0.00284903	0.21906	323	2
002 30ms181012 BRCA2-Halo PCNA-iRFP IR tracking	WT G10 +IR	554.1	0.131774	0.0261768	299	0
002 30ms181012 BRCA2-Halo PCNA-iRFP IR tracking	WT G10 +IR	559.1	4.89853	0.57507	313	0
002 30ms181012 BRCA2-Halo PCNA-iRFP IR tracking	WT G10 +IR	561.1	3.75067	0.429495	317	0
002 30ms181012 BRCA2-Halo PCNA-iRFP IR tracking	WT G10 +IR	562.1	4.08211	0.504458	322	0
002 30ms181012 BRCA2-Halo PCNA-iRFP IR tracking	WT G10 +IR	563.1	6.62597	0.680768	319	0
002 30ms181012 BRCA2-Halo PCNA-iRFP IR tracking	WT G10 +IR	564.4	0.00183819	0.059427	206	2
002 30ms181012 BRCA2-Halo PCNA-iRFP IR tracking	WT G10 +IR	567.1	0.00242764	0.111374	297	2
002 30ms181012 BRCA2-Halo PCNA-iRFP IR tracking	WT G10 +IR	568.5	0.00350336	0.117556	307	2
002 30ms181012 BRCA2-Halo PCNA-iRFP IR tracking	WT G10 +IR	570.1	1.38085	0.36036	321	0
002 30ms181012 BRCA2-Halo PCNA-iRFP IR tracking	WT G10 +IR	577.5	0.00243873	0.174804	264	2
002 30ms181012 BRCA2-Halo PCNA-iRFP IR tracking	WT G10 +IR	577.7	1.35306	0.373018	313	0
002 30ms181012 BRCA2-Halo PCNA-iRFP IR tracking	WT G10 +IR	580.1	1.81263	0.324809	314	0
002 30ms181012 BRCA2-Halo PCNA-iRFP IR tracking	WT G10 +IR	580.3	4.05542	0.405486	333	0
002 30ms181012 BRCA2-Halo PCNA-iRFP IR tracking	WT G10 +IR	581.1	3.17393	0.351498	330	0
002 30ms181012 BRCA2-Halo PCNA-iRFP IR tracking	WT G10 +IR	583.3	0.462652	0.105049	326	0
002 30ms181012 BRCA2-Halo PCNA-iRFP IR tracking	WT G10 +IR	585.1	2.28431	0.537829	329	0
002 30ms181012 BRCA2-Halo PCNA-iRFP IR tracking	WT G10 +IR	589.3	4.66413	0.618508	331	0
002 30ms181012 BRCA2-Halo PCNA-iRFP IR tracking	WT G10 +IR	590.11	1.5507	0.516437	269	0
002 30ms181012 BRCA2-Halo PCNA-iRFP IR tracking	WT G10 +IR	590.13	1.45572	0.6065	346	0
002 30ms181012 BRCA2-Halo PCNA-iRFP IR tracking	WT G10 +IR	600.1	2.69625	0.569484	345	0
002 30ms181012 BRCA2-Halo PCNA-iRFP IR tracking	WT G10 +IR	606.1	2.49264	0.471883	332	0
002 30ms181012 BRCA2-Halo PCNA-iRFP IR tracking	WT G10 +IR	611.1	2.4489	0.52611	341	0
002 30ms181012 BRCA2-Halo PCNA-iRFP IR tracking	WT G10 +IR	612.3	2.34968	0.463402	341	0
002 30ms181012 BRCA2-Halo PCNA-iRFP IR tracking	WT G10 +IR	614.1	7.91237	0.653417	344	0
002 30ms181012 BRCA2-Halo PCNA-iRFP IR tracking	WT G10 +IR	615.1	2.54124	0.493679	341	0
002 30ms181012 BRCA2-Halo PCNA-iRFP IR tracking	WT G10 +IR	621.1	2.19616	0.378014	385	0
002 30ms181012 BRCA2-Halo PCNA-iRFP IR tracking	WT G10 +IR	624.9	1.73973	0.279321	353	0
002 30ms181012 BRCA2-Halo PCNA-iRFP IR tracking	WT G10 +IR	628.1	0.73953	0.316752	353	0
002 30ms181012 BRCA2-Halo PCNA-iRFP IR tracking	WT G10 +IR	631.1	6.96312	0.592246	361	0
002 30ms181012 BRCA2-Halo PCNA-iRFP IR tracking	WT G10 +IR	631.4	0.619283	0.135938	387	0
002 30ms181012 BRCA2-Halo PCNA-iRFP IR tracking	WT G10 +IR	631.6	0.507828	0.184209	407	0
002 30ms181012 BRCA2-Halo PCNA-iRFP IR tracking	WT G10 +IR	634.2	0.0453581	0.370585	356	1
002 30ms181012 BRCA2-Halo PCNA-iRFP IR tracking	WT G10 +IR	636.1	2.1373	0.393709	352	0
002 30ms181012 BRCA2-Halo PCNA-iRFP IR tracking	WT G10 +IR	639.12	0.0605227	-0.0319742	368	1
002 30ms181012 BRCA2-Halo PCNA-iRFP IR tracking	WT G10 +IR	639.6	0.0123815	0.143727	315	1
002 30ms181012 BRCA2-Halo PCNA-iRFP IR tracking	WT G10 +IR	639.9	0.000831111	0.150231	340	2
002 30ms181012 BRCA2-Halo PCNA-iRFP IR tracking	WT G10 +IR	645.1	0.00338473	0.0775355	444	2
002 30ms181012 BRCA2-Halo PCNA-iRFP IR tracking	WT G10 +IR	645.13	0.758561	0.645129	510	2
002 30ms181012 BRCA2-Halo PCNA-iRFP IR tracking	WT G10 +IR	645.2	0.00346257	0.234223	312	2
002 30ms181012 BRCA2-Halo PCNA-iRFP IR tracking	WT G10 +IR	645.5	0.00341335	0.17034	409	2
002 30ms181012 BRCA2-Halo PCNA-iRFP IR tracking	WT G10 +IR	649.1	6.21724	0.574591	369	0
002 30ms181012 BRCA2-Halo PCNA-iRFP IR tracking	WT G10 +IR	650.1	1.55836	0.332805	353	0
002 30ms181012 BRCA2-Halo PCNA-iRFP IR tracking	WT G10 +IR	655.1	2.42181	0.340351	371	0
002 30ms181012 BRCA2-Halo PCNA-iRFP IR tracking	WT G10 +IR	657.1	0.613601	0.208742	372	0
002 30ms181012 BRCA2-Halo PCNA-iRFP IR tracking	WT G10 +IR	659.2	0.00136924	0.0912275	270	2
002 30ms181012 BRCA2-Halo PCNA-iRFP IR tracking	WT G10 +IR	659.4	0.000603092	-0.0583845	343	2
002 30ms181012 BRCA2-Halo PCNA-iRFP IR tracking	WT G10 +IR	665.1	4.26441	0.41414	376	0
002 30ms181012 BRCA2-Halo PCNA-iRFP IR tracking	WT G10 +IR	666.1	1.06532	0.181451	376	0
002 30ms181012 BRCA2-Halo PCNA-iRFP IR tracking	WT G10 +IR	670.5	1.39835	0.233002	376	0
002 30ms181012 BRCA2-Halo PCNA-iRFP IR tracking	WT G10 +IR	672.1	1.21863	0.614022	377	0
002 30ms181012 BRCA2-Halo PCNA-iRFP IR tracking	WT G10 +IR	673.14	1.07367	0.427186	415	0
002 30ms181012 BRCA2-Halo PCNA-iRFP IR tracking	WT G10 +IR	675.1	5.89699	0.497051	384	0
002 30ms181012 BRCA2-Halo PCNA-iRFP IR tracking	WT G10 +IR	678.1	2.79386	0.436535	381	0
002 30ms181012 BRCA2-Halo PCNA-iRFP IR tracking	WT G10 +IR	681.1	0.957081	0.45595	381	0
002 30ms181012 BRCA2-Halo PCNA-iRFP IR tracking	WT G10 +IR	681.2	0.00140849	0.149734	405	2
002 30ms181012 BRCA2-Halo PCNA-iRFP IR tracking	WT G10 +IR	683.1	2.61994	0.420821	386	0
002 30ms181012 BRCA2-Halo PCNA-iRFP IR tracking	WT G10 +IR	685.4	0.0358727	0.284915	385	1
002 30ms181012 BRCA2-Halo PCNA-iRFP IR tracking	WT G10 +IR	685.6	0.00358242	0.279052	401	2
002 30ms181012 BRCA2-Halo PCNA-iRFP IR tracking	WT G10 +IR	686.1	1.75143	0.411364	389	0
002 30ms181012 BRCA2-Halo PCNA-iRFP IR tracking	WT G10 +IR	687.1	2.74554	0.394781	395	0
002 30ms181012 BRCA2-Halo PCNA-iRFP IR tracking	WT G10 +IR	689.2	0.000775186	0.120585	310	2
002 30ms181012 BRCA2-Halo PCNA-iRFP IR tracking	WT G10 +IR	691.1	2.23784	0.401022	380	0
002 30ms181012 BRCA2-Halo PCNA-iRFP IR tracking	WT G10 +IR	692.1	2.09537	0.406507	377	0
002 30ms181012 BRCA2-Halo PCNA-iRFP IR tracking	WT G10 +IR	703.5	0.00124748	0.0251885	383	2
002 30ms181012 BRCA2-Halo PCNA-iRFP IR tracking	WT G10 +IR	709.2	0.177725	0.454549	400	1
002 30ms181012 BRCA2-Halo PCNA-iRFP IR tracking	WT G10 +IR	714.2	0.00912921	0.18918	407	1
002 30ms181012 BRCA2-Halo PCNA-iRFP IR tracking	WT G10 +IR	716.1	0.560068	0.453539	408	0
002 30ms181012 BRCA2-Halo PCNA-iRFP IR tracking	WT G10 +IR	717.1	2.75183	0.399651	411	0
002 30ms181012 BRCA2-Halo PCNA-iRFP IR tracking	WT G10 +IR	718.1	0.794143	0.148546	411	0
002 30ms181012 BRCA2-Halo PCNA-iRFP IR tracking	WT G10 +IR	719.1	1.89106	0.395089	414	0
002 30ms181012 BRCA2-Halo PCNA-iRFP IR tracking	WT G10 +IR	721.11	2.4202	0.409084	404	0
002 30ms181012 BRCA2-Halo PCNA-iRFP IR tracking	WT G10 +IR	722.3	1.08721	0.329914	416	0
002 30ms181012 BRCA2-Halo PCNA-iRFP IR tracking	WT G10 +IR	726.1	0.848597	0.227005	407	0
002 30ms181012 BRCA2-Halo PCNA-iRFP IR tracking	WT G10 +IR	732.3	0.000937644	0.0457533	412	2
002 30ms181012 BRCA2-Halo PCNA-iRFP IR tracking	WT G10 +IR	735.1	2.93489	0.478336	423	0
002 30ms181012 BRCA2-Halo PCNA-iRFP IR tracking	WT G10 +IR	737.1	2.44165	0.439508	395	0
002 30ms181012 BRCA2-Halo PCNA-iRFP IR tracking	WT G10 +IR	737.2	0.000502445	0.194187	416	2
002 30ms181012 BRCA2-Halo PCNA-iRFP IR tracking	WT G10 +IR	738.1	1.65647	0.238653	433	0
002 30ms181012 BRCA2-Halo PCNA-iRFP IR tracking	WT G10 +IR	739.1	1.50627	0.244593	421	0
002 30ms181012 BRCA2-Halo PCNA-iRFP IR tracking	WT G10 +IR	740.1	1.88696	0.358857	426	0
002 30ms181012 BRCA2-Halo PCNA-iRFP IR tracking	WT G10 +IR	742.1	1.84785	0.442893	436	0
002 30ms181012 BRCA2-Halo PCNA-iRFP IR tracking	WT G10 +IR	746.1	2.30087	0.351693	443	0
002 30ms181012 BRCA2-Halo PCNA-iRFP IR tracking	WT G10 +IR	747.1	2.79938	0.427373	441	0
002 30ms181012 BRCA2-Halo PCNA-iRFP IR tracking	WT G10 +IR	750.1	3.16281	0.486358	435	0
002 30ms181012 BRCA2-Halo PCNA-iRFP IR tracking	WT G10 +IR	758.1	0.000884265	0.123368	429	2
002 30ms181012 BRCA2-Halo PCNA-iRFP IR tracking	WT G10 +IR	760.2	0.0076346	0.0879804	411	1
002 30ms181012 BRCA2-Halo PCNA-iRFP IR tracking	WT G10 +IR	760.7	0.0236782	0.254365	432	1
002 30ms181012 BRCA2-Halo PCNA-iRFP IR tracking	WT G10 +IR	767.3	0.059713	0.602379	453	1
002 30ms181012 BRCA2-Halo PCNA-iRFP IR tracking	WT G10 +IR	769.1	1.19331	0.248847	462	0
002 30ms181012 BRCA2-Halo PCNA-iRFP IR tracking	WT G10 +IR	770.2	0.85651	0.164885	461	0
002 30ms181012 BRCA2-Halo PCNA-iRFP IR tracking	WT G10 +IR	773.3	0.00227418	0.303572	430	2
002 30ms181012 BRCA2-Halo PCNA-iRFP IR tracking	WT G10 +IR	775.1	8.29591	0.588782	464	0
002 30ms181012 BRCA2-Halo PCNA-iRFP IR tracking	WT G10 +IR	783.1	4.97383	0.591196	472	0
002 30ms181012 BRCA2-Halo PCNA-iRFP IR tracking	WT G10 +IR	785.1	1.13591	0.247081	472	0
002 30ms181012 BRCA2-Halo PCNA-iRFP IR tracking	WT G10 +IR	788.1	3.62758	0.492231	482	0
002 30ms181012 BRCA2-Halo PCNA-iRFP IR tracking	WT G10 +IR	800.11	0.010001	0.172062	487	1
002 30ms181012 BRCA2-Halo PCNA-iRFP IR tracking	WT G10 +IR	800.7	0.00156998	0.177324	464	2
002 30ms181012 BRCA2-Halo PCNA-iRFP IR tracking	WT G10 +IR	801.2	0.175441	0.385126	483	1
002 30ms181012 BRCA2-Halo PCNA-iRFP IR tracking	WT G10 +IR	804.1	0.254849	0.139103	482	0
002 30ms181012 BRCA2-Halo PCNA-iRFP IR tracking	WT G10 +IR	813.1	2.22703	0.468928	499	0
002 30ms181012 BRCA2-Halo PCNA-iRFP IR tracking	WT G10 +IR	814.1	2.28646	0.445544	498	0
002 30ms181012 BRCA2-Halo PCNA-iRFP IR tracking	WT G10 +IR	815.1	3.86967	0.569784	486	0
002 30ms181012 BRCA2-Halo PCNA-iRFP IR tracking	WT G10 +IR	820.4	0.0372397	0.109365	515	1
002 30ms181012 BRCA2-Halo PCNA-iRFP IR tracking	WT G10 +IR	821.2	0.00483664	0.268173	458	2
002 30ms181012 BRCA2-Halo PCNA-iRFP IR tracking	WT G10 +IR	823.1	2.52203	0.25313	502	0
002 30ms181012 BRCA2-Halo PCNA-iRFP IR tracking	WT G10 +IR	827.1	5.99872	0.577054	506	0
002 30ms181012 BRCA2-Halo PCNA-iRFP IR tracking	WT G10 +IR	841.1	1.8349	0.306617	525	0
002 30ms181012 BRCA2-Halo PCNA-iRFP IR tracking	WT G10 +IR	852.1	0.00130704	0.099505	471	2
002 30ms181012 BRCA2-Halo PCNA-iRFP IR tracking	WT G10 +IR	855.1	0.00112289	0.104282	533	2
002 30ms181012 BRCA2-Halo PCNA-iRFP IR tracking	WT G10 +IR	857.1	0.00178403	0.152296	466	2
002 30ms181012 BRCA2-Halo PCNA-iRFP IR tracking	WT G10 +IR	858.1	0.00315413	0.254676	517	2
002 30ms181012 BRCA2-Halo PCNA-iRFP IR tracking	WT G10 +IR	860.1	1.98638	0.452673	541	0
002 30ms181012 BRCA2-Halo PCNA-iRFP IR tracking	WT G10 +IR	863.2	4.31667	0.440355	537	0
002 30ms181012 BRCA2-Halo PCNA-iRFP IR tracking	WT G10 +IR	864.1	2.37008	0.58117	541	0
002 30ms181012 BRCA2-Halo PCNA-iRFP IR tracking	WT G10 +IR	875.6	0.00491161	0.325107	510	2
002 30ms181012 BRCA2-Halo PCNA-iRFP IR tracking	WT G10 +IR	878.3	0.0163425	0.621802	575	2
002 30ms181012 BRCA2-Halo PCNA-iRFP IR tracking	WT G10 +IR	878.4	0.0870363	0.424468	587	1
002 30ms181012 BRCA2-Halo PCNA-iRFP IR tracking	WT G10 +IR	887.3	0.0310143	0.291729	583	1
002 30ms181012 BRCA2-Halo PCNA-iRFP IR tracking	WT G10 +IR	892.1	0.00214999	0.0387861	546	2
002 30ms181012 BRCA2-Halo PCNA-iRFP IR tracking	WT G10 +IR	895.5	0.00624479	0.224759	564	2
002 30ms181012 BRCA2-Halo PCNA-iRFP IR tracking	WT G10 +IR	897.1	1.35706	0.284387	559	0
002 30ms181012 BRCA2-Halo PCNA-iRFP IR tracking	WT G10 +IR	898.1	4.49311	0.61737	573	0
002 30ms181012 BRCA2-Halo PCNA-iRFP IR tracking	WT G10 +IR	899.1	5.26739	0.584587	515	0
002 30ms181012 BRCA2-Halo PCNA-iRFP IR tracking	WT G10 +IR	899.3	2.71054	0.320381	533	0
002 30ms181012 BRCA2-Halo PCNA-iRFP IR tracking	WT G10 +IR	899.9	1.49508	0.294067	567	0
002 30ms181012 BRCA2-Halo PCNA-iRFP IR tracking	WT G10 +IR	901.1	1.13613	0.420246	555	0
002 30ms181012 BRCA2-Halo PCNA-iRFP IR tracking	WT G10 +IR	901.5	3.60052	0.579586	572	0
002 30ms181012 BRCA2-Halo PCNA-iRFP IR tracking	WT G10 +IR	908.2	0.00522282	0.2056	575	1
002 30ms181012 BRCA2-Halo PCNA-iRFP IR tracking	WT G10 +IR	919.1	1.55781	0.534059	599	0
002 30ms181012 BRCA2-Halo PCNA-iRFP IR tracking	WT G10 +IR	926.2	0.0128109	0.295477	611	1
002 30ms181012 BRCA2-Halo PCNA-iRFP IR tracking	WT G10 +IR	926.4	0.00126146	-0.0588859	636	2
002 30ms181012 BRCA2-Halo PCNA-iRFP IR tracking	WT G10 +IR	927.2	0.585421	0.346217	603	0
002 30ms181012 BRCA2-Halo PCNA-iRFP IR tracking	WT G10 +IR	931.4	0.0042639	0.0925176	575	2
002 30ms181012 BRCA2-Halo PCNA-iRFP IR tracking	WT G10 +IR	934.1	4.70193	0.602856	621	0
002 30ms181012 BRCA2-Halo PCNA-iRFP IR tracking	WT G10 +IR	938.1	1.04994	0.367024	611	0
002 30ms181012 BRCA2-Halo PCNA-iRFP IR tracking	WT G10 +IR	939.1	1.01183	0.252696	609	0
002 30ms181012 BRCA2-Halo PCNA-iRFP IR tracking	WT G10 +IR	945.1	2.48637	0.521756	617	0
002 30ms181012 BRCA2-Halo PCNA-iRFP IR tracking	WT G10 +IR	946.3	0.326136	0.0874833	639	0
002 30ms181012 BRCA2-Halo PCNA-iRFP IR tracking	WT G10 +IR	955.1	5.05804	0.544573	645	0
002 30ms181012 BRCA2-Halo PCNA-iRFP IR tracking	WT G10 +IR	959.1	3.28059	0.532009	652	0
002 30ms181012 BRCA2-Halo PCNA-iRFP IR tracking	WT G10 +IR	968.2	0.00125594	0.0275484	656	2
002 30ms181012 BRCA2-Halo PCNA-iRFP IR tracking	WT G10 +IR	976.1	0.891436	0.0904838	659	0
002 30ms181012 BRCA2-Halo PCNA-iRFP IR tracking	WT G10 +IR	978.3	1.1502	0.369872	650	0
002 30ms181012 BRCA2-Halo PCNA-iRFP IR tracking	WT G10 +IR	979.2	0.00166876	0.105855	579	2
002 30ms181012 BRCA2-Halo PCNA-iRFP IR tracking	WT G10 +IR	980.1	0.719445	0.222154	673	0
002 30ms181012 BRCA2-Halo PCNA-iRFP IR tracking	WT G10 +IR	986.3	0.975112	0.445635	679	0
002 30ms181012 BRCA2-Halo PCNA-iRFP IR tracking	WT G10 +IR	993.1	2.77678	0.380699	695	0
002 30ms181012 BRCA2-Halo PCNA-iRFP IR tracking	WT G10 +IR	994.4	0.233061	0.395029	702	1
002 30ms181012 BRCA2-Halo PCNA-iRFP IR tracking	WT G10 +IR	997.1	3.42147	0.518604	706	0
002 30ms181012 BRCA2-Halo PCNA-iRFP IR tracking	WT G10 +IR	1001.6	0.0272343	0.266478	708	1
002 30ms181012 BRCA2-Halo PCNA-iRFP IR tracking	WT G10 +IR	1002.1	2.49543	0.702068	702	0
002 30ms181012 BRCA2-Halo PCNA-iRFP IR tracking	WT G10 +IR	1007.1	1.34171	0.157287	718	0
002 30ms181012 BRCA2-Halo PCNA-iRFP IR tracking	WT G10 +IR	1015.1	0.00173098	0.289755	670	2
002 30ms181012 BRCA2-Halo PCNA-iRFP IR tracking	WT G10 +IR	1017.1	6.64821	0.5871	732	0
002 30ms181012 BRCA2-Halo PCNA-iRFP IR tracking	WT G10 +IR	1018.3	0.00549558	0.232644	737	2
002 30ms181012 BRCA2-Halo PCNA-iRFP IR tracking	WT G10 +IR	1022.1	3.09352	0.50455	744	0
002 30ms181012 BRCA2-Halo PCNA-iRFP IR tracking	WT G10 +IR	1023.5	0.943328	0.181199	755	0
002 30ms181012 BRCA2-Halo PCNA-iRFP IR tracking	WT G10 +IR	1026.4	0.00314585	0.373323	754	2
002 30ms181012 BRCA2-Halo PCNA-iRFP IR tracking	WT G10 +IR	1028.2	0.00397503	0.202013	730	2
002 30ms181012 BRCA2-Halo PCNA-iRFP IR tracking	WT G10 +IR	1029.1	0.00895851	0.28451	628	2
002 30ms181012 BRCA2-Halo PCNA-iRFP IR tracking	WT G10 +IR	1029.15	0.0164305	0.362412	682	2
002 30ms181012 BRCA2-Halo PCNA-iRFP IR tracking	WT G10 +IR	1029.17	0.00915849	0.201252	707	2
002 30ms181012 BRCA2-Halo PCNA-iRFP IR tracking	WT G10 +IR	1029.19	0.00907305	0.293967	728	2
002 30ms181012 BRCA2-Halo PCNA-iRFP IR tracking	WT G10 +IR	1029.3	0.0161356	0.411403	645	2
002 30ms181012 BRCA2-Halo PCNA-iRFP IR tracking	WT G10 +IR	1037.1	0.62214	0.439069	766	0
002 30ms181012 BRCA2-Halo PCNA-iRFP IR tracking	WT G10 +IR	1038.1	0.000667841	0.214904	796	2
002 30ms181012 BRCA2-Halo PCNA-iRFP IR tracking	WT G10 +IR	1038.14	2.81922	0.54721	905	1
002 30ms181012 BRCA2-Halo PCNA-iRFP IR tracking	WT G10 +IR	1038.17	0.00628314	0.277668	933	1
002 30ms181012 BRCA2-Halo PCNA-iRFP IR tracking	WT G10 +IR	1038.18	0.00657737	0.0923566	944	2
002 30ms181012 BRCA2-Halo PCNA-iRFP IR tracking	WT G10 +IR	1038.24	0.00567028	-0.0286326	976	1
002 30ms181012 BRCA2-Halo PCNA-iRFP IR tracking	WT G10 +IR	1038.4	0.263811	0.0434114	713	0
002 30ms181012 BRCA2-Halo PCNA-iRFP IR tracking	WT G10 +IR	1038.5	0.00115889	0.101039	724	2
002 30ms181012 BRCA2-Halo PCNA-iRFP IR tracking	WT G10 +IR	1038.8	0.026537	0.220672	767	1
002 30ms181012 BRCA2-Halo PCNA-iRFP IR tracking	WT G10 +IR	1051.1	0.000192415	0.0977728	784	2
002 30ms181012 BRCA2-Halo PCNA-iRFP IR tracking	WT G10 +IR	1052.2	0.00399589	0.193761	764	2
002 30ms181012 BRCA2-Halo PCNA-iRFP IR tracking	WT G10 +IR	1055.2	0.150625	0.422808	769	1
002 30ms181012 BRCA2-Halo PCNA-iRFP IR tracking	WT G10 +IR	1055.3	0.854081	-0.0162381	794	0
002 30ms181012 BRCA2-Halo PCNA-iRFP IR tracking	WT G10 +IR	1056.1	0.0133374	0.162421	777	1
002 30ms181012 BRCA2-Halo PCNA-iRFP IR tracking	WT G10 +IR	1056.6	0.0126476	0.379108	804	2
002 30ms181012 BRCA2-Halo PCNA-iRFP IR tracking	WT G10 +IR	1056.7	0.00608073	0.195097	820	1
002 30ms181012 BRCA2-Halo PCNA-iRFP IR tracking	WT G10 +IR	1057.1	0.597431	0.369593	797	0
002 30ms181012 BRCA2-Halo PCNA-iRFP IR tracking	WT G10 +IR	1058.1	0.00814611	0.214119	785	2
002 30ms181012 BRCA2-Halo PCNA-iRFP IR tracking	WT G10 +IR	1058.2	0.0303136	0.391731	799	1
002 30ms181012 BRCA2-Halo PCNA-iRFP IR tracking	WT G10 +IR	1060.1	2.29635	0.501061	804	0
002 30ms181012 BRCA2-Halo PCNA-iRFP IR tracking	WT G10 +IR	1068.1	0.00631751	0.069182	811	2
002 30ms181012 BRCA2-Halo PCNA-iRFP IR tracking	WT G10 +IR	1070.2	0.0201538	0.247198	798	1
002 30ms181012 BRCA2-Halo PCNA-iRFP IR tracking	WT G10 +IR	1070.4	0.0351161	0.362331	870	1
002 30ms181012 BRCA2-Halo PCNA-iRFP IR tracking	WT G10 +IR	1070.6	0.000413079	0.191281	889	2
002 30ms181012 BRCA2-Halo PCNA-iRFP IR tracking	WT G10 +IR	1072.1	3.13634	0.575649	819	0
002 30ms181012 BRCA2-Halo PCNA-iRFP IR tracking	WT G10 +IR	1076.1	0.00239797	0.1375	807	2
002 30ms181012 BRCA2-Halo PCNA-iRFP IR tracking	WT G10 +IR	1080.2	0.00420872	0.0891652	837	2
002 30ms181012 BRCA2-Halo PCNA-iRFP IR tracking	WT G10 +IR	1081.1	1.01911	0.254585	842	0
002 30ms181012 BRCA2-Halo PCNA-iRFP IR tracking	WT G10 +IR	1083.1	0.426949	0.00895095	836	0
002 30ms181012 BRCA2-Halo PCNA-iRFP IR tracking	WT G10 +IR	1086.2	0.000963166	0.244341	853	2
002 30ms181012 BRCA2-Halo PCNA-iRFP IR tracking	WT G10 +IR	1087.1	2.16698	0.437761	844	0
002 30ms181012 BRCA2-Halo PCNA-iRFP IR tracking	WT G10 +IR	1088.1	0.00135968	0.258434	776	2
002 30ms181012 BRCA2-Halo PCNA-iRFP IR tracking	WT G10 +IR	1089.2	0.283208	0.706172	835	1
002 30ms181012 BRCA2-Halo PCNA-iRFP IR tracking	WT G10 +IR	1089.5	0.875887	0.160851	860	0
002 30ms181012 BRCA2-Halo PCNA-iRFP IR tracking	WT G10 +IR	1092.1	1.16266	0.206081	868	0
002 30ms181012 BRCA2-Halo PCNA-iRFP IR tracking	WT G10 +IR	1095.1	0.994694	0.376379	868	0
002 30ms181012 BRCA2-Halo PCNA-iRFP IR tracking	WT G10 +IR	1098.1	3.18932	0.368717	873	0
002 30ms181012 BRCA2-Halo PCNA-iRFP IR tracking	WT G10 +IR	1099.2	0.000844788	0.19259	844	2
002 30ms181012 BRCA2-Halo PCNA-iRFP IR tracking	WT G10 +IR	1100.4	0.00770481	0.279631	902	2
002 30ms181012 BRCA2-Halo PCNA-iRFP IR tracking	WT G10 +IR	1100.6	0.00597632	0.173252	991	2
002 30ms181012 BRCA2-Halo PCNA-iRFP IR tracking	WT G10 +IR	1100.8	0.00621723	0.125301	1025	2
002 30ms181012 BRCA2-Halo PCNA-iRFP IR tracking	WT G10 +IR	1103.1	0.000464662	-0.0341589	872	2
002 30ms181012 BRCA2-Halo PCNA-iRFP IR tracking	WT G10 +IR	1108.1	0.00406591	0.0555791	897	2
002 30ms181012 BRCA2-Halo PCNA-iRFP IR tracking	WT G10 +IR	1111.1	1.83575	0.282793	899	0
002 30ms181012 BRCA2-Halo PCNA-iRFP IR tracking	WT G10 +IR	1115.11	0.0392371	0.412252	907	2
002 30ms181012 BRCA2-Halo PCNA-iRFP IR tracking	WT G10 +IR	1123.2	0.03674	0.260075	924	1
002 30ms181012 BRCA2-Halo PCNA-iRFP IR tracking	WT G10 +IR	1127.2	0.0059636	0.00455064	924	1
002 30ms181012 BRCA2-Halo PCNA-iRFP IR tracking	WT G10 +IR	1134.2	0.000717649	0.0731062	956	2
002 30ms181012 BRCA2-Halo PCNA-iRFP IR tracking	WT G10 +IR	1136.1	0.833523	0.599075	942	0
002 30ms181012 BRCA2-Halo PCNA-iRFP IR tracking	WT G10 +IR	1137.1	0.000619824	0.133827	925	2
002 30ms181012 BRCA2-Halo PCNA-iRFP IR tracking	WT G10 +IR	1137.2	1.25352	0.117672	980	0
002 30ms181012 BRCA2-Halo PCNA-iRFP IR tracking	WT G10 +IR	1139.1	0.000525008	0.215847	951	2
002 30ms181012 BRCA2-Halo PCNA-iRFP IR tracking	WT G10 +IR	1143.2	0.00128822	0.127525	973	2
002 30ms181012 BRCA2-Halo PCNA-iRFP IR tracking	WT G10 +IR	1147.1	0.583797	0.258553	978	0
002 30ms181012 BRCA2-Halo PCNA-iRFP IR tracking	WT G10 +IR	1147.2	0.0160445	0.219522	1003	1
002 30ms181012 BRCA2-Halo PCNA-iRFP IR tracking	WT G10 +IR	1147.8	0.140537	0.521475	1032	1
002 30ms181012 BRCA2-Halo PCNA-iRFP IR tracking	WT G10 +IR	1149.3	0.0833206	0.415962	978	1
002 30ms181012 BRCA2-Halo PCNA-iRFP IR tracking	WT G10 +IR	1149.7	0.176652	0.47402	1026	1
002 30ms181012 BRCA2-Halo PCNA-iRFP IR tracking	WT G10 +IR	1150.3	0.00702714	-0.00342942	944	1
002 30ms181012 BRCA2-Halo PCNA-iRFP IR tracking	WT G10 +IR	1150.8	0.0104991	0.204907	980	1
002 30ms181012 BRCA2-Halo PCNA-iRFP IR tracking	WT G10 +IR	1152.1	0.000688262	0.142899	970	2
002 30ms181012 BRCA2-Halo PCNA-iRFP IR tracking	WT G10 +IR	1154.3	0.0196443	0.401263	1007	1
002 30ms181012 BRCA2-Halo PCNA-iRFP IR tracking	WT G10 +IR	1158.1	2.04038	0.348507	1013	0
002 30ms181012 BRCA2-Halo PCNA-iRFP IR tracking	WT G10 +IR	1165.6	0.0863364	0.534617	1030	1
002 30ms181012 BRCA2-Halo PCNA-iRFP IR tracking	WT G10 +IR	1166.1	0.00336272	0.283879	1001	2
002 30ms181012 BRCA2-Halo PCNA-iRFP IR tracking	WT G10 +IR	1171.1	0.847988	0.173037	1042	0
002 30ms181012 BRCA2-Halo PCNA-iRFP IR tracking	WT G10 +IR	1177.1	0.00208147	0.197985	1044	2
002 30ms181012 BRCA2-Halo PCNA-iRFP IR tracking	WT G10 +IR	1177.3	0.00124885	0.142409	1082	2
002 30ms181012 BRCA2-Halo PCNA-iRFP IR tracking	WT G10 +IR	1177.5	0.000709434	-0.101512	1136	2
002 30ms181012 BRCA2-Halo PCNA-iRFP IR tracking	WT G10 +IR	1179.1	0.00209644	0.242367	1032	2
002 30ms181012 BRCA2-Halo PCNA-iRFP IR tracking	WT G10 +IR	1181.1	1.92767	0.457866	1061	0
002 30ms181012 BRCA2-Halo PCNA-iRFP IR tracking	WT G10 +IR	1182.2	0.00124395	0.00256283	929	2
002 30ms181012 BRCA2-Halo PCNA-iRFP IR tracking	WT G10 +IR	1182.4	0.000171675	0.0547647	1059	2
002 30ms181012 BRCA2-Halo PCNA-iRFP IR tracking	WT G10 +IR	1183.1	2.3145	0.400355	1085	0
002 30ms181012 BRCA2-Halo PCNA-iRFP IR tracking	WT G10 +IR	1186.2	0.000353736	0.149657	1081	2
002 30ms181012 BRCA2-Halo PCNA-iRFP IR tracking	WT G10 +IR	1189.1	2.45055	0.570537	1107	0
002 30ms181012 BRCA2-Halo PCNA-iRFP IR tracking	WT G10 +IR	1191.1	1.03307	0.402436	1115	0
002 30ms181012 BRCA2-Halo PCNA-iRFP IR tracking	WT G10 +IR	1195.1	0.00123787	0.143258	1120	2
002 30ms181012 BRCA2-Halo PCNA-iRFP IR tracking	WT G10 +IR	1196.1	0.000768178	0.11044	985	2
002 30ms181012 BRCA2-Halo PCNA-iRFP IR tracking	WT G10 +IR	1196.4	0.0688408	0.339858	1120	1
002 30ms181012 BRCA2-Halo PCNA-iRFP IR tracking	WT G10 +IR	1196.5	1.69098	0.509489	1136	0
002 30ms181012 BRCA2-Halo PCNA-iRFP IR tracking	WT G10 +IR	1200.4	0.130215	0.393045	1135	1
002 30ms181012 BRCA2-Halo PCNA-iRFP IR tracking	WT G10 +IR	1216.3	0.00243837	0.10597	1160	2
002 30ms181012 BRCA2-Halo PCNA-iRFP IR tracking	WT G10 +IR	1218.1	0.00707481	0.290088	1132	2
002 30ms181012 BRCA2-Halo PCNA-iRFP IR tracking	WT G10 +IR	1218.6	0.00371591	0.0641517	1160	2
002 30ms181012 BRCA2-Halo PCNA-iRFP IR tracking	WT G10 +IR	1219.1	0.785176	0.474617	1193	0
002 30ms181012 BRCA2-Halo PCNA-iRFP IR tracking	WT G10 +IR	1220.1	0.00120358	0.179176	1134	2
002 30ms181012 BRCA2-Halo PCNA-iRFP IR tracking	WT G10 +IR	1221.1	0.00690164	0.293527	1196	2
002 30ms181012 BRCA2-Halo PCNA-iRFP IR tracking	WT G10 +IR	1222.1	0.00088773	0.0577024	1084	2
002 30ms181012 BRCA2-Halo PCNA-iRFP IR tracking	WT G10 +IR	1231.1	0.0729245	0.316401	1236	1
002 30ms181012 BRCA2-Halo PCNA-iRFP IR tracking	WT G10 +IR	1232.1	0.00355545	0.224785	1234	2
002 30ms181012 BRCA2-Halo PCNA-iRFP IR tracking	WT G10 +IR	1235.1	0.545024	0.0314328	1243	0
002 30ms181012 BRCA2-Halo PCNA-iRFP IR tracking	WT G10 +IR	1236.1	0.00514662	0.36004	1228	2
002 30ms181012 BRCA2-Halo PCNA-iRFP IR tracking	WT G10 +IR	1238.1	0.178245	0.450199	1217	1
002 30ms181012 BRCA2-Halo PCNA-iRFP IR tracking	WT G10 +IR	1240.2	0.00605142	0.28883	1192	2
002 30ms181012 BRCA2-Halo PCNA-iRFP IR tracking	WT G10 +IR	1245.1	0.00562142	0.305061	1237	2
002 30ms181012 BRCA2-Halo PCNA-iRFP IR tracking	WT G10 +IR	1245.3	0.392689	0.42492	1271	0
002 30ms181012 BRCA2-Halo PCNA-iRFP IR tracking	WT G10 +IR	1248.2	0.0942987	0.255366	1263	1
002 30ms181012 BRCA2-Halo PCNA-iRFP IR tracking	WT G10 +IR	1248.6	0.0622391	0.446595	1287	1
[truncated: 4,938 more rows]

## Sheet: dDBD -IR
cellID	condition	tracklet ID	D[um/s2]	Smmss	frame	state
001 30ms181005 BRCA2-Halo PCNA-iRFP IR tracking	dDBD E4 -IR	1.1	0.0623208	0.423628	0	1
001 30ms181005 BRCA2-Halo PCNA-iRFP IR tracking	dDBD E4 -IR	2.1	1.72683	0.581798	0	0
001 30ms181005 BRCA2-Halo PCNA-iRFP IR tracking	dDBD E4 -IR	7.2	0.0428525	0.229621	24	1
001 30ms181005 BRCA2-Halo PCNA-iRFP IR tracking	dDBD E4 -IR	7.3	0.554521	0.180551	38	0
001 30ms181005 BRCA2-Halo PCNA-iRFP IR tracking	dDBD E4 -IR	8.1	0.00211624	0.0825732	14	2
001 30ms181005 BRCA2-Halo PCNA-iRFP IR tracking	dDBD E4 -IR	9.2	0.0276293	0.172205	5	1
001 30ms181005 BRCA2-Halo PCNA-iRFP IR tracking	dDBD E4 -IR	12.1	0.00202794	-0.00608068	36	1
001 30ms181005 BRCA2-Halo PCNA-iRFP IR tracking	dDBD E4 -IR	13.2	0.157798	0.543089	13	1
001 30ms181005 BRCA2-Halo PCNA-iRFP IR tracking	dDBD E4 -IR	13.6	0.295483	0.552684	45	1
001 30ms181005 BRCA2-Halo PCNA-iRFP IR tracking	dDBD E4 -IR	13.8	0.198276	0.48401	63	1
001 30ms181005 BRCA2-Halo PCNA-iRFP IR tracking	dDBD E4 -IR	17.3	0.713126	0.0257936	52	0
001 30ms181005 BRCA2-Halo PCNA-iRFP IR tracking	dDBD E4 -IR	17.7	0.364609	0.720309	82	1
001 30ms181005 BRCA2-Halo PCNA-iRFP IR tracking	dDBD E4 -IR	19.4	1.2358	0.0847362	42	0
001 30ms181005 BRCA2-Halo PCNA-iRFP IR tracking	dDBD E4 -IR	19.6	0.36618	0.202164	54	0
001 30ms181005 BRCA2-Halo PCNA-iRFP IR tracking	dDBD E4 -IR	20.1	0.00225729	0.0738164	10	2
001 30ms181005 BRCA2-Halo PCNA-iRFP IR tracking	dDBD E4 -IR	22.1	0.00913385	0.371924	62	2
001 30ms181005 BRCA2-Halo PCNA-iRFP IR tracking	dDBD E4 -IR	27.2	0.00206138	0.026092	47	2
001 30ms181005 BRCA2-Halo PCNA-iRFP IR tracking	dDBD E4 -IR	27.4	0.000129074	-0.0228415	72	2
001 30ms181005 BRCA2-Halo PCNA-iRFP IR tracking	dDBD E4 -IR	28.1	0.134808	0.493747	73	1
001 30ms181005 BRCA2-Halo PCNA-iRFP IR tracking	dDBD E4 -IR	30.4	0.108073	0.467077	100	1
001 30ms181005 BRCA2-Halo PCNA-iRFP IR tracking	dDBD E4 -IR	35.6	0.00131634	0.0261901	73	2
001 30ms181005 BRCA2-Halo PCNA-iRFP IR tracking	dDBD E4 -IR	35.9	0.00224387	0.0220503	104	2
001 30ms181005 BRCA2-Halo PCNA-iRFP IR tracking	dDBD E4 -IR	37.1	0.227528	0.488796	90	1
001 30ms181005 BRCA2-Halo PCNA-iRFP IR tracking	dDBD E4 -IR	43.1	0.840803	0.584009	114	0
001 30ms181005 BRCA2-Halo PCNA-iRFP IR tracking	dDBD E4 -IR	47.2	0.00106773	0.132465	171	2
001 30ms181005 BRCA2-Halo PCNA-iRFP IR tracking	dDBD E4 -IR	49.4	0.00978699	0.483562	140	2
001 30ms181005 BRCA2-Halo PCNA-iRFP IR tracking	dDBD E4 -IR	49.5	0.221949	0.451757	173	1
001 30ms181005 BRCA2-Halo PCNA-iRFP IR tracking	dDBD E4 -IR	51.2	0.29401	0.537844	163	1
001 30ms181005 BRCA2-Halo PCNA-iRFP IR tracking	dDBD E4 -IR	51.4	0.263867	0.512096	188	1
001 30ms181005 BRCA2-Halo PCNA-iRFP IR tracking	dDBD E4 -IR	53.3	0.0157952	0.120171	201	1
001 30ms181005 BRCA2-Halo PCNA-iRFP IR tracking	dDBD E4 -IR	54.2	0.137089	0.511622	195	1
001 30ms181005 BRCA2-Halo PCNA-iRFP IR tracking	dDBD E4 -IR	57.1	0.000341516	0.0821106	190	2
001 30ms181005 BRCA2-Halo PCNA-iRFP IR tracking	dDBD E4 -IR	57.3	0.000413001	0.0736859	241	2
001 30ms181005 BRCA2-Halo PCNA-iRFP IR tracking	dDBD E4 -IR	58.5	0.0014438	0.018375	253	1
001 30ms181005 BRCA2-Halo PCNA-iRFP IR tracking	dDBD E4 -IR	61.1	0.000877362	0.0983805	224	2
001 30ms181005 BRCA2-Halo PCNA-iRFP IR tracking	dDBD E4 -IR	63.1	0.214023	0.372585	250	0
001 30ms181005 BRCA2-Halo PCNA-iRFP IR tracking	dDBD E4 -IR	64.1	0.0102774	0.345779	268	2
001 30ms181005 BRCA2-Halo PCNA-iRFP IR tracking	dDBD E4 -IR	64.3	0.00572688	0.214619	309	2
001 30ms181005 BRCA2-Halo PCNA-iRFP IR tracking	dDBD E4 -IR	66.1	1.41804	0.0890846	266	0
001 30ms181005 BRCA2-Halo PCNA-iRFP IR tracking	dDBD E4 -IR	67.1	0.00142542	0.131474	0	2
001 30ms181005 BRCA2-Halo PCNA-iRFP IR tracking	dDBD E4 -IR	67.5	0.00329029	0.235797	192	2
001 30ms181005 BRCA2-Halo PCNA-iRFP IR tracking	dDBD E4 -IR	67.8	0.000960485	0.161498	240	2
001 30ms181005 BRCA2-Halo PCNA-iRFP IR tracking	dDBD E4 -IR	68.6	0.00210135	0.108343	290	2
001 30ms181005 BRCA2-Halo PCNA-iRFP IR tracking	dDBD E4 -IR	68.7	0.00468684	0.200794	305	1
001 30ms181005 BRCA2-Halo PCNA-iRFP IR tracking	dDBD E4 -IR	71.1	2.07533	0.388881	280	0
001 30ms181005 BRCA2-Halo PCNA-iRFP IR tracking	dDBD E4 -IR	73.2	0.000885877	0.109758	231	2
001 30ms181005 BRCA2-Halo PCNA-iRFP IR tracking	dDBD E4 -IR	79.1	0.0048676	0.297832	352	2
001 30ms181005 BRCA2-Halo PCNA-iRFP IR tracking	dDBD E4 -IR	80.11	0.721011	0.0418716	378	0
001 30ms181005 BRCA2-Halo PCNA-iRFP IR tracking	dDBD E4 -IR	81.1	1.17865	0.362869	367	0
001 30ms181005 BRCA2-Halo PCNA-iRFP IR tracking	dDBD E4 -IR	84.1	0.329925	0.0281697	411	0
001 30ms181005 BRCA2-Halo PCNA-iRFP IR tracking	dDBD E4 -IR	86.1	0.0818242	0.50856	397	1
001 30ms181005 BRCA2-Halo PCNA-iRFP IR tracking	dDBD E4 -IR	86.2	0.487201	0.216738	413	0
001 30ms181005 BRCA2-Halo PCNA-iRFP IR tracking	dDBD E4 -IR	89.4	0.00258319	0.159266	458	2
001 30ms181005 BRCA2-Halo PCNA-iRFP IR tracking	dDBD E4 -IR	93.1	0.00267898	0.166428	390	2
001 30ms181005 BRCA2-Halo PCNA-iRFP IR tracking	dDBD E4 -IR	93.3	0.00121344	0.0531229	443	2
001 30ms181005 BRCA2-Halo PCNA-iRFP IR tracking	dDBD E4 -IR	97.1	0.291038	0.253038	517	0
001 30ms181005 BRCA2-Halo PCNA-iRFP IR tracking	dDBD E4 -IR	98.11	0.291453	0.0421918	529	0
001 30ms181005 BRCA2-Halo PCNA-iRFP IR tracking	dDBD E4 -IR	98.12	0.160844	0.581993	541	1
001 30ms181005 BRCA2-Halo PCNA-iRFP IR tracking	dDBD E4 -IR	98.16	0.368306	0.670377	574	1
001 30ms181005 BRCA2-Halo PCNA-iRFP IR tracking	dDBD E4 -IR	98.18	0.0534973	0.151453	589	1
001 30ms181005 BRCA2-Halo PCNA-iRFP IR tracking	dDBD E4 -IR	101.1	0.439345	0.333694	567	0
001 30ms181005 BRCA2-Halo PCNA-iRFP IR tracking	dDBD E4 -IR	107.3	0.00350448	0.160457	669	2
001 30ms181005 BRCA2-Halo PCNA-iRFP IR tracking	dDBD E4 -IR	107.9	0.0129982	0.423088	703	2
001 30ms181005 BRCA2-Halo PCNA-iRFP IR tracking	dDBD E4 -IR	108.4	0.00855762	0.459698	746	2
001 30ms181005 BRCA2-Halo PCNA-iRFP IR tracking	dDBD E4 -IR	109.1	0.97002	0.265399	778	0
001 30ms181005 BRCA2-Halo PCNA-iRFP IR tracking	dDBD E4 -IR	111.1	0.000724495	0.0974531	777	2
001 30ms181005 BRCA2-Halo PCNA-iRFP IR tracking	dDBD E4 -IR	113.1	0.005515	0.190725	816	2
001 30ms181005 BRCA2-Halo PCNA-iRFP IR tracking	dDBD E4 -IR	122.1	0.00726517	0.277011	866	2
001 30ms181005 BRCA2-Halo PCNA-iRFP IR tracking	dDBD E4 -IR	122.1	0.0107851	0.357161	931	2
001 30ms181005 BRCA2-Halo PCNA-iRFP IR tracking	dDBD E4 -IR	122.2	0.015055	0.240174	990	2
001 30ms181005 BRCA2-Halo PCNA-iRFP IR tracking	dDBD E4 -IR	122.21	0.0190984	0.204923	1005	1
001 30ms181005 BRCA2-Halo PCNA-iRFP IR tracking	dDBD E4 -IR	124.1	1.0659	0.551992	941	1
001 30ms181005 BRCA2-Halo PCNA-iRFP IR tracking	dDBD E4 -IR	126.1	0.0300108	0.380635	1003	2
001 30ms181005 BRCA2-Halo PCNA-iRFP IR tracking	dDBD E4 -IR	127.3	7.57006	0.64312	1018	0
001 30ms181005 BRCA2-Halo PCNA-iRFP IR tracking	dDBD E4 -IR	129.2	0.000353262	0.12133	1040	2
001 30ms181005 BRCA2-Halo PCNA-iRFP IR tracking	dDBD E4 -IR	131.1	2.53554	0.367751	1098	0
001 30ms181005 BRCA2-Halo PCNA-iRFP IR tracking	dDBD E4 -IR	134.1	0.00303116	0.189238	1171	2
001 30ms181005 BRCA2-Halo PCNA-iRFP IR tracking	dDBD E4 -IR	134.3	0.00113111	0.159744	1206	2
001 30ms181005 BRCA2-Halo PCNA-iRFP IR tracking	dDBD E4 -IR	134.7	0.00801894	0.268611	1229	2
001 30ms181005 BRCA2-Halo PCNA-iRFP IR tracking	dDBD E4 -IR	137.2	0.139812	0.455616	1260	1
001 30ms181005 BRCA2-Halo PCNA-iRFP IR tracking	dDBD E4 -IR	138.3	0.114708	0.49015	1312	1
001 30ms181005 BRCA2-Halo PCNA-iRFP IR tracking	dDBD E4 -IR	138.4	1.02287	0.0280691	1331	0
001 30ms181005 BRCA2-Halo PCNA-iRFP IR tracking	dDBD E4 -IR	139.1	0.000964673	0.0989792	1281	2
001 30ms181005 BRCA2-Halo PCNA-iRFP IR tracking	dDBD E4 -IR	139.3	0.00293004	0.416873	1317	2
001 30ms181005 BRCA2-Halo PCNA-iRFP IR tracking	dDBD E4 -IR	140.2	0.564016	0.475716	1325	0
001 30ms181005 BRCA2-Halo PCNA-iRFP IR tracking	dDBD E4 -IR	142.2	0.00340731	0.0791051	1358	2
001 30ms181005 BRCA2-Halo PCNA-iRFP IR tracking	dDBD E4 -IR	146.1	0.254093	0.43473	1344	1
001 30ms181005 BRCA2-Halo PCNA-iRFP IR tracking	dDBD E4 -IR	146.12	0.0100881	0.227771	1410	2
001 30ms181005 BRCA2-Halo PCNA-iRFP IR tracking	dDBD E4 -IR	146.7	0.0787444	0.265409	1380	1
001 30ms181005 BRCA2-Halo PCNA-iRFP IR tracking	dDBD E4 -IR	146.9	0.138289	0.630915	1396	1
001 30ms181005 BRCA2-Halo PCNA-iRFP IR tracking	dDBD E4 -IR	149.1	0.00174047	0.194199	1447	2
001 30ms181005 BRCA2-Halo PCNA-iRFP IR tracking	dDBD E4 -IR	151.1	2.58259	0.364186	1539	0
001 30ms181005 BRCA2-Halo PCNA-iRFP IR tracking	dDBD E4 -IR	155.1	0.00112359	0.143898	1591	2
001 30ms181005 BRCA2-Halo PCNA-iRFP IR tracking	dDBD E4 -IR	156.3	0.0476787	0.350638	1645	1
001 30ms181005 BRCA2-Halo PCNA-iRFP IR tracking	dDBD E4 -IR	157.1	0.000662852	0.0612878	1651	2
001 30ms181005 BRCA2-Halo PCNA-iRFP IR tracking	dDBD E4 -IR	159.1	1.46187	0.305143	1739	0
001 30ms181005 BRCA2-Halo PCNA-iRFP IR tracking	dDBD E4 -IR	161.1	1.10529	0.526689	1768	0
001 30ms181005 BRCA2-Halo PCNA-iRFP IR tracking	dDBD E4 -IR	163.1	0.00127128	0.143244	1637	2
001 30ms181005 BRCA2-Halo PCNA-iRFP IR tracking	dDBD E4 -IR	166.2	0.132152	0.398954	1864	1
001 30ms181005 BRCA2-Halo PCNA-iRFP IR tracking	dDBD E4 -IR	169.2	0.194804	0.414708	1930	1
001 30ms181005 BRCA2-Halo PCNA-iRFP IR tracking	dDBD E4 -IR	171.1	0.00235003	0.156461	1830	2
001 30ms181010 BRCA2-Halo PCNA-iRFP IR tracking	dDBD E4 -IR	8.2	0.00518767	0.356263	7	2
001 30ms181010 BRCA2-Halo PCNA-iRFP IR tracking	dDBD E4 -IR	9.1	0.0480789	0.291398	0	1
001 30ms181010 BRCA2-Halo PCNA-iRFP IR tracking	dDBD E4 -IR	11.1	0.00638076	0.326111	6	2
001 30ms181010 BRCA2-Halo PCNA-iRFP IR tracking	dDBD E4 -IR	15.1	0.285959	0.0737753	0	0
001 30ms181010 BRCA2-Halo PCNA-iRFP IR tracking	dDBD E4 -IR	16.1	4.29768	0.555925	21	0
001 30ms181010 BRCA2-Halo PCNA-iRFP IR tracking	dDBD E4 -IR	18.3	2.97843	0.451073	21	0
001 30ms181010 BRCA2-Halo PCNA-iRFP IR tracking	dDBD E4 -IR	19.1	0.974053	0.236423	26	0
001 30ms181010 BRCA2-Halo PCNA-iRFP IR tracking	dDBD E4 -IR	21.5	0.00205758	0.0227846	61	1
001 30ms181010 BRCA2-Halo PCNA-iRFP IR tracking	dDBD E4 -IR	21.7	0.00313764	0.0270166	82	1
001 30ms181010 BRCA2-Halo PCNA-iRFP IR tracking	dDBD E4 -IR	24.1	0.00380405	0.10995	0	2
001 30ms181010 BRCA2-Halo PCNA-iRFP IR tracking	dDBD E4 -IR	25.1	0.0009903	0.116835	0	2
001 30ms181010 BRCA2-Halo PCNA-iRFP IR tracking	dDBD E4 -IR	28.1	0.00388099	-0.11185	0	1
001 30ms181010 BRCA2-Halo PCNA-iRFP IR tracking	dDBD E4 -IR	30.1	0.0201095	0.128154	41	1
001 30ms181010 BRCA2-Halo PCNA-iRFP IR tracking	dDBD E4 -IR	34.1	0.761808	0.334637	63	0
001 30ms181010 BRCA2-Halo PCNA-iRFP IR tracking	dDBD E4 -IR	36.1	3.91653	0.47321	63	0
001 30ms181010 BRCA2-Halo PCNA-iRFP IR tracking	dDBD E4 -IR	38.1	0.00180925	0.149204	0	2
001 30ms181010 BRCA2-Halo PCNA-iRFP IR tracking	dDBD E4 -IR	38.4	0.00776818	0.0612229	83	2
001 30ms181010 BRCA2-Halo PCNA-iRFP IR tracking	dDBD E4 -IR	39.1	0.00191949	0.203681	0	2
001 30ms181010 BRCA2-Halo PCNA-iRFP IR tracking	dDBD E4 -IR	39.5	0.00516728	0.289295	73	2
001 30ms181010 BRCA2-Halo PCNA-iRFP IR tracking	dDBD E4 -IR	40.2	0.238942	0.481603	71	1
001 30ms181010 BRCA2-Halo PCNA-iRFP IR tracking	dDBD E4 -IR	46.1	0.0076067	0.120158	3	1
001 30ms181010 BRCA2-Halo PCNA-iRFP IR tracking	dDBD E4 -IR	46.16	0.00124608	-0.124457	146	2
001 30ms181010 BRCA2-Halo PCNA-iRFP IR tracking	dDBD E4 -IR	46.25	0.0561658	-0.13906	208	2
001 30ms181010 BRCA2-Halo PCNA-iRFP IR tracking	dDBD E4 -IR	46.6	0.011126	0.315745	63	1
001 30ms181010 BRCA2-Halo PCNA-iRFP IR tracking	dDBD E4 -IR	57.1	0.557201	0.0767409	119	0
001 30ms181010 BRCA2-Halo PCNA-iRFP IR tracking	dDBD E4 -IR	59.4	0.0146217	-0.116494	130	0
001 30ms181010 BRCA2-Halo PCNA-iRFP IR tracking	dDBD E4 -IR	63.1	0.0652682	-0.0124819	125	0
001 30ms181010 BRCA2-Halo PCNA-iRFP IR tracking	dDBD E4 -IR	64.4	1.15069	0.571301	124	0
001 30ms181010 BRCA2-Halo PCNA-iRFP IR tracking	dDBD E4 -IR	65.1	2.69002	0.731021	129	0
001 30ms181010 BRCA2-Halo PCNA-iRFP IR tracking	dDBD E4 -IR	65.2	0.00501023	0.325043	154	2
001 30ms181010 BRCA2-Halo PCNA-iRFP IR tracking	dDBD E4 -IR	66.1	0.429214	0.0687713	130	0
001 30ms181010 BRCA2-Halo PCNA-iRFP IR tracking	dDBD E4 -IR	67.1	3.59596	0.578114	125	0
001 30ms181010 BRCA2-Halo PCNA-iRFP IR tracking	dDBD E4 -IR	69.1	1.26492	0.274427	131	0
001 30ms181010 BRCA2-Halo PCNA-iRFP IR tracking	dDBD E4 -IR	69.5	0.0394016	0.398229	161	1
001 30ms181010 BRCA2-Halo PCNA-iRFP IR tracking	dDBD E4 -IR	72.1	0.00500401	0.327682	119	2
001 30ms181010 BRCA2-Halo PCNA-iRFP IR tracking	dDBD E4 -IR	73.1	1.1687	0.364893	131	0
001 30ms181010 BRCA2-Halo PCNA-iRFP IR tracking	dDBD E4 -IR	75.1	0.648973	0.242433	142	0
001 30ms181010 BRCA2-Halo PCNA-iRFP IR tracking	dDBD E4 -IR	77.1	1.75471	0.394379	141	0
001 30ms181010 BRCA2-Halo PCNA-iRFP IR tracking	dDBD E4 -IR	79.1	2.08265	0.373854	137	0
001 30ms181010 BRCA2-Halo PCNA-iRFP IR tracking	dDBD E4 -IR	80.1	1.82302	0.305131	139	0
001 30ms181010 BRCA2-Halo PCNA-iRFP IR tracking	dDBD E4 -IR	81.3	0.0134559	0.581664	167	2
001 30ms181010 BRCA2-Halo PCNA-iRFP IR tracking	dDBD E4 -IR	84.3	0.75442	0.290047	161	0
001 30ms181010 BRCA2-Halo PCNA-iRFP IR tracking	dDBD E4 -IR	88.1	0.00165246	0.127373	119	2
001 30ms181010 BRCA2-Halo PCNA-iRFP IR tracking	dDBD E4 -IR	97.1	0.627625	0.302784	139	0
001 30ms181010 BRCA2-Halo PCNA-iRFP IR tracking	dDBD E4 -IR	97.3	1.18405	0.768429	164	0
001 30ms181010 BRCA2-Halo PCNA-iRFP IR tracking	dDBD E4 -IR	102.1	0.949074	0.0798644	166	0
001 30ms181010 BRCA2-Halo PCNA-iRFP IR tracking	dDBD E4 -IR	106.2	0.00577646	0.172961	140	2
001 30ms181010 BRCA2-Halo PCNA-iRFP IR tracking	dDBD E4 -IR	106.4	0.00419758	0.0547074	159	2
001 30ms181010 BRCA2-Halo PCNA-iRFP IR tracking	dDBD E4 -IR	106.6	0.00719249	0.402405	189	2
001 30ms181010 BRCA2-Halo PCNA-iRFP IR tracking	dDBD E4 -IR	109.1	1.49502	0.368266	167	0
001 30ms181010 BRCA2-Halo PCNA-iRFP IR tracking	dDBD E4 -IR	112.2	0.00104011	0.150861	125	2
001 30ms181010 BRCA2-Halo PCNA-iRFP IR tracking	dDBD E4 -IR	119.1	1.09568	0.242998	172	0
001 30ms181010 BRCA2-Halo PCNA-iRFP IR tracking	dDBD E4 -IR	120.1	0.00617503	0.154031	141	2
001 30ms181010 BRCA2-Halo PCNA-iRFP IR tracking	dDBD E4 -IR	123.1	0.00922758	0.024054	180	2
001 30ms181010 BRCA2-Halo PCNA-iRFP IR tracking	dDBD E4 -IR	124.1	0.607485	0.408364	179	0
001 30ms181010 BRCA2-Halo PCNA-iRFP IR tracking	dDBD E4 -IR	125.1	0.814727	0.42048	197	0
001 30ms181010 BRCA2-Halo PCNA-iRFP IR tracking	dDBD E4 -IR	127.1	0.61525	0.249492	197	0
001 30ms181010 BRCA2-Halo PCNA-iRFP IR tracking	dDBD E4 -IR	130.1	0.00143266	0.251612	194	2
001 30ms181010 BRCA2-Halo PCNA-iRFP IR tracking	dDBD E4 -IR	131.1	1.16424	0.366	204	0
001 30ms181010 BRCA2-Halo PCNA-iRFP IR tracking	dDBD E4 -IR	133.3	1.89207	0.32903	136	0
001 30ms181010 BRCA2-Halo PCNA-iRFP IR tracking	dDBD E4 -IR	133.8	0.114715	0.615436	181	1
001 30ms181010 BRCA2-Halo PCNA-iRFP IR tracking	dDBD E4 -IR	134.1	2.87001	0.525686	205	0
001 30ms181010 BRCA2-Halo PCNA-iRFP IR tracking	dDBD E4 -IR	137.2	0.00726744	0.418646	207	2
001 30ms181010 BRCA2-Halo PCNA-iRFP IR tracking	dDBD E4 -IR	140.1	0.676527	0.0888856	211	0
001 30ms181010 BRCA2-Halo PCNA-iRFP IR tracking	dDBD E4 -IR	141.1	2.04657	0.441334	184	0
001 30ms181010 BRCA2-Halo PCNA-iRFP IR tracking	dDBD E4 -IR	143.2	1.09574	0.240395	223	0
001 30ms181010 BRCA2-Halo PCNA-iRFP IR tracking	dDBD E4 -IR	146.1	3.3214	0.486658	215	0
001 30ms181010 BRCA2-Halo PCNA-iRFP IR tracking	dDBD E4 -IR	147.1	0.00055458	0.0759206	0	2
001 30ms181010 BRCA2-Halo PCNA-iRFP IR tracking	dDBD E4 -IR	150.6	0.0100684	0.32614	224	1
001 30ms181010 BRCA2-Halo PCNA-iRFP IR tracking	dDBD E4 -IR	154.1	4.54107	0.449547	228	0
001 30ms181010 BRCA2-Halo PCNA-iRFP IR tracking	dDBD E4 -IR	158.1	2.60336	0.516247	234	0
001 30ms181010 BRCA2-Halo PCNA-iRFP IR tracking	dDBD E4 -IR	159.5	0.00621812	0.132481	235	2
001 30ms181010 BRCA2-Halo PCNA-iRFP IR tracking	dDBD E4 -IR	160.1	1.1973	0.278625	211	0
001 30ms181010 BRCA2-Halo PCNA-iRFP IR tracking	dDBD E4 -IR	162.1	1.79759	0.25479	238	0
001 30ms181010 BRCA2-Halo PCNA-iRFP IR tracking	dDBD E4 -IR	164.2	0.99876	0.252879	236	0
001 30ms181010 BRCA2-Halo PCNA-iRFP IR tracking	dDBD E4 -IR	169.1	0.345947	-0.0255367	240	0
001 30ms181010 BRCA2-Halo PCNA-iRFP IR tracking	dDBD E4 -IR	172.1	0.920386	0.114758	247	0
001 30ms181010 BRCA2-Halo PCNA-iRFP IR tracking	dDBD E4 -IR	176.2	0.00127452	0.064214	233	2
001 30ms181010 BRCA2-Halo PCNA-iRFP IR tracking	dDBD E4 -IR	176.3	0.960426	0.166387	253	0
001 30ms181010 BRCA2-Halo PCNA-iRFP IR tracking	dDBD E4 -IR	177.4	0.00106762	0.333864	252	2
001 30ms181010 BRCA2-Halo PCNA-iRFP IR tracking	dDBD E4 -IR	183.1	0.98258	0.134918	253	0
001 30ms181010 BRCA2-Halo PCNA-iRFP IR tracking	dDBD E4 -IR	187.1	1.59601	0.281336	262	0
001 30ms181010 BRCA2-Halo PCNA-iRFP IR tracking	dDBD E4 -IR	187.4	0.0746527	0.430636	279	1
001 30ms181010 BRCA2-Halo PCNA-iRFP IR tracking	dDBD E4 -IR	192.4	0.00716899	0.29406	233	2
001 30ms181010 BRCA2-Halo PCNA-iRFP IR tracking	dDBD E4 -IR	192.7	2.72774	0.509791	258	0
001 30ms181010 BRCA2-Halo PCNA-iRFP IR tracking	dDBD E4 -IR	195.1	0.136283	0.033579	271	0
001 30ms181010 BRCA2-Halo PCNA-iRFP IR tracking	dDBD E4 -IR	199.1	2.29064	0.227315	278	0
001 30ms181010 BRCA2-Halo PCNA-iRFP IR tracking	dDBD E4 -IR	201.3	0.345508	0.286933	279	0
001 30ms181010 BRCA2-Halo PCNA-iRFP IR tracking	dDBD E4 -IR	203.1	1.99629	0.545555	275	0
001 30ms181010 BRCA2-Halo PCNA-iRFP IR tracking	dDBD E4 -IR	207.1	0.00473489	0.161519	234	2
001 30ms181010 BRCA2-Halo PCNA-iRFP IR tracking	dDBD E4 -IR	209.1	1.28827	0.166155	285	0
001 30ms181010 BRCA2-Halo PCNA-iRFP IR tracking	dDBD E4 -IR	210.1	0.932728	0.174822	294	0
001 30ms181010 BRCA2-Halo PCNA-iRFP IR tracking	dDBD E4 -IR	212.6	0.00233516	0.0554603	306	1
001 30ms181010 BRCA2-Halo PCNA-iRFP IR tracking	dDBD E4 -IR	213.1	3.32345	0.503477	290	0
001 30ms181010 BRCA2-Halo PCNA-iRFP IR tracking	dDBD E4 -IR	215.4	0.00637153	0.213126	279	2
001 30ms181010 BRCA2-Halo PCNA-iRFP IR tracking	dDBD E4 -IR	226.1	0.000701624	0.00493482	283	2
001 30ms181010 BRCA2-Halo PCNA-iRFP IR tracking	dDBD E4 -IR	227.1	1.18589	0.483979	314	0
001 30ms181010 BRCA2-Halo PCNA-iRFP IR tracking	dDBD E4 -IR	241.1	1.13053	0.0982018	333	0
001 30ms181010 BRCA2-Halo PCNA-iRFP IR tracking	dDBD E4 -IR	242.1	2.24564	0.309121	339	0
001 30ms181010 BRCA2-Halo PCNA-iRFP IR tracking	dDBD E4 -IR	243.1	1.05576	0.37987	335	0
001 30ms181010 BRCA2-Halo PCNA-iRFP IR tracking	dDBD E4 -IR	244.3	2.50961	0.375049	338	0
001 30ms181010 BRCA2-Halo PCNA-iRFP IR tracking	dDBD E4 -IR	245.2	0.00277326	0.152197	270	2
001 30ms181010 BRCA2-Halo PCNA-iRFP IR tracking	dDBD E4 -IR	252.1	0.902368	0.0482325	350	0
001 30ms181010 BRCA2-Halo PCNA-iRFP IR tracking	dDBD E4 -IR	254.1	1.03829	0.709433	351	0
001 30ms181010 BRCA2-Halo PCNA-iRFP IR tracking	dDBD E4 -IR	260.3	3.24578	0.467861	360	0
001 30ms181010 BRCA2-Halo PCNA-iRFP IR tracking	dDBD E4 -IR	267.1	2.1509	0.390349	365	0
001 30ms181010 BRCA2-Halo PCNA-iRFP IR tracking	dDBD E4 -IR	272.2	0.0507366	0.191935	375	1
001 30ms181010 BRCA2-Halo PCNA-iRFP IR tracking	dDBD E4 -IR	280.1	1.74765	0.441222	387	0
001 30ms181010 BRCA2-Halo PCNA-iRFP IR tracking	dDBD E4 -IR	284.1	0.738866	0.454841	356	0
001 30ms181010 BRCA2-Halo PCNA-iRFP IR tracking	dDBD E4 -IR	284.12	1.28242	0.746598	370	0
001 30ms181010 BRCA2-Halo PCNA-iRFP IR tracking	dDBD E4 -IR	286.1	0.00298152	0.103811	391	1
001 30ms181010 BRCA2-Halo PCNA-iRFP IR tracking	dDBD E4 -IR	290.17	0.00576554	-0.068417	378	2
001 30ms181010 BRCA2-Halo PCNA-iRFP IR tracking	dDBD E4 -IR	290.4	0.116183	0.395041	277	1
001 30ms181010 BRCA2-Halo PCNA-iRFP IR tracking	dDBD E4 -IR	290.5	3.10452	0.374828	294	0
001 30ms181010 BRCA2-Halo PCNA-iRFP IR tracking	dDBD E4 -IR	290.9	0.00334071	0.229819	318	2
001 30ms181010 BRCA2-Halo PCNA-iRFP IR tracking	dDBD E4 -IR	295.1	2.09218	0.31809	407	0
001 30ms181010 BRCA2-Halo PCNA-iRFP IR tracking	dDBD E4 -IR	297.1	0.263987	0.301093	415	0
001 30ms181010 BRCA2-Halo PCNA-iRFP IR tracking	dDBD E4 -IR	297.2	0.00157348	0.208242	143	2
001 30ms181010 BRCA2-Halo PCNA-iRFP IR tracking	dDBD E4 -IR	297.4	0.00398183	0.203845	171	2
001 30ms181010 BRCA2-Halo PCNA-iRFP IR tracking	dDBD E4 -IR	297.6	0.0042523	0.0947006	335	2
001 30ms181010 BRCA2-Halo PCNA-iRFP IR tracking	dDBD E4 -IR	297.8	0.00542398	0.203369	361	2
001 30ms181010 BRCA2-Halo PCNA-iRFP IR tracking	dDBD E4 -IR	299.1	0.00439363	0.305112	373	2
001 30ms181010 BRCA2-Halo PCNA-iRFP IR tracking	dDBD E4 -IR	299.18	0.017538	0.195924	437	1
001 30ms181010 BRCA2-Halo PCNA-iRFP IR tracking	dDBD E4 -IR	299.4	0.00821622	0.500613	335	2
001 30ms181010 BRCA2-Halo PCNA-iRFP IR tracking	dDBD E4 -IR	303.2	0.00132454	0.296297	362	2
001 30ms181010 BRCA2-Halo PCNA-iRFP IR tracking	dDBD E4 -IR	305.1	1.556	0.382662	423	0
001 30ms181010 BRCA2-Halo PCNA-iRFP IR tracking	dDBD E4 -IR	308.3	4.2749	0.498893	430	0
001 30ms181010 BRCA2-Halo PCNA-iRFP IR tracking	dDBD E4 -IR	309.1	1.69262	0.249993	428	0
001 30ms181010 BRCA2-Halo PCNA-iRFP IR tracking	dDBD E4 -IR	316.1	0.003242	0.145005	411	2
001 30ms181010 BRCA2-Halo PCNA-iRFP IR tracking	dDBD E4 -IR	317.1	0.652429	0.0711099	445	0
001 30ms181010 BRCA2-Halo PCNA-iRFP IR tracking	dDBD E4 -IR	323.1	0.986325	0.111352	458	0
001 30ms181010 BRCA2-Halo PCNA-iRFP IR tracking	dDBD E4 -IR	325.1	3.88089	0.581522	465	0
001 30ms181010 BRCA2-Halo PCNA-iRFP IR tracking	dDBD E4 -IR	327.1	1.02557	0.536991	470	0
001 30ms181010 BRCA2-Halo PCNA-iRFP IR tracking	dDBD E4 -IR	328.1	1.11289	0.297286	477	0
001 30ms181010 BRCA2-Halo PCNA-iRFP IR tracking	dDBD E4 -IR	331.4	0.160639	0.632913	503	1
001 30ms181010 BRCA2-Halo PCNA-iRFP IR tracking	dDBD E4 -IR	332.1	0.330988	-0.0282402	442	0
001 30ms181010 BRCA2-Halo PCNA-iRFP IR tracking	dDBD E4 -IR	332.2	0.101957	0.34108	466	1
001 30ms181010 BRCA2-Halo PCNA-iRFP IR tracking	dDBD E4 -IR	332.3	3.8678	0.533011	480	0
001 30ms181010 BRCA2-Halo PCNA-iRFP IR tracking	dDBD E4 -IR	333.2	0.00863915	0.302266	500	2
001 30ms181010 BRCA2-Halo PCNA-iRFP IR tracking	dDBD E4 -IR	339.1	0.00242533	0.281947	483	2
001 30ms181010 BRCA2-Halo PCNA-iRFP IR tracking	dDBD E4 -IR	343.1	0.00315294	-0.0180462	560	2
001 30ms181010 BRCA2-Halo PCNA-iRFP IR tracking	dDBD E4 -IR	343.2	0.00959381	0.35465	517	2
001 30ms181010 BRCA2-Halo PCNA-iRFP IR tracking	dDBD E4 -IR	345.2	0.0115746	0.442238	510	2
001 30ms181010 BRCA2-Halo PCNA-iRFP IR tracking	dDBD E4 -IR	351.1	0.007526	0.35092	520	2
001 30ms181010 BRCA2-Halo PCNA-iRFP IR tracking	dDBD E4 -IR	355.1	0.430487	0.161441	534	0
001 30ms181010 BRCA2-Halo PCNA-iRFP IR tracking	dDBD E4 -IR	361.1	0.958001	0.194065	546	0
001 30ms181010 BRCA2-Halo PCNA-iRFP IR tracking	dDBD E4 -IR	377.1	1.56326	0.316601	573	0
001 30ms181010 BRCA2-Halo PCNA-iRFP IR tracking	dDBD E4 -IR	383.11	0.346578	0.163422	611	0
001 30ms181010 BRCA2-Halo PCNA-iRFP IR tracking	dDBD E4 -IR	383.3	1.82856	0.569331	568	0
001 30ms181010 BRCA2-Halo PCNA-iRFP IR tracking	dDBD E4 -IR	384.1	0.00113332	0.190155	559	2
001 30ms181010 BRCA2-Halo PCNA-iRFP IR tracking	dDBD E4 -IR	386.2	0.0033545	0.133748	597	2
001 30ms181010 BRCA2-Halo PCNA-iRFP IR tracking	dDBD E4 -IR	388.1	0.912629	0.457655	627	0
001 30ms181010 BRCA2-Halo PCNA-iRFP IR tracking	dDBD E4 -IR	392.1	0.00653574	0.424587	593	2
001 30ms181010 BRCA2-Halo PCNA-iRFP IR tracking	dDBD E4 -IR	398.1	0.00350706	0.0760592	659	0
001 30ms181010 BRCA2-Halo PCNA-iRFP IR tracking	dDBD E4 -IR	406.1	1.59383	0.295438	635	0
001 30ms181010 BRCA2-Halo PCNA-iRFP IR tracking	dDBD E4 -IR	406.6	0.00133151	0.148899	676	2
001 30ms181010 BRCA2-Halo PCNA-iRFP IR tracking	dDBD E4 -IR	407.1	2.25032	0.374503	690	0
001 30ms181010 BRCA2-Halo PCNA-iRFP IR tracking	dDBD E4 -IR	409.1	0.00287745	0.134723	670	2
001 30ms181010 BRCA2-Halo PCNA-iRFP IR tracking	dDBD E4 -IR	409.3	0.0100452	0.146781	708	2
001 30ms181010 BRCA2-Halo PCNA-iRFP IR tracking	dDBD E4 -IR	412.1	0.00163681	0.0275361	666	2
001 30ms181010 BRCA2-Halo PCNA-iRFP IR tracking	dDBD E4 -IR	412.8	0.000763229	0.121082	745	2
001 30ms181010 BRCA2-Halo PCNA-iRFP IR tracking	dDBD E4 -IR	414.1	2.26492	0.481522	743	0
001 30ms181010 BRCA2-Halo PCNA-iRFP IR tracking	dDBD E4 -IR	417.3	0.0142142	0.491559	740	2
001 30ms181010 BRCA2-Halo PCNA-iRFP IR tracking	dDBD E4 -IR	419.1	0.000989037	0.0502933	686	2
001 30ms181010 BRCA2-Halo PCNA-iRFP IR tracking	dDBD E4 -IR	420.1	1.86909	0.325303	774	0
001 30ms181010 BRCA2-Halo PCNA-iRFP IR tracking	dDBD E4 -IR	425.1	0.00318294	0.224165	799	2
001 30ms181010 BRCA2-Halo PCNA-iRFP IR tracking	dDBD E4 -IR	426.1	0.000740299	-0.153168	793	2
001 30ms181010 BRCA2-Halo PCNA-iRFP IR tracking	dDBD E4 -IR	428.1	0.0355909	0.281887	777	1
001 30ms181010 BRCA2-Halo PCNA-iRFP IR tracking	dDBD E4 -IR	430.1	1.66007	0.418659	791	0
001 30ms181010 BRCA2-Halo PCNA-iRFP IR tracking	dDBD E4 -IR	437.1	0.000336662	0.0912792	835	2
001 30ms181010 BRCA2-Halo PCNA-iRFP IR tracking	dDBD E4 -IR	439.1	0.369893	0.4021	831	0
001 30ms181010 BRCA2-Halo PCNA-iRFP IR tracking	dDBD E4 -IR	439.3	0.596511	0.521215	849	0
001 30ms181010 BRCA2-Halo PCNA-iRFP IR tracking	dDBD E4 -IR	440.2	0.00509418	0.257062	883	2
001 30ms181010 BRCA2-Halo PCNA-iRFP IR tracking	dDBD E4 -IR	444.1	1.10164	0.0483957	913	0
001 30ms181010 BRCA2-Halo PCNA-iRFP IR tracking	dDBD E4 -IR	448.1	0.00157161	0.0631895	928	2
001 30ms181010 BRCA2-Halo PCNA-iRFP IR tracking	dDBD E4 -IR	448.5	0.00690568	0.3055	951	2
001 30ms181010 BRCA2-Halo PCNA-iRFP IR tracking	dDBD E4 -IR	449.1	0.528977	-0.143845	939	0
001 30ms181010 BRCA2-Halo PCNA-iRFP IR tracking	dDBD E4 -IR	450.1	0.0704755	0.381269	965	1
001 30ms181010 BRCA2-Halo PCNA-iRFP IR tracking	dDBD E4 -IR	450.12	0.157802	0.124953	988	2
001 30ms181010 BRCA2-Halo PCNA-iRFP IR tracking	dDBD E4 -IR	450.4	0.21676	0.664082	900	1
001 30ms181010 BRCA2-Halo PCNA-iRFP IR tracking	dDBD E4 -IR	450.5	0.690628	0.25867	917	0
001 30ms181010 BRCA2-Halo PCNA-iRFP IR tracking	dDBD E4 -IR	450.8	0.210707	0.311819	948	1
001 30ms181010 BRCA2-Halo PCNA-iRFP IR tracking	dDBD E4 -IR	451.2	9.6769e-05	-0.160208	952	0
001 30ms181010 BRCA2-Halo PCNA-iRFP IR tracking	dDBD E4 -IR	452.1	0.0434633	-0.20644	950	0
001 30ms181010 BRCA2-Halo PCNA-iRFP IR tracking	dDBD E4 -IR	455.2	0.00684316	0.0939148	935	1
001 30ms181010 BRCA2-Halo PCNA-iRFP IR tracking	dDBD E4 -IR	455.6	0.0019615	0.0661155	954	1
001 30ms181010 BRCA2-Halo PCNA-iRFP IR tracking	dDBD E4 -IR	456.3	0.608461	0.224531	953	0
001 30ms181010 BRCA2-Halo PCNA-iRFP IR tracking	dDBD E4 -IR	457.1	3.04683	0.544684	972	0
001 30ms181010 BRCA2-Halo PCNA-iRFP IR tracking	dDBD E4 -IR	465.3	1.20125	0.233063	1098	0
001 30ms181010 BRCA2-Halo PCNA-iRFP IR tracking	dDBD E4 -IR	468.1	0.000796759	0.109129	1139	2
001 30ms181010 BRCA2-Halo PCNA-iRFP IR tracking	dDBD E4 -IR	472.11	0.297966	0.0313029	1160	1
001 30ms181010 BRCA2-Halo PCNA-iRFP IR tracking	dDBD E4 -IR	472.9	0.18638	0.473519	1142	1
001 30ms181010 BRCA2-Halo PCNA-iRFP IR tracking	dDBD E4 -IR	477.1	0.000828149	0.136873	1138	2
001 30ms181010 BRCA2-Halo PCNA-iRFP IR tracking	dDBD E4 -IR	478.1	0.579516	0.187184	1200	0
001 30ms181010 BRCA2-Halo PCNA-iRFP IR tracking	dDBD E4 -IR	484.1	0.00174894	0.088778	1241	2
001 30ms181010 BRCA2-Halo PCNA-iRFP IR tracking	dDBD E4 -IR	486.1	0.00886781	0.418552	1283	2
001 30ms181010 BRCA2-Halo PCNA-iRFP IR tracking	dDBD E4 -IR	486.7	0.0038304	0.0986919	1352	2
001 30ms181010 BRCA2-Halo PCNA-iRFP IR tracking	dDBD E4 -IR	493.1	0.00216113	0.29578	1324	2
001 30ms181010 BRCA2-Halo PCNA-iRFP IR tracking	dDBD E4 -IR	494.1	1.09113	0.142564	1352	0
001 30ms181010 BRCA2-Halo PCNA-iRFP IR tracking	dDBD E4 -IR	495.1	0.776137	0.146356	1352	0
001 30ms181010 BRCA2-Halo PCNA-iRFP IR tracking	dDBD E4 -IR	496.5	0.296619	0.143672	1340	0
001 30ms181010 BRCA2-Halo PCNA-iRFP IR tracking	dDBD E4 -IR	496.6	0.00168903	0.147948	1351	2
001 30ms181010 BRCA2-Halo PCNA-iRFP IR tracking	dDBD E4 -IR	498.1	0.824037	0.391597	1363	0
001 30ms181010 BRCA2-Halo PCNA-iRFP IR tracking	dDBD E4 -IR	500.1	2.05526	0.444876	1375	0
001 30ms181010 BRCA2-Halo PCNA-iRFP IR tracking	dDBD E4 -IR	501.1	2.02085	0.371519	1374	0
001 30ms181010 BRCA2-Halo PCNA-iRFP IR tracking	dDBD E4 -IR	503.3	0.324275	0.383654	1375	0
001 30ms181010 BRCA2-Halo PCNA-iRFP IR tracking	dDBD E4 -IR	504.2	1.56706	0.612044	1399	0
001 30ms181010 BRCA2-Halo PCNA-iRFP IR tracking	dDBD E4 -IR	507.1	0.419495	0.354418	1410	0
001 30ms181010 BRCA2-Halo PCNA-iRFP IR tracking	dDBD E4 -IR	508.1	1.75722	0.306129	1417	0
001 30ms181010 BRCA2-Halo PCNA-iRFP IR tracking	dDBD E4 -IR	509.1	0.000697779	0.149514	1414	2
001 30ms181010 BRCA2-Halo PCNA-iRFP IR tracking	dDBD E4 -IR	510.1	0.897287	0.289048	1425	0
001 30ms181010 BRCA2-Halo PCNA-iRFP IR tracking	dDBD E4 -IR	511.1	0.687254	-0.111001	1452	0
001 30ms181010 BRCA2-Halo PCNA-iRFP IR tracking	dDBD E4 -IR	513.1	0.00412589	0.368485	1448	2
001 30ms181010 BRCA2-Halo PCNA-iRFP IR tracking	dDBD E4 -IR	520.1	0.000983751	0.136453	1421	2
001 30ms181010 BRCA2-Halo PCNA-iRFP IR tracking	dDBD E4 -IR	523.1	0.0584669	0.448941	1467	1
001 30ms181010 BRCA2-Halo PCNA-iRFP IR tracking	dDBD E4 -IR	525.1	0.000758756	0.080965	1543	2
001 30ms181010 BRCA2-Halo PCNA-iRFP IR tracking	dDBD E4 -IR	529.1	0.00148769	0.248559	1565	2
001 30ms181010 BRCA2-Halo PCNA-iRFP IR tracking	dDBD E4 -IR	531.1	2.40053	0.477669	1609	0
001 30ms181010 BRCA2-Halo PCNA-iRFP IR tracking	dDBD E4 -IR	532.1	2.0997	0.355285	1623	0
001 30ms181010 BRCA2-Halo PCNA-iRFP IR tracking	dDBD E4 -IR	533.1	2.11011	0.390081	1632	0
001 30ms181010 BRCA2-Halo PCNA-iRFP IR tracking	dDBD E4 -IR	536.9	0.821217	0.655242	1647	0
001 30ms181010 BRCA2-Halo PCNA-iRFP IR tracking	dDBD E4 -IR	538.1	3.91457	0.660904	1645	0
001 30ms181010 BRCA2-Halo PCNA-iRFP IR tracking	dDBD E4 -IR	541.2	1.81751	0.571391	1687	0
001 30ms181010 BRCA2-Halo PCNA-iRFP IR tracking	dDBD E4 -IR	542.1	0.00410609	0.462543	1657	2
001 30ms181010 BRCA2-Halo PCNA-iRFP IR tracking	dDBD E4 -IR	547.2	1.00482	0.597744	1712	0
001 30ms181010 BRCA2-Halo PCNA-iRFP IR tracking	dDBD E4 -IR	548.1	0.743849	0.0997752	1718	0
001 30ms181010 BRCA2-Halo PCNA-iRFP IR tracking	dDBD E4 -IR	550.2	0.0647396	0.0820953	1727	1
001 30ms181010 BRCA2-Halo PCNA-iRFP IR tracking	dDBD E4 -IR	551.1	0.181768	-0.120456	1760	0
001 30ms181010 BRCA2-Halo PCNA-iRFP IR tracking	dDBD E4 -IR	555.1	0.927782	0.54886	1746	0
001 30ms181010 BRCA2-Halo PCNA-iRFP IR tracking	dDBD E4 -IR	555.2	0.3898	0.578846	1788	1
001 30ms181010 BRCA2-Halo PCNA-iRFP IR tracking	dDBD E4 -IR	556.2	0.00395797	0.348934	1778	2
001 30ms181010 BRCA2-Halo PCNA-iRFP IR tracking	dDBD E4 -IR	558.1	0.960736	0.528755	1802	0
001 30ms181010 BRCA2-Halo PCNA-iRFP IR tracking	dDBD E4 -IR	568.2	0.00127182	0.26303	1784	2
001 30ms181010 BRCA2-Halo PCNA-iRFP IR tracking	dDBD E4 -IR	568.4	0.00409057	0.376255	1820	2
001 30ms181010 BRCA2-Halo PCNA-iRFP IR tracking	dDBD E4 -IR	569.1	0.823584	0.383761	1811	0
001 30ms181010 BRCA2-Halo PCNA-iRFP IR tracking	dDBD E4 -IR	571.1	0.238399	0.540414	1827	1
001 30ms181010 BRCA2-Halo PCNA-iRFP IR tracking	dDBD E4 -IR	571.5	0.0263722	0.429281	1864	1
001 30ms181010 BRCA2-Halo PCNA-iRFP IR tracking	dDBD E4 -IR	572.13	0.000327954	0.0916574	1896	2
001 30ms181010 BRCA2-Halo PCNA-iRFP IR tracking	dDBD E4 -IR	572.6	0.00623723	0.237737	1817	2
001 30ms181010 BRCA2-Halo PCNA-iRFP IR tracking	dDBD E4 -IR	572.8	0.00229703	0.181956	1837	2
001 30ms181010 BRCA2-Halo PCNA-iRFP IR tracking	dDBD E4 -IR	573.1	0.379546	0.386577	1860	2
001 30ms181010 BRCA2-Halo PCNA-iRFP IR tracking	dDBD E4 -IR	576.1	0.00325012	0.21771	1804	2
001 30ms181010 BRCA2-Halo PCNA-iRFP IR tracking	dDBD E4 -IR	577.1	0.448494	0.149014	1895	0
001 30ms181010 BRCA2-Halo PCNA-iRFP IR tracking	dDBD E4 -IR	581.2	0.00174289	0.167875	1877	2
001 30ms181010 BRCA2-Halo PCNA-iRFP IR tracking	dDBD E4 -IR	583.1	0.0633681	0.363949	1942	1
001 30ms181010 BRCA2-Halo PCNA-iRFP IR tracking	dDBD E4 -IR	585.1	0.00100017	-0.0167944	1924	2
001 30ms181010 BRCA2-Halo PCNA-iRFP IR tracking	dDBD E4 -IR	588.1	1.25443	0.39879	1976	0
002 30ms181005 BRCA2-Halo PCNA-iRFP IR tracking	dDBD E4 -IR	4.3	0.733332	0.0720654	6	0
002 30ms181005 BRCA2-Halo PCNA-iRFP IR tracking	dDBD E4 -IR	8.1	0.0226132	0.325647	0	2
002 30ms181005 BRCA2-Halo PCNA-iRFP IR tracking	dDBD E4 -IR	17.1	1.75271	0.307202	17	0
002 30ms181005 BRCA2-Halo PCNA-iRFP IR tracking	dDBD E4 -IR	18.1	0.251273	-0.0141641	7	0
002 30ms181005 BRCA2-Halo PCNA-iRFP IR tracking	dDBD E4 -IR	20.1	3.99669	0.561643	27	0
002 30ms181005 BRCA2-Halo PCNA-iRFP IR tracking	dDBD E4 -IR	26.1	0.00543722	0.250546	0	2
002 30ms181005 BRCA2-Halo PCNA-iRFP IR tracking	dDBD E4 -IR	27.4	0.00708731	0.133768	10	1
002 30ms181005 BRCA2-Halo PCNA-iRFP IR tracking	dDBD E4 -IR	27.5	0.557328	0.306332	22	0
002 30ms181005 BRCA2-Halo PCNA-iRFP IR tracking	dDBD E4 -IR	28.3	3.49762	0.574001	43	0
002 30ms181005 BRCA2-Halo PCNA-iRFP IR tracking	dDBD E4 -IR	29.5	0.00691525	0.238274	34	2
002 30ms181005 BRCA2-Halo PCNA-iRFP IR tracking	dDBD E4 -IR	29.6	0.00168563	-0.0401332	48	1
002 30ms181005 BRCA2-Halo PCNA-iRFP IR tracking	dDBD E4 -IR	30.1	0.0026972	0.201459	0	2
002 30ms181005 BRCA2-Halo PCNA-iRFP IR tracking	dDBD E4 -IR	38.1	0.00255035	0.193505	62	2
002 30ms181005 BRCA2-Halo PCNA-iRFP IR tracking	dDBD E4 -IR	39.1	0.948329	0.229659	85	0
002 30ms181005 BRCA2-Halo PCNA-iRFP IR tracking	dDBD E4 -IR	41.1	1.18762	0.196039	86	0
002 30ms181005 BRCA2-Halo PCNA-iRFP IR tracking	dDBD E4 -IR	45.1	0.60657	0.14652	123	0
002 30ms181005 BRCA2-Halo PCNA-iRFP IR tracking	dDBD E4 -IR	45.2	0.00451415	0.201248	135	2
002 30ms181005 BRCA2-Halo PCNA-iRFP IR tracking	dDBD E4 -IR	47.1	4.35158	0.442481	139	0
002 30ms181005 BRCA2-Halo PCNA-iRFP IR tracking	dDBD E4 -IR	48.14	0.00790065	0.418347	117	0
002 30ms181005 BRCA2-Halo PCNA-iRFP IR tracking	dDBD E4 -IR	48.15	0.00420486	0.197429	128	2
002 30ms181005 BRCA2-Halo PCNA-iRFP IR tracking	dDBD E4 -IR	48.5	0.00174059	0.159326	14	2
002 30ms181005 BRCA2-Halo PCNA-iRFP IR tracking	dDBD E4 -IR	48.7	0.0024869	0.181443	27	2
002 30ms181005 BRCA2-Halo PCNA-iRFP IR tracking	dDBD E4 -IR	48.9	0.00156466	0.131932	92	2
002 30ms181005 BRCA2-Halo PCNA-iRFP IR tracking	dDBD E4 -IR	50.2	0.00505583	0.0851761	133	2
002 30ms181005 BRCA2-Halo PCNA-iRFP IR tracking	dDBD E4 -IR	51.4	0.78187	0.445694	151	0
002 30ms181005 BRCA2-Halo PCNA-iRFP IR tracking	dDBD E4 -IR	56.3	0.00276587	0.179968	7	2
002 30ms181005 BRCA2-Halo PCNA-iRFP IR tracking	dDBD E4 -IR	56.5	0.000749964	-0.0249695	106	2
002 30ms181005 BRCA2-Halo PCNA-iRFP IR tracking	dDBD E4 -IR	56.7	4.13176e-05	-0.0359158	126	2
002 30ms181005 BRCA2-Halo PCNA-iRFP IR tracking	dDBD E4 -IR	59.1	6.26729	0.648197	179	0
002 30ms181005 BRCA2-Halo PCNA-iRFP IR tracking	dDBD E4 -IR	61.5	0.0111601	0.262027	200	2
002 30ms181005 BRCA2-Halo PCNA-iRFP IR tracking	dDBD E4 -IR	61.7	0.0117888	0.156273	241	2
002 30ms181005 BRCA2-Halo PCNA-iRFP IR tracking	dDBD E4 -IR	61.8	0.0221733	0.221602	255	1
002 30ms181005 BRCA2-Halo PCNA-iRFP IR tracking	dDBD E4 -IR	61.9	0.0180027	0.602415	270	2
002 30ms181005 BRCA2-Halo PCNA-iRFP IR tracking	dDBD E4 -IR	62.1	1.10544	0.193793	180	0
002 30ms181005 BRCA2-Halo PCNA-iRFP IR tracking	dDBD E4 -IR	65.7	0.00629288	0.168652	203	2
002 30ms181005 BRCA2-Halo PCNA-iRFP IR tracking	dDBD E4 -IR	67.1	0.822117	0.0534987	178	0
002 30ms181005 BRCA2-Halo PCNA-iRFP IR tracking	dDBD E4 -IR	68.1	1.09459	0.298987	186	0
002 30ms181005 BRCA2-Halo PCNA-iRFP IR tracking	dDBD E4 -IR	78.3	0.78867	0.27913	190	0
002 30ms181005 BRCA2-Halo PCNA-iRFP IR tracking	dDBD E4 -IR	80.1	1.324	0.225939	198	0
002 30ms181005 BRCA2-Halo PCNA-iRFP IR tracking	dDBD E4 -IR	81.1	1.26489	0.249879	196	0
002 30ms181005 BRCA2-Halo PCNA-iRFP IR tracking	dDBD E4 -IR	81.2	0.0367402	0.300412	222	1
002 30ms181005 BRCA2-Halo PCNA-iRFP IR tracking	dDBD E4 -IR	82.1	2.45119	0.405436	187	0
002 30ms181005 BRCA2-Halo PCNA-iRFP IR tracking	dDBD E4 -IR	84.1	2.37777	0.41902	204	0
002 30ms181005 BRCA2-Halo PCNA-iRFP IR tracking	dDBD E4 -IR	86.1	9.12269	0.580336	212	0
002 30ms181005 BRCA2-Halo PCNA-iRFP IR tracking	dDBD E4 -IR	88.1	2.68395	0.293071	211	0
002 30ms181005 BRCA2-Halo PCNA-iRFP IR tracking	dDBD E4 -IR	89.1	1.27679	0.478861	201	0
002 30ms181005 BRCA2-Halo PCNA-iRFP IR tracking	dDBD E4 -IR	91.2	0.00136289	0.162509	235	2
002 30ms181005 BRCA2-Halo PCNA-iRFP IR tracking	dDBD E4 -IR	91.4	0.340476	0.0217086	280	0
002 30ms181005 BRCA2-Halo PCNA-iRFP IR tracking	dDBD E4 -IR	96.1	0.281205	-0.0515941	216	0
002 30ms181005 BRCA2-Halo PCNA-iRFP IR tracking	dDBD E4 -IR	96.2	0.00619224	0.151432	227	2
002 30ms181005 BRCA2-Halo PCNA-iRFP IR tracking	dDBD E4 -IR	100.2	0.0912856	0.620464	232	1
002 30ms181005 BRCA2-Halo PCNA-iRFP IR tracking	dDBD E4 -IR	101.1	0.838911	0.29114	237	0
002 30ms181005 BRCA2-Halo PCNA-iRFP IR tracking	dDBD E4 -IR	105.1	2.13423	0.422636	244	0
[truncated: 3,918 more rows]

## Sheet: dDBD +IR
cellID	condition	tracklet ID	D[um/s2]	Smmss	frame	state
[truncated: 5,472 more rows]

[truncated: 4 more sheets: dCTD -IR, dCTD +IR, dDBDdCTD -IR, dDBDdCTD +IR]
